# Supplementary material for: Distinct Transcriptional Changes in Response to Patulin Underlie Toxin Biosorption Differences in Saccharomyces cerevisiae
Source: MDPI journal article supplement (doi:10.3390/toxins11070400), 2019-07-10
Supplement: s1 [file s1]

| Table S1. Summary statistics of RNA sequencing reads and mapping to <i>S. cere</i> |           |           |                  |       |                  |
|------------------------------------------------------------------------------------|-----------|-----------|------------------|-------|------------------|
| Sample                                                                             | Replicate | Treatment | Number Raw Reads | Q20 % | Total read count |
| WA                                                                                 | 2         | Control   | 16831498         | 97.17 | 14161892         |
| WA                                                                                 | 3         | Control   | 18613634         | 97.23 | 15546563         |
| WA                                                                                 | 4         | Control   | 19217926         | 96.81 | 16036387         |
| WE                                                                                 | 3         | Control   | 18302888         | 97.26 | 15620111         |
| WE                                                                                 | 4         | Control   | 21871922         | 97.23 | 18515199         |
| WA                                                                                 | 1         | Patulin   | 22181400         | 97.1  | 18373123         |
| WA                                                                                 | 3         | Patulin   | 16877538         | 97.18 | 14084672         |
| WA                                                                                 | 4         | Patulin   | 19104102         | 97.27 | 16208961         |
| WE                                                                                 | 2         | Patulin   | 20767430         | 97.1  | 17594079         |
| WE                                                                                 | 3         | Patulin   | 19596870         | 97.09 | 16725189         |
| WE                                                                                 | 4         | Patulin   | 17801742         | 97.27 | 14983188         |

| visiae genome      |        |
|--------------------|--------|
| Mapping percentage |        |
|                    | 83.70% |
|                    | 83.80% |
|                    | 83.60% |
|                    | 83.90% |
|                    | 84.10% |
|                    | 84.00% |
|                    | 83.60% |
|                    | 83.90% |
|                    | 84.30% |
|                    | 84.10% |
|                    | 83.30% |
