# Supplementary material for: Distinct Transcriptional Changes in Response to Patulin Underlie Toxin Biosorption Differences in Saccharomyces cerevisiae
Source: MDPI journal article supplement (doi:10.3390/toxins11070400), 2019-07-10
Supplement: s1 [file s1]

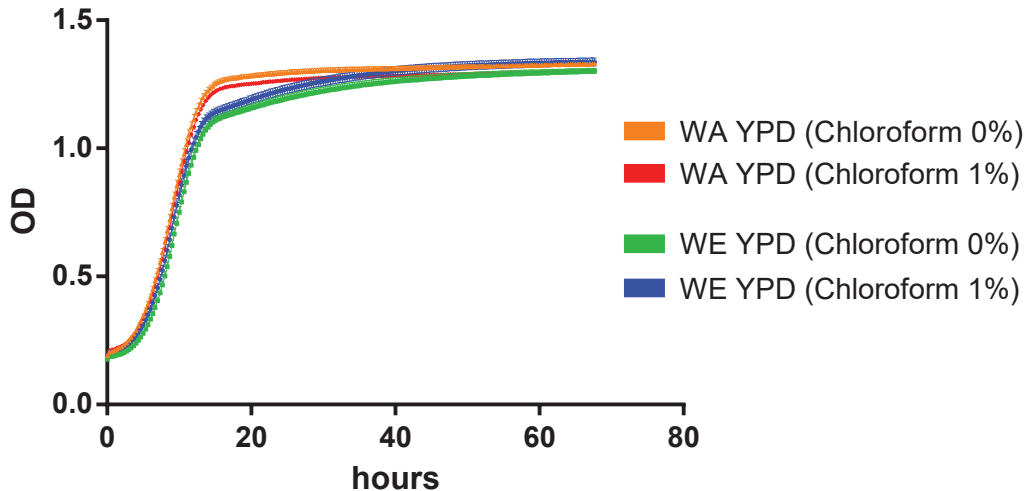

Figure S1. Effect of chloroform on the growth of the WE and WA strains. Isolates were grown in YPD control and in YPD containing 1% of chloroform (n=3). Error bars indicate the SEM.
