# Supplementary material for: Distinct Transcriptional Changes in Response to Patulin Underlie Toxin Biosorption Differences in Saccharomyces cerevisiae
Source: MDPI journal article supplement (doi:10.3390/toxins11070400), 2019-07-10
Supplement: s1 [file s1]

| Table S2 Differential gene expression data and GO-enrichment analysis of differentially |          |          |          |          |          |          |          |          |          |  |
|-----------------------------------------------------------------------------------------|----------|----------|----------|----------|----------|----------|----------|----------|----------|--|
| Gene ID                                                                                 | WA_2     | WA_3     | WA_4     | WA_PT_1  | WA_PT_3  | WA_PT_4  | Ratio    | WE_3     | WE_4     |  |
| YOR383C                                                                                 | 338.5586 | 451.9001 | 387.3183 | 302.6557 | 324.9383 | 303.3148 | -0.33935 | 14855.08 | 12529.08 |  |
| YOR382W                                                                                 | 277.5259 | 192.8239 | 183.7786 | 167.4456 | 157.8601 | 134.0456 | -0.50998 | 6615.249 | 5494.531 |  |
| YDR036C                                                                                 | 3.45468  | 5.933043 | 5.928341 | 0        | 0        | 0        | #NUM!    | 1038.832 | 928.0471 |  |
| YIR019C                                                                                 | 56694.75 | 54082.65 | 58124.42 | 46720.9  | 47855.81 | 56035.93 | -0.16534 | 2063.049 | 2475.963 |  |
| YAL065C                                                                                 | 1756.129 | 1586.1   | 1502.834 | 1736.241 | 1865.515 | 1720.088 | 0.135411 | 20.23699 | 36.87605 |  |
| YOR388C                                                                                 | 8526.15  | 9835.996 | 8319.438 | 8130.514 | 7652.182 | 6443.971 | -0.26355 | 751.0174 | 707.6689 |  |
| YKL209C                                                                                 | 2771.805 | 3054.528 | 3175.615 | 3490.39  | 3865.844 | 4638.759 | 0.414123 | 233.8497 | 185.2582 |  |
| YGL089C                                                                                 | 134.7325 | 145.3595 | 108.6863 | 126.2558 | 114.0741 | 117.4122 | -0.12003 | 17207.07 | 14433.46 |  |
| YNL145W                                                                                 | 10129.12 | 10983.05 | 9085.183 | 10317.16 | 11653.99 | 9812.722 | 0.073873 | 6.745665 | 22.82803 |  |
| YOR133W                                                                                 | 29096.46 | 26801.53 | 25935.5  | 28990.47 | 27838.69 | 26966.64 | 0.034186 | 4238.526 | 3476.006 |  |
| YAL063C                                                                                 | 2642.83  | 3004.097 | 3076.809 | 2904.778 | 3365.762 | 4024.302 | 0.238904 | 70.82948 | 84.2881  |  |
| YKR102W                                                                                 | 3071.21  | 2705.467 | 3469.068 | 2586.9   | 2831.111 | 3368.751 | -0.07346 | 0        | 0        |  |
| YHL047C                                                                                 | 3.45468  | 0        | 1.976114 | 3.581724 | 2.304527 | 1.956869 | 0.530265 | 665.5723 | 672.5488 |  |
| YJR161C                                                                                 | 26.48588 | 25.70985 | 41.49839 | 51.03957 | 36.87243 | 43.05113 | 0.48313  | 1491.916 | 1521.576 |  |
| YGL032C                                                                                 | 1722.734 | 1778.924 | 1525.56  | 1712.064 | 2066.008 | 1710.304 | 0.126619 | 11.24277 | 5.268006 |  |
| YFL026W                                                                                 | 10858.06 | 11938.27 | 11004.98 | 12237.86 | 12800.49 | 11007.39 | 0.09275  | 40.47399 | 40.38805 |  |
| YGR289C                                                                                 | 0        | 1.977681 | 0        | 0        | 0        | 0        | #NUM!    | 2132.754 | 1882.434 |  |
| YOL158C                                                                                 | 0        | 0        | 1.976114 | 1.790862 | 0        | 1.956869 | 0.923352 | 2100.15  | 2141.445 |  |
| YIL015W                                                                                 | 1955.349 | 2455.291 | 2062.075 | 2593.168 | 2639.836 | 2411.842 | 0.240117 | 40.47399 | 52.68006 |  |
| YGR234W                                                                                 | 2890.415 | 3558.837 | 2716.168 | 2551.978 | 2548.807 | 2527.297 | -0.26488 | 23660.42 | 20705.02 |  |
| YKL178C                                                                                 | 42.60772 | 38.56478 | 34.58199 | 29.54922 | 38.02469 | 28.37461 | -0.27074 | 4355.451 | 4002.807 |  |
| YJR004C                                                                                 | 397.2882 | 389.6031 | 259.8589 | 282.0608 | 303.0453 | 368.8699 | -0.13389 | 15703.91 | 17069.22 |  |
| YIL014C- <i>t</i>                                                                       | 710.5125 | 648.6793 | 588.8819 | 696.6453 | 730.535  | 717.1926 | 0.138508 | 2.248555 | 0        |  |
| YLR040C                                                                                 | 318.9821 | 254.132  | 304.3215 | 256.9887 | 262.7161 | 219.1694 | -0.24796 | 7258.335 | 6542.864 |  |
| YKR097W                                                                                 | 1780.312 | 2140.84  | 1896.081 | 1530.292 | 1482.963 | 1174.122 | -0.47429 | 50.59249 | 71.11809 |  |
| YOL159C- <i>t</i>                                                                       | 0        | 0        | 0        | 0        | 0        | 0        | #DIV/0!  | 377.7572 | 378.4185 |  |
| YFL062W                                                                                 | 130.1263 | 146.3484 | 120.5429 | 136.1055 | 102.5514 | 120.3475 | -0.1452  | 2029.321 | 1741.076 |  |
| YDR037W                                                                                 | 2117.719 | 1969.77  | 1886.2   | 2176.793 | 2139.753 | 1966.654 | 0.072877 | 21746.9  | 20316.94 |  |
| YEL073C                                                                                 | 1166.53  | 1003.673 | 1142.194 | 954.5295 | 1026.667 | 1098.782 | -0.10496 | 47.21965 | 35.12004 |  |
| YFL059W                                                                                 | 4094.947 | 4052.268 | 3991.75  | 4257.775 | 3913.087 | 3595.748 | -0.04495 | 51.71676 | 59.70407 |  |
| YCL049C                                                                                 | 2862.778 | 2638.226 | 2546.222 | 2794.64  | 2766.585 | 2655.472 | 0.030067 | 97.81214 | 168.5762 |  |
| YLR237W                                                                                 | 16960.17 | 23002.41 | 18706.88 | 20975.47 | 21099.1  | 16786.03 | 0.004692 | 1785.353 | 1762.148 |  |
| YPL187W                                                                                 | 16.12184 | 67.24115 | 17.78502 | 36.71267 | 36.87243 | 13.69809 | -0.21269 | 52034.93 | 46566.54 |  |
| YDR461W                                                                                 | 947.7338 | 1157.932 | 759.8157 | 913.3396 | 1107.325 | 865.9147 | 0.010583 | 6.745665 | 4.390005 |  |
| YGR287C                                                                                 | 65.63892 | 57.35275 | 48.41478 | 53.72586 | 66.83128 | 76.31791 | 0.199859 | 1459.312 | 1475.92  |  |
| YAL064W- <i>t</i>                                                                       | 593.0534 | 615.0587 | 677.807  | 651.8738 | 707.4898 | 672.1846 | 0.107312 | 25.85838 | 22.82803 |  |
| YCR097W                                                                                 | 717.4218 | 524.0854 | 543.4313 | 496.9642 | 614.1564 | 588.0393 | -0.07105 | 0        | 0        |  |
| YDR380W                                                                                 | 3990.155 | 4749.401 | 4055.973 | 4829.955 | 4930.535 | 4251.299 | 0.131001 | 773.5029 | 748.9349 |  |
| YJL218W                                                                                 | 461.7755 | 378.7259 | 383.366  | 323.2506 | 301.893  | 351.2581 | -0.3259  | 0        | 0        |  |
| YGR288W                                                                                 | 0        | 0        | 0        | 0        | 0        | 0        | #DIV/0!  | 277.6965 | 262.5223 |  |
| YCL026C- <i>t</i>                                                                       | 403.046  | 378.7259 | 403.1272 | 463.8333 | 455.1441 | 348.3228 | 0.096994 | 2798.327 | 2443.477 |  |
| YJR153W                                                                                 | 383.4695 | 391.5808 | 382.378  | 392.1988 | 338.7655 | 289.6167 | -0.18153 | 0        | 0        |  |
| YNL333W                                                                                 | 470.988  | 443.0005 | 381.3899 | 386.8262 | 414.8148 | 363.9777 | -0.15228 | 8.99422  | 3.512004 |  |
| YPR192W                                                                                 | 1824.071 | 2658.003 | 1912.878 | 1568.795 | 1433.416 | 1076.278 | -0.6489  | 35.97688 | 28.09603 |  |
| YJL048C                                                                                 | 4504.902 | 5724.397 | 5033.161 | 4562.221 | 4223.046 | 4343.272 | -0.21728 | 673.4422 | 679.5728 |  |
| YDR385W                                                                                 | 13407.61 | 13209.92 | 14025.47 | 14470.17 | 14473.58 | 14959.29 | 0.111314 | 49333.3  | 45224.96 |  |
| YLR411W                                                                                 | 6432.614 | 6115.978 | 6297.874 | 4673.255 | 4696.626 | 4446.986 | -0.44786 | 1915.769 | 1671.714 |  |
| YGR295C                                                                                 | 435.2897 | 496.3979 | 472.2912 | 411.0028 | 382.5515 | 311.1422 | -0.34587 | 2.248555 | 4.390005 |  |
| YFR055W                                                                                 | 3698.811 | 4069.078 | 3999.654 | 3527.103 | 3554.733 | 3632.928 | -0.13521 | 1095.046 | 1129.109 |  |
| YMR303C                                                                                 | 8092.012 | 9139.852 | 7691.034 | 7857.407 | 8444.939 | 8860.705 | 0.013835 | 36661.56 | 32444.77 |  |

|           |          |          |          |          |          |          |          |          |          |
|-----------|----------|----------|----------|----------|----------|----------|----------|----------|----------|
| YDR539W   | 300.5571 | 368.8375 | 258.8709 | 256.9887 | 244.2799 | 273.9617 | -0.25991 | 1532.39  | 1454.848 |
| YJL222W   | 371.9539 | 328.295  | 261.8351 | 299.074  | 269.6297 | 280.8108 | -0.17952 | 0        | 1.756002 |
| YEL077C   | 362.7414 | 531.0073 | 425.8525 | 358.1724 | 409.0535 | 409.9641 | -0.16475 | 6.745665 | 5.268006 |
| YCL054W-1 | 315.5274 | 287.7526 | 261.8351 | 320.5643 | 337.6132 | 249.5009 | 0.069289 | 1.124277 | 0        |
| YBR297W   | 87.51856 | 137.4488 | 132.3996 | 62.68017 | 108.3128 | 98.82191 | -0.40544 | 1304.162 | 1146.669 |
| YDR038C   | 36.84992 | 31.64289 | 23.71336 | 16.11776 | 18.43622 | 19.56869 | -0.76863 | 472.1965 | 433.7325 |
| YGR052W   | 750.8171 | 713.9428 | 679.7831 | 325.9369 | 407.9013 | 366.913  | -0.96218 | 2010.208 | 2015.89  |
| YLL026W   | 4016.641 | 3957.339 | 3832.672 | 3262.951 | 3014.321 | 3349.182 | -0.29452 | 13223.75 | 13583.55 |
| YBR296C   | 697.8453 | 1025.428 | 787.4813 | 357.277  | 444.7737 | 348.3228 | -1.12602 | 17.98844 | 9.658012 |
| YPR182W   | 1316.233 | 1110.468 | 1101.683 | 1147.047 | 1099.259 | 962.7798 | -0.13685 | 175.3873 | 167.6982 |
| YDL168W   | 1552.303 | 1492.16  | 1411.933 | 1537.455 | 1425.35  | 1321.865 | -0.05669 | 5634.879 | 5218.838 |
| YDL222C   | 1307.021 | 1827.377 | 1572.986 | 881.9996 | 852.675  | 734.8045 | -0.93072 | 107.9306 | 117.6521 |
| YMR058W   | 1938.075 | 2070.632 | 1996.863 | 2023.674 | 2127.078 | 2211.262 | 0.083183 | 8152.136 | 8736.111 |
| YML054C   | 1772.251 | 2131.94  | 1912.878 | 1619.835 | 1586.667 | 1433.407 | -0.3262  | 311.4249 | 247.5963 |
| YLR136C   | 96.73103 | 80.09608 | 81.02066 | 60.88931 | 62.22223 | 68.49043 | -0.42841 | 720.6619 | 682.2068 |
| YHR043C   | 207.2808 | 183.9243 | 189.7069 | 223.8578 | 191.2757 | 170.2476 | 0.011057 | 1245.699 | 1211.641 |
| YGR256W   | 1422.177 | 1835.288 | 1418.85  | 1307.329 | 1314.733 | 1171.186 | -0.30194 | 215.8613 | 224.7683 |
| YBR118W   | 40671.95 | 36844.19 | 38868.18 | 43067.55 | 38614.65 | 36092.5  | 0.017133 | 9767.723 | 9109.261 |
| YPR080W   | 41621.98 | 39627.78 | 41299.79 | 45290.01 | 40923.79 | 40800.73 | 0.051628 | 133061.6 | 121791.9 |
| YAR050W   | 772.6967 | 966.0971 | 823.0513 | 875.7315 | 865.3499 | 771.985  | -0.02773 | 109.0549 | 130.8222 |
| YBR298C   | 41.45616 | 42.52014 | 18.77308 | 36.71267 | 35.72017 | 22.504   | -0.11409 | 673.4422 | 582.9927 |
| YDR033W   | 12128.23 | 15008.62 | 13523.53 | 16415.94 | 16971.69 | 15244.01 | 0.258271 | 3991.185 | 4071.291 |
| YOL159C   | 0        | 0        | 0        | 0        | 0        | 0        | #DIV/0!  | 192.2514 | 205.4523 |
| YBR299W   | 152.0059 | 87.01796 | 112.6385 | 103.87   | 64.52675 | 45.008   | -0.7206  | 1986.598 | 1930.724 |
| YPL189C-1 | 1220.654 | 1238.028 | 1228.155 | 1272.407 | 1238.683 | 1155.531 | -0.00793 | 287.815  | 302.9104 |
| YFL060C   | 138.1872 | 187.8797 | 166.9816 | 171.9228 | 201.6461 | 203.5144 | 0.22705  | 0        | 1.756002 |
| YIL117C   | 114.0044 | 88.99564 | 106.7101 | 94.91569 | 108.3128 | 101.7572 | -0.02218 | 540.7775 | 553.1407 |
| YHR216W   | 305.1634 | 427.1791 | 356.6885 | 389.5125 | 374.4856 | 406.0504 | 0.103523 | 1644.818 | 1563.72  |
| YDR070C   | 2784.472 | 2913.124 | 2613.41  | 2462.435 | 2350.617 | 2071.346 | -0.27169 | 720.6619 | 710.3029 |
| YPL240C   | 3855.423 | 3850.545 | 3750.664 | 3453.677 | 2931.358 | 2891.275 | -0.30456 | 12223.14 | 11766.97 |
| YFR015C   | 2888.112 | 2905.213 | 2918.72  | 1935.922 | 2008.395 | 1964.697 | -0.56009 | 5957.546 | 6138.106 |
| YOR161C   | 1348.477 | 1636.531 | 1430.706 | 880.2087 | 990.9466 | 910.9227 | -0.66648 | 285.5665 | 292.3744 |
| YKR059W   | 13103.6  | 11861.14 | 12248.94 | 12898.68 | 12485.93 | 12725.52 | 0.034341 | 4997.413 | 4470.781 |
| YDR171W   | 3286.552 | 3210.765 | 3164.746 | 2568.096 | 2136.296 | 2104.613 | -0.50489 | 10909.99 | 10247.15 |
| YNR060W   | 447.9568 | 500.3533 | 387.3183 | 335.7866 | 331.8519 | 334.6247 | -0.41426 | 1657.185 | 1635.716 |
| YNL335W   | 130.1263 | 155.2479 | 143.2682 | 128.9421 | 134.8148 | 108.6063 | -0.20306 | 0        | 0        |
| YNL034W   | 16.12184 | 33.62057 | 26.67753 | 23.28121 | 20.74074 | 23.48243 | -0.17897 | 267.578  | 271.3023 |
| YMR015C   | 28814.33 | 35607.16 | 30080.4  | 33498.07 | 33218.6  | 31015.4  | 0.048489 | 8816.584 | 8861.665 |
| YPL095C   | 1949.591 | 2371.239 | 2028.481 | 2390.801 | 2205.432 | 1881.53  | 0.028896 | 519.4162 | 457.4386 |
| YCR021C   | 82.91232 | 85.04028 | 81.02066 | 78.79793 | 106.0082 | 98.82191 | 0.18801  | 813.9769 | 743.6669 |
| YGR079W   | 4174.405 | 4577.342 | 4475.897 | 5051.126 | 4840.659 | 4890.217 | 0.160285 | 1553.751 | 1411.826 |
| YJL034W   | 8596.395 | 8086.737 | 8718.613 | 9211.299 | 9001.482 | 9768.692 | 0.139544 | 22944.25 | 22637.5  |
| YDR119W-1 | 2684.286 | 2686.679 | 2384.181 | 2069.341 | 2183.539 | 2030.252 | -0.30367 | 474.4451 | 418.8065 |
| YOR009W   | 4040.824 | 3981.072 | 3652.846 | 4276.579 | 4535.309 | 3885.364 | 0.121126 | 1012.974 | 787.567  |
| YGL253W   | 11102.19 | 10370.96 | 11929.8  | 10373.57 | 10411.85 | 11432.03 | -0.05213 | 30180.1  | 28036.33 |
| YGR292W   | 5.7578   | 7.910723 | 10.86863 | 3.581724 | 2.304527 | 4.892174 | -1.18682 | 381.1301 | 259.8883 |
| YJL116C   | 1505.089 | 2251.59  | 1722.183 | 2038.896 | 1965.761 | 1764.118 | 0.074389 | 272.0751 | 287.9844 |
| YKR046C   | 13325.85 | 13586.67 | 12712.34 | 13441.32 | 13087.41 | 11398.76 | -0.06316 | 4548.827 | 4492.731 |
| YFR020W   | 2772.956 | 2464.19  | 2612.422 | 2568.992 | 2598.354 | 2431.41  | -0.04685 | 661.0752 | 516.2646 |
| YJL138C   | 7223.735 | 6598.532 | 7485.519 | 7924.565 | 7524.28  | 7960.545 | 0.135707 | 18936.21 | 18164.96 |
| YKR039W   | 2896.173 | 4500.213 | 3048.155 | 2698.829 | 2689.383 | 2313.02  | -0.43959 | 480.0665 | 483.7786 |
| YER188W   | 0        | 0        | 0        | 0        | 0        | 0        | #DIV/0!  | 157.3988 | 139.6022 |
| YHR092C   | 6574.256 | 6856.62  | 6769.177 | 7582.51  | 7955.227 | 7014.398 | 0.158905 | 17789.44 | 17172.82 |
| YPR193C   | 404.1975 | 473.6546 | 373.4855 | 333.9958 | 366.4198 | 334.6247 | -0.27378 | 34.8526  | 40.38805 |

|           |          |          |          |          |          |          |          |          |          |
|-----------|----------|----------|----------|----------|----------|----------|----------|----------|----------|
| YHR021W-1 | 277.5259 | 236.3329 | 234.1695 | 162.073  | 201.6461 | 161.4417 | -0.51033 | 15.73988 | 9.658012 |
| YKR013W   | 9503.824 | 8894.62  | 9378.635 | 10290.29 | 11163.13 | 10207.03 | 0.188787 | 3868.639 | 3732.383 |
| YGR043C   | 2040.564 | 2539.342 | 2050.218 | 1481.043 | 1530.206 | 1365.895 | -0.59905 | 538.5289 | 528.5566 |
| YKR104W   | 178.4918 | 123.6051 | 129.4354 | 157.5959 | 134.8148 | 117.4122 | -0.07447 | 0        | 0        |
| YHR112C   | 643.722  | 743.608  | 618.5236 | 660.8281 | 641.8108 | 645.7669 | -0.04192 | 1645.942 | 1694.542 |
| YLR205C   | 3801.299 | 4659.416 | 3685.452 | 3759.019 | 3560.494 | 3138.819 | -0.21585 | 1045.578 | 973.7032 |
| YFR057W   | 137.0356 | 118.6609 | 121.531  | 102.9746 | 145.1852 | 115.4553 | -0.05302 | 1.124277 | 1.756002 |
| YMR321C   | 472.1396 | 419.2683 | 335.9393 | 424.4343 | 376.7902 | 408.0073 | -0.02145 | 56.21387 | 46.53406 |
| YLL052C   | 606.8721 | 770.3067 | 678.795  | 933.0391 | 899.9178 | 875.6991 | 0.397755 | 120.2977 | 86.04411 |
| YNL160W   | 21238.22 | 25097.76 | 21774.8  | 21868.22 | 21676.38 | 19582.39 | -0.10963 | 7822.723 | 7780.846 |
| YDL039C   | 1768.796 | 2337.619 | 2104.561 | 2094.413 | 2002.634 | 2479.354 | 0.082478 | 268.7023 | 302.0324 |
| YFL014W   | 5892.532 | 5589.915 | 5571.652 | 3925.57  | 3865.844 | 3296.347 | -0.62115 | 646.4596 | 249.3523 |
| YJR048W   | 17006.24 | 17185.06 | 15559.92 | 17766.25 | 17933.83 | 15119.75 | 0.03066  | 6172.283 | 5189.864 |
| YHR219W   | 2.30312  | 9.888404 | 2.96417  | 7.163448 | 2.304527 | 5.870608 | 0.017305 | 140.5347 | 158.0402 |
| YKR103W   | 111.7013 | 138.4377 | 165.0055 | 142.3735 | 133.6626 | 208.4066 | 0.222713 | 0        | 0        |
| YOL083W   | 465.2302 | 429.1567 | 510.8254 | 377.8719 | 440.1646 | 395.2876 | -0.21182 | 82.07226 | 94.82412 |
| YER186C   | 719.725  | 770.3067 | 682.7473 | 635.756  | 631.4404 | 752.4163 | -0.10546 | 152.9017 | 166.8202 |
| YLL053C   | 939.6729 | 888.9675 | 829.9677 | 1309.12  | 1123.457 | 930.4914 | 0.339107 | 165.2688 | 115.8961 |
| YOR010C   | 181.9465 | 179.969  | 188.7189 | 236.3938 | 163.6214 | 167.3123 | 0.043087 | 745.396  | 674.3048 |
| YEL065W   | 366.1961 | 421.246  | 345.8199 | 222.0669 | 270.7819 | 279.8323 | -0.55254 | 1569.491 | 1758.636 |
| YMR011W   | 7799.515 | 8274.617 | 8063.532 | 4396.566 | 4345.186 | 4068.332 | -0.91401 | 13671.21 | 13566.87 |
| YML123C   | 4607.391 | 6722.137 | 5044.03  | 3657.836 | 3358.848 | 3089.897 | -0.69607 | 1550.379 | 1367.926 |
| YGL184C   | 3332.614 | 4516.034 | 3475.984 | 3293.395 | 2854.157 | 2683.846 | -0.35875 | 619.4769 | 626.8928 |
| YBR054W   | 1317.385 | 1538.636 | 1401.065 | 1635.057 | 1429.959 | 1330.671 | 0.046223 | 365.3902 | 375.7845 |
| YLR046C   | 952.3401 | 1109.479 | 943.5943 | 936.6209 | 996.7079 | 850.2598 | -0.11062 | 320.4191 | 280.0823 |
| YOL058W   | 2529.977 | 2783.586 | 2635.148 | 1989.648 | 2128.231 | 1937.301 | -0.39255 | 840.9596 | 888.5371 |
| YDR343C   | 191.1589 | 137.4488 | 153.1488 | 102.0791 | 78.35392 | 76.31791 | -0.90793 | 828.5925 | 656.7448 |
| YNL111C   | 20919.24 | 24630.04 | 21142.44 | 25861.84 | 26174.82 | 20966.88 | 0.130459 | 7540.529 | 7114.443 |
| YJL186W   | 761.1811 | 877.1015 | 842.8125 | 899.0128 | 767.4075 | 894.2893 | 0.045567 | 2224.945 | 2384.651 |
| YLR420W   | 3506.5   | 3547.959 | 3509.578 | 3761.706 | 3709.136 | 3730.772 | 0.084545 | 7536.032 | 6987.133 |
| YBR177C   | 4012.035 | 4515.045 | 4220.979 | 4205.84  | 3872.758 | 3809.046 | -0.10081 | 1677.422 | 1476.798 |
| YNL336W   | 97.88259 | 82.07376 | 55.33118 | 57.30759 | 78.35392 | 72.40417 | -0.17739 | 444.0896 | 462.7066 |
| YDR133C   | 42232.31 | 39483.41 | 38554.97 | 37559.75 | 37574.16 | 34656.16 | -0.13154 | 17517.37 | 15242.98 |
| YLR056W   | 27699.62 | 33784.72 | 28583.5  | 31854.06 | 30941.73 | 26217.16 | -0.017   | 10923.48 | 10174.28 |
| YHR022C   | 337.4071 | 363.8933 | 448.5778 | 277.5836 | 241.9753 | 274.9402 | -0.53336 | 31.47977 | 43.90005 |
| YBR069C   | 2582.949 | 3064.417 | 2881.174 | 2988.053 | 3044.28  | 3549.761 | 0.168042 | 1246.824 | 1330.172 |
| YDL248W   | 177.3402 | 160.1922 | 175.8741 | 171.0273 | 164.7737 | 170.2476 | -0.02083 | 29.23121 | 22.82803 |
| YDR258C   | 1824.071 | 1868.908 | 1908.926 | 1548.2   | 1395.391 | 1535.164 | -0.32282 | 4705.101 | 4720.134 |
| YER187W   | 449.1084 | 451.9001 | 403.1272 | 433.3886 | 492.0165 | 392.3523 | 0.014991 | 102.3093 | 93.06811 |
| YNR034W-1 | 5160.14  | 4710.836 | 5166.549 | 4046.453 | 4016.79  | 3568.351 | -0.37052 | 15426.21 | 14854.9  |
| YBR092C   | 3962.518 | 4321.233 | 3940.371 | 4812.046 | 4498.437 | 4265.975 | 0.151376 | 1950.621 | 1670.836 |
| YJR009C   | 78961.31 | 67508.14 | 73232.8  | 77641.03 | 72929.06 | 70455.13 | 0.008661 | 189353.1 | 161408.2 |
| YNL052W   | 9218.237 | 9974.433 | 8963.652 | 9493.36  | 9170.865 | 7778.556 | -0.09059 | 3860.769 | 3414.546 |
| YGR157W   | 3210.549 | 3436.221 | 3272.444 | 3800.209 | 3372.675 | 3496.926 | 0.105237 | 1509.905 | 1300.32  |
| YBR066C   | 718.5734 | 655.6012 | 658.0458 | 359.9633 | 341.07   | 364.9561 | -0.93086 | 1231.084 | 1191.447 |
| YOL165C   | 214.1901 | 131.5158 | 100.7818 | 138.7918 | 140.5761 | 178.0751 | 0.034972 | 0        | 0        |
| YFL027C   | 861.3668 | 1044.215 | 930.7495 | 861.4046 | 899.9178 | 907.9874 | -0.08756 | 287.815  | 194.9162 |
| YIL082W   | 132.4294 | 167.114  | 86.949   | 121.7786 | 114.0741 | 84.14539 | -0.27238 | 0        | 0        |
| YGR088W   | 4430.051 | 4867.073 | 4738.721 | 2718.529 | 2776.955 | 2749.402 | -0.76754 | 1443.572 | 1371.438 |
| YJL078C   | 650.6314 | 682.2999 | 725.2337 | 683.2139 | 633.7449 | 688.818  | -0.0372  | 1541.384 | 1669.958 |
| YML075C   | 14632.87 | 17569.72 | 15876.1  | 18230.98 | 18826.83 | 20132.27 | 0.250367 | 7315.674 | 7587.685 |
| YML131W   | 291.3447 | 346.0942 | 320.1304 | 372.4993 | 251.1934 | 275.9186 | -0.09007 | 1164.751 | 1027.261 |
| YHR137W   | 1657.095 | 2056.788 | 1753.801 | 1812.352 | 2002.634 | 1662.361 | 0.002547 | 644.211  | 698.0109 |
| YKL163W   | 1573.031 | 2293.121 | 1886.2   | 1742.509 | 1488.724 | 1325.779 | -0.33606 | 366.5145 | 356.4684 |

|         |          |          |          |          |          |          |          |          |          |
|---------|----------|----------|----------|----------|----------|----------|----------|----------|----------|
| YJL185C | 650.6314 | 630.8802 | 516.7537 | 551.5855 | 530.0412 | 613.4786 | -0.08523 | 154.026  | 181.7462 |
| YPL277C | 66.79048 | 85.04028 | 83.98483 | 111.9289 | 110.6173 | 117.4122 | 0.527699 | 338.4075 | 403.0025 |
| YDR502C | 22212.44 | 27143.67 | 23384.34 | 26542.37 | 25870.62 | 24118.42 | 0.073294 | 8632.202 | 8903.809 |
| YLR036C | 62.18424 | 43.50898 | 34.58199 | 25.9675  | 24.19753 | 15.65496 | -1.09166 | 273.1994 | 289.7404 |
| YER079W | 525.1113 | 448.9336 | 467.3509 | 385.9308 | 331.8519 | 328.7541 | -0.46184 | 1282.801 | 1403.046 |
| YLR228C | 452.5631 | 440.034  | 496.0045 | 412.7937 | 404.4445 | 485.3036 | -0.0923  | 1077.058 | 1322.27  |
| YPL028W | 25980.34 | 31007.07 | 26250.69 | 29740.85 | 28958.69 | 25486.27 | 0.016333 | 12155.69 | 11197.15 |
| YLR460C | 78.30608 | 47.46434 | 43.4745  | 89.5431  | 96.79013 | 82.18852 | 0.665926 | 0        | 0        |
| YML066C | 70.24516 | 98.88404 | 86.949   | 89.5431  | 95.63787 | 86.10225 | 0.083215 | 414.8584 | 343.2984 |
| YHL040C | 325.8915 | 494.4202 | 386.3302 | 393.9897 | 409.0535 | 445.1878 | 0.048887 | 1573.988 | 1627.814 |
| YPR010C | 3117.273 | 3236.475 | 2993.812 | 2910.151 | 3165.268 | 2558.607 | -0.11456 | 1280.552 | 1268.712 |
| YHL044W | 13.81872 | 23.73217 | 25.68948 | 11.6406  | 4.609054 | 7.827478 | -1.39318 | 125.9191 | 110.6281 |
| YMR195W | 895.9136 | 779.2063 | 827.0036 | 385.9308 | 369.8766 | 303.3148 | -1.24028 | 2020.327 | 1727.028 |
| YCL069W | 81.76076 | 79.10723 | 52.36701 | 79.69336 | 77.20165 | 67.512   | 0.073673 | 0        | 1.756002 |
| YDR453C | 1236.775 | 1300.325 | 1292.378 | 1183.76  | 1134.98  | 1138.898 | -0.14736 | 538.5289 | 523.2886 |
| YLR367W | 6408.431 | 5610.681 | 5632.912 | 5443.325 | 5745.186 | 5017.413 | -0.12331 | 2841.049 | 2353.921 |
| YBR145W | 275.2228 | 315.4401 | 262.8231 | 290.1197 | 271.9342 | 238.7381 | -0.09194 | 836.4624 | 742.7889 |
| YDR492W | 7395.318 | 9368.274 | 7719.688 | 9394.862 | 9087.902 | 7537.861 | 0.087859 | 2600.454 | 2519.863 |
| YOR065W | 6571.953 | 7826.672 | 6851.186 | 6743.491 | 7062.223 | 6287.421 | -0.08075 | 3023.182 | 3197.68  |
| YKR018C | 1044.465 | 929.51   | 1042.4   | 981.3924 | 913.7449 | 1004.852 | -0.05677 | 2102.399 | 2208.173 |
| YOR317W | 5983.505 | 7665.491 | 6798.819 | 6353.083 | 5957.202 | 5881.371 | -0.16867 | 2842.173 | 2921.11  |
| YKR105C | 57.578   | 63.28579 | 51.37895 | 50.14414 | 71.44034 | 54.79234 | 0.034218 | 0        | 0        |
| YHL021C | 1430.237 | 1347.79  | 1522.596 | 781.7113 | 738.6009 | 818.9499 | -0.87849 | 2291.278 | 2341.629 |
| YPR151C | 153.1575 | 181.9466 | 165.0055 | 105.6609 | 126.749  | 113.4984 | -0.53185 | 16.86416 | 17.56002 |
| YLR413W | 7298.587 | 7427.18  | 7685.106 | 7244.037 | 7584.198 | 8557.39  | 0.061423 | 14524.54 | 15465.99 |
| YMR244W | 251.0401 | 353.016  | 280.6081 | 359.9633 | 334.1564 | 277.8755 | 0.135819 | 31.47977 | 45.65606 |
| YOR209C | 2401.002 | 2310.92  | 2438.524 | 2442.736 | 2418.601 | 2561.542 | 0.053945 | 4897.353 | 4338.203 |
| YNL074C | 811.8498 | 751.5187 | 862.5736 | 748.5803 | 772.0165 | 887.4403 | -0.01069 | 1768.488 | 1880.678 |
| YGR182C | 2870.839 | 2450.347 | 2424.691 | 2510.789 | 2492.346 | 2186.802 | -0.10745 | 1143.39  | 1098.379 |
| YPL117C | 8651.67  | 9590.763 | 8421.208 | 9179.063 | 9047.573 | 8838.201 | 0.021546 | 4545.454 | 4239.867 |
| YLL056C | 1180.349 | 1490.183 | 1092.791 | 1220.472 | 1087.737 | 816.993  | -0.26806 | 288.9393 | 199.3062 |
| YNL280C | 4352.897 | 5350.616 | 4350.414 | 4950.838 | 4799.177 | 4261.083 | -0.0044  | 2028.197 | 1857.85  |
| YPR009W | 659.8438 | 597.2596 | 616.5475 | 638.4423 | 603.7861 | 544.0097 | -0.06893 | 1326.647 | 1399.534 |
| YER103W | 631.0548 | 753.4964 | 736.1023 | 682.3184 | 581.8931 | 646.7453 | -0.15021 | 2881.523 | 2605.029 |
| YGR049W | 19675.55 | 21940.39 | 19416.3  | 22544.27 | 22103.87 | 17599.11 | 0.028438 | 7194.252 | 6999.425 |
| YBR214W | 2363.001 | 2186.326 | 2239.925 | 1507.01  | 1570.535 | 1361.003 | -0.61316 | 3710.116 | 3750.821 |
| YEL039C | 5092.198 | 4635.684 | 4662.64  | 3664.999 | 3618.107 | 3379.514 | -0.43256 | 2079.913 | 1756.002 |
| YJL079C | 3879.605 | 4634.695 | 3605.419 | 3775.137 | 3841.646 | 2995.967 | -0.19156 | 1249.072 | 1180.911 |
| YJL196C | 6295.578 | 7135.473 | 6485.605 | 6493.666 | 6411.194 | 5529.135 | -0.11161 | 2509.387 | 2131.787 |
| YCR005C | 663.2985 | 856.3358 | 675.8309 | 470.1013 | 364.1153 | 293.5304 | -0.96108 | 1862.928 | 1612.01  |
| YKL104C | 2280.089 | 2256.534 | 2318.969 | 2466.912 | 2386.338 | 2756.251 | 0.150521 | 4521.844 | 4548.924 |
| YLL012W | 4473.81  | 5993.362 | 4844.443 | 5499.737 | 5513.581 | 5017.413 | 0.066214 | 2070.919 | 1878.922 |
| YOR142W | 4280.348 | 4211.471 | 4272.358 | 3795.732 | 3759.836 | 3810.025 | -0.16743 | 2302.52  | 2123.885 |
| YOR154W | 1020.282 | 984.8851 | 1120.456 | 1255.394 | 1268.642 | 1393.291 | 0.325726 | 465.4509 | 524.1666 |
| YNR043W | 12683.28 | 13367.14 | 12105.67 | 13282.82 | 13680.82 | 13326.28 | 0.078506 | 6990.757 | 6394.482 |
| YGL261C | 1.15156  | 5.933043 | 1.976114 | 6.268017 | 1.152263 | 7.827478 | 0.7509   | 75.32659 | 64.97208 |
| YGR183C | 4532.54  | 4684.137 | 4182.445 | 4228.225 | 4407.408 | 3848.184 | -0.10208 | 2079.913 | 1875.41  |
| YOR049C | 725.4828 | 950.2757 | 772.6604 | 683.2139 | 512.7572 | 427.576  | -0.5927  | 146.1561 | 129.9442 |
| YGL187C | 5525.185 | 5843.058 | 5083.552 | 5527.496 | 5316.544 | 4720.947 | -0.07994 | 2809.569 | 2757.801 |
| YHR211W | 90.97324 | 62.29695 | 60.27147 | 35.81724 | 53.00412 | 55.77078 | -0.56253 | 243.9682 | 262.5223 |
| YKL220C | 102.4888 | 97.8952  | 97.81763 | 102.9746 | 102.5514 | 108.6063 | 0.075084 | 373.2601 | 363.4924 |
| YGR180C | 10486.1  | 9739.089 | 9735.324 | 9558.726 | 9457.779 | 9440.917 | -0.07426 | 18725.97 | 16188.58 |
| YLR038C | 4108.766 | 3958.328 | 4022.379 | 3836.027 | 4271.441 | 3771.866 | -0.0253  | 2168.731 | 1755.124 |
| YDR441C | 315.5274 | 383.6701 | 369.5333 | 312.5054 | 276.5432 | 254.393  | -0.34154 | 1025.341 | 874.4891 |



|         |          |          |          |          |          |          |          |          |          |
|---------|----------|----------|----------|----------|----------|----------|----------|----------|----------|
| YGL263W | 528.566  | 432.1233 | 533.5507 | 537.2586 | 487.4074 | 485.3036 | 0.015108 | 145.0318 | 153.6502 |
| YMR256C | 2075.111 | 1996.469 | 1766.646 | 1857.124 | 1978.436 | 1800.32  | -0.05089 | 983.7428 | 863.0751 |
| YPL279C | 127.8232 | 142.393  | 111.6504 | 203.2628 | 187.8189 | 153.6143 | 0.512383 | 17.98844 | 24.58403 |
| YDL181W | 2558.766 | 2128.973 | 2279.447 | 2160.675 | 1998.025 | 1905.991 | -0.20014 | 1223.214 | 1050.089 |
| YPR127W | 1741.159 | 1975.703 | 1636.222 | 1874.137 | 1756.05  | 1582.129 | -0.03845 | 849.9538 | 777.909  |
| YHL035C | 232.6151 | 248.1989 | 177.8502 | 181.7725 | 221.2346 | 265.1558 | 0.020657 | 894.9249 | 1033.407 |
| YDR077W | 39617.12 | 44035.04 | 42135.68 | 37306.34 | 38162.97 | 39054.22 | -0.13535 | 71156.65 | 74148.95 |
| YCR102C | 82.91232 | 93.93984 | 102.7579 | 117.3015 | 137.1194 | 98.82191 | 0.337244 | 365.3902 | 289.7404 |
| YLR231C | 1009.918 | 1136.178 | 1100.695 | 1032.432 | 1007.078 | 822.8636 | -0.1818  | 338.4075 | 346.8104 |
| YMR006C | 4887.22  | 5162.736 | 5178.406 | 5678.824 | 5757.861 | 5169.071 | 0.124923 | 8502.911 | 8641.287 |
| YML125C | 2250.148 | 2103.264 | 2110.489 | 2546.606 | 2422.058 | 2129.074 | 0.134954 | 4900.726 | 4226.697 |
| YLR010C | 515.8989 | 421.246  | 513.7895 | 469.2059 | 453.9918 | 429.5328 | -0.10111 | 96.68786 | 64.97208 |
| YDL174C | 4464.598 | 5442.578 | 4463.053 | 4404.625 | 4403.951 | 3666.195 | -0.20407 | 2043.936 | 2123.007 |
| YBR300C | 6.90936  | 2.966521 | 0        | 2.686293 | 0        | 0        | -1.87829 | 65.20809 | 60.58207 |
| YOR238W | 780.7576 | 701.0879 | 636.3086 | 721.7174 | 679.8354 | 635.9826 | -0.05598 | 251.8382 | 280.9603 |
| YDR497C | 6201.15  | 6329.568 | 6579.47  | 6653.053 | 6793.745 | 6571.168 | 0.066953 | 3296.382 | 3472.494 |
| YHR205W | 1490.119 | 1336.912 | 1263.725 | 1457.762 | 1335.473 | 1367.852 | 0.024593 | 2803.948 | 2678.781 |
| YJR155W | 839.4872 | 1014.55  | 758.8276 | 757.5346 | 588.8066 | 601.7373 | -0.42358 | 229.3526 | 177.3562 |
| YEL040W | 5549.367 | 5557.283 | 5740.61  | 5792.543 | 6040.165 | 5550.66  | 0.045194 | 9853.168 | 10344.61 |
| YDL223C | 976.5228 | 1007.628 | 1132.313 | 725.2991 | 807.7367 | 1060.623 | -0.26492 | 282.1936 | 327.4944 |
| YMR175W | 87.51856 | 93.93984 | 79.04455 | 98.49741 | 67.98354 | 73.3826  | -0.11909 | 5.621387 | 8.780011 |
| YMR134W | 2060.141 | 2100.297 | 1827.905 | 1895.627 | 1991.111 | 1652.576 | -0.11245 | 767.8815 | 813.907  |
| YGL158W | 48.36552 | 42.52014 | 51.37895 | 17.90862 | 23.04527 | 52.83547 | -0.60108 | 299.0578 | 353.8344 |
| YGL039W | 458.3209 | 538.918  | 526.6343 | 631.2789 | 493.1688 | 519.5488 | 0.109464 | 1192.858 | 1136.133 |
| YOL143C | 4165.192 | 3502.473 | 4020.403 | 3891.543 | 3855.474 | 3420.608 | -0.06571 | 9763.226 | 8095.17  |
| YML126C | 22101.89 | 25522.96 | 22343.92 | 25852.88 | 27108.15 | 25452.02 | 0.164383 | 12514.33 | 12046.17 |
| YPL278C | 39.15304 | 44.49782 | 38.53422 | 40.2944  | 24.19753 | 21.52556 | -0.50637 | 266.4538 | 192.2822 |
| YLR265C | 718.5734 | 638.7909 | 705.4726 | 624.1154 | 720.1647 | 658.4866 | -0.04264 | 281.0694 | 265.1563 |
| YDL110C | 5562.035 | 5832.181 | 5505.453 | 4532.672 | 4507.655 | 4117.253 | -0.3611  | 2723     | 2573.421 |
| YJL026W | 6650.259 | 6188.163 | 6420.393 | 6175.788 | 6073.581 | 5870.608 | -0.08794 | 11203.43 | 9734.398 |
| YDR040C | 80.6092  | 74.16303 | 60.27147 | 77.00707 | 54.15638 | 62.61982 | -0.15019 | 2.248555 | 7.024009 |
| YNR014W | 422.6225 | 385.6478 | 337.9154 | 246.2435 | 203.9506 | 146.7652 | -0.94114 | 972.5    | 989.5072 |
| YGL101W | 2325     | 2276.311 | 2191.51  | 2239.473 | 2268.807 | 2454.893 | 0.035734 | 1162.503 | 905.2191 |
| YHR140W | 238.3729 | 160.1922 | 169.9458 | 141.4781 | 134.8148 | 154.5927 | -0.39988 | 23.60983 | 22.82803 |
| YFL067W | 41.45616 | 49.44202 | 46.43867 | 34.02638 | 62.22223 | 58.70608 | 0.174128 | 0        | 0        |
| YML008C | 22279.23 | 23948.73 | 21675    | 24210.66 | 23808.07 | 21979.56 | 0.043845 | 13023.63 | 12110.27 |
| YNL194C | 153.1575 | 213.5895 | 198.5994 | 127.1512 | 81.81071 | 90.99443 | -0.91438 | 680.1879 | 604.9427 |
| YPL091W | 2571.433 | 2741.066 | 2578.828 | 2514.37  | 2538.436 | 2600.679 | -0.04415 | 4986.171 | 4481.317 |
| YCR012W | 26910.8  | 28801.96 | 31184.06 | 28623.35 | 28122.14 | 30958.65 | 0.013342 | 57339.28 | 52392.96 |
| YBR230C | 1645.579 | 1418.986 | 1491.966 | 898.1173 | 955.2264 | 881.5697 | -0.73644 | 738.6503 | 731.3749 |
| YFL034C | 3215.155 | 3254.274 | 2979.979 | 3438.455 | 3371.523 | 2590.895 | -0.00743 | 1468.306 | 1388.998 |
| YHR120W | 1081.315 | 1172.765 | 1146.146 | 1227.636 | 1282.469 | 1394.269 | 0.199461 | 590.2457 | 568.0667 |
| YLL063C | 33.39524 | 51.4197  | 27.66559 | 34.92181 | 29.95885 | 29.35304 | -0.25536 | 179.8844 | 198.4282 |
| YLR030W | 209.5839 | 212.6007 | 225.277  | 203.2628 | 207.4074 | 188.8379 | -0.11102 | 52.84104 | 47.41206 |
| YOR032C | 259.101  | 284.786  | 236.1456 | 241.7664 | 186.6667 | 234.8243 | -0.23397 | 503.6763 | 575.9687 |
| YDL234C | 485.9583 | 421.246  | 480.1956 | 486.219  | 410.2058 | 372.7836 | -0.12845 | 1035.46  | 1146.669 |
| YOL118C | 194.6136 | 209.6342 | 140.3041 | 182.6679 | 164.7737 | 131.1103 | -0.18639 | 31.47977 | 24.58403 |
| YIR030C | 116.3076 | 89.98448 | 108.6863 | 93.12483 | 107.1605 | 69.46886 | -0.22361 | 13.49133 | 8.780011 |
| YLR395C | 4002.822 | 4580.309 | 4187.385 | 4161.963 | 4431.605 | 3939.178 | -0.02711 | 2658.916 | 2330.215 |
| YPL134C | 1134.287 | 1191.553 | 1063.149 | 989.4513 | 988.6421 | 862.001  | -0.25492 | 523.9133 | 446.0245 |
| YLR216C | 2212.147 | 1881.763 | 2035.397 | 2000.393 | 1955.391 | 1853.155 | -0.07745 | 4167.697 | 3829.841 |
| YJL141C | 596.508  | 507.2751 | 632.3564 | 429.8069 | 412.5103 | 444.2094 | -0.4324  | 1184.988 | 1259.054 |
| YHR027C | 2846.656 | 3041.673 | 2981.955 | 2818.817 | 3069.63  | 3397.125 | 0.06601  | 5164.931 | 5472.581 |
| YOL155C | 6766.566 | 6743.892 | 6749.416 | 7008.539 | 7308.807 | 7457.629 | 0.104046 | 5306.59  | 4987.924 |

|           |          |          |          |          |          |          |          |          |          |
|-----------|----------|----------|----------|----------|----------|----------|----------|----------|----------|
| YDR534C   | 101.3373 | 145.3595 | 130.4235 | 62.68017 | 91.02881 | 64.57669 | -0.78881 | 558.7659 | 586.5047 |
| YIRO16W   | 1319.688 | 1221.218 | 1209.382 | 955.4249 | 876.8725 | 805.2518 | -0.5078  | 2700.515 | 2283.681 |
| YFR047C   | 529.7176 | 490.4649 | 493.0404 | 422.6434 | 396.3786 | 335.6031 | -0.3902  | 1163.627 | 966.6792 |
| YBR117C   | 447.9568 | 638.7909 | 528.6104 | 412.7937 | 462.0577 | 453.9937 | -0.28168 | 143.9075 | 134.3342 |
| YOR178C   | 259.101  | 233.3663 | 203.5397 | 146.8507 | 140.5761 | 186.881  | -0.55328 | 543.026  | 655.8668 |
| YMR041C   | 584.9924 | 578.4717 | 572.0849 | 556.0627 | 580.7408 | 547.9234 | -0.04288 | 222.6069 | 228.2803 |
| YOL091W   | 35.69836 | 42.52014 | 55.33118 | 62.68017 | 41.48148 | 64.57669 | 0.337411 | 186.6301 | 189.6482 |
| YJL036W   | 530.8691 | 562.6502 | 581.9655 | 516.6637 | 448.2305 | 503.8939 | -0.18995 | 945.5174 | 1169.497 |
| YFL061W   | 0        | 0        | 0        | 1.790862 | 0        | 0        | #DIV/0!  | 42.72254 | 34.24204 |
| YCL030C   | 1936.924 | 2095.353 | 1999.827 | 1705.796 | 1858.601 | 1862.94  | -0.15242 | 2893.89  | 2701.609 |
| YGR060W   | 29297.99 | 35613.09 | 30469.7  | 35032.84 | 35301.9  | 30917.56 | 0.086184 | 16824.81 | 16421.25 |
| YLR437C   | 1347.325 | 1191.553 | 1261.749 | 1333.297 | 1199.506 | 1014.637 | -0.09946 | 2775.841 | 2545.325 |
| YKL150W   | 5299.479 | 4954.091 | 5011.424 | 4783.393 | 4923.622 | 4386.323 | -0.11521 | 3304.252 | 2847.357 |
| YOL016C   | 1022.585 | 1170.787 | 921.857  | 842.6006 | 536.9548 | 655.5513 | -0.61423 | 2185.595 | 2401.333 |
| YFR007W   | 753.1202 | 874.1349 | 752.8993 | 778.1296 | 717.8601 | 741.6535 | -0.08908 | 332.7861 | 320.4704 |
| YML133C   | 1.15156  | 0        | 2.96417  | 3.581724 | 4.609054 | 0        | 0.992852 | 35.97688 | 51.80206 |
| YHR001W-f | 2445.913 | 2840.939 | 2192.498 | 2191.12  | 2336.79  | 1969.589 | -0.20303 | 1134.396 | 880.6351 |
| YCR100C   | 29.94056 | 26.69869 | 21.73725 | 22.38578 | 35.72017 | 29.35304 | 0.158185 | 84.32081 | 98.33612 |
| YHR051W   | 3819.724 | 4091.822 | 3683.476 | 3964.073 | 3846.255 | 3434.306 | -0.04427 | 2391.338 | 1976.38  |
| YGL051W   | 9.21248  | 16.81029 | 12.84474 | 8.058879 | 16.13169 | 14.67652 | -1.5E-05 | 131.5405 | 84.2881  |
| YEL070W   | 39.15304 | 49.44202 | 46.43867 | 13.43147 | 19.58848 | 41.09426 | -0.8655  | 186.6301 | 268.6683 |
| YCR091W   | 203.8261 | 201.7234 | 185.7547 | 181.7725 | 195.8848 | 203.5144 | -0.02494 | 499.1792 | 676.9388 |
| YNR075C-f | 0        | 3.955362 | 0        | 7.163448 | 1.152263 | 1.956869 | 1.376917 | 44.9711  | 34.24204 |
| YFL058W   | 66.79048 | 82.07376 | 49.40284 | 42.98069 | 41.48148 | 54.79234 | -0.50972 | 2.248555 | 3.512004 |
| YLR031W   | 195.7652 | 200.7346 | 177.8502 | 169.2365 | 137.1194 | 157.528  | -0.30817 | 52.84104 | 45.65606 |
| YLR149C   | 163.5215 | 173.0471 | 195.6353 | 93.12483 | 108.3128 | 86.10225 | -0.88822 | 365.3902 | 478.5106 |
| YMR145C   | 5138.26  | 6100.157 | 5503.477 | 5457.652 | 5685.268 | 5299.202 | -0.02607 | 3695.5   | 3724.481 |
| YJR145C   | 42965.85 | 38099.03 | 40922.35 | 43802.69 | 41362.8  | 40412.29 | 0.041851 | 27540.3  | 24370.68 |
| YML051W   | 810.6982 | 865.2354 | 877.3945 | 904.3853 | 816.9548 | 800.3596 | -0.01798 | 1470.555 | 1495.236 |
| YJR091C   | 794.5764 | 867.2131 | 1027.579 | 789.7702 | 770.8643 | 1239.677 | 0.05832  | 2289.029 | 3098.466 |
| YML004C   | 2958.357 | 2948.722 | 3069.893 | 2574.364 | 2636.379 | 2499.901 | -0.21938 | 5595.529 | 4694.672 |
| YDL124W   | 1716.976 | 1659.274 | 1640.174 | 1399.559 | 1370.041 | 1330.671 | -0.29094 | 3309.873 | 2885.99  |
| YER053C-f | 1546.545 | 2280.266 | 1562.118 | 2074.714 | 2098.272 | 1605.611 | 0.100721 | 491.3093 | 470.6086 |
| YBR151W   | 2498.885 | 2372.228 | 2393.074 | 2333.493 | 2264.198 | 2179.953 | -0.10002 | 4039.529 | 3988.759 |
| YIRO27C   | 224.5542 | 312.4736 | 216.3844 | 196.0994 | 238.5185 | 120.3475 | -0.44104 | 47.21965 | 24.58403 |
| YPL247C   | 884.398  | 982.9074 | 874.4303 | 719.9265 | 666.0083 | 594.8883 | -0.46899 | 1425.584 | 1619.034 |
| YHL043W   | 158.9153 | 265.0092 | 208.48   | 205.0537 | 229.3004 | 189.8163 | -0.01891 | 555.3931 | 572.4567 |
| YGL001C   | 8940.711 | 9790.509 | 8496.301 | 9215.776 | 9544.198 | 7919.451 | -0.02934 | 4708.474 | 4083.583 |
| YBR301W   | 0        | 0        | 0        | 0        | 0        | 0        | #DIV/0!  | 24.7341  | 26.34003 |
| YBR105C   | 1260.958 | 1389.321 | 1257.796 | 1036.909 | 883.7861 | 912.8796 | -0.46383 | 474.4451 | 489.0466 |
| YLR300W   | 14442.86 | 16158.64 | 15403.81 | 17843.25 | 17364.61 | 16576.64 | 0.17072  | 8398.353 | 8475.344 |
| YNL098C   | 7170.764 | 6916.939 | 6974.693 | 6591.268 | 6244.116 | 5874.522 | -0.17087 | 4276.752 | 4086.217 |
| YGL055W   | 35833.09 | 45093.1  | 39759.41 | 42853.54 | 45631.94 | 47391.46 | 0.171047 | 21947.02 | 21123.83 |
| YOR107W   | 631.0548 | 699.1102 | 734.1262 | 835.4371 | 783.5392 | 842.4323 | 0.253838 | 248.4653 | 309.9344 |
| YKL110C   | 1305.869 | 1316.147 | 1298.307 | 1477.461 | 1594.733 | 1419.709 | 0.196354 | 2314.887 | 2563.763 |
| YDL210W   | 100.1857 | 134.4823 | 92.87734 | 55.51672 | 69.13581 | 51.85704 | -0.89195 | 8.99422  | 10.53601 |
| YJL214W   | 123.2169 | 200.7346 | 183.7786 | 175.5045 | 163.6214 | 209.385  | 0.111459 | 25.85838 | 44.77805 |
| YHL032C   | 806.092  | 826.6706 | 778.5888 | 683.2139 | 699.4239 | 708.3867 | -0.20563 | 1308.659 | 1408.314 |
| YMR090W   | 4241.195 | 3615.201 | 3856.386 | 3707.98  | 3805.926 | 3524.322 | -0.08558 | 2475.659 | 2133.543 |
| YCL027W   | 345.468  | 315.4401 | 340.8796 | 285.6425 | 358.3539 | 302.3363 | -0.08216 | 693.6792 | 834.979  |
| YDL079C   | 335.1039 | 353.016  | 331.9871 | 207.74   | 226.9959 | 203.5144 | -0.67653 | 658.8266 | 619.8688 |
| YER134C   | 183.098  | 187.8797 | 201.5636 | 186.2497 | 191.2757 | 173.1829 | -0.05609 | 476.6937 | 462.7066 |
| YGR244C   | 5293.721 | 5078.684 | 4928.427 | 4555.953 | 4377.449 | 4541.894 | -0.18329 | 3145.728 | 2957.108 |
| YNR018W   | 9970.206 | 9615.484 | 9666.16  | 12152.79 | 11012.18 | 9877.298 | 0.175785 | 6274.593 | 6008.161 |

|           |          |          |          |          |          |          |          |          |          |
|-----------|----------|----------|----------|----------|----------|----------|----------|----------|----------|
| YDR047W   | 4318.35  | 4784.999 | 4434.399 | 4553.267 | 4573.334 | 4186.722 | -0.02412 | 2679.153 | 2592.737 |
| YGL255W   | 10709.51 | 12118.24 | 10902.22 | 10426.4  | 10688.4  | 9031.931 | -0.16203 | 5756.301 | 5472.581 |
| YNL134C   | 4394.353 | 4843.34  | 4224.931 | 4488.796 | 4360.165 | 3827.637 | -0.08679 | 2359.858 | 2263.487 |
| YDL037C   | 208.4323 | 345.1053 | 462.4106 | 397.5714 | 347.9836 | 680.9906 | 0.489699 | 13.49133 | 36.87605 |
| YNL195C   | 647.1767 | 787.117  | 715.3531 | 566.8078 | 533.498  | 455.9506 | -0.46602 | 301.3064 | 274.8143 |
| YOL151W   | 772.6967 | 880.068  | 863.5617 | 744.1032 | 732.8396 | 751.4379 | -0.17532 | 422.7283 | 298.5204 |
| YGR175C   | 25416.08 | 30286.2  | 27976.83 | 30700.75 | 29766.42 | 29309.99 | 0.101481 | 14938.27 | 14912.85 |
| YLR153C   | 19506.27 | 23675.81 | 21425.02 | 23686.84 | 24129.55 | 25052.82 | 0.173616 | 12488.47 | 11854.77 |
| YPL141C   | 323.5883 | 376.7482 | 360.6407 | 290.1197 | 379.0947 | 411.921  | 0.027153 | 684.685  | 971.9472 |
| YGR249W   | 209.5839 | 232.3775 | 307.2857 | 168.341  | 197.0371 | 204.4929 | -0.39481 | 498.0549 | 627.7708 |
| YER143W   | 632.2064 | 663.5119 | 658.0458 | 568.5987 | 583.0453 | 573.3627 | -0.17965 | 1119.78  | 1024.627 |
| YHR190W   | 8787.554 | 9855.773 | 9064.433 | 9782.584 | 10093.83 | 9198.265 | 0.069473 | 5606.772 | 5523.505 |
| YMR202W   | 22432.39 | 20910.02 | 21076.24 | 25250.26 | 25232.27 | 23694.75 | 0.203499 | 16484.16 | 14024.31 |
| YHL042W   | 180.7949 | 150.3037 | 134.3757 | 131.6284 | 153.251  | 139.9162 | -0.13193 | 422.7283 | 331.8844 |
| YPL220W   | 6203.453 | 4316.288 | 5593.39  | 6333.384 | 5434.075 | 4895.109 | 0.048374 | 15269.94 | 12477.27 |
| YKR091W   | 442.199  | 411.3576 | 414.9839 | 383.2445 | 376.7902 | 364.9561 | -0.17326 | 698.1763 | 652.3548 |
| YKL145W   | 2814.412 | 2995.198 | 3130.164 | 2931.641 | 2994.733 | 3398.104 | 0.060785 | 4727.587 | 4872.028 |
| YHR033W   | 953.4916 | 1111.457 | 903.0839 | 505.0231 | 425.1852 | 463.7781 | -1.09029 | 363.1416 | 360.8584 |
| YMR186W   | 22373.66 | 18612.94 | 22197.68 | 21455.42 | 20630.13 | 25145.77 | 0.089568 | 43218.35 | 41088.69 |
| YNR047W   | 1020.282 | 930.4988 | 1188.632 | 989.4513 | 977.1194 | 1486.242 | 0.137277 | 373.2601 | 392.4665 |
| YMR220W   | 4356.351 | 5022.321 | 4387.96  | 4874.727 | 4872.922 | 4659.306 | 0.06559  | 2874.778 | 2607.663 |
| YKR011C   | 755.4233 | 714.9316 | 770.6843 | 598.1479 | 501.2346 | 577.2765 | -0.41858 | 1279.428 | 1247.64  |
| YLL039C   | 2645.133 | 2649.104 | 2343.671 | 2248.427 | 1836.708 | 1881.53  | -0.35625 | 4858.003 | 4289.035 |
| YPL009C   | 1355.386 | 1257.805 | 1484.061 | 1398.663 | 1432.263 | 1580.172 | 0.106481 | 2170.98  | 2408.357 |
| YNL040W   | 700.1484 | 647.6905 | 553.3118 | 653.6646 | 638.354  | 746.5457 | 0.100681 | 272.0751 | 244.9623 |
| YGR095C   | 1630.609 | 1504.026 | 1627.33  | 1883.987 | 1765.268 | 1557.668 | 0.128874 | 959.0087 | 962.2892 |
| YNL007C   | 2677.377 | 2964.544 | 2255.734 | 2243.055 | 1905.844 | 1660.404 | -0.44306 | 4778.179 | 5117.868 |
| YHR044C   | 82.91232 | 103.8282 | 91.88928 | 120.8832 | 96.79013 | 93.92973 | 0.16136  | 476.6937 | 316.9584 |
| YHR039C   | 7622.175 | 9848.851 | 8366.865 | 9443.216 | 9912.923 | 9321.548 | 0.15044  | 4508.353 | 4712.232 |
| YKL065W-1 | 126.6716 | 148.3261 | 112.6385 | 98.49741 | 117.5309 | 118.3906 | -0.21305 | 35.97688 | 20.19402 |
| YIR018W   | 399.5913 | 466.7327 | 380.4019 | 350.1135 | 236.214  | 247.544  | -0.58025 | 857.8237 | 794.591  |
| YCL050C   | 4503.751 | 3913.83  | 4310.892 | 4079.584 | 4219.589 | 4063.439 | -0.04208 | 7138.038 | 6497.208 |
| YCL035C   | 3147.213 | 2734.144 | 2947.374 | 2971.936 | 3068.478 | 2648.623 | -0.02301 | 6565.78  | 5914.215 |
| YJR150C   | 2321.545 | 2076.565 | 2236.961 | 3109.832 | 3249.383 | 2565.456 | 0.427687 | 962.3815 | 943.8512 |
| YLR134W   | 878.6402 | 888.9675 | 800.326  | 1082.576 | 1164.938 | 1024.421 | 0.349536 | 601.4885 | 461.8286 |
| YBR045C   | 47.21396 | 65.26347 | 59.28341 | 68.05276 | 59.9177  | 70.4473  | 0.20814  | 183.2572 | 201.9402 |
| YFR033C   | 11368.2  | 10934.6  | 10373.61 | 11218.86 | 10868.15 | 9334.267 | -0.05651 | 7136.913 | 6498.964 |
| YPL223C   | 354.6805 | 535.9515 | 368.5452 | 328.6232 | 292.6749 | 201.5576 | -0.61377 | 109.0549 | 69.36208 |
| YFL054C   | 105.9435 | 127.5604 | 173.898  | 119.9878 | 115.2263 | 105.6709 | -0.25717 | 377.7572 | 402.1245 |
| YLR177W   | 659.8438 | 505.2975 | 629.3922 | 461.147  | 394.0741 | 368.8699 | -0.5519  | 991.6127 | 1027.261 |
| YOR054C   | 213.0386 | 220.5114 | 257.8828 | 170.1319 | 191.2757 | 199.6007 | -0.30157 | 418.2312 | 434.6105 |
| YDR529C   | 7753.453 | 7963.132 | 7862.956 | 8135.886 | 7693.663 | 7080.932 | -0.04153 | 5804.645 | 5253.08  |
| YER062C   | 12290.6  | 13277.16 | 12974.17 | 10234.78 | 9866.832 | 9106.292 | -0.40007 | 7212.24  | 6491.062 |
| YEL024W   | 3400.557 | 4346.943 | 3925.55  | 3615.75  | 3490.206 | 3196.546 | -0.18019 | 2251.928 | 1980.77  |
| YJL171C   | 1218.35  | 1315.158 | 1005.842 | 1173.91  | 1113.087 | 1103.674 | -0.06191 | 2580.217 | 2141.445 |
| YAR066W   | 6.90936  | 1.977681 | 4.940284 | 0.895431 | 5.761317 | 3.913739 | -0.38748 | 24.7341  | 28.97404 |
| YLL010C   | 701.3    | 993.7846 | 887.275  | 836.3326 | 853.8272 | 832.6479 | -0.03366 | 351.8989 | 420.5625 |
| YER004W   | 1532.726 | 1714.649 | 1437.623 | 1201.668 | 1488.724 | 1311.103 | -0.22751 | 2718.503 | 2543.569 |
| YMR272C   | 7321.618 | 8287.472 | 7044.845 | 7523.411 | 7427.49  | 6546.707 | -0.07559 | 4235.153 | 4003.685 |
| YIL029C   | 206.1292 | 223.4779 | 191.683  | 168.341  | 186.6667 | 143.8299 | -0.3167  | 71.95376 | 85.1661  |
| YDL021W   | 575.78   | 490.4649 | 499.9568 | 356.3815 | 320.3292 | 347.3443 | -0.61298 | 1122.029 | 897.3171 |
| YDR259C   | 511.2926 | 454.8666 | 500.9448 | 421.748  | 301.893  | 434.425  | -0.34125 | 853.3266 | 964.9232 |
| YDL247W-1 | 34.5468  | 33.62057 | 26.67753 | 21.49034 | 14.97943 | 25.4393  | -0.61542 | 0        | 0        |
| YDR490C   | 1400.297 | 1600.933 | 1422.802 | 1360.16  | 1386.173 | 1362.96  | -0.10647 | 757.763  | 762.1049 |

|         |          |          |          |          |          |          |          |          |          |
|---------|----------|----------|----------|----------|----------|----------|----------|----------|----------|
| YGR177C | 735.8468 | 846.4474 | 893.2034 | 1024.373 | 1084.28  | 1282.728 | 0.454154 | 390.1243 | 469.7306 |
| YNL146C | 41.45616 | 32.63173 | 26.67753 | 31.34009 | 19.58848 | 32.28835 | -0.27605 | 4.49711  | 0        |
| YIL040W | 986.8869 | 1017.517 | 950.5107 | 941.9934 | 967.9013 | 767.0928 | -0.14251 | 507.0491 | 374.0285 |
| YIL118W | 3208.246 | 3050.573 | 2931.565 | 3070.433 | 3174.486 | 2785.604 | -0.02532 | 1967.486 | 1742.832 |
| YER053C | 2011.775 | 2052.833 | 1963.269 | 1810.562 | 1931.194 | 1637.9   | -0.16414 | 1053.448 | 993.0192 |
| YER098W | 263.7072 | 260.065  | 280.6081 | 204.1583 | 223.5391 | 269.0695 | -0.2072  | 502.552  | 580.3587 |
| YER021W | 2237.481 | 2134.906 | 2302.172 | 2206.342 | 1964.609 | 2234.745 | -0.05932 | 3494.254 | 3398.742 |
| YIR034C | 916.6417 | 983.8962 | 864.5497 | 795.1428 | 903.3746 | 796.4459 | -0.14831 | 1229.96  | 1278.37  |
| YER044C | 9005.199 | 8239.018 | 8621.784 | 9524.7   | 9549.96  | 8573.045 | 0.096103 | 5878.847 | 5030.068 |
| YOR027W | 3393.647 | 3670.576 | 3525.387 | 3073.119 | 3039.671 | 3419.629 | -0.15174 | 5426.887 | 5620.963 |
| YML121W | 1536.181 | 1772.991 | 1523.584 | 1511.488 | 1553.251 | 1324.801 | -0.13878 | 801.6098 | 808.639  |
| YMR322C | 28.789   | 27.68753 | 13.8328  | 24.17664 | 23.04527 | 23.48243 | 0.008083 | 0        | 0        |
| YAL044C | 3002.117 | 3008.053 | 2612.422 | 3065.956 | 2817.284 | 2403.036 | -0.0574  | 1620.084 | 1505.772 |
| YNR074C | 1304.717 | 1316.147 | 1211.358 | 1240.172 | 1336.626 | 1140.855 | -0.04379 | 719.5376 | 687.4748 |
| YGL162W | 165.8246 | 219.5226 | 173.898  | 154.0141 | 139.4239 | 106.6494 | -0.48317 | 324.9162 | 390.7105 |
| YOR356W | 2197.176 | 2849.838 | 2152.976 | 2324.539 | 2254.98  | 2125.16  | -0.10283 | 1158.006 | 1162.473 |
| YBR203W | 285.5869 | 259.0762 | 297.4051 | 241.7664 | 322.6338 | 462.7996 | 0.286708 | 866.8179 | 829.711  |
| YOL154W | 308.6181 | 361.9156 | 314.2021 | 258.7796 | 253.498  | 205.4713 | -0.45626 | 111.3035 | 68.48408 |
| YOR377W | 284.4353 | 305.5517 | 313.214  | 294.5968 | 308.8066 | 360.064  | 0.093189 | 583.5    | 634.7948 |
| YDR516C | 6494.798 | 7047.466 | 6479.677 | 5043.963 | 5131.029 | 4798.244 | -0.4192  | 11484.49 | 11058.42 |
| YOR267C | 879.7918 | 920.6104 | 852.693  | 879.3133 | 836.5433 | 1004.852 | 0.036306 | 1499.786 | 1870.142 |
| YGR142W | 369.6507 | 410.3688 | 288.5126 | 376.9765 | 195.8848 | 153.6143 | -0.55664 | 1829.199 | 1758.636 |
| YHR213W | 4.60624  | 0        | 0.988057 | 1.790862 | 0        | 0        | -1.6433  | 21.36127 | 27.21803 |
| YDL243C | 72.54828 | 76.14071 | 55.33118 | 53.72586 | 41.48148 | 50.87861 | -0.48189 | 163.0202 | 132.5782 |
| YKL062W | 700.1484 | 586.3824 | 727.2098 | 503.2322 | 577.284  | 652.616  | -0.2165  | 1084.928 | 1213.397 |
| YDR423C | 885.5496 | 1203.419 | 875.4183 | 1001.987 | 925.2676 | 773.9419 | -0.13413 | 358.6445 | 436.3665 |
| YNL117W | 267.1619 | 265.9981 | 217.3725 | 256.0933 | 212.0165 | 180.032  | -0.21161 | 75.32659 | 64.97208 |
| YMR002W | 9506.127 | 9269.39  | 9602.924 | 9213.09  | 8790.618 | 8029.035 | -0.12447 | 6181.278 | 5850.999 |
| YMR070W | 2670.467 | 2885.436 | 2595.625 | 2440.05  | 2466.996 | 2464.677 | -0.14507 | 1336.766 | 1562.842 |
| YIR028W | 74.8514  | 62.29695 | 52.36701 | 60.88931 | 39.17696 | 60.66295 | -0.23768 | 10.1185  | 1.756002 |
| YJL144W | 82.91232 | 82.07376 | 65.21175 | 42.98069 | 33.41564 | 37.18052 | -1.01921 | 207.9913 | 182.6242 |
| YLR130C | 3522.622 | 3815.935 | 3698.297 | 4008.845 | 3863.539 | 3564.438 | 0.051357 | 2240.685 | 2042.23  |
| YDR085C | 217.6448 | 329.2839 | 252.9425 | 239.0801 | 256.9548 | 187.8595 | -0.22599 | 675.6908 | 716.4489 |
| YOR192C | 42.60772 | 41.5313  | 42.48644 | 60.88931 | 43.78601 | 42.07269 | 0.212773 | 157.3988 | 212.4763 |
| YKL043W | 2145.356 | 1940.105 | 2184.594 | 2037.106 | 2061.399 | 2009.705 | -0.03773 | 3138.983 | 3137.098 |
| YDL042C | 1066.345 | 994.7735 | 827.0036 | 983.1833 | 1024.362 | 1098.782 | 0.105079 | 608.2341 | 444.2685 |
| YLR168C | 1539.636 | 1760.136 | 1450.467 | 1486.416 | 1409.218 | 1388.399 | -0.14903 | 909.5405 | 886.7811 |
| YJL035C | 374.257  | 335.2169 | 334.9513 | 308.9237 | 351.4404 | 268.0911 | -0.1698  | 694.8035 | 670.7928 |
| YPR195C | 124.3685 | 174.0359 | 163.0294 | 103.87   | 162.4691 | 152.6358 | -0.13926 | 32.60405 | 22.82803 |
| YDL025C | 560.8097 | 491.4537 | 643.225  | 491.5916 | 571.5227 | 628.1551 | -0.00359 | 966.8786 | 1108.037 |
| YCR039C | 3.45468  | 3.955362 | 0.988057 | 7.163448 | 1.152263 | 0        | -0.01422 | 71.95376 | 44.77805 |
| YER020W | 1267.867 | 1202.43  | 1314.116 | 1169.433 | 1114.239 | 1091.933 | -0.16492 | 1747.127 | 2058.035 |
| YMR278W | 704.7547 | 698.1213 | 562.2043 | 577.553  | 574.9795 | 562.6    | -0.19627 | 1012.974 | 1081.697 |
| YER141W | 4753.639 | 7350.051 | 4974.866 | 5185.441 | 5110.288 | 4273.803 | -0.22923 | 2179.974 | 2166.029 |
| YLR286C | 543.5363 | 575.5051 | 590.858  | 475.4739 | 412.5103 | 452.0368 | -0.35166 | 827.4682 | 896.4391 |
| YHR042W | 12951.59 | 13440.32 | 13220.2  | 14737    | 15436.87 | 14372.23 | 0.169358 | 8841.318 | 9206.719 |
| YFR010W | 2095.839 | 1892.641 | 2106.537 | 2054.119 | 1995.72  | 2110.484 | 0.015376 | 3120.994 | 3101.978 |
| YOR355W | 3559.472 | 3392.712 | 3482.9   | 3493.076 | 3356.543 | 3363.859 | -0.03097 | 2011.332 | 2365.335 |
| YPL170W | 4202.042 | 4473.514 | 3982.857 | 4431.488 | 4067.49  | 3337.441 | -0.09686 | 2223.821 | 1929.846 |
| YLL029W | 1932.318 | 2084.476 | 1955.364 | 1834.738 | 1942.716 | 1828.694 | -0.09124 | 2851.168 | 3025.592 |
| YHL033C | 29803.52 | 28261.06 | 28912.52 | 32855.16 | 30129.39 | 27981.28 | 0.064689 | 21985.25 | 19529.38 |
| YBR009C | 11534.02 | 11027.55 | 11206.54 | 11979.97 | 12553.91 | 11310.71 | 0.086094 | 7964.382 | 6813.288 |
| YBL081W | 1794.13  | 1791.779 | 1776.526 | 1954.726 | 1874.733 | 1799.341 | 0.069939 | 1198.48  | 1247.64  |
| YLR180W | 19455.61 | 23987.29 | 21068.34 | 25555.6  | 24175.64 | 21540.24 | 0.143775 | 12286.1  | 12129.58 |

|         |          |          |          |          |          |          |          |          |          |
|---------|----------|----------|----------|----------|----------|----------|----------|----------|----------|
| YGR097W | 970.765  | 1013.561 | 1085.874 | 907.0716 | 1031.276 | 1184.884 | 0.024707 | 1517.775 | 1948.284 |
| YOR344C | 968.4619 | 972.0301 | 1077.97  | 933.0391 | 914.8972 | 939.2973 | -0.11498 | 1401.974 | 1792.878 |
| YJL225C | 20.72808 | 23.73217 | 31.61782 | 28.65379 | 44.93828 | 33.26678 | 0.490154 | 2.248555 | 3.512004 |
| YJL191W | 5831.5   | 5339.738 | 5162.597 | 6379.946 | 6305.186 | 5367.693 | 0.144361 | 4077.754 | 3679.703 |
| YMR311C | 2457.429 | 1891.652 | 2055.158 | 2020.988 | 1921.975 | 1871.746 | -0.13932 | 3563.96  | 3336.404 |
| YHR037W | 2093.536 | 2650.092 | 2402.954 | 2062.178 | 2097.12  | 2060.584 | -0.20037 | 1314.28  | 1258.176 |
| YEL044W | 2931.872 | 2676.791 | 2789.284 | 3061.479 | 2953.251 | 2422.604 | 0.006751 | 1685.292 | 1521.576 |
| YEL036C | 5710.586 | 6211.896 | 5986.636 | 6531.274 | 6062.058 | 5786.463 | 0.037426 | 3553.841 | 3650.728 |
| YOL032W | 423.7741 | 420.2572 | 358.6646 | 291.9105 | 298.4362 | 250.4793 | -0.51639 | 836.4624 | 734.8869 |
| YGL188C | 488.2614 | 433.1121 | 405.1033 | 439.6566 | 407.9013 | 370.8268 | -0.12263 | 233.8497 | 219.5003 |
| YDL241W | 223.4026 | 255.1208 | 224.2889 | 189.8314 | 163.6214 | 176.1182 | -0.40832 | 447.4624 | 393.3445 |
| YJL053W | 536.6269 | 532.985  | 575.0491 | 563.2261 | 541.5638 | 573.3627 | 0.029084 | 981.4942 | 889.4151 |
| YPR005C | 305.1634 | 282.8084 | 296.417  | 244.4527 | 252.3457 | 275.9186 | -0.19474 | 561.0145 | 512.7526 |
| YNL332W | 25.33432 | 25.70985 | 32.60588 | 20.59491 | 16.13169 | 17.61182 | -0.62239 | 0        | 0        |
| YMR265C | 123.2169 | 201.7234 | 185.7547 | 163.8639 | 188.9712 | 198.6222 | 0.110787 | 413.7341 | 412.6605 |
| YER091C | 20977.97 | 26173.62 | 24230.12 | 27885.51 | 27348.97 | 30686.65 | 0.267459 | 11028.04 | 11157.64 |
| YDR540C | 173.8856 | 166.1252 | 213.4203 | 158.4913 | 139.4239 | 142.8515 | -0.32839 | 55.0896  | 41.26605 |
| YDL070W | 3192.124 | 2737.11  | 3364.333 | 3277.278 | 3557.037 | 4019.41  | 0.223886 | 1860.679 | 1998.33  |
| YHR174W | 264712.5 | 223286.1 | 249745.2 | 262218   | 247694   | 241179.3 | 0.025868 | 434733.4 | 374781.8 |
| YLR259C | 7775.333 | 8865.943 | 7599.145 | 7606.687 | 7723.622 | 6833.388 | -0.12922 | 14241.22 | 13511.56 |
| YOR360C | 1715.824 | 1781.89  | 1769.61  | 1588.495 | 1729.547 | 1615.396 | -0.09448 | 991.6127 | 1034.285 |
| YDR436W | 391.5304 | 403.4469 | 389.2944 | 280.2699 | 265.0206 | 337.56   | -0.42376 | 617.2283 | 652.3548 |
| YBR072W | 4569.39  | 4223.337 | 4127.113 | 4168.231 | 3678.025 | 3330.592 | -0.20907 | 10125.24 | 9032.875 |
| YPL106C | 14187.22 | 13439.33 | 13759.68 | 13937.38 | 13832.92 | 15108.01 | 0.051098 | 21730.04 | 21817.45 |
| YAR031W | 29.94056 | 32.63173 | 21.73725 | 26.86293 | 19.58848 | 22.504   | -0.29003 | 0        | 0        |
| YLR120C | 950.0369 | 1108.49  | 1041.412 | 927.6665 | 948.3128 | 1109.545 | -0.05426 | 1509.905 | 1650.642 |
| YMR170C | 916.6417 | 771.2955 | 875.4183 | 787.9793 | 814.6503 | 690.7749 | -0.16054 | 414.8584 | 270.4243 |
| YGR281W | 2601.374 | 2984.32  | 2725.061 | 2570.782 | 2487.737 | 2913.779 | -0.05998 | 1497.538 | 1640.984 |
| YEL030W | 306.3149 | 297.641  | 223.3008 | 231.9166 | 187.8189 | 220.1478 | -0.37053 | 627.3468 | 562.7987 |
| YDR168W | 1271.322 | 1166.832 | 1435.647 | 1280.466 | 1388.477 | 1495.048 | 0.104218 | 2298.023 | 2296.851 |
| YFR050C | 2631.314 | 2630.316 | 2786.32  | 2514.37  | 2579.918 | 2495.009 | -0.08466 | 3958.581 | 3798.233 |
| YKL152C | 27638.59 | 23806.33 | 30696.95 | 30364.07 | 28848.07 | 32101.46 | 0.152712 | 50666.69 | 48476.2  |
| YBR239C | 1074.405 | 1336.912 | 1167.883 | 1144.361 | 1171.852 | 1224.022 | -0.01579 | 573.3815 | 609.3327 |
| YNL142W | 613.7814 | 923.577  | 612.5952 | 548.0038 | 462.0577 | 422.6838 | -0.58552 | 252.9624 | 218.6223 |
| YPR160W | 10859.21 | 11236.19 | 10436.84 | 9931.226 | 9233.087 | 9020.19  | -0.20697 | 8893.035 | 8067.074 |
| YMR180C | 252.1916 | 260.065  | 239.1098 | 246.2435 | 246.5844 | 264.1774 | 0.010787 | 504.8006 | 495.1926 |
| YDR459C | 704.7547 | 654.6124 | 613.5833 | 573.0759 | 586.5021 | 557.7078 | -0.20022 | 364.2659 | 249.3523 |
| YCL036W | 1379.569 | 2171.494 | 1596.7   | 2101.577 | 2183.539 | 2079.174 | 0.306054 | 867.9422 | 932.4371 |
| YHR097C | 856.7606 | 946.3203 | 902.0959 | 752.1621 | 782.3869 | 698.6024 | -0.27664 | 1527.893 | 1603.23  |
| YOL059W | 2980.237 | 3511.372 | 3212.173 | 3141.172 | 2979.753 | 2969.549 | -0.09419 | 4783.801 | 4771.936 |
| YGL196W | 1140.044 | 1225.173 | 1272.617 | 1250.022 | 1306.667 | 1267.073 | 0.071912 | 753.2659 | 573.3347 |
| YOL014W | 955.7947 | 888.9675 | 826.0155 | 967.9609 | 913.7449 | 653.5944 | -0.0751  | 2211.454 | 1736.686 |
| YOR362C | 4217.012 | 4154.119 | 4082.651 | 3935.419 | 3866.996 | 3584.985 | -0.12915 | 6183.526 | 5817.635 |
| YMR104C | 211.887  | 248.1989 | 192.6711 | 210.4263 | 172.8395 | 249.5009 | -0.04487 | 485.6879 | 506.6066 |
| YML048W | 4537.146 | 4496.257 | 4249.632 | 4273.892 | 4182.716 | 4002.776 | -0.09235 | 6330.806 | 6472.624 |
| YPL049C | 2898.476 | 3047.606 | 2761.619 | 3280.859 | 2768.889 | 2609.485 | -0.00805 | 4030.535 | 5001.972 |
| YEL071W | 4253.862 | 5191.412 | 4697.222 | 4275.683 | 3855.474 | 4298.264 | -0.18628 | 5989.026 | 5966.017 |
| YIL162W | 7523.141 | 7988.842 | 8067.484 | 4578.339 | 4697.778 | 4499.821 | -0.77538 | 5358.306 | 5190.742 |
| YNR073C | 76.00296 | 88.99564 | 63.23564 | 35.81724 | 31.11111 | 37.18052 | -1.13242 | 172.0145 | 172.0882 |
| YJL166W | 3734.509 | 3754.627 | 3519.458 | 3474.272 | 3454.486 | 2938.239 | -0.15795 | 2470.038 | 2354.799 |
| YDR358W | 591.9018 | 543.8622 | 574.061  | 460.2515 | 417.1194 | 495.088  | -0.31709 | 838.711  | 1019.359 |
| YNR020C | 1043.313 | 882.0457 | 769.6963 | 710.9722 | 799.6708 | 831.6695 | -0.20238 | 431.7226 | 439.0005 |
| YGL012W | 7617.569 | 7424.214 | 7177.245 | 7210.011 | 7493.169 | 6649.442 | -0.05738 | 5204.28  | 4605.994 |
| YIRO38C | 1996.805 | 1982.625 | 1795.299 | 1899.209 | 1794.074 | 1701.498 | -0.09819 | 1288.422 | 1188.813 |

|         |          |          |          |          |          |          |          |          |          |
|---------|----------|----------|----------|----------|----------|----------|----------|----------|----------|
| YKR076W | 865.9731 | 850.4028 | 733.1382 | 670.6778 | 661.3992 | 548.9019 | -0.38101 | 337.2832 | 413.5385 |
| YBR196C | 25592.27 | 24122.76 | 25135.18 | 24383.48 | 23998.19 | 25221.11 | -0.02425 | 37763.36 | 35512.51 |
| YMR196W | 2935.326 | 2912.135 | 2915.756 | 2285.14  | 2225.021 | 2492.073 | -0.32365 | 1851.685 | 1863.118 |
| YGL011C | 4036.218 | 3700.241 | 3838.601 | 3712.457 | 3696.461 | 3664.238 | -0.06395 | 5759.674 | 5385.659 |
| YER081W | 1935.772 | 1926.261 | 2038.361 | 1743.404 | 1760.659 | 1773.902 | -0.16083 | 1000.607 | 1047.455 |
| YIR003W | 1137.741 | 1063.992 | 1217.286 | 1131.825 | 1085.432 | 1202.496 | 0.00031  | 1716.772 | 1880.678 |
| YLL024C | 37091.75 | 29974.72 | 34888.29 | 34078.31 | 31162.97 | 32770.71 | -0.0569  | 56707.43 | 53475.53 |
| YPR174C | 362.7414 | 375.7594 | 420.9122 | 390.4079 | 422.8807 | 443.2309 | 0.116039 | 656.578  | 722.5949 |
| YGR127W | 280.9806 | 230.3998 | 270.7276 | 232.8121 | 207.4074 | 215.2556 | -0.25483 | 460.9538 | 464.4626 |
| YML032C | 826.82   | 923.577  | 829.9677 | 740.5215 | 737.4486 | 774.9203 | -0.1958  | 1131.023 | 1256.42  |
| YHR203C | 29641.15 | 26652.22 | 29360.11 | 31211.14 | 30256.13 | 29225.84 | 0.082481 | 49200.63 | 44970.34 |
| YPL058C | 3022.845 | 3302.727 | 3368.286 | 5870.446 | 6759.178 | 7482.09  | 1.052893 | 6710.812 | 8026.686 |
| YML132W | 13.81872 | 12.85493 | 19.76114 | 20.59491 | 20.74074 | 9.784347 | 0.138682 | 79.8237  | 65.85008 |
| YBL071W | 788.8186 | 853.3693 | 657.0578 | 868.5681 | 865.3499 | 701.5377 | 0.083031 | 463.2023 | 429.3425 |
| YDR381C | 550.4457 | 625.936  | 433.7569 | 398.4668 | 455.1441 | 379.6327 | -0.38473 | 254.0867 | 212.4763 |
| YCL048W | 49.51708 | 47.46434 | 65.21175 | 37.6081  | 38.02469 | 33.26678 | -0.57471 | 4.49711  | 5.268006 |
| YPR078C | 0        | 9.888404 | 5.928341 | 13.43147 | 9.218108 | 5.870608 | 0.85053  | 50.59249 | 46.53406 |
| YBL045C | 7896.247 | 7553.752 | 8444.922 | 8003.363 | 7874.569 | 8198.304 | 0.010906 | 6027.252 | 6213.614 |
| YMR023C | 293.6478 | 278.853  | 280.6081 | 313.4009 | 315.7202 | 302.3363 | 0.12676  | 164.1445 | 161.5522 |
| YEL058W | 1953.046 | 2067.665 | 1875.332 | 2072.027 | 1988.807 | 2007.748 | 0.041612 | 3260.405 | 2903.55  |
| YGR286C | 2062.444 | 2117.107 | 1959.317 | 2150.825 | 2008.395 | 1925.56  | -0.01277 | 2647.673 | 2536.545 |
| YDR330W | 963.8557 | 995.7623 | 1149.11  | 837.228  | 854.9795 | 964.7366 | -0.22656 | 1416.59  | 1575.134 |
| YAL017W | 631.0548 | 542.8734 | 619.5116 | 505.0231 | 450.535  | 542.0528 | -0.26007 | 933.1503 | 1029.017 |
| YIL135C | 1137.741 | 1128.267 | 1263.725 | 1071.831 | 1185.679 | 1073.343 | -0.08367 | 1506.532 | 1584.792 |
| YEL017W | 1409.509 | 1395.254 | 1287.438 | 1451.494 | 1431.111 | 1338.499 | 0.044743 | 908.4162 | 818.297  |
| YDL048C | 435.2897 | 444.9782 | 538.491  | 617.8474 | 442.4692 | 602.7158 | 0.229187 | 891.552  | 1220.421 |
| YJL170C | 125.52   | 141.4042 | 104.734  | 130.7329 | 175.144  | 101.7572 | 0.133298 | 24.7341  | 22.82803 |
| YOR036W | 613.7814 | 568.5832 | 604.6908 | 503.2322 | 449.3828 | 452.0368 | -0.34737 | 969.1272 | 882.3911 |
| YPR071W | 537.7785 | 600.2261 | 534.5387 | 613.3703 | 645.2675 | 599.7805 | 0.152032 | 308.052  | 324.8604 |
| YMR305C | 6357.762 | 6867.497 | 6633.814 | 7200.161 | 7504.692 | 7571.128 | 0.165691 | 10315.25 | 10022.38 |
| YBR208C | 2470.096 | 2642.182 | 2725.061 | 2360.356 | 2448.56  | 3049.781 | 0.003926 | 1620.084 | 1665.568 |
| YPL078C | 5811.923 | 5527.618 | 5881.902 | 5415.567 | 5382.223 | 5024.262 | -0.12227 | 4491.489 | 4058.121 |
| YLL006W | 347.7711 | 442.0117 | 456.4823 | 337.5775 | 371.0288 | 413.8779 | -0.15092 | 735.2775 | 757.7149 |
| YDL087C | 208.4323 | 262.0427 | 222.3128 | 220.276  | 195.8848 | 259.2852 | -0.03657 | 427.2254 | 466.2186 |
| YPL081W | 9212.48  | 10054.53 | 8962.663 | 10938.59 | 10124.94 | 9028.996 | 0.092193 | 6548.916 | 5412.877 |
| YER012W | 2196.025 | 1769.036 | 1869.404 | 1855.333 | 1735.309 | 1810.104 | -0.11144 | 2933.24  | 2859.649 |
| YHR031C | 1342.719 | 1425.908 | 1367.471 | 1437.167 | 1500.247 | 1667.253 | 0.154827 | 778      | 827.955  |
| YOR387C | 6.90936  | 4.944202 | 0.988057 | 0.895431 | 4.609054 | 4.892174 | -0.30471 | 33.72832 | 35.12004 |
| YBR034C | 5096.804 | 5333.805 | 5198.167 | 5857.91  | 5851.194 | 5810.924 | 0.1648   | 4165.448 | 3973.833 |
| YKL213C | 1006.463 | 1001.695 | 1019.675 | 956.3203 | 964.4445 | 1009.745 | -0.04713 | 1381.737 | 1548.794 |
| YIR029W | 271.7681 | 267.9758 | 217.3725 | 154.0141 | 197.0371 | 151.6574 | -0.59079 | 96.68786 | 73.75209 |
| YNR001C | 2152.266 | 2217.969 | 2187.558 | 1482.834 | 1479.506 | 1408.946 | -0.58515 | 2999.572 | 2679.659 |
| YHR180W | 302.8603 | 343.1276 | 321.1185 | 288.3288 | 289.2181 | 230.9106 | -0.2585  | 83.19653 | 136.9682 |
| YLR303W | 8959.136 | 10277.02 | 9024.911 | 10048.53 | 9218.108 | 8705.134 | -0.01484 | 4371.191 | 3802.623 |
| YCR099C | 52.97176 | 32.63173 | 39.52227 | 33.13095 | 41.48148 | 22.504   | -0.36559 | 125.9191 | 113.2621 |
| YKL059C | 724.3312 | 729.7642 | 725.2337 | 687.691  | 624.5268 | 694.6886 | -0.11891 | 1080.431 | 987.7512 |
| YGR013W | 705.9062 | 656.59   | 640.2608 | 719.0311 | 621.07   | 701.5377 | 0.02774  | 1062.442 | 1116.817 |
| YPR035W | 21527.26 | 21155.25 | 20981.39 | 20500.89 | 19880    | 21157.67 | -0.04898 | 26622.89 | 26174.97 |
| YPL075W | 802.6373 | 798.9831 | 1012.758 | 862.3001 | 927.5721 | 1031.27  | 0.109811 | 1432.33  | 1572.5   |
| YBL030C | 10296.1  | 12602.77 | 9985.302 | 10179.26 | 10300.08 | 8173.844 | -0.1987  | 6915.431 | 6379.556 |
| YNR036C | 3500.742 | 2887.414 | 3103.486 | 2972.831 | 3100.741 | 2741.574 | -0.10667 | 2495.896 | 2053.645 |
| YAL038W | 23106.05 | 24855.49 | 29319.6  | 28661.85 | 29486.42 | 35547.51 | 0.277868 | 44343.75 | 48021.39 |
| YDL067C | 2815.564 | 2859.727 | 2736.917 | 2611.077 | 2758.519 | 2469.569 | -0.10178 | 2120.387 | 1935.114 |
| YPR048W | 559.6581 | 718.887  | 593.8222 | 752.1621 | 670.6173 | 695.6671 | 0.178143 | 1096.171 | 1199.349 |

|                   |          |          |          |          |          |          |          |          |          |
|-------------------|----------|----------|----------|----------|----------|----------|----------|----------|----------|
| YDR050C           | 75932.71 | 60613.94 | 66797.58 | 71103.49 | 66015.48 | 63485.74 | -0.01957 | 126580.2 | 103132.6 |
| YPR140W           | 754.2718 | 960.1641 | 798.3499 | 901.699  | 768.5597 | 752.4163 | -0.05269 | 411.4856 | 453.9266 |
| YDL007W           | 3455.831 | 3471.819 | 3419.665 | 3623.809 | 3459.095 | 3358.966 | 0.013124 | 4914.217 | 4546.29  |
| YNL231C           | 3438.558 | 3669.587 | 3341.608 | 3453.677 | 3022.387 | 2825.719 | -0.16789 | 2001.214 | 1903.506 |
| YKL146W           | 674.8141 | 791.0723 | 682.7473 | 645.6058 | 707.4898 | 699.5808 | -0.06591 | 1109.662 | 1161.595 |
| YIL066C           | 285.5869 | 271.9311 | 222.3128 | 196.9948 | 215.4733 | 225.04   | -0.29072 | 344.0289 | 364.3704 |
| YBR183W           | 900.5199 | 1272.638 | 968.2957 | 1148.838 | 1054.321 | 816.993  | -0.05681 | 433.9711 | 367.0044 |
| YJR104C           | 26569.94 | 23875.55 | 23645.19 | 27921.33 | 27135.8  | 23532.33 | 0.085044 | 18502.23 | 15005.92 |
| YLR073C           | 1494.725 | 1846.165 | 1362.53  | 1754.149 | 1626.996 | 1375.679 | 0.016289 | 830.8411 | 783.177  |
| YIL075C           | 4282.651 | 4193.672 | 4143.91  | 3931.838 | 4130.865 | 4095.728 | -0.05378 | 5584.286 | 6079.279 |
| YGR122C- <i>t</i> | 1.15156  | 5.933043 | 2.96417  | 0        | 0        | 0.978435 | -3.3604  | 20.23699 | 28.09603 |
| YOR389W           | 422.6225 | 508.264  | 435.7331 | 437.8658 | 477.0371 | 390.3955 | -0.06623 | 212.4884 | 170.3322 |
| YKL193C           | 921.248  | 662.5231 | 808.2305 | 732.4626 | 755.8848 | 736.7613 | -0.10434 | 1299.665 | 1296.808 |
| YIL145C           | 1647.882 | 1591.044 | 1574.963 | 1672.665 | 1751.44  | 1678.994 | 0.084171 | 1070.312 | 1050.967 |
| YHR125W           | 28.789   | 14.83261 | 26.67753 | 28.65379 | 14.97943 | 13.69809 | -0.29418 | 0        | 0        |
| YML030W           | 1236.775 | 973.019  | 1138.241 | 1029.746 | 969.0536 | 1020.507 | -0.1491  | 722.9104 | 657.6228 |
| YDL085W           | 193.4621 | 283.7972 | 221.3247 | 193.4131 | 173.9918 | 127.1965 | -0.49817 | 65.20809 | 65.85008 |
| YOR035C           | 416.8647 | 433.1121 | 446.6017 | 458.4607 | 413.6626 | 508.7861 | 0.090909 | 744.2717 | 783.177  |
| YIL166C           | 293.6478 | 309.5071 | 334.9513 | 284.7471 | 360.6585 | 410.9426 | 0.171262 | 105.6821 | 106.2381 |
| YML128C           | 3347.585 | 3774.404 | 3333.704 | 3032.825 | 2589.136 | 2798.323 | -0.31235 | 5552.806 | 5460.289 |
| YDR225W           | 16628.53 | 14438.06 | 14847.53 | 15927.03 | 15549.8  | 13379.12 | -0.03364 | 10467.02 | 8998.633 |
| YMR181C           | 652.9345 | 685.2664 | 612.5952 | 538.154  | 473.5803 | 497.0448 | -0.37068 | 876.9364 | 927.1691 |
| YMR020W           | 629.9033 | 683.2887 | 607.6549 | 576.6576 | 498.9301 | 491.1742 | -0.29396 | 966.8786 | 875.3671 |
| YMR251W- <i>t</i> | 17628.08 | 20188.17 | 17040.03 | 15422.01 | 15425.35 | 14096.31 | -0.28754 | 11520.47 | 10968.87 |
| YOR390W           | 80.6092  | 111.739  | 103.746  | 99.39284 | 119.8354 | 108.6063 | 0.146912 | 329.4133 | 219.5003 |
| YOR259C           | 3735.66  | 4031.502 | 3919.621 | 3987.354 | 3724.116 | 3927.437 | -0.00592 | 5790.029 | 5124.892 |
| YDR286C           | 295.9509 | 250.1766 | 314.2021 | 242.6618 | 239.6708 | 282.7676 | -0.16924 | 143.9075 | 137.8462 |
| YGL036W           | 646.0251 | 611.1034 | 616.5475 | 645.6058 | 536.9548 | 612.5001 | -0.06184 | 894.9249 | 1068.527 |
| YAR073W           | 20.72808 | 25.70985 | 21.73725 | 12.53603 | 20.74074 | 35.22365 | 0.006866 | 0        | 2.634003 |
| YEL017C- <i>t</i> | 5410.029 | 5286.341 | 5288.08  | 6186.533 | 6524.116 | 5285.504 | 0.171019 | 4003.552 | 3497.078 |
| YGR186W           | 1699.702 | 1837.266 | 1854.583 | 1833.843 | 1786.008 | 2142.772 | 0.096025 | 2873.653 | 2809.603 |
| YOR043W           | 2197.176 | 2231.813 | 2016.624 | 2138.289 | 1962.305 | 2032.209 | -0.07177 | 1410.968 | 1418.85  |
| YDR394W           | 3215.155 | 3113.859 | 3039.263 | 3197.584 | 3062.716 | 3216.115 | 0.016558 | 4157.578 | 4175.773 |
| YDR461C- <i>t</i> | 193.4621 | 201.7234 | 130.4235 | 133.4192 | 144.0329 | 101.7572 | -0.471   | 60.71098 | 53.55807 |
| YGR091W           | 665.6016 | 676.3669 | 745.9829 | 688.5865 | 713.2511 | 695.6671 | 0.006586 | 362.0173 | 375.7845 |
| YPL061W           | 63798.72 | 76179.28 | 64348.19 | 61170.48 | 61580.42 | 57823.53 | -0.17828 | 36707.66 | 36201.74 |
| YBR244W           | 1490.119 | 1394.265 | 1509.751 | 1826.679 | 2070.617 | 1724.002 | 0.355324 | 1091.673 | 872.7331 |
| YGL067W           | 1077.86  | 1030.372 | 1001.89  | 1119.289 | 1132.675 | 941.2542 | 0.03804  | 634.0925 | 582.1147 |
| YMR016C           | 968.4619 | 807.8826 | 1040.424 | 1053.922 | 1004.774 | 1263.159 | 0.237948 | 1481.798 | 1999.208 |
| YGR136W           | 537.7785 | 590.3377 | 610.6191 | 566.8078 | 546.1729 | 550.8587 | -0.06352 | 790.3671 | 822.687  |
| YNL067W           | 12585.4  | 11941.24 | 12578.95 | 14733.42 | 13991.94 | 12712.8  | 0.159323 | 10302.88 | 8975.805 |
| YMR171C           | 1235.624 | 1434.807 | 1368.459 | 1347.624 | 1368.889 | 1637.9   | 0.108519 | 758.8873 | 885.9031 |
| YHR115C           | 1312.778 | 1341.856 | 1211.358 | 1233.009 | 1168.395 | 1084.106 | -0.14947 | 749.8931 | 814.785  |
| YJR154W           | 25.33432 | 31.64289 | 53.35507 | 41.18983 | 42.63375 | 43.05113 | 0.201549 | 88.81792 | 159.7962 |
| YOR338W           | 511.2926 | 818.7599 | 537.5029 | 525.618  | 448.2305 | 431.4897 | -0.41023 | 220.3584 | 211.5983 |
| YMR152W           | 2292.756 | 2503.744 | 2337.742 | 2365.729 | 2281.482 | 2247.465 | -0.04928 | 1668.428 | 1532.112 |
| YDR004W           | 948.8854 | 1063.992 | 1014.734 | 978.7061 | 899.9178 | 895.2678 | -0.12627 | 554.2688 | 512.7526 |
| YPL256C           | 1138.893 | 1098.602 | 1063.149 | 1225.845 | 1230.617 | 1319.908 | 0.194253 | 1635.824 | 1742.832 |
| YMR266W           | 1935.772 | 1968.781 | 1998.839 | 2013.824 | 2072.922 | 2301.278 | 0.113826 | 2925.37  | 3342.55  |
| YOR247W           | 7109.731 | 6493.715 | 7426.235 | 7663.099 | 8623.54  | 8248.205 | 0.222405 | 11854.38 | 12382.45 |
| YCR075C           | 664.4501 | 583.4159 | 615.5594 | 514.8728 | 472.428  | 461.8212 | -0.36278 | 305.8035 | 281.8383 |
| YOL106W           | 24.18276 | 24.72101 | 21.73725 | 23.28121 | 20.74074 | 26.41774 | -0.00412 | 0        | 3.512004 |
| YCR028C           | 837.1841 | 1135.189 | 937.6659 | 1043.177 | 1002.469 | 917.7718 | 0.026224 | 545.2746 | 587.3827 |
| YLR100W           | 2873.142 | 3618.167 | 3061.988 | 3458.155 | 3468.313 | 3172.085 | 0.080078 | 2039.439 | 2020.28  |

|         |          |          |          |          |          |          |          |          |          |
|---------|----------|----------|----------|----------|----------|----------|----------|----------|----------|
| YMR025W | 200.3714 | 212.6007 | 257.8828 | 160.2822 | 194.7325 | 232.8675 | -0.19047 | 104.5578 | 93.06811 |
| YDL126C | 6951.967 | 7283.799 | 7205.898 | 6943.172 | 6776.461 | 7525.141 | -0.01331 | 9663.165 | 10387.63 |
| YGL174W | 458.3209 | 411.3576 | 400.163  | 487.1145 | 464.3622 | 442.2525 | 0.134302 | 716.1648 | 662.0128 |
| YPL054W | 52.97176 | 65.26347 | 53.35507 | 36.71267 | 27.65432 | 19.56869 | -1.03161 | 110.1792 | 121.1641 |
| YDL089W | 354.6805 | 372.7928 | 373.4855 | 362.6496 | 361.8107 | 320.9266 | -0.07472 | 553.1445 | 621.6248 |
| YBL107C | 1252.897 | 1109.479 | 1204.441 | 1355.683 | 1258.272 | 1189.777 | 0.092778 | 817.3497 | 732.2529 |
| YNR034W | 351.2258 | 435.0898 | 311.2379 | 308.9237 | 372.1811 | 309.1854 | -0.14837 | 709.4191 | 676.9388 |
| YOR208W | 282.1322 | 275.8865 | 255.9067 | 206.8446 | 233.9095 | 264.1774 | -0.20741 | 417.1069 | 531.1906 |
| YJR113C | 1285.141 | 1381.41  | 1183.692 | 1176.596 | 987.4898 | 866.8932 | -0.34517 | 744.2717 | 654.1108 |
| YNL130C | 2160.326 | 2319.82  | 2118.394 | 2223.355 | 2514.239 | 2038.08  | 0.038218 | 1482.922 | 1360.024 |
| YNL100W | 1281.686 | 1498.093 | 1327.948 | 1155.106 | 1216.79  | 1064.537 | -0.25743 | 865.6937 | 827.077  |
| YMR182C | 244.1307 | 247.2101 | 315.1901 | 309.8191 | 303.0453 | 331.6894 | 0.227903 | 477.8179 | 681.3288 |
| YFL053W | 20.72808 | 31.64289 | 49.40284 | 37.6081  | 20.74074 | 28.37461 | -0.23087 | 88.81792 | 122.0421 |
| YNL055C | 17547.47 | 17598.39 | 18100.21 | 17829.82 | 17434.9  | 17337.86 | -0.01754 | 13842.1  | 11981.2  |
| YBR010W | 18732.43 | 16844.9  | 17653.61 | 20207.19 | 18945.52 | 16659.81 | 0.068324 | 12181.55 | 11504.45 |
| YGR248W | 1456.723 | 1311.202 | 1428.73  | 1208.832 | 1190.288 | 1020.507 | -0.2954  | 2519.506 | 2326.703 |
| YAL046C | 852.1544 | 791.0723 | 797.3619 | 805.8879 | 876.8725 | 737.7398 | -0.01192 | 580.1272 | 431.0985 |
| YGR123C | 2056.686 | 2008.335 | 2072.943 | 2183.956 | 2238.848 | 2171.147 | 0.103383 | 1579.61  | 1508.406 |
| YNL208W | 7784.545 | 7958.188 | 7047.809 | 7632.654 | 6940.083 | 5907.789 | -0.15418 | 11563.19 | 10144.42 |
| YGR223C | 599.9627 | 550.7841 | 530.5865 | 407.4211 | 443.6214 | 478.4546 | -0.33873 | 817.3497 | 748.9349 |
| YLR414C | 1520.059 | 1692.895 | 1227.167 | 1327.924 | 1272.099 | 1154.553 | -0.24195 | 2508.263 | 2191.491 |
| YOL085C | 34.5468  | 49.44202 | 45.45061 | 35.81724 | 33.41564 | 16.63339 | -0.59211 | 3.372832 | 2.634003 |
| YMR250W | 6189.635 | 7117.673 | 6049.872 | 5757.621 | 5315.391 | 4921.527 | -0.27529 | 4718.593 | 4516.438 |
| YAR023C | 99.03415 | 137.4488 | 97.81763 | 62.68017 | 81.81071 | 55.77078 | -0.73926 | 276.5723 | 211.5983 |
| YIL077C | 795.7279 | 872.1573 | 775.6246 | 647.3966 | 659.0947 | 571.4059 | -0.37984 | 481.1908 | 381.0525 |
| YOR385W | 266.0103 | 344.1165 | 335.9393 | 241.7664 | 256.9548 | 227.9753 | -0.38059 | 509.2977 | 529.4346 |
| YER126C | 5475.668 | 5530.585 | 5131.967 | 6456.058 | 5950.289 | 5757.11  | 0.170557 | 4311.604 | 3649.85  |
| YMR208W | 2495.43  | 3175.167 | 2524.485 | 2770.464 | 2942.881 | 2522.405 | 0.007141 | 1671.801 | 1655.91  |
| YKR070W | 971.9166 | 977.9632 | 999.9135 | 941.098  | 904.5268 | 826.7773 | -0.14248 | 636.3411 | 564.5547 |
| YIL010W | 1576.486 | 1314.169 | 1343.757 | 1265.244 | 1251.358 | 1277.836 | -0.15828 | 950.0145 | 863.9531 |
| YOR071C | 233.7667 | 346.0942 | 323.0946 | 372.4993 | 266.1729 | 267.1127 | 0.004514 | 516.0434 | 535.5807 |
| YJR115W | 423.7741 | 397.5139 | 502.9209 | 203.2628 | 178.6008 | 217.2125 | -1.14432 | 555.3931 | 663.7688 |
| YOR285W | 7128.156 | 5718.464 | 6511.294 | 5668.974 | 5954.898 | 5509.566 | -0.17611 | 4900.726 | 4024.757 |
| YOL112W | 628.7517 | 760.4183 | 693.6159 | 653.6646 | 755.8848 | 618.3707 | -0.03851 | 1054.572 | 1063.259 |
| YPL068C | 1240.23  | 1247.917 | 1141.206 | 1266.139 | 1171.852 | 1031.27  | -0.06508 | 662.1994 | 792.835  |
| YKL219W | 542.3847 | 483.543  | 496.9926 | 554.2718 | 432.0988 | 434.425  | -0.10014 | 1050.075 | 841.125  |
| YLR407W | 1653.64  | 1824.411 | 1788.383 | 1969.053 | 1844.774 | 1610.504 | 0.042619 | 1012.974 | 1111.549 |
| YPL177C | 1870.133 | 1934.172 | 1708.35  | 1703.11  | 1631.605 | 1536.143 | -0.17857 | 2307.017 | 2378.505 |
| YJL106W | 36.84992 | 50.43086 | 50.3909  | 59.09845 | 58.76544 | 52.83547 | 0.310226 | 98.93642 | 97.45812 |
| YDL097C | 3363.707 | 3278.006 | 3273.432 | 3056.106 | 3151.441 | 3438.22  | -0.03974 | 4517.347 | 4371.567 |
| YDR277C | 335.1039 | 338.1834 | 385.3422 | 260.5704 | 235.0617 | 282.7676 | -0.44361 | 468.8237 | 647.9648 |
| YDR241W | 20.72808 | 29.66521 | 28.65365 | 28.65379 | 25.3498  | 17.61182 | -0.14244 | 92.19075 | 89.55611 |
| YMR132C | 435.2897 | 433.1121 | 396.2108 | 438.7612 | 474.7325 | 454.9721 | 0.113864 | 256.3353 | 199.3062 |
| YGL090W | 219.9479 | 243.2547 | 213.4203 | 254.3024 | 259.2593 | 176.1182 | 0.027575 | 540.7775 | 473.2426 |
| YDR377W | 2278.937 | 2137.873 | 2386.157 | 2303.944 | 2360.988 | 2041.993 | -0.02051 | 1804.465 | 1548.794 |
| YCR101C | 12.66716 | 2.966521 | 1.976114 | 8.95431  | 5.761317 | 4.892174 | 0.15505  | 29.23121 | 72.87409 |
| YGR033C | 1870.133 | 1772.991 | 1534.452 | 1620.73  | 1794.074 | 1679.972 | -0.02326 | 1225.462 | 903.4631 |
| YML097C | 538.9301 | 595.2819 | 637.2967 | 556.9581 | 616.461  | 656.5297 | 0.046825 | 1095.046 | 899.0731 |
| YHL030W | 571.1737 | 532.985  | 579.0013 | 510.3957 | 553.0865 | 689.7965 | 0.058883 | 930.9018 | 978.0932 |
| YNR044W | 1946.136 | 2183.36  | 2072.943 | 2595.855 | 2835.72  | 3089.897 | 0.458267 | 1405.347 | 1789.366 |
| YIL107C | 282.1322 | 207.6565 | 275.6679 | 241.7664 | 269.6297 | 317.9913 | 0.115726 | 436.2197 | 510.1186 |
| YEL048C | 392.6819 | 465.7438 | 396.2108 | 413.6891 | 483.9507 | 454.9721 | 0.108478 | 261.9567 | 236.1823 |
| YCR102W | 2.30312  | 4.944202 | 2.96417  | 2.686293 | 4.609054 | 0        | -0.48515 | 19.11272 | 28.09603 |
| YIL094C | 2769.502 | 2680.746 | 2838.687 | 2843.889 | 2743.539 | 2603.615 | -0.01714 | 3696.624 | 3644.582 |



|           |          |          |          |          |          |          |          |          |          |
|-----------|----------|----------|----------|----------|----------|----------|----------|----------|----------|
| YPR191W   | 6612.257 | 7219.524 | 6739.536 | 6975.408 | 6611.688 | 6069.231 | -0.06564 | 5223.393 | 5086.26  |
| YBR170C   | 679.4204 | 758.4406 | 670.8906 | 617.8474 | 594.5679 | 591.953  | -0.2249  | 976.9971 | 911.3651 |
| YNL331C   | 198.0683 | 221.5003 | 164.0174 | 163.8639 | 147.4897 | 182.9673 | -0.2395  | 62.95954 | 49.16806 |
| YDR078C   | 271.7681 | 177.0024 | 264.7992 | 264.1522 | 185.5144 | 226.0184 | -0.0787  | 82.07226 | 93.06811 |
| YCL009C   | 6915.117 | 6252.438 | 5935.257 | 6121.166 | 5793.581 | 5022.305 | -0.1736  | 10474.89 | 9199.695 |
| YHR094C   | 80.6092  | 89.98448 | 85.96094 | 76.11164 | 58.76544 | 70.4473  | -0.32136 | 263.0809 | 212.4763 |
| YDR298C   | 4705.274 | 4415.173 | 4404.757 | 4264.043 | 4149.301 | 3916.674 | -0.13348 | 3793.312 | 3252.994 |
| YLR005W   | 917.7933 | 950.2757 | 904.072  | 808.5742 | 907.9836 | 886.4619 | -0.09081 | 1258.066 | 1231.836 |
| YGR230W   | 176.1887 | 151.2926 | 115.6026 | 151.3278 | 182.0576 | 136.9809 | 0.086205 | 61.83526 | 65.85008 |
| YMR282C   | 813.0013 | 915.6662 | 843.8005 | 841.7052 | 788.1482 | 797.4243 | -0.08381 | 491.3093 | 539.9707 |
| YNL030W   | 14690.45 | 12643.31 | 13046.3  | 14013.5  | 14005.76 | 12647.25 | 0.010198 | 10232.05 | 8485.88  |
| YGL048C   | 3451.225 | 3594.435 | 3422.629 | 3596.051 | 3482.14  | 3662.281 | 0.037032 | 5051.379 | 4576.142 |
| YJR003C   | 644.8736 | 564.6279 | 686.6995 | 740.5215 | 759.3416 | 787.6399 | 0.270662 | 1082.679 | 1100.135 |
| YMR314W   | 4271.136 | 3639.922 | 3818.84  | 3876.321 | 3746.009 | 3552.696 | -0.06991 | 5441.503 | 5296.102 |
| YJL082W   | 505.5348 | 537.9292 | 534.5387 | 411.8983 | 479.3416 | 420.7269 | -0.26637 | 734.1532 | 746.3009 |
| YDR345C   | 4060.4   | 5371.381 | 4856.299 | 6110.421 | 5722.14  | 5194.51  | 0.253018 | 8599.598 | 8229.504 |
| YKL144C   | 1204.532 | 1078.825 | 1219.262 | 1142.57  | 1264.033 | 1300.34  | 0.081796 | 819.5983 | 740.1549 |
| YPR108W-f | 10.36404 | 17.79913 | 16.79697 | 38.50353 | 40.32922 | 19.56869 | 1.130033 | 0        | 1.756002 |
| YAR071W   | 207.2808 | 223.4779 | 154.1369 | 178.1908 | 124.4445 | 135.024  | -0.41837 | 60.71098 | 68.48408 |
| YDL200C   | 259.101  | 258.0874 | 222.3128 | 239.0801 | 251.1934 | 205.4713 | -0.08799 | 125.9191 | 134.3342 |
| YDR019C   | 1547.697 | 2032.067 | 1505.799 | 1618.939 | 1659.259 | 1374.701 | -0.12828 | 797.1127 | 842.881  |
| YBL058W   | 2966.418 | 2884.448 | 2970.099 | 2988.053 | 2737.778 | 2864.857 | -0.03816 | 3657.275 | 3785.941 |
| YDR524W-c | 15125.74 | 12222.07 | 13709.29 | 15462.3  | 14533.5  | 12323.39 | 0.04368  | 9941.986 | 9031.997 |
| YLR105C   | 1035.252 | 1073.881 | 993.9852 | 1018.105 | 1002.469 | 909.9443 | -0.08256 | 661.0752 | 633.0388 |
| YPL201C   | 57.578   | 39.55362 | 42.48644 | 34.02638 | 50.69959 | 41.09426 | -0.15012 | 15.73988 | 1.756002 |
| YML100W   | 1833.283 | 1659.274 | 1933.627 | 936.6209 | 871.1112 | 953.9738 | -0.97438 | 2158.613 | 2298.607 |
| YLR348C   | 435.2897 | 390.592  | 311.2379 | 317.878  | 299.5885 | 312.1207 | -0.29072 | 618.3526 | 502.2166 |
| YMR083W   | 6238     | 6650.941 | 5961.935 | 6482.921 | 6075.885 | 5848.104 | -0.03438 | 9876.778 | 8477.1   |
| YML083C   | 49.51708 | 80.09608 | 67.18786 | 57.30759 | 46.09054 | 55.77078 | -0.30618 | 134.9133 | 116.7741 |
| YMR286W   | 1402.6   | 1132.222 | 1068.089 | 1089.74  | 1073.91  | 974.521  | -0.19924 | 914.0376 | 782.299  |
| YFL017C   | 1316.233 | 1220.229 | 1176.776 | 1264.349 | 1346.996 | 1172.165 | 0.027047 | 888.1792 | 848.149  |
| YDL185W   | 12389.63 | 11825.54 | 12573.02 | 13164.63 | 12989.47 | 13654.06 | 0.113821 | 9265.171 | 9262.911 |
| YGR086C   | 19479.79 | 20630.18 | 19870.81 | 18033.09 | 17376.13 | 17367.22 | -0.18461 | 13977.02 | 14103.33 |
| YJR073C   | 4322.956 | 4085.889 | 4211.098 | 4084.061 | 4085.926 | 3700.44  | -0.08833 | 2956.85  | 2276.657 |
| YDR404C   | 2303.12  | 2044.922 | 2226.092 | 2145.453 | 2208.889 | 1869.789 | -0.07893 | 1455.939 | 1466.262 |
| YNL191W   | 2391.79  | 2513.632 | 2319.957 | 2469.599 | 2237.696 | 1912.84  | -0.12621 | 1379.488 | 1301.198 |
| YKL187C   | 386.9241 | 383.6701 | 365.581  | 237.2892 | 238.5185 | 303.3148 | -0.54426 | 120.2977 | 133.4562 |
| YMR174C   | 792.2732 | 866.2242 | 822.0633 | 723.5083 | 820.4116 | 641.8532 | -0.18252 | 529.5347 | 461.8286 |
| YEL057C   | 87.51856 | 139.4265 | 96.82957 | 95.81112 | 94.4856  | 84.14539 | -0.23849 | 287.815  | 266.0343 |
| YOL064C   | 1444.056 | 1429.863 | 1509.751 | 1670.874 | 1509.465 | 1479.393 | 0.088108 | 2104.647 | 1817.462 |
| YJR077C   | 8116.194 | 9674.815 | 8295.725 | 8742.989 | 8438.025 | 6856.87  | -0.11801 | 6342.049 | 5932.653 |
| YBR265W   | 2341.121 | 2471.112 | 2194.474 | 2335.284 | 2299.918 | 2321.826 | -0.01027 | 1647.067 | 1540.892 |
| YMR135C   | 514.7473 | 458.822  | 368.5452 | 322.3552 | 402.14   | 384.5248 | -0.27522 | 692.5549 | 679.5728 |
| YDR533C   | 806.092  | 754.4853 | 751.9112 | 1041.386 | 763.9507 | 805.2518 | 0.174929 | 1660.558 | 1247.64  |
| YJL098W   | 1429.086 | 1569.29  | 1462.324 | 1887.569 | 1789.465 | 2160.384 | 0.38806  | 1006.228 | 1229.202 |
| YLR052W   | 1108.952 | 1230.117 | 1199.501 | 1224.054 | 1161.482 | 1227.936 | 0.030219 | 911.789  | 784.933  |
| YOL077W-f | 1544.242 | 1337.901 | 1215.31  | 1261.662 | 1534.815 | 1308.167 | 0.00253  | 993.8613 | 1017.603 |
| YDR524C-f | 61834.16 | 56766.36 | 61549.02 | 62762.55 | 63621.08 | 58456.58 | 0.037084 | 47250.01 | 41125.57 |
| YER142C   | 210.7355 | 113.7166 | 111.6504 | 98.49741 | 70.28807 | 107.6278 | -0.65784 | 340.6561 | 296.7644 |
| YBR033W   | 342.0133 | 334.2281 | 349.7721 | 250.7207 | 276.5432 | 306.2501 | -0.29977 | 170.8902 | 168.5762 |
| YCL037C   | 525.1113 | 535.9515 | 613.5833 | 632.1743 | 506.9959 | 510.7429 | -0.02147 | 259.7081 | 312.5684 |
| YDR287W   | 269.465  | 277.8642 | 326.0588 | 285.6425 | 270.7819 | 274.9402 | -0.07114 | 573.3815 | 539.9707 |
| YAL016W   | 1615.639 | 1627.631 | 1759.729 | 1514.174 | 1564.774 | 1736.722 | -0.05506 | 2355.361 | 2319.679 |
| YKL140W   | 1019.131 | 936.4319 | 1105.636 | 933.9346 | 1055.473 | 988.2191 | -0.03993 | 1415.465 | 1536.502 |

|           |          |          |          |          |          |          |          |          |          |
|-----------|----------|----------|----------|----------|----------|----------|----------|----------|----------|
| YHR018C   | 1692.793 | 1916.373 | 1944.496 | 1772.953 | 1621.235 | 1648.662 | -0.1392  | 2193.465 | 2027.304 |
| YOL113W   | 312.0727 | 356.9714 | 413.9958 | 286.5379 | 301.893  | 328.7541 | -0.2398  | 478.9422 | 540.8487 |
| YAR028W   | 572.3253 | 528.0408 | 466.3628 | 535.4678 | 439.0124 | 439.3172 | -0.14818 | 957.8844 | 785.811  |
| YJR148W   | 5122.139 | 5484.109 | 4913.607 | 4945.466 | 4679.342 | 4524.282 | -0.13341 | 7975.624 | 7378.721 |
| YDR406W   | 965.0072 | 1018.506 | 991.021  | 627.6971 | 672.9219 | 907.009  | -0.43017 | 456.4567 | 500.4606 |
| YNR041C   | 794.5764 | 931.4877 | 705.4726 | 676.0504 | 793.9095 | 550.8587 | -0.26693 | 391.2486 | 286.2284 |
| YDL202W   | 1591.456 | 1580.167 | 1657.959 | 1542.828 | 1518.683 | 1397.205 | -0.11527 | 1242.327 | 1246.762 |
| YMR029C   | 618.3877 | 566.6056 | 671.8786 | 584.7165 | 568.0659 | 627.1767 | -0.06103 | 844.3324 | 916.6331 |
| YMR009W   | 2976.782 | 3142.535 | 2831.771 | 2860.007 | 2658.272 | 2296.386 | -0.19588 | 1758.37  | 1655.91  |
| YBL075C   | 1870.133 | 2221.924 | 1709.338 | 1654.757 | 1350.453 | 1417.752 | -0.39139 | 1011.85  | 921.9011 |
| YKL201C   | 1729.643 | 1948.016 | 2066.027 | 1935.026 | 1916.214 | 2440.216 | 0.131417 | 851.0781 | 1129.987 |
| YKL212W   | 2414.821 | 2312.898 | 2536.342 | 2612.868 | 2796.543 | 3070.328 | 0.223244 | 3598.812 | 3785.063 |
| YML098W   | 1365.75  | 1302.303 | 1298.307 | 1263.453 | 1276.708 | 1061.602 | -0.13911 | 809.4798 | 807.761  |
| YML108W   | 1036.404 | 944.3426 | 961.3793 | 1241.963 | 1130.37  | 954.9523 | 0.177487 | 725.159  | 618.1128 |
| YNL192W   | 1366.902 | 1389.321 | 1592.748 | 1583.122 | 1707.654 | 2116.354 | 0.314189 | 2296.899 | 2938.67  |
| YIR014W   | 29.94056 | 28.67637 | 50.3909  | 35.81724 | 41.48148 | 44.02956 | 0.154484 | 67.45665 | 122.9202 |
| YKR085C   | 1895.468 | 1538.636 | 1619.425 | 1618.044 | 1496.79  | 1610.504 | -0.09687 | 1319.902 | 1234.47  |
| YHL039W   | 1419.873 | 1473.372 | 1441.575 | 1553.573 | 1704.198 | 1825.759 | 0.229858 | 951.1387 | 1018.481 |
| YFL021W   | 705.9062 | 684.2776 | 707.4487 | 650.9784 | 670.6173 | 554.7725 | -0.16082 | 360.8931 | 323.1044 |
| YNL156C   | 3460.438 | 3774.404 | 3535.267 | 3328.317 | 3252.84  | 3082.069 | -0.15646 | 2423.942 | 2290.705 |
| YJR127C   | 543.5363 | 441.0228 | 570.1088 | 500.5459 | 527.7367 | 725.0201 | 0.173469 | 901.6705 | 1037.797 |
| YOR289W   | 456.0177 | 468.7104 | 516.7537 | 393.9897 | 395.2264 | 361.0424 | -0.32559 | 335.0347 | 342.4204 |
| YDR422C   | 549.2941 | 522.1077 | 576.0371 | 603.5205 | 603.7861 | 788.6184 | 0.276832 | 866.8179 | 997.4092 |
| YBR229C   | 827.9716 | 857.3247 | 1001.89  | 818.424  | 955.2264 | 1015.615 | 0.053789 | 1325.523 | 1448.702 |
| YBL107W-1 | 1.15156  | 0.98884  | 0        | 0.895431 | 0        | 0        | -1.25723 | 10.1185  | 21.07203 |
| YBL043W   | 168.1278 | 176.0136 | 191.683  | 158.4913 | 135.9671 | 93.92973 | -0.46426 | 52.84104 | 37.75405 |
| YCL040W   | 9441.64  | 10703.21 | 9678.017 | 8239.756 | 7285.762 | 7148.444 | -0.39538 | 14252.47 | 13972.51 |
| YPL193W   | 976.5228 | 917.6439 | 893.2034 | 974.229  | 962.14   | 976.4778 | 0.063525 | 608.2341 | 664.6468 |
| YFL036W   | 1204.532 | 1234.073 | 1302.259 | 996.6147 | 1032.428 | 1449.062 | -0.10507 | 1949.497 | 2174.809 |
| YJL164C   | 735.8468 | 560.6725 | 575.0491 | 376.081  | 342.2223 | 385.5033 | -0.76176 | 279.9451 | 268.6683 |
| YKL068W-1 | 1082.466 | 1369.544 | 1049.316 | 1078.099 | 1039.342 | 749.481  | -0.2884  | 529.5347 | 439.0005 |
| YGR240C   | 10782.06 | 10088.15 | 10900.24 | 10756.81 | 10891.19 | 12606.15 | 0.108594 | 15462.19 | 15450.18 |
| YOR303W   | 3075.817 | 3533.127 | 2936.505 | 2967.458 | 2752.757 | 2617.313 | -0.19519 | 1986.598 | 2038.718 |
| YOL055C   | 613.7814 | 600.2261 | 645.2011 | 584.7165 | 603.7861 | 514.6567 | -0.12648 | 292.3121 | 362.6144 |
| YLR025W   | 2064.747 | 2011.301 | 2117.406 | 2043.374 | 1875.885 | 2049.821 | -0.05324 | 2810.694 | 2872.82  |
| YOR117W   | 3097.696 | 3238.452 | 2998.752 | 3046.256 | 2977.449 | 2942.153 | -0.05819 | 4073.257 | 3922.031 |
| YLR350W   | 2896.173 | 2861.704 | 2704.312 | 2403.337 | 2346.008 | 2004.813 | -0.32525 | 3945.09  | 3401.376 |
| YAR068W   | 111.7013 | 117.672  | 140.3041 | 96.70655 | 47.2428  | 95.8866  | -0.62422 | 30.35549 | 26.34003 |
| YGL141W   | 428.3803 | 387.6254 | 453.5181 | 326.8323 | 326.0906 | 377.6758 | -0.3008  | 561.0145 | 618.1128 |
| YNL179C   | 18.42496 | 19.77681 | 9.880568 | 20.59491 | 17.28395 | 10.76278 | 0.016685 | 46.09538 | 62.33808 |
| YOR212W   | 3301.522 | 3383.812 | 3153.877 | 3031.034 | 2940.576 | 3432.349 | -0.06527 | 4446.517 | 4214.405 |
| YPL084W   | 1088.224 | 1008.617 | 1198.513 | 1012.732 | 1017.449 | 1136.941 | -0.05726 | 1645.942 | 1561.964 |
| YNR035C   | 3238.187 | 2692.613 | 3231.934 | 3132.218 | 2829.959 | 2688.739 | -0.08293 | 4361.072 | 4479.561 |
| YMR110C   | 2337.667 | 2220.936 | 2269.567 | 1944.876 | 1877.037 | 2183.866 | -0.18515 | 1481.798 | 1411.826 |
| YDR031W   | 271.7681 | 262.0427 | 263.8112 | 253.407  | 229.3004 | 263.1989 | -0.09671 | 127.0434 | 175.6002 |
| YOR323C   | 2657.8   | 2730.188 | 2677.634 | 2732.855 | 2658.272 | 2852.137 | 0.03143  | 3919.231 | 3551.514 |
| YGL183C   | 58.72956 | 55.37506 | 85.96094 | 58.20302 | 65.67902 | 55.77078 | -0.15526 | 25.85838 | 10.53601 |
| YHR114W   | 670.2079 | 708.0098 | 715.3531 | 677.8413 | 682.14   | 855.1519 | 0.081428 | 1220.965 | 1110.671 |
| YDL147W   | 3247.399 | 3317.56  | 3258.611 | 3199.375 | 3171.029 | 3554.653 | 0.014828 | 4555.572 | 4476.927 |
| YKL132C   | 61.03268 | 51.4197  | 77.06843 | 59.99388 | 58.76544 | 69.46886 | -0.00987 | 155.1503 | 129.0662 |
| YKL143W   | 2615.193 | 2534.398 | 2595.625 | 3062.374 | 2902.552 | 3009.665 | 0.212541 | 2146.246 | 2097.545 |
| YKL089W   | 321.2852 | 385.6478 | 343.8438 | 337.5775 | 312.2634 | 378.6542 | -0.03092 | 587.9971 | 589.1387 |
| YCR053W   | 6479.828 | 6246.505 | 6413.477 | 6706.778 | 6710.782 | 6694.45  | 0.071481 | 8432.081 | 8417.396 |
| YDR039C   | 4.60624  | 13.84377 | 13.8328  | 4.477155 | 10.37037 | 7.827478 | -0.50966 | 58.46243 | 31.60804 |

|                   |          |          |          |          |          |          |          |          |          |
|-------------------|----------|----------|----------|----------|----------|----------|----------|----------|----------|
| YGR019W           | 1723.885 | 1724.538 | 1644.127 | 1305.538 | 1457.613 | 1249.461 | -0.34385 | 945.5174 | 940.3392 |
| YER096W           | 119.7622 | 188.8685 | 136.3518 | 102.9746 | 95.63787 | 93.92973 | -0.6051  | 57.33815 | 46.53406 |
| YGR124W           | 7508.171 | 7180.959 | 7182.185 | 7081.069 | 6649.712 | 7065.277 | -0.07273 | 10413.06 | 9424.464 |
| YNL173C           | 3684.992 | 3524.227 | 3524.399 | 3103.564 | 2703.21  | 2870.727 | -0.30678 | 2378.971 | 2335.483 |
| YLR009W           | 5883.32  | 5889.534 | 5093.433 | 6630.667 | 6395.062 | 5504.674 | 0.135752 | 4569.064 | 4372.445 |
| YOR348C           | 1070.951 | 1686.962 | 1121.444 | 663.5144 | 704.033  | 481.3899 | -1.06912 | 351.8989 | 388.9545 |
| YJL128C           | 1083.618 | 1049.16  | 1036.472 | 980.497  | 1017.449 | 1227.936 | 0.025552 | 1434.578 | 1489.968 |
| YNL180C           | 2429.791 | 2312.898 | 2271.543 | 2191.12  | 2329.877 | 2096.786 | -0.08394 | 1540.26  | 1618.156 |
| YDR368W           | 2847.808 | 2536.376 | 2698.383 | 2653.162 | 2836.873 | 2592.852 | 5.71E-05 | 3842.78  | 3547.124 |
| YMR189W           | 1574.182 | 2229.835 | 1783.443 | 1732.659 | 1609.712 | 1689.757 | -0.15102 | 764.5087 | 726.9849 |
| YMR004W           | 936.2182 | 946.3203 | 992.0091 | 937.5163 | 971.3581 | 980.3916 | 0.007368 | 1359.251 | 1387.242 |
| YPR069C           | 2974.479 | 2594.717 | 2851.532 | 2864.484 | 2922.14  | 2658.407 | 0.004158 | 4733.208 | 3937.835 |
| YBR201C- <i>+</i> | 115.156  | 166.1252 | 96.82957 | 72.52991 | 92.18108 | 74.36104 | -0.66136 | 287.815  | 208.9643 |
| YPL271W           | 2274.331 | 1870.886 | 1831.857 | 1871.451 | 1886.255 | 1746.506 | -0.1189  | 1566.119 | 1313.49  |
| YPL183C           | 1712.37  | 1991.525 | 1939.556 | 2019.197 | 2183.539 | 2166.254 | 0.174487 | 1416.59  | 1444.312 |
| YMR317W           | 158.9153 | 188.8685 | 195.6353 | 160.2822 | 147.4897 | 170.2476 | -0.185   | 281.0694 | 273.9363 |
| YIL105C           | 629.9033 | 569.5721 | 722.2695 | 526.5134 | 527.7367 | 663.3787 | -0.162   | 882.5578 | 976.3372 |
| YKL029C           | 2323.848 | 3258.229 | 2666.765 | 3369.507 | 3552.428 | 3380.492 | 0.320721 | 3702.246 | 4240.745 |
| YDR475C           | 538.9301 | 651.6458 | 696.5801 | 630.3834 | 644.1153 | 708.3867 | 0.071388 | 896.0492 | 1093.111 |
| YHR169W           | 2003.714 | 2470.123 | 2220.164 | 2788.372 | 2741.235 | 2585.025 | 0.277657 | 1702.156 | 1746.344 |
| YNL058C           | 648.3282 | 628.9025 | 651.1294 | 777.2341 | 715.5556 | 613.4786 | 0.127315 | 1053.448 | 980.7272 |
| YLR433C           | 665.6016 | 708.9986 | 636.3086 | 656.3509 | 634.8972 | 703.4946 | -0.01165 | 1075.934 | 880.6351 |
| YPL221W           | 1697.399 | 1869.897 | 1816.048 | 1645.802 | 1635.062 | 1780.751 | -0.08891 | 2355.361 | 2619.077 |
| YDR115W           | 624.1455 | 589.3489 | 521.694  | 599.0434 | 601.4815 | 603.6942 | 0.056282 | 421.6041 | 400.3685 |
| YJR114W           | 27.63744 | 32.63173 | 21.73725 | 25.9675  | 26.50206 | 20.54713 | -0.16751 | 5.621387 | 2.634003 |
| YGR194C           | 579.2346 | 517.1635 | 515.7657 | 372.4993 | 373.3334 | 455.9506 | -0.42382 | 833.0896 | 797.225  |
| YLR179C           | 5222.324 | 4889.816 | 4589.524 | 5229.317 | 5184.033 | 4340.336 | 0.005096 | 7836.214 | 6714.952 |
| YCL057C- <i>+</i> | 2774.108 | 2236.757 | 2510.652 | 2444.527 | 2493.498 | 2217.133 | -0.07204 | 2069.795 | 1842.046 |
| YOR226C           | 776.1514 | 752.5076 | 850.7169 | 989.4513 | 1118.848 | 978.4347 | 0.375498 | 513.7948 | 487.2906 |
| YDR127W           | 2546.099 | 2403.871 | 2472.118 | 2410.5   | 2646.749 | 2665.256 | 0.057244 | 1670.676 | 1717.37  |
| YDR145W           | 1582.243 | 1306.258 | 1632.27  | 1618.939 | 1791.77  | 2101.678 | 0.286108 | 2662.289 | 2585.713 |
| YCL054W           | 3483.469 | 3925.697 | 3513.53  | 4401.043 | 4635.556 | 4619.19  | 0.322184 | 2835.428 | 3225.776 |
| YLR364W           | 437.5928 | 497.3867 | 349.7721 | 530.0952 | 451.6873 | 360.064  | 0.06273  | 214.737  | 179.1122 |
| YPR103W           | 2958.357 | 2911.146 | 2882.162 | 2753.45  | 3048.889 | 2857.029 | -0.0153  | 3777.572 | 3672.678 |
| YCR018C- <i>+</i> | 38.00148 | 42.52014 | 42.48644 | 30.44465 | 39.17696 | 35.22365 | -0.23049 | 11.24277 | 1.756002 |
| YLL028W           | 1787.221 | 2439.469 | 1901.021 | 2263.65  | 1948.478 | 1918.71  | 0.000736 | 1131.023 | 1331.928 |
| YNL106C           | 383.4695 | 371.804  | 420.9122 | 402.0485 | 353.7449 | 446.1662 | 0.031273 | 580.1272 | 636.5508 |
| YNL038W           | 998.4025 | 878.0903 | 849.7289 | 885.5813 | 825.0206 | 764.1575 | -0.13961 | 574.5058 | 527.6786 |
| YKL015W           | 584.9924 | 472.6657 | 552.3238 | 484.4282 | 511.605  | 604.6727 | -0.00834 | 811.7283 | 929.8031 |
| YNL306W           | 1726.188 | 1612.799 | 1699.458 | 1360.16  | 1406.914 | 1288.599 | -0.31304 | 1288.422 | 1057.113 |
| YGL047W           | 591.9018 | 431.1344 | 470.315  | 401.1531 | 357.2017 | 379.6327 | -0.39207 | 1003.98  | 721.7169 |
| YCL043C           | 18575.81 | 16957.62 | 17455.01 | 19771.12 | 19523.95 | 17783.05 | 0.10726  | 27538.05 | 24044.94 |
| YGR039W           | 141.6419 | 135.4711 | 72.12815 | 130.7329 | 106.0082 | 90.01599 | -0.096   | 32.60405 | 26.34003 |
| YER043C           | 24500.59 | 28538.92 | 26382.11 | 28091.46 | 27957.37 | 26172.15 | 0.049975 | 19036.27 | 19597.86 |
| YPL002C           | 564.2644 | 607.148  | 661.9981 | 605.3114 | 596.8725 | 635.9826 | 0.003738 | 376.633  | 364.3704 |
| YMR169C           | 1127.377 | 1214.296 | 993.9852 | 843.496  | 866.5021 | 794.489  | -0.41346 | 807.2312 | 735.7649 |
| YJL156W- <i>+</i> | 211.887  | 210.623  | 179.8263 | 166.5502 | 203.9506 | 177.0967 | -0.13745 | 124.7948 | 76.38609 |
| YNL279W           | 249.8885 | 297.641  | 224.2889 | 217.5897 | 212.0165 | 238.7381 | -0.20767 | 102.3093 | 142.2362 |
| YNR019W           | 5879.865 | 8648.398 | 6109.155 | 7247.619 | 7183.21  | 6542.793 | 0.023313 | 3805.679 | 3736.773 |
| YIL097W           | 162.37   | 191.835  | 183.7786 | 156.7004 | 130.2058 | 130.1318 | -0.36738 | 287.815  | 341.5424 |
| YGR176W           | 70.24516 | 53.39738 | 52.36701 | 67.15733 | 58.76544 | 47.9433  | -0.01768 | 19.11272 | 17.56002 |
| YOR353C           | 649.4798 | 619.0141 | 636.3086 | 575.7621 | 649.8766 | 755.3516 | 0.05658  | 944.3931 | 965.8012 |
| YGL227W           | 329.3461 | 300.6075 | 295.429  | 207.74   | 215.4733 | 301.3579 | -0.35292 | 475.5694 | 515.3866 |
| YBR267W           | 2503.491 | 2601.639 | 2203.367 | 3094.61  | 2674.404 | 2488.159 | 0.176073 | 2049.558 | 1735.808 |

|           |          |          |          |          |          |          |          |          |          |
|-----------|----------|----------|----------|----------|----------|----------|----------|----------|----------|
| YGL180W   | 78.30608 | 114.7055 | 79.04455 | 99.39284 | 61.06996 | 91.97286 | -0.10799 | 174.263  | 166.8202 |
| YGR146C   | 202.6745 | 254.132  | 258.8709 | 210.4263 | 254.6502 | 223.0831 | -0.05657 | 410.3613 | 379.2965 |
| YGL160W   | 1129.68  | 1291.426 | 1169.859 | 1112.125 | 1139.589 | 1008.766 | -0.13929 | 776.8757 | 646.2088 |
| YEL060C   | 5291.418 | 6590.621 | 5613.151 | 5255.285 | 5288.889 | 5347.146 | -0.13872 | 7306.679 | 7635.975 |
| YBR236C   | 877.4887 | 744.5968 | 996.9493 | 828.2737 | 786.9959 | 868.85   | -0.0763  | 1358.127 | 1316.124 |
| YLR304C   | 7159.248 | 7866.226 | 7278.027 | 7141.062 | 7050.7   | 7222.805 | -0.05868 | 5544.937 | 5639.401 |
| YPL222W   | 257.9494 | 347.083  | 274.6798 | 291.0151 | 258.107  | 275.9186 | -0.09257 | 134.9133 | 149.2602 |
| YJL001W   | 3034.36  | 2412.771 | 2626.255 | 2445.422 | 2491.194 | 2380.532 | -0.14189 | 3956.332 | 3585.756 |
| YGL208W   | 228.0089 | 166.1252 | 179.8263 | 150.4324 | 144.0329 | 164.377  | -0.32295 | 88.81792 | 71.99609 |
| YAL068C   | 25.33432 | 31.64289 | 13.8328  | 12.53603 | 18.43622 | 11.74122 | -0.72926 | 3.372832 | 1.756002 |
| YGR215W   | 611.4783 | 517.1635 | 610.6191 | 556.0627 | 558.8478 | 478.4546 | -0.1264  | 408.1127 | 333.6404 |
| YOR367W   | 960.401  | 853.3693 | 829.9677 | 872.1498 | 852.675  | 779.8125 | -0.07798 | 607.1098 | 597.0407 |
| YBL022C   | 2405.609 | 2306.965 | 2599.578 | 2324.539 | 2465.844 | 2933.347 | 0.079002 | 3291.884 | 3738.529 |
| YER083C   | 2009.472 | 2128.973 | 1990.935 | 2027.256 | 2026.831 | 1908.926 | -0.0397  | 2975.962 | 2596.249 |
| YHR104W   | 1273.625 | 1130.245 | 1173.812 | 983.1833 | 997.8602 | 948.1032 | -0.28854 | 2030.445 | 1699.81  |
| YOR157C   | 3370.616 | 3208.787 | 3100.522 | 3031.929 | 3097.284 | 2775.819 | -0.12037 | 4180.064 | 4093.241 |
| YPL024W   | 756.5749 | 706.0321 | 728.1979 | 634.8606 | 677.5309 | 483.3467 | -0.28688 | 428.3497 | 367.8825 |
| YPL036W   | 126.6716 | 181.9466 | 183.7786 | 198.7857 | 182.0576 | 184.9242 | 0.200388 | 64.08382 | 89.55611 |
| YLR019W   | 1152.711 | 1414.042 | 1290.402 | 1297.48  | 1239.835 | 1284.685 | -0.01321 | 771.2544 | 787.567  |
| YHR087W   | 4735.214 | 3965.25  | 4120.197 | 2219.774 | 2189.301 | 1956.869 | -1.01002 | 3326.737 | 2528.643 |
| YPL041C   | 479.0489 | 439.0452 | 400.163  | 440.5521 | 477.0371 | 388.4386 | -0.01345 | 234.974  | 232.6703 |
| YGL259W   | 0        | 0        | 0        | 0        | 0        | 0        | #DIV/0!  | 10.1185  | 11.41401 |
| YJR025C   | 80.6092  | 122.6162 | 136.3518 | 138.7918 | 138.2716 | 94.90817 | 0.131453 | 273.1994 | 280.9603 |
| YPR184W   | 2839.747 | 3099.026 | 2861.413 | 2389.01  | 2374.815 | 2452.936 | -0.28618 | 2087.783 | 2230.123 |
| YDR055W   | 1928.863 | 2121.063 | 2047.254 | 2236.787 | 2269.959 | 2075.26  | 0.110385 | 1362.624 | 1343.342 |
| YDR542W   | 50.66864 | 27.68753 | 33.59393 | 34.02638 | 32.26338 | 23.48243 | -0.31852 | 0        | 9.658012 |
| YML034W   | 880.9434 | 825.6818 | 858.6214 | 666.2007 | 761.6462 | 822.8636 | -0.18872 | 1138.893 | 1209.885 |
| YIL014W   | 840.6388 | 873.1461 | 761.7918 | 801.4108 | 878.0248 | 1017.572 | 0.123595 | 449.711  | 532.9467 |
| YDR329C   | 1318.536 | 1162.876 | 1267.677 | 1263.453 | 1308.971 | 1173.143 | -0.00136 | 1681.919 | 1714.736 |
| YIR033W   | 1269.019 | 1277.582 | 1342.769 | 1384.336 | 1512.922 | 1910.883 | 0.305943 | 1886.538 | 2089.643 |
| YIL139C   | 490.5645 | 382.6812 | 387.3183 | 435.1795 | 457.4486 | 406.0504 | 0.042975 | 206.8671 | 252.8643 |
| YDL194W   | 171.5824 | 170.0806 | 164.0174 | 123.5695 | 102.5514 | 138.9377 | -0.4701  | 283.3179 | 245.8403 |
| YOL103W   | 1087.073 | 1346.801 | 1251.868 | 1296.584 | 1307.819 | 1389.377 | 0.1158   | 1743.754 | 1914.92  |
| YOR051C   | 5053.045 | 5073.74  | 5188.286 | 5733.445 | 5133.334 | 5295.289 | 0.07766  | 3783.194 | 3776.283 |
| YML081C-1 | 1497.028 | 1087.724 | 1308.187 | 1227.636 | 1400     | 1351.218 | 0.031493 | 1110.786 | 824.443  |
| YDR432W   | 3028.603 | 4005.793 | 3758.568 | 4022.276 | 3800.165 | 3855.033 | 0.113637 | 4899.601 | 5271.518 |
| YHR210C   | 67.94204 | 49.44202 | 66.19981 | 56.41215 | 57.61317 | 67.512   | -0.01617 | 105.6821 | 151.0162 |
| YIL169C   | 1702.006 | 1847.154 | 1821.977 | 1788.176 | 1759.506 | 1967.632 | 0.038216 | 1251.321 | 1486.456 |
| YLR341W   | 95.57947 | 105.8059 | 95.84151 | 79.69336 | 77.20165 | 97.84347 | -0.22255 | 210.2399 | 165.0642 |
| YFR052W   | 1767.645 | 1727.504 | 1830.869 | 1684.306 | 1652.346 | 1553.754 | -0.1231  | 2377.847 | 2411.869 |
| YNR076W   | 2.30312  | 0        | 0        | 0        | 0        | 0        | #NUM!    | 8.99422  | 7.90201  |
| YDR376W   | 831.4263 | 855.347  | 737.0904 | 748.5803 | 707.4898 | 765.1359 | -0.12597 | 517.1676 | 467.0966 |
| YFL030W   | 241.8276 | 442.0117 | 350.7602 | 275.7928 | 315.7202 | 227.9753 | -0.33628 | 150.6532 | 107.9941 |
| YGR239C   | 622.9939 | 673.4003 | 596.7863 | 593.6708 | 587.6544 | 483.3467 | -0.18557 | 371.0116 | 382.8085 |
| YIL116W   | 1275.928 | 1315.158 | 1326.96  | 1580.436 | 1542.881 | 1484.285 | 0.233882 | 1848.312 | 1813.072 |
| YPR133W-1 | 1691.642 | 1492.16  | 1380.315 | 1378.964 | 1546.338 | 1510.703 | -0.04107 | 1278.303 | 1138.767 |
| YLR174W   | 140.4903 | 145.3595 | 98.80568 | 119.9878 | 133.6626 | 101.7572 | -0.11409 | 44.9711  | 52.68006 |
| YCR052W   | 1642.124 | 1644.442 | 1597.688 | 1787.28  | 1677.696 | 1738.678 | 0.091387 | 2000.09  | 2137.933 |
| YPR030W   | 92.1248  | 96.90636 | 96.82957 | 77.00707 | 89.87655 | 46.96487 | -0.41872 | 204.6185 | 214.2323 |
| YBL071C   | 363.8929 | 370.8152 | 287.5245 | 427.1206 | 371.0288 | 309.1854 | 0.115368 | 223.7312 | 173.8442 |
| YLR050C   | 1938.075 | 1723.549 | 1842.726 | 1789.967 | 1965.761 | 1858.048 | 0.028399 | 1495.289 | 1227.446 |
| YPR020W   | 1788.373 | 1668.174 | 1659.935 | 1588.495 | 1592.428 | 1392.313 | -0.16194 | 1237.83  | 1100.135 |
| YGR038W   | 910.8839 | 882.0457 | 847.7528 | 785.293  | 882.6338 | 769.0497 | -0.11582 | 625.0983 | 514.5086 |
| YGL150C   | 1506.24  | 1290.437 | 1527.536 | 1584.017 | 1479.506 | 2084.066 | 0.251459 | 2213.702 | 2821.895 |

|           |          |          |          |          |          |          |          |          |          |
|-----------|----------|----------|----------|----------|----------|----------|----------|----------|----------|
| YKL094W   | 2387.184 | 2593.728 | 2634.159 | 2586.005 | 2433.58  | 2330.631 | -0.05107 | 1865.176 | 1708.59  |
| YGR200C   | 1931.166 | 2267.411 | 2050.218 | 2501.834 | 2488.889 | 2541.973 | 0.269588 | 1554.876 | 1713.858 |
| YKL156W   | 5283.357 | 4701.936 | 4638.927 | 5243.644 | 5452.511 | 4904.893 | 0.093283 | 4343.084 | 3562.05  |
| YGL037C   | 14624.81 | 13051.7  | 13793.27 | 11570.76 | 10872.76 | 10013.3  | -0.35354 | 21649.09 | 19316.9  |
| YHR007C   | 34531.83 | 41265.3  | 38269.42 | 43312.89 | 43047.41 | 41649.03 | 0.166373 | 28164.28 | 28854.63 |
| YGR253C   | 3231.277 | 2584.829 | 3074.833 | 2981.785 | 2775.803 | 2710.264 | -0.07034 | 4544.33  | 4093.241 |
| YDL192W   | 13581.5  | 10437.21 | 12172.86 | 12822.57 | 13132.35 | 11998.54 | 0.068578 | 10042.05 | 8953.855 |
| YDR261C   | 1266.716 | 1119.367 | 1336.841 | 1291.212 | 1329.712 | 1405.032 | 0.112895 | 1837.069 | 1754.246 |
| YOR076C   | 404.1975 | 397.5139 | 424.8644 | 435.1795 | 382.5515 | 487.2605 | 0.089404 | 598.1156 | 649.7208 |
| YLR377C   | 194.6136 | 202.7123 | 152.1608 | 137.8964 | 106.0082 | 110.5631 | -0.63243 | 84.32081 | 53.55807 |
| YPL246C   | 2766.047 | 3049.584 | 2556.103 | 3068.642 | 3070.782 | 2406.949 | 0.029786 | 2083.286 | 1754.246 |
| YGR174W-1 | 12.66716 | 22.74333 | 5.928341 | 9.849741 | 14.97943 | 20.54713 | 0.134441 | 66.33237 | 61.46008 |
| YOL155W-1 | 12.66716 | 5.933043 | 11.85668 | 9.849741 | 8.065844 | 5.870608 | -0.35664 | 67.45665 | 34.24204 |
| YMR209C   | 982.2806 | 963.1306 | 872.4542 | 963.4838 | 1018.601 | 935.3836 | 0.050114 | 677.9393 | 648.8428 |
| YCL057W   | 1531.575 | 1668.174 | 1687.601 | 1547.305 | 1533.663 | 1684.865 | -0.03632 | 2113.642 | 2221.343 |
| YFR026C   | 82.91232 | 79.10723 | 81.02066 | 60.88931 | 63.37449 | 92.9513  | -0.16207 | 31.47977 | 20.19402 |
| YOR145C   | 3818.573 | 3659.698 | 3229.958 | 3859.308 | 3943.046 | 3540.955 | 0.083122 | 2938.861 | 2607.663 |
| YHR003C   | 1706.612 | 1823.422 | 1712.302 | 2026.36  | 1920.823 | 1758.247 | 0.122126 | 1299.665 | 1307.344 |
| YAL060W   | 2265.118 | 2360.362 | 2290.316 | 1969.053 | 1742.222 | 1547.884 | -0.39506 | 1830.324 | 1824.486 |
| YOR019W   | 275.2228 | 295.6633 | 230.2172 | 262.3613 | 251.1934 | 198.6222 | -0.16975 | 151.7775 | 119.4081 |
| YKL130C   | 1380.72  | 1247.917 | 1129.349 | 1180.178 | 1151.111 | 1079.213 | -0.13998 | 791.4913 | 726.9849 |
| YGL043W   | 1515.453 | 1422.941 | 1601.64  | 1592.076 | 1340.082 | 1479.393 | -0.04142 | 1961.864 | 2108.959 |
| YNL244C   | 11775.85 | 9933.891 | 10479.33 | 11100.66 | 11621.73 | 9742.274 | 0.012299 | 9054.931 | 7556.077 |
| YLR400W   | 72.54828 | 59.33043 | 64.22369 | 87.75224 | 53.00412 | 74.36104 | 0.133517 | 23.60983 | 29.85204 |
| YOL126C   | 1118.165 | 1427.886 | 1254.832 | 1167.642 | 1041.646 | 915.8149 | -0.28243 | 1629.078 | 1814.828 |
| YDR111C   | 356.9836 | 368.8375 | 343.8438 | 282.0608 | 306.5021 | 359.0855 | -0.17474 | 581.2515 | 546.1167 |
| YLR106C   | 2433.246 | 2065.688 | 2518.557 | 2342.448 | 2941.729 | 2896.167 | 0.221206 | 3714.613 | 4195.967 |
| YLR257W   | 4911.403 | 4554.599 | 4739.709 | 4215.689 | 3673.416 | 3565.416 | -0.31055 | 6804.127 | 6030.111 |
| YMR165C   | 686.3297 | 712.954  | 693.6159 | 671.5733 | 647.5721 | 739.6966 | -0.02367 | 905.0434 | 991.2632 |
| YGL073W   | 594.2049 | 544.8511 | 623.4639 | 479.0556 | 601.4815 | 734.8045 | 0.042602 | 875.8122 | 1060.625 |
| YBR273C   | 1114.71  | 1131.233 | 1167.883 | 1146.152 | 1049.712 | 1107.588 | -0.04742 | 1618.96  | 1452.214 |
| YGR243W   | 278.6775 | 325.3285 | 245.0381 | 100.2883 | 71.44034 | 62.61982 | -1.85718 | 498.0549 | 341.5424 |
| YOR007C   | 6794.204 | 6130.811 | 6423.357 | 6614.549 | 6531.029 | 6152.397 | -0.00376 | 9097.653 | 8312.914 |
| YKR061W   | 611.4783 | 656.59   | 606.6669 | 661.7235 | 736.2964 | 575.3196 | 0.073952 | 404.7399 | 425.8305 |
| YKL016C   | 4648.847 | 4311.344 | 4403.769 | 4036.603 | 4151.605 | 3451.918 | -0.19924 | 3439.165 | 3029.982 |
| YGR130C   | 2874.294 | 2489.9   | 3294.181 | 2456.167 | 2545.35  | 3209.266 | -0.07658 | 3891.124 | 4646.382 |
| YNR072W   | 32.24368 | 9.888404 | 21.73725 | 17.90862 | 16.13169 | 29.35304 | -0.01079 | 60.71098 | 93.06811 |
| YBR082C   | 10243.13 | 8886.709 | 9403.337 | 10029.72 | 9623.704 | 9152.278 | 0.013714 | 14545.9  | 13227.96 |
| YLR324W   | 853.3059 | 980.9297 | 936.6779 | 808.5742 | 754.7326 | 671.2062 | -0.3104  | 1216.468 | 1123.841 |
| YHR196W   | 2708.469 | 2915.102 | 3075.821 | 3529.789 | 3789.795 | 3842.313 | 0.359596 | 2456.546 | 2609.419 |
| YMR103C   | 242.9791 | 222.4891 | 217.3725 | 150.4324 | 167.0782 | 131.1103 | -0.60605 | 406.9884 | 336.2744 |
| YDR452W   | 3080.423 | 2874.559 | 3283.313 | 2911.942 | 2788.478 | 3175.021 | -0.05781 | 2014.705 | 2310.021 |
| YEL047C   | 2402.154 | 2674.813 | 2442.476 | 2447.213 | 2147.819 | 2128.096 | -0.16149 | 3282.89  | 3067.736 |
| YDL131W   | 2160.326 | 2182.371 | 2185.582 | 2428.409 | 2371.358 | 2304.214 | 0.121925 | 2829.806 | 2671.757 |
| YLR145W   | 602.2658 | 481.5653 | 534.5387 | 527.4089 | 579.5885 | 534.2254 | 0.02023  | 354.1474 | 353.8344 |
| YJL108C   | 994.9478 | 1005.651 | 917.9048 | 580.2393 | 521.9754 | 571.4059 | -0.80226 | 1070.312 | 1037.797 |
| YBR195C   | 639.1158 | 672.4115 | 572.0849 | 732.4626 | 757.0371 | 693.7102 | 0.212949 | 498.0549 | 429.3425 |
| YBR296C-1 | 17.2734  | 34.60942 | 27.66559 | 11.6406  | 10.37037 | 7.827478 | -1.41466 | 0        | 0.878001 |
| YDR177W   | 3121.879 | 2519.565 | 2756.679 | 2682.711 | 2622.552 | 2405.971 | -0.12311 | 2045.061 | 1905.262 |
| YLR213C   | 529.7176 | 541.8846 | 464.3867 | 535.4678 | 382.5515 | 386.4817 | -0.23567 | 220.3584 | 214.2323 |
| YLR114C   | 1075.557 | 1028.394 | 1181.716 | 1118.393 | 1182.222 | 1470.587 | 0.198839 | 1557.124 | 1709.468 |
| YNL062C   | 2275.482 | 2354.429 | 2222.14  | 2916.419 | 2772.346 | 2802.237 | 0.309399 | 2076.541 | 1856.972 |
| YNL035C   | 613.7814 | 720.8647 | 639.2728 | 702.0179 | 630.2881 | 577.2765 | -0.04781 | 390.1243 | 389.8325 |
| YJL013C   | 449.1084 | 447.9447 | 391.2705 | 412.7937 | 418.2716 | 408.0073 | -0.05623 | 648.7081 | 616.3568 |

|         |          |          |          |          |          |          |          |          |          |
|---------|----------|----------|----------|----------|----------|----------|----------|----------|----------|
| YER080W | 1179.197 | 1152.988 | 1262.737 | 1229.427 | 1214.486 | 1036.162 | -0.04684 | 1605.468 | 1772.684 |
| YBR065C | 176.1887 | 163.1587 | 236.1456 | 201.472  | 171.6873 | 271.0264 | 0.162678 | 294.5607 | 474.9986 |
| YGL191W | 5825.742 | 5498.942 | 5538.059 | 5429.894 | 5795.885 | 5123.084 | -0.04465 | 4883.861 | 4449.709 |
| YBR210W | 314.3759 | 323.3508 | 341.8677 | 286.5379 | 291.5227 | 323.8619 | -0.11918 | 514.9191 | 508.3626 |
| YER045C | 485.9583 | 428.1679 | 536.5149 | 511.2911 | 520.8231 | 522.4841 | 0.099851 | 596.9913 | 732.2529 |
| YFL052W | 74.8514  | 90.97332 | 67.18786 | 49.24871 | 61.06996 | 46.96487 | -0.56704 | 125.9191 | 139.6022 |
| YIL051C | 5444.575 | 5438.622 | 5184.334 | 5592.862 | 5431.77  | 4660.285 | -0.03477 | 8532.142 | 7224.193 |
| YGL251C | 116.3076 | 149.3149 | 127.4593 | 75.21621 | 88.72429 | 63.59826 | -0.78872 | 238.3468 | 187.0142 |
| YHR082C | 1158.469 | 897.8671 | 1133.301 | 888.2676 | 999.0124 | 1238.698 | -0.02908 | 1629.078 | 1837.656 |
| YGL058W | 1164.227 | 1106.512 | 1084.886 | 1214.204 | 1107.325 | 953.9738 | -0.03487 | 1684.168 | 1588.304 |
| YBR149W | 8930.347 | 8517.871 | 8168.266 | 7709.661 | 7502.387 | 7913.58  | -0.14758 | 6897.442 | 6033.623 |
| YDR284C | 2020.988 | 2018.223 | 1960.305 | 1905.477 | 1822.881 | 1878.595 | -0.09763 | 1412.093 | 1196.715 |
| YJR008W | 307.4665 | 291.7079 | 243.062  | 219.3806 | 188.9712 | 162.4202 | -0.56131 | 417.1069 | 467.9746 |
| YDL167C | 2140.75  | 2107.219 | 2080.848 | 2398.86  | 2737.778 | 2719.07  | 0.311806 | 1553.751 | 1823.608 |
| YKL182W | 24835.69 | 24832.75 | 25407.88 | 27462.87 | 28024.2  | 32244.32 | 0.224735 | 19013.78 | 18366.9  |
| YDR071C | 2923.811 | 2618.449 | 2745.81  | 2773.15  | 2778.107 | 2693.631 | -0.00754 | 4094.619 | 3616.486 |
| YHL014C | 441.0475 | 480.5765 | 406.0914 | 386.8262 | 450.535  | 342.4522 | -0.17039 | 286.6908 | 273.9363 |
| YNL054W | 578.0831 | 580.4493 | 677.807  | 553.3764 | 557.6955 | 653.5944 | -0.05744 | 782.4971 | 821.809  |
| YLR450W | 1847.102 | 1405.142 | 1713.291 | 1553.573 | 1700.741 | 1812.061 | 0.029005 | 2607.199 | 2467.183 |
| YHR202W | 482.5036 | 556.7172 | 441.6614 | 441.4475 | 472.428  | 542.0528 | -0.02452 | 303.5549 | 319.5924 |
| YMR140W | 219.9479 | 247.2101 | 266.7753 | 218.4852 | 215.4733 | 292.552  | -0.01467 | 340.6561 | 521.5326 |
| YJL174W | 4054.643 | 4357.82  | 4251.609 | 4538.94  | 4317.531 | 3947.006 | 0.015794 | 3275.02  | 3158.17  |
| YOR342C | 2296.211 | 2368.273 | 2431.608 | 2222.46  | 2494.65  | 2312.041 | -0.01367 | 1768.488 | 1770.928 |
| YAL005C | 11226.56 | 9278.29  | 9842.034 | 8681.204 | 7706.338 | 7767.793 | -0.32921 | 15848.94 | 14102.45 |
| YGR040W | 582.6893 | 680.3222 | 641.2489 | 650.0829 | 662.5515 | 672.1846 | 0.059777 | 797.1127 | 925.4131 |
| YER107C | 784.2123 | 764.3737 | 714.3651 | 808.5742 | 744.3622 | 813.0792 | 0.064254 | 1197.356 | 1024.627 |
| YLR260W | 549.2941 | 558.6948 | 646.1892 | 601.7296 | 694.8149 | 763.1791 | 0.231656 | 894.9249 | 914.8771 |
| YER033C | 176.1887 | 98.88404 | 162.0413 | 104.7654 | 126.749  | 168.2908 | -0.12871 | 257.4595 | 410.9045 |
| YHR106W | 673.6626 | 725.8089 | 682.7473 | 692.1682 | 539.2593 | 551.8372 | -0.2236  | 1033.211 | 962.2892 |
| YNL334C | 166.9762 | 135.4711 | 141.2921 | 134.3147 | 168.2305 | 175.1398 | 0.106347 | 79.8237  | 65.85008 |
| YMR136W | 642.5704 | 676.3669 | 662.9861 | 479.951  | 439.0124 | 511.7214 | -0.4702  | 831.9653 | 866.5871 |
| YPL260W | 1687.035 | 1562.368 | 1608.557 | 1501.638 | 1516.379 | 1475.48  | -0.11251 | 1930.384 | 2171.297 |
| YBR130C | 1429.086 | 1370.533 | 1481.097 | 1307.329 | 1423.045 | 1534.186 | -0.00546 | 1870.798 | 1899.994 |
| YJL047C | 43.75928 | 45.48666 | 58.29535 | 43.87612 | 49.54733 | 36.20208 | -0.18677 | 10.1185  | 26.34003 |
| YJR112W | 880.9434 | 696.1437 | 705.4726 | 769.1753 | 825.0206 | 689.7965 | 0.000905 | 521.6648 | 472.3646 |
| YMR053C | 102.4888 | 105.8059 | 82.00872 | 95.81112 | 71.44034 | 80.23165 | -0.23023 | 163.0202 | 168.5762 |
| YGR062C | 567.719  | 664.5008 | 582.9535 | 619.6383 | 615.3087 | 558.6862 | -0.01722 | 408.1127 | 402.1245 |
| YLR247C | 512.4442 | 523.0966 | 549.3596 | 499.6505 | 578.4363 | 609.5648 | 0.090625 | 717.289  | 818.297  |
| YOL156W | 26.48588 | 33.62057 | 19.76114 | 12.53603 | 9.218108 | 1.956869 | -1.75205 | 61.83526 | 72.87409 |
| YDL098C | 344.3164 | 334.2281 | 327.0468 | 311.61   | 368.7243 | 305.2716 | -0.02896 | 201.2457 | 179.1122 |
| YEL019C | 160.0668 | 217.5449 | 228.2411 | 203.2628 | 185.5144 | 214.2772 | -0.00668 | 70.82948 | 114.1401 |
| YLR108C | 666.7532 | 712.954  | 610.6191 | 589.1936 | 603.7861 | 544.0097 | -0.19642 | 816.2254 | 716.4489 |
| YJR116W | 1933.469 | 2102.275 | 1847.666 | 2140.08  | 2204.28  | 1862.94  | 0.077313 | 1149.012 | 1197.593 |
| YIL160C | 185.4012 | 240.2882 | 189.7069 | 229.2303 | 160.1646 | 156.5496 | -0.17276 | 98.93642 | 84.2881  |
| YDR272W | 1620.245 | 1698.828 | 1764.669 | 1557.155 | 1388.477 | 1417.752 | -0.22044 | 1186.113 | 1074.673 |
| YIL053W | 25173.1  | 24811    | 24697.47 | 23810.41 | 22682.31 | 20860.23 | -0.14901 | 34321.94 | 29809.89 |
| YKR005C | 110.5498 | 117.672  | 105.7221 | 141.4781 | 132.5103 | 166.3339 | 0.398954 | 76.45087 | 81.6541  |
| YGL096W | 97.88259 | 101.8506 | 104.734  | 79.69336 | 76.04939 | 97.84347 | -0.26381 | 137.1619 | 134.3342 |
| YAL049C | 2293.907 | 2211.047 | 1966.233 | 1909.059 | 1921.975 | 1843.371 | -0.18956 | 3150.225 | 2827.163 |
| YIL119C | 193.4621 | 202.7123 | 159.0771 | 191.6222 | 206.2552 | 265.1558 | 0.25594  | 462.078  | 346.8104 |
| YDR381W | 8557.242 | 8002.686 | 8624.748 | 8557.634 | 8406.914 | 8606.312 | 0.021955 | 11234.9  | 10728.3  |
| YLR309C | 833.7294 | 723.8312 | 956.439  | 896.3265 | 955.2264 | 1239.677 | 0.298196 | 1437.951 | 1619.912 |
| YGR085C | 25953.86 | 20244.53 | 23223.29 | 26201.21 | 25978.93 | 23524.51 | 0.124996 | 20170.66 | 17690.84 |
| YBR223C | 99.03415 | 145.3595 | 128.4474 | 121.7786 | 96.79013 | 107.6278 | -0.19282 | 207.9913 | 194.9162 |

|           |          |          |          |          |          |          |          |          |          |
|-----------|----------|----------|----------|----------|----------|----------|----------|----------|----------|
| YKR052C   | 559.6581 | 772.2844 | 639.2728 | 610.684  | 547.3251 | 510.7429 | -0.24032 | 349.6503 | 374.0285 |
| YER158C   | 588.4471 | 741.6303 | 645.2011 | 641.1286 | 621.07   | 722.0848 | 0.006562 | 364.2659 | 400.3685 |
| YHR076W   | 1649.034 | 1512.926 | 1526.548 | 1584.913 | 1479.506 | 1422.644 | -0.06336 | 1122.029 | 1096.623 |
| YJL203W   | 188.8558 | 249.1878 | 233.1814 | 186.2497 | 167.0782 | 202.536  | -0.27206 | 309.1763 | 307.3004 |
| YGL077C   | 3199.034 | 4477.469 | 3457.211 | 4030.335 | 3756.379 | 3322.764 | -0.00314 | 2100.15  | 2245.927 |
| YDR044W   | 7448.29  | 6783.445 | 7618.906 | 6695.138 | 6234.898 | 5909.746 | -0.21389 | 4110.358 | 4048.463 |
| YBL095W   | 251.0401 | 330.2727 | 240.0978 | 264.1522 | 300.7408 | 188.8379 | -0.12405 | 114.6763 | 103.6041 |
| YNL024C-1 | 1119.316 | 990.8181 | 1075.006 | 1088.844 | 1141.893 | 987.2406 | 0.014798 | 825.2197 | 689.2308 |
| YML111W   | 609.1752 | 685.2664 | 772.6604 | 726.1946 | 773.1688 | 971.5857 | 0.257456 | 1023.093 | 1200.227 |
| YER154W   | 2538.038 | 2917.079 | 2600.566 | 2539.442 | 2604.115 | 2044.929 | -0.16432 | 1622.332 | 1877.166 |
| YLR455W   | 735.8468 | 744.5968 | 720.2934 | 711.8677 | 732.8396 | 676.0984 | -0.05337 | 534.0318 | 539.9707 |
| YOR261C   | 2434.398 | 2335.641 | 2590.685 | 2406.919 | 2442.799 | 2700.48  | 0.036667 | 3088.39  | 3279.334 |
| YNL006W   | 673.6626 | 652.6347 | 730.174  | 667.9915 | 636.0494 | 641.8532 | -0.07974 | 1092.798 | 923.6571 |
| YPL183W-1 | 1163.076 | 1063.003 | 910.0003 | 1065.563 | 1004.774 | 848.3029 | -0.10367 | 845.4567 | 725.2289 |
| YLL043W   | 1688.187 | 1854.076 | 1798.263 | 1790.862 | 1786.008 | 1908.926 | 0.038719 | 2359.858 | 2402.211 |
| YMR221C   | 1383.023 | 1525.781 | 1451.455 | 1513.278 | 1569.383 | 1311.103 | 0.011043 | 1047.827 | 1046.577 |
| YAL067C   | 127.8232 | 224.4668 | 151.1727 | 157.5959 | 130.2058 | 148.7221 | -0.20582 | 87.69364 | 82.5321  |
| YIRO20C   | 19.57652 | 38.56478 | 33.59393 | 34.92181 | 14.97943 | 25.4393  | -0.28405 | 77.57515 | 103.6041 |
| YPR139C   | 1658.246 | 1695.861 | 1682.661 | 1769.372 | 1701.893 | 1783.686 | 0.061179 | 1365.997 | 1311.734 |
| YJR005C-1 | 47.21396 | 39.55362 | 54.34313 | 17.01319 | 16.13169 | 20.54713 | -1.39405 | 83.19653 | 105.3601 |
| YDR435C   | 348.9227 | 430.1456 | 423.8764 | 361.7541 | 368.7243 | 407.0288 | -0.08069 | 742.0231 | 610.2107 |
| YKR075C   | 78.30608 | 90.97332 | 62.24758 | 77.00707 | 114.0741 | 69.46886 | 0.17038  | 159.6474 | 155.4062 |
| YLR449W   | 3948.699 | 3658.71  | 3968.036 | 4369.703 | 4235.721 | 4509.606 | 0.180153 | 5754.052 | 5639.401 |
| YKL085W   | 3960.215 | 3425.343 | 3886.027 | 3562.92  | 3358.848 | 3305.152 | -0.14032 | 5781.035 | 5451.509 |
| YJL167W   | 16091.9  | 15541.61 | 15539.17 | 16476.83 | 17070.78 | 16357.47 | 0.081235 | 12539.07 | 11840.72 |
| YGR189C   | 5566.641 | 5725.386 | 5548.927 | 6003.865 | 5889.219 | 5399.981 | 0.03822  | 6841.228 | 6772.9   |
| YEL011W   | 2721.136 | 2766.776 | 2718.144 | 1782.803 | 1625.844 | 1745.528 | -0.67095 | 2944.483 | 2863.162 |
| YHR072W   | 4559.026 | 6108.067 | 5213.976 | 5633.157 | 5716.379 | 5616.215 | 0.095317 | 3617.925 | 3813.159 |
| YPR157W   | 92.1248  | 127.5604 | 90.90123 | 126.2558 | 130.2058 | 88.05912 | 0.149596 | 269.8266 | 238.8163 |
| YPL093W   | 8334.991 | 8809.579 | 9059.493 | 10834.72 | 11088.23 | 11803.84 | 0.364104 | 7555.145 | 7762.407 |
| YJL130C   | 10844.24 | 11038.43 | 11544.46 | 10481.92 | 10520.17 | 12463.3  | 0.00165  | 13103.45 | 13930.37 |
| YLR439W   | 1722.734 | 1936.15  | 1664.876 | 1827.575 | 1772.181 | 1654.533 | -0.01895 | 1331.145 | 1428.508 |
| YKL211C   | 2105.052 | 1995.48  | 1992.911 | 2090.831 | 2067.161 | 2046.885 | 0.026145 | 2540.867 | 2418.893 |
| YOL128C   | 572.3253 | 632.8579 | 487.112  | 528.3043 | 604.9383 | 546.945  | -0.01036 | 355.2717 | 335.3964 |
| YOR131C   | 806.092  | 717.8982 | 808.2305 | 868.5681 | 769.712  | 660.4434 | -0.02087 | 1222.09  | 1129.987 |
| YGL125W   | 821.0622 | 1129.256 | 1048.328 | 873.9407 | 859.5885 | 962.7798 | -0.15333 | 557.6416 | 539.0927 |
| YML124C   | 3802.451 | 3723.973 | 3775.365 | 3879.007 | 3850.865 | 3753.276 | 0.022967 | 4663.503 | 4466.391 |
| YGL035C   | 2118.87  | 1925.272 | 2293.28  | 1922.49  | 1819.424 | 1987.201 | -0.14558 | 2287.905 | 2814.871 |
| YJL189W   | 12.66716 | 18.78797 | 7.904455 | 15.22233 | 14.97943 | 5.870608 | -0.12582 | 46.09538 | 35.99804 |
| YDR156W   | 3004.42  | 3071.338 | 2775.452 | 3268.323 | 3161.811 | 2588.938 | 0.027104 | 2486.902 | 2165.151 |
| YOL109W   | 33612.88 | 28000.01 | 32446.8  | 37095.92 | 34542.55 | 29636.79 | 0.106633 | 46709.23 | 44509.39 |
| YLR452C   | 1167.682 | 1084.758 | 1067.101 | 1118.393 | 1242.14  | 1471.566 | 0.207151 | 1615.587 | 1721.76  |
| YGR048W   | 807.2435 | 745.5857 | 717.3293 | 668.887  | 652.1811 | 579.2334 | -0.25656 | 1110.786 | 906.0971 |
| YJL133C-1 | 739.3015 | 804.9161 | 659.0339 | 488.0099 | 413.6626 | 344.409  | -0.82224 | 478.9422 | 364.3704 |
| YKL060C   | 275495.7 | 223791.4 | 264985   | 276603.1 | 260110.8 | 264426.9 | 0.067969 | 401364.8 | 354953   |
| YIRO25W   | 231.4635 | 274.8976 | 229.2292 | 194.3085 | 222.3868 | 226.0184 | -0.19473 | 382.2543 | 305.5444 |
| YGR094W   | 8853.193 | 8156.945 | 9078.266 | 9461.124 | 9662.881 | 11528.9  | 0.232615 | 12835.88 | 13272.74 |
| YGR263C   | 427.2287 | 393.5585 | 391.2705 | 405.6303 | 346.8313 | 338.5384 | -0.15181 | 218.1098 | 235.3043 |
| YGL057C   | 370.8023 | 346.0942 | 347.796  | 376.9765 | 334.1564 | 365.9346 | 0.016672 | 194.5    | 258.1323 |
| YLL061W   | 2330.757 | 3542.026 | 2505.712 | 3104.459 | 2773.498 | 2294.429 | -0.03593 | 1421.087 | 1377.584 |
| YEL069C   | 78.30608 | 64.27463 | 93.8654  | 46.56241 | 41.48148 | 50.87861 | -0.76723 | 30.35549 | 21.95003 |
| YBR158W   | 914.3386 | 994.7735 | 976.2001 | 932.1437 | 1027.819 | 1047.904 | 0.060013 | 1270.434 | 1370.56  |
| YHL004W   | 2350.334 | 2588.784 | 2075.907 | 2000.393 | 2070.617 | 1827.716 | -0.25004 | 1685.292 | 1555.818 |
| YPR004C   | 1757.28  | 2073.598 | 2019.588 | 1989.648 | 2011.852 | 1724.98  | -0.0309  | 1493.04  | 1424.118 |

|           |          |          |          |          |          |          |          |          |          |
|-----------|----------|----------|----------|----------|----------|----------|----------|----------|----------|
| YOR125C   | 633.358  | 646.7016 | 728.1979 | 623.22   | 591.1112 | 554.7725 | -0.18293 | 939.896  | 863.0751 |
| YMR293C   | 350.0742 | 354.0049 | 369.5333 | 374.2902 | 357.2017 | 309.1854 | -0.04495 | 267.578  | 217.7443 |
| YMR276W   | 4643.09  | 4598.108 | 4574.703 | 4975.015 | 4567.572 | 4224.881 | -0.00507 | 5904.705 | 5797.441 |
| YMR105C   | 1632.912 | 1550.502 | 1569.034 | 857.8229 | 897.6132 | 924.6208 | -0.82641 | 2463.292 | 2138.811 |
| YPL196W   | 393.8335 | 357.9602 | 325.0707 | 286.5379 | 299.5885 | 247.544  | -0.36929 | 544.1503 | 435.4885 |
| YMR267W   | 1016.827 | 1195.508 | 1113.54  | 1106.753 | 1139.589 | 1071.386 | -0.00354 | 905.0434 | 847.271  |
| YGR070W   | 294.7993 | 209.6342 | 243.062  | 137.8964 | 172.8395 | 205.4713 | -0.53411 | 381.1301 | 338.0304 |
| YML057W   | 2076.263 | 1893.629 | 1846.678 | 1773.849 | 1771.029 | 1635.943 | -0.16699 | 1267.061 | 1304.71  |
| YGL029W   | 2377.971 | 2092.386 | 2049.23  | 2535.861 | 2541.893 | 2138.858 | 0.146541 | 1831.448 | 1841.168 |
| YDR246W   | 844.0934 | 726.7977 | 922.8451 | 747.6849 | 788.1482 | 741.6535 | -0.13087 | 1064.691 | 1233.592 |
| YBL002W   | 13104.75 | 10971.18 | 12171.87 | 12816.3  | 13035.56 | 12085.63 | 0.06573  | 9949.856 | 8636.897 |
| YOR045W   | 2512.704 | 2033.056 | 2014.648 | 2199.179 | 2167.408 | 1951.977 | -0.05419 | 1779.731 | 1835.9   |
| YMR127C   | 199.2199 | 247.2101 | 239.1098 | 239.9755 | 214.321  | 236.7812 | 0.011608 | 338.4075 | 415.2945 |
| YEL075C   | 3.45468  | 7.910723 | 6.916398 | 8.95431  | 8.065844 | 12.71965 | 0.701987 | 0        | 0        |
| YMR263W   | 571.1737 | 523.0966 | 413.0078 | 492.4871 | 546.1729 | 472.584  | 0.003791 | 806.107  | 727.8629 |
| YGR117C   | 464.0787 | 432.1233 | 465.3748 | 462.9378 | 462.0577 | 549.8803 | 0.115315 | 707.1705 | 652.3548 |
| YPR013C   | 941.976  | 850.4028 | 948.5346 | 832.7509 | 954.0742 | 846.346  | -0.05786 | 1188.361 | 1111.549 |
| YMR039C   | 2563.372 | 2070.632 | 2550.175 | 2445.422 | 2294.157 | 2387.381 | -0.01154 | 3418.928 | 3273.188 |
| YOL052C-1 | 2215.601 | 2388.05  | 2100.609 | 1198.087 | 1096.955 | 959.8445 | -1.04247 | 1307.535 | 1154.571 |
| YJR063W   | 2361.849 | 2071.621 | 2091.716 | 2458.854 | 2484.28  | 2164.298 | 0.123309 | 1837.069 | 1694.542 |
| YBL033C   | 906.2777 | 1122.334 | 975.2121 | 1114.812 | 949.4651 | 809.1655 | -0.06402 | 1277.179 | 1338.952 |
| YLR121C   | 534.3238 | 539.9069 | 540.4671 | 593.6708 | 636.0494 | 576.298  | 0.161548 | 753.2659 | 734.8869 |
| YDR185C   | 442.199  | 434.101  | 379.4138 | 355.4861 | 336.4609 | 264.1774 | -0.39324 | 220.3584 | 213.3543 |
| YBR235W   | 870.5793 | 903.8002 | 933.7137 | 909.7579 | 851.5227 | 814.0577 | -0.07252 | 706.0463 | 676.9388 |
| YJR059W   | 1421.025 | 1264.727 | 1391.184 | 1351.205 | 1325.103 | 1479.393 | 0.027607 | 1716.772 | 2096.667 |
| YDR244W   | 488.2614 | 500.3533 | 645.2011 | 541.7358 | 542.7161 | 607.608  | 0.050535 | 788.1185 | 723.4729 |
| YHL050C   | 74.8514  | 119.6497 | 143.2682 | 94.91569 | 107.1605 | 186.881  | 0.203573 | 34.8526  | 41.26605 |
| YOL133W   | 779.6061 | 588.3601 | 694.6039 | 619.6383 | 591.1112 | 604.6727 | -0.18414 | 464.3266 | 387.1985 |
| YBR271W   | 1029.495 | 1095.635 | 1011.77  | 1112.125 | 1228.313 | 1270.008 | 0.202838 | 810.6041 | 784.933  |
| YOR064C   | 839.4872 | 879.0791 | 848.7408 | 856.0321 | 754.7326 | 551.8372 | -0.24749 | 520.5405 | 445.1465 |
| YCL026C-1 | 17.2734  | 13.84377 | 26.67753 | 7.163448 | 16.13169 | 13.69809 | -0.64368 | 76.45087 | 63.21608 |
| YFL051C   | 33.39524 | 33.62057 | 57.3073  | 24.17664 | 33.41564 | 54.79234 | -0.14565 | 74.20231 | 93.94611 |
| YBL102W   | 770.3936 | 756.4629 | 777.6007 | 770.9661 | 695.9671 | 734.8045 | -0.06578 | 1061.318 | 1122.963 |
| YHR136C   | 118.6107 | 142.393  | 156.113  | 69.84362 | 55.30865 | 66.53356 | -1.12171 | 77.57515 | 29.85204 |
| YLL040C   | 2185.661 | 2139.851 | 2181.629 | 2013.824 | 2006.091 | 2027.317 | -0.10575 | 1648.191 | 1599.718 |
| YKL168C   | 255.6463 | 333.2392 | 298.3932 | 214.008  | 290.3704 | 349.3012 | -0.05569 | 483.4393 | 496.9486 |
| YHR215W   | 38.00148 | 48.45318 | 38.53422 | 49.24871 | 17.28395 | 26.41774 | -0.42727 | 157.3988 | 79.0201  |
| YGL116W   | 614.933  | 635.8244 | 588.8819 | 708.2859 | 705.1852 | 699.5808 | 0.199905 | 834.2139 | 924.5351 |
| YDR482C   | 1389.933 | 1224.184 | 1271.629 | 1315.388 | 1129.218 | 1023.443 | -0.16407 | 863.4451 | 823.565  |
| YNL144C   | 82.91232 | 91.96216 | 96.82957 | 68.94819 | 63.37449 | 61.64139 | -0.48625 | 106.8064 | 165.0642 |
| YOL049W   | 1829.829 | 1795.734 | 1912.878 | 1813.248 | 1910.453 | 2084.066 | 0.068504 | 2403.705 | 2419.771 |
| YBR302C   | 0        | 1.977681 | 5.928341 | 4.477155 | 2.304527 | 7.827478 | 0.885849 | 16.86416 | 28.09603 |
| YDR005C   | 663.2985 | 588.3601 | 762.7799 | 616.0565 | 715.5556 | 688.818  | 0.004285 | 1002.856 | 946.4852 |
| YPL103C   | 584.9924 | 752.5076 | 627.4161 | 690.3773 | 648.7243 | 640.8747 | 0.011016 | 474.4451 | 446.0245 |
| YLR466W   | 0        | 0        | 0.988057 | 0        | 0        | 0        | #NUM!    | 5.621387 | 8.780011 |
| YMR210W   | 902.823  | 921.5993 | 888.2631 | 854.2412 | 754.7326 | 808.1871 | -0.16641 | 636.3411 | 590.8947 |
| YPL056C   | 149.7028 | 153.2703 | 134.3757 | 116.406  | 122.1399 | 139.9162 | -0.20864 | 275.448  | 222.1343 |
| YJL037W   | 20.72808 | 7.910723 | 0        | 3.581724 | 6.913581 | 3.913739 | -0.991   | 69.7052  | 64.09408 |
| YLR410W   | 1464.784 | 1476.339 | 1579.903 | 1520.442 | 1487.572 | 1755.312 | 0.075319 | 1929.26  | 2151.981 |
| YDR121W   | 698.9969 | 582.427  | 528.6104 | 674.2596 | 638.354  | 582.1687 | 0.066015 | 1122.029 | 950.8752 |
| YJL101C   | 1110.104 | 1315.158 | 1167.883 | 1228.531 | 1237.531 | 1255.332 | 0.050596 | 1317.653 | 1436.41  |
| YGL225W   | 5864.895 | 6561.945 | 6094.335 | 6604.699 | 6951.606 | 5698.404 | 0.056036 | 4838.89  | 4270.597 |
| YBR234C   | 3838.149 | 3448.087 | 3580.718 | 3568.293 | 3597.367 | 3354.074 | -0.04685 | 5318.957 | 4790.374 |
| YAL009W   | 571.1737 | 543.8622 | 533.5507 | 565.9124 | 513.9095 | 522.4841 | -0.04108 | 391.2486 | 347.6884 |



|           |          |          |          |          |          |          |          |          |          |
|-----------|----------|----------|----------|----------|----------|----------|----------|----------|----------|
| YHR146W   | 2399.851 | 1940.105 | 2570.924 | 2226.042 | 2182.387 | 2249.421 | -0.05381 | 2749.983 | 3037.884 |
| YNL317W   | 507.8379 | 456.8443 | 496.9926 | 396.6759 | 472.428  | 418.7701 | -0.18263 | 676.815  | 636.5508 |
| YBR240C   | 161.2184 | 219.5226 | 132.3996 | 100.2883 | 109.465  | 107.6278 | -0.69314 | 24.7341  | 56.19207 |
| YPL150W   | 566.5675 | 585.3935 | 649.1533 | 539.0495 | 550.7819 | 648.7022 | -0.05102 | 748.7688 | 818.297  |
| YCL073C   | 4.60624  | 7.910723 | 5.928341 | 8.95431  | 13.82716 | 1.956869 | 0.423495 | 0        | 0        |
| YOL140W   | 1361.144 | 1408.109 | 1174.8   | 1244.649 | 1151.111 | 998.9818 | -0.21638 | 959.0087 | 809.517  |
| YOR185C   | 1492.422 | 1503.037 | 1402.053 | 1246.44  | 1207.572 | 1039.098 | -0.33218 | 1278.303 | 918.3891 |
| YDR092W   | 1454.42  | 1167.821 | 1357.59  | 1386.127 | 1322.798 | 1212.281 | -0.02141 | 2033.818 | 1737.564 |
| YLL042C   | 57.578   | 77.12955 | 69.16398 | 71.63448 | 77.20165 | 60.66295 | 0.039284 | 41.59827 | 24.58403 |
| YDL212W   | 4086.886 | 3661.676 | 3853.422 | 4110.028 | 4190.782 | 3733.707 | 0.052807 | 3442.538 | 2924.622 |
| YGR167W   | 3742.57  | 3574.658 | 3770.425 | 3639.927 | 3454.486 | 3378.535 | -0.08229 | 4986.171 | 4529.608 |
| YOL123W   | 3759.843 | 2899.28  | 3693.356 | 3836.027 | 3915.391 | 4203.356 | 0.20761  | 4789.422 | 5377.757 |
| YBR035C   | 2791.381 | 2275.322 | 2341.695 | 2386.324 | 2367.901 | 2430.432 | -0.04424 | 3699.997 | 3222.264 |
| YGR161C   | 1073.254 | 1598.955 | 921.857  | 590.9845 | 315.7202 | 240.6949 | -1.64725 | 1551.503 | 1417.972 |
| YKRO29C   | 434.1381 | 454.8666 | 514.7776 | 453.0881 | 546.1729 | 582.1687 | 0.17191  | 600.3642 | 720.8389 |
| YGL103W   | 1055.98  | 1324.057 | 1132.313 | 1104.066 | 1102.716 | 1048.882 | -0.10948 | 896.0492 | 784.055  |
| YDL005C   | 1220.654 | 1095.635 | 1176.776 | 1103.171 | 1216.79  | 1193.69  | 0.008478 | 1439.075 | 1676.982 |
| YHR181W   | 917.7933 | 943.3538 | 879.3706 | 1030.641 | 1063.539 | 900.1599 | 0.12779  | 799.3613 | 647.0868 |
| YGL193C   | 133.581  | 167.114  | 143.2682 | 101.1837 | 134.8148 | 103.7141 | -0.38613 | 55.0896  | 64.97208 |
| YKL073W   | 1406.055 | 1295.381 | 1428.73  | 1358.369 | 1540.576 | 1749.441 | 0.17053  | 1819.081 | 2035.206 |
| YOR005C   | 604.569  | 617.0364 | 652.1175 | 595.4616 | 667.1605 | 546.945  | -0.05026 | 391.2486 | 460.9506 |
| YER026C   | 2620.95  | 3003.108 | 2428.644 | 2469.599 | 2282.634 | 2206.37  | -0.21068 | 1920.266 | 1529.478 |
| YPR186C   | 709.3609 | 677.3557 | 650.1414 | 811.2605 | 868.8067 | 833.6264 | 0.303463 | 609.3584 | 528.5566 |
| YGR187C   | 2262.815 | 2217.969 | 2145.071 | 2526.011 | 2647.901 | 2607.529 | 0.231931 | 1930.384 | 1892.97  |
| YCR097W-1 | 9.21248  | 10.87724 | 20.74919 | 3.581724 | 19.58848 | 1.956869 | -0.7007  | 0        | 0        |
| YPL218W   | 5643.795 | 5121.205 | 4860.252 | 5158.578 | 5362.634 | 4784.546 | -0.0298  | 4457.76  | 3722.725 |
| YKRO19C   | 264.8588 | 287.7526 | 236.1456 | 307.1328 | 278.8478 | 312.1207 | 0.187297 | 366.5145 | 372.2725 |
| YOR313C   | 193.4621 | 224.4668 | 196.6233 | 183.5634 | 197.0371 | 244.6087 | 0.024803 | 50.59249 | 67.60608 |
| YGL148W   | 7078.639 | 6495.693 | 6788.938 | 7524.307 | 7134.815 | 7153.336 | 0.099183 | 8866.052 | 8772.987 |
| YJL180C   | 742.7562 | 839.5255 | 817.123  | 741.4169 | 745.5145 | 640.8747 | -0.17331 | 540.7775 | 582.9927 |
| YNL015W   | 3863.484 | 3865.377 | 3936.418 | 4052.721 | 4100.906 | 3552.696 | 0.005067 | 3431.295 | 3241.58  |
| YML042W   | 321.2852 | 331.2615 | 277.644  | 205.0537 | 236.214  | 175.1398 | -0.59364 | 415.9827 | 423.1965 |
| YPL135W   | 2457.429 | 3008.053 | 2402.954 | 1914.432 | 1707.654 | 1506.789 | -0.61743 | 1680.795 | 1642.74  |
| YDR169C   | 619.5392 | 566.6056 | 670.8906 | 545.3175 | 556.5433 | 717.1926 | -0.02981 | 793.7399 | 944.7292 |
| YBR173C   | 2825.928 | 2488.911 | 2658.861 | 2572.573 | 2495.803 | 2390.316 | -0.09633 | 3692.127 | 3422.448 |
| YIL165C   | 84.06388 | 126.5716 | 99.79374 | 108.3472 | 70.28807 | 77.29634 | -0.27851 | 49.46821 | 47.41206 |
| YOR192C-1 | 1.15156  | 1.977681 | 0        | 0        | 3.45679  | 0.978435 | 0.503195 | 13.49133 | 15.80402 |
| YIL108W   | 794.5764 | 922.5881 | 836.8841 | 749.4758 | 780.0824 | 749.481  | -0.16436 | 924.1561 | 958.7772 |
| YOR234C   | 9181.387 | 8507.983 | 8411.328 | 9186.227 | 9768.89  | 8483.029 | 0.072095 | 7754.142 | 6872.992 |
| YKL098W   | 929.3089 | 1082.78  | 907.0362 | 842.6006 | 758.1894 | 728.9339 | -0.32538 | 657.7023 | 561.9207 |
| YNR066C   | 127.8232 | 169.0917 | 204.5278 | 135.2101 | 208.5597 | 183.9457 | 0.073676 | 62.95954 | 81.6541  |
| YDR478W   | 704.7547 | 666.4785 | 634.3325 | 690.3773 | 685.5968 | 586.0824 | -0.03164 | 473.3208 | 440.7565 |
| YDL182W   | 3263.521 | 3065.405 | 2984.92  | 3011.335 | 2976.297 | 2791.474 | -0.0853  | 4031.659 | 3910.617 |
| YML060W   | 619.5392 | 740.6415 | 692.6278 | 722.6128 | 721.3169 | 656.5297 | 0.033106 | 431.7226 | 365.2484 |
| YPL123C   | 517.0504 | 496.3979 | 417.948  | 359.0678 | 316.8725 | 375.7189 | -0.44476 | 636.3411 | 656.7448 |
| YJL031C   | 368.4992 | 306.5405 | 395.2227 | 468.3104 | 345.679  | 403.1151 | 0.185489 | 583.5    | 528.5566 |
| YOL124C   | 1464.784 | 1475.35  | 1647.091 | 1783.699 | 1731.852 | 1728.894 | 0.193168 | 1244.575 | 1319.636 |
| YMR225C   | 1106.649 | 974.0078 | 941.6182 | 896.3265 | 879.177  | 787.6399 | -0.23772 | 790.3671 | 703.2789 |
| YHL036W   | 397.2882 | 550.7841 | 348.7841 | 324.146  | 281.1523 | 226.9969 | -0.63985 | 453.0838 | 543.4827 |
| YBR225W   | 179.6434 | 212.6007 | 270.7276 | 193.4131 | 233.9095 | 251.4577 | 0.033998 | 301.3064 | 382.8085 |
| YKRO42W   | 34478.86 | 45927.68 | 34706.48 | 39749.08 | 39412.02 | 31459.61 | -0.05743 | 26248.51 | 26199.55 |
| YML117W   | 969.6135 | 965.1083 | 1189.62  | 981.3924 | 1066.996 | 1290.555 | 0.095839 | 1352.506 | 1638.35  |
| YPR015C   | 47.21396 | 54.38622 | 69.16398 | 64.47103 | 50.69959 | 64.57669 | 0.073965 | 92.19075 | 77.26409 |
| YFLO31W   | 9986.328 | 11639.64 | 9607.865 | 8962.369 | 8931.194 | 7584.826 | -0.29384 | 8050.951 | 6851.042 |

|                   |          |          |          |          |          |          |          |          |          |
|-------------------|----------|----------|----------|----------|----------|----------|----------|----------|----------|
| YOR113W           | 313.2243 | 297.641  | 363.6049 | 343.8455 | 345.679  | 471.6055 | 0.25284  | 464.3266 | 598.7967 |
| YIL113W           | 138.1872 | 161.181  | 191.683  | 109.2426 | 125.5967 | 97.84347 | -0.56173 | 247.341  | 194.9162 |
| YGL135W           | 52345.31 | 44639.22 | 48337.72 | 53188.6  | 49874.57 | 47868.94 | 0.054644 | 45480.4  | 37203.54 |
| YOL052C           | 1573.031 | 1672.129 | 1561.13  | 1659.234 | 1605.103 | 1558.647 | 0.005002 | 1969.734 | 2135.299 |
| YNL110C           | 5415.786 | 5002.544 | 4898.786 | 5777.321 | 5485.926 | 5264.957 | 0.109785 | 4696.107 | 4466.391 |
| YKR087C           | 694.3906 | 808.8715 | 714.3651 | 677.8413 | 732.8396 | 534.2254 | -0.18932 | 460.9538 | 500.4606 |
| YNL070W           | 1294.353 | 1162.876 | 998.9255 | 1087.053 | 1118.848 | 1089.976 | -0.06851 | 893.8006 | 812.151  |
| YGR205W           | 163.5215 | 166.1252 | 227.2531 | 120.8832 | 165.9259 | 127.1965 | -0.42777 | 333.9104 | 286.2284 |
| YGL026C           | 3393.647 | 3496.54  | 3592.575 | 3746.483 | 3470.618 | 3638.799 | 0.05046  | 4174.442 | 4196.845 |
| YLR390W- <i>f</i> | 16610.1  | 16933.89 | 15563.87 | 16125.82 | 16581.07 | 13600.24 | -0.08472 | 13160.79 | 12226.16 |
| YDR279W           | 346.6195 | 346.0942 | 385.3422 | 417.2709 | 414.8148 | 399.2014 | 0.191735 | 601.4885 | 513.6306 |
| YLL015W           | 1840.193 | 1860.998 | 1633.258 | 1578.645 | 1424.198 | 1779.773 | -0.15754 | 1216.468 | 1231.836 |
| YLR397C           | 1541.939 | 1762.114 | 1482.085 | 1634.162 | 1654.65  | 1586.043 | 0.026497 | 1210.847 | 1142.279 |
| YGR150C           | 936.2182 | 1046.193 | 1006.83  | 936.6209 | 1002.469 | 1134.006 | 0.039913 | 710.5434 | 700.6449 |
| YLR113W           | 3504.197 | 3749.683 | 3597.515 | 3506.508 | 3283.951 | 3303.196 | -0.10443 | 4584.804 | 4301.327 |
| YBR071W           | 625.297  | 681.3111 | 727.2098 | 653.6646 | 663.7038 | 676.0984 | -0.02891 | 821.8468 | 783.177  |
| YOL070C           | 1260.958 | 1242.972 | 1150.098 | 1250.022 | 1372.346 | 1280.771 | 0.095147 | 1309.783 | 1548.794 |
| YHR047C           | 2498.885 | 2315.864 | 2395.05  | 2368.415 | 2359.836 | 2689.717 | 0.041065 | 3407.685 | 3227.532 |
| YER042W           | 1472.845 | 1456.562 | 1410.945 | 1447.017 | 1535.967 | 1277.836 | -0.02668 | 1074.809 | 923.6571 |
| YNR001W- <i>f</i> | 2.30312  | 0        | 0        | 2.686293 | 3.45679  | 2.935304 | 1.978847 | 20.23699 | 7.90201  |
| YOR230W           | 8856.647 | 8961.861 | 8952.783 | 8817.309 | 9295.309 | 9015.297 | 0.019092 | 11670    | 10773.95 |
| YPR145C- <i>f</i> | 51.8202  | 71.19651 | 41.49839 | 48.35328 | 42.63375 | 32.28835 | -0.41634 | 19.11272 | 28.09603 |
| YBL103C           | 352.3773 | 465.7438 | 514.7776 | 419.9572 | 445.926  | 462.7996 | -0.00457 | 583.5    | 679.5728 |
| YOR205C           | 994.9478 | 973.019  | 998.9255 | 993.033  | 966.749  | 907.9874 | -0.04902 | 700.4249 | 740.1549 |
| YLR220W           | 1501.634 | 1597.966 | 1393.16  | 1237.486 | 1186.831 | 1100.739 | -0.34996 | 1043.33  | 816.541  |
| YFL007W           | 1678.974 | 1655.319 | 1810.12  | 1718.332 | 1696.132 | 1941.214 | 0.058063 | 2407.078 | 2262.609 |
| YKR071C           | 3228.974 | 3346.236 | 3165.734 | 3658.731 | 3790.947 | 4012.561 | 0.234755 | 2477.908 | 2611.175 |
| YER064C           | 1634.064 | 1664.218 | 1715.267 | 1484.625 | 1455.309 | 1420.687 | -0.2013  | 1870.798 | 1974.624 |
| YDR514C           | 810.6982 | 1030.372 | 959.4032 | 1082.576 | 1140.741 | 1112.48  | 0.252361 | 726.2833 | 683.0848 |
| YJL057C           | 294.7993 | 274.8976 | 290.4887 | 250.7207 | 247.7366 | 270.048  | -0.16259 | 378.8815 | 352.0784 |
| YJR005W           | 720.8765 | 661.5342 | 723.2576 | 681.423  | 700.5762 | 768.0713 | 0.030106 | 885.9307 | 971.9472 |
| YER018C           | 700.1484 | 805.905  | 740.0546 | 619.6383 | 758.1894 | 599.7805 | -0.18367 | 468.8237 | 457.4386 |
| YBR089C- <i>f</i> | 944.2792 | 708.0098 | 753.8874 | 745.894  | 743.2099 | 642.8316 | -0.17458 | 544.1503 | 563.6767 |
| YDR324C           | 2768.35  | 3004.097 | 3055.072 | 3545.011 | 3514.404 | 3915.696 | 0.314156 | 2355.361 | 2564.641 |
| YDL122W           | 2728.045 | 2967.51  | 2775.452 | 3259.369 | 3279.342 | 3606.51  | 0.260195 | 2321.633 | 2485.621 |
| YJR039W           | 207.2808 | 195.7904 | 223.3008 | 138.7918 | 203.9506 | 177.0967 | -0.26895 | 317.0462 | 286.2284 |
| YGR237C           | 669.0563 | 567.5944 | 612.5952 | 559.6444 | 516.214  | 585.104  | -0.15492 | 744.2717 | 865.7091 |
| YNL293W           | 309.7696 | 381.6924 | 397.1988 | 340.2638 | 361.8107 | 301.3579 | -0.11761 | 482.315  | 525.0446 |
| YDL154W           | 344.3164 | 395.5362 | 377.4377 | 358.1724 | 380.2469 | 297.4442 | -0.10917 | 231.6012 | 183.5022 |
| YBR146W           | 2819.019 | 2941.8   | 2870.305 | 2750.764 | 2761.976 | 2450.001 | -0.11628 | 2593.708 | 2378.505 |
| YGL192W           | 507.8379 | 832.6036 | 679.7831 | 561.4353 | 592.2634 | 548.9019 | -0.24678 | 350.7746 | 376.6625 |
| YJR105W           | 16342.94 | 17118.81 | 16102.36 | 17049.01 | 16431.28 | 15212.7  | -0.02558 | 13404.76 | 12443.91 |
| YJL066C           | 376.5601 | 378.7259 | 418.9361 | 308.0283 | 342.2223 | 296.4657 | -0.3107  | 535.1561 | 539.0927 |
| YKL161C           | 157.7637 | 213.5895 | 196.6233 | 179.0862 | 133.6626 | 183.9457 | -0.19347 | 276.5723 | 316.9584 |
| YPL186C           | 690.936  | 675.378  | 603.7027 | 570.3896 | 427.4897 | 435.4034 | -0.45888 | 441.841  | 417.0505 |
| YPL130W           | 40.3046  | 35.59826 | 39.52227 | 44.77155 | 34.5679  | 24.46087 | -0.15315 | 1.124277 | 10.53601 |
| YBR076C- <i>f</i> | 268.3135 | 240.2882 | 249.9784 | 241.7664 | 281.1523 | 243.6302 | 0.015076 | 179.8844 | 151.8942 |
| YDR186C           | 1085.921 | 1063.003 | 1220.25  | 1096.008 | 1122.305 | 1378.615 | 0.09437  | 1298.54  | 1684.884 |
| YIL031W           | 473.2911 | 331.2615 | 474.2673 | 452.1927 | 502.3869 | 641.8532 | 0.320039 | 689.1821 | 940.3392 |
| YPL161C           | 327.043  | 291.7079 | 331.9871 | 279.3745 | 267.3251 | 340.4953 | -0.0998  | 454.2081 | 475.8766 |
| YDR460W           | 1067.496 | 984.8851 | 809.2185 | 876.627  | 789.3005 | 750.4594 | -0.24397 | 593.6185 | 568.9447 |
| YNL079C           | 13939.63 | 10966.24 | 12398.14 | 14022.45 | 12939.92 | 12130.63 | 0.06758  | 17986.19 | 16329.06 |
| YOR163W           | 1335.81  | 1188.586 | 1365.495 | 1313.597 | 1298.601 | 1109.545 | -0.06375 | 1024.217 | 919.2671 |
| YKL010C           | 1229.866 | 1237.039 | 1233.095 | 1327.924 | 1213.333 | 1365.895 | 0.078592 | 1476.176 | 1631.326 |

|         |          |          |          |          |          |          |          |          |          |
|---------|----------|----------|----------|----------|----------|----------|----------|----------|----------|
| YLR435W | 1878.194 | 1736.404 | 1651.043 | 1852.647 | 1960     | 1660.404 | 0.055736 | 1604.344 | 1423.24  |
| YKL018C | 469.8365 | 436.0786 | 412.0197 | 422.6434 | 432.0988 | 387.4601 | -0.08538 | 301.3064 | 342.4204 |
| YDR088C | 367.3476 | 381.6924 | 355.7005 | 347.4272 | 364.1153 | 349.3012 | -0.0585  | 531.7832 | 505.7286 |
| YBR120C | 855.609  | 728.7754 | 724.2457 | 685.9002 | 699.4239 | 605.6511 | -0.21356 | 583.5    | 511.8746 |
| YLR055C | 879.7918 | 1172.765 | 891.2273 | 998.4056 | 1033.58  | 806.2302 | -0.05269 | 573.3815 | 609.3327 |
| YGR081C | 1646.731 | 1511.937 | 1500.858 | 1860.706 | 1813.663 | 1743.571 | 0.217561 | 1386.234 | 1345.976 |
| YER051W | 275.2228 | 285.7749 | 275.6679 | 217.5897 | 253.498  | 216.2341 | -0.28367 | 359.7688 | 354.7124 |
| YCR073W | 1254.049 | 1200.452 | 1083.898 | 1112.125 | 1123.457 | 936.362  | -0.15773 | 1585.231 | 1463.628 |
| YOR220W | 1168.833 | 1350.756 | 1092.791 | 971.5427 | 838.8478 | 701.5377 | -0.52415 | 1461.561 | 1402.168 |
| YDL225W | 1364.599 | 1237.039 | 1163.931 | 1368.219 | 1425.35  | 1399.162 | 0.155022 | 1672.925 | 1705.956 |
| YLR335W | 2909.992 | 2664.925 | 3193.4   | 3250.415 | 3351.934 | 4073.224 | 0.283942 | 4080.003 | 4366.299 |
| YJL155C | 377.7117 | 332.2504 | 296.417  | 277.5836 | 319.177  | 312.1207 | -0.14701 | 529.5347 | 425.8305 |
| YPR188C | 1248.291 | 927.5323 | 1054.257 | 1139.884 | 1019.753 | 918.7502 | -0.0694  | 831.9653 | 662.0128 |
| YLR117C | 665.6016 | 651.6458 | 560.2282 | 633.0697 | 583.0453 | 620.3276 | -0.03188 | 808.3555 | 874.4891 |
| YOR339C | 73.69984 | 74.16303 | 83.98483 | 58.20302 | 40.32922 | 48.92174 | -0.65291 | 17.98844 | 42.14405 |
| YGR037C | 9483.096 | 7963.132 | 8171.23  | 8987.441 | 8563.622 | 7973.264 | -0.00525 | 7021.113 | 6211.858 |
| YKL012W | 918.9448 | 939.3984 | 976.2001 | 964.3792 | 966.749  | 1083.127 | 0.088685 | 1260.315 | 1302.076 |
| YDL113C | 204.9777 | 231.3887 | 282.5843 | 216.6943 | 236.214  | 275.9186 | 0.019684 | 344.0289 | 418.8065 |
| YJL212C | 2893.87  | 3598.39  | 3336.668 | 3283.546 | 3157.202 | 3345.268 | -0.00631 | 2233.939 | 2302.997 |
| YKL088W | 688.6328 | 707.0209 | 639.2728 | 643.8149 | 708.642  | 799.3812 | 0.080593 | 912.9133 | 993.8972 |
| YDL205C | 1013.373 | 1145.077 | 952.4868 | 1079.89  | 947.1606 | 920.7071 | -0.07773 | 718.4133 | 724.3509 |
| YCR104W | 27.63744 | 16.81029 | 13.8328  | 16.11776 | 24.19753 | 22.504   | 0.108194 | 37.10116 | 32.48604 |
| YHR159W | 342.0133 | 258.0874 | 375.4616 | 299.9694 | 263.8683 | 373.7621 | -0.05726 | 485.6879 | 529.4346 |
| YBL084C | 360.4383 | 413.3353 | 358.6646 | 389.5125 | 377.9424 | 435.4034 | 0.087034 | 525.0376 | 591.7727 |
| YOR216C | 907.4292 | 741.6303 | 1001.89  | 836.3326 | 964.4445 | 1040.076 | 0.099815 | 1332.269 | 1312.612 |
| YFL044C | 519.3535 | 481.5653 | 496.9926 | 500.5459 | 488.5597 | 499.0017 | -0.00947 | 713.9162 | 661.1348 |
| YLR408C | 198.0683 | 214.5784 | 227.2531 | 137.8964 | 135.9671 | 119.369  | -0.70246 | 114.6763 | 110.6281 |
| YLR432W | 6046.841 | 5776.806 | 6124.964 | 6636.935 | 6741.894 | 6901.878 | 0.176236 | 5357.182 | 4951.926 |
| YJR046W | 884.398  | 1035.316 | 916.9167 | 958.1112 | 920.6585 | 836.5617 | -0.06305 | 1227.711 | 1253.786 |
| YGR078C | 3057.392 | 2996.187 | 2540.294 | 3170.721 | 2992.428 | 2511.642 | 0.013521 | 2060.801 | 2072.961 |
| YFL001W | 1211.441 | 1279.56  | 1116.504 | 1168.537 | 1050.864 | 1146.725 | -0.09991 | 885.9307 | 888.5371 |
| YBR096W | 1460.178 | 1223.196 | 1220.25  | 1211.518 | 1380.412 | 1188.798 | -0.04615 | 1043.33  | 869.2211 |
| YLL055W | 753.1202 | 1160.899 | 813.1708 | 745.894  | 557.6955 | 542.0528 | -0.56329 | 442.9653 | 422.3185 |
| YMR173W | 299.4056 | 386.6366 | 461.4225 | 416.3754 | 548.4774 | 765.1359 | 0.592313 | 179.8844 | 230.9143 |
| YGR029W | 791.1217 | 576.494  | 633.3444 | 684.1093 | 594.5679 | 589.9961 | -0.09868 | 1168.124 | 938.5831 |
| YJR103W | 1873.588 | 2146.773 | 1939.556 | 2157.093 | 1903.539 | 1776.837 | -0.02995 | 2404.83  | 2619.077 |
| YLR115W | 450.2599 | 574.5163 | 574.061  | 484.4282 | 526.5844 | 611.5217 | 0.021226 | 671.1937 | 842.003  |
| YHR108W | 3201.337 | 3312.615 | 3662.727 | 3802.896 | 4045.597 | 4463.619 | 0.274811 | 5070.491 | 4718.378 |
| YGR165W | 1822.919 | 1822.433 | 1857.547 | 1752.359 | 1795.226 | 1706.39  | -0.06678 | 1581.858 | 1556.696 |
| YLR095C | 1117.013 | 1109.479 | 1125.397 | 1002.883 | 1228.313 | 1195.647 | 0.031906 | 1423.335 | 1539.136 |
| YLR072W | 920.0964 | 760.4183 | 880.3586 | 854.2412 | 789.3005 | 820.9067 | -0.05537 | 641.9624 | 561.9207 |
| YMR107W | 145.0966 | 201.7234 | 169.9458 | 79.69336 | 76.04939 | 100.7788 | -1.01043 | 93.31503 | 61.46008 |
| YDR253C | 686.3297 | 785.1393 | 693.6159 | 730.6717 | 572.6749 | 551.8372 | -0.22286 | 321.5434 | 391.5885 |
| YMR081C | 74.8514  | 101.8506 | 79.04455 | 77.9025  | 91.02881 | 46.96487 | -0.24438 | 129.2919 | 182.6242 |
| YJL123C | 2789.078 | 2711.4   | 2753.714 | 2999.694 | 2937.12  | 2756.251 | 0.074738 | 3418.928 | 3596.292 |
| YOR173W | 1004.16  | 1115.412 | 1125.397 | 828.2737 | 755.8848 | 831.6695 | -0.42569 | 862.3208 | 731.3749 |
| YGL023C | 1336.961 | 1278.571 | 1368.459 | 1390.604 | 1287.078 | 1475.48  | 0.059996 | 1530.142 | 1989.55  |
| YDR251W | 1478.603 | 1362.622 | 1465.288 | 1271.512 | 1252.51  | 1440.256 | -0.11946 | 1653.812 | 1770.05  |
| YGL117W | 347.7711 | 291.7079 | 302.3454 | 321.4597 | 240.8231 | 292.552  | -0.13981 | 514.9191 | 459.1946 |
| YDR116C | 1723.885 | 1796.723 | 1708.35  | 1704.901 | 1689.218 | 1659.425 | -0.04923 | 1500.91  | 1471.53  |
| YJL107C | 297.1025 | 382.6812 | 517.7418 | 190.7268 | 259.2593 | 487.2605 | -0.35356 | 577.8786 | 786.689  |
| YKL108W | 391.5304 | 365.871  | 400.163  | 375.1856 | 338.7655 | 441.2741 | -0.00292 | 503.6763 | 497.8266 |
| YNL056W | 1092.83  | 1039.271 | 1023.627 | 1009.151 | 1035.885 | 864.9363 | -0.11697 | 1562.746 | 1375.828 |
| YKL217W | 145.0966 | 202.7123 | 187.7308 | 114.6152 | 107.1605 | 147.7436 | -0.53534 | 302.4306 | 331.0064 |

|         |          |          |          |          |          |          |          |          |          |
|---------|----------|----------|----------|----------|----------|----------|----------|----------|----------|
| YLR240W | 454.8662 | 474.6434 | 539.479  | 405.6303 | 459.7531 | 544.9881 | -0.05875 | 663.3237 | 654.1108 |
| YDL085C | 963.8557 | 945.3315 | 992.9971 | 1008.255 | 951.7696 | 917.7718 | -0.01217 | 765.633  | 607.5767 |
| YNL031C | 20435.58 | 18040.4  | 19611.94 | 20444.48 | 20056.3  | 17778.16 | 0.004736 | 15784.86 | 14182.35 |
| YLL013C | 791.1217 | 711.9651 | 805.2663 | 777.2341 | 834.2388 | 1070.408 | 0.216381 | 636.3411 | 618.9908 |
| YOL053W | 209.5839 | 260.065  | 237.1336 | 182.6679 | 179.7531 | 134.0456 | -0.50957 | 291.1879 | 331.8844 |
| YGR268C | 800.3342 | 747.5634 | 690.6517 | 648.2921 | 630.2881 | 517.592  | -0.31764 | 966.8786 | 922.7791 |
| YAR029W | 48.36552 | 60.31927 | 38.53422 | 59.99388 | 50.69959 | 52.83547 | 0.151582 | 26.98266 | 17.56002 |
| YML129C | 1214.896 | 1057.07  | 957.4271 | 856.0321 | 928.7244 | 831.6695 | -0.30367 | 843.2081 | 708.5469 |
| YGL025C | 948.8854 | 885.0122 | 864.5497 | 904.3853 | 925.2676 | 765.1359 | -0.05651 | 1159.13  | 1134.377 |
| YKR093W | 3661.961 | 4770.166 | 3722.01  | 3449.2   | 3182.552 | 3045.867 | -0.32872 | 2484.653 | 2284.559 |
| YGL245W | 9340.303 | 8449.642 | 8928.081 | 9487.092 | 9508.478 | 9850.881 | 0.11058  | 12644.75 | 11740.63 |
| YML013W | 454.8662 | 574.5163 | 558.2521 | 451.2972 | 487.4074 | 600.7589 | -0.04445 | 682.4364 | 768.2509 |
| YBR025C | 11722.88 | 11022.6  | 12447.54 | 12844.06 | 12979.1  | 12659.97 | 0.128936 | 15803.97 | 14784.66 |
| YLR246W | 551.5972 | 628.9025 | 612.5952 | 556.9581 | 533.498  | 499.0017 | -0.17392 | 395.7457 | 382.8085 |
| YML019W | 1090.527 | 1101.568 | 1240.011 | 1035.118 | 1191.44  | 1188.798 | -0.00706 | 875.8122 | 812.151  |
| YBR103W | 808.3951 | 784.1505 | 812.1827 | 843.496  | 770.8643 | 889.3972 | 0.058221 | 1053.448 | 1080.819 |
| YKL071W | 143.945  | 243.2547 | 201.5636 | 220.276  | 201.6461 | 251.4577 | 0.193733 | 93.31503 | 136.9682 |
| YKR024C | 1366.902 | 1650.375 | 1715.267 | 1834.738 | 1989.959 | 2127.117 | 0.330714 | 1351.382 | 1334.562 |
| YFL013C | 204.9777 | 276.8753 | 328.0349 | 233.7075 | 297.284  | 405.072  | 0.208884 | 372.1358 | 545.2387 |
| YGR196C | 452.5631 | 524.0854 | 487.112  | 564.1215 | 532.3457 | 664.3572 | 0.266572 | 711.6676 | 781.421  |
| YLR011W | 176.1887 | 158.2145 | 187.7308 | 179.9816 | 165.9259 | 144.8083 | -0.08953 | 260.8324 | 296.7644 |
| YKL034W | 373.1054 | 376.7482 | 376.4497 | 337.5775 | 313.4157 | 322.8835 | -0.20978 | 449.711  | 418.8065 |
| YCR061W | 846.3966 | 1229.129 | 1002.878 | 928.562  | 871.1112 | 872.7638 | -0.20403 | 623.974  | 529.4346 |
| YOR359W | 1316.233 | 1491.171 | 1488.014 | 1548.2   | 1614.321 | 1690.735 | 0.176155 | 936.5231 | 1034.285 |
| YDR293C | 2638.224 | 2481.989 | 2778.416 | 2548.397 | 2608.724 | 3330.592 | 0.103774 | 3165.965 | 4325.033 |
| YBR108W | 675.9657 | 612.0922 | 679.7831 | 578.4484 | 543.8684 | 620.3276 | -0.17534 | 690.3064 | 854.295  |
| YDL229W | 15506.91 | 16792.49 | 18525.08 | 18635.71 | 18927.08 | 21810.29 | 0.224286 | 23021.83 | 23557.65 |
| YMR205C | 9365.637 | 9755.9   | 10110.79 | 10140.76 | 10258.6  | 12037.68 | 0.150078 | 12787.53 | 13832.03 |
| YLR187W | 346.6195 | 312.4736 | 367.5571 | 306.2374 | 282.3045 | 330.7109 | -0.15941 | 399.1185 | 515.3866 |
| YIL123W | 6574.256 | 6457.128 | 6587.375 | 6559.032 | 6838.684 | 6615.197 | 0.028697 | 7685.561 | 7849.33  |
| YIL137C | 1424.48  | 1412.064 | 1467.264 | 1421.049 | 1537.119 | 1623.223 | 0.090172 | 1689.789 | 1880.678 |
| YHR078W | 918.9448 | 1022.461 | 1136.265 | 1002.883 | 1131.523 | 1079.213 | 0.06236  | 716.1648 | 779.665  |
| YMR160W | 287.89   | 244.2436 | 274.6798 | 221.1715 | 286.9136 | 258.3068 | -0.07415 | 357.5202 | 395.1005 |
| YGL222C | 685.1782 | 760.4183 | 546.3954 | 560.5398 | 561.1523 | 443.2309 | -0.34812 | 408.1127 | 368.7605 |
| YGL216W | 855.609  | 795.0277 | 798.3499 | 719.9265 | 745.5145 | 765.1359 | -0.13477 | 572.2572 | 518.8986 |
| YGR008C | 1669.762 | 1074.87  | 1462.324 | 856.9275 | 913.7449 | 972.5641 | -0.6169  | 2683.65  | 2133.543 |
| YKR022C | 502.0801 | 496.3979 | 516.7537 | 466.5196 | 441.3169 | 457.9074 | -0.14985 | 760.0116 | 643.5748 |
| YJL080C | 6600.742 | 6136.744 | 6591.327 | 6459.639 | 6642.799 | 8207.11  | 0.140747 | 8601.847 | 9090.823 |
| YNL037C | 3778.268 | 4229.271 | 3750.664 | 3592.469 | 3415.309 | 3178.934 | -0.20698 | 2957.974 | 2973.79  |
| YMR320W | 29.94056 | 37.57594 | 21.73725 | 29.54922 | 27.65432 | 41.09426 | 0.139246 | 59.58671 | 43.02205 |
| YBR029C | 2472.399 | 2895.325 | 2601.554 | 2893.138 | 2674.404 | 2376.618 | -0.00455 | 1789.85  | 1968.478 |
| YDR306C | 575.78   | 607.148  | 642.2369 | 493.3825 | 530.0412 | 557.7078 | -0.20707 | 792.6156 | 730.4969 |
| YOR283W | 1454.42  | 1568.301 | 1472.205 | 1604.612 | 1841.317 | 1540.056 | 0.149581 | 1234.457 | 1214.275 |
| YPL200W | 3.45468  | 10.87724 | 6.916398 | 9.849741 | 2.304527 | 15.65496 | 0.388215 | 0        | 0        |
| YPL272C | 41.45616 | 40.54246 | 35.57005 | 20.59491 | 41.48148 | 44.02956 | -0.148   | 82.07226 | 79.8981  |
| YIRO05W | 322.4368 | 368.8375 | 278.632  | 342.9501 | 278.8478 | 286.6814 | -0.09439 | 190.0029 | 209.8423 |
| YNL036W | 7844.426 | 8342.847 | 7219.731 | 3253.996 | 3601.976 | 3436.263 | -1.18538 | 6482.584 | 5887.875 |
| YGL045W | 195.7652 | 263.0316 | 237.1336 | 223.8578 | 244.2799 | 220.1478 | -0.01594 | 349.6503 | 352.9564 |
| YPR144C | 2745.319 | 3098.037 | 2538.318 | 3105.355 | 3021.235 | 2901.059 | 0.107112 | 2386.841 | 2225.733 |
| YHR179W | 7811.031 | 8128.268 | 7843.195 | 8011.421 | 7913.746 | 7977.178 | 0.007252 | 9994.827 | 9556.164 |
| YDR369C | 184.2496 | 197.7681 | 226.265  | 187.1451 | 209.712  | 270.048  | 0.132739 | 360.8931 | 358.2244 |
| YOL092W | 2437.852 | 2647.126 | 2602.542 | 2934.327 | 2768.889 | 2304.214 | 0.058821 | 2101.275 | 1942.138 |
| YOR365C | 24.18276 | 53.39738 | 47.42673 | 67.15733 | 42.63375 | 51.85704 | 0.370849 | 91.06648 | 119.4081 |
| YMR241W | 4272.287 | 4178.84  | 3967.048 | 4028.544 | 3892.346 | 3444.09  | -0.12786 | 3258.156 | 2888.624 |

|           |          |          |          |          |          |          |          |          |          |
|-----------|----------|----------|----------|----------|----------|----------|----------|----------|----------|
| YJL029C   | 894.7621 | 916.6551 | 857.6333 | 873.0453 | 911.4404 | 980.3916 | 0.050889 | 1097.295 | 1124.719 |
| YNR067C   | 856.7606 | 856.3358 | 937.6659 | 943.7843 | 929.8766 | 1098.782 | 0.165242 | 513.7948 | 577.7247 |
| YLR191W   | 686.3297 | 802.9384 | 735.1143 | 810.3651 | 793.9095 | 722.0848 | 0.064669 | 657.7023 | 506.6066 |
| YJR117W   | 2517.31  | 2801.385 | 2625.267 | 2697.038 | 2776.955 | 2652.537 | 0.032781 | 3237.919 | 3454.934 |
| YPL139C   | 903.9746 | 824.6929 | 871.4661 | 989.4513 | 1022.058 | 1080.192 | 0.249815 | 782.4971 | 592.6507 |
| YNR053C   | 5398.513 | 6246.505 | 5683.303 | 6615.444 | 6539.095 | 6163.16  | 0.156791 | 5110.965 | 4659.552 |
| YKL148C   | 2272.028 | 2615.483 | 2406.906 | 2095.309 | 2026.831 | 1939.258 | -0.26714 | 2809.569 | 3348.696 |
| YMR082C   | 5.7578   | 7.910723 | 3.952227 | 1.790862 | 2.304527 | 0.978435 | -1.79613 | 26.98266 | 14.04802 |
| YIR015W   | 175.0371 | 237.3217 | 134.3757 | 187.1451 | 168.2305 | 177.0967 | -0.03813 | 252.9624 | 313.4464 |
| YPL267W   | 354.6805 | 330.2727 | 340.8796 | 356.3815 | 344.5268 | 356.1502 | 0.04326  | 450.8353 | 424.0745 |
| YPR115W   | 773.8483 | 639.7798 | 801.3141 | 599.9388 | 607.2428 | 831.6695 | -0.11951 | 1015.223 | 1142.279 |
| YGR121W-1 | 43.75928 | 37.57594 | 26.67753 | 38.50353 | 24.19753 | 21.52556 | -0.35885 | 10.1185  | 3.512004 |
| YDR398W   | 4397.807 | 4321.233 | 4690.306 | 5247.226 | 5167.902 | 5273.763 | 0.226504 | 4071.009 | 3992.271 |
| YOR106W   | 906.2777 | 808.8715 | 797.3619 | 846.1823 | 815.8025 | 741.6535 | -0.06391 | 1075.934 | 1060.625 |
| YKR096W   | 655.2376 | 621.9806 | 697.5681 | 656.3509 | 580.7408 | 778.834  | 0.029746 | 860.0723 | 933.3151 |
| YHR007C-1 | 123.2169 | 117.672  | 122.519  | 166.5502 | 138.2716 | 154.5927 | 0.338206 | 103.4335 | 77.26409 |
| YML071C   | 773.8483 | 718.887  | 725.2337 | 760.2209 | 786.9959 | 835.5832 | 0.103419 | 891.552  | 1117.695 |
| YCR030C   | 2490.824 | 2153.694 | 2516.581 | 2466.912 | 2396.708 | 3113.379 | 0.155665 | 3172.711 | 3544.49  |
| YNR013C   | 1833.283 | 2194.237 | 2189.534 | 2231.414 | 2348.313 | 2701.458 | 0.227942 | 2575.72  | 2787.653 |
| YBR156C   | 441.0475 | 449.9224 | 475.2553 | 493.3825 | 477.0371 | 557.7078 | 0.161569 | 591.37   | 642.6968 |
| YIL060W   | 5.7578   | 2.966521 | 4.940284 | 4.477155 | 2.304527 | 10.76278 | 0.360572 | 0        | 0        |
| YEL050C   | 1702.006 | 1979.659 | 1874.344 | 1993.229 | 1832.099 | 1733.786 | 0.000806 | 1540.26  | 1381.974 |
| YHR073W   | 1067.496 | 960.1641 | 1227.167 | 1044.073 | 1221.399 | 1537.121 | 0.224403 | 1667.304 | 1747.222 |
| YDL043C   | 642.5704 | 745.5857 | 682.7473 | 757.5346 | 709.7943 | 763.1791 | 0.107112 | 516.0434 | 518.8986 |
| YBL093C   | 3025.148 | 2817.206 | 2646.016 | 2979.994 | 2737.778 | 2294.429 | -0.08329 | 2099.026 | 1978.136 |
| YDL091C   | 559.6581 | 464.755  | 503.909  | 566.8078 | 498.9301 | 599.7805 | 0.124023 | 773.5029 | 683.0848 |
| YGL258W-1 | 0        | 0        | 0.988057 | 0        | 0        | 0        | #NUM!    | 5.621387 | 3.512004 |
| YIL026C   | 633.358  | 503.3198 | 639.2728 | 548.8992 | 638.354  | 907.009  | 0.237851 | 803.8584 | 1090.477 |
| YLR344W   | 6827.599 | 5682.866 | 5852.261 | 5840.897 | 6753.416 | 5848.104 | 0.006248 | 5975.535 | 4691.16  |
| YJL104W   | 1966.864 | 1954.938 | 1984.018 | 2026.36  | 2025.679 | 1860.983 | 0.001758 | 1760.619 | 1709.468 |
| YBR032W   | 33.39524 | 28.67637 | 43.4745  | 45.66698 | 25.3498  | 56.74921 | 0.27563  | 19.11272 | 11.41401 |
| YER084W   | 88.67012 | 93.93984 | 63.23564 | 51.03957 | 46.09054 | 44.02956 | -0.80042 | 116.9249 | 123.7982 |
| YDR349C   | 2073.959 | 2285.21  | 2267.59  | 2273.499 | 2463.539 | 2308.127 | 0.08833  | 1790.974 | 1768.294 |
| YEL038W   | 2300.817 | 2225.88  | 2109.501 | 2054.119 | 2085.597 | 1823.802 | -0.15419 | 1737.009 | 1529.478 |
| YDR517W   | 2237.481 | 2494.844 | 2227.08  | 2250.218 | 2274.568 | 2100.699 | -0.07094 | 2960.223 | 2864.918 |
| YOR340C   | 3474.256 | 3569.714 | 3295.17  | 4310.605 | 4133.169 | 3639.777 | 0.224928 | 3131.113 | 3059.834 |
| YDR305C   | 644.8736 | 556.7172 | 562.2043 | 550.6901 | 472.428  | 461.8212 | -0.24828 | 433.9711 | 369.6385 |
| YJL151C   | 1660.549 | 1460.517 | 1678.709 | 1645.802 | 1560.165 | 1292.512 | -0.09353 | 2346.367 | 2028.182 |
| YFL028C   | 604.569  | 559.6837 | 496.0045 | 644.7103 | 589.9589 | 534.2254 | 0.091441 | 960.133  | 838.491  |
| YML020W   | 621.8424 | 516.1747 | 539.479  | 539.0495 | 495.4733 | 535.2038 | -0.0958  | 659.9509 | 733.1309 |
| YIL101C   | 84.06388 | 112.7278 | 89.91317 | 81.48422 | 74.89713 | 86.10225 | -0.24168 | 159.6474 | 144.8702 |
| YOR324C   | 446.8053 | 462.7773 | 451.542  | 495.1734 | 428.642  | 374.7405 | -0.06789 | 246.2168 | 323.9824 |
| YDR289C   | 643.722  | 443.0005 | 538.491  | 514.8728 | 444.7737 | 548.9019 | -0.10747 | 788.1185 | 733.1309 |
| YKR021W   | 654.086  | 643.7351 | 699.5442 | 671.5733 | 699.4239 | 947.1248 | 0.214858 | 881.4335 | 991.2632 |
| YMR027W   | 2320.393 | 2121.063 | 2123.334 | 1878.614 | 1931.194 | 2036.123 | -0.16732 | 2723     | 2595.371 |
| YPR108W   | 2757.986 | 2528.465 | 2708.264 | 2586.005 | 2575.309 | 2812.021 | -0.00386 | 3144.604 | 3242.458 |
| YEL012W   | 331.6493 | 361.9156 | 333.9632 | 279.3745 | 296.1317 | 325.8188 | -0.18906 | 502.552  | 430.2205 |
| YLR069C   | 1680.126 | 2163.583 | 1872.368 | 1769.372 | 1727.243 | 1760.204 | -0.12084 | 1448.069 | 1532.112 |
| YJR094C   | 32.24368 | 29.66521 | 44.46256 | 44.77155 | 18.43622 | 17.61182 | -0.39633 | 12.36705 | 9.658012 |
| YGL136C   | 482.5036 | 578.4717 | 507.8612 | 512.1865 | 510.4527 | 478.4546 | -0.06368 | 319.2948 | 379.2965 |
| YNL059C   | 1073.254 | 954.231  | 1231.119 | 1036.909 | 1160.329 | 1414.817 | 0.148566 | 1534.639 | 1522.454 |
| YER152C   | 831.4263 | 925.5546 | 746.971  | 695.7499 | 781.2346 | 577.2765 | -0.28559 | 634.0925 | 435.4885 |
| YJL088W   | 406.5007 | 546.8288 | 377.4377 | 348.3227 | 405.5967 | 305.2716 | -0.3293  | 197.8728 | 188.7702 |
| YLR060W   | 8410.994 | 8061.027 | 9122.729 | 9350.091 | 9622.552 | 11614.02 | 0.257055 | 11973.56 | 11851.26 |

|           |          |          |          |          |          |          |          |          |          |
|-----------|----------|----------|----------|----------|----------|----------|----------|----------|----------|
| YLR154C   | 1501.634 | 1114.423 | 1221.238 | 1234.799 | 1274.403 | 1099.761 | -0.08851 | 1002.856 | 839.369  |
| YDR148C   | 2462.035 | 2398.927 | 2432.596 | 2398.86  | 2427.819 | 2451.957 | -0.00295 | 2932.116 | 3057.2   |
| YDL072C   | 2274.331 | 1941.094 | 2199.414 | 1952.935 | 2185.844 | 1780.751 | -0.11593 | 3459.402 | 2643.661 |
| YHR041C   | 1546.545 | 1577.2   | 1269.653 | 1592.076 | 1326.255 | 1076.278 | -0.13728 | 1050.075 | 759.4709 |
| YMR279C   | 97.88259 | 100.8617 | 147.2205 | 139.6872 | 97.94239 | 127.1965 | 0.076584 | 195.6243 | 176.4782 |
| YDR030C   | 301.7087 | 276.8753 | 261.8351 | 288.3288 | 371.0288 | 354.1934 | 0.270238 | 204.6185 | 136.9682 |
| YIL076W   | 2698.105 | 2178.415 | 2600.566 | 2825.085 | 2554.568 | 2652.537 | 0.103317 | 3698.873 | 3142.366 |
| YJL201W   | 618.3877 | 668.4561 | 635.3205 | 639.3378 | 659.0947 | 603.6942 | -0.01512 | 432.8468 | 447.7805 |
| YCR023C   | 542.3847 | 709.9874 | 606.6669 | 650.0829 | 573.8272 | 608.5864 | -0.02075 | 962.3815 | 847.271  |
| YNL275W   | 292.4962 | 312.4736 | 313.214  | 194.3085 | 243.1276 | 282.7676 | -0.35038 | 403.6156 | 431.0985 |
| YOR078W   | 2664.71  | 2584.829 | 2699.371 | 3001.485 | 2916.379 | 2720.049 | 0.119926 | 2290.153 | 2353.921 |
| YMR059W   | 331.6493 | 307.5294 | 286.5365 | 274.8973 | 282.3045 | 181.0104 | -0.32653 | 193.3757 | 189.6482 |
| YDR224C   | 18193.5  | 17421.39 | 16318.75 | 17185.11 | 17002.8  | 15108.99 | -0.07517 | 13778.02 | 12601.95 |
| YHR069C   | 1840.193 | 2298.065 | 2028.481 | 2347.82  | 2166.255 | 1931.43  | 0.063786 | 1593.101 | 1601.474 |
| YBR087W   | 723.1796 | 833.5925 | 793.4096 | 900.8036 | 875.7202 | 814.0577 | 0.140504 | 1081.555 | 1171.253 |
| YPL172C   | 476.7458 | 512.2193 | 474.2673 | 495.1734 | 480.4939 | 400.1798 | -0.08884 | 287.815  | 363.4924 |
| YNL138W-f | 460.624  | 391.5808 | 392.2586 | 399.3622 | 392.9218 | 328.7541 | -0.15069 | 300.1821 | 236.1823 |
| YMR153W   | 794.5764 | 864.2465 | 784.5171 | 794.2473 | 830.782  | 1014.637 | 0.111501 | 974.7486 | 1112.427 |
| YHR160C   | 247.5854 | 165.1364 | 192.6711 | 136.1055 | 161.3169 | 134.0456 | -0.48862 | 105.6821 | 80.7761  |
| YDR001C   | 2357.243 | 2426.614 | 2381.217 | 2069.341 | 2090.206 | 2083.088 | -0.19883 | 2853.416 | 2731.461 |
| YEL006W   | 1061.738 | 1147.055 | 1079.946 | 1074.517 | 1126.914 | 1084.106 | -0.00141 | 905.0434 | 807.761  |
| YIL090W   | 1477.451 | 1847.154 | 1559.154 | 1688.783 | 1617.778 | 1353.175 | -0.06774 | 1163.627 | 1226.568 |
| YER136W   | 2413.67  | 2511.655 | 2614.398 | 2256.486 | 2310.288 | 2459.785 | -0.10169 | 2917.5   | 2952.718 |
| YOR127W   | 802.6373 | 855.347  | 960.3912 | 914.2351 | 965.5968 | 1251.418 | 0.258067 | 1286.173 | 1331.05  |
| YJR126C   | 1131.983 | 1266.705 | 1195.549 | 1258.976 | 1366.584 | 1521.466 | 0.206392 | 1524.52  | 1743.71  |
| YPR128C   | 1324.294 | 1410.086 | 1291.39  | 1381.65  | 1466.831 | 1294.469 | 0.041394 | 1155.757 | 923.6571 |
| YHL015W-f | 24.18276 | 33.62057 | 45.45061 | 13.43147 | 16.13169 | 14.67652 | -1.22278 | 4.49711  | 7.90201  |
| YJL038C   | 71.39672 | 63.28579 | 69.16398 | 89.5431  | 69.13581 | 76.31791 | 0.205158 | 35.97688 | 38.63205 |
| YHR068W   | 4924.07  | 4554.599 | 4871.12  | 5404.822 | 4745.021 | 4505.692 | 0.030416 | 6753.535 | 5951.091 |
| YFR004W   | 2159.175 | 2266.422 | 2159.892 | 2181.27  | 2090.206 | 1809.126 | -0.11508 | 2755.604 | 2814.871 |
| YMR289W   | 730.089  | 762.396  | 680.7712 | 676.9459 | 784.6914 | 694.6886 | -0.01128 | 500.3035 | 479.3886 |
| YLR387C   | 1140.044 | 1115.412 | 1032.519 | 1036.909 | 1043.951 | 1159.445 | -0.02107 | 1452.567 | 1423.24  |
| YCL047C   | 552.7488 | 548.8064 | 527.6223 | 535.4678 | 600.3293 | 486.2821 | -0.0063  | 428.3497 | 331.8844 |
| YLR018C   | 1842.496 | 1791.779 | 1801.228 | 2101.577 | 1877.037 | 1854.134 | 0.101762 | 1485.171 | 1446.946 |
| YML092C   | 3044.724 | 2920.046 | 2916.744 | 2797.327 | 2795.391 | 2701.458 | -0.09871 | 3870.887 | 3382.938 |
| YDR227W   | 610.3268 | 509.2528 | 724.2457 | 776.3387 | 728.2305 | 1140.855 | 0.520797 | 893.8006 | 1227.446 |
| YBL028C   | 2307.726 | 2428.592 | 2171.749 | 2663.012 | 2712.428 | 2210.284 | 0.135005 | 2126.009 | 1898.238 |
| YLR264W   | 3998.216 | 3601.357 | 3942.347 | 4541.626 | 4496.132 | 4744.43  | 0.255922 | 3749.465 | 3689.361 |
| YFL034C-f | 879.7918 | 956.2087 | 911.9765 | 966.1701 | 966.749  | 757.3085 | -0.03064 | 1204.101 | 1200.227 |
| YBR242W   | 2491.976 | 2616.472 | 2345.647 | 2884.183 | 2770.041 | 2323.782 | 0.097995 | 2111.393 | 1758.636 |
| YBR112C   | 2774.108 | 2583.84  | 2847.58  | 2787.477 | 2707.819 | 3294.39  | 0.099215 | 3137.858 | 4098.509 |
| YMR238W   | 1773.402 | 2045.911 | 1800.24  | 1856.229 | 1683.457 | 1602.676 | -0.12802 | 1378.364 | 1344.22  |
| YMR164C   | 462.9271 | 463.7662 | 553.3118 | 360.8587 | 449.3828 | 525.4194 | -0.14805 | 561.0145 | 804.249  |
| YKL067W   | 1308.172 | 1154.966 | 1272.617 | 1053.922 | 1073.91  | 1083.127 | -0.2184  | 1808.962 | 1628.692 |
| YIL088C   | 1442.905 | 1538.636 | 1487.026 | 1422.84  | 1400     | 1241.634 | -0.13674 | 1142.266 | 1015.847 |
| YOL152W   | 434.1381 | 559.6837 | 484.1478 | 319.6689 | 336.4609 | 350.2796 | -0.5544  | 285.5665 | 252.8643 |
| YJR119C   | 188.8558 | 213.5895 | 191.683  | 182.6679 | 197.0371 | 237.7596 | 0.055582 | 116.9249 | 139.6022 |
| YIR006C   | 4948.253 | 4120.498 | 4871.12  | 4784.288 | 5052.675 | 5873.544 | 0.172512 | 6186.899 | 6780.802 |
| YBR132C   | 102.4888 | 136.46   | 110.6624 | 91.33396 | 61.06996 | 59.68452 | -0.72109 | 184.3815 | 156.2842 |
| YKL100C   | 1145.802 | 1197.486 | 1081.922 | 1069.145 | 977.1194 | 1101.717 | -0.12177 | 1408.72  | 1369.682 |
| YDL040C   | 2845.505 | 2579.885 | 2852.52  | 2771.359 | 2854.157 | 3321.786 | 0.112186 | 3493.13  | 3675.312 |
| YAL033W   | 536.6269 | 462.7773 | 540.4671 | 547.1084 | 599.177  | 524.441  | 0.117666 | 420.4798 | 384.5645 |
| YGR093W   | 1003.009 | 1066.959 | 941.6182 | 1003.778 | 1106.173 | 1181.949 | 0.128397 | 786.9942 | 836.735  |
| YDR043C   | 831.4263 | 960.1641 | 702.5084 | 666.2007 | 592.2634 | 517.592  | -0.48984 | 365.3902 | 442.5125 |

|         |          |          |          |          |          |          |          |          |          |
|---------|----------|----------|----------|----------|----------|----------|----------|----------|----------|
| YOR380W | 505.5348 | 451.9001 | 481.1837 | 430.7023 | 468.9712 | 392.3523 | -0.15505 | 304.6792 | 335.3964 |
| YGL040C | 3698.811 | 4228.282 | 3800.067 | 3699.921 | 3727.572 | 3322.764 | -0.12548 | 3071.526 | 2821.017 |
| YDL178W | 2137.295 | 2612.516 | 2159.892 | 2157.093 | 2190.453 | 2057.648 | -0.10938 | 1588.604 | 1621.668 |
| YPR028W | 10092.27 | 8484.251 | 9956.649 | 10351.18 | 10592.76 | 10076.9  | 0.120598 | 9279.786 | 8458.662 |
| YKL202W | 21.87964 | 8.899564 | 6.916398 | 9.849741 | 10.37037 | 8.805912 | -0.37705 | 42.72254 | 30.73004 |
| YDR333C | 842.9419 | 908.7444 | 934.7018 | 758.4301 | 884.9383 | 1091.933 | 0.026032 | 1107.413 | 1275.736 |
| YLR380W | 2582.949 | 2603.617 | 2662.813 | 2678.234 | 2839.177 | 2665.256 | 0.059993 | 3321.116 | 2871.942 |
| YHR080C | 861.3668 | 815.7934 | 1075.006 | 822.0057 | 829.6297 | 1107.588 | 0.003695 | 612.7312 | 604.0647 |
| YFR017C | 1655.943 | 1425.908 | 1423.79  | 1243.754 | 1013.992 | 915.8149 | -0.50563 | 1104.04  | 918.3891 |
| YHR005C | 5070.318 | 4449.782 | 4421.554 | 4518.345 | 4674.733 | 4345.229 | -0.04235 | 4391.428 | 4004.563 |
| YNL014W | 149.7028 | 204.69   | 170.9338 | 144.1644 | 106.0082 | 135.024  | -0.44762 | 73.07804 | 76.38609 |
| YNR004W | 259.101  | 291.7079 | 305.3096 | 281.1653 | 261.5638 | 267.1127 | -0.08017 | 191.1272 | 205.4523 |
| YGR203W | 859.0637 | 856.3358 | 950.5107 | 981.3924 | 872.2634 | 770.0281 | -0.02303 | 704.922  | 630.4048 |
| YDR262W | 409.9553 | 536.9404 | 489.0881 | 396.6759 | 414.8148 | 328.7541 | -0.3327  | 625.0983 | 575.9687 |
| YDL059C | 256.7979 | 299.6187 | 225.277  | 213.1126 | 229.3004 | 189.8163 | -0.30615 | 264.2052 | 345.0544 |
| YDL150W | 1087.073 | 1093.658 | 1018.687 | 1447.017 | 1344.691 | 1199.561 | 0.319039 | 996.1098 | 885.0251 |
| YGR010W | 242.9791 | 313.4624 | 273.6917 | 298.1785 | 269.6297 | 267.1127 | 0.008296 | 322.6676 | 356.4684 |
| YDL143W | 4904.494 | 5182.513 | 5288.08  | 5627.784 | 5587.326 | 5667.094 | 0.134909 | 6524.182 | 6373.41  |
| YNL162W | 423.7741 | 496.3979 | 411.0316 | 471.8922 | 475.8848 | 365.9346 | -0.01908 | 351.8989 | 312.5684 |
| YKR014C | 3310.735 | 2876.537 | 3262.564 | 2795.536 | 3001.646 | 2605.572 | -0.16943 | 2346.367 | 2128.275 |
| YPL080C | 202.6745 | 187.8797 | 132.3996 | 230.1258 | 190.1235 | 150.6789 | 0.126626 | 120.2977 | 82.5321  |
| YJR085C | 1635.215 | 1567.312 | 1544.333 | 1439.853 | 1414.98  | 1395.248 | -0.15948 | 1432.33  | 1210.763 |
| YKR028W | 1657.095 | 1811.556 | 1702.422 | 1779.221 | 1913.91  | 1940.236 | 0.123534 | 1344.636 | 1453.092 |
| YOR119C | 1346.174 | 1416.02  | 1393.16  | 1504.324 | 1444.938 | 1635.943 | 0.142015 | 1113.035 | 1179.155 |
| YER100W | 1543.09  | 1523.803 | 1542.357 | 1595.658 | 1477.202 | 1418.73  | -0.03731 | 2121.512 | 1808.682 |
| YNL027W | 726.6343 | 710.9763 | 770.6843 | 700.2271 | 685.5968 | 880.5912 | 0.037479 | 1068.064 | 983.3612 |
| YMR318C | 4024.702 | 4854.218 | 4086.603 | 4489.691 | 4125.103 | 4016.475 | -0.03768 | 3599.936 | 3353.964 |
| YER169W | 1782.615 | 1809.578 | 1822.965 | 1776.535 | 1723.786 | 1768.032 | -0.03965 | 1119.78  | 1427.63  |
| YBR148W | 126.6716 | 119.6497 | 124.4952 | 83.27509 | 92.18108 | 99.80034 | -0.42993 | 137.1619 | 146.6262 |
| YNL125C | 1257.503 | 1461.506 | 1221.238 | 1298.375 | 1292.84  | 1283.706 | -0.02412 | 1020.844 | 1078.185 |
| YPR068C | 223.4026 | 247.2101 | 254.9187 | 257.8841 | 223.5391 | 287.6598 | 0.084101 | 156.2746 | 117.6521 |
| YPR065W | 4629.271 | 5053.963 | 5518.297 | 4521.031 | 4551.441 | 5308.987 | -0.08001 | 5175.049 | 6231.174 |
| YCR027C | 716.2703 | 693.1771 | 608.643  | 568.5987 | 573.8272 | 579.2334 | -0.22919 | 491.3093 | 520.6546 |
| YPR033C | 5078.379 | 4925.414 | 4780.219 | 5202.454 | 4893.663 | 5066.335 | 0.036465 | 6357.789 | 5912.459 |
| YAR064W | 18.42496 | 29.66521 | 34.58199 | 42.98069 | 34.5679  | 26.41774 | 0.330643 | 8.99422  | 15.80402 |
| YKL216W | 12501.33 | 13425.49 | 13178.7  | 14085.13 | 14122.14 | 13448.59 | 0.091147 | 17522.99 | 15577.5  |
| YLR143W | 626.4486 | 629.8914 | 674.8428 | 658.1418 | 710.9466 | 754.3732 | 0.136933 | 902.7948 | 906.9751 |
| YFL033C | 1122.771 | 978.952  | 1220.25  | 1056.609 | 1194.897 | 1337.52  | 0.111552 | 622.8497 | 776.1529 |
| YOR290C | 1115.862 | 1303.292 | 1237.047 | 1129.139 | 1126.914 | 1298.383 | -0.04072 | 1448.069 | 1661.178 |
| YJL008C | 2717.681 | 3323.493 | 3364.333 | 3168.93  | 2978.601 | 3500.839 | 0.03678  | 3973.197 | 3968.565 |
| YOR222W | 1684.732 | 1616.754 | 1656.971 | 1683.41  | 1532.51  | 1367.852 | -0.11336 | 2103.523 | 1927.212 |
| YML087C | 153.1575 | 179.969  | 122.519  | 131.6284 | 132.5103 | 123.2828 | -0.23401 | 60.71098 | 79.0201  |
| YJR044C | 1460.178 | 1348.778 | 1418.85  | 1437.167 | 1398.848 | 1284.685 | -0.03702 | 1263.688 | 1038.675 |
| YBR263W | 5753.193 | 6114     | 5911.544 | 6072.813 | 5436.379 | 5258.108 | -0.0845  | 4770.309 | 4787.74  |
| YPL033C | 5.7578   | 7.910723 | 12.84474 | 13.43147 | 9.218108 | 1.956869 | -0.10768 | 0        | 0        |
| YNR055C | 1324.294 | 1431.841 | 1332.889 | 1380.755 | 1464.527 | 1549.841 | 0.104147 | 1814.584 | 1836.778 |
| YDR042C | 56.42644 | 67.24115 | 73.11621 | 62.68017 | 59.9177  | 36.20208 | -0.3094  | 20.23699 | 21.07203 |
| YOR004W | 2443.61  | 2375.195 | 2269.567 | 2801.804 | 2737.778 | 2518.491 | 0.184981 | 2264.295 | 2045.743 |
| YML005W | 565.4159 | 639.7798 | 624.4519 | 607.9977 | 639.5062 | 649.6807 | 0.052294 | 433.9711 | 415.2945 |
| YLR176C | 214.1901 | 207.6565 | 250.9664 | 202.3674 | 213.1687 | 253.4146 | -0.00831 | 310.3006 | 317.8364 |
| YLR178C | 4214.709 | 4159.063 | 4054.985 | 3429.501 | 3275.885 | 3172.085 | -0.33147 | 6211.633 | 5396.195 |
| YOR260W | 2532.28  | 2629.327 | 2605.506 | 2728.378 | 2946.338 | 3001.838 | 0.159744 | 3341.353 | 3541.856 |
| YGR202C | 3293.461 | 3189.999 | 3214.149 | 3219.97  | 2988.971 | 3049.781 | -0.06682 | 2414.948 | 2464.549 |
| YDR046C | 3720.69  | 4548.666 | 3940.371 | 3892.439 | 3581.235 | 3434.306 | -0.16265 | 2494.772 | 2609.419 |

|         |          |          |          |          |          |          |          |          |          |
|---------|----------|----------|----------|----------|----------|----------|----------|----------|----------|
| YDR104C | 333.9524 | 375.7594 | 464.3867 | 413.6891 | 334.1564 | 476.4977 | 0.060455 | 231.6012 | 229.1583 |
| YJL210W | 561.9613 | 526.0631 | 508.8493 | 458.4607 | 429.7943 | 325.8188 | -0.39539 | 362.0173 | 250.2303 |
| YOR006C | 1582.243 | 1608.843 | 1440.587 | 1725.496 | 1706.502 | 1501.897 | 0.091193 | 1374.991 | 1249.396 |
| YOR108W | 2073.959 | 2581.862 | 2321.934 | 2558.246 | 2795.391 | 2582.089 | 0.185599 | 1645.942 | 1830.632 |
| YCL018W | 847.5481 | 756.4629 | 806.2544 | 884.6859 | 713.2511 | 821.8852 | 0.005709 | 1056.821 | 878.8791 |
| YGR016W | 41.45616 | 48.45318 | 48.41478 | 55.51672 | 47.2428  | 42.07269 | 0.06633  | 119.1734 | 74.63009 |
| YIL009W | 1294.353 | 1398.22  | 1561.13  | 1398.663 | 1561.317 | 1714.218 | 0.135999 | 1833.697 | 1847.314 |
| YCR017C | 2137.295 | 2081.509 | 2246.841 | 2149.034 | 2104.033 | 1992.093 | -0.05006 | 2565.601 | 2484.743 |
| YEL031W | 4943.647 | 4786.977 | 5057.863 | 5009.937 | 5374.157 | 6183.707 | 0.163908 | 6275.717 | 6858.066 |
| YCL008C | 760.0296 | 781.1839 | 801.3141 | 757.5346 | 828.4774 | 753.3947 | -0.00192 | 1030.962 | 954.3872 |
| YNL065W | 938.5214 | 1385.365 | 1103.659 | 1476.566 | 1285.926 | 1270.008 | 0.234498 | 809.4798 | 839.369  |
| YKL106W | 1296.656 | 1514.904 | 1397.112 | 1514.174 | 1605.103 | 1693.67  | 0.193555 | 1122.029 | 1144.913 |
| YNR046W | 3499.591 | 3108.914 | 3179.567 | 3753.647 | 3613.498 | 3241.554 | 0.116151 | 3160.344 | 2781.507 |
| YDR487C | 2524.219 | 2315.864 | 2415.799 | 2522.429 | 2317.202 | 2192.672 | -0.04515 | 3777.572 | 2929.012 |
| YBL091C | 4155.98  | 3822.857 | 3982.857 | 4240.761 | 4301.4   | 4404.913 | 0.114204 | 5557.304 | 5096.796 |
| YDL017W | 191.1589 | 263.0316 | 244.05   | 222.9623 | 195.8848 | 237.7596 | -0.08869 | 306.9278 | 352.0784 |
| YJR096W | 2082.02  | 2013.279 | 2051.206 | 1777.431 | 1682.305 | 1558.647 | -0.29254 | 2890.517 | 2748.143 |
| YDR347W | 1676.671 | 1819.466 | 1841.738 | 1704.005 | 1691.523 | 1520.488 | -0.11878 | 1430.081 | 1390.754 |
| YPR118W | 1670.913 | 1678.062 | 1418.85  | 1618.939 | 1492.181 | 1424.601 | -0.072   | 2410.451 | 1910.53  |
| YOR153W | 2891.567 | 3406.555 | 3241.814 | 3067.747 | 2562.634 | 3186.762 | -0.11367 | 3481.887 | 4072.169 |
| YER092W | 973.0681 | 1101.568 | 920.869  | 915.1305 | 727.0782 | 744.5888 | -0.32772 | 582.3757 | 662.8908 |
| YJR012C | 380.0148 | 390.592  | 390.2824 | 384.1399 | 349.1358 | 352.2365 | -0.09685 | 281.0694 | 199.3062 |
| YCL021W | 32.24368 | 21.75449 | 11.85668 | 21.49034 | 24.19753 | 9.784347 | -0.24752 | 59.58671 | 66.72808 |
| YJL156C | 789.9701 | 952.2533 | 953.4748 | 825.5874 | 928.7244 | 1119.329 | 0.092221 | 631.8439 | 623.3808 |
| YFL055W | 115.156  | 208.6453 | 169.9458 | 148.6416 | 111.7696 | 126.2181 | -0.35282 | 55.0896  | 68.48408 |
| YPL206C | 1331.203 | 1474.361 | 1491.966 | 1207.041 | 1284.774 | 1268.051 | -0.19283 | 1719.02  | 1612.888 |
| YOR213C | 278.6775 | 365.871  | 422.8883 | 371.6039 | 394.0741 | 384.5248 | 0.107738 | 600.3642 | 563.6767 |
| YAR042W | 1059.435 | 1143.1   | 1147.134 | 1198.982 | 1232.922 | 1468.631 | 0.219653 | 1324.399 | 1748.1   |
| YMR176W | 567.719  | 590.3377 | 593.8222 | 498.7551 | 565.7614 | 669.2493 | -0.01499 | 363.1416 | 414.4165 |
| YKL013C | 2422.882 | 2367.284 | 2542.27  | 2183.061 | 2263.045 | 2216.155 | -0.13828 | 3472.893 | 2921.11  |
| YDR264C | 1220.654 | 1344.823 | 1423.79  | 1148.838 | 1243.292 | 1451.997 | -0.05347 | 1531.266 | 1708.59  |
| YNL045W | 2034.806 | 1835.288 | 1747.873 | 1735.345 | 1593.58  | 1738.678 | -0.14874 | 2282.283 | 2094.911 |
| YLL051C | 604.569  | 627.9137 | 644.2131 | 521.1409 | 565.7614 | 582.1687 | -0.16915 | 766.7572 | 805.127  |
| YKR099W | 978.8259 | 959.1752 | 1111.564 | 1105.857 | 1062.387 | 1303.275 | 0.186964 | 761.1359 | 848.149  |
| YPR146C | 111.7013 | 86.02912 | 71.14009 | 74.32078 | 86.41976 | 86.10225 | -0.12332 | 55.0896  | 38.63205 |
| YMR003W | 343.1649 | 310.4959 | 376.4497 | 379.6628 | 424.033  | 335.6031 | 0.145347 | 224.8555 | 259.8883 |
| YMR194W | 8924.59  | 7059.332 | 7699.927 | 8246.92  | 8547.49  | 7824.542 | 0.055866 | 7629.347 | 6461.21  |
| YPL214C | 864.8215 | 869.1907 | 834.908  | 826.4828 | 808.889  | 825.7989 | -0.06182 | 673.4422 | 575.9687 |
| YKR036C | 445.6537 | 406.4134 | 404.1152 | 464.7287 | 435.5556 | 466.7134 | 0.121965 | 580.1272 | 649.7208 |
| YDR173C | 86.367   | 114.7055 | 91.88928 | 73.42534 | 103.7037 | 76.31791 | -0.20903 | 132.6647 | 168.5762 |
| YFR024C | 1879.346 | 2135.895 | 1836.798 | 1790.862 | 1787.161 | 1537.121 | -0.19416 | 2412.699 | 2310.021 |
| YKR043C | 4134.1   | 4008.759 | 4109.328 | 4197.781 | 4104.362 | 3640.756 | -0.03689 | 5078.361 | 4946.658 |
| YLR349W | 8.06092  | 12.85493 | 16.79697 | 20.59491 | 8.065844 | 15.65496 | 0.232764 | 43.84682 | 42.14405 |
| YJR146W | 82.91232 | 85.04028 | 63.23564 | 70.73905 | 51.85186 | 56.74921 | -0.36637 | 25.85838 | 40.38805 |
| YGR140W | 450.2599 | 434.101  | 483.1598 | 490.6962 | 533.498  | 580.2118 | 0.230477 | 745.396  | 654.9888 |
| YKL129C | 504.3833 | 513.2082 | 588.8819 | 433.3886 | 429.7943 | 452.0368 | -0.28859 | 546.3989 | 743.6669 |
| YLR021W | 404.1975 | 422.2349 | 386.3302 | 461.147  | 445.926  | 424.6407 | 0.134987 | 649.8324 | 534.7027 |
| YLR173W | 454.8662 | 518.1524 | 465.3748 | 491.5916 | 548.4774 | 499.9801 | 0.098518 | 297.9335 | 331.0064 |
| YHR034C | 902.823  | 811.838  | 748.9471 | 750.3712 | 709.7943 | 630.112  | -0.23708 | 604.8613 | 481.1446 |
| YKL117W | 8025.221 | 7332.252 | 7702.891 | 7248.514 | 7462.058 | 7114.199 | -0.07945 | 10417.56 | 9499.972 |
| YKL019W | 2284.695 | 2599.661 | 2330.826 | 2510.789 | 2437.037 | 2230.831 | -0.00732 | 1959.616 | 1788.488 |
| YKL204W | 1526.968 | 1523.803 | 1579.903 | 1437.167 | 1700.741 | 1737.7   | 0.07436  | 1848.312 | 2000.964 |
| YBR192W | 884.398  | 948.298  | 928.7734 | 963.4838 | 914.8972 | 969.6288 | 0.044518 | 774.6272 | 741.9109 |
| YPR129W | 1083.618 | 1131.233 | 1266.689 | 1324.342 | 1202.963 | 1320.887 | 0.144455 | 1390.731 | 1626.936 |



|           |          |          |          |          |          |          |          |          |          |
|-----------|----------|----------|----------|----------|----------|----------|----------|----------|----------|
| YBR276C   | 1266.716 | 1111.457 | 1255.82  | 1252.708 | 1298.601 | 1397.205 | 0.119754 | 1520.023 | 1624.302 |
| YKL218C   | 158.9153 | 226.4445 | 190.695  | 223.8578 | 164.7737 | 137.9593 | -0.12952 | 402.4913 | 338.0304 |
| YPR145W   | 11724.03 | 11342    | 12390.23 | 12410.67 | 12657.61 | 13590.46 | 0.124754 | 13880.33 | 14588.87 |
| YKR078W   | 329.3461 | 255.1208 | 278.632  | 265.943  | 283.4568 | 304.2932 | -0.01581 | 380.0058 | 412.6605 |
| YOL036W   | 1049.071 | 1026.416 | 1070.066 | 1064.667 | 1270.947 | 1300.34  | 0.20902  | 1258.066 | 1535.624 |
| YCR051W   | 2197.176 | 2163.583 | 1986.982 | 2674.652 | 2176.626 | 1670.188 | 0.038953 | 3396.442 | 3075.638 |
| YKL142W   | 2224.814 | 1912.417 | 1945.484 | 1660.129 | 1576.296 | 1591.913 | -0.33319 | 2761.225 | 2411.869 |
| YBR162W-1 | 2076.263 | 1787.824 | 1614.485 | 1746.986 | 1909.301 | 1518.531 | -0.08229 | 1432.33  | 1328.416 |
| YMR274C   | 398.4397 | 460.7996 | 401.1511 | 376.081  | 417.1194 | 377.6758 | -0.10628 | 321.5434 | 251.9863 |
| YMR275C   | 771.5452 | 809.8603 | 703.4965 | 795.1428 | 742.0577 | 1009.745 | 0.156636 | 971.3757 | 1088.721 |
| YMR148W   | 886.7012 | 872.1573 | 767.7202 | 799.6199 | 735.1441 | 647.7238 | -0.21121 | 630.7197 | 538.2147 |
| YOR239W   | 2847.808 | 2334.652 | 3085.701 | 3118.786 | 3303.539 | 4175.959 | 0.358192 | 3723.607 | 4338.203 |
| YGR161W-1 | 830.2747 | 857.3247 | 784.5171 | 502.3368 | 451.6873 | 295.4873 | -0.98438 | 980.37   | 892.9271 |
| YBR067C   | 14047.88 | 16030.09 | 13453.38 | 17568.36 | 16987.82 | 13846.81 | 0.153041 | 19201.54 | 16659.19 |
| YJR093C   | 981.1291 | 876.1126 | 841.8244 | 808.5742 | 899.9178 | 836.5617 | -0.08476 | 641.9624 | 618.1128 |
| YJL122W   | 4836.552 | 4998.588 | 4744.649 | 6053.114 | 5840.824 | 4798.244 | 0.195203 | 4787.174 | 4483.073 |
| YOR316C-1 | 14.97028 | 24.72101 | 11.85668 | 23.28121 | 11.52263 | 24.46087 | 0.201258 | 1.124277 | 2.634003 |
| YER040W   | 418.0163 | 326.3173 | 425.8525 | 399.3622 | 345.679  | 532.2685 | 0.12637  | 492.4335 | 648.8428 |
| YEL032W   | 1220.654 | 1301.314 | 1441.575 | 1434.481 | 1305.515 | 1580.172 | 0.124297 | 1023.093 | 1009.701 |
| YER048C   | 2713.075 | 2429.581 | 2705.3   | 2597.645 | 2586.831 | 2654.493 | -0.00165 | 3572.954 | 3274.066 |
| YLR193C   | 1207.986 | 1105.524 | 1037.46  | 892.7447 | 994.4034 | 807.2086 | -0.31464 | 803.8584 | 912.2431 |
| YPR042C   | 268.3135 | 345.1053 | 330.999  | 316.0872 | 298.4362 | 458.8859 | 0.184703 | 366.5145 | 590.0167 |
| YBR219C   | 32.24368 | 41.5313  | 31.61782 | 61.78474 | 44.93828 | 52.83547 | 0.598309 | 12.36705 | 22.82803 |
| YLR165C   | 297.1025 | 286.7637 | 263.8112 | 250.7207 | 246.5844 | 217.2125 | -0.24655 | 156.2746 | 198.4282 |
| YPL198W   | 3037.815 | 3244.385 | 3505.626 | 3698.13  | 3599.671 | 3607.489 | 0.155968 | 3228.925 | 3089.686 |
| YNL039W   | 901.6714 | 867.2131 | 945.5704 | 936.6209 | 1034.733 | 1075.3   | 0.166563 | 1115.283 | 1354.756 |
| YGR023W   | 213.0386 | 182.9355 | 174.8861 | 184.4588 | 177.4486 | 109.5847 | -0.2759  | 242.8439 | 332.7624 |
| YIL058W   | 0        | 0        | 0        | 0        | 0        | 0        | #DIV/0!  | 2.248555 | 2.634003 |
| YDR101C   | 3888.818 | 4346.943 | 3923.574 | 4658.928 | 4397.037 | 4726.818 | 0.180803 | 3759.584 | 3750.821 |
| YGR092W   | 627.6002 | 709.9874 | 637.2967 | 670.6778 | 710.9466 | 715.2358 | 0.086463 | 892.6763 | 804.249  |
| YJL112W   | 1126.226 | 1130.245 | 1074.018 | 1055.713 | 1139.589 | 1216.194 | 0.034671 | 921.9075 | 798.103  |
| YCL025C   | 2184.509 | 2846.872 | 2426.668 | 1926.072 | 1848.231 | 1636.921 | -0.46284 | 2498.145 | 2329.337 |
| YKR012C   | 5.7578   | 4.944202 | 7.904455 | 2.686293 | 13.82716 | 10.76278 | 0.551841 | 0        | 0        |
| YKR073C   | 9.21248  | 15.82145 | 20.74919 | 11.6406  | 14.97943 | 13.69809 | -0.18339 | 1.124277 | 7.024009 |
| YER177W   | 26233.69 | 19998.31 | 25582.77 | 24982.53 | 23950.95 | 23738.78 | 0.017124 | 20576.53 | 19560.11 |
| YMR155W   | 481.3521 | 481.5653 | 389.2944 | 453.0881 | 475.8848 | 400.1798 | -0.02481 | 310.3006 | 302.9104 |
| YJR078W   | 43.75928 | 77.12955 | 83.98483 | 65.36646 | 53.00412 | 49.90017 | -0.28395 | 104.5578 | 103.6041 |
| YML052W   | 5646.098 | 6685.55  | 5772.228 | 6187.428 | 6117.367 | 5002.737 | -0.0649  | 4517.347 | 4051.097 |
| YLR074C   | 4649.999 | 4841.363 | 4573.715 | 5747.772 | 5710.618 | 4290.436 | 0.163127 | 4213.792 | 4092.363 |
| YCR046C   | 2417.124 | 2189.293 | 2249.805 | 2522.429 | 2243.457 | 1774.881 | -0.06795 | 1975.356 | 1711.224 |
| YJR082C   | 552.7488 | 661.5342 | 657.0578 | 676.0504 | 591.1112 | 646.7453 | 0.032448 | 883.6821 | 800.737  |
| YAL062W   | 389.2273 | 537.9292 | 351.7482 | 385.9308 | 322.6338 | 305.2716 | -0.33508 | 247.341  | 224.7683 |
| YDL219W   | 616.0846 | 530.0185 | 534.5387 | 539.0495 | 574.9795 | 500.9586 | -0.05749 | 845.4567 | 678.6948 |
| YJL028W   | 13.81872 | 7.910723 | 15.80891 | 17.01319 | 8.065844 | 4.892174 | -0.32479 | 2.248555 | 1.756002 |
| YLR049C   | 786.5154 | 743.608  | 699.5442 | 773.6524 | 881.4816 | 869.8285 | 0.179433 | 505.9249 | 532.0687 |
| YCR047C   | 1183.804 | 1518.859 | 1036.472 | 1613.567 | 1427.654 | 1156.51  | 0.166905 | 982.6185 | 930.6811 |
| YBL086C   | 494.0192 | 415.313  | 480.1956 | 424.4343 | 381.3992 | 423.6622 | -0.17653 | 575.6301 | 596.1627 |
| YNL256W   | 1596.062 | 1573.245 | 1704.398 | 1596.554 | 1709.959 | 1611.482 | 0.013051 | 1258.066 | 1326.66  |
| YLR142W   | 359.2867 | 579.4605 | 401.1511 | 314.2963 | 297.284  | 212.3203 | -0.70158 | 214.737  | 185.2582 |
| YDL015C   | 3728.751 | 3658.71  | 3612.336 | 3852.144 | 4068.642 | 3821.766 | 0.094269 | 3309.873 | 3136.22  |
| YGL017W   | 460.624  | 489.476  | 422.8883 | 476.3693 | 410.2058 | 399.2014 | -0.09468 | 577.8786 | 548.7507 |
| YML018C   | 2719.985 | 3822.857 | 2967.135 | 3738.425 | 3566.255 | 3136.862 | 0.134821 | 2269.916 | 2540.057 |
| YCR024C-1 | 5291.418 | 6319.679 | 5828.547 | 5985.061 | 6619.754 | 5503.695 | 0.054297 | 5198.659 | 4681.502 |
| YML080W   | 1285.141 | 1483.261 | 1394.148 | 1596.554 | 1605.103 | 1401.119 | 0.145036 | 1241.202 | 1030.773 |

|           |          |          |          |          |          |          |          |          |          |
|-----------|----------|----------|----------|----------|----------|----------|----------|----------|----------|
| YBL101C   | 624.1455 | 596.2708 | 694.6039 | 603.5205 | 519.6708 | 558.6862 | -0.18729 | 754.3902 | 777.031  |
| YNL245C   | 541.2332 | 547.8176 | 537.5029 | 485.3236 | 528.8889 | 493.1311 | -0.10981 | 366.5145 | 392.4665 |
| YOR198C   | 9407.093 | 7351.04  | 9538.701 | 9631.256 | 9800.001 | 11401.7  | 0.229584 | 13065.23 | 12866.23 |
| YMR292W   | 762.3327 | 707.0209 | 807.2424 | 873.0453 | 875.7202 | 735.7829 | 0.126105 | 675.6908 | 538.2147 |
| YJR130C   | 606.8721 | 537.9292 | 550.3477 | 476.3693 | 472.428  | 577.2765 | -0.15159 | 718.4133 | 657.6228 |
| YGL226W   | 522.8082 | 383.6701 | 364.593  | 371.6039 | 472.428  | 297.4442 | -0.15514 | 270.9509 | 260.7663 |
| YBR186W   | 236.0698 | 222.4891 | 160.0652 | 220.276  | 230.4527 | 160.4633 | -0.01744 | 120.2977 | 112.3841 |
| YDR428C   | 404.1975 | 408.3911 | 527.6223 | 523.8272 | 421.7284 | 453.9937 | 0.062502 | 716.1648 | 641.8188 |
| YML053C   | 609.1752 | 522.1077 | 585.9177 | 616.0565 | 583.0453 | 569.449  | 0.042509 | 742.0231 | 784.933  |
| YJR101W   | 1579.94  | 1502.049 | 1533.464 | 1441.644 | 1439.177 | 1362.96  | -0.12112 | 1333.393 | 1249.396 |
| YGL252C   | 1410.661 | 1527.758 | 1545.321 | 1339.565 | 1571.687 | 1459.825 | -0.03671 | 1861.804 | 1758.636 |
| YDR098C   | 2109.658 | 1992.513 | 1966.233 | 2092.622 | 2053.334 | 1823.802 | -0.02364 | 2724.124 | 2493.523 |
| YPL057C   | 1173.44  | 1272.638 | 1198.513 | 1129.139 | 941.3993 | 961.8013 | -0.26533 | 1238.954 | 1495.236 |
| YJL145W   | 2890.415 | 2484.956 | 2414.811 | 2781.209 | 2604.115 | 2423.583 | 0.003464 | 2108.02  | 2002.72  |
| YNL147W   | 1104.346 | 1028.394 | 1030.543 | 968.8564 | 1107.325 | 1070.408 | -0.00763 | 923.0318 | 833.223  |
| YGL105W   | 10885.7  | 10515.33 | 10470.44 | 11925.35 | 11312.92 | 10342.05 | 0.075351 | 14303.06 | 13429.9  |
| YDR280W   | 1735.401 | 1857.042 | 1840.75  | 2082.773 | 2052.181 | 1739.657 | 0.112693 | 1552.627 | 1386.364 |
| YDL236W   | 2755.683 | 2838.961 | 2587.721 | 2707.783 | 2697.449 | 2537.081 | -0.04296 | 2372.225 | 1972.868 |
| YOR336W   | 1121.619 | 1056.082 | 1131.325 | 1068.249 | 1042.798 | 1216.194 | 0.00792  | 683.5607 | 872.7331 |
| YDL099W   | 1646.731 | 1720.582 | 1951.412 | 1938.608 | 1825.185 | 1776.837 | 0.05897  | 2244.058 | 2184.467 |
| YNL016W   | 4342.533 | 4051.279 | 4541.109 | 4464.619 | 4739.26  | 5513.48  | 0.186248 | 5333.572 | 5945.823 |
| YMR042W   | 765.7874 | 913.6886 | 817.123  | 835.4371 | 815.8025 | 710.3436 | -0.08021 | 620.6012 | 622.5028 |
| YPR179C   | 378.8632 | 365.871  | 371.5094 | 353.6953 | 356.0494 | 442.2525 | 0.045485 | 481.1908 | 524.1666 |
| YBR079C   | 8964.894 | 9153.696 | 9776.822 | 10622.5  | 10313.91 | 11492.69 | 0.217261 | 12473.86 | 12451.81 |
| YPL070W   | 445.6537 | 397.5139 | 524.6582 | 453.9835 | 436.7079 | 524.441  | 0.049053 | 534.0318 | 675.1828 |
| YGL060W   | 382.3179 | 410.3688 | 376.4497 | 393.0942 | 419.4239 | 401.1582 | 0.053941 | 540.7775 | 546.1167 |
| YKR015C   | 85.21544 | 71.19651 | 103.746  | 65.36646 | 42.63375 | 46.96487 | -0.74744 | 116.9249 | 99.21412 |
| YDL233W   | 458.3209 | 461.7885 | 412.0197 | 342.9501 | 368.7243 | 291.5735 | -0.40906 | 550.896  | 542.6047 |
| YNL251C   | 2017.533 | 2146.773 | 2081.836 | 2095.309 | 2297.613 | 2239.637 | 0.0866   | 1573.988 | 1751.612 |
| YMR271C   | 813.0013 | 816.7822 | 793.4096 | 850.6595 | 617.6132 | 536.1822 | -0.2737  | 1372.743 | 1082.575 |
| YPR029C   | 1500.483 | 1283.515 | 1485.049 | 1559.841 | 1376.955 | 1658.447 | 0.106227 | 1738.133 | 1839.412 |
| YJR033C   | 488.2614 | 464.755  | 532.5626 | 489.8008 | 521.9754 | 565.5353 | 0.086442 | 589.1214 | 705.9129 |
| YGR080W   | 1411.812 | 1475.35  | 1409.957 | 1550.887 | 1394.239 | 1361.981 | 0.003349 | 1744.879 | 1691.03  |
| YBL050W   | 1893.165 | 1809.578 | 1830.869 | 1563.423 | 1630.453 | 1672.145 | -0.18548 | 2223.821 | 2029.938 |
| YMR273C   | 658.6923 | 615.0587 | 581.9655 | 631.2789 | 504.6914 | 688.818  | -0.02425 | 802.7341 | 886.7811 |
| YBL051C   | 1249.443 | 1265.716 | 1608.557 | 1443.435 | 1534.815 | 1835.544 | 0.22323  | 1645.942 | 2194.125 |
| YJL129C   | 1511.998 | 1449.64  | 1550.261 | 1618.939 | 1632.757 | 1948.064 | 0.20471  | 1174.87  | 1404.802 |
| YGL179C   | 168.1278 | 193.8127 | 198.5994 | 150.4324 | 135.9671 | 134.0456 | -0.4149  | 267.578  | 281.8383 |
| YCL014W   | 733.5437 | 689.2218 | 770.6843 | 768.2798 | 757.0371 | 998.9818 | 0.202681 | 979.2457 | 1102.769 |
| YGL169W   | 1163.076 | 1312.191 | 1214.322 | 1284.944 | 1353.91  | 1276.857 | 0.085814 | 1106.289 | 1119.451 |
| YOL082W   | 1004.16  | 985.8739 | 977.1882 | 733.358  | 633.7449 | 838.5186 | -0.42793 | 1133.272 | 1168.619 |
| YCR076C   | 679.4204 | 660.5454 | 575.0491 | 680.5276 | 596.8725 | 509.7645 | -0.09968 | 953.3873 | 789.323  |
| YOL122C   | 1459.026 | 1863.964 | 1474.181 | 1721.018 | 1718.025 | 1521.466 | 0.048304 | 1170.373 | 1193.203 |
| YOL142W   | 1556.909 | 1538.636 | 1493.942 | 1571.481 | 1744.527 | 1366.873 | 0.029064 | 1301.913 | 1136.133 |
| YJR006W   | 918.9448 | 876.1126 | 859.6094 | 880.2087 | 896.461  | 804.2733 | -0.04063 | 998.3584 | 1086.965 |
| YOL105C   | 413.41   | 378.7259 | 349.7721 | 419.9572 | 435.5556 | 377.6758 | 0.110947 | 536.2804 | 507.4846 |
| YGL071W   | 715.1187 | 585.3935 | 659.0339 | 737.8352 | 776.6256 | 847.3245 | 0.269358 | 829.7168 | 1093.111 |
| YPR074C   | 17102.97 | 17875.27 | 17691.16 | 18711.82 | 19263.54 | 20097.05 | 0.140888 | 20573.15 | 21664.68 |
| YGR155W   | 14127.34 | 16931.91 | 14867.29 | 17166.31 | 17100.74 | 15678.44 | 0.121026 | 11897.1  | 12142.75 |
| YHR022C-1 | 2.30312  | 2.966521 | 5.928341 | 5.372586 | 8.065844 | 10.76278 | 1.111841 | 34.8526  | 10.53601 |
| YDL100C   | 4117.978 | 3522.25  | 4088.579 | 3783.196 | 4009.877 | 4201.399 | 0.032313 | 5044.633 | 4906.27  |
| YMR297W   | 10678.42 | 11384.52 | 10609.75 | 11211.69 | 10805.93 | 10947.71 | 0.012864 | 10286.01 | 9558.798 |
| YOL146W   | 597.6596 | 546.8288 | 572.0849 | 533.6769 | 472.428  | 487.2605 | -0.20096 | 423.8526 | 439.0005 |
| YOR358W   | 826.82   | 1045.204 | 870.4781 | 832.7509 | 747.819  | 682.9474 | -0.27693 | 609.3584 | 629.5268 |

|         |          |          |          |          |          |          |          |          |          |
|---------|----------|----------|----------|----------|----------|----------|----------|----------|----------|
| YOR018W | 532.0207 | 620.9918 | 580.9774 | 462.0424 | 569.2182 | 629.1335 | -0.06257 | 332.7861 | 400.3685 |
| YPL016W | 470.988  | 402.4581 | 517.7418 | 440.5521 | 555.391  | 679.0337 | 0.267824 | 644.211  | 785.811  |
| YNL124W | 2358.395 | 2863.682 | 2390.109 | 2719.424 | 2612.181 | 2488.159 | 0.038814 | 2072.043 | 2123.885 |
| YDR297W | 3255.46  | 2953.666 | 3086.69  | 2855.53  | 2748.148 | 2766.035 | -0.1514  | 2392.462 | 2329.337 |
| YGL082W | 1541.939 | 1492.16  | 1649.067 | 1475.67  | 1586.667 | 1439.277 | -0.05704 | 1928.136 | 1829.754 |
| YOR311C | 1469.39  | 1599.944 | 1511.727 | 1628.789 | 1544.033 | 1353.175 | -0.01745 | 1231.084 | 1234.47  |
| YMR121C | 1647.882 | 1618.732 | 1379.327 | 1590.286 | 1530.206 | 1367.852 | -0.04979 | 1377.24  | 1108.915 |
| YDL052C | 2372.213 | 2720.3   | 2329.838 | 2416.768 | 2538.436 | 2009.705 | -0.09177 | 1940.503 | 1777.952 |
| YKL175W | 2369.91  | 2429.581 | 2293.28  | 2191.12  | 2379.424 | 2289.537 | -0.04812 | 1898.905 | 1817.462 |
| YNL237W | 271.7681 | 351.0384 | 326.0588 | 291.0151 | 324.9383 | 242.6518 | -0.14421 | 187.7543 | 176.4782 |
| YBL089W | 434.1381 | 565.6167 | 541.4551 | 534.5723 | 564.6091 | 426.5975 | -0.01452 | 319.2948 | 377.5405 |
| YJR094W | 10426.22 | 8385.367 | 9300.579 | 10157.77 | 10362.31 | 9556.372 | 0.097439 | 9521.506 | 7916.936 |
| YJL147C | 300.5571 | 230.3998 | 260.847  | 188.9359 | 202.7984 | 211.3419 | -0.3928  | 116.9249 | 174.7222 |
| YAR007C | 1569.576 | 1366.577 | 1487.026 | 1412.99  | 1391.934 | 1816.953 | 0.063395 | 1679.671 | 1927.212 |
| YAL028W | 204.9777 | 144.3707 | 219.3486 | 140.5827 | 124.4445 | 138.9377 | -0.49343 | 237.2225 | 262.5223 |
| YMR268C | 400.7429 | 393.5585 | 382.378  | 428.016  | 468.9712 | 442.2525 | 0.186693 | 251.8382 | 287.9844 |
| YEL045C | 5.7578   | 5.933043 | 5.928341 | 5.372586 | 4.609054 | 9.784347 | 0.165873 | 11.24277 | 29.85204 |
| YBR061C | 1523.514 | 1636.531 | 1501.846 | 1874.137 | 1775.638 | 1654.533 | 0.186249 | 1421.087 | 1313.49  |
| YIL033C | 3659.657 | 4054.246 | 3937.406 | 3846.772 | 3675.72  | 3945.049 | -0.02294 | 4875.991 | 4918.562 |
| YBR028C | 978.8259 | 1006.64  | 896.1675 | 934.83   | 926.4198 | 1015.615 | -0.00239 | 733.0289 | 701.5229 |
| YGR250C | 800.3342 | 770.3067 | 755.8635 | 710.9722 | 738.6009 | 868.85   | -0.00502 | 1161.379 | 1271.346 |
| YJR152W | 317.8305 | 349.0607 | 230.2172 | 235.4984 | 241.9753 | 218.1909 | -0.36689 | 152.9017 | 189.6482 |
| YMR150C | 502.0801 | 437.0675 | 509.8373 | 436.9703 | 420.5762 | 438.3388 | -0.1611  | 365.3902 | 295.8864 |
| YPR025C | 659.8438 | 642.7463 | 684.7234 | 673.3641 | 712.0988 | 609.5648 | 0.005589 | 831.9653 | 814.785  |
| YAL036C | 2510.401 | 3057.495 | 2665.777 | 3093.714 | 3084.609 | 2813.978 | 0.127154 | 2249.679 | 2332.849 |
| YDR140W | 918.9448 | 817.771  | 838.8602 | 860.5092 | 888.3951 | 823.842  | -0.00159 | 710.5434 | 622.5028 |
| YNL112W | 9582.13  | 10899.99 | 10471.43 | 13231.78 | 13399.67 | 13788.1  | 0.384949 | 10323.12 | 10401.68 |
| YKL103C | 2543.796 | 2401.893 | 2935.517 | 2500.043 | 2316.05  | 2776.798 | -0.05377 | 3343.601 | 3432.984 |
| YBL085W | 1697.399 | 1349.767 | 1851.618 | 1650.279 | 1777.943 | 2191.694 | 0.198124 | 1924.763 | 2605.029 |
| YLR294C | 650.6314 | 547.8176 | 547.3835 | 574.8667 | 500.0823 | 468.6702 | -0.1776  | 472.1965 | 446.0245 |
| YLL011W | 1450.966 | 1625.654 | 1448.491 | 1743.404 | 1607.408 | 1542.013 | 0.112715 | 1182.74  | 1324.904 |
| YHR147C | 1486.664 | 1378.444 | 1399.088 | 1240.172 | 1116.543 | 1071.386 | -0.31486 | 1134.396 | 991.2632 |
| YDR124W | 148.5512 | 165.1364 | 182.7905 | 140.5827 | 179.7531 | 153.6143 | -0.067   | 174.263  | 198.4282 |
| YBR011C | 26066.71 | 21985.88 | 24256.8  | 25017.45 | 24301.24 | 24951.06 | 0.038592 | 32587.18 | 28752.78 |
| YPL119C | 79.45764 | 111.739  | 114.6146 | 98.49741 | 102.5514 | 107.6278 | 0.013455 | 151.7775 | 180.8682 |
| YOR287C | 1247.139 | 1100.579 | 1226.179 | 1370.009 | 1436.873 | 1255.332 | 0.184768 | 1046.702 | 908.7311 |
| YGL054C | 3037.815 | 2986.298 | 3053.096 | 3175.198 | 3369.218 | 2866.814 | 0.052135 | 2811.818 | 2446.989 |
| YBR259W | 226.8573 | 271.9311 | 298.3932 | 266.8384 | 262.7161 | 266.1342 | -0.0027  | 332.7861 | 380.1745 |
| YIL161W | 549.2941 | 577.4828 | 579.9894 | 590.089  | 550.7819 | 523.4626 | -0.03632 | 430.5983 | 470.6086 |
| YMR219W | 886.7012 | 775.2509 | 793.4096 | 826.4828 | 818.1071 | 956.9092 | 0.083408 | 915.1619 | 1304.71  |
| YLR354C | 13118.57 | 11884.87 | 12783.48 | 13600.7  | 13015.97 | 13240.18 | 0.076941 | 10682.88 | 9575.48  |
| YOR095C | 3466.195 | 3713.096 | 3273.432 | 3664.104 | 3831.276 | 3225.899 | 0.036598 | 3164.841 | 2833.309 |
| YPL021W | 6.90936  | 17.79913 | 7.904455 | 12.53603 | 4.609054 | 4.892174 | -0.5655  | 3.372832 | 0        |
| YGR255C | 1229.866 | 1369.544 | 1312.139 | 1096.903 | 1205.268 | 1118.351 | -0.19352 | 993.8613 | 952.6312 |
| YLL007C | 199.2199 | 173.0471 | 214.4083 | 221.1715 | 214.321  | 196.6654 | 0.107723 | 249.5896 | 288.8624 |
| YGR122W | 375.4085 | 453.8778 | 482.1717 | 376.081  | 312.2634 | 364.9561 | -0.31625 | 521.6648 | 599.6747 |
| YLL018C | 8508.876 | 8338.891 | 8393.543 | 9483.51  | 9299.918 | 10333.25 | 0.206059 | 10633.42 | 10874.04 |
| YGL068W | 443.3506 | 390.592  | 405.1033 | 389.5125 | 410.2058 | 405.072  | -0.04045 | 391.2486 | 326.6164 |
| YER127W | 2444.762 | 2643.17  | 2372.324 | 3069.538 | 2839.177 | 2737.66  | 0.21287  | 2210.33  | 2288.949 |
| YML113W | 1874.74  | 2157.65  | 1868.415 | 2219.774 | 2042.963 | 1602.676 | -0.00868 | 1292.919 | 1460.994 |
| YGR009C | 1232.169 | 1261.76  | 1361.542 | 1306.434 | 1303.21  | 1547.884 | 0.108818 | 1611.09  | 1688.396 |
| YPL066W | 443.3506 | 513.2082 | 556.276  | 437.8658 | 463.2099 | 543.0313 | -0.06708 | 591.37   | 628.6488 |
| YOR241W | 1303.566 | 1314.169 | 1380.315 | 1447.017 | 1429.959 | 1387.42  | 0.093045 | 1667.304 | 1540.892 |
| YHR197W | 1936.924 | 2066.677 | 2044.29  | 2503.625 | 2230.782 | 2502.836 | 0.259008 | 2004.587 | 1889.458 |

|           |          |          |          |          |          |          |          |          |          |
|-----------|----------|----------|----------|----------|----------|----------|----------|----------|----------|
| YFL019C   | 18.42496 | 13.84377 | 13.8328  | 13.43147 | 4.609054 | 11.74122 | -0.63039 | 21.36127 | 36.87605 |
| YML027W   | 662.147  | 780.1951 | 775.6246 | 901.699  | 857.284  | 903.0952 | 0.263315 | 878.0607 | 976.3372 |
| YJL073W   | 665.6016 | 707.0209 | 684.7234 | 762.0118 | 887.2429 | 826.7773 | 0.267246 | 873.5636 | 976.3372 |
| YDR032C   | 6284.063 | 6132.788 | 6055.8   | 6179.37  | 5745.186 | 4971.427 | -0.12871 | 5397.656 | 4478.683 |
| YPR175W   | 504.3833 | 487.4983 | 518.7298 | 469.2059 | 496.6256 | 569.449  | 0.02337  | 630.7197 | 588.2607 |
| YNL321W   | 1264.413 | 1359.656 | 1453.432 | 1302.852 | 1291.687 | 1698.563 | 0.074336 | 1697.659 | 1862.24  |
| YBL011W   | 1779.16  | 1756.181 | 1739.968 | 1744.3   | 1806.749 | 1758.247 | 0.009265 | 2099.026 | 2184.467 |
| YOR159C   | 1106.649 | 1000.707 | 1092.791 | 1157.792 | 1124.609 | 1003.874 | 0.038315 | 872.4393 | 835.857  |
| YLR034C   | 1302.414 | 1523.803 | 1358.578 | 1341.356 | 1375.803 | 1229.892 | -0.08438 | 1621.208 | 1607.62  |
| YKR001C   | 2987.146 | 2766.776 | 3050.131 | 3114.309 | 3152.593 | 3602.597 | 0.164809 | 3831.538 | 3721.847 |
| YDR237W   | 1901.225 | 1817.489 | 1915.842 | 1809.666 | 1768.724 | 1634.964 | -0.11209 | 1722.393 | 1482.944 |
| YOR229W   | 838.3356 | 1052.126 | 837.8722 | 868.5681 | 902.2223 | 849.2813 | -0.05841 | 629.5954 | 643.5748 |
| YFR029W   | 437.5928 | 426.1902 | 452.53   | 405.6303 | 467.819  | 420.7269 | -0.02447 | 550.896  | 565.4327 |
| YDL193W   | 665.6016 | 606.1592 | 599.7505 | 677.8413 | 686.749  | 666.314  | 0.117919 | 881.4335 | 718.2049 |
| YNL243W   | 2805.2   | 3005.086 | 3020.49  | 2844.784 | 2839.177 | 3030.212 | -0.01918 | 3300.879 | 3278.456 |
| YAL025C   | 5344.39  | 5456.422 | 5034.15  | 6519.633 | 6085.103 | 5780.592 | 0.215442 | 4996.289 | 4855.346 |
| YHR207C   | 684.0266 | 610.1145 | 610.6191 | 646.5012 | 662.5515 | 713.2789 | 0.08641  | 914.0376 | 782.299  |
| YOR102W   | 8.06092  | 3.955362 | 7.904455 | 2.686293 | 10.37037 | 2.935304 | -0.31692 | 1.124277 | 0        |
| YOR337W   | 784.2123 | 821.7264 | 815.1469 | 707.3905 | 731.6873 | 898.2031 | -0.05082 | 1012.974 | 975.4592 |
| YHL049C   | 9.21248  | 0        | 1.976114 | 1.790862 | 2.304527 | 1.956869 | -0.88648 | 6.745665 | 7.90201  |
| YKR023W   | 601.1143 | 514.197  | 584.9296 | 522.9317 | 450.535  | 633.0473 | -0.08181 | 685.8093 | 748.9349 |
| YGR005C   | 1423.328 | 1511.937 | 1636.222 | 1507.906 | 1557.86  | 1620.288 | 0.03571  | 1962.988 | 1821.852 |
| YBR062C   | 523.9598 | 425.2014 | 461.4225 | 526.5134 | 480.4939 | 371.8052 | -0.03287 | 666.6965 | 575.9687 |
| YLR314C   | 2440.156 | 2378.161 | 2321.934 | 2440.05  | 2472.757 | 2468.591 | 0.047919 | 2636.431 | 2991.35  |
| YER155C   | 2107.355 | 1796.723 | 2498.796 | 2342.448 | 2665.185 | 3509.645 | 0.411673 | 3094.012 | 3646.338 |
| YBR238C   | 1478.603 | 1347.79  | 1816.048 | 1849.065 | 1827.49  | 2556.65  | 0.425091 | 2068.671 | 2506.693 |
| YHR214C-I | 0        | 0        | 0        | 0        | 0        | 0        | #DIV/0!  | 4.49711  | 0.878001 |
| YDR399W   | 5550.519 | 5377.314 | 5250.534 | 6320.848 | 5667.984 | 5016.435 | 0.071916 | 5260.494 | 4496.244 |
| YGL240W   | 47.21396 | 67.24115 | 74.10426 | 40.2944  | 35.72017 | 51.85704 | -0.56032 | 75.32659 | 86.04411 |
| YBR255C-I | 313.2243 | 298.6298 | 282.5843 | 276.6882 | 239.6708 | 200.5791 | -0.31913 | 213.6127 | 158.9182 |
| YDR183C-I | 36.84992 | 56.3639  | 42.48644 | 50.14414 | 78.35392 | 35.22365 | 0.270822 | 15.73988 | 26.34003 |
| YBR269C   | 777.303  | 637.8021 | 637.2967 | 587.4028 | 482.7984 | 381.5895 | -0.49948 | 456.4567 | 403.8805 |
| YOL096C   | 543.5363 | 514.197  | 472.2912 | 465.6241 | 421.7284 | 381.5895 | -0.26993 | 712.7919 | 631.2828 |
| YMR199W   | 795.7279 | 690.2106 | 904.072  | 719.0311 | 861.8931 | 1004.852 | 0.113581 | 907.2919 | 1048.333 |
| YPR043W   | 96.73103 | 192.8239 | 134.3757 | 123.5695 | 106.0082 | 113.4984 | -0.3053  | 74.20231 | 66.72808 |
| YLL049W   | 498.6255 | 443.0005 | 407.0794 | 431.5978 | 457.4486 | 437.3603 | -0.02405 | 477.8179 | 307.3004 |
| YPL096C-I | 168.1278 | 206.6677 | 148.2085 | 147.7461 | 148.642  | 178.0751 | -0.14053 | 104.5578 | 102.7261 |
| YIL006W   | 154.309  | 171.0694 | 201.5636 | 176.3999 | 125.5967 | 161.4417 | -0.18527 | 237.2225 | 263.4003 |
| YML062C   | 749.6655 | 767.3402 | 768.7082 | 873.0453 | 807.7367 | 727.9554 | 0.075632 | 997.2341 | 1026.383 |
| YJL052W   | 33477    | 33094.51 | 31617.82 | 33560.75 | 31339.26 | 28888.28 | -0.06616 | 63274.34 | 53099.75 |
| YIL114C   | 672.511  | 797.9942 | 699.5442 | 610.684  | 757.0371 | 585.104  | -0.15217 | 939.896  | 842.881  |
| YGR036C   | 494.0192 | 616.0476 | 426.8405 | 422.6434 | 506.9959 | 388.4386 | -0.22159 | 269.8266 | 318.7144 |
| YGR147C   | 1780.312 | 1794.745 | 1800.24  | 1781.908 | 1522.14  | 1444.17  | -0.17896 | 1378.364 | 1381.974 |
| YDR096W   | 461.7755 | 446.9559 | 506.8732 | 385.9308 | 434.4033 | 515.6351 | -0.08353 | 594.7428 | 670.7928 |
| YMR246W   | 11095.28 | 12894.48 | 12356.64 | 13687.56 | 13658.93 | 14474.96 | 0.202431 | 8436.578 | 9418.318 |
| YNL183C   | 751.9686 | 909.7332 | 953.4748 | 843.496  | 770.8643 | 979.4131 | -0.01186 | 998.3584 | 1144.035 |
| YGR152C   | 673.6626 | 635.8244 | 669.9025 | 641.1286 | 614.1564 | 644.7885 | -0.059   | 711.6676 | 810.395  |
| YFR012W   | 8.06092  | 22.74333 | 7.904455 | 15.22233 | 9.218108 | 13.69809 | -0.02141 | 26.98266 | 33.36404 |
| YOR225W   | 8.06092  | 4.944202 | 5.928341 | 16.11776 | 13.82716 | 13.69809 | 1.204812 | 2.248555 | 1.756002 |
| YDR223W   | 259.101  | 273.9088 | 168.9577 | 214.008  | 218.9301 | 224.0615 | -0.09551 | 143.9075 | 99.21412 |
| YFL025C   | 520.5051 | 492.4425 | 478.2195 | 474.5784 | 489.712  | 617.3923 | 0.085018 | 632.9682 | 717.3269 |
| YNR009W   | 1111.255 | 1165.843 | 1232.107 | 1098.694 | 1134.98  | 1082.149 | -0.08178 | 776.8757 | 900.8291 |
| YKL171W   | 204.9777 | 217.5449 | 266.7753 | 216.6943 | 258.107  | 275.9186 | 0.123147 | 288.9393 | 396.8565 |
| YBR292C   | 28.789   | 28.67637 | 15.80891 | 16.11776 | 21.89301 | 24.46087 | -0.23011 | 4.49711  | 8.780011 |

|                   |          |          |          |          |          |          |          |          |          |
|-------------------|----------|----------|----------|----------|----------|----------|----------|----------|----------|
| YNL207W           | 1818.313 | 2169.516 | 1784.431 | 2154.407 | 2145.515 | 2076.238 | 0.143552 | 1771.861 | 1600.596 |
| YPL053C           | 2199.479 | 2144.795 | 2165.821 | 2293.199 | 2464.692 | 2581.111 | 0.172905 | 2663.413 | 2731.461 |
| YLR266C           | 408.8038 | 370.8152 | 389.2944 | 301.7603 | 284.6091 | 322.8835 | -0.36241 | 514.9191 | 466.2186 |
| YBR233W- <i>f</i> | 709.3609 | 618.0253 | 505.8851 | 629.488  | 640.6585 | 619.3492 | 0.043581 | 491.3093 | 462.7066 |
| YKL007W           | 1675.52  | 1659.274 | 1562.118 | 1462.239 | 1466.831 | 1648.662 | -0.09724 | 2106.896 | 1848.192 |
| YJL139C           | 667.9048 | 683.2887 | 617.5355 | 678.7367 | 700.5762 | 636.961  | 0.034427 | 536.2804 | 485.5346 |
| YLR164W           | 190.0074 | 263.0316 | 242.0739 | 148.6416 | 195.8848 | 112.52   | -0.60491 | 101.185  | 76.38609 |
| YPR154W           | 1444.056 | 1775.957 | 1434.659 | 1289.421 | 1206.42  | 946.1464 | -0.43544 | 1966.361 | 2061.547 |
| YOR094W           | 887.8527 | 934.4542 | 965.3315 | 947.366  | 1025.514 | 926.5777 | 0.05674  | 827.4682 | 724.3509 |
| YEL004W           | 248.7369 | 251.1655 | 257.8828 | 271.3156 | 309.9589 | 248.5224 | 0.130969 | 142.7832 | 184.3802 |
| YCR059C           | 1467.087 | 1667.185 | 1420.826 | 1693.26  | 1473.745 | 1202.496 | -0.06001 | 2041.688 | 2012.378 |
| YDL170W           | 506.6864 | 565.6167 | 523.6701 | 450.4018 | 485.1029 | 487.2605 | -0.16574 | 564.3873 | 543.4827 |
| YOR090C           | 1151.56  | 1098.602 | 1073.03  | 1103.171 | 1113.087 | 1111.502 | 0.001982 | 1345.76  | 1352.122 |
| YJL159W           | 19060.62 | 22637.52 | 20135.61 | 21296.04 | 21230.45 | 20245.77 | 0.021733 | 25973.06 | 24734.17 |
| YML112W           | 587.2956 | 609.1257 | 549.3596 | 578.4484 | 596.8725 | 590.9746 | 0.016854 | 693.6792 | 745.4229 |
| YGL118C           | 33.39524 | 9.888404 | 10.86863 | 8.95431  | 8.065844 | 10.76278 | -0.96282 | 6.745665 | 3.512004 |
| YLR328W           | 846.3966 | 930.4988 | 1004.854 | 970.6472 | 1007.078 | 853.1951 | 0.025279 | 1318.777 | 1090.477 |
| YDR195W           | 978.8259 | 892.9229 | 1015.722 | 1176.596 | 1208.724 | 1266.095 | 0.338649 | 789.2428 | 857.807  |
| YBR185C           | 779.6061 | 810.8492 | 791.4335 | 750.3712 | 707.4898 | 647.7238 | -0.17789 | 720.6619 | 705.0349 |
| YHL046W- <i>f</i> | 0        | 0        | 0        | 0        | 0        | 0        | #DIV/0!  | 4.49711  | 1.756002 |
| YOR306C           | 773.8483 | 940.3873 | 779.5768 | 790.6656 | 813.498  | 864.9363 | -0.01437 | 531.7832 | 688.3528 |
| YKL138C           | 830.2747 | 594.2931 | 718.3173 | 710.9722 | 659.0947 | 610.5433 | -0.11361 | 593.6185 | 510.9966 |
| YNL320W           | 526.2629 | 570.5609 | 575.0491 | 548.8992 | 600.3293 | 449.1015 | -0.0649  | 391.2486 | 386.3205 |
| YMR118C           | 131.2778 | 184.9132 | 150.1846 | 142.3735 | 139.4239 | 115.4553 | -0.23144 | 236.0983 | 215.9883 |
| YLR351C           | 2805.2   | 2693.601 | 2901.923 | 3002.38  | 2771.194 | 2824.741 | 0.03354  | 2548.737 | 2173.931 |
| YBR022W           | 500.9286 | 481.5653 | 459.4464 | 558.749  | 498.9301 | 442.2525 | 0.056885 | 408.1127 | 342.4204 |
| YGR294W           | 0        | 2.966521 | 0        | 0        | 0        | 0        | #NUM!    | 8.99422  | 2.634003 |
| YNR007C           | 384.621  | 364.8821 | 340.8796 | 301.7603 | 303.0453 | 227.9753 | -0.38883 | 420.4798 | 459.1946 |
| YIL045W           | 233.7667 | 205.6788 | 248.9903 | 136.1055 | 139.4239 | 197.6438 | -0.54095 | 296.8093 | 283.5943 |
| YLR353W           | 938.5214 | 860.2912 | 985.0927 | 868.5681 | 1054.321 | 1233.806 | 0.181305 | 654.3295 | 705.0349 |
| YLR008C           | 2262.815 | 2188.304 | 2085.788 | 2253.8   | 2097.12  | 1883.487 | -0.06836 | 1993.344 | 1716.492 |
| YKL052C           | 891.3074 | 1096.624 | 987.0688 | 831.8554 | 791.605  | 629.1335 | -0.4013  | 550.896  | 641.8188 |
| YKL191W           | 2667.013 | 3148.468 | 2944.409 | 3210.12  | 3327.737 | 3041.954 | 0.129084 | 2472.286 | 2636.637 |
| YOR374W           | 9670.8   | 11408.25 | 9661.22  | 5076.198 | 4990.453 | 4396.107 | -1.08779 | 9297.775 | 9811.662 |
| YBR222C           | 1518.908 | 1514.904 | 1462.324 | 1474.775 | 1402.305 | 1291.534 | -0.10912 | 1639.197 | 1655.91  |
| YAR033W           | 9.21248  | 29.66521 | 22.72531 | 24.17664 | 26.50206 | 14.67652 | 0.085302 | 46.09538 | 37.75405 |
| YJL024C           | 1014.524 | 1114.423 | 1119.468 | 1052.131 | 1098.107 | 1030.292 | -0.03047 | 874.6879 | 808.639  |
| YPL215W           | 1039.859 | 1090.691 | 1078.958 | 1093.321 | 1003.621 | 984.3053 | -0.05884 | 854.4509 | 836.735  |
| YFLO40W           | 49.51708 | 83.0626  | 71.14009 | 44.77155 | 58.76544 | 54.79234 | -0.36366 | 17.98844 | 35.12004 |
| YOR301W           | 632.2064 | 700.099  | 665.9503 | 659.0372 | 694.8149 | 635.0041 | -0.0068  | 731.9046 | 820.931  |
| YDR273W           | 133.581  | 147.3372 | 147.2205 | 156.7004 | 107.1605 | 95.8866  | -0.25109 | 94.43931 | 41.26605 |
| YML006C           | 808.3951 | 826.6706 | 853.6811 | 847.9732 | 810.0412 | 833.6264 | 0.001677 | 620.6012 | 673.4268 |
| YBR003W           | 1355.386 | 1353.723 | 1482.085 | 1293.002 | 1328.56  | 1295.448 | -0.09761 | 1158.006 | 1119.451 |
| YBR110W           | 671.3594 | 728.7754 | 585.9177 | 627.6971 | 686.749  | 560.6431 | -0.08294 | 804.9827 | 819.175  |
| YGL224C           | 892.459  | 780.1951 | 812.1827 | 688.5865 | 825.0206 | 783.7262 | -0.11319 | 650.9567 | 525.9226 |
| YPR055W           | 599.9627 | 616.0476 | 685.7114 | 589.1936 | 610.6996 | 809.1655 | 0.079214 | 803.8584 | 886.7811 |
| YDR320C- <i>f</i> | 423.7741 | 397.5139 | 373.4855 | 351.9044 | 444.7737 | 342.4522 | -0.0688  | 362.0173 | 277.4483 |
| YFR002W           | 1567.273 | 1670.151 | 1577.927 | 1681.619 | 1783.704 | 1879.573 | 0.150521 | 1971.983 | 2010.622 |
| YDR157W           | 11.5156  | 24.72101 | 13.8328  | 22.38578 | 18.43622 | 13.69809 | 0.122858 | 13.49133 | 8.780011 |
| YDR202C           | 416.8647 | 431.1344 | 398.1869 | 446.8201 | 406.749  | 363.9777 | -0.03354 | 610.4827 | 490.8026 |
| YHR072W- <i>f</i> | 4028.157 | 3453.031 | 3401.88  | 3880.798 | 3869.301 | 3587.92  | 0.059083 | 3840.532 | 2929.89  |
| YLR375W           | 2098.142 | 2362.34  | 1972.161 | 2044.269 | 1806.749 | 1619.309 | -0.23378 | 1611.09  | 1512.796 |
| YNL298W           | 1013.373 | 1231.106 | 1177.764 | 1191.819 | 1140.741 | 1349.261 | 0.105477 | 1280.552 | 1438.166 |
| YJL046W           | 411.1069 | 399.4915 | 442.6495 | 458.4607 | 382.5515 | 372.7836 | -0.04615 | 320.4191 | 277.4483 |

|           |          |          |          |          |          |          |          |          |          |
|-----------|----------|----------|----------|----------|----------|----------|----------|----------|----------|
| YLL032C   | 476.7458 | 373.7817 | 418.9361 | 418.1663 | 426.3375 | 489.2174 | 0.071238 | 534.0318 | 600.5527 |
| YOL157C   | 52.97176 | 15.82145 | 19.76114 | 26.86293 | 23.04527 | 39.13739 | 0.007981 | 62.95954 | 105.3601 |
| YPL230W   | 230.312  | 257.0985 | 231.2053 | 123.5695 | 159.0124 | 144.8083 | -0.74967 | 98.93642 | 120.2861 |
| YMR098C   | 748.514  | 783.1616 | 840.8364 | 717.2403 | 807.7367 | 836.5617 | -0.00669 | 638.5896 | 553.1407 |
| YPR027C   | 452.5631 | 435.0898 | 361.6288 | 327.7278 | 335.3087 | 239.7165 | -0.4687  | 246.2168 | 282.7163 |
| YDR023W   | 8320.021 | 8115.413 | 8429.113 | 8974.01  | 9251.523 | 9707.051 | 0.167859 | 10676.14 | 10671.23 |
| YBL056W   | 2907.689 | 3023.874 | 3101.51  | 2782.104 | 2892.181 | 2681.89  | -0.11237 | 3536.977 | 3651.606 |
| YOR371C   | 138.1872 | 187.8797 | 200.5755 | 187.1451 | 148.642  | 234.8243 | 0.115685 | 216.9856 | 333.6404 |
| YBR205W   | 1117.013 | 1156.943 | 1283.486 | 1367.323 | 1282.469 | 1257.289 | 0.135251 | 1558.249 | 1543.526 |
| YCR089W   | 431.835  | 424.2125 | 474.2673 | 474.5784 | 483.9507 | 543.0313 | 0.174695 | 322.6676 | 360.8584 |
| YGR050C   | 201.523  | 193.8127 | 176.8622 | 222.0669 | 243.1276 | 169.2692 | 0.149023 | 110.1792 | 118.5301 |
| YOR315W   | 1297.808 | 1393.276 | 1321.032 | 1646.698 | 1716.873 | 1683.886 | 0.331193 | 1514.402 | 1735.808 |
| YDR181C   | 703.6031 | 670.4338 | 794.3977 | 826.4828 | 822.7161 | 813.0792 | 0.18334  | 603.737  | 553.1407 |
| YCR068W   | 161.2184 | 279.8418 | 318.1543 | 209.5309 | 222.3868 | 323.8619 | -0.00654 | 348.526  | 427.5865 |
| YLR026C   | 1187.258 | 1213.307 | 1221.238 | 1321.656 | 1147.654 | 1136.941 | -0.00621 | 1533.514 | 1367.926 |
| YER008C   | 1134.287 | 1062.015 | 1164.919 | 1099.589 | 1320.494 | 1631.051 | 0.269341 | 1419.962 | 1693.664 |
| YDR052C   | 974.2197 | 1009.606 | 1077.97  | 1019.896 | 912.5927 | 1092.912 | -0.01725 | 1210.847 | 1370.56  |
| YNL143C   | 125.52   | 104.8171 | 106.7101 | 137.0009 | 86.41976 | 74.36104 | -0.1787  | 73.07804 | 61.46008 |
| YKL084W   | 178.4918 | 159.2033 | 163.0294 | 162.9684 | 207.4074 | 196.6654 | 0.179437 | 286.6908 | 257.2543 |
| YNL215W   | 1050.223 | 988.8404 | 1029.555 | 1208.832 | 1175.309 | 1098.782 | 0.182709 | 1404.223 | 1363.536 |
| YPL257W   | 9.21248  | 25.70985 | 18.77308 | 19.69948 | 20.74074 | 17.61182 | 0.112548 | 25.85838 | 37.75405 |
| YGR238C   | 527.4145 | 554.7395 | 473.2792 | 518.4546 | 496.6256 | 495.088  | -0.04261 | 685.8093 | 613.7228 |
| YLR004C   | 160.0668 | 197.7681 | 156.113  | 139.6872 | 110.6173 | 135.024  | -0.41553 | 113.552  | 86.92211 |
| YBR196C-F | 40.3046  | 35.59826 | 43.4745  | 34.92181 | 51.85186 | 51.85704 | 0.215718 | 73.07804 | 74.63009 |
| YAR027W   | 880.9434 | 859.3023 | 788.4693 | 770.0707 | 759.3416 | 638.9179 | -0.22182 | 654.3295 | 539.0927 |
| YHR200W   | 3610.14  | 3310.638 | 3326.787 | 3435.769 | 3389.959 | 3025.32  | -0.05693 | 4090.121 | 3998.417 |
| YJR072C   | 2701.56  | 2690.635 | 2709.252 | 3001.485 | 3005.103 | 2773.862 | 0.116115 | 3629.168 | 3172.218 |
| YIL009C-F | 494.0192 | 441.0228 | 403.1272 | 343.8455 | 377.9424 | 375.7189 | -0.28603 | 607.1098 | 521.5326 |
| YBR268W   | 233.7667 | 185.902  | 191.683  | 182.6679 | 214.321  | 231.889  | 0.040778 | 179.8844 | 146.6262 |
| YBL039C   | 4701.819 | 5162.736 | 4782.195 | 5559.731 | 5681.811 | 5771.786 | 0.216085 | 4463.382 | 4449.709 |
| YBR262C   | 842.9419 | 789.0947 | 708.4367 | 658.1418 | 731.6873 | 502.9154 | -0.30632 | 592.4942 | 521.5326 |
| YGR012W   | 889.0043 | 806.8938 | 820.0872 | 843.496  | 829.6297 | 732.8476 | -0.0645  | 1075.934 | 952.6312 |
| YGR236C   | 31.09212 | 47.46434 | 29.6417  | 13.43147 | 17.28395 | 18.59026 | -1.13385 | 76.45087 | 65.85008 |
| YNL278W   | 412.2585 | 450.9112 | 450.5539 | 382.349  | 472.428  | 513.6782 | 0.058887 | 475.5694 | 570.7007 |
| YNL064C   | 7052.153 | 7617.038 | 6895.649 | 7786.668 | 7177.449 | 7008.528 | 0.027028 | 9357.361 | 9090.823 |
| YPL011C   | 583.8409 | 667.4673 | 580.9774 | 640.2332 | 602.6338 | 537.1607 | -0.04174 | 699.3006 | 856.929  |
| YNL287W   | 3581.351 | 3413.477 | 3937.406 | 3370.402 | 3956.873 | 4081.051 | 0.061499 | 4483.619 | 4595.458 |
| YBR094W   | 839.4872 | 845.4586 | 716.3412 | 912.4442 | 835.391  | 879.6128 | 0.129854 | 595.8671 | 664.6468 |
| YBR169C   | 946.5823 | 946.3203 | 940.6301 | 702.9134 | 751.2758 | 693.7102 | -0.39968 | 1174.87  | 1332.806 |
| YLL018C-F | 527.4145 | 822.7152 | 567.1446 | 612.4748 | 474.7325 | 411.921  | -0.35493 | 436.2197 | 445.1465 |
| YIL099W   | 25.33432 | 51.4197  | 42.48644 | 48.35328 | 40.32922 | 44.02956 | 0.154426 | 61.83526 | 76.38609 |
| YPR016C   | 4746.73  | 5575.082 | 5040.078 | 5303.638 | 5249.712 | 4402.956 | -0.0386  | 4430.778 | 3688.483 |
| YPL265W   | 2809.806 | 3893.065 | 3340.62  | 2141.871 | 2212.346 | 2116.354 | -0.6343  | 2537.494 | 3068.614 |
| YDR518W   | 1210.289 | 1151.999 | 1060.185 | 1288.525 | 1279.012 | 1256.31  | 0.159986 | 1437.951 | 1352.122 |
| YCL055W   | 928.1573 | 1014.55  | 1016.71  | 1092.426 | 1084.28  | 1051.817 | 0.125561 | 860.0723 | 763.8609 |
| YBR286W   | 17970.09 | 17340.31 | 18943.03 | 18049.2  | 18295.64 | 18398.49 | 0.012969 | 22332.65 | 22524.24 |
| YKL017C   | 422.6225 | 347.083  | 356.6885 | 346.5318 | 371.0288 | 366.913  | -0.05472 | 449.711  | 468.8526 |
| YAR035W   | 54.12332 | 92.951   | 84.97289 | 68.05276 | 43.78601 | 33.26678 | -0.67732 | 137.1619 | 114.1401 |
| YBL015W   | 1138.893 | 1080.803 | 912.9645 | 991.2421 | 943.7038 | 693.7102 | -0.25306 | 617.2283 | 729.6189 |
| YBR280C   | 236.0698 | 298.6298 | 232.1934 | 195.204  | 208.5597 | 183.9457 | -0.38392 | 272.0751 | 304.6664 |
| YGR209C   | 8345.355 | 6158.498 | 7026.072 | 7684.589 | 7854.98  | 7321.627 | 0.086558 | 6945.786 | 5605.159 |
| YPL120W   | 587.2956 | 575.5051 | 598.7624 | 526.5134 | 536.9548 | 687.8396 | -0.00842 | 405.8642 | 436.3665 |
| YBL076C   | 4759.397 | 5211.189 | 5483.715 | 5660.02  | 5697.943 | 6772.725 | 0.230425 | 6483.708 | 7066.153 |
| YBR166C   | 984.5837 | 931.4877 | 912.9645 | 1021.687 | 865.3499 | 942.2326 | 0.000119 | 1149.012 | 1067.649 |

|                   |          |          |          |          |          |          |          |          |          |
|-------------------|----------|----------|----------|----------|----------|----------|----------|----------|----------|
| YJR108W           | 49.51708 | 71.19651 | 41.49839 | 29.54922 | 26.50206 | 29.35304 | -0.9255  | 77.57515 | 57.07007 |
| YDR146C           | 864.8215 | 996.7512 | 910.9884 | 928.562  | 912.5927 | 1142.812 | 0.106012 | 1110.786 | 1230.08  |
| YML122C           | 127.8232 | 161.181  | 130.4235 | 162.073  | 193.5803 | 154.5927 | 0.282771 | 109.0549 | 70.24009 |
| YNL119W           | 899.3683 | 847.4363 | 771.6724 | 895.431  | 928.7244 | 931.4698 | 0.129828 | 769.0058 | 658.5008 |
| YLR438C- <i>f</i> | 2192.57  | 1399.209 | 1948.448 | 2009.347 | 2021.07  | 1747.484 | 0.0606   | 3129.989 | 2705.121 |
| YDR504C           | 163.5215 | 157.2256 | 100.7818 | 160.2822 | 148.642  | 167.3123 | 0.176046 | 101.185  | 79.0201  |
| YLR352W           | 504.3833 | 531.9962 | 576.0371 | 460.2515 | 426.3375 | 481.3899 | -0.23718 | 592.4942 | 549.6287 |
| YIL078W           | 10772.84 | 10070.35 | 10660.15 | 11131.1  | 11430.45 | 13128.64 | 0.180023 | 14464.95 | 13407.08 |
| YPR082C           | 794.5764 | 560.6725 | 612.5952 | 645.6058 | 695.9671 | 562.6    | -0.04745 | 449.711  | 435.4885 |
| YGL095C           | 848.6997 | 797.0054 | 724.2457 | 733.358  | 674.0741 | 760.2438 | -0.12871 | 908.4162 | 893.8051 |
| YMR154C           | 94.42792 | 138.4377 | 127.4593 | 140.5827 | 137.1194 | 161.4417 | 0.285395 | 174.263  | 205.4523 |
| YGL010W           | 238.3729 | 220.5114 | 220.3367 | 210.4263 | 187.8189 | 152.6358 | -0.30214 | 314.7977 | 267.7903 |
| YBR039W           | 4714.486 | 4366.719 | 4481.826 | 4362.54  | 4491.523 | 4379.474 | -0.03548 | 4368.942 | 3911.495 |
| YFR013W           | 897.0652 | 917.6439 | 999.9135 | 849.764  | 1001.317 | 1082.149 | 0.059549 | 1172.621 | 1109.793 |
| YPR124W           | 4866.492 | 4580.309 | 4593.476 | 4008.845 | 4073.251 | 3778.715 | -0.24337 | 4268.882 | 4123.971 |
| YOL067C           | 117.4591 | 164.1475 | 174.8861 | 183.5634 | 169.3827 | 252.4362 | 0.407255 | 204.6185 | 304.6664 |
| YOR391C           | 8.06092  | 19.77681 | 0        | 8.95431  | 11.52263 | 5.870608 | -0.07937 | 38.22543 | 28.97404 |
| YNL081C           | 1733.098 | 1449.64  | 1477.145 | 1409.408 | 1341.235 | 1270.987 | -0.21251 | 1405.347 | 1173.009 |
| YEL050W- <i>f</i> | 13.81872 | 10.87724 | 5.928341 | 8.058879 | 11.52263 | 12.71965 | 0.076909 | 0        | 5.268006 |
| YER025W           | 6391.158 | 6436.362 | 6745.464 | 6973.617 | 7360.659 | 8152.318 | 0.200201 | 8401.726 | 8272.526 |
| YDR439W           | 415.7131 | 337.1946 | 408.0675 | 420.8526 | 425.1852 | 489.2174 | 0.201778 | 565.5116 | 610.2107 |
| YHR029C           | 272.9197 | 177.9913 | 224.2889 | 226.544  | 222.3868 | 226.0184 | -0.00054 | 385.6272 | 316.9584 |
| YGR141W           | 348.9227 | 354.9937 | 367.5571 | 338.4729 | 338.7655 | 333.6462 | -0.08398 | 447.4624 | 468.8526 |
| YBR133C           | 1204.532 | 1300.325 | 1272.617 | 1259.871 | 1264.033 | 1211.302 | -0.01623 | 981.4942 | 1017.603 |
| YDR049W           | 909.7324 | 1025.428 | 934.7018 | 922.294  | 928.7244 | 903.0952 | -0.05939 | 1201.853 | 1221.299 |
| YDL065C           | 952.3401 | 905.7778 | 963.3554 | 980.497  | 949.4651 | 918.7502 | 0.013861 | 1128.775 | 1224.811 |
| YIL096C           | 859.0637 | 1038.282 | 927.7854 | 1074.517 | 1120     | 1059.645 | 0.203968 | 923.0318 | 841.125  |
| YLR150W           | 49233.79 | 39260.92 | 47907.91 | 50280.24 | 46859.1  | 49333.66 | 0.102763 | 65501.53 | 58655.74 |
| YLR086W           | 670.2079 | 616.0476 | 792.4216 | 709.1814 | 733.9918 | 925.5992 | 0.188474 | 852.2023 | 979.8492 |
| YDR375C           | 844.0934 | 896.8783 | 952.4868 | 856.9275 | 825.0206 | 787.6399 | -0.12519 | 740.8989 | 763.8609 |
| YNL148C           | 490.5645 | 535.9515 | 496.0045 | 589.1936 | 538.107  | 362.9993 | -0.03086 | 372.1358 | 325.7384 |
| YER119C- <i>f</i> | 0        | 1.977681 | 0        | 0        | 2.304527 | 5.870608 | 2.047433 | 8.99422  | 8.780011 |
| YBL097W           | 117.4591 | 150.3037 | 161.0533 | 119.0923 | 134.8148 | 205.4713 | 0.099324 | 218.1098 | 239.6943 |
| YLR253W           | 724.3312 | 822.7152 | 810.2066 | 703.8088 | 729.3828 | 646.7453 | -0.18057 | 989.3642 | 995.6532 |
| YDL204W           | 2772.956 | 3111.881 | 3007.645 | 1993.229 | 1903.539 | 1777.816 | -0.64807 | 3373.957 | 3584.878 |
| YER133W- <i>f</i> | 44.91084 | 34.60942 | 51.37895 | 45.66698 | 58.76544 | 56.74921 | 0.300231 | 82.07226 | 77.26409 |
| YDL171C           | 2981.389 | 3212.743 | 3212.173 | 3277.278 | 3381.893 | 4106.49  | 0.194737 | 3970.948 | 4025.635 |
| YMR206W           | 32.24368 | 19.77681 | 60.27147 | 16.11776 | 16.13169 | 23.48243 | -1.01068 | 82.07226 | 53.55807 |
| YNL272C           | 992.6447 | 931.4877 | 1035.484 | 957.2158 | 988.6421 | 1181.949 | 0.079742 | 1189.486 | 1250.274 |
| YML061C           | 932.7636 | 993.7846 | 1099.707 | 925.8757 | 1144.198 | 1213.259 | 0.117627 | 690.3064 | 767.3729 |
| YHL024W           | 223.4026 | 315.4401 | 181.8025 | 231.9166 | 169.3827 | 167.3123 | -0.34185 | 134.9133 | 122.9202 |
| YGL170C           | 44.91084 | 45.48666 | 35.57005 | 42.98069 | 34.5679  | 42.07269 | -0.07458 | 57.33815 | 88.67811 |
| YPR133C           | 2567.979 | 2570.985 | 2505.712 | 2945.968 | 2733.169 | 2877.576 | 0.162601 | 3180.581 | 3065.102 |
| YJL193W           | 544.6879 | 564.6279 | 470.315  | 565.017  | 587.6544 | 434.425  | 0.006802 | 348.526  | 358.2244 |
| YBR084W           | 4655.757 | 5211.189 | 4949.177 | 5428.103 | 5600     | 6048.683 | 0.204869 | 4643.266 | 4679.746 |
| YOL160W           | 0        | 0        | 0        | 0        | 0        | 0        | #DIV/0!  | 4.49711  | 0.878001 |
| YIL157C           | 813.0013 | 801.9496 | 733.1382 | 677.8413 | 653.3334 | 598.802  | -0.2829  | 684.685  | 696.2549 |
| YOL034W           | 481.3521 | 419.2683 | 451.542  | 477.2647 | 492.0165 | 639.8963 | 0.251055 | 619.4769 | 640.9408 |
| YIRO30W- <i>f</i> | 3.45468  | 0.98884  | 3.952227 | 7.163448 | 1.152263 | 1.956869 | 0.291068 | 0        | 0        |
| YOR272W           | 3208.246 | 3597.401 | 3052.108 | 3790.36  | 3722.963 | 3584.006 | 0.170881 | 3203.067 | 2969.4   |
| YML086C           | 1678.974 | 2010.313 | 1655.983 | 1825.784 | 1797.531 | 1664.317 | -0.01564 | 1400.85  | 1570.744 |
| YLR041W           | 2.30312  | 7.910723 | 3.952227 | 4.477155 | 8.065844 | 2.935304 | 0.127808 | 1.124277 | 0        |
| YOR124C           | 1169.985 | 881.0568 | 1042.4   | 998.4056 | 940.247  | 1133.027 | -0.01018 | 1164.751 | 1423.24  |
| YMR240C           | 571.1737 | 669.445  | 670.8906 | 632.1743 | 596.8725 | 633.0473 | -0.03779 | 766.7572 | 798.981  |

|           |          |          |          |          |          |          |          |          |          |
|-----------|----------|----------|----------|----------|----------|----------|----------|----------|----------|
| YMR251W   | 133.581  | 175.0248 | 100.7818 | 96.70655 | 64.52675 | 49.90017 | -0.95531 | 83.19653 | 64.09408 |
| YPL166W   | 27.63744 | 36.5871  | 58.29535 | 47.45784 | 35.72017 | 45.98643 | 0.076193 | 80.94798 | 98.33612 |
| YJL105W   | 224.5542 | 294.6744 | 221.3247 | 212.2172 | 244.2799 | 240.6949 | -0.08705 | 123.6705 | 138.7242 |
| YPR187W   | 3974.033 | 3626.078 | 3589.61  | 4089.433 | 3978.766 | 3825.68  | 0.088045 | 3716.861 | 3359.232 |
| YKR056W   | 2191.419 | 2198.192 | 2206.331 | 2601.227 | 2846.091 | 2827.676 | 0.32718  | 2097.902 | 2207.295 |
| YHR028C   | 1995.653 | 1640.486 | 2008.72  | 1766.685 | 1918.519 | 2281.71  | 0.080047 | 1517.775 | 1513.674 |
| YBR129C   | 801.4857 | 791.0723 | 770.6843 | 689.4819 | 738.6009 | 665.3356 | -0.17491 | 609.3584 | 519.7766 |
| YAL007C   | 2508.098 | 2147.761 | 2436.548 | 2328.121 | 2399.013 | 2240.615 | -0.02558 | 3144.604 | 2880.722 |
| YKL039W   | 2377.971 | 2772.709 | 2475.082 | 2471.39  | 2487.737 | 2203.435 | -0.09041 | 2145.121 | 2012.378 |
| YGL021W   | 830.2747 | 995.7623 | 1108.6   | 1009.151 | 1049.712 | 1350.24  | 0.21621  | 1172.621 | 1324.026 |
| YLR295C   | 2403.306 | 2698.546 | 2563.019 | 2434.677 | 2425.515 | 2274.861 | -0.10334 | 2310.39  | 2297.729 |
| YPL185W   | 14.97028 | 16.81029 | 13.8328  | 4.477155 | 6.913581 | 11.74122 | -0.97957 | 3.372832 | 4.390005 |
| YLR332W   | 817.6076 | 891.9341 | 775.6246 | 715.4494 | 835.391  | 835.5832 | -0.05849 | 1084.928 | 1167.741 |
| YNL204C   | 126.6716 | 76.14071 | 93.8654  | 153.1187 | 155.5556 | 144.8083 | 0.612151 | 104.5578 | 94.82412 |
| YGR201C   | 1017.979 | 1019.494 | 1092.791 | 894.5356 | 763.9507 | 741.6535 | -0.38317 | 1363.749 | 1169.497 |
| YJR083C   | 456.0177 | 514.197  | 464.3867 | 514.8728 | 501.2346 | 536.1822 | 0.113748 | 552.0202 | 580.3587 |
| YGL038C   | 1540.787 | 1357.678 | 1465.288 | 1387.918 | 1442.634 | 1435.364 | -0.03271 | 951.1387 | 1095.745 |
| YPR122W   | 1150.408 | 1136.178 | 1218.274 | 1127.348 | 1118.848 | 1264.138 | 0.002251 | 762.2601 | 906.0971 |
| YPR196W   | 247.5854 | 399.4915 | 269.7395 | 307.1328 | 299.5885 | 261.2421 | -0.079   | 207.9913 | 164.1862 |
| YJL165C   | 1149.257 | 1072.892 | 1339.805 | 1313.597 | 1317.037 | 1896.206 | 0.345836 | 1578.486 | 1982.526 |
| YDR217C   | 548.1425 | 416.3018 | 534.5387 | 546.2129 | 574.9795 | 793.5106 | 0.353136 | 638.5896 | 863.9531 |
| YOL063C   | 418.0163 | 490.4649 | 428.8167 | 413.6891 | 430.9465 | 406.0504 | -0.0966  | 628.4711 | 561.9207 |
| YOR162C   | 399.5913 | 390.592  | 509.8373 | 404.7348 | 449.3828 | 464.7565 | 0.020772 | 529.5347 | 579.4807 |
| YDL235C   | 1380.72  | 1220.229 | 1328.936 | 1262.558 | 1458.766 | 1409.924 | 0.07209  | 1196.231 | 1099.257 |
| YGL066W   | 602.2658 | 531.9962 | 805.2663 | 623.22   | 642.963  | 812.1008 | 0.099687 | 816.2254 | 903.4631 |
| YIL016W   | 1394.539 | 1295.381 | 1370.435 | 1392.395 | 1372.346 | 1173.143 | -0.04419 | 1143.39  | 1056.235 |
| YOL010W   | 1875.891 | 2355.418 | 1975.126 | 2310.212 | 2195.062 | 1886.422 | 0.042434 | 1762.867 | 1662.934 |
| YGR280C   | 3994.761 | 4065.123 | 4033.248 | 4881.89  | 4519.177 | 4390.237 | 0.189571 | 3735.974 | 3797.355 |
| YGR002C   | 883.2465 | 785.1393 | 773.6485 | 726.1946 | 770.8643 | 775.8987 | -0.10351 | 943.2688 | 1035.163 |
| YNL258C   | 845.245  | 901.8225 | 938.654  | 873.9407 | 851.5227 | 1108.567 | 0.077545 | 1091.673 | 1191.447 |
| YLL008W   | 3015.935 | 3310.638 | 2922.672 | 3659.627 | 3743.704 | 3872.645 | 0.285845 | 2464.416 | 2916.72  |
| YKR053C   | 469.8365 | 440.034  | 429.8047 | 550.6901 | 463.2099 | 511.7214 | 0.187514 | 349.6503 | 352.9564 |
| YGL175C   | 36.84992 | 53.39738 | 64.22369 | 51.935   | 81.81071 | 91.97286 | 0.547189 | 85.44509 | 115.0181 |
| YML089C   | 8.06092  | 20.76565 | 9.880568 | 21.49034 | 5.761317 | 13.69809 | 0.081255 | 6.745665 | 1.756002 |
| YJR010C-1 | 735.8468 | 800.9608 | 680.7712 | 627.6971 | 702.8807 | 564.5568 | -0.22668 | 594.7428 | 499.5826 |
| YDL045W-1 | 1249.443 | 1208.363 | 1174.8   | 1190.923 | 1259.424 | 1003.874 | -0.07264 | 1160.254 | 941.2172 |
| YAR019C   | 229.1604 | 279.8418 | 296.417  | 249.8253 | 305.3498 | 275.9186 | 0.045271 | 338.4075 | 440.7565 |
| YDR006C   | 1211.441 | 1329.002 | 1344.745 | 1240.172 | 1340.082 | 1472.544 | 0.060934 | 1621.208 | 1684.006 |
| YBR147W   | 73.69984 | 80.09608 | 79.04455 | 66.2619  | 70.28807 | 38.15895 | -0.41439 | 94.43931 | 135.2122 |
| YJL110C   | 1332.355 | 1421.953 | 1464.3   | 1443.435 | 1348.148 | 1327.736 | -0.03436 | 1162.503 | 1109.793 |
| YOR062C   | 389.2273 | 499.3644 | 384.3541 | 318.7734 | 337.6132 | 259.2852 | -0.47527 | 256.3353 | 188.7702 |
| YLR132C   | 162.37   | 254.132  | 156.113  | 123.5695 | 140.5761 | 139.9162 | -0.50299 | 195.6243 | 206.3303 |
| YDR391C   | 1128.529 | 903.8002 | 909.0123 | 890.0584 | 963.2923 | 890.3756 | -0.10034 | 974.7486 | 852.539  |
| YBR167C   | 494.0192 | 580.4493 | 524.6582 | 529.1997 | 523.1276 | 454.9721 | -0.08532 | 417.1069 | 373.1505 |
| YKL096W   | 24016.93 | 21622.97 | 22157.17 | 17703.57 | 18031.77 | 15362.4  | -0.40796 | 25355.83 | 22975.53 |
| YLR430W   | 1362.295 | 1376.466 | 1528.524 | 1547.305 | 1516.379 | 1576.258 | 0.120788 | 1151.26  | 1272.224 |
| YML041C   | 327.043  | 305.5517 | 278.632  | 273.1065 | 284.6091 | 263.1989 | -0.15058 | 476.6937 | 316.9584 |
| YER058W   | 651.7829 | 574.5163 | 467.3509 | 530.0952 | 510.4527 | 426.5975 | -0.20712 | 477.8179 | 336.2744 |
| YDR379C-1 | 475.5943 | 429.1567 | 424.8644 | 325.0415 | 402.14   | 362.9993 | -0.28644 | 348.526  | 303.7884 |
| YGR090W   | 2564.524 | 2508.688 | 2895.995 | 2965.668 | 3268.971 | 3737.621 | 0.323484 | 2257.549 | 2430.307 |
| YOR092W   | 700.1484 | 670.4338 | 898.1437 | 791.561  | 829.6297 | 878.6344 | 0.139945 | 948.8902 | 1041.309 |
| YKL135C   | 753.1202 | 768.329  | 882.3347 | 805.8879 | 813.498  | 1106.61  | 0.181476 | 953.3873 | 1109.793 |
| YIL129C   | 928.1573 | 944.3426 | 1077.97  | 973.3335 | 967.9013 | 1179.014 | 0.080716 | 1226.587 | 1280.126 |
| YKL137W   | 792.2732 | 862.2689 | 777.6007 | 749.4758 | 735.1441 | 653.5944 | -0.18582 | 792.6156 | 708.5469 |



|         |          |          |          |          |          |          |          |          |          |
|---------|----------|----------|----------|----------|----------|----------|----------|----------|----------|
| YJL176C | 910.8839 | 886.9899 | 876.4064 | 1019.896 | 823.8684 | 1101.717 | 0.139353 | 1156.882 | 1237.104 |
| YHR171W | 162.37   | 186.8908 | 173.898  | 119.9878 | 161.3169 | 152.6358 | -0.26975 | 248.4653 | 209.8423 |
| YPR006C | 138.1872 | 153.2703 | 113.6265 | 77.00707 | 138.2716 | 85.12382 | -0.43132 | 212.4884 | 168.5762 |
| YJL124C | 3121.879 | 2869.615 | 3142.021 | 3101.773 | 3136.461 | 2882.469 | -0.00203 | 3730.353 | 3679.703 |
| YHR107C | 2334.212 | 2123.04  | 2412.835 | 2592.273 | 2480.823 | 2467.612 | 0.134372 | 2718.503 | 2817.505 |
| YDL056W | 707.0578 | 827.6594 | 891.2273 | 766.489  | 808.889  | 1030.292 | 0.103108 | 898.2977 | 1115.061 |
| YNL053W | 917.7933 | 972.0301 | 931.7376 | 900.8036 | 997.8602 | 888.4187 | -0.01774 | 733.0289 | 682.2068 |
| YPR149W | 10252.34 | 11532.85 | 10803.41 | 9997.487 | 10582.39 | 8957.57  | -0.14182 | 8750.252 | 8655.335 |
| YPL248C | 222.2511 | 198.7569 | 192.6711 | 151.3278 | 195.8848 | 150.6789 | -0.30165 | 245.0925 | 272.1803 |
| YPR141C | 431.835  | 418.2795 | 462.4106 | 422.6434 | 433.2511 | 565.5353 | 0.114998 | 554.2688 | 591.7727 |
| YOL166C | 2.30312  | 5.933043 | 0        | 0        | 6.913581 | 4.892174 | 0.519446 | 0        | 0        |
| YBL074C | 139.3388 | 158.2145 | 161.0533 | 148.6416 | 138.2716 | 200.5791 | 0.088123 | 50.59249 | 85.1661  |
| YHL001W | 15845.46 | 13391.87 | 14676.6  | 16100.75 | 15651.19 | 13304.76 | 0.037063 | 14102.94 | 12332.4  |
| YJL070C | 259.101  | 238.3105 | 319.1424 | 232.8121 | 231.605  | 272.0049 | -0.14902 | 305.8035 | 421.4405 |
| YBL016W | 3763.298 | 4352.876 | 3872.195 | 4292.696 | 4193.087 | 3625.101 | 0.014669 | 3280.642 | 2958.864 |
| YHR008C | 19485.55 | 15443.71 | 19183.12 | 20128.39 | 19026.17 | 18782.03 | 0.098516 | 16032.2  | 15176.25 |
| YDR527W | 1725.037 | 1896.596 | 1790.359 | 1764.895 | 1756.05  | 1674.102 | -0.05902 | 1517.775 | 1376.706 |
| YKL186C | 2147.659 | 1975.703 | 2083.812 | 2053.223 | 2040.659 | 1744.549 | -0.08836 | 2548.737 | 2364.457 |
| YDR402C | 24.18276 | 20.76565 | 15.80891 | 31.34009 | 12.6749  | 28.37461 | 0.252724 | 4.49711  | 10.53601 |
| YPL252C | 596.508  | 554.7395 | 518.7298 | 615.1611 | 530.0412 | 455.9506 | -0.06072 | 478.9422 | 459.1946 |
| YGR179C | 340.8617 | 316.4289 | 347.796  | 274.0019 | 274.2387 | 352.2365 | -0.15856 | 389      | 463.5846 |
| YGR089W | 1611.032 | 1600.933 | 1886.2   | 1738.927 | 1656.955 | 1966.654 | 0.072937 | 1223.214 | 1444.312 |
| YGL166W | 221.0995 | 265.9981 | 231.2053 | 185.3542 | 171.6873 | 137.9593 | -0.53716 | 136.0376 | 133.4562 |
| YNL242W | 234.9182 | 298.6298 | 237.1336 | 189.8314 | 205.1029 | 226.9969 | -0.30938 | 326.0405 | 310.8124 |
| YKL064W | 1425.631 | 1361.633 | 1579.903 | 1306.434 | 1380.412 | 1931.43  | 0.080656 | 1824.702 | 2128.275 |
| YML130C | 1748.068 | 1839.243 | 1919.794 | 2350.506 | 2289.548 | 2480.332 | 0.370661 | 2488.026 | 2626.979 |
| YKL155C | 841.7903 | 911.7109 | 800.326  | 815.7377 | 770.8643 | 791.5537 | -0.10282 | 623.974  | 719.0829 |
| YHR011W | 344.3164 | 425.2014 | 325.0707 | 368.9176 | 362.963  | 356.1502 | -0.00867 | 240.5954 | 282.7163 |
| YLR278C | 842.9419 | 827.6594 | 884.3109 | 892.7447 | 783.5392 | 973.5425 | 0.052624 | 938.7717 | 1196.715 |
| YLR224W | 1408.358 | 1518.859 | 1475.169 | 1328.82  | 1346.996 | 1240.655 | -0.16873 | 1288.422 | 1129.109 |
| YOR392W | 0        | 0        | 0        | 0        | 0        | 0        | #DIV/0!  | 0        | 4.390005 |
| YHR149C | 1665.156 | 1785.846 | 1823.953 | 1935.922 | 2019.918 | 2167.233 | 0.215097 | 1273.806 | 1495.236 |
| YGL250W | 382.3179 | 395.5362 | 303.3334 | 313.4009 | 347.9836 | 283.7461 | -0.19403 | 540.7775 | 484.6566 |
| YJR121W | 13599.92 | 13862.55 | 14041.28 | 12841.38 | 13223.38 | 13404.56 | -0.07251 | 13055.11 | 13546.68 |
| YML022W | 4664.969 | 4574.376 | 4484.79  | 5115.597 | 5028.478 | 4104.534 | 0.054106 | 4502.731 | 3784.185 |
| YOR370C | 2717.681 | 3144.513 | 2867.341 | 3098.191 | 3192.922 | 3277.756 | 0.132444 | 2521.754 | 2428.551 |
| YMR261C | 2194.873 | 2019.212 | 2128.274 | 1745.195 | 1767.572 | 2238.659 | -0.1411  | 2556.607 | 2624.345 |
| YPL088W | 963.8557 | 868.2019 | 877.3945 | 1075.413 | 971.3581 | 854.1735 | 0.098521 | 1297.416 | 1102.769 |
| YER130C | 696.6938 | 829.6371 | 741.0426 | 833.6463 | 717.8601 | 708.3867 | -0.00477 | 566.6358 | 561.0427 |
| YLR183C | 814.1529 | 797.0054 | 1041.412 | 990.3467 | 970.2058 | 1095.847 | 0.204442 | 1086.052 | 1127.353 |
| YDR089W | 903.9746 | 796.0165 | 840.8364 | 794.2473 | 944.856  | 1078.235 | 0.149034 | 902.7948 | 1055.357 |
| YHR131C | 356.9836 | 390.592  | 430.7928 | 367.1267 | 309.9589 | 442.2525 | -0.07414 | 439.5925 | 579.4807 |
| YGL232W | 1256.352 | 1210.341 | 1225.19  | 1284.944 | 1426.502 | 1372.744 | 0.145693 | 1196.231 | 1184.423 |
| YFL064C | 5.7578   | 2.966521 | 3.952227 | 1.790862 | 2.304527 | 6.849043 | -0.21196 | 0        | 0        |
| YPL132W | 770.3936 | 815.7934 | 797.3619 | 822.0057 | 811.1935 | 703.4946 | -0.02864 | 654.3295 | 620.7468 |
| YOR052C | 1515.453 | 1821.444 | 1333.877 | 1112.125 | 925.2676 | 820.9067 | -0.7085  | 1533.514 | 1377.584 |
| YNL175C | 1802.191 | 1721.571 | 1684.637 | 2004.87  | 2086.749 | 1882.508 | 0.197888 | 2710.633 | 2221.343 |
| YHR040W | 1492.422 | 1560.39  | 1336.841 | 1715.646 | 1681.152 | 1375.679 | 0.120632 | 1235.581 | 1304.71  |
| YFL045C | 15745.28 | 13992.09 | 15167.66 | 15024.44 | 14879.18 | 14376.14 | -0.02023 | 13900.57 | 12671.31 |
| YKR026C | 2270.876 | 2342.563 | 2166.809 | 2265.44  | 2303.375 | 2047.864 | -0.03523 | 1962.988 | 1705.078 |
| YOL104C | 6.90936  | 0.98884  | 9.880568 | 8.058879 | 4.609054 | 12.71965 | 0.513968 | 38.22543 | 10.53601 |
| YGR109C | 184.2496 | 154.2591 | 166.9816 | 125.3603 | 144.0329 | 193.7301 | -0.12629 | 245.0925 | 185.2582 |
| YKR016W | 2193.722 | 2149.739 | 2316.993 | 2364.833 | 2302.222 | 2620.248 | 0.129765 | 1997.841 | 2058.913 |
| YBR017C | 2075.111 | 2207.092 | 2209.295 | 2183.956 | 2280.329 | 2488.159 | 0.098969 | 2586.962 | 2625.223 |

|           |          |          |          |          |          |          |          |          |          |
|-----------|----------|----------|----------|----------|----------|----------|----------|----------|----------|
| YKL109W   | 825.6685 | 841.5032 | 807.2424 | 779.025  | 818.1071 | 949.0817 | 0.041267 | 1082.679 | 1303.832 |
| YKR034W   | 14.97028 | 13.84377 | 7.904455 | 2.686293 | 2.304527 | 3.913739 | -2.04389 | 0        | 3.512004 |
| YOR199W   | 52.97176 | 60.31927 | 82.99677 | 75.21621 | 93.33334 | 108.6063 | 0.497727 | 26.98266 | 56.19207 |
| YPL108W   | 641.4189 | 588.3601 | 579.9894 | 692.1682 | 689.0536 | 476.4977 | 0.037728 | 372.1358 | 482.9006 |
| YOR187W   | 5716.344 | 6528.325 | 6248.471 | 5949.244 | 5847.737 | 5471.407 | -0.09886 | 5856.361 | 5702.617 |
| YNL259C   | 442.199  | 410.3688 | 317.1662 | 327.7278 | 362.963  | 422.6838 | -0.07124 | 413.7341 | 262.5223 |
| YLR301W   | 3216.307 | 2746.999 | 2949.35  | 3039.093 | 2897.943 | 2940.196 | -0.00575 | 3714.613 | 3360.988 |
| YLR182W   | 831.4263 | 935.4431 | 945.5704 | 908.8625 | 981.7285 | 1218.151 | 0.19674  | 1137.769 | 1253.786 |
| YBR246W   | 1244.836 | 1260.772 | 1221.238 | 1251.813 | 1194.897 | 1265.116 | -0.00583 | 1051.199 | 1040.431 |
| YPL146C   | 2814.412 | 2349.485 | 2552.151 | 2920.896 | 2979.753 | 3260.144 | 0.24761  | 2346.367 | 2500.547 |
| YDR476C   | 1665.156 | 1656.308 | 1417.862 | 1431.794 | 1538.272 | 1255.332 | -0.16559 | 2056.304 | 1820.974 |
| YNL103W   | 1221.805 | 1279.56  | 1279.534 | 1289.421 | 1141.893 | 1298.383 | -0.01967 | 867.9422 | 985.9952 |
| YHR161C   | 1173.44  | 1089.702 | 1060.185 | 844.3915 | 872.2634 | 894.2893 | -0.34806 | 1032.087 | 1251.152 |
| YIL152W   | 497.4739 | 383.6701 | 462.4106 | 440.5521 | 395.2264 | 365.9346 | -0.16096 | 555.3931 | 552.2627 |
| YOL012C   | 2502.34  | 2261.478 | 2391.098 | 2400.651 | 2306.831 | 1888.379 | -0.11737 | 1945     | 1784.098 |
| YNL089C   | 25.33432 | 21.75449 | 8.892511 | 17.01319 | 14.97943 | 14.67652 | -0.26248 | 6.745665 | 3.512004 |
| YPL105C   | 2741.864 | 2629.327 | 2869.317 | 2946.864 | 2816.132 | 3336.462 | 0.143047 | 3091.763 | 3531.32  |
| YKL025C   | 898.2168 | 800.9608 | 824.0394 | 736.9397 | 748.9713 | 998.0034 | -0.02265 | 1077.058 | 1066.771 |
| YHR085W   | 1248.291 | 1424.919 | 1302.259 | 1420.154 | 1455.309 | 1296.426 | 0.069576 | 1175.994 | 1152.815 |
| YJR035W   | 294.7993 | 270.9423 | 348.7841 | 344.7409 | 300.7408 | 476.4977 | 0.294951 | 389      | 540.8487 |
| YER180C-I | 81.76076 | 107.7836 | 109.6743 | 103.87   | 118.6831 | 122.3043 | 0.2048   | 155.1503 | 169.4542 |
| YLR157W-I | 5.7578   | 3.955362 | 3.952227 | 0.895431 | 0        | 3.913739 | -1.50667 | 0        | 0        |
| YMR323W   | 27.63744 | 24.72101 | 21.73725 | 17.90862 | 14.97943 | 17.61182 | -0.55311 | 4.49711  | 12.29202 |
| YCL032W   | 674.8141 | 796.0165 | 627.4161 | 665.3053 | 591.1112 | 557.7078 | -0.20991 | 957.8844 | 819.175  |
| YMR022W   | 1103.194 | 948.298  | 1001.89  | 1049.445 | 989.7943 | 964.7366 | -0.02353 | 1363.749 | 1163.351 |
| YNL305C   | 1378.417 | 1417.997 | 1222.226 | 1125.557 | 1199.506 | 1004.852 | -0.27122 | 1496.413 | 1547.916 |
| YKL055C   | 128.9747 | 201.7234 | 175.8741 | 153.1187 | 147.4897 | 133.0671 | -0.22415 | 101.185  | 119.4081 |
| YER049W   | 3965.972 | 4111.599 | 4301.011 | 4950.838 | 5165.597 | 5701.339 | 0.353701 | 3890     | 3905.349 |
| YPL163C   | 3740.267 | 3074.305 | 3386.071 | 3586.201 | 3543.21  | 3585.963 | 0.071022 | 2687.023 | 2727.949 |
| YBR294W   | 161.2184 | 137.4488 | 116.5907 | 98.49741 | 170.535  | 136.9809 | -0.03248 | 93.31503 | 106.2381 |
| YBR182C   | 152.0059 | 206.6677 | 187.7308 | 170.1319 | 200.4938 | 189.8163 | 0.036596 | 207.9913 | 237.0603 |
| YML059C   | 1408.358 | 1365.589 | 1649.067 | 1413.886 | 1583.21  | 2145.707 | 0.217525 | 1043.33  | 1166.863 |
| YPL283C   | 1.15156  | 0        | 0.988057 | 0.895431 | 1.152263 | 0        | -0.06335 | 0        | 4.390005 |
| Q0275     | 0        | 0        | 0        | 0        | 0        | 0        | #DIV/0!  | 6.745665 | 5.268006 |
| YDR489W   | 365.0445 | 383.6701 | 343.8438 | 359.0678 | 323.786  | 276.897  | -0.18698 | 429.474  | 428.4645 |
| YLR017W   | 2529.977 | 2560.108 | 2581.792 | 2705.097 | 2712.428 | 2450.001 | 0.03633  | 2407.078 | 2139.689 |
| YDR323C   | 228.0089 | 194.8016 | 230.2172 | 181.7725 | 170.535  | 182.9673 | -0.28686 | 276.5723 | 273.0583 |
| YKL105C   | 834.881  | 600.2261 | 764.756  | 681.423  | 737.4486 | 945.1679 | 0.10384  | 860.0723 | 1188.813 |
| YGL014W   | 1267.867 | 1571.267 | 1489.99  | 1595.658 | 1457.613 | 1451.019 | 0.057224 | 1106.289 | 1312.612 |
| YIL044C   | 1093.982 | 1128.267 | 1140.218 | 1088.844 | 1040.494 | 1026.378 | -0.09155 | 1288.422 | 1294.174 |
| YIRO20W-I | 4.60624  | 14.83261 | 11.85668 | 10.74517 | 4.609054 | 2.935304 | -0.77494 | 22.48555 | 10.53601 |
| YBR281C   | 679.4204 | 712.954  | 775.6246 | 830.96   | 712.0988 | 895.2678 | 0.169527 | 829.7168 | 913.9991 |
| YMR112C   | 457.1693 | 390.592  | 360.6407 | 397.5714 | 352.5926 | 353.2149 | -0.13117 | 571.133  | 498.7046 |
| YOR232W   | 4215.861 | 3506.428 | 3966.06  | 4004.368 | 4098.601 | 3827.637 | 0.029596 | 5466.237 | 5006.362 |
| YNR016C   | 15250.11 | 14611.11 | 15666.63 | 16324.6  | 16367.9  | 18959.13 | 0.182065 | 12815.64 | 13327.18 |
| YKL118W   | 6.90936  | 5.933043 | 6.916398 | 4.477155 | 4.609054 | 4.892174 | -0.4993  | 0        | 2.634003 |
| YJR144W   | 2274.331 | 2172.482 | 2158.904 | 2134.708 | 2019.918 | 1977.417 | -0.10735 | 1902.277 | 1770.928 |
| YHR096C   | 84.06388 | 133.4935 | 97.81763 | 107.4517 | 108.3128 | 87.08069 | -0.05849 | 159.6474 | 136.9682 |
| YDL180W   | 454.8662 | 477.6099 | 449.5659 | 395.7805 | 375.6379 | 480.4114 | -0.14276 | 278.8208 | 345.0544 |
| YMR093W   | 1888.558 | 2123.04  | 1941.532 | 2138.289 | 2007.243 | 2204.413 | 0.093096 | 1716.772 | 1673.47  |
| YJR107W   | 340.8617 | 333.2392 | 361.6288 | 348.3227 | 341.07   | 333.6462 | -0.01779 | 293.4364 | 208.0863 |
| YDR412W   | 163.5215 | 171.0694 | 155.1249 | 198.7857 | 212.0165 | 173.1829 | 0.253987 | 122.5462 | 121.1641 |
| YOR214C   | 21.87964 | 14.83261 | 10.86863 | 22.38578 | 9.218108 | 15.65496 | -0.0098  | 2.248555 | 1.756002 |
| YMR190C   | 519.3535 | 432.1233 | 568.1327 | 504.1277 | 510.4527 | 591.953  | 0.08025  | 608.2341 | 718.2049 |

|                   |          |          |          |          |          |          |          |          |          |
|-------------------|----------|----------|----------|----------|----------|----------|----------|----------|----------|
| YOR069W           | 771.5452 | 685.2664 | 763.7679 | 644.7103 | 680.9877 | 793.5106 | -0.06741 | 808.3555 | 877.1231 |
| YGL215W           | 1569.576 | 2041.955 | 1587.807 | 1598.344 | 1673.087 | 1568.431 | -0.10336 | 1201.853 | 1544.404 |
| YKL136W           | 14.97028 | 8.899564 | 12.84474 | 17.90862 | 4.609054 | 3.913739 | -0.4741  | 1.124277 | 6.146008 |
| YKL167C           | 937.3698 | 876.1126 | 863.5617 | 719.9265 | 704.033  | 704.473  | -0.33085 | 751.0174 | 740.1549 |
| YJL115W           | 1122.771 | 1319.113 | 1240.011 | 1328.82  | 1484.115 | 1205.432 | 0.126161 | 1111.91  | 967.5572 |
| YDR528W           | 857.9122 | 633.8467 | 854.6692 | 825.5874 | 849.2182 | 963.7582 | 0.169287 | 584.6243 | 662.8908 |
| YNL018C           | 150.8544 | 204.69   | 150.1846 | 87.75224 | 99.09466 | 135.024  | -0.65188 | 170.8902 | 233.5483 |
| YOR368W           | 472.1396 | 419.2683 | 415.9719 | 402.944  | 307.6543 | 346.3659 | -0.30675 | 240.5954 | 269.5463 |
| YOR273C           | 1539.636 | 2131.94  | 1619.425 | 1691.469 | 1522.14  | 1160.424 | -0.27458 | 1021.968 | 1060.625 |
| YPR200C           | 34.5468  | 50.43086 | 31.61782 | 30.44465 | 56.46091 | 43.05113 | 0.156519 | 26.98266 | 18.43802 |
| YNL304W           | 268.3135 | 346.0942 | 328.0349 | 361.7541 | 306.5021 | 346.3659 | 0.106466 | 353.0231 | 446.0245 |
| YCL001W           | 1432.541 | 1480.294 | 1317.08  | 1484.625 | 1472.593 | 1259.245 | -0.0046  | 1175.994 | 1145.791 |
| YNL202W           | 43.75928 | 46.4755  | 38.53422 | 55.51672 | 53.00412 | 65.55513 | 0.434932 | 21.36127 | 37.75405 |
| YHR214W           | 5.7578   | 0        | 1.976114 | 7.163448 | 3.45679  | 9.784347 | 1.399623 | 0        | 0.878001 |
| YMR269W           | 1131.983 | 1007.628 | 991.021  | 1154.211 | 1164.938 | 1126.178 | 0.138187 | 965.7544 | 806.005  |
| YJL051W           | 872.8824 | 626.9248 | 813.1708 | 842.6006 | 757.0371 | 952.9954 | 0.142235 | 1102.916 | 1082.575 |
| YPL152W           | 353.5289 | 326.3173 | 364.593  | 287.4334 | 336.4609 | 270.048  | -0.22447 | 372.1358 | 367.0044 |
| YPR119W           | 856.7606 | 783.1616 | 977.1882 | 958.1112 | 1035.885 | 1280.771 | 0.323418 | 1258.066 | 1367.926 |
| YLR063W           | 658.6923 | 758.4406 | 714.3651 | 765.5935 | 858.4363 | 733.826  | 0.145608 | 552.0202 | 548.7507 |
| YPR202W           | 0        | 0        | 0        | 0        | 0        | 0        | #DIV/0!  | 0        | 0        |
| YPR105C           | 1163.076 | 1074.87  | 1166.895 | 1036.014 | 1099.259 | 1365.895 | 0.040249 | 1226.587 | 1482.066 |
| YPR185W           | 469.8365 | 398.5027 | 557.264  | 478.1602 | 478.1893 | 579.2334 | 0.107214 | 499.1792 | 640.9408 |
| YCR085W           | 18.42496 | 27.68753 | 5.928341 | 11.6406  | 20.74074 | 19.56869 | -0.00252 | 0        | 5.268006 |
| YOR194C           | 2060.141 | 1965.815 | 2160.88  | 2119.485 | 2033.745 | 2040.036 | 0.001499 | 2456.546 | 2697.219 |
| YDL231C           | 2108.506 | 2314.875 | 2316.993 | 2115.904 | 2359.836 | 2629.054 | 0.075964 | 1939.379 | 1947.406 |
| YDL232W           | 773.8483 | 814.8045 | 749.9351 | 773.6524 | 863.0453 | 742.6319 | 0.024918 | 702.6734 | 558.4087 |
| YOR202W           | 1644.428 | 1541.602 | 1481.097 | 1512.383 | 1540.576 | 1301.318 | -0.1001  | 1907.899 | 1799.024 |
| YIL037C           | 99.03415 | 102.8394 | 86.949   | 100.2883 | 78.35392 | 39.13739 | -0.40731 | 62.95954 | 57.94807 |
| YBR282W           | 1097.437 | 1041.249 | 1073.03  | 930.3528 | 946.0083 | 797.4243 | -0.26446 | 916.2861 | 898.1951 |
| YNL176C           | 1099.74  | 1058.059 | 1067.101 | 1154.211 | 1085.432 | 1294.469 | 0.132093 | 1175.994 | 1359.146 |
| YER071C           | 418.0163 | 346.0942 | 298.3932 | 313.4009 | 358.3539 | 335.6031 | -0.07689 | 550.896  | 439.0005 |
| YLR185W           | 16652.71 | 11936.29 | 13403.98 | 14896.39 | 15070.45 | 14109.03 | 0.069841 | 14902.3  | 12515.03 |
| YKR100C           | 1160.772 | 1189.575 | 1191.597 | 1230.322 | 1155.72  | 1214.237 | 0.023568 | 983.7428 | 1077.307 |
| YLR285C- <i>f</i> | 40.3046  | 25.70985 | 43.4745  | 35.81724 | 40.32922 | 17.61182 | -0.22377 | 16.86416 | 16.68202 |
| YJR112W- <i>f</i> | 839.4872 | 667.4673 | 653.1056 | 676.9459 | 737.4486 | 668.2709 | -0.05264 | 646.4596 | 497.8266 |
| YHR188C           | 1551.151 | 1744.315 | 1617.449 | 1694.156 | 1826.338 | 1667.253 | 0.078529 | 1945     | 2088.765 |
| YCR090C           | 865.9731 | 732.7308 | 778.5888 | 801.4108 | 906.8313 | 749.481  | 0.048003 | 628.4711 | 693.6208 |
| YIL063C           | 1690.49  | 1516.881 | 1622.389 | 1625.207 | 1434.568 | 1414.817 | -0.1102  | 1837.069 | 1850.826 |
| YDR357C           | 259.101  | 221.5003 | 237.1336 | 261.4659 | 276.5432 | 240.6949 | 0.117624 | 216.9856 | 194.9162 |
| YHL002W           | 1043.313 | 891.9341 | 888.2631 | 813.0514 | 829.6297 | 797.4243 | -0.21055 | 957.8844 | 1028.139 |
| YIL109C           | 3082.726 | 3446.109 | 3598.503 | 3619.332 | 3758.683 | 4658.328 | 0.249142 | 3995.682 | 4711.354 |
| YLR401C           | 1457.875 | 1784.857 | 1427.742 | 1841.006 | 1760.659 | 1690.735 | 0.180353 | 2001.214 | 2115.105 |
| YBL041W           | 4311.44  | 4076     | 4155.767 | 4227.33  | 4047.902 | 3764.038 | -0.05916 | 5101.971 | 4611.262 |
| YKL031W           | 28.789   | 23.73217 | 11.85668 | 23.28121 | 9.218108 | 18.59026 | -0.33354 | 33.72832 | 29.85204 |
| YMR149W           | 4364.412 | 4083.911 | 4406.733 | 4585.502 | 4907.49  | 4422.525 | 0.114359 | 3841.656 | 3792.965 |
| YDR322C- <i>f</i> | 2092.384 | 1650.375 | 1857.547 | 1712.96  | 1737.613 | 1649.641 | -0.13495 | 1769.613 | 1590.938 |
| YKR106W           | 2.30312  | 5.933043 | 3.952227 | 3.581724 | 0        | 0.978435 | -1.41835 | 0        | 0        |
| YMR124W           | 837.1841 | 705.0432 | 853.6811 | 820.2148 | 775.4733 | 972.5641 | 0.100214 | 966.8786 | 1126.475 |
| YGL139W           | 1150.408 | 1184.631 | 1221.238 | 1202.564 | 1334.321 | 1559.625 | 0.204027 | 1351.382 | 1590.06  |
| YNL322C           | 4867.644 | 4963.979 | 4959.057 | 5497.051 | 5158.684 | 4556.57  | 0.04055  | 4379.061 | 4123.093 |
| YPR121W           | 226.8573 | 207.6565 | 217.3725 | 180.8771 | 210.8642 | 246.5655 | -0.03037 | 102.3093 | 169.4542 |
| YGL256W           | 3029.754 | 3117.814 | 2988.872 | 2645.103 | 2616.79  | 2469.569 | -0.24089 | 2911.879 | 2813.993 |
| YGL243W           | 446.8053 | 489.476  | 490.0762 | 480.8465 | 518.5186 | 444.2094 | 0.01731  | 394.6214 | 375.7845 |
| YLR070C           | 133.581  | 227.4333 | 195.6353 | 168.341  | 147.4897 | 178.0751 | -0.17253 | 152.9017 | 151.0162 |

|         |          |          |          |          |          |          |          |          |          |
|---------|----------|----------|----------|----------|----------|----------|----------|----------|----------|
| YLL009C | 1257.503 | 1190.564 | 1079.946 | 1070.936 | 981.7285 | 962.7798 | -0.22649 | 1216.468 | 895.5611 |
| YLR064W | 1386.478 | 1478.316 | 1365.495 | 1545.514 | 1591.276 | 1250.44  | 0.052554 | 1047.827 | 1174.765 |
| YNL325C | 204.9777 | 267.9758 | 259.8589 | 237.2892 | 265.0206 | 186.881  | -0.08854 | 128.1676 | 161.5522 |
| YCL034W | 2222.511 | 2264.445 | 2144.083 | 2106.949 | 1903.539 | 1914.797 | -0.16235 | 2436.309 | 2347.775 |
| YNL224C | 541.2332 | 574.5163 | 547.3835 | 543.5266 | 561.1523 | 688.818  | 0.108872 | 670.0694 | 830.589  |
| YIL150C | 97.88259 | 133.4935 | 85.96094 | 83.27509 | 85.2675  | 93.92973 | -0.27385 | 102.3093 | 143.9922 |
| YKL078W | 846.3966 | 1059.048 | 949.5226 | 1103.171 | 1238.683 | 1330.671 | 0.363298 | 993.8613 | 918.3891 |
| YJL103C | 200.3714 | 135.4711 | 201.5636 | 151.3278 | 141.7284 | 136.9809 | -0.32155 | 286.6908 | 227.4023 |
| YNL128W | 39.15304 | 65.26347 | 52.36701 | 74.32078 | 73.74486 | 62.61982 | 0.426317 | 23.60983 | 24.58403 |
| YML068W | 232.6151 | 279.8418 | 312.226  | 230.1258 | 263.8683 | 274.9402 | -0.10098 | 475.5694 | 377.5405 |
| YNL284C | 1414.116 | 1547.535 | 1489.99  | 1228.531 | 1206.42  | 1142.812 | -0.31528 | 1396.353 | 1174.765 |
| YDR427W | 2030.2   | 1933.183 | 2087.764 | 1956.517 | 2080.988 | 1798.363 | -0.05226 | 2584.714 | 2242.415 |
| YML010W | 1073.254 | 1168.809 | 1343.757 | 1356.578 | 1477.202 | 2214.198 | 0.493402 | 1337.89  | 2095.789 |
| YDR245W | 3901.485 | 3651.788 | 3823.78  | 4182.558 | 4150.453 | 4241.514 | 0.144377 | 3550.468 | 3468.982 |
| YHR088W | 2092.384 | 2162.594 | 2100.609 | 2615.554 | 2654.815 | 2662.321 | 0.319785 | 2179.974 | 2173.931 |
| YNL122C | 734.6952 | 688.2329 | 682.7473 | 762.0118 | 667.1605 | 675.12   | -0.00095 | 628.4711 | 661.1348 |
| YGR135W | 4268.833 | 3716.062 | 4034.236 | 3927.36  | 4089.383 | 3988.1   | -0.00172 | 5353.809 | 4496.244 |
| YDR334W | 1037.556 | 1003.673 | 1156.026 | 949.1569 | 1079.671 | 1456.889 | 0.124622 | 1396.353 | 1501.382 |
| YCR010C | 39.15304 | 33.62057 | 28.65365 | 27.75836 | 23.04527 | 38.15895 | -0.18917 | 12.36705 | 22.82803 |
| YBR080C | 1484.361 | 1581.156 | 1807.156 | 1592.972 | 1595.885 | 1905.991 | 0.064326 | 2013.581 | 1938.626 |
| YGL145W | 686.3297 | 630.8802 | 694.6039 | 676.9459 | 627.9836 | 833.6264 | 0.08814  | 780.2486 | 912.2431 |
| YJL097W | 1515.453 | 1595.988 | 1659.935 | 1650.279 | 1803.292 | 1487.221 | 0.050337 | 1262.564 | 1269.59  |
| YPR022C | 680.5719 | 603.1927 | 762.7799 | 813.0514 | 834.2388 | 1044.968 | 0.395627 | 473.3208 | 593.5287 |
| YGR241C | 1551.151 | 1344.823 | 1463.312 | 1246.44  | 1141.893 | 1178.035 | -0.28964 | 1509.905 | 1597.084 |
| YNL084C | 1912.741 | 1620.709 | 1530.5   | 1549.096 | 1648.889 | 1703.455 | -0.04706 | 2215.951 | 1964.966 |
| YGR162W | 5958.171 | 5698.687 | 7293.835 | 7124.945 | 7695.968 | 10605.25 | 0.424063 | 8119.532 | 10262.95 |
| YML096W | 666.7532 | 717.8982 | 773.6485 | 763.8027 | 776.6256 | 768.0713 | 0.09706  | 950.0145 | 918.3891 |
| YMR139W | 1021.434 | 882.0457 | 1016.71  | 760.2209 | 846.9136 | 832.6479 | -0.25931 | 1118.656 | 1161.595 |
| YFR040W | 591.9018 | 609.1257 | 679.7831 | 680.5276 | 613.0042 | 740.6751 | 0.113112 | 726.2833 | 938.5831 |
| YER149C | 330.4977 | 304.5629 | 394.2347 | 398.4668 | 296.1317 | 362.9993 | 0.039134 | 421.6041 | 419.6845 |
| YBR038W | 955.7947 | 1282.526 | 1227.167 | 1263.453 | 1269.794 | 1445.148 | 0.199128 | 1354.754 | 1610.254 |
| YLR099C | 1720.431 | 2404.86  | 1623.377 | 1867.869 | 1455.309 | 1159.445 | -0.35888 | 1038.832 | 1019.359 |
| YOR182C | 6058.357 | 4734.568 | 4935.344 | 5616.143 | 5671.441 | 5996.826 | 0.136112 | 6025.003 | 5162.646 |
| YMR069W | 100.1857 | 142.393  | 85.96094 | 88.64767 | 107.1605 | 79.25321 | -0.25631 | 28.10694 | 69.36208 |
| YOL013C | 525.1113 | 513.2082 | 532.5626 | 472.7876 | 525.4321 | 455.9506 | -0.11138 | 576.7543 | 578.6027 |
| YHR032W | 2975.631 | 3766.493 | 3701.261 | 4241.657 | 4292.181 | 4564.398 | 0.326783 | 2895.015 | 3051.932 |
| YGR066C | 184.2496 | 250.1766 | 226.265  | 102.9746 | 97.94239 | 111.5416 | -1.08031 | 139.4104 | 118.5301 |
| YDL101C | 742.7562 | 640.7686 | 771.6724 | 652.7692 | 694.8149 | 891.354  | 0.054995 | 902.7948 | 820.931  |
| YBL079W | 1500.483 | 1604.888 | 1581.879 | 1759.522 | 1745.679 | 2094.829 | 0.256693 | 1258.066 | 1416.216 |
| YGR278W | 579.2346 | 443.9894 | 645.2011 | 630.3834 | 573.8272 | 629.1335 | 0.135991 | 381.1301 | 495.1926 |
| YDL106C | 508.9895 | 422.2349 | 521.694  | 440.5521 | 506.9959 | 620.3276 | 0.109857 | 554.2688 | 622.5028 |
| YKRO20W | 587.2956 | 526.0631 | 529.5985 | 498.7551 | 532.3457 | 482.3683 | -0.11844 | 665.5723 | 696.2549 |
| YHR170W | 3583.655 | 3687.386 | 3631.109 | 4158.382 | 4171.194 | 4212.161 | 0.202125 | 3846.153 | 3649.85  |
| YPL180W | 747.3624 | 707.0209 | 810.2066 | 708.2859 | 640.6585 | 861.0225 | -0.03523 | 901.6705 | 946.4852 |
| YDL161W | 1347.325 | 1379.432 | 1339.805 | 1574.168 | 1516.379 | 1489.178 | 0.171451 | 1593.101 | 1660.3   |
| YCR067C | 1099.74  | 1280.548 | 1298.307 | 1296.584 | 1319.342 | 1543.97  | 0.177393 | 1409.844 | 1713.858 |
| YDR510W | 3372.919 | 2814.24  | 3142.021 | 2880.602 | 2957.86  | 2804.194 | -0.11028 | 4012.546 | 3755.211 |
| YMR200W | 2077.414 | 2292.132 | 2241.901 | 2368.415 | 2246.914 | 2139.837 | 0.031025 | 1882.04  | 1894.726 |
| YEL015W | 1820.616 | 1934.172 | 1856.559 | 1862.497 | 1978.436 | 2352.157 | 0.142312 | 2304.769 | 2275.779 |
| YDR027C | 808.3951 | 652.6347 | 725.2337 | 724.4037 | 697.1194 | 836.5617 | 0.046632 | 875.8122 | 921.9011 |
| YMR144W | 711.664  | 665.4896 | 762.7799 | 699.3316 | 618.7655 | 625.2198 | -0.13904 | 403.6156 | 514.5086 |
| YDR354W | 1098.588 | 1002.684 | 973.236  | 976.0198 | 816.9548 | 822.8636 | -0.23308 | 1133.272 | 1108.037 |
| YPL074W | 462.9271 | 526.0631 | 530.5865 | 483.5328 | 502.3869 | 667.2925 | 0.121602 | 596.9913 | 673.4268 |
| YER022W | 677.1172 | 652.6347 | 809.2185 | 728.8809 | 739.7531 | 969.6288 | 0.188937 | 971.3757 | 1014.091 |

|         |          |          |          |          |          |          |          |          |          |
|---------|----------|----------|----------|----------|----------|----------|----------|----------|----------|
| YDR308C | 861.3668 | 706.0321 | 667.9264 | 710.9722 | 743.2099 | 665.3356 | -0.07675 | 709.4191 | 581.2367 |
| YOL019W | 1566.122 | 1689.928 | 1739.968 | 1824.888 | 1895.473 | 1800.32  | 0.144068 | 1597.598 | 2028.182 |
| YDR075W | 710.5125 | 848.4251 | 862.5736 | 739.626  | 800.8231 | 832.6479 | -0.02914 | 676.815  | 640.0628 |
| YLR343W | 104.792  | 114.7055 | 85.96094 | 82.37965 | 72.5926  | 70.4473  | -0.43836 | 79.8237  | 58.82607 |
| YNL169C | 1680.126 | 2030.089 | 1954.376 | 1849.96  | 1789.465 | 1800.32  | -0.05843 | 1515.526 | 1374.072 |
| YGR044C | 510.1411 | 527.052  | 524.6582 | 481.7419 | 480.4939 | 505.8507 | -0.08932 | 632.9682 | 571.5787 |
| YOR292C | 229.1604 | 272.92   | 231.2053 | 242.6618 | 235.0617 | 203.5144 | -0.10622 | 341.7804 | 258.1323 |
| YIL154C | 1410.661 | 1387.343 | 1050.304 | 1341.356 | 1158.025 | 1088.019 | -0.10129 | 1629.078 | 1510.162 |
| YBL004W | 2308.878 | 2154.683 | 2362.444 | 2843.889 | 2914.074 | 3490.077 | 0.438106 | 2120.387 | 2549.715 |
| YLR464W | 1.15156  | 1.977681 | 1.976114 | 1.790862 | 0        | 7.827478 | 0.913777 | 0        | 0        |
| YNL075W | 1798.737 | 2031.078 | 1905.962 | 2430.2   | 2322.963 | 2305.192 | 0.299343 | 1967.486 | 1783.22  |
| YDR307W | 534.3238 | 654.6124 | 550.3477 | 646.5012 | 589.9589 | 653.5944 | 0.119934 | 441.841  | 466.2186 |
| YPL047W | 544.6879 | 623.9583 | 584.9296 | 576.6576 | 584.1976 | 457.9074 | -0.11541 | 465.4509 | 412.6605 |
| YJR068W | 1540.787 | 1238.028 | 1396.124 | 1363.741 | 1438.025 | 1388.399 | 0.005252 | 1723.517 | 1770.928 |
| YNR022C | 1354.234 | 1253.85  | 1275.581 | 1313.597 | 1250.206 | 1105.631 | -0.08186 | 1224.338 | 1120.329 |
| YKR092C | 6764.263 | 7704.056 | 7413.39  | 8383.025 | 8007.079 | 7406.751 | 0.121045 | 5856.361 | 6592.032 |
| YML101C | 834.881  | 758.4406 | 785.5052 | 791.561  | 818.1071 | 606.6295 | -0.1021  | 672.3179 | 677.8168 |
| YDR144C | 1859.769 | 2119.085 | 2073.931 | 2240.368 | 2320.659 | 2443.151 | 0.210617 | 2474.535 | 2711.267 |
| YAL059W | 652.9345 | 626.9248 | 518.7298 | 721.7174 | 680.9877 | 605.6511 | 0.159149 | 654.3295 | 519.7766 |
| YGL236C | 617.2361 | 779.2063 | 479.2076 | 600.8342 | 520.8231 | 499.0017 | -0.21081 | 413.7341 | 450.4146 |
| YML047W | 9.21248  | 4.944202 | 3.952227 | 11.6406  | 13.82716 | 5.870608 | 0.791231 | 5.621387 | 1.756002 |
| YBL044W | 9.21248  | 13.84377 | 7.904455 | 10.74517 | 5.761317 | 8.805912 | -0.29059 | 4.49711  | 7.024009 |
| YFL020C | 21.87964 | 19.77681 | 14.82085 | 10.74517 | 10.37037 | 17.61182 | -0.54432 | 56.21387 | 18.43802 |
| YAR002W | 2140.75  | 2114.141 | 2361.456 | 2274.395 | 2416.296 | 2722.005 | 0.163964 | 2661.165 | 2639.271 |
| YOR275C | 727.7859 | 611.1034 | 763.7679 | 644.7103 | 719.0124 | 801.338  | 0.042194 | 888.1792 | 891.1711 |
| YNL301C | 5699.07  | 5811.415 | 5637.852 | 6410.391 | 5979.095 | 5241.475 | 0.040042 | 7669.821 | 7061.763 |
| YCR072C | 1358.841 | 1739.37  | 1576.939 | 1786.385 | 1885.103 | 1763.139 | 0.217169 | 1414.341 | 1338.952 |
| YCR033W | 1225.26  | 1222.207 | 1460.348 | 1233.904 | 1275.556 | 1838.479 | 0.15397  | 1577.361 | 1928.09  |
| YJR050W | 609.1752 | 502.3309 | 465.3748 | 494.2779 | 489.712  | 487.2605 | -0.10003 | 601.4885 | 611.9667 |
| YIR012W | 3227.823 | 3851.533 | 3488.829 | 4154.8   | 3684.939 | 3746.427 | 0.132676 | 3080.52  | 3205.582 |
| YPL006W | 1125.074 | 1157.932 | 1179.74  | 1025.269 | 1062.387 | 1229.892 | -0.0618  | 957.8844 | 877.1231 |
| YGL228W | 3056.24  | 3089.138 | 3512.542 | 3172.512 | 3302.387 | 3722.944 | 0.07848  | 3656.15  | 3824.573 |
| YML023C | 758.878  | 744.5968 | 756.8515 | 735.1489 | 830.782  | 673.1631 | -0.01362 | 614.9798 | 562.7987 |
| YOR171C | 895.9136 | 924.5658 | 1039.436 | 1088.844 | 962.14   | 1268.051 | 0.214792 | 1108.538 | 1258.176 |
| YGR159C | 11994.65 | 12079.67 | 11109.71 | 14020.66 | 13206.09 | 11992.67 | 0.156647 | 12343.44 | 10516.7  |
| YMR231W | 495.1708 | 483.543  | 643.225  | 509.5003 | 601.4815 | 702.5161 | 0.161056 | 725.159  | 721.7169 |
| YLR133W | 637.9642 | 717.8982 | 866.5258 | 628.5926 | 701.7285 | 738.7182 | -0.10315 | 844.3324 | 803.371  |
| YDR294C | 2526.523 | 2625.371 | 2529.425 | 2684.502 | 2649.054 | 2289.537 | -0.01098 | 1948.373 | 2043.987 |
| YPL184C | 1627.154 | 1618.732 | 1771.586 | 1781.012 | 1849.383 | 1741.614 | 0.098501 | 1617.835 | 1449.58  |
| YDL013W | 594.2049 | 695.1548 | 653.1056 | 619.6383 | 599.177  | 632.0688 | -0.06967 | 670.0694 | 687.4748 |
| YHR209W | 345.468  | 281.8195 | 375.4616 | 269.5247 | 362.963  | 317.9913 | -0.07723 | 222.6069 | 234.4263 |
| YJL133W | 1194.168 | 1276.593 | 1289.414 | 1224.95  | 1277.86  | 1155.531 | -0.03961 | 1054.572 | 963.1672 |
| YBR053C | 1323.142 | 1252.861 | 1304.235 | 1341.356 | 1276.708 | 1212.281 | -0.01867 | 1172.621 | 1073.795 |
| YMR259C | 1136.59  | 1171.776 | 1257.796 | 1245.545 | 1395.391 | 1621.266 | 0.257227 | 968.0029 | 1146.669 |
| YPR040W | 886.7012 | 791.0723 | 725.2337 | 805.8879 | 831.9342 | 724.0417 | -0.02492 | 976.9971 | 973.7032 |
| YIL067C | 391.5304 | 346.0942 | 371.5094 | 393.0942 | 377.9424 | 335.6031 | -0.00325 | 455.3324 | 488.1686 |
| YBL059W | 318.9821 | 294.6744 | 264.7992 | 258.7796 | 314.5679 | 225.04   | -0.13788 | 216.9856 | 200.1842 |
| YNL115C | 1011.07  | 1160.899 | 1054.257 | 950.9477 | 982.8807 | 915.8149 | -0.17907 | 722.9104 | 825.321  |
| YNL133C | 513.5957 | 525.0743 | 576.0371 | 459.3561 | 538.107  | 358.1071 | -0.25237 | 353.0231 | 332.7624 |
| YML038C | 1186.107 | 1334.935 | 1147.134 | 1245.545 | 1194.897 | 1134.984 | -0.03695 | 978.1214 | 971.9472 |
| YDL201W | 2029.049 | 1942.083 | 1897.069 | 2397.964 | 2122.469 | 2065.476 | 0.166465 | 1914.645 | 1712.98  |
| YNL181W | 1021.434 | 1004.662 | 931.7376 | 1053.027 | 1000.165 | 1003.874 | 0.047607 | 1250.197 | 1188.813 |
| YPL233W | 358.1351 | 415.313  | 440.6733 | 376.9765 | 339.9177 | 383.5464 | -0.14183 | 198.9971 | 278.3263 |
| YDR106W | 35.69836 | 51.4197  | 37.54616 | 45.66698 | 53.00412 | 44.02956 | 0.194945 | 23.60983 | 26.34003 |

|                   |          |          |          |          |          |          |          |          |          |
|-------------------|----------|----------|----------|----------|----------|----------|----------|----------|----------|
| YOR134W           | 32.24368 | 93.93984 | 64.22369 | 30.44465 | 23.04527 | 31.30991 | -1.16695 | 73.07804 | 88.67811 |
| YMR319C           | 1927.711 | 1940.105 | 1962.281 | 1770.267 | 1867.819 | 1760.204 | -0.11102 | 1496.413 | 1343.342 |
| YNL277W- <i>f</i> | 6.90936  | 16.81029 | 11.85668 | 5.372586 | 8.065844 | 1.956869 | -1.20843 | 15.73988 | 24.58403 |
| YPLO46C           | 468.6849 | 433.1121 | 407.0794 | 433.3886 | 388.3128 | 318.9697 | -0.19845 | 362.0173 | 320.4704 |
| YOL117W           | 193.4621 | 146.3484 | 174.8861 | 133.4192 | 135.9671 | 213.2988 | -0.09264 | 188.8786 | 261.6443 |
| YPR116W           | 84.06388 | 85.04028 | 91.88928 | 65.36646 | 80.65844 | 80.23165 | -0.20605 | 40.47399 | 48.29006 |
| YLRO99W- <i>f</i> | 656.3892 | 586.3824 | 573.073  | 573.0759 | 493.1688 | 449.1015 | -0.26099 | 543.026  | 480.2666 |
| YJL118W           | 285.5869 | 296.6521 | 269.7395 | 281.1653 | 218.9301 | 212.3203 | -0.2581  | 205.7428 | 169.4542 |
| YJR100C           | 692.0875 | 792.0612 | 715.3531 | 652.7692 | 609.5474 | 625.2198 | -0.22067 | 620.6012 | 541.7267 |
| YJLO25W           | 777.303  | 960.1641 | 916.9167 | 923.1894 | 956.3787 | 901.1384 | 0.067074 | 730.7804 | 712.0589 |
| YKRO58W           | 414.5616 | 279.8418 | 310.2498 | 220.276  | 223.5391 | 260.2636 | -0.51289 | 408.1127 | 360.8584 |
| YDL164C           | 738.1499 | 741.6303 | 741.0426 | 878.4178 | 739.7531 | 863.9579 | 0.160484 | 829.7168 | 921.0231 |
| YER189W           | 0        | 0        | 0.988057 | 0        | 0        | 0        | #NUM!    | 1.124277 | 4.390005 |
| YDR275W           | 466.3818 | 560.6725 | 556.276  | 514.8728 | 525.4321 | 429.5328 | -0.10731 | 447.4624 | 446.0245 |
| YDR471W           | 19254.08 | 15585.11 | 17387.82 | 19472.04 | 18951.28 | 17460.17 | 0.097626 | 18374.07 | 15655.64 |
| YILO43C           | 4987.406 | 4793.898 | 5057.863 | 5366.318 | 5523.951 | 5172.984 | 0.114354 | 4907.471 | 3978.223 |
| YILO34C           | 2744.167 | 2594.717 | 2561.043 | 2697.038 | 2457.778 | 2481.31  | -0.049   | 3321.116 | 2893.014 |
| YDR448W           | 498.6255 | 648.6793 | 613.5833 | 529.1997 | 540.4116 | 525.4194 | -0.14272 | 462.078  | 354.7124 |
| YJR032W           | 731.2406 | 821.7264 | 719.3054 | 822.9011 | 1003.621 | 768.0713 | 0.191373 | 965.7544 | 904.3411 |
| YBR168W           | 313.2243 | 317.4178 | 351.7482 | 323.2506 | 364.1153 | 233.8459 | -0.09276 | 229.3526 | 216.8663 |
| YKL051W           | 1195.319 | 1349.767 | 1146.146 | 978.7061 | 1232.922 | 973.5425 | -0.21273 | 987.1156 | 859.5631 |
| YOL057W           | 1840.193 | 1780.902 | 1727.123 | 1637.743 | 1845.926 | 1808.147 | -0.0153  | 1933.757 | 2049.255 |
| YLR190W           | 1582.243 | 1528.747 | 1913.866 | 1796.235 | 1879.342 | 2266.055 | 0.241777 | 2085.535 | 2454.013 |
| YCR071C           | 1043.313 | 901.8225 | 884.3109 | 867.6727 | 828.4774 | 707.4083 | -0.23535 | 883.6821 | 766.4949 |
| YOR314W           | 13.81872 | 29.66521 | 34.58199 | 26.86293 | 19.58848 | 25.4393  | -0.11889 | 14.61561 | 8.780011 |
| YDR425W           | 135.8841 | 137.4488 | 206.5039 | 120.8832 | 164.7737 | 172.2045 | -0.06763 | 203.4942 | 176.4782 |
| YAL031C           | 351.2258 | 355.9826 | 380.4019 | 264.1522 | 298.4362 | 359.0855 | -0.23883 | 360.8931 | 515.3866 |
| YDR100W           | 674.8141 | 464.755  | 494.0284 | 395.7805 | 422.8807 | 396.2661 | -0.42718 | 431.7226 | 362.6144 |
| YIL148W           | 29166.71 | 22823.43 | 24671.78 | 26300.6  | 28165.93 | 25465.72 | 0.060268 | 27495.33 | 22830.66 |
| YGL165C           | 16.12184 | 16.81029 | 18.77308 | 8.058879 | 11.52263 | 7.827478 | -0.91566 | 7.869942 | 6.146008 |
| YOR307C           | 1646.731 | 1757.169 | 1644.127 | 1800.712 | 1696.132 | 1736.722 | 0.052075 | 1394.104 | 1466.262 |
| YKL063C           | 2044.019 | 1794.745 | 1986.982 | 2171.42  | 2125.926 | 1842.393 | 0.075734 | 1653.812 | 1626.936 |
| YGR139W           | 1.15156  | 1.977681 | 7.904455 | 9.849741 | 9.218108 | 6.849043 | 1.231977 | 7.869942 | 9.658012 |
| YNLO49C           | 864.8215 | 850.4028 | 1052.281 | 960.7975 | 1061.235 | 1320.887 | 0.272523 | 1179.367 | 1192.325 |
| YDL008W           | 779.6061 | 626.9248 | 579.0013 | 673.3641 | 599.177  | 632.0688 | -0.06003 | 510.422  | 486.4126 |
| YGR216C           | 596.508  | 737.675  | 606.6669 | 604.4159 | 576.1317 | 629.1335 | -0.10095 | 468.8237 | 463.5846 |
| YOR293C- <i>f</i> | 52.97176 | 35.59826 | 36.5581  | 51.03957 | 39.17696 | 27.39617 | -0.08936 | 75.32659 | 81.6541  |
| YHR101C           | 495.1708 | 410.3688 | 450.5539 | 478.1602 | 433.2511 | 483.3467 | 0.040558 | 336.159  | 324.8604 |
| YGR133W           | 555.0519 | 553.7506 | 562.2043 | 504.1277 | 462.0577 | 435.4034 | -0.25365 | 435.0954 | 419.6845 |
| YBR081C           | 1045.616 | 1048.171 | 1209.382 | 1001.987 | 1058.93  | 1320.887 | 0.033942 | 1238.954 | 1415.338 |
| YMR194C- <i>f</i> | 304.0118 | 318.4066 | 284.5604 | 239.0801 | 206.2552 | 184.9242 | -0.52512 | 216.9856 | 193.1602 |
| YFRO25C           | 1001.857 | 1036.305 | 1073.03  | 961.6929 | 1013.992 | 915.8149 | -0.10565 | 769.0058 | 767.3729 |
| YDL054C           | 419.1678 | 478.5988 | 412.0197 | 486.219  | 480.4939 | 350.2796 | 0.007916 | 493.5578 | 536.4587 |
| YDR321W           | 2504.643 | 2516.599 | 2328.85  | 2546.606 | 2532.675 | 2326.718 | 0.010932 | 3164.841 | 2755.167 |
| YNL281W           | 3529.531 | 3072.327 | 3219.089 | 3408.01  | 3295.474 | 2925.52  | -0.02848 | 4520.72  | 3776.283 |
| YHR150W           | 323.5883 | 435.0898 | 419.9242 | 316.9826 | 329.5474 | 391.3739 | -0.1834  | 456.4567 | 504.8506 |
| YJL184W           | 1433.692 | 1074.87  | 1287.438 | 1322.552 | 1222.552 | 1174.122 | -0.02948 | 996.1098 | 1046.577 |
| YOR381W           | 240.676  | 335.2169 | 274.6798 | 212.2172 | 191.2757 | 214.2772 | -0.46136 | 424.9769 | 374.9065 |
| YMR291W           | 160.0668 | 170.0806 | 206.5039 | 163.8639 | 162.4691 | 126.2181 | -0.2459  | 261.9567 | 194.0382 |
| YOR164C           | 1255.2   | 1289.448 | 1388.22  | 1296.584 | 1413.827 | 1433.407 | 0.075379 | 1198.48  | 1013.213 |
| YGR282C           | 17099.51 | 18034.47 | 18283    | 18580.19 | 18985.85 | 17921.99 | 0.054878 | 17096.89 | 16066.54 |
| YMR113W           | 687.4813 | 789.0947 | 790.4455 | 786.1884 | 788.1482 | 729.9123 | 0.023499 | 683.5607 | 537.3367 |
| YML069W           | 2349.182 | 1926.261 | 2177.677 | 2227.832 | 2280.329 | 2651.558 | 0.149906 | 2559.98  | 2599.761 |
| YJLO05W           | 2314.635 | 1939.116 | 2380.229 | 2022.779 | 2210.041 | 3135.883 | 0.151536 | 2855.665 | 3209.972 |

|         |          |          |          |          |          |          |          |          |          |
|---------|----------|----------|----------|----------|----------|----------|----------|----------|----------|
| YOL015W | 118.6107 | 108.7724 | 53.35507 | 57.30759 | 77.20165 | 86.10225 | -0.34772 | 150.6532 | 126.4322 |
| YOR101W | 2082.02  | 2084.476 | 2158.904 | 2185.747 | 2162.799 | 2172.125 | 0.043864 | 1734.76  | 1698.932 |
| YDR020C | 582.6893 | 724.82   | 610.6191 | 636.6515 | 631.4404 | 710.3436 | 0.044661 | 474.4451 | 557.5307 |
| YCR092C | 444.5021 | 564.6279 | 521.694  | 500.5459 | 492.0165 | 710.3436 | 0.15369  | 662.1994 | 665.5248 |
| YMR300C | 2904.234 | 3860.433 | 2899.947 | 3424.128 | 3109.959 | 2973.463 | -0.02364 | 2467.789 | 2305.631 |
| YHR016C | 1174.591 | 1367.566 | 1232.107 | 967.0655 | 1025.514 | 953.9738 | -0.35717 | 1036.584 | 966.6792 |
| YKR077W | 290.1931 | 350.0495 | 363.6049 | 318.7734 | 371.0288 | 322.8835 | 0.012646 | 376.633  | 439.0005 |
| YDR442W | 40.3046  | 43.50898 | 39.52227 | 34.02638 | 42.63375 | 44.02956 | -0.03129 | 21.36127 | 28.97404 |
| YIL020C | 745.0593 | 754.4853 | 724.2457 | 821.1103 | 619.9177 | 664.3572 | -0.07894 | 927.5289 | 863.0751 |
| YOR266W | 202.6745 | 233.3663 | 191.683  | 243.5572 | 278.8478 | 253.4146 | 0.305591 | 326.0405 | 287.9844 |
| YJL215C | 21.87964 | 31.64289 | 31.61782 | 42.08526 | 28.80659 | 18.59026 | 0.071756 | 13.49133 | 25.46203 |
| YMR230W | 11212.74 | 9761.833 | 10463.52 | 11522.41 | 11246.09 | 10609.17 | 0.086369 | 11541.83 | 9970.58  |
| YCR063W | 148.5512 | 205.6788 | 157.101  | 136.1055 | 197.0371 | 155.5711 | -0.06527 | 110.1792 | 116.7741 |
| YAL035W | 5211.96  | 5099.45  | 5902.651 | 6207.128 | 6186.503 | 8002.618 | 0.331058 | 6894.069 | 7853.72  |
| YKL176C | 1024.888 | 1112.445 | 1048.328 | 1123.766 | 1100.412 | 1185.863 | 0.098196 | 820.7226 | 983.3612 |
| YBR137W | 1004.16  | 925.5546 | 992.0091 | 923.1894 | 972.5104 | 856.1304 | -0.08643 | 1485.171 | 1083.453 |
| YDR403W | 25.33432 | 60.31927 | 59.28341 | 53.72586 | 42.63375 | 33.26678 | -0.16107 | 31.47977 | 8.780011 |
| YFR030W | 792.2732 | 1136.178 | 1019.675 | 857.8229 | 967.9013 | 840.4754 | -0.14501 | 830.8411 | 943.8512 |
| YIL164C | 56.42644 | 88.99564 | 80.0326  | 89.5431  | 82.96297 | 76.31791 | 0.142288 | 37.10116 | 48.29006 |
| YER027C | 1330.052 | 1381.41  | 1531.488 | 1415.676 | 1473.745 | 1585.064 | 0.076654 | 1759.494 | 1673.47  |
| YDR151C | 761.1811 | 765.3625 | 748.9471 | 880.2087 | 760.4939 | 708.3867 | 0.045924 | 934.2746 | 1015.847 |
| YLL019C | 709.3609 | 766.3513 | 827.9916 | 693.0636 | 823.8684 | 865.9147 | 0.048731 | 546.3989 | 732.2529 |
| YNL196C | 48.36552 | 51.4197  | 44.46256 | 87.75224 | 64.52675 | 33.26678 | 0.363226 | 92.19075 | 101.8481 |
| YPL245W | 1570.728 | 1672.129 | 1513.703 | 1826.679 | 1736.461 | 1745.528 | 0.158431 | 1490.792 | 1363.536 |
| YDL220C | 133.581  | 131.5158 | 135.3638 | 178.1908 | 130.2058 | 191.7732 | 0.320758 | 170.8902 | 211.5983 |
| YHL020C | 3087.332 | 3597.401 | 3054.084 | 3673.058 | 3167.572 | 2847.245 | -0.00757 | 2357.61  | 2468.939 |
| YBR228W | 447.9568 | 450.9112 | 345.8199 | 393.9897 | 407.9013 | 366.913  | -0.09075 | 337.2832 | 313.4464 |
| YDR129C | 4458.84  | 4443.849 | 4708.091 | 4087.643 | 4269.136 | 4644.63  | -0.06608 | 5080.61  | 5192.498 |
| YOR179C | 583.8409 | 598.2485 | 552.3238 | 573.9713 | 515.0618 | 485.3036 | -0.1397  | 511.5463 | 454.8046 |
| YLL058W | 800.3342 | 1013.561 | 777.6007 | 886.4767 | 761.6462 | 633.0473 | -0.18401 | 532.9075 | 554.8967 |
| YGL247W | 298.254  | 294.6744 | 291.4768 | 261.4659 | 256.9548 | 231.889  | -0.23722 | 218.1098 | 251.1083 |
| YPL144W | 476.7458 | 405.4246 | 374.4735 | 453.9835 | 410.2058 | 350.2796 | -0.04925 | 337.2832 | 273.0583 |
| YFL048C | 1822.919 | 1742.337 | 1827.905 | 1821.307 | 1870.124 | 1865.875 | 0.043254 | 1634.699 | 1531.234 |
| YLR241W | 990.3415 | 1036.305 | 935.6898 | 1027.955 | 939.0947 | 1310.124 | 0.145717 | 1231.084 | 1181.789 |
| YNL268W | 2776.411 | 3438.198 | 2895.006 | 3264.742 | 2924.445 | 2635.903 | -0.04578 | 3316.619 | 3413.668 |
| YKL091C | 416.8647 | 354.0049 | 385.3422 | 368.9176 | 313.4157 | 303.3148 | -0.23026 | 577.8786 | 503.0946 |
| YNL164C | 608.0236 | 621.9806 | 551.3357 | 677.8413 | 583.0453 | 579.2334 | 0.046837 | 463.2023 | 478.5106 |
| YMR130W | 938.5214 | 843.4809 | 869.49   | 889.163  | 888.3951 | 895.2678 | 0.011561 | 718.4133 | 788.445  |
| YKL183C | 43.75928 | 42.52014 | 27.66559 | 33.13095 | 34.5679  | 36.20208 | -0.13313 | 20.23699 | 27.21803 |
| YBR063C | 279.8291 | 246.2213 | 279.6201 | 334.8912 | 329.5474 | 318.9697 | 0.287601 | 451.9595 | 408.2705 |
| YML011C | 371.9539 | 452.8889 | 392.2586 | 325.9369 | 360.6585 | 315.056  | -0.28107 | 326.0405 | 254.6203 |
| YGR104C | 619.5392 | 582.427  | 634.3325 | 620.5337 | 624.5268 | 647.7238 | 0.043709 | 494.6821 | 445.1465 |
| YGL257C | 798.031  | 909.7332 | 917.9048 | 848.8686 | 920.6585 | 910.9227 | 0.02979  | 1189.486 | 974.5812 |
| YOL134C | 1.15156  | 3.955362 | 0        | 1.790862 | 5.761317 | 0.978435 | 0.740196 | 0        | 0        |
| YNL211C | 175.0371 | 160.1922 | 136.3518 | 119.0923 | 108.3128 | 123.2828 | -0.42732 | 110.1792 | 90.43411 |
| YBR171W | 1275.928 | 1172.765 | 1326.96  | 1364.637 | 1433.416 | 1215.216 | 0.088051 | 1713.399 | 1605.864 |
| YNL294C | 612.6299 | 691.1995 | 582.9535 | 587.4028 | 616.461  | 625.2198 | -0.04481 | 766.7572 | 762.9829 |
| YOL011W | 556.2035 | 708.9986 | 598.7624 | 628.5926 | 589.9589 | 599.7805 | -0.03576 | 649.8324 | 710.3029 |
| YOR097C | 550.4457 | 526.0631 | 541.4551 | 470.1013 | 492.0165 | 422.6838 | -0.2245  | 430.5983 | 381.9305 |
| YOL056W | 499.777  | 599.2373 | 498.9687 | 441.4475 | 493.1688 | 389.417  | -0.27131 | 598.1156 | 562.7987 |
| YHR067W | 354.6805 | 380.7036 | 381.3899 | 345.6364 | 307.6543 | 346.3659 | -0.15983 | 278.8208 | 253.7423 |
| YHR004C | 588.4471 | 584.4047 | 671.8786 | 519.35   | 520.8231 | 562.6    | -0.20284 | 619.4769 | 654.9888 |
| YMR012W | 4541.752 | 4054.246 | 4948.189 | 4883.681 | 5128.725 | 6568.232 | 0.291826 | 5836.124 | 6659.638 |
| YJR007W | 5603.491 | 5794.605 | 5124.063 | 5676.137 | 5544.692 | 4907.829 | -0.03478 | 5007.532 | 4607.75  |

|           |          |          |          |          |          |          |          |          |          |
|-----------|----------|----------|----------|----------|----------|----------|----------|----------|----------|
| YOR308C   | 249.8885 | 259.0762 | 343.8438 | 285.6425 | 254.6502 | 464.7565 | 0.236972 | 409.237  | 432.8545 |
| YOR250C   | 601.1143 | 676.3669 | 589.8699 | 540.8403 | 602.6338 | 510.7429 | -0.17484 | 418.2312 | 452.1706 |
| YOR014W   | 1193.016 | 1320.102 | 1536.428 | 1327.029 | 1579.753 | 1914.797 | 0.251745 | 1636.948 | 1981.648 |
| YHL034C   | 3589.412 | 3951.406 | 4469.969 | 4093.015 | 3892.346 | 4351.099 | 0.038598 | 4837.766 | 4744.718 |
| YOR050C   | 103.6404 | 97.8952  | 97.81763 | 100.2883 | 101.3992 | 123.2828 | 0.118459 | 70.82948 | 57.94807 |
| YOL098C   | 1851.708 | 1702.783 | 1852.607 | 1847.274 | 2013.004 | 2482.289 | 0.230212 | 2166.483 | 2361.823 |
| YOL081W   | 1964.561 | 1675.096 | 1808.144 | 1567.9   | 1561.317 | 1881.53  | -0.12065 | 1571.74  | 1500.504 |
| YJR065C   | 3901.485 | 3783.303 | 4051.033 | 3819.909 | 3658.437 | 3656.411 | -0.07585 | 4403.795 | 4404.053 |
| YOL020W   | 1789.524 | 2652.07  | 1990.935 | 2010.243 | 2147.819 | 1968.611 | -0.07028 | 1569.491 | 1561.086 |
| YPR062W   | 3878.454 | 3466.875 | 3600.479 | 3830.654 | 3701.07  | 3188.719 | -0.03001 | 3562.835 | 2840.333 |
| YPL217C   | 3362.555 | 3326.459 | 3667.667 | 4113.61  | 4132.017 | 5178.855 | 0.374305 | 3047.916 | 3561.172 |
| YGL070C   | 1013.373 | 943.3538 | 973.236  | 1030.641 | 952.9219 | 907.009  | -0.01953 | 960.133  | 755.9589 |
| YFR003C   | 1196.471 | 979.9409 | 1327.948 | 1093.321 | 959.8355 | 922.6639 | -0.23586 | 1436.827 | 1271.346 |
| YJL154C   | 1403.752 | 1230.117 | 1330.913 | 1270.617 | 1231.77  | 1425.579 | -0.01346 | 1364.873 | 1579.524 |
| YHL009C   | 570.0222 | 614.0699 | 565.1685 | 572.1804 | 642.963  | 680.9906 | 0.116316 | 453.0838 | 521.5326 |
| YCR019W   | 365.0445 | 391.5808 | 428.8167 | 432.4932 | 391.7696 | 346.3659 | -0.01814 | 492.4335 | 487.2906 |
| YPL273W   | 6898.996 | 6364.177 | 6935.171 | 6877.806 | 6826.009 | 6658.248 | 0.011647 | 6130.685 | 5908.069 |
| YHR157W   | 29.94056 | 33.62057 | 51.37895 | 51.03957 | 29.95885 | 58.70608 | 0.281496 | 28.10694 | 17.56002 |
| YLR459W   | 724.3312 | 831.6148 | 698.5562 | 830.0646 | 890.6997 | 795.4674 | 0.158456 | 603.737  | 662.8908 |
| YNR012W   | 863.67   | 1103.546 | 1001.89  | 1225.845 | 1093.498 | 998.0034 | 0.160001 | 843.2081 | 813.029  |
| YGR004W   | 430.6834 | 675.378  | 595.7983 | 556.9581 | 634.8972 | 564.5568 | 0.045519 | 419.3555 | 454.8046 |
| YHR070C-1 | 199.2199 | 166.1252 | 164.0174 | 194.3085 | 145.1852 | 145.7868 | -0.12544 | 104.5578 | 138.7242 |
| YFL016C   | 1342.719 | 1822.433 | 1458.372 | 1280.466 | 1149.959 | 941.2542 | -0.45553 | 1705.529 | 1811.316 |
| YML007W   | 1665.156 | 1663.23  | 1803.204 | 1444.33  | 1516.379 | 1746.506 | -0.12453 | 1706.653 | 1882.434 |
| YGL088W   | 27.63744 | 43.50898 | 13.8328  | 45.66698 | 25.3498  | 28.37461 | 0.226011 | 92.19075 | 78.1421  |
| YDR274C   | 108.2466 | 143.3819 | 119.5549 | 92.2294  | 101.3992 | 48.92174 | -0.61385 | 139.4104 | 117.6521 |
| YBR040W   | 13.81872 | 11.86609 | 5.928341 | 8.95431  | 12.6749  | 7.827478 | -0.10193 | 0        | 5.268006 |
| YBR213W   | 580.3862 | 788.1058 | 529.5985 | 507.7094 | 536.9548 | 445.1878 | -0.34938 | 296.8093 | 327.4944 |
| YHR105W   | 49.51708 | 132.5046 | 104.734  | 95.81112 | 64.52675 | 112.52   | -0.07167 | 112.4277 | 194.9162 |
| YAL061W   | 976.5228 | 862.2689 | 779.5768 | 453.9835 | 428.642  | 385.5033 | -1.04597 | 865.6937 | 833.223  |
| YDR512C   | 470.988  | 455.8554 | 414.9839 | 342.9501 | 440.1646 | 301.3579 | -0.30721 | 667.8208 | 524.1666 |
| YJL153C   | 224.5542 | 352.0272 | 261.8351 | 341.1592 | 280      | 293.5304 | 0.125615 | 202.3699 | 154.5282 |
| YDL242W   | 10.36404 | 21.75449 | 17.78502 | 12.53603 | 12.6749  | 18.59026 | -0.18817 | 21.36127 | 21.07203 |
| YGR251W   | 635.6611 | 624.9472 | 722.2695 | 874.8361 | 784.6914 | 770.0281 | 0.293097 | 566.6358 | 665.5248 |
| YLR238W   | 384.621  | 338.1834 | 330.999  | 322.3552 | 333.0041 | 299.401  | -0.1424  | 382.2543 | 411.7825 |
| YBR212W   | 685.1782 | 704.0544 | 738.0784 | 548.8992 | 576.1317 | 569.449  | -0.32819 | 640.8382 | 833.223  |
| YOL038W   | 3932.577 | 3752.649 | 3957.168 | 3983.773 | 3786.338 | 3422.565 | -0.05683 | 4444.269 | 4297.815 |
| YNL252C   | 1973.774 | 2042.944 | 1647.091 | 1768.476 | 1749.136 | 1471.566 | -0.18297 | 1669.552 | 1503.138 |
| YOR059C   | 753.1202 | 838.5367 | 642.2369 | 713.6585 | 667.1605 | 707.4083 | -0.09728 | 834.2139 | 790.201  |
| YNR056C   | 154.309  | 193.8127 | 140.3041 | 99.39284 | 124.4445 | 133.0671 | -0.4526  | 168.6416 | 251.9863 |
| YPR017C   | 553.9003 | 489.476  | 551.3357 | 474.5784 | 471.2758 | 462.7996 | -0.17898 | 394.6214 | 406.5145 |
| YNR040W   | 745.0593 | 652.6347 | 713.377  | 717.2403 | 557.6955 | 591.953  | -0.17734 | 620.6012 | 545.2387 |
| YDR188W   | 4647.696 | 5818.337 | 4499.611 | 5376.168 | 5178.272 | 4824.662 | 0.039317 | 3859.645 | 4223.185 |
| YPR125W   | 943.1276 | 1270.66  | 1117.492 | 1218.682 | 1094.65  | 1123.243 | 0.044895 | 837.5867 | 903.4631 |
| YHR135C   | 3640.081 | 3513.35  | 3491.793 | 3215.493 | 3501.729 | 3250.36  | -0.09489 | 3830.413 | 3957.151 |
| YLR042C   | 1476.3   | 1432.83  | 1465.288 | 1351.205 | 1538.272 | 1281.749 | -0.06862 | 1763.991 | 1596.206 |
| YLR212C   | 545.8394 | 619.0141 | 687.6876 | 622.3246 | 667.1605 | 807.2086 | 0.178611 | 754.3902 | 856.929  |
| YKL028W   | 1548.848 | 1704.761 | 1489.99  | 1457.762 | 1503.704 | 1643.77  | -0.04271 | 1865.176 | 1839.412 |
| YOL148C   | 712.8156 | 764.3737 | 772.6604 | 773.6524 | 668.3128 | 784.7046 | -0.01494 | 800.4856 | 995.6532 |
| YDR462W   | 1507.392 | 1312.191 | 1444.539 | 1304.643 | 1148.807 | 1010.723 | -0.29974 | 1146.763 | 1086.965 |
| YCR098C   | 62.18424 | 103.8282 | 75.09232 | 69.84362 | 73.74486 | 41.09426 | -0.38461 | 112.4277 | 122.0421 |
| YDL198C   | 2019.836 | 2194.237 | 2050.218 | 2141.871 | 2023.375 | 1937.301 | -0.03774 | 1864.052 | 1533.868 |
| YOR298C-1 | 7327.376 | 7254.133 | 7056.702 | 6196.383 | 5526.256 | 4646.586 | -0.4026  | 7649.584 | 7111.809 |
| YKR003W   | 1191.865 | 1118.379 | 1257.796 | 1103.171 | 1071.605 | 1165.316 | -0.09524 | 876.9364 | 822.687  |



|           |          |          |          |          |          |          |          |          |          |
|-----------|----------|----------|----------|----------|----------|----------|----------|----------|----------|
| YDL033C   | 398.4397 | 422.2349 | 434.745  | 404.7348 | 352.5926 | 320.9266 | -0.21947 | 254.0867 | 280.9603 |
| YMR047C   | 1969.167 | 1906.484 | 2265.614 | 1995.02  | 2002.634 | 2510.663 | 0.083749 | 2009.084 | 2907.94  |
| YBR150C   | 276.3744 | 257.0985 | 294.4409 | 223.8578 | 190.1235 | 267.1127 | -0.28163 | 301.3064 | 342.4204 |
| YLR296W   | 19.57652 | 14.83261 | 7.904455 | 2.686293 | 9.218108 | 5.870608 | -1.25127 | 1.124277 | 3.512004 |
| YIL111W   | 1725.037 | 1699.817 | 1627.33  | 1449.703 | 1349.301 | 1084.106 | -0.37969 | 1342.387 | 1125.597 |
| YOR114W   | 274.0713 | 298.6298 | 231.2053 | 232.8121 | 213.1687 | 262.2205 | -0.18287 | 321.5434 | 287.1064 |
| YKL047W   | 464.0787 | 388.6143 | 535.5268 | 427.1206 | 481.6461 | 517.592  | 0.039101 | 516.0434 | 577.7247 |
| YEL056W   | 1195.319 | 1182.653 | 1133.301 | 1130.034 | 940.247  | 993.1112 | -0.19686 | 1244.575 | 1266.078 |
| YJL111W   | 4516.418 | 4345.954 | 4475.897 | 4447.606 | 4930.535 | 4642.673 | 0.071999 | 5484.226 | 5087.138 |
| YOR056C   | 2852.414 | 2745.021 | 2376.277 | 3069.538 | 3048.889 | 2823.763 | 0.165377 | 2377.847 | 2367.091 |
| YMR214W   | 1816.01  | 1839.243 | 1874.344 | 2193.806 | 2172.017 | 1788.579 | 0.154444 | 2318.26  | 2285.437 |
| YDR364C   | 713.9672 | 765.3625 | 760.8038 | 840.8097 | 833.0865 | 925.5992 | 0.214647 | 611.6069 | 705.9129 |
| YDR172W   | 6247.213 | 6402.742 | 7118.949 | 7191.207 | 7329.548 | 9481.032 | 0.279909 | 7847.457 | 8969.659 |
| YNR038W   | 1195.319 | 1297.359 | 1261.749 | 1434.481 | 1588.971 | 1641.813 | 0.313367 | 1145.639 | 1188.813 |
| YNL067W-f | 2.30312  | 4.944202 | 5.928341 | 5.372586 | 2.304527 | 0.978435 | -0.60618 | 1.124277 | 0        |
| YOL004W   | 2207.54  | 1991.525 | 2248.817 | 2000.393 | 2125.926 | 2651.558 | 0.072008 | 2374.474 | 2709.511 |
| YFR005C   | 840.6388 | 935.4431 | 869.49   | 873.9407 | 813.498  | 885.4834 | -0.04017 | 701.5491 | 716.4489 |
| YFR035C   | 216.4933 | 155.2479 | 173.898  | 191.6222 | 160.1646 | 163.3986 | -0.08286 | 167.5173 | 122.0421 |
| YDR012W   | 31860.21 | 27454.17 | 25735.92 | 30156.33 | 29096.96 | 25003.9  | -0.01352 | 27337.93 | 23058.06 |
| YDR200C   | 213.0386 | 222.4891 | 314.2021 | 291.9105 | 307.6543 | 331.6894 | 0.312804 | 243.9682 | 406.5145 |
| YDR409W   | 451.4115 | 432.1233 | 433.7569 | 423.5389 | 425.1852 | 488.2389 | 0.021385 | 482.315  | 619.8688 |
| YER135C   | 63.3358  | 52.40854 | 48.41478 | 46.56241 | 72.5926  | 64.57669 | 0.162506 | 32.60405 | 25.46203 |
| YER161C   | 1035.252 | 1203.419 | 1099.707 | 1167.642 | 1015.144 | 1216.194 | 0.025955 | 1289.546 | 1287.15  |
| YPL268W   | 485.9583 | 346.0942 | 449.5659 | 490.6962 | 543.8684 | 462.7996 | 0.224458 | 544.1503 | 658.5008 |
| YDR079C-f | 191.1589 | 156.2368 | 172.9099 | 166.5502 | 192.428  | 211.3419 | 0.132412 | 315.922  | 270.4243 |
| YOR236W   | 1206.835 | 1132.222 | 1271.629 | 1328.82  | 1163.786 | 1108.567 | -0.00381 | 1686.416 | 1393.388 |
| YJL137C   | 462.9271 | 409.3799 | 407.0794 | 315.1917 | 391.7696 | 361.0424 | -0.26054 | 276.5723 | 288.8624 |
| YDR449C   | 1302.414 | 1331.968 | 1313.128 | 1709.378 | 1576.296 | 1426.558 | 0.255468 | 1261.439 | 1216.909 |
| YOR349W   | 406.5007 | 515.1859 | 510.8254 | 399.3622 | 511.605  | 525.4194 | 0.003897 | 414.8584 | 365.2484 |
| YLR104W   | 816.456  | 791.0723 | 903.0839 | 893.6402 | 1009.383 | 801.338  | 0.107248 | 726.2833 | 670.7928 |
| YIR011C   | 999.554  | 1092.669 | 1075.994 | 967.0655 | 1085.432 | 938.3189 | -0.08313 | 1286.173 | 1180.033 |
| YER170W   | 298.254  | 251.1655 | 295.429  | 225.6486 | 261.5638 | 263.1989 | -0.17101 | 329.4133 | 350.3224 |
| YER015W   | 149.7028 | 185.902  | 150.1846 | 151.3278 | 139.4239 | 114.4769 | -0.2616  | 185.5058 | 185.2582 |
| YPL250C   | 908.5808 | 1364.6   | 732.1501 | 806.7834 | 517.3663 | 357.1287 | -0.83797 | 409.237  | 402.1245 |
| YML064C   | 692.0875 | 624.9472 | 619.5116 | 540.8403 | 526.5844 | 557.7078 | -0.25293 | 453.0838 | 447.7805 |
| YLR456W   | 195.7652 | 166.1252 | 166.9816 | 144.1644 | 138.2716 | 103.7141 | -0.45376 | 240.5954 | 193.1602 |
| YDR302W   | 903.9746 | 831.6148 | 737.0904 | 861.4046 | 850.3704 | 685.8827 | -0.04445 | 753.2659 | 626.0148 |
| YIL163C   | 5.7578   | 19.77681 | 23.71336 | 6.268017 | 9.218108 | 8.805912 | -1.01958 | 32.60405 | 15.80402 |
| YHR163W   | 5131.351 | 4453.737 | 4720.936 | 5017.1   | 4618.272 | 4595.708 | -0.00758 | 4314.977 | 3806.135 |
| YLR068W   | 541.2332 | 566.6056 | 649.1533 | 749.4758 | 622.2223 | 643.81   | 0.198036 | 618.3526 | 575.9687 |
| YMR079W   | 4020.096 | 4351.887 | 4049.057 | 4083.165 | 4187.325 | 3851.119 | -0.0352  | 3612.304 | 3312.698 |
| YKR055W   | 266.0103 | 288.7414 | 286.5365 | 298.1785 | 217.7778 | 286.6814 | -0.06785 | 335.0347 | 326.6164 |
| YPL249C-f | 149.7028 | 147.3372 | 109.6743 | 147.7461 | 157.8601 | 106.6494 | 0.019523 | 107.9306 | 69.36208 |
| YNR077C   | 0        | 0        | 0        | 0        | 0        | 0        | #DIV/0!  | 2.248555 | 1.756002 |
| YBL098W   | 427.2287 | 443.0005 | 447.5897 | 451.2972 | 463.2099 | 507.8076 | 0.110089 | 636.3411 | 635.6728 |
| YAL041W   | 1364.599 | 1291.426 | 1280.522 | 1358.369 | 1402.305 | 1655.512 | 0.16587  | 1407.595 | 1689.274 |
| YDR135C   | 2498.885 | 2226.869 | 2551.163 | 2678.234 | 2602.963 | 3002.816 | 0.187003 | 2109.145 | 2227.489 |
| YPR083W   | 404.1975 | 376.7482 | 397.1988 | 376.9765 | 360.6585 | 395.2876 | -0.05647 | 473.3208 | 419.6845 |
| YNR075W   | 81.76076 | 85.04028 | 73.11621 | 84.17052 | 80.65844 | 88.05912 | 0.075962 | 78.69942 | 102.7261 |
| YLR361C   | 495.1708 | 516.1747 | 580.9774 | 501.4414 | 541.5638 | 590.9746 | 0.037257 | 392.3728 | 359.9804 |
| YGL144C   | 336.2555 | 307.5294 | 370.5213 | 321.4597 | 301.893  | 338.5384 | -0.07655 | 227.1041 | 200.1842 |
| YPL077C   | 163.5215 | 137.4488 | 169.9458 | 170.1319 | 150.9465 | 133.0671 | -0.05232 | 164.1445 | 213.3543 |
| YDR122W   | 944.2792 | 890.9452 | 840.8364 | 607.1022 | 675.2264 | 756.33   | -0.39249 | 784.7457 | 1040.431 |
| YKR072C   | 2024.442 | 1920.328 | 1876.32  | 1940.399 | 1859.753 | 1860.004 | -0.04045 | 1627.954 | 1639.228 |

|           |          |          |          |          |          |          |          |          |          |
|-----------|----------|----------|----------|----------|----------|----------|----------|----------|----------|
| YGL254W   | 207.2808 | 195.7904 | 210.4561 | 201.472  | 253.498  | 191.7732 | 0.076065 | 246.2168 | 273.0583 |
| YGL207W   | 2911.144 | 2605.595 | 3182.531 | 2839.412 | 3199.836 | 3695.548 | 0.162256 | 3395.318 | 3711.311 |
| YKR068C   | 1412.964 | 1277.582 | 1201.477 | 1186.446 | 1321.646 | 1112.48  | -0.1043  | 1133.272 | 1090.477 |
| YLR051C   | 1934.621 | 1986.58  | 1923.747 | 2304.839 | 2169.712 | 2201.478 | 0.1918   | 2018.078 | 1680.494 |
| YBR154C   | 4349.442 | 4100.721 | 4046.093 | 4862.19  | 4562.963 | 4315.876 | 0.136994 | 4131.72  | 3827.207 |
| YKL197C   | 565.4159 | 654.6124 | 559.2402 | 509.5003 | 527.7367 | 584.1255 | -0.13408 | 397.9942 | 433.7325 |
| YER060W   | 966.1588 | 1105.524 | 965.3315 | 933.0391 | 1037.037 | 1015.615 | -0.02459 | 770.1301 | 843.759  |
| YKL179C   | 1194.168 | 1068.937 | 1292.378 | 1165.851 | 1181.07  | 1668.231 | 0.175409 | 1581.858 | 1459.238 |
| YDR468C   | 1105.498 | 1082.78  | 1124.409 | 1031.537 | 995.5556 | 1022.464 | -0.1194  | 999.4827 | 830.589  |
| YDR513W   | 2572.585 | 2441.447 | 2235.973 | 2213.505 | 2218.107 | 2038.08  | -0.16428 | 2294.65  | 1934.236 |
| YPR166C   | 579.2346 | 583.4159 | 549.3596 | 594.5662 | 667.1605 | 535.2038 | 0.069843 | 672.3179 | 461.8286 |
| YMR177W   | 491.7161 | 463.7662 | 482.1717 | 522.0363 | 471.2758 | 561.6215 | 0.113136 | 499.1792 | 561.9207 |
| YJR090C   | 875.1856 | 779.2063 | 842.8125 | 783.5021 | 792.7573 | 967.6719 | 0.026746 | 864.5694 | 1065.893 |
| YDR511W   | 977.6744 | 811.838  | 890.2392 | 791.561  | 748.9713 | 757.3085 | -0.22182 | 829.7168 | 692.7428 |
| YNL182C   | 2090.081 | 2140.84  | 2458.285 | 2611.077 | 2626.008 | 2522.405 | 0.214127 | 2058.552 | 2098.423 |
| YDR356W   | 624.1455 | 396.525  | 523.6701 | 640.2332 | 670.6173 | 924.6208 | 0.533588 | 820.7226 | 762.9829 |
| YOL131W   | 4.60624  | 3.955362 | 4.940284 | 3.581724 | 3.45679  | 4.892174 | -0.17848 | 12.36705 | 15.80402 |
| YDR126W   | 413.41   | 279.8418 | 320.1304 | 347.4272 | 399.8354 | 321.905  | 0.07731  | 225.9798 | 222.1343 |
| YPL162C   | 525.1113 | 553.7506 | 531.5746 | 524.7226 | 574.9795 | 423.6622 | -0.08019 | 675.6908 | 628.6488 |
| YLR250W   | 1601.82  | 1631.587 | 1448.491 | 1685.201 | 1653.498 | 1455.911 | 0.03432  | 2142.873 | 1973.746 |
| YHR098C   | 2178.751 | 2015.257 | 2061.087 | 2142.766 | 2076.379 | 2375.639 | 0.076294 | 2410.451 | 2497.035 |
| YKL138C-I | 628.7517 | 514.197  | 520.7059 | 479.0556 | 618.7655 | 492.1527 | -0.06535 | 484.5636 | 433.7325 |
| YNL185C   | 982.2806 | 834.5813 | 793.4096 | 768.2798 | 755.8848 | 683.9259 | -0.2414  | 781.3728 | 695.3769 |
| YFR008W   | 337.4071 | 341.1499 | 367.5571 | 371.6039 | 349.1358 | 318.9697 | -0.00886 | 299.0578 | 191.4042 |
| YGR296W   | 1.15156  | 0.98884  | 2.96417  | 3.581724 | 0        | 0.978435 | -0.16271 | 4.49711  | 10.53601 |
| YNL310C   | 1138.893 | 938.4096 | 1031.531 | 936.6209 | 910.2881 | 852.2166 | -0.20388 | 1229.96  | 1176.521 |
| YJR131W   | 762.3327 | 738.6638 | 705.4726 | 774.5478 | 704.033  | 739.6966 | 0.0077   | 623.974  | 570.7007 |
| YMR031C   | 2933.023 | 2896.314 | 3259.599 | 2502.73  | 2628.313 | 3281.67  | -0.11154 | 3250.286 | 3694.629 |
| YNL067W-I | 3.45468  | 4.944202 | 0        | 0        | 0        | 4.892174 | -0.77972 | 0        | 0        |
| YCL056C   | 322.4368 | 357.9602 | 301.3573 | 296.3877 | 311.1111 | 213.2988 | -0.25834 | 267.578  | 233.5483 |
| YPL258C   | 203.8261 | 194.8016 | 215.3964 | 205.0537 | 125.5967 | 200.5791 | -0.20896 | 134.9133 | 139.6022 |
| YGL203C   | 1241.382 | 1244.95  | 1320.044 | 1186.446 | 1376.955 | 1283.706 | 0.015356 | 1079.306 | 1055.357 |
| YLR225C   | 815.3044 | 910.722  | 962.3673 | 801.4108 | 821.5639 | 823.842  | -0.13584 | 993.8613 | 878.0011 |
| YOR130C   | 712.8156 | 648.6793 | 561.2163 | 665.3053 | 675.2264 | 444.2094 | -0.10743 | 453.0838 | 435.4885 |
| YDR466W   | 502.0801 | 539.9069 | 617.5355 | 480.8465 | 587.6544 | 732.8476 | 0.118309 | 549.7717 | 811.273  |
| YMR192W   | 523.9598 | 574.5163 | 593.8222 | 650.0829 | 536.9548 | 619.3492 | 0.094123 | 704.922  | 619.8688 |
| YCL002C   | 626.4486 | 701.0879 | 589.8699 | 647.3966 | 613.0042 | 550.8587 | -0.08216 | 483.4393 | 520.6546 |
| YPL216W   | 398.4397 | 417.2907 | 511.8134 | 390.4079 | 459.7531 | 559.6647 | 0.086757 | 257.4595 | 346.8104 |
| YOR148C   | 450.2599 | 508.264  | 428.8167 | 376.081  | 470.1235 | 403.1151 | -0.15118 | 366.5145 | 395.9785 |
| YDR415C   | 735.8468 | 832.6036 | 683.7353 | 778.1296 | 808.889  | 732.8476 | 0.042716 | 600.3642 | 575.0907 |
| YNL232W   | 1750.371 | 1871.875 | 1771.586 | 1954.726 | 1954.239 | 1918.71  | 0.11161  | 1719.02  | 1627.814 |
| YMR018W   | 41.45616 | 43.50898 | 41.49839 | 37.6081  | 26.50206 | 25.4393  | -0.49796 | 20.23699 | 13.17002 |
| YLR454W   | 1497.028 | 1271.649 | 1584.843 | 1412.99  | 1587.819 | 1877.616 | 0.164233 | 1189.486 | 1254.664 |
| YNL291C   | 718.5734 | 670.4338 | 744.9948 | 752.1621 | 848.0659 | 802.3165 | 0.171002 | 965.7544 | 894.6831 |
| YKL032C   | 2262.815 | 2280.266 | 2457.297 | 2490.194 | 2630.617 | 2850.18  | 0.187326 | 2509.387 | 2950.084 |
| YMR193W   | 1320.839 | 1182.653 | 1275.581 | 1232.113 | 1202.963 | 1119.329 | -0.08842 | 1237.83  | 1181.789 |
| YJR002W   | 2928.417 | 2917.079 | 3026.418 | 3797.523 | 3569.712 | 4162.261 | 0.378012 | 3988.936 | 4138.897 |
| YPR085C   | 627.6002 | 672.4115 | 496.0045 | 555.1672 | 625.6791 | 573.3627 | -0.03398 | 523.9133 | 427.5865 |
| YGR120C   | 732.3921 | 705.0432 | 714.3651 | 750.3712 | 728.2305 | 624.2413 | -0.0332  | 603.737  | 586.5047 |
| YDR002W   | 10889.15 | 9374.207 | 10677.93 | 11626.28 | 10710.29 | 10381.19 | 0.080541 | 13631.86 | 12405.28 |
| YAL010C   | 274.0713 | 249.1878 | 294.4409 | 292.8059 | 277.6955 | 280.8108 | 0.058117 | 338.4075 | 336.2744 |
| YMR272W-I | 8.06092  | 0        | 0.988057 | 0        | 2.304527 | 2.935304 | -0.78823 | 0        | 0        |
| YMR137C   | 356.9836 | 263.0316 | 275.6679 | 265.943  | 263.8683 | 336.5815 | -0.04797 | 151.7775 | 205.4523 |
| YAL021C   | 2136.144 | 2288.177 | 2398.014 | 2379.16  | 2518.848 | 2933.347 | 0.198997 | 2546.488 | 2822.773 |

|           |          |          |          |          |          |          |          |          |          |
|-----------|----------|----------|----------|----------|----------|----------|----------|----------|----------|
| YEL016C   | 330.4977 | 459.8108 | 329.0229 | 334.8912 | 329.5474 | 388.4386 | -0.0883  | 490.185  | 465.3406 |
| YLR406C   | 13815.26 | 11236.19 | 12841.77 | 13654.43 | 13866.34 | 12444.71 | 0.076814 | 13248.49 | 11631.76 |
| YAR014C   | 1385.327 | 1532.703 | 1472.205 | 1526.71  | 1559.012 | 1476.458 | 0.055426 | 1524.52  | 1800.78  |
| YPR204W   | 6.90936  | 6.921883 | 13.8328  | 7.163448 | 10.37037 | 9.784347 | -0.01815 | 8.99422  | 21.95003 |
| YHR152W   | 1146.954 | 988.8404 | 1042.4   | 1137.197 | 1176.461 | 998.9818 | 0.059774 | 1359.251 | 1297.686 |
| YLR097C   | 437.5928 | 465.7438 | 428.8167 | 465.6241 | 494.321  | 381.5895 | 0.010124 | 647.5838 | 528.5566 |
| YCL052C   | 931.612  | 885.0122 | 971.2599 | 929.4574 | 894.1565 | 920.7071 | -0.02272 | 1129.899 | 1034.285 |
| YLR390W   | 503.2317 | 443.9894 | 482.1717 | 437.8658 | 453.9918 | 361.0424 | -0.19013 | 433.9711 | 417.9285 |
| YDL134C   | 1985.289 | 1824.411 | 1941.532 | 1911.745 | 1955.391 | 1850.22  | -0.00852 | 1742.63  | 1662.934 |
| YBR056W   | 1574.182 | 1578.189 | 1575.951 | 1464.925 | 1293.992 | 1395.248 | -0.18677 | 1448.069 | 1201.983 |
| YPR019W   | 847.5481 | 872.1573 | 827.0036 | 796.9336 | 988.6421 | 1036.162 | 0.14795  | 1073.685 | 1100.135 |
| YPL190C   | 1251.746 | 1521.825 | 1732.064 | 1549.096 | 1648.889 | 2059.605 | 0.222671 | 1602.095 | 2114.227 |
| YNL337W   | 0        | 0        | 0        | 0        | 0        | 0        | #DIV/0!  | 0        | 5.268006 |
| YHR204W   | 1083.618 | 1329.99  | 1136.265 | 1180.178 | 1288.231 | 1086.063 | 0.001867 | 852.2023 | 946.4852 |
| YDR247W   | 102.4888 | 133.4935 | 121.531  | 120.8832 | 103.7037 | 106.6494 | -0.11014 | 147.2803 | 153.6502 |
| YCR024C-f | 6470.615 | 6240.572 | 5961.935 | 6365.619 | 6873.252 | 5201.359 | -0.01811 | 6267.847 | 5428.681 |
| YBL073W   | 1.15156  | 14.83261 | 0.988057 | 8.95431  | 8.065844 | 8.805912 | 0.605652 | 0        | 0        |
| YEL002C   | 4023.55  | 3466.875 | 3858.362 | 3829.758 | 3792.099 | 3942.113 | 0.027099 | 4733.208 | 4231.087 |
| YDR213W   | 432.9865 | 432.1233 | 474.2673 | 428.9115 | 390.6173 | 547.9234 | 0.029928 | 496.9306 | 590.8947 |
| YPL264C   | 101.3373 | 144.3707 | 132.3996 | 108.3472 | 102.5514 | 124.2612 | -0.17395 | 69.7052  | 82.5321  |
| YBR047W   | 125.52   | 113.7166 | 132.3996 | 105.6609 | 96.79013 | 86.10225 | -0.36505 | 127.0434 | 64.97208 |
| YLL002W   | 267.1619 | 251.1655 | 291.4768 | 275.7928 | 240.8231 | 296.4657 | 0.005827 | 304.6792 | 304.6664 |
| YIL127C   | 1971.471 | 1923.295 | 1825.929 | 2401.546 | 2159.342 | 2029.274 | 0.204124 | 1776.358 | 1888.58  |
| YNL165W   | 536.6269 | 401.4692 | 499.9568 | 480.8465 | 473.5803 | 446.1662 | -0.03808 | 610.4827 | 567.1887 |
| YER066W   | 160.0668 | 139.4265 | 162.0413 | 187.1451 | 125.5967 | 126.2181 | -0.07235 | 96.68786 | 97.45812 |
| YNR006W   | 1021.434 | 812.8268 | 865.5378 | 867.6727 | 887.2429 | 913.858  | -0.01667 | 959.0087 | 1040.431 |
| YPL128C   | 1000.706 | 1214.296 | 1039.436 | 1153.315 | 1243.292 | 1268.051 | 0.171271 | 928.6532 | 986.8732 |
| YDR017C   | 1053.677 | 1139.144 | 1229.143 | 1190.028 | 1137.284 | 1666.274 | 0.22286  | 1370.494 | 1586.548 |
| YDL240W   | 460.624  | 414.3241 | 567.1446 | 463.8333 | 457.4486 | 682.9474 | 0.153716 | 570.0087 | 721.7169 |
| YPL239W   | 2424.034 | 2413.759 | 2330.826 | 2664.803 | 2555.72  | 2162.341 | 0.042485 | 3151.35  | 2817.505 |
| YJR139C   | 5384.694 | 5210.2   | 5070.708 | 5504.215 | 5155.227 | 4608.428 | -0.0371  | 4870.37  | 4106.411 |
| YOL031C   | 1188.41  | 1101.568 | 1275.581 | 1361.951 | 1386.173 | 1367.852 | 0.207106 | 1309.783 | 1402.168 |
| YJR158W   | 0        | 1.977681 | 5.928341 | 0        | 2.304527 | 1.956869 | -0.89163 | 0        | 0        |
| YMR032W   | 657.5407 | 620.003  | 661.01   | 736.9397 | 732.8396 | 770.0281 | 0.208394 | 730.7804 | 823.565  |
| YBR193C   | 550.4457 | 537.9292 | 524.6582 | 502.3368 | 521.9754 | 473.5624 | -0.10686 | 638.5896 | 637.4288 |
| YNL177C   | 1476.3   | 1450.629 | 1497.894 | 1378.068 | 1342.387 | 1191.733 | -0.17764 | 1267.061 | 1184.423 |
| YIL068C   | 587.2956 | 487.4983 | 630.3803 | 604.4159 | 574.9795 | 846.346  | 0.248531 | 665.5723 | 714.6929 |
| YGL033W   | 3.45468  | 21.75449 | 15.80891 | 18.80405 | 18.43622 | 18.59026 | 0.444794 | 6.745665 | 1.756002 |
| YJL089W   | 41.45616 | 58.34159 | 75.09232 | 34.92181 | 33.41564 | 17.61182 | -1.02489 | 12.36705 | 14.04802 |
| YPR199C   | 686.3297 | 769.3179 | 715.3531 | 667.0961 | 772.0165 | 634.0257 | -0.06654 | 600.3642 | 588.2607 |
| YNR063W   | 74.8514  | 83.0626  | 91.88928 | 83.27509 | 93.33334 | 123.2828 | 0.263647 | 94.43931 | 158.9182 |
| YDR234W   | 2633.618 | 3406.555 | 2758.655 | 3283.546 | 3086.914 | 3059.565 | 0.09995  | 2240.685 | 2371.481 |
| YLR124W   | 12.66716 | 10.87724 | 28.65365 | 11.6406  | 19.58848 | 17.61182 | -0.09591 | 30.35549 | 25.46203 |
| YPL112C   | 1175.743 | 1294.392 | 1236.059 | 1361.951 | 1330.864 | 1269.03  | 0.096234 | 1470.555 | 1489.09  |
| YDR080W   | 278.6775 | 314.4513 | 372.4974 | 334.8912 | 375.6379 | 354.1934 | 0.140941 | 403.6156 | 510.1186 |
| YPR131C   | 787.667  | 889.9564 | 862.5736 | 981.3924 | 860.7408 | 778.834  | 0.045159 | 761.1359 | 667.2808 |
| YJR064W   | 4272.287 | 4450.771 | 4387.96  | 4646.392 | 4763.457 | 5019.37  | 0.138213 | 5656.24  | 4994.07  |
| YLR424W   | 432.9865 | 468.7104 | 460.4345 | 474.5784 | 512.7572 | 626.1982 | 0.244358 | 290.0636 | 372.2725 |
| YLR189C   | 1180.349 | 1234.073 | 1273.605 | 1196.296 | 1145.35  | 1296.426 | -0.01968 | 789.2428 | 950.8752 |
| YOL149W   | 849.8512 | 825.6818 | 1007.818 | 879.3133 | 882.6338 | 800.3596 | -0.06659 | 1145.639 | 981.6052 |
| YCL033C   | 718.5734 | 756.4629 | 638.2847 | 643.8149 | 676.3787 | 595.8667 | -0.14137 | 1007.353 | 858.6851 |
| YLR412C-f | 2.30312  | 3.955362 | 2.96417  | 10.74517 | 0        | 1.956869 | 0.461807 | 12.36705 | 5.268006 |
| YIL158W   | 1122.771 | 1037.294 | 1155.038 | 1242.858 | 1288.231 | 1016.594 | 0.097823 | 1566.119 | 1328.416 |
| YNL167C   | 648.3282 | 636.8132 | 729.1859 | 699.3316 | 697.1194 | 727.9554 | 0.076762 | 778      | 915.7551 |

|           |          |          |          |          |          |          |          |          |          |
|-----------|----------|----------|----------|----------|----------|----------|----------|----------|----------|
| YNL282W   | 329.3461 | 476.6211 | 451.542  | 492.4871 | 486.2552 | 463.7781 | 0.198023 | 283.3179 | 339.7864 |
| YDR103W   | 756.5749 | 801.9496 | 806.2544 | 858.7184 | 939.0947 | 975.4994 | 0.229905 | 1023.093 | 947.3632 |
| YBL099W   | 6372.733 | 6658.851 | 6410.513 | 6124.748 | 6204.939 | 5769.83  | -0.10323 | 6481.46  | 6238.198 |
| YPL107W   | 742.7562 | 776.2397 | 712.389  | 711.8677 | 592.2634 | 604.6727 | -0.22527 | 590.2457 | 502.2166 |
| YDR312W   | 1175.743 | 1150.021 | 1237.047 | 1321.656 | 1318.189 | 1452.976 | 0.20008  | 1089.425 | 1115.939 |
| YPR079W   | 802.6373 | 703.0655 | 699.5442 | 720.822  | 789.3005 | 601.7373 | -0.06243 | 773.5029 | 843.759  |
| YOR046C   | 2641.679 | 2930.923 | 2919.708 | 3143.858 | 3090.371 | 3265.037 | 0.161659 | 3701.121 | 3297.772 |
| YJR124C   | 915.4902 | 1143.1   | 848.7408 | 1075.413 | 936.7902 | 746.5457 | -0.07568 | 771.2544 | 762.1049 |
| YMR230W-I | 0        | 4.944202 | 0        | 1.790862 | 2.304527 | 1.956869 | 0.291736 | 5.621387 | 5.268006 |
| YPL159C   | 1270.171 | 1448.651 | 1239.023 | 1109.439 | 1106.173 | 992.1328 | -0.30316 | 1082.679 | 945.6072 |
| YLR298C   | 541.2332 | 546.8288 | 551.3357 | 539.0495 | 553.0865 | 493.1311 | -0.04844 | 648.7081 | 645.3308 |
| YPR156C   | 586.144  | 797.9942 | 641.2489 | 769.1753 | 783.5392 | 625.2198 | 0.104763 | 519.4162 | 530.3126 |
| YJR135W-I | 920.0964 | 699.1102 | 756.8515 | 649.1875 | 805.4322 | 814.0577 | -0.06672 | 816.2254 | 683.9628 |
| YKL114C   | 928.1573 | 1136.178 | 1061.173 | 1010.046 | 1056.626 | 876.6775 | -0.08663 | 923.0318 | 880.6351 |
| YOL110W   | 596.508  | 756.4629 | 509.8373 | 688.5865 | 564.6091 | 466.7134 | -0.11515 | 447.4624 | 352.0784 |
| YHR019C   | 10473.44 | 9949.712 | 9960.601 | 10930.53 | 10649.22 | 10507.41 | 0.078696 | 11540.71 | 11859.16 |
| YER118C   | 1247.139 | 1327.024 | 1292.378 | 1480.147 | 1473.745 | 1431.45  | 0.181646 | 1609.965 | 1561.964 |
| YBR005W   | 1016.827 | 1129.256 | 821.0752 | 859.6138 | 750.1235 | 569.449  | -0.44529 | 1254.694 | 991.2632 |
| YNR037C   | 1125.074 | 1025.428 | 970.2718 | 899.9082 | 958.6832 | 890.3756 | -0.18301 | 1002.856 | 820.053  |
| YDL066W   | 1597.214 | 1951.971 | 1758.741 | 1777.431 | 1648.889 | 1409.924 | -0.13426 | 2139.5   | 2035.206 |
| YCR064C   | 3.45468  | 8.899564 | 13.8328  | 8.058879 | 10.37037 | 10.76278 | 0.156722 | 10.1185  | 0        |
| YLR126C   | 456.0177 | 480.5765 | 373.4855 | 417.2709 | 414.8148 | 374.7405 | -0.11844 | 625.0983 | 572.4567 |
| YNL247W   | 4175.556 | 4056.223 | 4377.092 | 4621.32  | 4397.037 | 4743.451 | 0.126231 | 4715.22  | 5096.796 |
| YMR252C   | 460.624  | 419.2683 | 416.96   | 406.5257 | 382.5515 | 318.9697 | -0.227   | 344.0289 | 298.5204 |
| YLR157W-I | 0        | 3.955362 | 1.976114 | 2.686293 | 2.304527 | 0        | -0.24911 | 0        | 0        |
| YJR061W   | 530.8691 | 475.6322 | 465.3748 | 593.6708 | 467.819  | 615.4354 | 0.188162 | 623.974  | 602.3087 |
| YER076C   | 280.9806 | 327.3062 | 276.6559 | 245.3481 | 262.7161 | 212.3203 | -0.29682 | 190.0029 | 259.0103 |
| YPR138C   | 1031.798 | 1468.428 | 988.0568 | 981.3924 | 1091.194 | 777.8556 | -0.29133 | 774.6272 | 798.981  |
| YNL118C   | 2179.903 | 2166.549 | 2222.14  | 2018.302 | 2218.107 | 2440.216 | 0.023535 | 2308.142 | 2651.563 |
| YBR101C   | 1341.567 | 1447.662 | 1122.433 | 1236.59  | 1164.938 | 931.4698 | -0.23096 | 1627.954 | 1689.274 |
| YDR507C   | 1548.848 | 1302.303 | 1761.705 | 1648.489 | 1719.177 | 2196.586 | 0.270527 | 1656.061 | 2094.033 |
| YPR031W   | 731.2406 | 622.9695 | 699.5442 | 703.8088 | 606.0906 | 774.9203 | 0.021659 | 550.896  | 568.9447 |
| YIL138C   | 2481.612 | 2351.463 | 2492.867 | 2461.54  | 2553.416 | 2478.375 | 0.032593 | 3085.017 | 2622.589 |
| YKL210W   | 3227.823 | 3033.762 | 3739.795 | 3281.755 | 3554.733 | 4207.269 | 0.143032 | 3647.156 | 4029.147 |
| YGR191W   | 2668.164 | 3059.472 | 2554.127 | 2819.712 | 2886.42  | 2729.833 | 0.026615 | 2519.506 | 2369.725 |
| YCR048W   | 811.8498 | 1089.702 | 919.8809 | 1021.687 | 1007.078 | 969.6288 | 0.087762 | 1032.087 | 1063.259 |
| YKL223W   | 2.30312  | 0        | 0        | 3.581724 | 0        | 3.913739 | 1.702428 | 0        | 0        |
| YPL189W   | 162.37   | 201.7234 | 176.8622 | 231.0212 | 209.712  | 189.8163 | 0.221099 | 112.4277 | 135.2122 |
| YDR541C   | 310.9212 | 339.1723 | 327.0468 | 301.7603 | 330.6996 | 370.8268 | 0.038096 | 368.763  | 409.1485 |
| YDR153C   | 2404.457 | 2352.451 | 2508.676 | 2495.566 | 2401.317 | 2395.208 | 0.005254 | 1916.893 | 2166.907 |
| YGR003W   | 475.5943 | 471.6769 | 475.2553 | 419.9572 | 445.926  | 544.9881 | -0.01187 | 535.1561 | 633.0388 |
| YJL004C   | 708.2094 | 692.1883 | 696.5801 | 661.7235 | 656.7902 | 555.7509 | -0.16199 | 562.1387 | 575.9687 |
| YLR360W   | 575.78   | 517.1635 | 497.9806 | 516.6637 | 503.5391 | 524.441  | -0.04259 | 429.474  | 371.3945 |
| YOR128C   | 4637.332 | 5211.189 | 4565.811 | 4927.557 | 4841.811 | 4552.657 | -0.00927 | 5090.728 | 4958.95  |
| YJL208C   | 1273.625 | 1359.656 | 1251.868 | 1290.316 | 1352.757 | 1190.755 | -0.01918 | 1119.78  | 1179.155 |
| YCR020C   | 188.8558 | 188.8685 | 171.9219 | 188.9359 | 207.4074 | 183.9457 | 0.078268 | 152.9017 | 127.3102 |
| YOL028C   | 388.0757 | 555.7283 | 540.4671 | 521.1409 | 549.6297 | 594.8883 | 0.166338 | 477.8179 | 732.2529 |
| YBR004C   | 621.8424 | 691.1995 | 517.7418 | 513.082  | 415.9671 | 429.5328 | -0.43036 | 473.3208 | 381.0525 |
| YML021C   | 553.9003 | 486.5095 | 522.6821 | 540.8403 | 488.5597 | 567.4921 | 0.030864 | 589.1214 | 639.1848 |
| YGL028C   | 241.8276 | 297.641  | 266.7753 | 214.9034 | 247.7366 | 295.4873 | -0.08878 | 194.5    | 166.8202 |
| YGL244W   | 2300.817 | 2076.565 | 2380.229 | 2433.782 | 2483.128 | 2674.062 | 0.167771 | 2608.324 | 2703.365 |
| YOR217W   | 681.7235 | 713.9428 | 907.0362 | 858.7184 | 812.3457 | 1312.081 | 0.373506 | 819.5983 | 1210.763 |
| YJR054W   | 672.511  | 623.9583 | 559.2402 | 589.1936 | 655.6379 | 693.7102 | 0.063001 | 727.4075 | 766.4949 |
| YLR276C   | 3686.143 | 3631.022 | 3735.843 | 4131.519 | 4243.786 | 4566.355 | 0.227584 | 3689.879 | 3253.872 |

|                   |          |          |          |          |          |          |          |          |          |
|-------------------|----------|----------|----------|----------|----------|----------|----------|----------|----------|
| YAR075W           | 0        | 3.955362 | 0        | 0        | 0        | 9.784347 | 1.306666 | 0        | 0        |
| YOL084W           | 80.6092  | 87.01796 | 45.45061 | 50.14414 | 39.17696 | 17.61182 | -0.99467 | 129.2919 | 131.7002 |
| YER056C- <i>f</i> | 19114.74 | 15117.39 | 16877.99 | 18002.64 | 18572.18 | 17456.25 | 0.08018  | 18971.06 | 16524.86 |
| YPR041W           | 6080.236 | 6272.215 | 6080.502 | 6947.649 | 6443.457 | 6762.941 | 0.128782 | 7627.098 | 7247.021 |
| YOR297C           | 572.3253 | 521.1189 | 519.7179 | 475.4739 | 523.1276 | 464.7565 | -0.14061 | 426.1012 | 470.6086 |
| YHL023C           | 617.2361 | 492.4425 | 719.3054 | 618.7428 | 607.2428 | 788.6184 | 0.139454 | 694.8035 | 851.661  |
| YNR052C           | 2012.927 | 2025.145 | 2298.22  | 2221.564 | 2080.988 | 2168.211 | 0.030297 | 2390.214 | 2325.825 |
| YGL091C           | 749.6655 | 785.1393 | 669.9025 | 770.0707 | 707.4898 | 635.9826 | -0.06092 | 853.3266 | 866.5871 |
| Q0045             | 3.45468  | 1.977681 | 0.988057 | 1.790862 | 6.913581 | 0        | 0.439085 | 8.99422  | 12.29202 |
| YMR227C           | 620.6908 | 662.5231 | 651.1294 | 620.5337 | 593.4157 | 556.7294 | -0.12754 | 706.0463 | 721.7169 |
| YDL208W           | 8770.28  | 8214.297 | 8543.727 | 10155.98 | 9823.046 | 8098.504 | 0.137318 | 8673.801 | 7794.016 |
| YJL140W           | 3643.536 | 2967.51  | 3528.351 | 3517.253 | 3149.136 | 3075.22  | -0.05774 | 3206.439 | 2624.345 |
| YMR086C- <i>f</i> | 34.5468  | 24.72101 | 29.6417  | 27.75836 | 18.43622 | 36.20208 | -0.10975 | 39.34971 | 50.92406 |
| YNL123W           | 1543.09  | 1830.344 | 1701.434 | 1799.816 | 1783.704 | 2050.799 | 0.150871 | 1196.231 | 1558.452 |
| YNL141W           | 3135.698 | 3711.118 | 3023.454 | 3920.197 | 4037.531 | 3266.015 | 0.185393 | 3296.382 | 3018.568 |
| YER133W           | 2877.748 | 3159.345 | 3216.125 | 3087.446 | 3328.889 | 3221.007 | 0.05868  | 3685.382 | 3663.02  |
| YOR093C           | 580.3862 | 543.8622 | 624.4519 | 595.4616 | 561.1523 | 839.497  | 0.190909 | 697.052  | 839.369  |
| YHR184W           | 78.30608 | 75.15187 | 43.4745  | 60.88931 | 82.96297 | 45.008   | -0.06038 | 49.46821 | 47.41206 |
| YML090W           | 14.97028 | 9.888404 | 21.73725 | 8.95431  | 19.58848 | 27.39617 | 0.263649 | 3.372832 | 11.41401 |
| YGL168W           | 58.72956 | 53.39738 | 57.3073  | 42.98069 | 47.2428  | 50.87861 | -0.26399 | 52.84104 | 17.56002 |
| YHR110W           | 1940.378 | 1501.06  | 1834.822 | 1697.737 | 1728.395 | 1520.488 | -0.09307 | 1427.832 | 1434.654 |
| YJR098C           | 245.2823 | 282.8084 | 311.2379 | 277.5836 | 267.3251 | 299.401  | 0.008537 | 191.1272 | 218.6223 |
| YDR068W           | 970.765  | 863.2577 | 787.4813 | 981.3924 | 888.3951 | 776.8772 | 0.013781 | 1183.864 | 1034.285 |
| YER068C- <i>f</i> | 0        | 0        | 0        | 0        | 0        | 0        | #DIV/0!  | 4.49711  | 0.878001 |
| YNL265C           | 251.0401 | 244.2436 | 325.0707 | 253.407  | 285.7613 | 244.6087 | -0.0658  | 355.2717 | 289.7404 |
| YOR381W- <i>f</i> | 2.30312  | 4.944202 | 0        | 6.268017 | 11.52263 | 5.870608 | 1.707007 | 22.48555 | 14.92602 |
| YDL245C           | 8.06092  | 9.888404 | 9.880568 | 10.74517 | 9.218108 | 17.61182 | 0.433142 | 20.23699 | 19.31602 |
| YLL014W           | 947.7338 | 974.0078 | 815.1469 | 924.9802 | 941.3993 | 765.1359 | -0.05664 | 788.1185 | 646.2088 |
| YJL205C           | 178.4918 | 193.8127 | 199.5875 | 181.7725 | 203.9506 | 130.1318 | -0.14878 | 173.1387 | 172.0882 |
| YKL125W           | 1297.808 | 1589.067 | 1560.142 | 1600.135 | 1593.58  | 1565.496 | 0.097885 | 1289.546 | 1360.902 |
| YHR045W           | 923.5511 | 963.1306 | 1008.806 | 1086.158 | 1028.971 | 1186.841 | 0.189521 | 1213.095 | 1151.059 |
| YBR050C           | 128.9747 | 99.87288 | 63.23564 | 44.77155 | 50.69959 | 47.9433  | -1.02619 | 48.34393 | 40.38805 |
| YPR070W           | 829.1232 | 780.1951 | 807.2424 | 733.358  | 857.284  | 899.1815 | 0.043088 | 888.1792 | 949.9972 |
| YDR543C           | 2.30312  | 1.977681 | 0        | 0        | 4.609054 | 1.956869 | 0.617117 | 0        | 0        |
| YPR178W           | 307.4665 | 298.6298 | 286.5365 | 313.4009 | 269.6297 | 306.2501 | -0.00543 | 386.7515 | 347.6884 |
| YNL270C           | 47.21396 | 50.43086 | 41.49839 | 31.34009 | 9.218108 | 19.56869 | -1.21049 | 49.46821 | 67.60608 |
| YMR296C           | 4803.157 | 4944.202 | 4774.291 | 5716.432 | 5542.387 | 4955.772 | 0.159087 | 5593.28  | 5821.147 |
| YIL122W           | 369.6507 | 412.3465 | 386.3302 | 400.2577 | 304.1976 | 312.1207 | -0.20073 | 394.6214 | 445.1465 |
| YDL149W           | 240.676  | 205.6788 | 277.644  | 197.8903 | 171.6873 | 213.2988 | -0.3128  | 259.7081 | 329.2504 |
| YMR299C           | 485.9583 | 453.8778 | 448.5778 | 511.2911 | 456.2963 | 456.929  | 0.037035 | 359.7688 | 365.2484 |
| YLR192C           | 6484.434 | 6455.15  | 6173.379 | 6518.738 | 6423.869 | 5804.075 | -0.02792 | 5814.763 | 5480.483 |
| YGL194C- <i>f</i> | 128.9747 | 140.4153 | 100.7818 | 147.7461 | 132.5103 | 153.6143 | 0.22907  | 128.1676 | 129.9442 |
| YHL037C           | 0        | 0.98884  | 0        | 0        | 3.45679  | 1.956869 | 2.452795 | 3.372832 | 6.146008 |
| YDL244W           | 20.72808 | 27.68753 | 3.952227 | 16.11776 | 13.82716 | 9.784347 | -0.39848 | 49.46821 | 35.12004 |
| YBL108W           | 3.45468  | 11.86609 | 3.952227 | 3.581724 | 5.761317 | 2.935304 | -0.65046 | 2.248555 | 0        |
| YNL206C           | 1266.716 | 1181.664 | 1190.608 | 1281.362 | 1122.305 | 1188.798 | -0.01856 | 1427.832 | 1358.268 |
| YGR054W           | 4620.058 | 5278.43  | 4807.885 | 5312.592 | 5358.025 | 5478.256 | 0.134992 | 4298.113 | 4643.748 |
| YNL019C           | 92.1248  | 95.91752 | 143.2682 | 107.4517 | 72.5926  | 45.98643 | -0.55167 | 48.34393 | 48.29006 |
| YEL076C- <i>f</i> | 0        | 0        | 0        | 0        | 1.152263 | 0.978435 | #DIV/0!  | 5.621387 | 1.756002 |
| YBR013C           | 44.91084 | 61.30811 | 63.23564 | 56.41215 | 48.39507 | 65.55513 | 0.007708 | 73.07804 | 81.6541  |
| YFR037C           | 1900.074 | 2119.085 | 2536.342 | 2573.469 | 2589.136 | 2834.525 | 0.286776 | 2385.717 | 2955.352 |
| YPL253C           | 405.3491 | 350.0495 | 407.0794 | 372.4993 | 482.7984 | 481.3899 | 0.201459 | 473.3208 | 488.1686 |
| YFR016C           | 1273.625 | 980.9297 | 1303.247 | 1212.414 | 1192.593 | 1534.186 | 0.146914 | 1286.173 | 1550.55  |
| YMR052W           | 88.67012 | 107.7836 | 135.3638 | 96.70655 | 133.6626 | 100.7788 | -0.00291 | 140.5347 | 126.4322 |

|           |          |          |          |          |          |          |          |          |          |
|-----------|----------|----------|----------|----------|----------|----------|----------|----------|----------|
| YOL060C   | 1574.182 | 1749.259 | 1693.529 | 1530.292 | 1474.897 | 1393.291 | -0.18981 | 1070.312 | 1354.756 |
| YOL037C   | 6.90936  | 8.899564 | 6.916398 | 3.581724 | 6.913581 | 5.870608 | -0.47361 | 6.745665 | 10.53601 |
| YDR034W-I | 116.3076 | 88.99564 | 61.25952 | 71.63448 | 63.37449 | 91.97286 | -0.2319  | 41.59827 | 67.60608 |
| YCL001W-I | 2.30312  | 13.84377 | 14.82085 | 2.686293 | 10.37037 | 11.74122 | -0.32055 | 17.98844 | 14.04802 |
| YBL082C   | 622.9939 | 820.7376 | 710.4129 | 792.4565 | 744.3622 | 717.1926 | 0.06538  | 896.0492 | 873.6111 |
| YBR199W   | 2861.626 | 2746.999 | 2959.23  | 2861.798 | 2906.008 | 3183.827 | 0.063217 | 3445.91  | 3180.12  |
| YPL228W   | 852.1544 | 673.4003 | 876.4064 | 677.8413 | 788.1482 | 992.1328 | 0.033344 | 939.896  | 1021.993 |
| YLR330W   | 3348.736 | 3118.803 | 3530.327 | 3313.99  | 3438.354 | 3860.903 | 0.086174 | 3947.338 | 3892.179 |
| YOL100W   | 272.9197 | 287.7526 | 388.3063 | 302.6557 | 339.9177 | 475.5193 | 0.236592 | 321.5434 | 610.2107 |
| YPL019C   | 2046.322 | 1891.652 | 2163.844 | 1592.076 | 1569.383 | 1860.983 | -0.28085 | 1613.338 | 1678.738 |
| YFR021W   | 602.2658 | 700.099  | 596.7863 | 635.756  | 676.3787 | 585.104  | -0.00145 | 791.4913 | 674.3048 |
| YPR180W   | 674.8141 | 696.1437 | 738.0784 | 624.1154 | 677.5309 | 669.2493 | -0.09773 | 761.1359 | 823.565  |
| YKR084C   | 1341.567 | 1371.522 | 1350.674 | 1440.749 | 1442.634 | 1592.892 | 0.139482 | 1567.243 | 1487.334 |
| YKR081C   | 3864.635 | 4115.554 | 3540.208 | 4608.783 | 4368.231 | 3713.16  | 0.139521 | 3943.965 | 3645.46  |
| YOR357C   | 785.3639 | 769.3179 | 766.7321 | 719.0311 | 845.7614 | 681.969  | -0.04716 | 648.7081 | 588.2607 |
| YER101C   | 219.9479 | 288.7414 | 259.8589 | 258.7796 | 304.1976 | 274.9402 | 0.124672 | 191.1272 | 215.1103 |
| YKL180W   | 35060.39 | 31313.61 | 33673.96 | 34663.03 | 34411.2  | 32081.9  | 0.015892 | 36012.86 | 30718.62 |
| YJL127C-I | 1151.56  | 1016.528 | 1019.675 | 1011.837 | 1110.782 | 932.4483 | -0.06134 | 1036.584 | 834.979  |
| YDR233C   | 15561.03 | 15241.99 | 14599.53 | 17021.25 | 17085.76 | 15530.69 | 0.128663 | 15757.87 | 14186.74 |
| YOR295W   | 669.0563 | 636.8132 | 552.3238 | 656.3509 | 601.4815 | 571.4059 | -0.02266 | 535.1561 | 451.2926 |
| YLR365W   | 14.97028 | 10.87724 | 16.79697 | 7.163448 | 4.609054 | 13.69809 | -0.74353 | 1.124277 | 10.53601 |
| YFR032C-I | 7558.839 | 6023.027 | 6154.606 | 6558.137 | 6760.33  | 6669.989 | 0.018303 | 8239.83  | 6232.052 |
| YNL309W   | 550.4457 | 462.7773 | 569.1207 | 507.7094 | 511.605  | 545.9666 | -0.01564 | 535.1561 | 616.3568 |
| YNL043C   | 41.45616 | 31.64289 | 25.68948 | 40.2944  | 46.09054 | 19.56869 | 0.101018 | 26.98266 | 18.43802 |
| YDR139C   | 1365.75  | 1116.401 | 1208.393 | 1240.172 | 1323.951 | 1252.396 | 0.048424 | 1318.777 | 1048.333 |
| YLR412W   | 1074.405 | 903.8002 | 938.654  | 891.8493 | 989.7943 | 979.4131 | -0.02787 | 864.5694 | 852.539  |
| YPL043W   | 2893.87  | 3042.662 | 3046.179 | 3665.895 | 3625.021 | 3739.577 | 0.296274 | 3225.552 | 3055.444 |
| YFL037W   | 7490.897 | 7160.194 | 7435.128 | 7302.24  | 7418.272 | 7286.403 | -0.00519 | 8382.613 | 8166.288 |
| YOR126C   | 564.2644 | 446.9559 | 458.4584 | 462.9378 | 526.5844 | 515.6351 | 0.034414 | 627.3468 | 590.8947 |
| YDR208W   | 1328.9   | 1155.954 | 1330.913 | 1264.349 | 1381.564 | 1769.988 | 0.210735 | 1513.277 | 1681.372 |
| YDL022W   | 16710.29 | 16404.86 | 15957.12 | 11207.21 | 10648.07 | 10024.06 | -0.62229 | 15313.78 | 14425.56 |
| YLR318W   | 216.4933 | 255.1208 | 209.468  | 265.943  | 221.2346 | 212.3203 | 0.038491 | 147.2803 | 172.0882 |
| YDL004W   | 3311.886 | 2920.046 | 2963.182 | 2780.313 | 2782.716 | 2762.121 | -0.14339 | 3099.633 | 2829.797 |
| YNL187W   | 393.8335 | 356.9714 | 360.6407 | 321.4597 | 341.07   | 332.6678 | -0.15938 | 215.8613 | 268.6683 |
| YLR297W   | 409.9553 | 390.592  | 288.5126 | 403.8394 | 440.1646 | 366.913  | 0.153017 | 312.5491 | 235.3043 |
| YEL013W   | 1016.827 | 1125.3   | 1073.03  | 1113.916 | 1086.584 | 1039.098 | 0.010926 | 827.4682 | 977.2152 |
| YJL069C   | 2569.13  | 2695.579 | 2599.578 | 3026.557 | 3283.951 | 3290.476 | 0.287866 | 2583.59  | 2658.587 |
| YDR328C   | 1848.254 | 1729.482 | 1937.579 | 1816.83  | 1847.078 | 1766.075 | -0.0225  | 2138.376 | 2079.985 |
| YFL017W-I | 367.3476 | 376.7482 | 337.9154 | 357.277  | 386.0083 | 306.2501 | -0.04396 | 356.396  | 235.3043 |
| YDR456W   | 1000.706 | 1006.64  | 923.8331 | 851.5549 | 940.247  | 850.2598 | -0.14982 | 776.8757 | 810.395  |
| YJR074W   | 1171.136 | 1019.494 | 1086.863 | 1182.864 | 1068.148 | 864.9363 | -0.07292 | 870.1908 | 725.2289 |
| YDR138W   | 576.9315 | 557.706  | 616.5475 | 581.1347 | 627.9836 | 786.6615 | 0.188621 | 573.3815 | 788.445  |
| YKR008W   | 876.3371 | 885.0122 | 1051.292 | 931.2483 | 1024.362 | 1162.38  | 0.148691 | 1070.312 | 1191.447 |
| YBR248C   | 1766.493 | 2098.319 | 1895.093 | 1829.366 | 1878.189 | 1780.751 | -0.06968 | 1913.52  | 2094.911 |
| YGL143C   | 490.5645 | 606.1592 | 550.3477 | 530.9906 | 536.9548 | 492.1527 | -0.07827 | 484.5636 | 479.3886 |
| YOL093W   | 1541.939 | 1801.667 | 1647.091 | 1881.301 | 1871.276 | 1745.528 | 0.139693 | 1504.283 | 1355.634 |
| YLR267W   | 199.2199 | 200.7346 | 193.6591 | 132.5238 | 173.9918 | 133.0671 | -0.43339 | 128.1676 | 131.7002 |
| YBL111C   | 1.15156  | 0        | 0        | 0        | 1.152263 | 0        | 0.000881 | 7.869942 | 0        |
| YER120W   | 8394.872 | 6982.202 | 6890.708 | 7526.993 | 7240.824 | 6553.556 | -0.06266 | 7123.422 | 5975.675 |
| YLR440C   | 947.7338 | 849.4139 | 868.5019 | 949.1569 | 956.3787 | 968.6504 | 0.108666 | 798.237  | 664.6468 |
| YDR109C   | 508.9895 | 635.8244 | 537.5029 | 510.3957 | 488.5597 | 549.8803 | -0.11927 | 362.0173 | 434.6105 |
| YDR309C   | 1991.047 | 2140.84  | 2269.567 | 2511.684 | 2499.259 | 2908.886 | 0.30707  | 1754.997 | 1950.04  |
| YOL145C   | 2054.383 | 1728.493 | 1980.066 | 2045.164 | 1933.498 | 2339.437 | 0.132685 | 2183.347 | 2331.971 |
| YPL227C   | 1362.295 | 1479.305 | 1547.297 | 1502.533 | 1580.905 | 1603.654 | 0.094835 | 1424.46  | 1267.834 |

|         |          |          |          |          |          |          |          |          |          |
|---------|----------|----------|----------|----------|----------|----------|----------|----------|----------|
| YBR247C | 3108.06  | 3419.41  | 3166.722 | 3764.392 | 3932.675 | 3837.421 | 0.250761 | 3091.763 | 3360.988 |
| YBR252W | 2017.533 | 1724.538 | 1804.192 | 2012.929 | 2024.527 | 1828.694 | 0.080898 | 1879.792 | 1545.282 |
| YOR060C | 184.2496 | 128.5493 | 145.2444 | 141.4781 | 159.0124 | 184.9242 | 0.083734 | 151.7775 | 251.1083 |
| YHR001W | 1771.099 | 1692.895 | 1703.41  | 1600.135 | 1534.815 | 1521.466 | -0.15022 | 1407.595 | 1485.578 |
| YNL271C | 1199.925 | 1090.691 | 1323.008 | 1171.224 | 1317.037 | 1552.776 | 0.161279 | 1321.026 | 1716.492 |
| YBL106C | 363.8929 | 319.3955 | 346.8079 | 310.7146 | 347.9836 | 330.7109 | -0.05814 | 283.3179 | 234.4263 |
| YLR053C | 88.67012 | 85.04028 | 76.08038 | 69.84362 | 81.81071 | 76.31791 | -0.13186 | 148.4046 | 86.92211 |
| YLR146C | 703.6031 | 834.5813 | 715.3531 | 837.228  | 874.568  | 774.9203 | 0.14205  | 699.3006 | 681.3288 |
| YFR011C | 634.5095 | 606.1592 | 624.4519 | 635.756  | 565.7614 | 524.441  | -0.11187 | 598.1156 | 550.5067 |
| YKL124W | 101.3373 | 188.8685 | 165.0055 | 164.7593 | 122.1399 | 153.6143 | -0.04735 | 185.5058 | 197.5502 |
| YDR021W | 774.9998 | 924.5658 | 819.0991 | 1035.118 | 972.5104 | 1012.68  | 0.262037 | 818.474  | 703.2789 |
| YJL188C | 63.3358  | 34.60942 | 17.78502 | 58.20302 | 61.06996 | 48.92174 | 0.539367 | 43.84682 | 28.97404 |
| YMR044W | 1036.404 | 1082.78  | 1107.612 | 1123.766 | 1201.811 | 1236.741 | 0.142714 | 1308.659 | 1322.27  |
| YBR207W | 1053.677 | 1426.897 | 1169.859 | 1134.511 | 1058.93  | 1010.723 | -0.18812 | 1017.471 | 997.4092 |
| YOR183W | 2.30312  | 0.98884  | 0.988057 | 1.790862 | 4.609054 | 1.956869 | 0.965332 | 10.1185  | 5.268006 |
| YGL076C | 36070.31 | 29193.54 | 35071.08 | 36861.31 | 35492.02 | 35312.69 | 0.101739 | 45516.37 | 40707.64 |
| YFL011W | 0        | 4.944202 | 0        | 1.790862 | 6.913581 | 1.956869 | 1.108575 | 4.49711  | 3.512004 |
| YOR057W | 984.5837 | 872.1573 | 820.0872 | 960.7975 | 882.6338 | 835.5832 | 0.001178 | 1156.882 | 1007.067 |
| YDR182W | 1203.38  | 1095.635 | 1191.597 | 1176.596 | 1374.65  | 1297.404 | 0.140873 | 1322.15  | 1379.34  |
| YDR069C | 369.6507 | 353.016  | 397.1988 | 328.6232 | 333.0041 | 519.5488 | 0.076899 | 550.896  | 498.7046 |
| YHR198C | 658.6923 | 737.675  | 581.9655 | 568.5987 | 592.2634 | 519.5488 | -0.23547 | 550.896  | 598.7967 |
| YPL231W | 29350.96 | 30593.73 | 27553.94 | 31616.77 | 29865.52 | 30636.75 | 0.074239 | 25125.35 | 23951.87 |
| YJL157C | 3202.488 | 3116.825 | 3117.319 | 3632.764 | 3545.515 | 4109.426 | 0.258408 | 2702.763 | 2928.134 |
| YBR289W | 808.3951 | 791.0723 | 935.6898 | 879.3133 | 850.3704 | 1189.777 | 0.203626 | 921.9075 | 1172.131 |
| YPL104W | 893.6105 | 901.8225 | 935.6898 | 744.1032 | 876.8725 | 843.4107 | -0.14827 | 773.5029 | 735.7649 |
| YJL062W | 1624.851 | 1482.272 | 1592.748 | 1442.539 | 1416.132 | 1192.712 | -0.21421 | 1585.231 | 1309.978 |
| YGR026W | 2386.032 | 2215.991 | 2049.23  | 2421.245 | 2476.214 | 2339.437 | 0.121745 | 3001.821 | 2574.299 |
| YKL044W | 92.1248  | 91.96216 | 92.87734 | 99.39284 | 79.50618 | 87.08069 | -0.05838 | 84.32081 | 146.6262 |
| YMR258C | 697.8453 | 800.9608 | 750.9232 | 610.684  | 693.6626 | 734.8045 | -0.14178 | 537.4046 | 587.3827 |
| YML036W | 527.4145 | 544.8511 | 632.3564 | 481.7419 | 500.0823 | 505.8507 | -0.19639 | 459.8295 | 383.6865 |
| YJL041W | 2116.567 | 2019.212 | 2228.068 | 2260.068 | 2325.268 | 2887.361 | 0.23173  | 2378.971 | 2817.505 |
| YDL128W | 1681.278 | 2095.353 | 1757.753 | 1909.954 | 1860.906 | 1743.571 | -0.00521 | 1651.564 | 1610.254 |
| YOL001W | 254.4947 | 250.1766 | 217.3725 | 271.3156 | 290.3704 | 204.4929 | 0.085595 | 366.5145 | 297.6424 |
| YNL082W | 332.8008 | 357.9602 | 348.7841 | 349.2181 | 390.6173 | 517.592  | 0.274523 | 418.2312 | 465.3406 |
| YDL190C | 1233.321 | 1174.742 | 1380.315 | 1188.237 | 1261.728 | 1379.593 | 0.015598 | 1372.743 | 1546.16  |
| YHR103W | 1279.383 | 954.231  | 1378.339 | 1378.068 | 1457.613 | 1756.29  | 0.346335 | 1435.702 | 1703.322 |
| YHR062C | 1505.089 | 1683.995 | 1375.375 | 1844.588 | 1656.955 | 1530.272 | 0.140635 | 1417.714 | 1350.366 |
| YIL131C | 1171.136 | 1075.858 | 1142.194 | 1110.334 | 1184.527 | 1057.688 | -0.01568 | 854.4509 | 976.3372 |
| YDR418W | 5700.222 | 4128.409 | 4752.553 | 5420.939 | 4919.013 | 4626.039 | 0.03758  | 5222.269 | 4277.621 |
| YDL206W | 191.1589 | 203.7011 | 211.4442 | 135.2101 | 126.749  | 169.2692 | -0.49159 | 202.3699 | 214.2323 |
| YHL048W | 96.73103 | 106.7948 | 128.4474 | 115.5106 | 124.4445 | 129.1534 | 0.152978 | 69.7052  | 86.04411 |
| YHR064C | 7915.823 | 8529.738 | 8923.141 | 9374.267 | 9018.766 | 9195.329 | 0.12101  | 9614.821 | 9966.19  |
| YBR083W | 2017.533 | 2195.226 | 2132.227 | 2287.826 | 2434.733 | 2432.389 | 0.173324 | 2193.465 | 2379.383 |
| YOR184W | 4677.636 | 4810.709 | 4690.306 | 4613.261 | 4368.231 | 4352.078 | -0.08866 | 4934.454 | 4879.93  |
| YER128W | 482.5036 | 496.3979 | 440.6733 | 538.154  | 482.7984 | 446.1662 | 0.047527 | 337.2832 | 369.6385 |
| YOL119C | 564.2644 | 689.2218 | 572.0849 | 649.1875 | 581.8931 | 512.6998 | -0.06613 | 389      | 434.6105 |
| YHR166C | 398.4397 | 378.7259 | 331.9871 | 397.5714 | 334.1564 | 266.1342 | -0.15255 | 517.1676 | 414.4165 |
| YKL003C | 1064.041 | 909.7332 | 1011.77  | 892.7447 | 977.1194 | 874.7206 | -0.12141 | 936.5231 | 786.689  |
| YNL097C | 56.42644 | 103.8282 | 95.84151 | 82.37965 | 82.96297 | 62.61982 | -0.16789 | 49.46821 | 66.72808 |
| YBR250W | 26.48588 | 28.67637 | 31.61782 | 27.75836 | 20.74074 | 21.52556 | -0.3095  | 13.49133 | 19.31602 |
| YBL088C | 665.6016 | 639.7798 | 697.5681 | 641.1286 | 682.14   | 833.6264 | 0.10683  | 512.6705 | 567.1887 |
| YHL006C | 305.1634 | 238.3105 | 271.7156 | 226.544  | 253.498  | 217.2125 | -0.22545 | 203.4942 | 173.8442 |
| YDR079W | 624.1455 | 684.2776 | 565.1685 | 549.7946 | 621.07   | 510.7429 | -0.15597 | 584.6243 | 554.8967 |
| YDL020C | 1031.798 | 1007.628 | 954.4629 | 883.7904 | 890.6997 | 760.2438 | -0.24019 | 957.8844 | 1079.941 |

|                   |          |          |          |          |          |          |          |          |          |
|-------------------|----------|----------|----------|----------|----------|----------|----------|----------|----------|
| YLL031C           | 1121.619 | 935.4431 | 1175.788 | 1070.936 | 1128.066 | 1459.825 | 0.178574 | 1270.434 | 1313.49  |
| YLR363W- <i>f</i> | 930.4604 | 1021.472 | 985.0927 | 1116.602 | 1227.161 | 909.9443 | 0.147729 | 964.6301 | 912.2431 |
| YGL205W           | 48.36552 | 31.64289 | 22.72531 | 44.77155 | 51.85186 | 28.37461 | 0.282995 | 47.21965 | 54.43607 |
| YJR136C           | 400.7429 | 373.7817 | 391.2705 | 430.7023 | 358.3539 | 346.3659 | -0.03809 | 294.5607 | 318.7144 |
| YGL081W           | 101.3373 | 103.8282 | 65.21175 | 101.1837 | 77.20165 | 66.53356 | -0.14267 | 41.59827 | 64.09408 |
| YGL137W           | 3841.604 | 3902.953 | 3991.75  | 4204.049 | 3975.309 | 4226.838 | 0.080082 | 4372.315 | 4808.812 |
| YML102W           | 644.8736 | 943.3538 | 696.5801 | 889.163  | 757.0371 | 668.2709 | 0.01861  | 536.2804 | 529.4346 |
| YLR357W           | 532.0207 | 543.8622 | 646.1892 | 651.8738 | 662.5515 | 897.2246 | 0.360977 | 572.2572 | 958.7772 |
| YHR192W           | 849.8512 | 825.6818 | 901.1078 | 907.0716 | 925.2676 | 855.1519 | 0.060769 | 1041.081 | 998.2872 |
| YNL276C           | 0        | 4.944202 | 0.988057 | 0        | 0        | 3.913739 | -0.60003 | 0        | 0        |
| YPR100W           | 64.48736 | 57.35275 | 50.3909  | 61.78474 | 54.15638 | 56.74921 | 0.003843 | 52.84104 | 38.63205 |
| YDL209C           | 438.7443 | 605.1703 | 491.0642 | 412.7937 | 477.0371 | 394.3092 | -0.25742 | 368.763  | 390.7105 |
| YML009C           | 1032.949 | 898.856  | 879.3706 | 882.895  | 962.14   | 864.9363 | -0.0529  | 1503.159 | 1346.854 |
| YOR352W           | 376.5601 | 367.8486 | 354.7124 | 302.6557 | 320.3292 | 317.9913 | -0.22412 | 439.5925 | 431.0985 |
| YPL261C           | 13.81872 | 11.86609 | 3.952227 | 3.581724 | 12.6749  | 1.956869 | -0.70239 | 0        | 3.512004 |
| YLR093C           | 1501.634 | 1498.093 | 1471.217 | 1463.134 | 1389.63  | 1295.448 | -0.10809 | 1677.422 | 1605.864 |
| YNL288W           | 1361.144 | 1581.156 | 1401.065 | 1631.475 | 1568.231 | 1515.595 | 0.118537 | 1938.254 | 1587.426 |
| YDL112W           | 1601.82  | 1570.279 | 1577.927 | 1818.62  | 1996.873 | 2346.286 | 0.375412 | 2108.02  | 2272.267 |
| YDR035W           | 3048.179 | 3117.814 | 3131.152 | 3448.305 | 3293.169 | 3266.994 | 0.106361 | 3481.887 | 3496.2   |
| YLR333C           | 11289.89 | 9875.549 | 9925.031 | 11077.38 | 11251.85 | 10236.38 | 0.066877 | 11555.32 | 9722.984 |
| YMR162C           | 912.0355 | 818.7599 | 881.3467 | 768.2798 | 796.2141 | 1091.933 | 0.024254 | 577.8786 | 705.9129 |
| YIL041W           | 6540.86  | 5977.54  | 5811.75  | 6340.547 | 6297.12  | 5339.318 | -0.02807 | 5818.136 | 4732.426 |
| YGL080W           | 1210.289 | 1180.675 | 1281.51  | 1199.878 | 1083.128 | 937.3405 | -0.18954 | 1527.893 | 1372.316 |
| YDR270W           | 442.199  | 514.197  | 512.8015 | 448.6109 | 417.1194 | 472.584  | -0.13461 | 514.9191 | 648.8428 |
| YBR044C           | 730.089  | 783.1616 | 842.8125 | 741.4169 | 782.3869 | 647.7238 | -0.11767 | 644.211  | 654.9888 |
| YHR026W           | 5479.122 | 5164.714 | 5116.158 | 5242.749 | 5216.297 | 4845.209 | -0.04233 | 5397.656 | 4318.887 |
| YBR215W           | 776.1514 | 643.7351 | 841.8244 | 733.358  | 838.8478 | 969.6288 | 0.168456 | 794.8642 | 1038.675 |
| YNL197C           | 976.5228 | 953.2422 | 1250.88  | 974.229  | 1206.42  | 1491.135 | 0.207162 | 1117.532 | 1548.794 |
| YOL047C           | 9.21248  | 5.933043 | 11.85668 | 10.74517 | 6.913581 | 5.870608 | -0.19862 | 15.73988 | 25.46203 |
| YDR119W           | 2033.655 | 2386.072 | 2211.271 | 2340.657 | 2500.412 | 2568.391 | 0.160142 | 2023.699 | 2005.354 |
| YBR159W           | 3304.977 | 3085.182 | 2911.803 | 3156.394 | 3203.292 | 3100.66  | 0.024358 | 2947.856 | 2824.529 |
| YER117W           | 26809.47 | 21166.13 | 24435.63 | 25129.38 | 25512.27 | 24598.83 | 0.055295 | 26839.88 | 22480.34 |
| YDR142C           | 322.4368 | 359.9379 | 323.0946 | 263.2567 | 307.6543 | 282.7676 | -0.2361  | 223.7312 | 270.4243 |
| YLR116W           | 765.7874 | 912.6997 | 723.2576 | 772.757  | 678.6832 | 835.5832 | -0.07061 | 884.8064 | 932.4371 |
| YER076W- <i>f</i> | 10.36404 | 5.933043 | 4.940284 | 3.581724 | 11.52263 | 0.978435 | -0.40109 | 21.36127 | 13.17002 |
| YIL056W           | 1500.483 | 1544.569 | 1437.623 | 1344.042 | 1177.613 | 1141.833 | -0.29114 | 1364.873 | 1597.084 |
| YGR207C           | 1715.824 | 1682.018 | 1482.085 | 1499.847 | 1457.613 | 1323.822 | -0.18882 | 1381.737 | 1236.226 |
| YPR104C           | 946.5823 | 932.4765 | 1020.663 | 970.6472 | 1111.934 | 1385.464 | 0.258208 | 810.6041 | 893.8051 |
| YLL003W           | 709.3609 | 639.7798 | 861.5856 | 736.0443 | 723.6215 | 741.6535 | -0.00615 | 573.3815 | 565.4327 |
| YER095W           | 1440.601 | 1874.841 | 1362.53  | 1231.218 | 1303.21  | 1124.221 | -0.35457 | 1669.552 | 1516.308 |
| YDR386W           | 391.5304 | 393.5585 | 525.6462 | 470.9967 | 417.1194 | 576.298  | 0.159947 | 344.0289 | 343.2984 |
| YOL051W           | 1503.937 | 1419.975 | 1944.496 | 1780.117 | 2109.794 | 2973.463 | 0.495468 | 1748.251 | 2806.969 |
| YMR151W           | 6.90936  | 15.82145 | 12.84474 | 9.849741 | 5.761317 | 15.65496 | -0.18629 | 4.49711  | 2.634003 |
| YER115C           | 723.1796 | 667.4673 | 532.5626 | 522.9317 | 497.7778 | 509.7645 | -0.32954 | 494.6821 | 421.4405 |
| YDR066C           | 285.5869 | 266.9869 | 262.8231 | 298.1785 | 280      | 247.544  | 0.018155 | 230.4769 | 182.6242 |
| YCR009C           | 3139.152 | 2750.954 | 3255.647 | 3040.884 | 3120.329 | 3068.371 | 0.013164 | 3619.049 | 3639.314 |
| YDL197C           | 608.0236 | 540.8957 | 641.2489 | 642.9195 | 599.177  | 599.7805 | 0.041082 | 447.4624 | 496.9486 |
| YML058W- <i>f</i> | 367.3476 | 304.5629 | 300.3693 | 284.7471 | 292.6749 | 224.0615 | -0.2787  | 254.0867 | 165.9422 |
| YMR013W- <i>f</i> | 6.90936  | 6.921883 | 4.940284 | 8.95431  | 9.218108 | 0.978435 | 0.028863 | 1.124277 | 0.878001 |
| YDR370C           | 829.1232 | 712.954  | 633.3444 | 649.1875 | 702.8807 | 722.0848 | -0.06877 | 622.8497 | 546.1167 |
| YDR503C           | 665.6016 | 669.445  | 625.44   | 635.756  | 619.9177 | 548.9019 | -0.11955 | 541.9017 | 395.1005 |
| YBR190W           | 3.45468  | 7.910723 | 5.928341 | 0.895431 | 8.065844 | 9.784347 | 0.116303 | 1.124277 | 1.756002 |
| YJL199C           | 291.3447 | 337.1946 | 268.7515 | 285.6425 | 250.0412 | 165.3555 | -0.35608 | 173.1387 | 215.1103 |
| YPR014C           | 46.0624  | 22.74333 | 41.49839 | 27.75836 | 47.2428  | 41.09426 | 0.073824 | 75.32659 | 47.41206 |



|           |          |          |          |          |          |          |          |          |          |
|-----------|----------|----------|----------|----------|----------|----------|----------|----------|----------|
| YIL065C   | 1166.53  | 860.2912 | 995.9613 | 954.5295 | 829.6297 | 796.4459 | -0.22817 | 1262.564 | 1096.623 |
| YER075C   | 681.7235 | 765.3625 | 871.4661 | 762.0118 | 844.6091 | 1124.221 | 0.236122 | 844.3324 | 1072.917 |
| YOR180C   | 169.2793 | 147.3372 | 96.82957 | 130.7329 | 192.428  | 126.2181 | 0.120233 | 107.9306 | 115.8961 |
| YOL007C   | 1411.812 | 1489.194 | 1739.968 | 1623.416 | 1676.543 | 1993.072 | 0.189666 | 1788.725 | 1807.804 |
| YML015C   | 1305.869 | 1194.519 | 1273.605 | 1349.415 | 1226.008 | 1315.016 | 0.043841 | 919.659  | 1144.035 |
| YJR129C   | 742.7562 | 684.2776 | 724.2457 | 877.5224 | 737.4486 | 727.9554 | 0.123117 | 541.9017 | 658.5008 |
| YBR164C   | 1651.337 | 1541.602 | 1666.852 | 1679.829 | 1698.436 | 1449.062 | -0.00967 | 2101.275 | 1811.316 |
| YGR158C   | 1583.395 | 1584.122 | 1529.512 | 1785.489 | 1735.309 | 1613.439 | 0.128401 | 1897.78  | 1766.538 |
| YOR210W   | 2399.851 | 2089.42  | 2017.612 | 2487.507 | 2534.98  | 2352.157 | 0.180607 | 2363.231 | 1930.724 |
| YPL175W   | 538.9301 | 600.2261 | 516.7537 | 700.2271 | 622.2223 | 589.9961 | 0.207794 | 498.0549 | 454.8046 |
| YLR312W-1 | 1346.174 | 1459.528 | 1320.044 | 1294.793 | 1230.617 | 1050.839 | -0.20621 | 1308.659 | 1242.372 |
| YKL133C   | 105.9435 | 150.3037 | 134.3757 | 127.1512 | 99.09466 | 107.6278 | -0.22647 | 116.9249 | 93.06811 |
| YBR287W   | 1164.227 | 1441.729 | 1205.429 | 1089.74  | 981.7285 | 862.9794 | -0.37723 | 1545.882 | 1439.044 |
| YBR037C   | 1336.961 | 1405.142 | 1232.107 | 1154.211 | 985.1853 | 827.7558 | -0.42159 | 1043.33  | 931.5591 |
| YNL009W   | 146.2481 | 173.0471 | 118.5668 | 92.2294  | 81.81071 | 81.21008 | -0.77856 | 137.1619 | 174.7222 |
| YBR049C   | 1646.731 | 1523.803 | 1847.666 | 1688.783 | 1855.144 | 2409.885 | 0.246644 | 1876.419 | 2236.269 |
| YCR043C   | 1011.07  | 908.7444 | 1043.388 | 1078.994 | 1079.671 | 955.9307 | 0.071888 | 1072.561 | 871.8551 |
| YNL002C   | 3803.602 | 4193.672 | 4049.057 | 4574.757 | 4614.815 | 3984.186 | 0.129073 | 3928.226 | 3840.377 |
| YKR060W   | 1150.408 | 1089.702 | 1134.289 | 1284.048 | 1379.259 | 1222.065 | 0.203422 | 994.9856 | 1067.649 |
| YCR022C   | 10.36404 | 9.888404 | 1.976114 | 15.22233 | 19.58848 | 2.935304 | 0.763914 | 15.73988 | 20.19402 |
| YNL152W   | 529.7176 | 507.2751 | 583.9416 | 551.5855 | 503.5391 | 581.1902 | 0.013625 | 619.4769 | 633.0388 |
| YGR102C   | 849.8512 | 782.1728 | 788.4693 | 834.5417 | 813.498  | 711.322  | -0.0369  | 765.633  | 743.6669 |
| YOL137W   | 483.6552 | 608.1369 | 530.5865 | 671.5733 | 549.6297 | 637.9394 | 0.196527 | 498.0549 | 436.3665 |
| YPL124W   | 294.7993 | 277.8642 | 277.644  | 224.7532 | 263.8683 | 285.7029 | -0.13505 | 310.3006 | 325.7384 |
| YDR141C   | 747.3624 | 749.541  | 854.6692 | 697.5408 | 724.7737 | 875.6991 | -0.03324 | 835.3382 | 890.2931 |
| YGL260W   | 8.06092  | 1.977681 | 6.916398 | 0.895431 | 8.065844 | 3.913739 | -0.39714 | 10.1185  | 9.658012 |
| YPR172W   | 1039.859 | 1004.662 | 1094.767 | 1021.687 | 986.3375 | 784.7046 | -0.16876 | 948.8902 | 773.5189 |
| YNL025C   | 168.1278 | 195.7904 | 210.4561 | 175.5045 | 140.5761 | 195.6869 | -0.1665  | 196.7486 | 281.8383 |
| YKR025W   | 1789.524 | 1847.154 | 1841.738 | 1832.947 | 1805.597 | 1818.91  | -0.00553 | 1681.919 | 1695.42  |
| YER066C-1 | 10.36404 | 7.910723 | 4.940284 | 8.058879 | 8.065844 | 5.870608 | -0.07786 | 11.24277 | 14.92602 |
| YPL025C   | 26.48588 | 31.64289 | 19.76114 | 14.3269  | 50.69959 | 14.67652 | 0.033198 | 20.23699 | 12.29202 |
| YEL005C   | 271.7681 | 260.065  | 251.9545 | 237.2892 | 328.3951 | 226.0184 | 0.014496 | 382.2543 | 316.0804 |
| YDR498C   | 1303.566 | 1307.247 | 1227.167 | 1325.238 | 1187.984 | 1191.733 | -0.05089 | 1009.601 | 1011.457 |
| YMR061W   | 1498.179 | 1451.618 | 1604.604 | 1595.658 | 1580.905 | 1904.034 | 0.157737 | 1296.292 | 1360.902 |
| YMR243C   | 6854.085 | 7096.908 | 7251.349 | 8008.735 | 8000.165 | 7670.928 | 0.159435 | 7042.474 | 6668.418 |
| YKL097C   | 2.30312  | 16.81029 | 7.904455 | 17.01319 | 12.6749  | 5.870608 | 0.396289 | 4.49711  | 5.268006 |
| YGL221C   | 2464.338 | 2154.683 | 2426.668 | 2529.593 | 2384.033 | 2436.302 | 0.060989 | 3115.373 | 2579.567 |
| YML088W   | 810.6982 | 986.8628 | 995.9613 | 1007.36  | 920.6585 | 1052.796 | 0.093621 | 963.5058 | 1006.189 |
| YGR192C   | 458323.2 | 384483.9 | 424012.7 | 430373.7 | 409114.6 | 406248.1 | -0.02421 | 436610.9 | 365004.4 |
| YEL072W   | 178.4918 | 278.853  | 177.8502 | 162.073  | 215.4733 | 145.7868 | -0.27947 | 248.4653 | 235.3043 |
| YBR163W   | 522.8082 | 396.525  | 522.6821 | 505.0231 | 513.9095 | 495.088  | 0.070298 | 364.2659 | 413.5385 |
| YLR006C   | 796.8795 | 707.0209 | 734.1262 | 590.089  | 610.6996 | 610.5433 | -0.30518 | 676.815  | 780.543  |
| YKL072W   | 488.2614 | 432.1233 | 410.0436 | 399.3622 | 417.1194 | 511.7214 | -0.00242 | 562.1387 | 496.9486 |
| YGR271C-1 | 1011.07  | 906.7667 | 978.1763 | 1277.78  | 1356.214 | 1102.696 | 0.367693 | 1041.081 | 1002.677 |
| YKL092C   | 405.3491 | 345.1053 | 425.8525 | 470.9967 | 460.9054 | 542.0528 | 0.325428 | 505.9249 | 503.0946 |
| YIL092W   | 396.1366 | 473.6546 | 398.1869 | 531.886  | 486.2552 | 457.9074 | 0.21921  | 344.0289 | 333.6404 |
| YNL209W   | 37972.69 | 36548.53 | 38208.16 | 40826.28 | 39757.7  | 42435.69 | 0.126026 | 47381.55 | 43342.52 |
| YKL001C   | 1290.899 | 1424.919 | 1434.659 | 1327.029 | 1413.827 | 1123.243 | -0.10314 | 1158.006 | 1144.913 |
| YGR001C   | 1690.49  | 1608.843 | 1602.628 | 1819.516 | 1629.301 | 1663.339 | 0.060573 | 1504.283 | 1527.722 |
| YKL070W   | 260.2525 | 329.2839 | 328.0349 | 246.2435 | 328.3951 | 227.9753 | -0.19311 | 233.8497 | 221.2563 |
| YHR208W   | 3346.433 | 3274.051 | 3315.919 | 3372.193 | 3427.984 | 3478.335 | 0.048836 | 3407.685 | 3559.416 |
| YOR219C   | 537.7785 | 449.9224 | 591.846  | 565.9124 | 566.9136 | 626.1982 | 0.155265 | 602.6127 | 676.0608 |
| YBR275C   | 815.3044 | 699.1102 | 721.2815 | 780.8159 | 846.9136 | 1090.955 | 0.282184 | 857.8237 | 1019.359 |
| YBR143C   | 7305.496 | 7507.277 | 7328.417 | 7851.139 | 7579.589 | 7931.192 | 0.077426 | 7471.948 | 6996.791 |

|                   |          |          |          |          |          |          |          |          |          |
|-------------------|----------|----------|----------|----------|----------|----------|----------|----------|----------|
| YJR142W           | 675.9657 | 558.6948 | 607.6549 | 527.4089 | 521.9754 | 560.6431 | -0.19443 | 671.1937 | 697.1329 |
| YPL097W           | 510.1411 | 635.8244 | 544.4193 | 457.5653 | 474.7325 | 434.425  | -0.30663 | 431.7226 | 494.3146 |
| YLR222C- <i>f</i> | 29.94056 | 12.85493 | 15.80891 | 15.22233 | 16.13169 | 19.56869 | -0.2027  | 10.1185  | 10.53601 |
| YPL012W           | 3528.38  | 3636.955 | 3980.881 | 4504.913 | 4695.474 | 5541.854 | 0.403402 | 3440.289 | 4223.185 |
| YJR110W           | 430.6834 | 439.0452 | 420.9122 | 336.6821 | 297.284  | 465.7349 | -0.23098 | 492.4335 | 480.2666 |
| YGR190C           | 50.66864 | 55.37506 | 47.42673 | 51.03957 | 39.17696 | 58.70608 | -0.0434  | 47.21965 | 80.7761  |
| YNL095C           | 444.5021 | 521.1189 | 434.745  | 438.7612 | 428.642  | 418.7701 | -0.12272 | 538.5289 | 543.4827 |
| YMR092C           | 2280.089 | 2038     | 2332.802 | 2209.924 | 2129.383 | 2249.421 | -0.01355 | 1880.916 | 1808.682 |
| YER088C           | 2215.601 | 2194.237 | 2389.121 | 2336.18  | 2377.12  | 2319.869 | 0.048861 | 2445.304 | 2764.825 |
| YDR340W           | 14.97028 | 7.910723 | 6.916398 | 7.163448 | 8.065844 | 6.849043 | -0.43256 | 0        | 7.024009 |
| YOL013W- <i>f</i> | 29.94056 | 18.78797 | 19.76114 | 21.49034 | 32.26338 | 13.69809 | -0.02203 | 2.248555 | 7.024009 |
| YBR018C           | 11.5156  | 9.888404 | 3.952227 | 1.790862 | 4.609054 | 3.913739 | -1.29778 | 17.98844 | 7.024009 |
| YBR141C           | 540.0816 | 620.9918 | 526.6343 | 545.3175 | 548.4774 | 459.8643 | -0.11939 | 520.5405 | 431.0985 |
| YNL327W           | 2891.567 | 3027.829 | 3158.818 | 3177.885 | 3542.058 | 3999.841 | 0.239795 | 3253.659 | 3703.409 |
| YPL060W           | 255.6463 | 217.5449 | 253.9306 | 256.0933 | 266.1729 | 243.6302 | 0.074952 | 201.2457 | 193.1602 |
| YGL013C           | 760.0296 | 813.8157 | 920.869  | 786.1884 | 797.3663 | 1108.567 | 0.109869 | 798.237  | 1106.281 |
| YNL263C           | 2185.661 | 2209.07  | 2341.695 | 2303.049 | 2484.28  | 2307.149 | 0.074713 | 2033.818 | 1907.896 |
| YMR173W- <i>f</i> | 32.24368 | 13.84377 | 19.76114 | 21.49034 | 19.58848 | 13.69809 | -0.26558 | 17.98844 | 7.024009 |
| YDR029W           | 39.15304 | 27.68753 | 38.53422 | 26.86293 | 34.5679  | 57.72765 | 0.177352 | 22.48555 | 69.36208 |
| YDR481C           | 1711.218 | 2012.29  | 1797.275 | 1698.633 | 1680     | 1564.517 | -0.15944 | 1897.78  | 1807.804 |
| YJR125C           | 1963.41  | 1947.027 | 2094.68  | 1873.242 | 1925.432 | 1838.479 | -0.09123 | 2399.208 | 2117.739 |
| YHR063W- <i>f</i> | 11.5156  | 3.955362 | 3.952227 | 15.22233 | 6.913581 | 8.805912 | 0.671778 | 8.99422  | 1.756002 |
| YKR064W           | 480.2005 | 513.2082 | 598.7624 | 592.7753 | 601.4815 | 744.5888 | 0.284203 | 592.4942 | 755.0809 |
| YGR146C- <i>f</i> | 6.90936  | 11.86609 | 9.880568 | 17.90862 | 14.97943 | 5.870608 | 0.435681 | 4.49711  | 6.146008 |
| YMR135W- <i>f</i> | 0        | 1.977681 | 1.976114 | 3.581724 | 0        | 0        | -0.14258 | 1.124277 | 5.268006 |
| YGR063C           | 47.21396 | 51.4197  | 36.5581  | 48.35328 | 59.9177  | 39.13739 | 0.124811 | 8.99422  | 37.75405 |
| YBR046C           | 656.3892 | 795.0277 | 743.0187 | 547.1084 | 562.3046 | 569.449  | -0.38637 | 609.3584 | 544.3607 |
| YAR018C           | 748.514  | 952.2533 | 804.2783 | 799.6199 | 815.8025 | 806.2302 | -0.04884 | 667.8208 | 698.0109 |
| YLR429W           | 5339.783 | 5094.506 | 5335.507 | 5120.97  | 5294.651 | 5081.011 | -0.02521 | 4174.442 | 4570.874 |
| YGL204C           | 94.42792 | 100.8617 | 90.90123 | 74.32078 | 123.2922 | 96.86504 | 0.041182 | 60.71098 | 71.11809 |
| YJL127W- <i>f</i> | 27.63744 | 35.59826 | 51.37895 | 16.11776 | 21.89301 | 32.28835 | -0.70521 | 26.98266 | 64.97208 |
| YOL085W- <i>f</i> | 21.87964 | 18.78797 | 6.916398 | 16.11776 | 16.13169 | 12.71965 | -0.08154 | 14.61561 | 5.268006 |
| YDL071C           | 31.09212 | 42.52014 | 46.43867 | 25.07207 | 33.41564 | 26.41774 | -0.49972 | 15.73988 | 25.46203 |
| YDR433W           | 168.1278 | 108.7724 | 126.4713 | 143.269  | 129.0535 | 85.12382 | -0.17438 | 214.737  | 193.1602 |
| YJR037W           | 0        | 0        | 0        | 0        | 0        | 2.935304 | #DIV/0!  | 0        | 4.390005 |
| YNR026C           | 1004.16  | 966.0971 | 1132.313 | 1117.498 | 1073.91  | 1261.202 | 0.154223 | 1285.049 | 1197.593 |
| YGL044C           | 793.4248 | 710.9763 | 692.6278 | 734.2534 | 634.8972 | 697.624  | -0.08817 | 861.1965 | 755.9589 |
| YIL102C           | 8.06092  | 12.85493 | 18.77308 | 0        | 0        | 0.978435 | -5.34212 | 0        | 3.512004 |
| YDR175C           | 1128.529 | 1297.359 | 1246.928 | 1104.066 | 1061.235 | 1059.645 | -0.18761 | 1141.142 | 976.3372 |
| YAL034W- <i>f</i> | 259.101  | 250.1766 | 213.4203 | 215.7989 | 253.498  | 226.9969 | -0.0537  | 182.133  | 198.4282 |
| YDR074W           | 5719.798 | 5006.499 | 5839.416 | 3229.82  | 3159.506 | 4204.334 | -0.645   | 5106.468 | 5621.841 |
| YBR209W           | 46.0624  | 56.3639  | 50.3909  | 39.39897 | 39.17696 | 32.28835 | -0.46301 | 33.72832 | 30.73004 |
| YLL021W           | 2116.567 | 1656.308 | 2335.766 | 2146.348 | 2394.403 | 3150.56  | 0.332378 | 2331.751 | 2883.356 |
| YDL024C           | 87.51856 | 76.14071 | 76.08038 | 51.03957 | 64.52675 | 34.24522 | -0.67832 | 35.97688 | 71.11809 |
| YHR050W           | 1552.303 | 1669.163 | 1595.712 | 1517.756 | 1526.749 | 1485.264 | -0.08875 | 1328.896 | 1353     |
| YGR220C           | 808.3951 | 847.4363 | 865.5378 | 801.4108 | 712.0988 | 765.1359 | -0.14603 | 789.2428 | 718.2049 |
| YFR036W           | 521.6567 | 458.822  | 455.4942 | 479.951  | 542.7161 | 387.4601 | -0.0262  | 737.526  | 533.8247 |
| YDR359C           | 772.6967 | 704.0544 | 644.2131 | 755.7438 | 804.2799 | 834.6048 | 0.175082 | 556.5174 | 684.8408 |
| YBR140C           | 1410.661 | 1212.318 | 1384.268 | 1170.328 | 1327.408 | 1547.884 | 0.013749 | 1109.662 | 1169.497 |
| YJL131C           | 560.8097 | 471.6769 | 529.5985 | 472.7876 | 460.9054 | 415.8348 | -0.21102 | 453.0838 | 417.0505 |
| YMR077C           | 401.8944 | 384.6589 | 338.9035 | 364.4404 | 298.4362 | 313.0991 | -0.20559 | 455.3324 | 448.6585 |
| YNR029C           | 954.6432 | 996.7512 | 1070.066 | 1241.067 | 1346.996 | 1242.612 | 0.342353 | 1032.087 | 1006.189 |
| YLR398C           | 1102.043 | 1164.854 | 1182.704 | 1093.321 | 1201.811 | 1431.45  | 0.111424 | 1225.462 | 1417.972 |
| YGR254W           | 37618.01 | 34497.68 | 36623.31 | 37033.24 | 33536.63 | 32580.9  | -0.07611 | 52384.58 | 46500.69 |

|           |          |          |          |          |          |          |          |          |          |
|-----------|----------|----------|----------|----------|----------|----------|----------|----------|----------|
| YNL154C   | 3004.42  | 2767.764 | 3017.526 | 2849.262 | 2760.823 | 2856.051 | -0.05411 | 3280.642 | 3339.916 |
| YEL049W   | 41.45616 | 62.29695 | 54.34313 | 63.5756  | 40.32922 | 65.55513 | 0.100141 | 13.49133 | 46.53406 |
| YMR247C   | 1077.86  | 993.7846 | 1133.301 | 1026.164 | 1054.321 | 1325.779 | 0.08789  | 1199.604 | 1381.096 |
| YIL061C   | 658.6923 | 708.0098 | 634.3325 | 714.554  | 607.2428 | 648.7022 | -0.02219 | 521.6648 | 539.0927 |
| YJL083W   | 282.1322 | 266.9869 | 280.6081 | 251.6161 | 230.4527 | 305.2716 | -0.07565 | 287.815  | 331.0064 |
| YOL054W   | 525.1113 | 548.8064 | 524.6582 | 547.1084 | 566.9136 | 578.2549 | 0.082178 | 631.8439 | 661.1348 |
| YDR486C   | 1752.674 | 1512.926 | 1553.225 | 1523.128 | 1547.49  | 1343.391 | -0.12659 | 1358.127 | 1338.952 |
| YHR217C   | 0        | 0        | 0        | 0        | 0        | 0        | #DIV/0!  | 0        | 0        |
| YKL165C-1 | 26.48588 | 30.65405 | 31.61782 | 32.23552 | 26.50206 | 20.54713 | -0.16283 | 5.621387 | 19.31602 |
| YNL104C   | 2945.69  | 3331.403 | 2771.499 | 2766.882 | 2778.107 | 2593.83  | -0.15287 | 3008.567 | 3049.298 |
| YER044C-1 | 21.87964 | 36.5871  | 59.28341 | 24.17664 | 29.95885 | 59.68452 | -0.04897 | 22.48555 | 29.85204 |
| YER150W   | 5686.403 | 6194.096 | 5389.85  | 5107.539 | 4491.523 | 3836.443 | -0.36225 | 5914.824 | 4965.096 |
| YLR199C   | 868.2762 | 947.3091 | 790.4455 | 833.6463 | 827.3252 | 749.481  | -0.11255 | 1106.289 | 842.003  |
| YLR388W   | 7011.848 | 5635.402 | 5760.371 | 6088.931 | 6486.091 | 5987.042 | 0.012054 | 7002     | 5786.027 |
| YBR109C   | 5474.516 | 4486.369 | 5156.669 | 5114.702 | 4940.906 | 4643.651 | -0.04048 | 6724.304 | 5861.535 |
| YBR115C   | 1843.647 | 1968.781 | 2044.29  | 1984.275 | 2017.613 | 2275.839 | 0.10015  | 1983.225 | 2239.781 |
| YLR082C   | 259.101  | 330.2727 | 311.2379 | 217.5897 | 241.9753 | 268.0911 | -0.30765 | 375.5087 | 336.2744 |
| YML127W   | 1117.013 | 1199.463 | 1304.235 | 1178.387 | 1228.313 | 1286.642 | 0.028653 | 1385.11  | 1340.708 |
| YOL114C   | 16.12184 | 16.81029 | 16.79697 | 24.17664 | 18.43622 | 16.63339 | 0.252634 | 14.61561 | 47.41206 |
| YDR389W   | 991.4931 | 874.1349 | 1057.221 | 1005.569 | 1079.671 | 1121.286 | 0.133636 | 1070.312 | 1248.518 |
| YNL063W   | 374.257  | 383.6701 | 330.011  | 371.6039 | 327.2428 | 328.7541 | -0.08232 | 336.159  | 318.7144 |
| YPL116W   | 992.6447 | 1041.249 | 1012.758 | 891.8493 | 1061.235 | 1104.653 | 0.00524  | 770.1301 | 798.103  |
| YDR378C   | 1479.755 | 1247.917 | 1250.88  | 1348.519 | 1385.021 | 1410.903 | 0.058935 | 1317.653 | 1147.547 |
| YDL214C   | 152.0059 | 132.5046 | 163.0294 | 143.269  | 155.5556 | 134.0456 | -0.04808 | 198.9971 | 230.0363 |
| YJL095W   | 765.7874 | 685.2664 | 824.0394 | 783.5021 | 754.7326 | 994.0897 | 0.154537 | 969.1272 | 956.1432 |
| YGL094C   | 742.7562 | 662.5231 | 821.0752 | 733.358  | 723.6215 | 994.0897 | 0.138728 | 890.4278 | 893.8051 |
| YGL182C   | 0        | 8.899564 | 3.952227 | 9.849741 | 2.304527 | 0.978435 | 0.031194 | 0        | 0.878001 |
| YDL092W   | 2351.485 | 2004.38  | 2055.158 | 2260.068 | 2416.296 | 1982.309 | 0.05468  | 2258.673 | 1956.186 |
| YOL030W   | 6176.968 | 6565.9   | 6622.945 | 7254.782 | 7478.19  | 6804.035 | 0.153306 | 6026.127 | 5368.977 |
| YPL182C   | 4.60624  | 6.921883 | 3.952227 | 7.163448 | 8.065844 | 11.74122 | 0.800945 | 2.248555 | 0.878001 |
| YHR201C   | 1968.016 | 2002.402 | 1703.41  | 1846.379 | 1962.305 | 1792.492 | -0.01859 | 2497.02  | 1992.184 |
| YDR390C   | 1026.04  | 941.3761 | 1115.516 | 992.1376 | 1093.498 | 1194.669 | 0.089527 | 1205.225 | 1118.573 |
| YOR168W   | 2354.94  | 2620.427 | 2889.078 | 3044.465 | 3224.033 | 4172.046 | 0.40878  | 3335.731 | 3699.897 |
| YGR082W   | 4035.066 | 3721.995 | 3665.691 | 4013.322 | 3850.865 | 3364.837 | -0.02468 | 3975.445 | 3548.002 |
| YPL169C   | 2427.488 | 2615.483 | 2571.912 | 2598.541 | 2604.115 | 2688.739 | 0.051458 | 2717.379 | 2765.703 |
| YPL067C   | 268.3135 | 336.2057 | 252.9425 | 285.6425 | 285.7613 | 236.7812 | -0.08539 | 364.2659 | 356.4684 |
| YGR116W   | 2341.121 | 1919.339 | 2688.503 | 2371.997 | 2833.416 | 3925.48  | 0.393958 | 2915.252 | 3351.33  |
| YDL157C   | 1260.958 | 980.9297 | 1114.528 | 1104.962 | 1039.342 | 928.5345 | -0.12735 | 1576.237 | 1259.054 |
| YHR183W   | 16117.23 | 15418    | 14904.84 | 17083.03 | 15820.58 | 14304.72 | 0.023671 | 13534.05 | 12604.58 |
| YLR148W   | 453.7146 | 404.4357 | 513.7895 | 449.5064 | 554.2387 | 657.5081 | 0.276055 | 516.0434 | 687.4748 |
| YER132C   | 708.2094 | 724.82   | 846.7647 | 880.2087 | 835.391  | 1004.852 | 0.254943 | 643.0867 | 723.4729 |
| YGR053C   | 70.24516 | 61.30811 | 54.34313 | 48.35328 | 34.5679  | 41.09426 | -0.58398 | 77.57515 | 86.04411 |
| YCR028C-1 | 3110.363 | 2669.869 | 2956.266 | 3002.38  | 3023.539 | 2717.113 | 0.001079 | 2793.83  | 2591.859 |
| YIL143C   | 950.0369 | 1156.943 | 1083.898 | 1086.158 | 1037.037 | 1168.251 | 0.044768 | 1149.012 | 1283.638 |
| YLR043C   | 7679.753 | 6566.889 | 7123.89  | 7115.99  | 7783.54  | 7028.097 | 0.037127 | 7685.561 | 6087.181 |
| YPL203W   | 1515.453 | 1478.316 | 1516.667 | 1158.688 | 1223.704 | 1420.687 | -0.2461  | 1450.318 | 1626.058 |
| YER016W   | 1234.472 | 1268.682 | 1187.644 | 1187.342 | 1239.835 | 1052.796 | -0.08486 | 1434.578 | 1293.296 |
| YOL108C   | 536.6269 | 534.9627 | 548.3715 | 484.4282 | 462.0577 | 357.1287 | -0.31344 | 672.3179 | 586.5047 |
| YLR112W   | 190.0074 | 196.7792 | 203.5397 | 178.1908 | 154.4033 | 143.8299 | -0.30927 | 147.2803 | 100.0921 |
| YJL216C   | 109.3982 | 98.88404 | 130.4235 | 111.9289 | 130.2058 | 168.2908 | 0.277088 | 91.06648 | 81.6541  |
| YIL024C   | 150.8544 | 158.2145 | 133.3877 | 134.3147 | 156.7078 | 128.1749 | -0.07791 | 187.7543 | 231.7923 |
| YNL289W   | 1278.232 | 1355.7   | 1267.677 | 1411.199 | 1329.712 | 1276.857 | 0.042325 | 1162.503 | 979.8492 |
| YLR109W   | 38123.54 | 30335.65 | 33023.82 | 34225.16 | 33697.95 | 31040.84 | -0.03626 | 52122.63 | 44473.39 |
| YDR388W   | 5165.898 | 5017.376 | 4909.654 | 5056.499 | 5129.877 | 4681.81  | -0.02164 | 5665.234 | 5222.35  |

|         |          |          |          |          |          |          |          |          |          |
|---------|----------|----------|----------|----------|----------|----------|----------|----------|----------|
| YLL060C | 254.4947 | 300.6075 | 256.8948 | 269.5247 | 212.0165 | 250.4793 | -0.14959 | 196.7486 | 168.5762 |
| YPL022W | 741.6046 | 700.099  | 721.2815 | 620.5337 | 644.1153 | 904.0737 | 0.003822 | 737.526  | 1025.505 |
| YJR052W | 629.9033 | 590.3377 | 581.9655 | 551.5855 | 632.5926 | 648.7022 | 0.024348 | 706.0463 | 652.3548 |
| YHR036W | 523.9598 | 730.7531 | 736.1023 | 746.7895 | 660.247  | 730.8907 | 0.102853 | 494.6821 | 565.4327 |
| YOR265W | 1060.587 | 834.5813 | 911.9765 | 852.4503 | 947.1606 | 894.2893 | -0.05941 | 801.6098 | 765.6169 |
| YPL121C | 13.81872 | 6.921883 | 15.80891 | 5.372586 | 16.13169 | 1.956869 | -0.63958 | 2.248555 | 0.878001 |
| YNL136W | 966.1588 | 851.3916 | 862.5736 | 842.6006 | 803.1276 | 796.4459 | -0.13413 | 928.6532 | 1082.575 |
| YLR084C | 1144.651 | 1255.827 | 1304.235 | 1312.702 | 1304.362 | 1681.929 | 0.214637 | 1245.699 | 1748.1   |
| YFL034W | 702.4516 | 691.1995 | 656.0697 | 644.7103 | 668.3128 | 677.0768 | -0.04259 | 476.6937 | 484.6566 |
| YGL159W | 490.5645 | 501.3421 | 545.4074 | 504.1277 | 571.5227 | 470.6271 | 0.008387 | 499.1792 | 410.9045 |
| YOR034C | 732.3921 | 635.8244 | 620.4997 | 648.2921 | 700.5762 | 702.5161 | 0.04476  | 575.6301 | 547.8727 |
| YHL026C | 692.0875 | 1004.662 | 764.756  | 1068.249 | 896.461  | 795.4674 | 0.16522  | 709.4191 | 706.7909 |
| YKL002W | 2044.019 | 1802.656 | 1806.168 | 1918.909 | 1879.342 | 1768.032 | -0.02226 | 2262.046 | 2049.255 |
| Q0255   | 0        | 0        | 0        | 0        | 0        | 0        | #DIV/0!  | 2.248555 | 1.756002 |
| YMR234W | 665.6016 | 695.1548 | 776.6127 | 770.0707 | 672.9219 | 718.1711 | 0.015972 | 552.0202 | 624.2588 |
| YFR039C | 815.3044 | 841.5032 | 761.7918 | 827.3783 | 790.4527 | 848.3029 | 0.028079 | 659.9509 | 658.5008 |
| YHR014W | 25.33432 | 60.31927 | 27.66559 | 59.09845 | 36.87243 | 25.4393  | 0.099497 | 4.49711  | 23.70603 |
| YNL092W | 157.7637 | 130.5269 | 113.6265 | 106.5563 | 127.9012 | 107.6278 | -0.23254 | 183.2572 | 168.5762 |
| YPL188W | 854.4575 | 1052.126 | 931.7376 | 1078.994 | 1071.605 | 942.2326 | 0.123891 | 795.9885 | 796.347  |
| YEL009C | 19232.2  | 16990.26 | 16544.02 | 18187.99 | 17130.7  | 15002.34 | -0.06846 | 17935.6  | 15195.56 |
| YDR411C | 1095.134 | 1455.573 | 1323.008 | 1179.283 | 1140.741 | 1003.874 | -0.22084 | 985.9913 | 920.1451 |
| YOR143C | 851.0028 | 908.7444 | 779.5768 | 825.5874 | 890.6997 | 858.0872 | 0.019777 | 793.7399 | 741.9109 |
| YJL099W | 431.835  | 386.6366 | 383.366  | 326.8323 | 380.2469 | 358.1071 | -0.17414 | 404.7399 | 479.3886 |
| YMR226C | 5412.332 | 5040.12  | 5279.188 | 5418.253 | 5169.054 | 4867.713 | -0.02559 | 5266.116 | 4175.773 |
| YML047C | 0        | 1.977681 | 0        | 1.790862 | 0        | 1.956869 | 0.922208 | 2.248555 | 2.634003 |
| YER125W | 2086.627 | 2287.188 | 2331.814 | 2117.694 | 2180.082 | 2599.701 | 0.040696 | 2591.46  | 2768.337 |
| YOR166C | 596.508  | 624.9472 | 715.3531 | 615.1611 | 671.7696 | 825.7989 | 0.125427 | 516.0434 | 534.7027 |
| YHR148W | 1115.862 | 1527.758 | 1358.578 | 1567.004 | 1595.885 | 1411.881 | 0.192907 | 1216.468 | 1204.617 |
| YDL093W | 608.0236 | 733.7196 | 632.3564 | 652.7692 | 625.6791 | 568.4706 | -0.09607 | 582.3757 | 551.3847 |
| YGR208W | 2047.474 | 2111.174 | 1894.105 | 2097.995 | 2016.461 | 2107.548 | 0.039788 | 2373.35  | 2117.739 |
| YNR002C | 209.5839 | 241.2771 | 216.3844 | 159.3867 | 91.02881 | 97.84347 | -0.93806 | 237.2225 | 243.2063 |
| YNL086W | 204.9777 | 208.6453 | 175.8741 | 140.5827 | 132.5103 | 152.6358 | -0.46955 | 254.0867 | 221.2563 |
| YIR039C | 71.39672 | 82.07376 | 57.3073  | 84.17052 | 66.83128 | 70.4473  | 0.071252 | 40.47399 | 33.36404 |
| YDR205W | 619.5392 | 787.117  | 664.9622 | 667.0961 | 645.2675 | 630.112  | -0.09286 | 537.4046 | 552.2627 |
| YNL330C | 1737.704 | 1634.553 | 1751.825 | 1645.802 | 1553.251 | 1612.46  | -0.0908  | 1444.697 | 1421.484 |
| YBR122C | 1859.769 | 1728.493 | 1824.941 | 1789.071 | 1680     | 1523.423 | -0.11672 | 1756.121 | 1555.818 |
| YJL020C | 1313.93  | 1124.312 | 1411.933 | 1209.727 | 1236.379 | 1712.261 | 0.111093 | 1288.422 | 1701.566 |
| YEL027W | 9618.98  | 10305.69 | 9667.148 | 10824.87 | 10341.56 | 8238.42  | -0.00914 | 9608.075 | 8138.192 |
| YLR013W | 3.45468  | 7.910723 | 3.952227 | 0        | 2.304527 | 7.827478 | -0.59627 | 0        | 1.756002 |
| YGR065C | 764.6358 | 1053.115 | 869.49   | 939.3071 | 889.5474 | 832.6479 | -0.01388 | 780.2486 | 640.0628 |
| YML118W | 195.7652 | 193.8127 | 218.3606 | 185.3542 | 117.5309 | 141.873  | -0.4509  | 139.4104 | 145.7482 |
| YLR373C | 593.0534 | 603.1927 | 701.5203 | 651.8738 | 746.6667 | 900.1599 | 0.276516 | 695.9278 | 935.0711 |
| YAL042W | 4153.677 | 4240.148 | 3942.347 | 4178.081 | 4000.659 | 3468.551 | -0.0829  | 5041.26  | 4270.597 |
| YPL027W | 9.21248  | 22.74333 | 26.67753 | 17.90862 | 17.28395 | 17.61182 | -0.15106 | 15.73988 | 5.268006 |
| YLR014C | 419.1678 | 482.5541 | 421.9003 | 482.6373 | 570.3704 | 599.7805 | 0.32041  | 362.0173 | 392.4665 |
| YLR386W | 647.1767 | 605.1703 | 727.2098 | 635.756  | 676.3787 | 818.9499 | 0.10641  | 795.9885 | 856.929  |
| YOR223W | 295.9509 | 358.9491 | 325.0707 | 272.211  | 259.2593 | 260.2636 | -0.30772 | 372.1358 | 322.2264 |
| YER088C | 126.6716 | 157.2256 | 128.4474 | 168.341  | 114.0741 | 112.52   | -0.06223 | 124.7948 | 123.7982 |
| YEL033W | 497.4739 | 418.2795 | 312.226  | 380.5582 | 459.7531 | 282.7676 | -0.12883 | 399.1185 | 274.8143 |
| YER174C | 941.976  | 875.1238 | 886.287  | 900.8036 | 739.7531 | 733.826  | -0.18722 | 708.2948 | 662.0128 |
| YHR143W | 388.0757 | 447.9447 | 291.4768 | 279.3745 | 303.0453 | 318.9697 | -0.3229  | 242.8439 | 251.1083 |
| YGL156W | 684.0266 | 580.4493 | 632.3564 | 511.2911 | 531.1935 | 494.1095 | -0.30386 | 717.289  | 697.1329 |
| YAR030C | 27.63744 | 20.76565 | 16.79697 | 26.86293 | 31.11111 | 29.35304 | 0.421556 | 21.36127 | 17.56002 |
| YGL056C | 2600.222 | 3097.048 | 3043.215 | 2842.994 | 2738.93  | 2894.21  | -0.04431 | 2909.63  | 3109.002 |

|           |          |          |          |          |          |          |          |          |          |
|-----------|----------|----------|----------|----------|----------|----------|----------|----------|----------|
| YDL139C   | 377.7117 | 285.7749 | 270.7276 | 257.8841 | 285.7613 | 246.5655 | -0.24152 | 359.7688 | 410.9045 |
| YGL153W   | 165.8246 | 228.4221 | 219.3486 | 191.6222 | 193.5803 | 185.9026 | -0.10353 | 277.6965 | 243.2063 |
| YLL046C   | 1.15156  | 1.977681 | 2.96417  | 8.058879 | 2.304527 | 5.870608 | 1.413698 | 0        | 0        |
| YGR228W   | 4.60624  | 0.98884  | 0        | 0.895431 | 3.45679  | 2.935304 | 0.38127  | 0        | 0.878001 |
| YJL012C   | 3830.088 | 3993.927 | 3898.872 | 3353.389 | 3242.469 | 3917.653 | -0.15708 | 3236.795 | 3202.948 |
| YBR059C   | 1843.647 | 1550.502 | 1955.364 | 1516.86  | 1478.354 | 1834.565 | -0.14745 | 1873.046 | 2008.866 |
| YDR018C   | 52.97176 | 72.18535 | 69.16398 | 63.5756  | 70.28807 | 39.13739 | -0.16766 | 113.552  | 88.67811 |
| YLR404W   | 498.6255 | 341.1499 | 404.1152 | 354.5907 | 286.9136 | 351.2581 | -0.32534 | 276.5723 | 223.8903 |
| YMR099C   | 3120.727 | 2685.691 | 2971.087 | 2989.844 | 2965.926 | 2825.719 | 0.000655 | 2838.801 | 2535.667 |
| YOL115W   | 832.5778 | 867.2131 | 1032.519 | 933.9346 | 988.6421 | 1079.213 | 0.135702 | 1099.543 | 1076.429 |
| YML078W   | 4464.598 | 3734.85  | 3883.063 | 3908.556 | 3710.288 | 3419.629 | -0.13038 | 4172.194 | 3615.608 |
| YGR144W   | 33.39524 | 21.75449 | 25.68948 | 34.02638 | 27.65432 | 25.4393  | 0.107949 | 68.58093 | 45.65606 |
| YDR067C   | 444.5021 | 543.8622 | 458.4584 | 450.4018 | 503.5391 | 424.6407 | -0.0697  | 589.1214 | 596.1627 |
| YCR082W   | 1848.254 | 1376.466 | 1605.592 | 1419.258 | 1586.667 | 1455.911 | -0.11448 | 1928.136 | 1801.658 |
| YGR138C   | 1149.257 | 1644.442 | 1275.581 | 1552.677 | 1470.288 | 1202.496 | 0.054336 | 1533.514 | 1719.126 |
| YIL140W   | 1263.261 | 1188.586 | 1427.742 | 1315.388 | 1410.37  | 1728.894 | 0.199409 | 1351.382 | 1513.674 |
| YNR045W   | 279.8291 | 322.362  | 332.9752 | 199.6811 | 251.1934 | 246.5655 | -0.42315 | 314.7977 | 375.7845 |
| YLL035W   | 566.5675 | 702.0767 | 696.5801 | 662.619  | 679.8354 | 688.818  | 0.04769  | 608.2341 | 533.8247 |
| YGL059W   | 173.8856 | 196.7792 | 214.4083 | 127.1512 | 138.2716 | 162.4202 | -0.45154 | 192.2514 | 177.3562 |
| YOR246C   | 2528.826 | 2728.211 | 2501.76  | 2712.261 | 2619.095 | 2300.3   | -0.02384 | 2186.72  | 2160.761 |
| YLL041C   | 1728.491 | 1732.448 | 1799.251 | 1531.187 | 1463.375 | 1539.078 | -0.21445 | 1450.318 | 1490.846 |
| YKR065C   | 2103.9   | 1818.478 | 1930.663 | 2024.57  | 1896.626 | 1502.876 | -0.10981 | 1842.691 | 1777.952 |
| YLR203C   | 2369.91  | 2486.934 | 2358.492 | 2356.774 | 2205.432 | 2250.4   | -0.08286 | 2045.061 | 2361.823 |
| YIR036C   | 973.0681 | 806.8938 | 834.908  | 843.496  | 760.4939 | 604.6727 | -0.24357 | 862.3208 | 635.6728 |
| YDL189W   | 1581.092 | 1527.758 | 1532.476 | 1661.025 | 1637.366 | 1705.412 | 0.108488 | 1225.462 | 1475.92  |
| YER188C-1 | 0        | 1.977681 | 0        | 2.686293 | 2.304527 | 0        | 1.335467 | 0        | 0        |
| YLR022C   | 1501.634 | 1472.383 | 1551.249 | 1596.554 | 1544.033 | 1490.156 | 0.033241 | 1500.91  | 1267.834 |
| YBL078C   | 261.4041 | 223.4779 | 274.6798 | 133.4192 | 177.4486 | 182.9673 | -0.62114 | 250.7139 | 315.2024 |
| YPL110C   | 262.5557 | 270.9423 | 340.8796 | 214.9034 | 252.3457 | 340.4953 | -0.11436 | 277.6965 | 325.7384 |
| YHR017W   | 424.9256 | 430.1456 | 453.5181 | 474.5784 | 500.0823 | 380.6111 | 0.05057  | 580.1272 | 542.6047 |
| YOR030W   | 480.2005 | 516.1747 | 463.3987 | 472.7876 | 498.9301 | 688.818  | 0.185904 | 563.263  | 616.3568 |
| YJL090C   | 462.9271 | 456.8443 | 376.4497 | 428.016  | 523.1276 | 484.3252 | 0.14721  | 290.0636 | 423.1965 |
| YGL053W   | 4.60624  | 22.74333 | 7.904455 | 14.3269  | 25.3498  | 31.30991 | 1.009759 | 13.49133 | 7.024009 |
| YJR056C   | 496.3223 | 450.9112 | 389.2944 | 470.1013 | 440.1646 | 391.3739 | -0.03816 | 324.9162 | 345.9324 |
| YDL176W   | 594.2049 | 552.7618 | 529.5985 | 445.0292 | 455.1441 | 611.5217 | -0.14934 | 406.9884 | 423.1965 |
| YPL045W   | 722.0281 | 783.1616 | 791.4335 | 779.025  | 858.4363 | 940.2758 | 0.166591 | 849.9538 | 868.3431 |
| YOR074C   | 883.2465 | 704.0544 | 748.9471 | 866.7772 | 705.1852 | 684.9043 | -0.04987 | 632.9682 | 563.6767 |
| YLR024C   | 268.3135 | 230.3998 | 249.9784 | 223.8578 | 202.7984 | 303.3148 | -0.03653 | 259.7081 | 334.5184 |
| YMR086W   | 1880.497 | 1811.556 | 2342.683 | 2179.479 | 2203.128 | 3100.66  | 0.310378 | 1515.526 | 1814.828 |
| YIL133C   | 22078.86 | 19203.28 | 19791.77 | 22255.04 | 21221.24 | 19555.97 | 0.045534 | 22223.59 | 19162.37 |
| YLR098C   | 385.7726 | 342.1388 | 386.3302 | 376.9765 | 358.3539 | 382.568  | 0.004727 | 381.1301 | 391.5885 |
| YOR330C   | 698.9969 | 732.7308 | 820.0872 | 682.3184 | 644.1153 | 763.1791 | -0.10785 | 666.6965 | 843.759  |
| YPL005W   | 170.4309 | 173.0471 | 168.9577 | 152.2233 | 133.6626 | 126.2181 | -0.31436 | 195.6243 | 186.1362 |
| YDR454C   | 6261.031 | 5025.287 | 5625.008 | 6180.265 | 5801.647 | 5825.6   | 0.074496 | 5968.789 | 5155.622 |
| YDR196C   | 1122.771 | 862.2689 | 1115.516 | 1037.805 | 897.6132 | 939.2973 | -0.10911 | 972.5    | 834.101  |
| YCR084C   | 4621.21  | 4608.985 | 5341.435 | 5106.643 | 5466.338 | 6436.144 | 0.223147 | 5260.494 | 6179.372 |
| YIL149C   | 1562.667 | 1210.341 | 1776.526 | 1693.26  | 1986.502 | 2494.03  | 0.440438 | 1654.936 | 2636.637 |
| YFR052C-1 | 33.39524 | 12.85493 | 12.84474 | 11.6406  | 24.19753 | 12.71965 | -0.28333 | 13.49133 | 8.780011 |
| YPR052C   | 1683.581 | 1287.47  | 1310.163 | 1481.938 | 1502.552 | 1027.356 | -0.09375 | 1298.54  | 1064.137 |
| YGL063W   | 216.4933 | 348.0718 | 229.2292 | 300.8648 | 262.7161 | 156.5496 | -0.14051 | 138.2861 | 172.9662 |
| YDL155W   | 1141.196 | 1109.479 | 1144.17  | 1078.994 | 1096.955 | 1143.79  | -0.03228 | 1241.202 | 1196.715 |
| YML074C   | 7984.917 | 7465.745 | 8121.827 | 7754.433 | 7510.453 | 7894.011 | -0.02554 | 8940.255 | 8549.096 |
| YPL242C   | 1122.771 | 1101.568 | 1155.038 | 1230.322 | 1208.724 | 1454.932 | 0.204488 | 1271.558 | 1548.794 |
| YMR325W   | 0        | 0        | 0        | 0        | 0        | 0        | #DIV/0!  | 0        | 0        |

|           |          |          |          |          |          |          |          |          |          |
|-----------|----------|----------|----------|----------|----------|----------|----------|----------|----------|
| YGR110W   | 186.5527 | 212.6007 | 148.2085 | 154.9096 | 149.7943 | 100.7788 | -0.43286 | 119.1734 | 99.21412 |
| YGL009C   | 1252.897 | 1294.392 | 1413.909 | 1317.179 | 1391.934 | 1390.356 | 0.0495   | 1253.569 | 1451.336 |
| YMR306W   | 131.2778 | 183.9243 | 180.8144 | 171.9228 | 154.4033 | 161.4417 | -0.02419 | 224.8555 | 187.8922 |
| YDR467C   | 41.45616 | 22.74333 | 28.65365 | 30.44465 | 17.28395 | 24.46087 | -0.36316 | 19.11272 | 10.53601 |
| YEL020C-I | 0        | 3.955362 | 5.928341 |          | 0        | 6.913581 | 0.978435 | -0.32466 | 1.124277 |
| YPL115C   | 643.722  | 622.9695 | 764.756  | 694.8545 | 755.8848 | 1037.141 | 0.292409 | 794.8642 | 985.1172 |
| YIR002C   | 679.4204 | 662.5231 | 800.326  | 710.9722 | 769.712  | 892.3325 | 0.147582 | 898.2977 | 886.7811 |
| YMR264W   | 2171.842 | 1667.185 | 1996.863 | 2079.191 | 2018.766 | 1719.11  | -0.00466 | 2357.61  | 2189.735 |
| YKR027W   | 426.0772 | 441.0228 | 407.0794 | 370.7084 | 399.8354 | 560.6431 | 0.063145 | 543.026  | 549.6287 |
| YDL195W   | 4174.405 | 3920.752 | 4439.339 | 4127.042 | 4417.778 | 5595.668 | 0.173928 | 4623.029 | 5481.361 |
| YLR227C   | 481.3521 | 566.6056 | 461.4225 | 472.7876 | 388.3128 | 414.8563 | -0.24238 | 417.1069 | 378.4185 |
| YKR047W   | 18.42496 | 31.64289 | 12.84474 | 19.69948 | 17.28395 | 17.61182 | -0.20457 | 25.85838 | 45.65606 |
| YDR350C   | 426.0772 | 448.9336 | 399.175  | 368.9176 | 315.7202 | 453.0153 | -0.16351 | 260.8324 | 349.4444 |
| YKL050C   | 168.1278 | 178.9801 | 163.0294 | 126.2558 | 202.7984 | 215.2556 | 0.093543 | 109.0549 | 111.5061 |
| YKL190W   | 1948.439 | 1668.174 | 1609.545 | 1573.272 | 1765.268 | 1514.617 | -0.10683 | 1667.304 | 1463.628 |
| YKL120W   | 846.3966 | 896.8783 | 745.9829 | 876.627  | 974.8149 | 817.9714 | 0.100807 | 619.4769 | 611.0887 |
| YER119C   | 735.8468 | 726.7977 | 777.6007 | 603.5205 | 610.6996 | 527.3763 | -0.36325 | 568.8844 | 593.5287 |
| YKL126W   | 1882.801 | 1887.696 | 2095.669 | 1842.797 | 2029.136 | 2189.737 | 0.047298 | 2213.702 | 2166.907 |
| YKL093W   | 336.2555 | 426.1902 | 413.9958 | 331.3095 | 296.1317 | 242.6518 | -0.43519 | 277.6965 | 270.4243 |
| YOR304W   | 1013.373 | 911.7109 | 1213.334 | 1053.027 | 1155.72  | 1381.55  | 0.194066 | 1188.361 | 1301.198 |
| YOR189W   | 1075.557 | 867.2131 | 877.3945 | 882.895  | 990.9466 | 820.9067 | -0.06563 | 833.0896 | 772.6409 |
| YLR356W   | 1429.086 | 1474.361 | 1266.689 | 1124.661 | 1199.506 | 988.2191 | -0.33222 | 1063.566 | 934.1931 |
| YGR035W-I | 105.9435 | 129.5381 | 89.91317 | 99.39284 | 85.2675  | 91.97286 | -0.23422 | 87.69364 | 91.31211 |
| YGR071C   | 511.2926 | 464.755  | 592.8341 | 559.6444 | 562.3046 | 828.7342 | 0.314243 | 408.1127 | 491.6806 |
| YPL113C   | 110.5498 | 127.5604 | 116.5907 | 87.75224 | 84.11523 | 104.6925 | -0.35901 | 76.45087 | 50.04606 |
| YDL226C   | 2483.915 | 2653.059 | 2494.843 | 2682.711 | 2514.239 | 2214.198 | -0.04233 | 2156.364 | 2111.593 |
| YNL198C   | 1.15156  | 0        | 1.976114 | 0        | 4.609054 | 0        | 0.559381 | 0        | 0        |
| YPL241C   | 352.3773 | 441.0228 | 371.5094 | 395.7805 | 381.3992 | 364.9561 | -0.02848 | 278.8208 | 316.0804 |
| YNL213C   | 1034.101 | 779.2063 | 968.2957 | 913.3396 | 871.1112 | 796.4459 | -0.10804 | 760.0116 | 849.027  |
| YLR372W   | 5980.051 | 6684.561 | 5815.702 | 6218.768 | 6238.354 | 5158.308 | -0.06915 | 5452.746 | 5390.927 |
| YNL050C   | 1141.196 | 1328.013 | 1176.776 | 1319.865 | 1255.967 | 1166.294 | 0.03755  | 1160.254 | 1092.233 |
| YER124C   | 140.4903 | 183.9243 | 181.8025 | 138.7918 | 159.0124 | 143.8299 | -0.1969  | 118.0491 | 100.9701 |
| YER074W   | 35502.59 | 28264.03 | 31625.72 | 33551.8  | 33446.75 | 31234.57 | 0.042336 | 35112.31 | 30056.61 |
| YDR026C   | 931.612  | 865.2354 | 936.6779 | 966.1701 | 940.247  | 1090.955 | 0.132935 | 991.6127 | 1068.527 |
| YBR139W   | 1133.135 | 1144.088 | 1195.549 | 952.7386 | 1093.498 | 894.2893 | -0.24001 | 1255.818 | 1302.954 |
| YDR494W   | 2269.725 | 1922.306 | 2095.669 | 2111.426 | 2170.864 | 2231.81  | 0.051034 | 2060.801 | 1999.208 |
| YNR003C   | 754.2718 | 781.1839 | 844.7886 | 899.0128 | 894.1565 | 859.0657 | 0.156099 | 914.0376 | 916.6331 |
| YFR028C   | 1737.704 | 1736.404 | 1760.717 | 1890.255 | 1819.424 | 1737.7   | 0.057421 | 1331.145 | 1619.912 |
| YNL162W   | 20685.47 | 15115.41 | 18213.84 | 19970.8  | 19549.3  | 17572.69 | 0.079956 | 20344.93 | 17010.39 |
| YAL051W   | 244.1307 | 352.0272 | 366.5691 | 331.3095 | 419.4239 | 512.6998 | 0.392151 | 402.4913 | 402.1245 |
| YPL133C   | 473.2911 | 471.6769 | 497.9806 | 508.6048 | 460.9054 | 452.0368 | -0.02156 | 335.0347 | 381.0525 |
| YOR329C   | 841.7903 | 733.7196 | 813.1708 | 789.7702 | 743.2099 | 903.0952 | 0.028345 | 774.6272 | 884.1471 |
| YDL129W   | 462.9271 | 542.8734 | 508.8493 | 559.6444 | 563.4568 | 536.1822 | 0.131576 | 492.4335 | 431.9765 |
| YGL151W   | 990.3415 | 756.4629 | 1070.066 | 985.8696 | 1007.078 | 1144.769 | 0.155622 | 1046.702 | 1167.741 |
| YJL043W   | 4.60624  | 15.82145 | 23.71336 | 27.75836 | 18.43622 | 19.56869 | 0.575161 | 37.10116 | 35.12004 |
| YMR280C   | 148.5512 | 95.91752 | 119.5549 | 119.9878 | 79.50618 | 89.03756 | -0.3353  | 141.659  | 135.2122 |
| YCL066W   | 0        | 0        | 0        | 0        | 0        | 0        | #DIV/0!  | 3.372832 | 1.756002 |
| YLR305C   | 1520.059 | 1552.479 | 1567.058 | 1433.585 | 1641.975 | 1902.077 | 0.101462 | 1897.78  | 1776.196 |
| YJR157W   | 2.30312  | 1.977681 | 3.952227 | 0        | 4.609054 | 0        | -0.83695 | 0        | 0        |
| YGR164W   | 3.45468  | 0        | 5.928341 | 6.268017 | 0        | 14.67652 | 1.15845  | 0        | 0        |
| YDL116W   | 827.9716 | 852.3805 | 931.7376 | 999.301  | 935.6379 | 1144.769 | 0.237589 | 1175.994 | 1119.451 |
| YAL024C   | 415.7131 | 385.6478 | 428.8167 | 380.5582 | 449.3828 | 570.4274 | 0.18694  | 401.3671 | 611.9667 |
| YER055C   | 5001.225 | 5000.566 | 4863.216 | 4967.851 | 4773.828 | 4218.032 | -0.09065 | 5773.165 | 5232.886 |
| YMR172W   | 514.7473 | 531.0073 | 552.3238 | 493.3825 | 542.7161 | 654.5728 | 0.081258 | 538.5289 | 608.4547 |

|                       |          |          |          |          |          |          |          |          |          |
|-----------------------|----------|----------|----------|----------|----------|----------|----------|----------|----------|
| YLR263W               | 317.8305 | 260.065  | 330.999  | 302.6557 | 298.4362 | 266.1342 | -0.0677  | 194.5    | 251.1083 |
| YBR026C               | 525.1113 | 513.2082 | 470.315  | 427.1206 | 365.2675 | 327.7756 | -0.42953 | 366.5145 | 367.0044 |
| YER031C               | 3326.857 | 2764.798 | 3011.597 | 2827.771 | 2934.815 | 2655.472 | -0.11289 | 3838.283 | 3188.9   |
| YDR346C               | 3450.074 | 3321.515 | 3519.458 | 3700.816 | 3929.218 | 4170.089 | 0.197412 | 3915.858 | 4321.521 |
| YHL006W- <del>f</del> | 70.24516 | 39.55362 | 48.41478 | 22.38578 | 42.63375 | 41.09426 | -0.57626 | 33.72832 | 34.24204 |
| YNR008W               | 1077.86  | 1290.437 | 1214.322 | 1297.48  | 1279.012 | 1321.865 | 0.121852 | 926.4046 | 1129.987 |
| YDR451C               | 477.8974 | 480.5765 | 471.3031 | 493.3825 | 498.9301 | 550.8587 | 0.110108 | 529.5347 | 512.7526 |
| YNL126W               | 324.7399 | 457.8331 | 536.5149 | 385.0353 | 467.819  | 524.441  | 0.062297 | 314.7977 | 334.5184 |
| YJL060W               | 1581.092 | 1611.81  | 1507.775 | 1381.65  | 1359.671 | 1337.52  | -0.20471 | 1098.419 | 1189.691 |
| YNR015W               | 1630.609 | 1839.243 | 1624.365 | 1577.749 | 1540.576 | 1555.711 | -0.12419 | 1424.46  | 1440.8   |
| YOR233W               | 961.5525 | 977.9632 | 1115.516 | 1036.014 | 972.5104 | 1211.302 | 0.075795 | 860.0723 | 802.493  |
| YGL237C               | 636.8126 | 531.0073 | 589.8699 | 528.3043 | 452.8395 | 453.0153 | -0.29348 | 609.3584 | 640.9408 |
| YDR166C               | 667.9048 | 609.1257 | 754.8754 | 718.1357 | 713.2511 | 952.9954 | 0.230782 | 761.1359 | 892.9271 |
| YHR023W               | 849.8512 | 722.8424 | 902.0959 | 776.3387 | 891.8519 | 1017.572 | 0.118026 | 840.9596 | 1074.673 |
| YDR421W               | 533.1723 | 542.8734 | 580.9774 | 521.1409 | 524.2799 | 632.0688 | 0.01771  | 535.1561 | 452.1706 |
| YLR204W               | 1069.799 | 951.2645 | 926.7973 | 911.5488 | 1000.165 | 912.8796 | -0.06163 | 1349.133 | 1242.372 |
| YDL169C               | 163.5215 | 163.1587 | 150.1846 | 137.8964 | 119.8354 | 109.5847 | -0.37656 | 245.0925 | 181.7462 |
| YPL195W               | 893.6105 | 934.4542 | 895.1795 | 923.1894 | 928.7244 | 1025.4   | 0.079396 | 1057.945 | 1061.503 |
| YCRO44C               | 946.5823 | 862.2689 | 969.2837 | 933.9346 | 875.7202 | 882.5481 | -0.04533 | 1187.237 | 937.7051 |
| YMR084W               | 4.60624  | 11.86609 | 19.76114 | 26.86293 | 6.913581 | 3.913739 | 0.056869 | 28.10694 | 28.97404 |
| YDR084C               | 901.6714 | 890.9452 | 959.4032 | 931.2483 | 933.3334 | 810.1439 | -0.0411  | 935.3989 | 752.4469 |
| YNL266W               | 5.7578   | 0.98884  | 1.976114 | 5.372586 | 3.45679  | 0        | 0.017528 | 0        | 0.878001 |
| YER078W- <del>f</del> | 0        | 0        | 0.988057 | 0        | 2.304527 | 0        | 1.221805 | 5.621387 | 3.512004 |
| YHR143W- <del>f</del> | 2922.659 | 3113.859 | 2811.022 | 3317.572 | 3463.704 | 2878.555 | 0.126722 | 3142.356 | 2774.483 |
| YAL064C- <del>f</del> | 0        | 0.98884  | 2.96417  | 0        | 3.45679  | 0        | -0.19352 | 0        | 0        |
| YPL052W               | 277.5259 | 344.1165 | 322.1065 | 310.7146 | 253.498  | 310.1638 | -0.11015 | 387.8757 | 322.2264 |
| YGL127C               | 696.6938 | 868.2019 | 703.4965 | 758.4301 | 773.1688 | 573.3627 | -0.10788 | 991.6127 | 904.3411 |
| YCRO41W               | 2.30312  | 0        | 4.940284 | 7.163448 | 1.152263 | 0        | 0.199172 | 0        | 0.878001 |
| YDR488C               | 203.8261 | 270.9423 | 223.3008 | 214.008  | 261.5638 | 282.7676 | 0.119474 | 186.6301 | 275.6923 |
| YLL047W               | 2.30312  | 3.955362 | 0.988057 | 0        | 0        | 0        | #NUM!    | 6.745665 | 3.512004 |
| YGL119W               | 849.8512 | 1120.356 | 939.642  | 919.6077 | 857.284  | 922.6639 | -0.10822 | 721.7861 | 805.127  |
| YIL103W               | 1043.313 | 1105.524 | 959.4032 | 1093.321 | 1138.436 | 1234.785 | 0.157399 | 1006.228 | 968.4352 |
| YBR090C               | 0        | 2.966521 | 0.988057 | 0.895431 | 2.304527 | 3.913739 | 0.847076 | 1.124277 | 0        |
| YJR010W               | 1117.013 | 1433.819 | 1326.96  | 1551.782 | 1383.868 | 1431.45  | 0.17144  | 897.1734 | 1128.231 |
| YOR177C               | 59.88112 | 74.16303 | 68.17592 | 59.99388 | 49.54733 | 43.05113 | -0.40624 | 43.84682 | 48.29006 |
| YNL324W               | 0        | 0        | 0        | 0        | 0        | 0        | #DIV/0!  | 0        | 4.390005 |
| YOR245C               | 703.6031 | 655.6012 | 729.1859 | 683.2139 | 615.3087 | 588.0393 | -0.14663 | 605.9856 | 633.0388 |
| YOR033C               | 865.9731 | 737.675  | 831.9438 | 768.2798 | 928.7244 | 845.3676 | 0.061903 | 992.737  | 901.7071 |
| YHR121W               | 1211.441 | 1067.948 | 1170.847 | 1241.963 | 1032.428 | 1214.237 | 0.015965 | 1409.844 | 1311.734 |
| YPR072W               | 2673.922 | 2309.931 | 2826.831 | 2761.509 | 2926.749 | 3473.443 | 0.230167 | 2996.199 | 3105.49  |
| YJR036C               | 117.4591 | 65.26347 | 93.8654  | 55.51672 | 101.3992 | 63.59826 | -0.32687 | 97.81214 | 137.8462 |
| YLR096W               | 1133.135 | 1284.504 | 1263.725 | 1409.408 | 1472.593 | 1867.832 | 0.367637 | 1344.636 | 1763.026 |
| YOL077C               | 4076.522 | 4101.71  | 3741.771 | 4615.052 | 4401.646 | 4180.852 | 0.146885 | 4182.312 | 3920.275 |
| YFR044C               | 6076.782 | 5911.288 | 6073.585 | 6199.964 | 6104.692 | 5513.48  | -0.01958 | 7452.835 | 6479.648 |
| YDR317W               | 135.8841 | 175.0248 | 133.3877 | 154.9096 | 119.8354 | 91.97286 | -0.27685 | 64.08382 | 85.1661  |
| YBR243C               | 876.3371 | 1057.07  | 903.0839 | 866.7772 | 881.4816 | 746.5457 | -0.18518 | 786.9942 | 754.2029 |
| YMR122W- <del>f</del> | 12387.33 | 12194.38 | 11730.21 | 12828.84 | 13361.65 | 11275.48 | 0.045138 | 13883.7  | 13309.62 |
| YGR111W               | 963.8557 | 941.3761 | 1054.257 | 980.497  | 927.5721 | 967.6719 | -0.04141 | 975.8729 | 853.417  |
| YCRO45C               | 234.9182 | 252.1543 | 237.1336 | 214.9034 | 241.9753 | 151.6574 | -0.25106 | 169.7659 | 155.4062 |
| YOR254C               | 3553.714 | 3263.173 | 3802.043 | 3939.897 | 4158.519 | 4639.737 | 0.262518 | 4723.09  | 4293.425 |
| YER110C               | 4842.31  | 4945.191 | 5473.835 | 6034.31  | 6034.404 | 6983.089 | 0.320046 | 6246.486 | 6666.662 |
| YOR089C               | 2709.621 | 2738.099 | 2432.596 | 2649.58  | 2496.955 | 2388.359 | -0.06467 | 2486.902 | 2188.857 |
| YLR118C               | 1126.226 | 989.8293 | 1029.555 | 1020.791 | 1004.774 | 978.4347 | -0.06646 | 1027.59  | 906.0971 |
| YGL248W               | 903.9746 | 990.8181 | 951.4987 | 746.7895 | 902.2223 | 839.497  | -0.1938  | 780.2486 | 790.201  |

|         |          |          |          |          |          |          |          |          |          |
|---------|----------|----------|----------|----------|----------|----------|----------|----------|----------|
| YJR066W | 861.3668 | 891.9341 | 902.0959 | 778.1296 | 829.6297 | 884.505  | -0.09147 | 901.6705 | 1023.749 |
| YGL176C | 541.2332 | 523.0966 | 592.8341 | 574.8667 | 580.7408 | 643.81   | 0.118814 | 417.1069 | 539.0927 |
| YJL219W | 52.97176 | 39.55362 | 49.40284 | 37.6081  | 18.43622 | 21.52556 | -0.87159 | 26.98266 | 28.09603 |
| YJL127C | 255.6463 | 255.1208 | 354.7124 | 295.4922 | 357.2017 | 510.7429 | 0.426821 | 368.763  | 400.3685 |
| YDR102C | 14.97028 | 24.72101 | 13.8328  | 17.90862 | 17.28395 | 20.54713 | 0.058517 | 8.99422  | 7.90201  |
| YPR112C | 3134.546 | 3005.086 | 3139.057 | 3762.601 | 3682.634 | 4803.136 | 0.400597 | 2992.827 | 3202.948 |
| YPR161C | 1194.168 | 1227.151 | 1121.444 | 1103.171 | 1191.44  | 1116.394 | -0.05468 | 1278.303 | 1294.174 |
| YDR320C | 1131.983 | 1008.617 | 1116.504 | 1068.249 | 1116.543 | 1209.345 | 0.059455 | 1235.581 | 1295.052 |
| YDR028C | 2519.613 | 1817.489 | 2246.841 | 2198.283 | 1955.391 | 2792.453 | 0.077257 | 2341.87  | 2791.165 |
| YMR131C | 5536.7   | 5752.085 | 6079.514 | 6882.283 | 7119.836 | 7716.915 | 0.322503 | 5872.101 | 5997.625 |
| YPL160W | 5863.743 | 5533.551 | 5949.09  | 6460.535 | 6660.083 | 8310.824 | 0.305094 | 7100.937 | 7155.709 |
| YDR397C | 3.45468  | 11.86609 | 5.928341 | 6.268017 | 2.304527 | 8.805912 | -0.2901  | 3.372832 | 2.634003 |
| YGL052W | 2.30312  | 1.977681 | 0.988057 | 0        | 0        | 1.956869 | -1.42894 | 0        | 0        |
| YGL211W | 1153.863 | 1322.08  | 1308.187 | 1481.938 | 1423.045 | 1406.011 | 0.188059 | 1164.751 | 1223.055 |
| YKL087C | 1274.777 | 1219.24  | 1253.844 | 1202.564 | 985.1853 | 1056.709 | -0.20809 | 1036.584 | 1084.331 |
| YLR292C | 1809.101 | 1686.962 | 1603.616 | 1669.083 | 1674.239 | 1560.603 | -0.05647 | 2039.439 | 1741.076 |
| YMR072W | 5594.278 | 4941.236 | 4984.747 | 5054.708 | 5112.593 | 4400.999 | -0.09132 | 4790.546 | 4557.704 |
| YDR097C | 757.7264 | 644.724  | 775.6246 | 764.6981 | 853.8272 | 1064.537 | 0.300827 | 822.9711 | 916.6331 |
| YOR066W | 855.609  | 918.6328 | 875.4183 | 909.7579 | 995.5556 | 1138.898 | 0.200261 | 1007.353 | 1054.479 |
| YPL014W | 239.5245 | 245.2324 | 244.05   | 188.0405 | 273.0864 | 284.7245 | 0.033352 | 301.3064 | 292.3744 |
| YGR100W | 890.1558 | 866.2242 | 993.9852 | 794.2473 | 827.3252 | 889.3972 | -0.13138 | 942.1445 | 1005.311 |
| YLR128W | 223.4026 | 293.6856 | 275.6679 | 268.6293 | 239.6708 | 252.4362 | -0.05948 | 327.1647 | 323.9824 |
| YIRO24C | 360.4383 | 376.7482 | 330.011  | 379.6628 | 367.572  | 335.6031 | 0.02099  | 315.922  | 323.1044 |
| YDL053C | 1660.549 | 1659.274 | 1465.288 | 1679.829 | 1712.264 | 1392.313 | -0.00021 | 1523.396 | 1413.582 |
| YDL207W | 787.667  | 905.7778 | 852.693  | 830.0646 | 859.5885 | 947.1248 | 0.050466 | 910.6648 | 1012.335 |
| YKL061W | 329.3461 | 268.9646 | 328.0349 | 237.2892 | 205.1029 | 261.2421 | -0.39672 | 286.6908 | 254.6203 |
| YBR157C | 234.9182 | 244.2436 | 234.1695 | 142.3735 | 135.9671 | 128.1749 | -0.81126 | 115.8006 | 179.9902 |
| YDR265W | 445.6537 | 414.3241 | 351.7482 | 354.5907 | 380.2469 | 280.8108 | -0.25466 | 529.5347 | 492.5586 |
| YGR059W | 12.66716 | 17.79913 | 26.67753 | 17.01319 | 13.82716 | 7.827478 | -0.56346 | 4.49711  | 10.53601 |
| YDR189W | 1767.645 | 1495.127 | 1941.532 | 1838.32  | 1864.362 | 2262.141 | 0.196774 | 2061.925 | 1975.502 |
| YGR290W | 0        | 0        | 0        | 0        | 0        | 0        | #DIV/0!  | 3.372832 | 0        |
| YHR059W | 783.0608 | 775.2509 | 822.0633 | 787.9793 | 772.0165 | 637.9394 | -0.11504 | 712.7919 | 743.6669 |
| YHR038W | 545.8394 | 553.7506 | 518.7298 | 411.8983 | 439.0124 | 366.913  | -0.41019 | 573.3815 | 626.8928 |
| YKR050W | 522.8082 | 634.8356 | 591.846  | 617.8474 | 547.3251 | 566.5137 | -0.01476 | 432.8468 | 525.0446 |
| YNL311C | 298.254  | 335.2169 | 338.9035 | 274.0019 | 268.4774 | 337.56   | -0.14394 | 308.052  | 409.1485 |
| YBR057C | 906.2777 | 831.6148 | 862.5736 | 885.5813 | 878.0248 | 935.3836 | 0.053649 | 968.0029 | 959.6552 |
| YNL166C | 1371.508 | 1317.135 | 1544.333 | 1472.089 | 1520.988 | 1633.008 | 0.128119 | 1514.402 | 1536.502 |
| YHL028W | 125.52   | 211.6119 | 175.8741 | 216.6943 | 179.7531 | 148.7221 | 0.087729 | 168.6416 | 210.7203 |
| YCR003W | 981.1291 | 827.6594 | 823.0513 | 804.0971 | 804.2799 | 754.3732 | -0.1556  | 829.7168 | 746.3009 |
| YJR060W | 826.82   | 844.4697 | 942.6062 | 800.5153 | 785.8437 | 852.2166 | -0.10016 | 577.8786 | 719.0829 |
| YMR304W | 785.3639 | 757.4518 | 817.123  | 695.7499 | 690.2058 | 946.1464 | -0.01712 | 847.7052 | 878.8791 |
| YMR294W | 19.57652 | 24.72101 | 17.78502 | 34.92181 | 21.89301 | 16.63339 | 0.242539 | 12.36705 | 14.04802 |
| YGL163C | 477.8974 | 630.8802 | 649.1533 | 556.9581 | 549.6297 | 575.3196 | -0.06378 | 522.789  | 719.9609 |
| YDR045C | 802.6373 | 814.8045 | 900.1198 | 994.8239 | 957.5309 | 877.6559 | 0.16878  | 906.1676 | 778.787  |
| YMR087W | 165.8246 | 144.3707 | 201.5636 | 179.0862 | 156.7078 | 173.1829 | -0.00786 | 234.974  | 176.4782 |
| YOL144W | 1031.798 | 1189.575 | 959.4032 | 1314.493 | 1313.58  | 1198.583 | 0.266705 | 1119.78  | 1039.553 |
| YNL220W | 3689.598 | 4652.494 | 3909.741 | 4335.677 | 4149.301 | 3458.767 | -0.03674 | 3349.223 | 3247.726 |
| YBR254C | 523.9598 | 580.4493 | 455.4942 | 479.0556 | 517.3663 | 541.0744 | -0.02087 | 514.9191 | 386.3205 |
| YBR113W | 13.81872 | 15.82145 | 11.85668 | 17.90862 | 12.6749  | 40.11582 | 0.768695 | 15.73988 | 26.34003 |
| YLR172C | 3977.488 | 3864.388 | 3729.915 | 3966.759 | 3963.786 | 3220.029 | -0.05349 | 3865.266 | 3350.452 |
| YDL084W | 8771.432 | 7940.389 | 8853.977 | 8271.992 | 8204.116 | 8825.481 | -0.01499 | 7886.807 | 7653.535 |
| YNL267W | 1264.413 | 1413.053 | 1400.077 | 1258.976 | 1491.029 | 1781.73  | 0.152364 | 1417.714 | 1650.642 |
| YGL155W | 760.0296 | 717.8982 | 621.4877 | 727.9854 | 682.14   | 789.5968 | 0.067334 | 863.4451 | 771.7629 |
| YDR209C | 635.6611 | 444.9782 | 483.1598 | 637.5469 | 498.9301 | 505.8507 | 0.070687 | 464.3266 | 352.0784 |



|         |          |          |          |          |          |          |          |          |          |
|---------|----------|----------|----------|----------|----------|----------|----------|----------|----------|
| YDR197W | 485.9583 | 511.2305 | 424.8644 | 494.2779 | 504.6914 | 435.4034 | 0.012445 | 464.3266 | 417.0505 |
| YDL055C | 30872.17 | 24083.21 | 32402.34 | 31662.44 | 31239.01 | 32558.39 | 0.127959 | 33494.47 | 31845.98 |
| YOR104W | 133.581  | 223.4779 | 168.9577 | 206.8446 | 140.5761 | 225.04   | 0.122068 | 122.5462 | 142.2362 |
| YOR116C | 1695.096 | 1951.971 | 2020.576 | 2140.976 | 2326.42  | 2457.828 | 0.289112 | 1641.445 | 1871.02  |
| YLR047C | 211.887  | 297.641  | 238.1217 | 217.5897 | 183.2099 | 289.6167 | -0.1149  | 229.3526 | 370.5165 |
| YCR073C | 605.7205 | 545.8399 | 544.4193 | 499.6505 | 585.3498 | 651.6375 | 0.034178 | 683.5607 | 588.2607 |
| YPR011C | 492.8677 | 434.101  | 544.4193 | 468.3104 | 425.1852 | 358.1071 | -0.2334  | 383.3786 | 403.8805 |
| YLR438W | 3939.487 | 4621.84  | 3701.261 | 3764.392 | 3341.564 | 2926.498 | -0.28959 | 3786.567 | 3094.954 |
| YBR293W | 409.9553 | 545.8399 | 395.2227 | 320.5643 | 460.9054 | 268.0911 | -0.36426 | 308.052  | 263.4003 |
| YGR168C | 363.8929 | 297.641  | 273.6917 | 300.8648 | 282.3045 | 281.7892 | -0.11268 | 359.7688 | 352.9564 |
| YPR113W | 4575.148 | 4376.608 | 4082.651 | 4376.867 | 4529.548 | 3849.162 | -0.0312  | 5817.012 | 4565.606 |
| YPL042C | 603.4174 | 761.4071 | 766.7321 | 674.2596 | 626.8313 | 668.2709 | -0.11418 | 643.0867 | 755.0809 |
| YKL006W | 34646.98 | 24420.4  | 30933.1  | 33944.89 | 31433.75 | 29857.91 | 0.081583 | 34769.41 | 27292.66 |
| YLR431C | 406.5007 | 441.0228 | 385.3422 | 379.6628 | 421.7284 | 447.1447 | 0.018222 | 283.3179 | 353.8344 |
| YOR197W | 2175.297 | 2283.233 | 2139.143 | 2115.008 | 2155.885 | 2324.761 | -0.00044 | 2526.251 | 2288.949 |
| YKL054C | 4332.168 | 3682.442 | 4592.488 | 4810.255 | 5102.223 | 6019.33  | 0.337674 | 3206.439 | 4390.005 |
| YOR020C | 5931.685 | 4514.057 | 5400.719 | 5360.946 | 5127.572 | 5005.672 | -0.03243 | 8483.798 | 6863.334 |
| YPL100W | 434.1381 | 458.822  | 496.9926 | 418.1663 | 409.0535 | 527.3763 | -0.03717 | 516.0434 | 535.5807 |
| YIL038C | 1811.404 | 1759.147 | 1865.451 | 2026.36  | 2148.971 | 2666.235 | 0.331781 | 1998.965 | 2463.671 |
| YFR031C | 543.5363 | 569.5721 | 574.061  | 641.1286 | 668.3128 | 851.2382 | 0.35688  | 674.5665 | 757.7149 |
| YDR424C | 642.5704 | 583.4159 | 661.01   | 617.8474 | 712.0988 | 685.8827 | 0.095282 | 674.5665 | 541.7267 |
| YKL004W | 1968.016 | 2467.157 | 1900.033 | 2367.52  | 2514.239 | 1784.665 | 0.073521 | 2021.451 | 1891.214 |
| YOR393W | 0        | 0        | 0        | 0        | 0        | 0        | #DIV/0!  | 1.124277 | 0.878001 |
| YLR402W | 70.24516 | 95.91752 | 56.31924 | 81.48422 | 54.15638 | 59.68452 | -0.18781 | 37.10116 | 40.38805 |
| YLR342W | 163.5215 | 129.5381 | 82.99677 | 134.3147 | 149.7943 | 103.7141 | 0.044449 | 125.9191 | 86.04411 |
| YMR078C | 915.4902 | 824.6929 | 896.1675 | 861.4046 | 859.5885 | 1107.588 | 0.101536 | 629.5954 | 739.2769 |
| YGR188C | 393.8335 | 312.4736 | 314.2021 | 299.9694 | 360.6585 | 509.7645 | 0.197703 | 248.4653 | 305.5444 |
| YER036C | 12145.5  | 12209.21 | 12078.99 | 13173.58 | 13483.79 | 13216.7  | 0.130177 | 12170.3  | 11925.01 |
| YER090W | 2847.808 | 2502.755 | 2730.989 | 2603.913 | 2691.687 | 2895.188 | 0.01937  | 2915.252 | 2849.991 |
| YKL127W | 1935.772 | 1958.893 | 2169.773 | 2000.393 | 2276.873 | 2175.06  | 0.089445 | 2145.121 | 2208.173 |
| YOR011W | 178.4918 | 273.9088 | 211.4442 | 226.544  | 261.5638 | 281.7892 | 0.21382  | 139.4104 | 143.9922 |
| YJL161W | 157.7637 | 259.0762 | 184.7666 | 162.073  | 140.5761 | 174.1614 | -0.3354  | 305.8035 | 300.2764 |
| YPL020C | 468.6849 | 481.5653 | 413.0078 | 483.5328 | 415.9671 | 546.945  | 0.085453 | 544.1503 | 557.5307 |
| YDR440W | 368.4992 | 353.016  | 425.8525 | 380.5582 | 359.5062 | 455.9506 | 0.059908 | 437.3439 | 474.1206 |
| YEL028W | 65.63892 | 77.12955 | 67.18786 | 74.32078 | 63.37449 | 34.24522 | -0.28818 | 91.06648 | 87.80011 |
| YLR327C | 474.4427 | 547.8176 | 344.8318 | 196.0994 | 137.1194 | 90.01599 | -1.69158 | 430.5983 | 398.6125 |
| YHR176W | 310.9212 | 316.4289 | 346.8079 | 288.3288 | 312.2634 | 276.897  | -0.15077 | 263.0809 | 257.2543 |
| YLR045C | 1091.679 | 939.3984 | 1145.158 | 999.301  | 1144.198 | 1344.369 | 0.135028 | 1115.283 | 1292.418 |
| YDL086W | 852.1544 | 788.1058 | 929.7615 | 1024.373 | 917.2017 | 927.5561 | 0.158833 | 867.9422 | 806.883  |
| YDR537C | 2.30312  | 2.966521 | 1.976114 | 4.477155 | 4.609054 | 0.978435 | 0.474088 | 4.49711  | 7.024009 |
| YDR260C | 631.0548 | 654.6124 | 574.061  | 660.8281 | 511.605  | 581.1902 | -0.08475 | 697.052  | 642.6968 |
| YDR379W | 930.4604 | 806.8938 | 949.5226 | 864.9864 | 975.9672 | 1179.014 | 0.168603 | 921.9075 | 1062.381 |
| YDR530C | 1015.676 | 1120.356 | 986.0807 | 1002.883 | 907.9836 | 869.8285 | -0.16708 | 910.6648 | 847.271  |
| YML003W | 49.51708 | 31.64289 | 41.49839 | 38.50353 | 50.69959 | 82.18852 | 0.482651 | 58.46243 | 80.7761  |
| YDR114C | 0        | 0.98884  | 0        | 6.268017 | 0        | 1.956869 | 3.056186 | 1.124277 | 0        |
| YNR061C | 996.0993 | 1008.617 | 920.869  | 926.7711 | 1012.84  | 862.9794 | -0.06196 | 1201.853 | 928.0471 |
| YBL003C | 17507.17 | 13083.35 | 15805.95 | 16270.88 | 15907    | 15017.02 | 0.024616 | 15666.81 | 13012.85 |
| YMR035W | 368.4992 | 462.7773 | 367.5571 | 374.2902 | 329.5474 | 330.7109 | -0.21263 | 313.6734 | 288.8624 |
| YPR061C | 208.4323 | 268.9646 | 221.3247 | 166.5502 | 170.535  | 140.8946 | -0.54777 | 105.6821 | 148.3822 |
| YCL064C | 3476.559 | 5078.684 | 3850.457 | 4040.185 | 3750.618 | 3286.562 | -0.16339 | 4522.968 | 4539.266 |
| YGR027C | 25492.08 | 19736.27 | 21881.51 | 23221.21 | 23407.08 | 20782.93 | 0.006464 | 25944.95 | 20412.65 |
| YNL071W | 6848.327 | 6125.866 | 6742.5   | 6608.281 | 6261.4   | 6142.613 | -0.05249 | 6899.691 | 7486.715 |
| YKL165C | 1220.654 | 1221.218 | 1215.31  | 1206.146 | 1211.029 | 1548.862 | 0.116966 | 1345.76  | 1523.332 |
| YIL036W | 792.2732 | 715.9205 | 737.0904 | 671.5733 | 655.6379 | 668.2709 | -0.17016 | 740.8989 | 764.7389 |

|           |          |          |          |          |          |          |          |          |          |
|-----------|----------|----------|----------|----------|----------|----------|----------|----------|----------|
| YOR176W   | 2092.384 | 2148.75  | 2226.092 | 2009.347 | 2026.831 | 1811.083 | -0.14539 | 1784.228 | 1762.148 |
| YML034C-1 | 1.15156  | 0        | 0        | 0        | 1.152263 | 1.956869 | 1.432923 | 6.745665 | 2.634003 |
| YDL144C   | 1149.257 | 1180.675 | 1089.827 | 1125.557 | 973.6626 | 847.3245 | -0.21487 | 1002.856 | 927.1691 |
| YPR008W   | 1384.175 | 1323.068 | 1537.416 | 1485.52  | 1423.045 | 1643.77  | 0.100958 | 1495.289 | 1684.884 |
| YML063W   | 41224.69 | 35178.99 | 38328.7  | 41011.64 | 39831.44 | 38263.65 | 0.053982 | 42284.08 | 36187.69 |
| YNL139C   | 570.0222 | 473.6546 | 633.3444 | 558.749  | 660.247  | 813.0792 | 0.277053 | 564.3873 | 820.053  |
| YJL096W   | 1204.532 | 1044.215 | 1157.015 | 985.8696 | 1040.494 | 1007.788 | -0.16668 | 1153.509 | 958.7772 |
| YKL095W   | 170.4309 | 177.9913 | 210.4561 | 250.7207 | 233.9095 | 287.6598 | 0.466609 | 186.6301 | 282.7163 |
| YDL103C   | 1407.206 | 1307.247 | 1460.348 | 1484.625 | 1418.436 | 1713.239 | 0.14503  | 1614.462 | 1618.156 |
| YIRO23W   | 551.5972 | 556.7172 | 676.8189 | 616.0565 | 670.6173 | 793.5106 | 0.22068  | 617.2283 | 762.9829 |
| YMR281W   | 419.1678 | 371.804  | 392.2586 | 359.9633 | 364.1153 | 254.393  | -0.27413 | 440.7168 | 417.9285 |
| YOL033W   | 513.5957 | 514.197  | 430.7928 | 417.2709 | 391.7696 | 444.2094 | -0.2189  | 415.9827 | 388.0765 |
| YNL044W   | 1093.982 | 1157.932 | 1077.97  | 998.4056 | 1107.325 | 1054.753 | -0.07533 | 1012.974 | 871.8551 |
| YGR156W   | 734.6952 | 823.7041 | 701.5203 | 723.5083 | 640.6585 | 737.7398 | -0.10457 | 522.789  | 598.7967 |
| YDR384C   | 1459.026 | 1506.993 | 1280.522 | 1447.912 | 1372.346 | 1044.968 | -0.13574 | 1056.821 | 1176.521 |
| YDR239C   | 549.2941 | 494.4202 | 521.694  | 459.3561 | 587.6544 | 673.1631 | 0.136015 | 575.6301 | 680.4508 |
| YDR325W   | 701.3    | 670.4338 | 628.4041 | 688.5865 | 707.4898 | 740.6751 | 0.095319 | 550.896  | 562.7987 |
| YGL242C   | 927.0058 | 890.9452 | 885.2989 | 950.9477 | 836.5433 | 916.7933 | 0.000552 | 869.0665 | 792.835  |
| YDR473C   | 477.8974 | 421.246  | 381.3899 | 450.4018 | 386.0083 | 394.3092 | -0.05724 | 460.9538 | 475.8766 |
| YPL224C   | 718.5734 | 746.5745 | 680.7712 | 577.553  | 655.6379 | 585.104  | -0.23901 | 776.8757 | 737.5209 |
| YNL140C   | 1.15156  | 4.944202 | 6.916398 | 7.163448 | 4.609054 | 4.892174 | 0.356933 | 2.248555 | 3.512004 |
| YER176W   | 1271.322 | 1202.43  | 1389.208 | 1378.964 | 1540.576 | 1530.272 | 0.204038 | 1313.156 | 1597.084 |
| YNL297C   | 1001.857 | 754.4853 | 920.869  | 782.6067 | 962.14   | 1084.106 | 0.079486 | 943.2688 | 1086.965 |
| YJL183W   | 1943.833 | 1998.447 | 2043.302 | 2095.309 | 2132.84  | 2089.937 | 0.077996 | 1953.994 | 1752.49  |
| YMR285C   | 865.9731 | 1047.182 | 902.0959 | 985.8696 | 1033.58  | 983.3269 | 0.093034 | 1086.052 | 1053.601 |
| YOR149C   | 353.5289 | 467.7215 | 496.0045 | 470.1013 | 504.6914 | 442.2525 | 0.105351 | 378.8815 | 406.5145 |
| YHR124W   | 87.51856 | 172.0582 | 104.734  | 162.9684 | 169.3827 | 78.27478 | 0.172655 | 85.44509 | 96.58012 |
| YMR201C   | 719.725  | 787.117  | 683.7353 | 742.3123 | 710.9466 | 571.4059 | -0.11363 | 556.5174 | 555.7747 |
| YMR218C   | 426.0772 | 485.5207 | 569.1207 | 508.6048 | 623.3745 | 708.3867 | 0.313695 | 568.8844 | 686.5968 |
| YDR091C   | 3205.943 | 3510.384 | 3696.321 | 3942.583 | 4257.614 | 4561.463 | 0.293479 | 4205.922 | 4444.441 |
| YCR107W   | 588.4471 | 539.9069 | 583.9416 | 533.6769 | 551.9342 | 605.6511 | -0.01783 | 493.5578 | 507.4846 |
| YDL018C   | 590.7502 | 566.6056 | 604.6908 | 579.3439 | 573.8272 | 569.449  | -0.03265 | 537.4046 | 519.7766 |
| YOL130W   | 1259.807 | 1335.923 | 1281.51  | 1329.715 | 1378.107 | 1792.492 | 0.214996 | 1309.783 | 1733.174 |
| YAL043C   | 1927.711 | 2000.424 | 2116.418 | 2026.36  | 1927.737 | 2063.519 | -0.00644 | 1945     | 2195.881 |
| YDR299W   | 2565.676 | 2669.869 | 2649.968 | 3063.27  | 3372.675 | 3456.81  | 0.327168 | 3436.916 | 3257.384 |
| YOR363C   | 456.0177 | 476.6211 | 480.1956 | 366.2313 | 440.1646 | 447.1447 | -0.17258 | 408.1127 | 490.8026 |
| YKL215C   | 310.9212 | 450.9112 | 415.9719 | 283.8516 | 347.9836 | 433.4466 | -0.14486 | 436.2197 | 469.7306 |
| YOR008C   | 2303.12  | 2407.826 | 2468.166 | 2381.847 | 2494.65  | 2412.82  | 0.021978 | 2382.344 | 2713.023 |
| YGL161C   | 1810.252 | 1705.75  | 1919.794 | 1793.548 | 1754.897 | 1796.406 | -0.02434 | 2158.613 | 1936.87  |
| YER017C   | 1535.029 | 1969.77  | 1892.129 | 1652.07  | 1705.35  | 1730.851 | -0.08496 | 1407.595 | 1560.208 |
| YBL001C   | 1867.83  | 1539.625 | 1761.705 | 1547.305 | 1573.992 | 1556.69  | -0.14404 | 1838.194 | 1548.794 |
| YGL049C   | 1788.373 | 1632.576 | 1962.281 | 1875.928 | 1829.794 | 2379.553 | 0.176851 | 2051.806 | 2102.813 |
| YDR112W   | 11.5156  | 13.84377 | 10.86863 | 8.058879 | 3.45679  | 5.870608 | -1.05916 | 23.60983 | 10.53601 |
| YDR252W   | 161.2184 | 177.9913 | 132.3996 | 149.537  | 137.1194 | 138.9377 | -0.14811 | 204.6185 | 174.7222 |
| YOR193W   | 245.2823 | 206.6677 | 215.3964 | 195.204  | 178.6008 | 170.2476 | -0.29469 | 167.5173 | 155.4062 |
| YLR103C   | 489.413  | 469.6992 | 501.9329 | 499.6505 | 435.5556 | 607.608  | 0.078564 | 503.6763 | 551.3847 |
| YLR175W   | 7479.382 | 8057.072 | 7701.903 | 8127.827 | 7984.034 | 7160.185 | 0.00209  | 7641.714 | 7000.303 |
| YER094C   | 3793.238 | 3470.83  | 3492.781 | 3541.43  | 3438.354 | 3106.53  | -0.09286 | 4219.413 | 3751.699 |
| YJL204C   | 321.2852 | 358.9491 | 301.3573 | 347.4272 | 388.3128 | 471.6055 | 0.298644 | 337.2832 | 460.0726 |
| YDL016C   | 230.312  | 197.7681 | 186.7427 | 196.9948 | 243.1276 | 191.7732 | 0.039516 | 210.2399 | 161.5522 |
| YMR233W   | 532.0207 | 454.8666 | 465.3748 | 522.9317 | 482.7984 | 487.2605 | 0.039903 | 447.4624 | 351.2004 |
| YDL160C-1 | 392.6819 | 305.5517 | 304.3215 | 307.1328 | 389.4651 | 312.1207 | 0.008842 | 339.5318 | 254.6203 |
| YBL046W   | 693.2391 | 711.9651 | 671.8786 | 716.3448 | 662.5515 | 572.3843 | -0.09014 | 725.159  | 716.4489 |
| YIL155C   | 360.4383 | 486.5095 | 383.366  | 224.7532 | 235.0617 | 218.1909 | -0.85966 | 294.5607 | 367.8825 |

|                       |          |          |          |          |          |          |          |          |          |
|-----------------------|----------|----------|----------|----------|----------|----------|----------|----------|----------|
| YJR109C               | 997.2509 | 1067.948 | 1005.842 | 858.7184 | 857.284  | 1088.019 | -0.13123 | 1039.957 | 1056.235 |
| YDR184C               | 1045.616 | 970.0525 | 1131.325 | 1163.165 | 1230.617 | 1083.127 | 0.143831 | 934.2746 | 981.6052 |
| YPL064C               | 1098.588 | 1105.524 | 952.4868 | 968.8564 | 864.1976 | 779.8125 | -0.27274 | 902.7948 | 780.543  |
| YNL240C               | 994.9478 | 1172.765 | 1002.878 | 1239.277 | 1132.675 | 978.4347 | 0.079576 | 1003.98  | 889.4151 |
| YHR113W               | 1736.552 | 1633.564 | 1651.043 | 1664.606 | 1633.91  | 1511.682 | -0.06192 | 1915.769 | 1748.978 |
| YDL035C               | 731.2406 | 718.887  | 772.6604 | 806.7834 | 792.7573 | 883.5265 | 0.159753 | 584.6243 | 749.8129 |
| YLR058C               | 12063.74 | 15173.76 | 12551.29 | 15894.8  | 16008.4  | 14713.7  | 0.228491 | 11102.24 | 10214.66 |
| YIL132C               | 200.3714 | 202.7123 | 205.5158 | 206.8446 | 280      | 182.9673 | 0.138263 | 121.422  | 157.1622 |
| YOR161C- <del>C</del> | 11.5156  | 21.75449 | 15.80891 | 11.6406  | 3.45679  | 8.805912 | -1.0379  | 2.248555 | 7.024009 |
| YIL069C               | 15941.04 | 14717.9  | 14617.31 | 16315.65 | 16254.98 | 13853.66 | 0.036125 | 15730.89 | 14472.97 |
| YNL250W               | 309.7696 | 318.4066 | 366.5691 | 346.5318 | 351.4404 | 475.5193 | 0.238408 | 363.1416 | 412.6605 |
| YNR070W               | 66.79048 | 158.2145 | 110.6624 | 85.06595 | 116.3786 | 125.2396 | -0.03914 | 148.4046 | 194.0382 |
| YKL036C               | 0        | 0        | 0        | 0        | 0        | 0        | #DIV/0!  | 1.124277 | 2.634003 |
| YFL010C               | 1483.209 | 1405.142 | 1529.512 | 1654.757 | 1562.469 | 1281.749 | 0.026248 | 1579.61  | 1602.352 |
| YNL076W               | 1247.139 | 1041.249 | 1171.835 | 1185.551 | 1200.659 | 1284.685 | 0.085266 | 937.6474 | 1042.187 |
| YDR214W               | 3493.833 | 3454.02  | 3578.742 | 3237.879 | 3315.062 | 3021.406 | -0.13679 | 2988.33  | 3078.272 |
| YHR032W- <del>f</del> | 140.4903 | 134.4823 | 137.3399 | 162.073  | 135.9671 | 139.9162 | 0.087049 | 154.026  | 86.04411 |
| YPR046W               | 230.312  | 269.9534 | 248.9903 | 266.8384 | 283.4568 | 201.5576 | 0.004992 | 205.7428 | 196.6722 |
| YIL071W- <del>f</del> | 11.5156  | 15.82145 | 10.86863 | 17.90862 | 5.761317 | 3.913739 | -0.46997 | 3.372832 | 4.390005 |
| YBR070C               | 632.2064 | 498.3756 | 528.6104 | 607.9977 | 535.8025 | 540.096  | 0.021322 | 490.185  | 494.3146 |
| YDR179C               | 234.9182 | 162.1698 | 198.5994 | 245.3481 | 221.2346 | 150.6789 | 0.051326 | 182.133  | 191.4042 |
| YPR060C               | 1812.555 | 1774.969 | 1839.762 | 1972.635 | 2023.375 | 1809.126 | 0.097099 | 1659.434 | 1711.224 |
| YBR256C               | 1126.226 | 1127.278 | 1108.6   | 1027.059 | 1031.276 | 1203.475 | -0.04369 | 1459.312 | 1213.397 |
| YPL050C               | 4363.261 | 4363.753 | 4219.003 | 4921.289 | 4871.77  | 4814.877 | 0.174244 | 4046.275 | 4375.079 |
| YCR065W               | 1280.535 | 1129.256 | 1288.426 | 1372.696 | 1470.288 | 1614.417 | 0.269373 | 985.9913 | 1071.161 |
| YJR147W               | 518.202  | 618.0253 | 520.7059 | 540.8403 | 504.6914 | 518.5704 | -0.08318 | 527.2861 | 437.2445 |
| YBL109W               | 0        | 0        | 0        | 0        | 5.761317 | 0        | #DIV/0!  | 0        | 0        |
| YER065C               | 485.9583 | 512.2193 | 474.2673 | 421.748  | 369.8766 | 404.0935 | -0.30034 | 472.1965 | 492.5586 |
| YGR198W               | 1485.512 | 1636.531 | 1714.279 | 1520.442 | 1602.798 | 1584.086 | -0.039   | 1520.023 | 1812.194 |
| YJR137C               | 1447.511 | 1882.752 | 1659.935 | 1712.064 | 1841.317 | 2238.659 | 0.214974 | 1458.188 | 1561.086 |
| YHR079C               | 646.0251 | 546.8288 | 749.9351 | 630.3834 | 623.3745 | 814.0577 | 0.089978 | 674.5665 | 813.029  |
| YDL045C               | 684.0266 | 702.0767 | 676.8189 | 648.2921 | 725.926  | 663.3787 | -0.01782 | 834.2139 | 776.1529 |
| YNL101W               | 959.2494 | 1063.992 | 911.9765 | 936.6209 | 909.1359 | 1231.849 | 0.068341 | 996.1098 | 1106.281 |
| YLR211C               | 195.7652 | 163.1587 | 182.7905 | 153.1187 | 206.2552 | 148.7221 | -0.09243 | 230.4769 | 238.8163 |
| YOR237W               | 39.15304 | 47.46434 | 39.52227 | 55.51672 | 29.95885 | 33.26678 | -0.08719 | 31.47977 | 15.80402 |
| YBR174C               | 0        | 2.966521 | 1.976114 | 0.895431 | 0        | 0        | -2.46463 | 4.49711  | 1.756002 |
| YBR091C               | 634.5095 | 682.2999 | 673.8548 | 751.2666 | 691.3581 | 618.3707 | 0.050091 | 721.7861 | 524.1666 |
| YDR393W               | 840.6388 | 825.6818 | 732.1501 | 727.09   | 727.0782 | 704.473  | -0.15199 | 656.578  | 720.8389 |
| YBR023C               | 1675.52  | 1972.737 | 2109.501 | 2070.237 | 2168.56  | 2812.021 | 0.292284 | 2083.286 | 2482.987 |
| YLR107W               | 722.0281 | 609.1257 | 593.8222 | 640.2332 | 610.6996 | 522.4841 | -0.11831 | 512.6705 | 532.9467 |
| YML104C               | 456.0177 | 452.8889 | 524.6582 | 467.415  | 478.1893 | 579.2334 | 0.089049 | 521.6648 | 552.2627 |
| YDL115C               | 610.3268 | 510.2417 | 472.2912 | 508.6048 | 535.8025 | 472.584  | -0.07041 | 626.2226 | 618.9908 |
| YLR194C               | 1760.735 | 1932.194 | 1668.828 | 1841.006 | 1646.584 | 1385.464 | -0.13788 | 1961.864 | 1775.318 |
| YIL146C               | 194.6136 | 231.3887 | 211.4442 | 211.3217 | 176.2963 | 159.4849 | -0.22049 | 245.0925 | 290.6184 |
| YKR067W               | 680.5719 | 584.4047 | 588.8819 | 419.9572 | 452.8395 | 520.5273 | -0.412   | 619.4769 | 640.9408 |
| YLR256W               | 1744.613 | 1658.285 | 1845.69  | 1561.632 | 1515.226 | 1868.81  | -0.08576 | 1656.061 | 1890.336 |
| YGL124C               | 392.6819 | 316.4289 | 400.163  | 396.6759 | 434.4033 | 414.8563 | 0.167614 | 341.7804 | 333.6404 |
| YLR200W               | 2003.714 | 1478.316 | 1667.84  | 1868.765 | 1896.626 | 1684.865 | 0.081787 | 1702.156 | 1477.676 |
| YLR355C               | 17286.07 | 19615.63 | 17944.1  | 19198.04 | 18458.11 | 18419.03 | 0.031981 | 19271.24 | 18739.18 |
| YOR195W               | 746.2108 | 478.5988 | 737.0904 | 718.1357 | 815.8025 | 1038.119 | 0.390671 | 711.6676 | 975.4592 |
| YCL061C               | 713.9672 | 555.7283 | 775.6246 | 691.2728 | 751.2758 | 989.1975 | 0.249666 | 724.0347 | 892.9271 |
| YPL008W               | 484.8067 | 540.8957 | 619.5116 | 510.3957 | 487.4074 | 614.457  | -0.02919 | 546.3989 | 640.0628 |
| YCR020C- <del>f</del> | 298.254  | 249.1878 | 284.5604 | 349.2181 | 290.3704 | 276.897  | 0.139525 | 351.8989 | 325.7384 |
| YLL038C               | 253.3432 | 321.3731 | 220.3367 | 299.074  | 342.2223 | 437.3603 | 0.440113 | 284.4422 | 422.3185 |

|           |          |          |          |          |          |          |          |          |          |
|-----------|----------|----------|----------|----------|----------|----------|----------|----------|----------|
| YJL091C   | 528.566  | 538.918  | 592.8341 | 667.9915 | 683.2922 | 672.1846 | 0.285371 | 684.685  | 631.2828 |
| YKR063C   | 647.1767 | 701.0879 | 656.0697 | 610.684  | 674.0741 | 644.7885 | -0.05486 | 793.7399 | 759.4709 |
| YOR384W   | 225.7057 | 232.3775 | 280.6081 | 252.5115 | 256.9548 | 342.4522 | 0.205744 | 286.6908 | 414.4165 |
| YER097W   | 2.30312  | 5.933043 | 1.976114 | 0        | 1.152263 | 0        | -3.14776 | 2.248555 | 1.756002 |
| YDR232W   | 4099.553 | 5576.071 | 4186.397 | 4958.002 | 4595.227 | 3776.758 | -0.05646 | 3919.231 | 3787.697 |
| YOR251C   | 1456.723 | 1464.473 | 1503.822 | 1415.676 | 1449.547 | 1211.302 | -0.11834 | 1427.832 | 1270.468 |
| YNL300W   | 3266.976 | 3096.059 | 3112.379 | 3399.056 | 3725.268 | 3141.754 | 0.115624 | 3035.549 | 2734.973 |
| YGR197C   | 749.6655 | 1012.573 | 827.0036 | 732.4626 | 758.1894 | 714.2573 | -0.23181 | 762.2601 | 726.9849 |
| YCR008W   | 1925.408 | 1789.801 | 1894.105 | 2004.87  | 2038.354 | 1935.344 | 0.091976 | 1948.373 | 1912.286 |
| YNL093W   | 154.309  | 189.8574 | 120.5429 | 190.7268 | 138.2716 | 120.3475 | -0.0485  | 166.3931 | 143.1142 |
| YER121W   | 178.4918 | 180.9578 | 167.9697 | 52.83043 | 109.465  | 93.92973 | -1.04154 | 119.1734 | 129.9442 |
| YBR106W   | 14102    | 12003.53 | 13729.05 | 14684.17 | 13692.35 | 12677.58 | 0.043505 | 14561.64 | 11541.32 |
| YGL097W   | 2967.57  | 3224.609 | 3065.94  | 3257.578 | 3275.885 | 3102.616 | 0.057727 | 2987.205 | 2816.627 |
| YGL230C   | 34.5468  | 39.55362 | 23.71336 | 44.77155 | 36.87243 | 20.54713 | 0.06316  | 20.23699 | 19.31602 |
| YLR312C   | 36.84992 | 33.62057 | 21.73725 | 26.86293 | 4.609054 | 36.20208 | -0.44628 | 8.99422  | 20.19402 |
| YPR137W   | 2314.635 | 2286.199 | 2233.008 | 2692.561 | 2778.107 | 3063.479 | 0.32055  | 2575.72  | 2108.081 |
| YNL010W   | 4911.403 | 3845.6   | 4431.435 | 4473.573 | 4461.564 | 4274.781 | 0.002348 | 5485.35  | 4791.252 |
| YGR218W   | 2893.87  | 2646.137 | 2769.523 | 2770.464 | 2908.313 | 3193.611 | 0.094555 | 2934.364 | 3332.892 |
| YOL095C   | 262.5557 | 247.2101 | 254.9187 | 234.6029 | 276.5432 | 283.7461 | 0.055895 | 335.0347 | 333.6404 |
| YDL051W   | 2402.154 | 2594.717 | 2797.189 | 2765.986 | 2797.696 | 2903.016 | 0.119424 | 3028.804 | 2949.206 |
| YOR026W   | 669.0563 | 735.6973 | 638.2847 | 634.8606 | 710.9466 | 583.1471 | -0.0829  | 601.4885 | 539.0927 |
| YBR283C   | 5891.381 | 6439.329 | 5646.745 | 6106.84  | 6077.038 | 5090.796 | -0.05753 | 5950.801 | 5319.809 |
| YBL005W   | 502.0801 | 534.9627 | 545.4074 | 459.3561 | 485.1029 | 620.3276 | -0.01619 | 427.2254 | 375.7845 |
| YHR090C   | 625.297  | 559.6837 | 661.01   | 510.3957 | 555.391  | 498.0233 | -0.23933 | 522.789  | 487.2906 |
| YER032W   | 846.3966 | 698.1213 | 1000.902 | 840.8097 | 1049.712 | 1308.167 | 0.329577 | 916.2861 | 1106.281 |
| YHR214C-I | 0        | 0        | 0        | 0        | 0        | 0        | #DIV/0!  | 0        | 0        |
| YHR138C   | 655.2376 | 584.4047 | 549.3596 | 513.082  | 502.3869 | 401.1582 | -0.33669 | 764.5087 | 715.5709 |
| YGR166W   | 557.355  | 605.1703 | 607.6549 | 615.1611 | 587.6544 | 700.5593 | 0.104663 | 703.7977 | 612.8447 |
| YOR147W   | 434.1381 | 461.7885 | 508.8493 | 428.9115 | 525.4321 | 433.4466 | -0.01755 | 596.9913 | 586.5047 |
| YDL111C   | 1521.211 | 1906.484 | 1582.867 | 1827.575 | 1680     | 1406.011 | -0.0282  | 1482.922 | 1362.658 |
| YER048W-I | 1642.124 | 1503.037 | 1579.903 | 1418.363 | 1603.951 | 1402.097 | -0.09485 | 1581.858 | 1453.97  |
| YMR066W   | 355.832  | 313.4624 | 386.3302 | 392.1988 | 335.3087 | 463.7781 | 0.174422 | 384.5029 | 496.0706 |
| YHR186C   | 629.9033 | 732.7308 | 891.2273 | 833.6463 | 752.428  | 990.1759 | 0.192874 | 915.1619 | 890.2931 |
| YGR042W   | 720.8765 | 612.0922 | 573.073  | 669.7824 | 648.7243 | 675.12   | 0.064816 | 598.1156 | 514.5086 |
| YAL027W   | 203.8261 | 196.7792 | 221.3247 | 159.3867 | 200.4938 | 176.1182 | -0.21452 | 268.7023 | 238.8163 |
| YDR465C   | 2082.02  | 2144.795 | 2215.223 | 2427.514 | 2288.395 | 2347.265 | 0.132799 | 2113.642 | 2163.395 |
| YDR182W-I | 8.06092  | 10.87724 | 13.8328  | 9.849741 | 5.761317 | 9.784347 | -0.36785 | 23.60983 | 27.21803 |
| YMR091C   | 1298.96  | 1378.444 | 1330.913 | 1363.741 | 1274.403 | 1333.607 | -0.01322 | 1213.095 | 1552.306 |
| YAL014C   | 945.4307 | 890.9452 | 787.4813 | 935.7254 | 931.0289 | 751.4379 | -0.00312 | 943.2688 | 1079.941 |
| YDL081C   | 38455.19 | 28197.77 | 31893.49 | 34712.28 | 34675.06 | 33100.45 | 0.056576 | 39249.65 | 31082.99 |
| YKR007W   | 1042.162 | 862.2689 | 840.8364 | 883.7904 | 755.8848 | 702.5161 | -0.22909 | 1081.555 | 991.2632 |
| YNL168C   | 696.6938 | 864.2465 | 867.5139 | 821.1103 | 808.889  | 838.5186 | 0.023607 | 1011.85  | 986.8732 |
| YJR069C   | 1797.585 | 1692.895 | 1714.279 | 2026.36  | 1828.642 | 1691.714 | 0.091803 | 1694.286 | 1558.452 |
| YJL187C   | 979.9775 | 763.3848 | 1054.257 | 882.895  | 1010.535 | 1344.369 | 0.210814 | 973.6243 | 1123.841 |
| YEL022W   | 1194.168 | 1205.396 | 1464.3   | 1383.441 | 1456.461 | 1642.792 | 0.214322 | 1503.159 | 1635.716 |
| YMR283C   | 498.6255 | 547.8176 | 469.327  | 584.7165 | 450.535  | 510.7429 | 0.028484 | 403.6156 | 426.7085 |
| YPL138C   | 503.2317 | 543.8622 | 450.5539 | 464.7287 | 505.8437 | 455.9506 | -0.0702  | 417.1069 | 404.7585 |
| YNL190W   | 4302.228 | 4877.95  | 4590.512 | 5057.394 | 4936.297 | 4949.901 | 0.117926 | 5456.119 | 5505.067 |
| YPR087W   | 6.90936  | 2.966521 | 4.940284 | 4.477155 | 10.37037 | 1.956869 | 0.181667 | 12.36705 | 18.43802 |
| YMR141C   | 117.4591 | 69.21883 | 81.02066 | 78.79793 | 84.11523 | 77.29634 | -0.15632 | 114.6763 | 98.33612 |
| YMR306C-I | 19.57652 | 5.933043 | 9.880568 | 9.849741 | 2.304527 | 2.935304 | -1.2298  | 4.49711  | 0.878001 |
| YGL220W   | 1765.341 | 1627.631 | 1525.56  | 1690.574 | 1867.819 | 1508.746 | 0.042944 | 1759.494 | 1391.632 |
| YDR458C   | 806.092  | 856.3358 | 955.451  | 1004.674 | 898.7655 | 1123.243 | 0.209339 | 1030.962 | 1050.089 |
| YLL027W   | 1931.166 | 2060.743 | 1835.81  | 1894.732 | 1699.589 | 1393.291 | -0.22458 | 1548.13  | 1424.996 |

|           |          |          |          |          |          |          |          |          |          |
|-----------|----------|----------|----------|----------|----------|----------|----------|----------|----------|
| YDL156W   | 131.2778 | 119.6497 | 185.7547 | 128.0466 | 165.9259 | 234.8243 | 0.27613  | 130.4162 | 180.8682 |
| YMR096W   | 282.1322 | 369.8263 | 289.5006 | 276.6882 | 246.5844 | 280.8108 | -0.22755 | 249.5896 | 258.1323 |
| YCRO24C   | 346.6195 | 446.9559 | 401.1511 | 385.0353 | 334.1564 | 389.417  | -0.10793 | 338.4075 | 316.0804 |
| YCRO79W   | 412.2585 | 499.3644 | 400.163  | 372.4993 | 269.6297 | 240.6949 | -0.57133 | 442.9653 | 405.6365 |
| YNL184C   | 0        | 1.977681 | 0        | 0        | 2.304527 | 0.978435 | 0.731188 | 0        | 0        |
| YFR019W   | 644.8736 | 496.3979 | 640.2608 | 582.0302 | 505.8437 | 718.1711 | 0.019715 | 616.1041 | 665.5248 |
| YDL217C   | 900.5199 | 947.3091 | 915.9287 | 763.8027 | 689.0536 | 733.826  | -0.33789 | 675.6908 | 706.7909 |
| YGR204W   | 8850.89  | 10395.68 | 9091.111 | 9719.904 | 9280.33  | 9534.846 | 0.010015 | 8908.775 | 9051.313 |
| YMR157C   | 494.0192 | 472.6657 | 456.4823 | 397.5714 | 485.1029 | 354.1934 | -0.20241 | 456.4567 | 420.5625 |
| YIL159W   | 339.7102 | 348.0718 | 381.3899 | 367.1267 | 428.642  | 484.3252 | 0.259756 | 295.685  | 328.3724 |
| YBL100W-C | 10.36404 | 3.955362 | 1.976114 | 4.477155 | 9.218108 | 10.76278 | 0.585834 | 0        | 6.146008 |
| YLR461W   | 0        | 0        | 0        | 7.163448 | 2.304527 | 0.978435 | #DIV/0!  | 0        | 0        |
| YOR351C   | 11.5156  | 19.77681 | 25.68948 | 18.80405 | 16.13169 | 15.65496 | -0.17163 | 29.23121 | 22.82803 |
| YPR032W   | 492.8677 | 672.4115 | 647.1772 | 565.9124 | 583.0453 | 614.457  | -0.03957 | 622.8497 | 656.7448 |
| YDR341C   | 7615.266 | 6644.019 | 7411.414 | 7578.033 | 7946.009 | 8023.165 | 0.11981  | 8460.188 | 8161.02  |
| YDR420W   | 968.4619 | 897.8671 | 1024.615 | 940.2026 | 1138.436 | 1402.097 | 0.267852 | 638.5896 | 959.6552 |
| YDR082W   | 460.624  | 490.4649 | 405.1033 | 372.4993 | 402.14   | 451.0584 | -0.14596 | 335.0347 | 337.1524 |
| YPL153C   | 358.1351 | 357.9602 | 500.9448 | 422.6434 | 435.5556 | 496.0664 | 0.154134 | 485.6879 | 448.6585 |
| YCRO13C   | 57.578   | 41.5313  | 14.82085 | 31.34009 | 61.06996 | 35.22365 | 0.16386  | 101.185  | 50.92406 |
| YPR094W   | 153.1575 | 247.2101 | 191.683  | 208.6354 | 228.1482 | 166.3339 | 0.026719 | 159.6474 | 136.0902 |
| YMR191W   | 1050.223 | 1089.702 | 1065.125 | 963.4838 | 835.391  | 882.5481 | -0.25735 | 883.6821 | 771.7629 |
| YBL055C   | 1288.596 | 1423.93  | 1281.51  | 1290.316 | 1221.399 | 1067.472 | -0.15821 | 1186.113 | 1185.301 |
| YGL226C-f | 978.8259 | 937.4207 | 939.642  | 1003.778 | 1037.037 | 862.001  | 0.023514 | 974.7486 | 947.3632 |
| YOR314W-f | 2.30312  | 0.98884  | 0        | 1.790862 | 3.45679  | 2.935304 | 1.313675 | 0        | 0        |
| YNL158W   | 374.257  | 532.985  | 463.3987 | 479.0556 | 413.6626 | 495.088  | 0.017956 | 512.6705 | 575.0907 |
| YPR162C   | 583.8409 | 663.5119 | 578.0132 | 524.7226 | 571.5227 | 672.1846 | -0.04572 | 465.4509 | 498.7046 |
| YGR017W   | 598.8112 | 733.7196 | 781.5529 | 749.4758 | 675.2264 | 702.5161 | 0.008936 | 882.5578 | 789.323  |
| YPL118W   | 2388.335 | 2179.404 | 2164.833 | 2086.354 | 2057.943 | 1868.81  | -0.16305 | 2182.223 | 2243.293 |
| YDL132W   | 2202.934 | 1972.737 | 2008.72  | 2061.282 | 2099.424 | 2312.041 | 0.065747 | 2112.517 | 2423.283 |
| YMR166C   | 436.4412 | 687.2441 | 549.3596 | 612.4748 | 542.7161 | 486.2821 | -0.02749 | 435.0954 | 451.2926 |
| YPL122C   | 725.4828 | 686.2553 | 588.8819 | 610.684  | 672.9219 | 767.0928 | 0.035668 | 494.6821 | 608.4547 |
| YMR057C   | 49.51708 | 12.85493 | 26.67753 | 39.39897 | 28.80659 | 13.69809 | -0.12068 | 20.23699 | 14.92602 |
| YNL313C   | 2120.022 | 2331.686 | 2357.504 | 2372.892 | 2524.609 | 2821.806 | 0.180984 | 2669.035 | 2850.869 |
| YJL084C   | 572.3253 | 632.8579 | 769.6963 | 681.423  | 709.7943 | 816.0146 | 0.160474 | 580.1272 | 586.5047 |
| YOL076W   | 1138.893 | 1162.876 | 1270.641 | 1151.524 | 1259.424 | 1457.868 | 0.114994 | 1373.867 | 1416.216 |
| YPL157W   | 773.8483 | 859.3023 | 755.8635 | 764.6981 | 867.6544 | 753.3947 | -0.00197 | 765.633  | 696.2549 |
| YDR515W   | 416.8647 | 450.9112 | 558.2521 | 566.8078 | 449.3828 | 600.7589 | 0.181272 | 614.9798 | 578.6027 |
| YHR070W   | 929.3089 | 1139.144 | 1013.746 | 1220.472 | 1207.572 | 1199.561 | 0.235057 | 861.1965 | 989.5072 |
| YLR186W   | 3384.435 | 3298.772 | 3296.158 | 3654.254 | 3612.346 | 3311.023 | 0.083996 | 3509.994 | 2986.082 |
| YGR075C   | 368.4992 | 396.525  | 385.3422 | 368.0222 | 358.3539 | 298.4226 | -0.16675 | 346.2775 | 278.3263 |
| YLR370C   | 2130.386 | 1877.808 | 2114.442 | 1964.576 | 1809.054 | 1867.832 | -0.11808 | 2199.087 | 2194.125 |
| YKR048C   | 5254.568 | 5839.103 | 5311.793 | 6605.595 | 6029.795 | 5655.353 | 0.156937 | 6136.306 | 5811.489 |
| YOL136C   | 951.1885 | 1024.439 | 979.1643 | 802.3062 | 864.1976 | 916.7933 | -0.19384 | 907.2919 | 1018.481 |
| YBR251W   | 872.8824 | 864.2465 | 791.4335 | 883.7904 | 750.1235 | 780.7909 | -0.06647 | 1092.798 | 963.1672 |
| YJL142C   | 44.91084 | 33.62057 | 26.67753 | 44.77155 | 34.5679  | 32.28835 | 0.085439 | 20.23699 | 32.48604 |
| YOR072W-f | 2.30312  | 7.910723 | 7.904455 | 8.95431  | 2.304527 | 17.61182 | 0.672157 | 5.621387 | 0.878001 |
| YHR091C   | 589.5987 | 736.6861 | 693.6159 | 611.5794 | 700.5762 | 651.6375 | -0.04064 | 507.0491 | 626.8928 |
| YNL130C-f | 27.63744 | 11.86609 | 9.880568 | 18.80405 | 17.28395 | 6.849043 | -0.20182 | 11.24277 | 10.53601 |
| YLR169W   | 186.5527 | 183.9243 | 171.9219 | 200.5765 | 172.8395 | 167.3123 | -0.00445 | 173.1387 | 128.1882 |
| YMR158W   | 829.1232 | 764.3737 | 827.9916 | 649.1875 | 785.8437 | 653.5944 | -0.21334 | 726.2833 | 719.9609 |
| YDR300C   | 1563.818 | 1550.502 | 1517.655 | 1557.155 | 1517.531 | 1444.17  | -0.03567 | 1737.009 | 1702.444 |
| YML016C   | 768.0905 | 824.6929 | 962.3673 | 945.5752 | 987.4898 | 1224.022 | 0.305186 | 738.6503 | 811.273  |
| YAL044W-f | 11.5156  | 6.921883 | 6.916398 | 3.581724 | 3.45679  | 6.849043 | -0.86841 | 2.248555 | 2.634003 |
| YHR065C   | 2086.627 | 2188.304 | 2062.075 | 2501.834 | 2422.058 | 2659.386 | 0.25902  | 2097.902 | 2051.889 |

|           |          |          |          |          |          |          |          |          |          |
|-----------|----------|----------|----------|----------|----------|----------|----------|----------|----------|
| YLR035C   | 411.1069 | 380.7036 | 439.6853 | 331.3095 | 328.3951 | 346.3659 | -0.29168 | 323.7919 | 268.6683 |
| YPR086W   | 2259.361 | 2298.065 | 2450.381 | 2561.828 | 2316.05  | 2301.278 | 0.034851 | 2617.318 | 2596.249 |
| YNL307C   | 2663.558 | 2339.596 | 2486.939 | 2376.474 | 2654.815 | 2891.275 | 0.080984 | 2796.078 | 2697.219 |
| YDR240C   | 426.0772 | 445.967  | 371.5094 | 389.5125 | 396.3786 | 399.2014 | -0.06947 | 477.8179 | 416.1725 |
| YFR038W   | 869.4278 | 766.3513 | 944.5823 | 946.4706 | 917.2017 | 1056.709 | 0.178584 | 991.6127 | 990.3852 |
| YJL094C   | 447.9568 | 542.8734 | 456.4823 | 430.7023 | 418.2716 | 399.2014 | -0.21356 | 554.2688 | 521.5326 |
| YPR051W   | 24.18276 | 22.74333 | 31.61782 | 35.81724 | 36.87243 | 32.28835 | 0.418516 | 23.60983 | 22.82803 |
| YMR270C   | 741.6046 | 753.4964 | 638.2847 | 703.8088 | 631.4404 | 628.1551 | -0.11979 | 809.4798 | 806.005  |
| YDR007W   | 667.9048 | 725.8089 | 692.6278 | 667.9915 | 595.7202 | 513.6782 | -0.23122 | 609.3584 | 507.4846 |
| YML029W   | 914.3386 | 921.5993 | 839.8483 | 818.424  | 893.0042 | 1008.766 | 0.023747 | 882.5578 | 1026.383 |
| YOL022C   | 1687.035 | 1818.478 | 1539.393 | 1862.497 | 1722.634 | 1800.32  | 0.09424  | 2034.942 | 1925.456 |
| YCR036W   | 1082.466 | 1243.961 | 1126.385 | 1061.981 | 1037.037 | 919.7286 | -0.19382 | 1245.699 | 1084.331 |
| YMR262W   | 604.569  | 577.4828 | 571.0968 | 461.147  | 464.3622 | 454.9721 | -0.34478 | 456.4567 | 449.5365 |
| YHR127W   | 1059.435 | 904.789  | 989.0449 | 984.0787 | 1025.514 | 944.1895 | 0.000251 | 1036.584 | 1033.407 |
| YOR269W   | 316.679  | 277.8642 | 312.226  | 236.3938 | 336.4609 | 328.7541 | -0.00823 | 359.7688 | 404.7585 |
| YLR271W   | 246.4338 | 183.9243 | 174.8861 | 195.204  | 185.5144 | 126.2181 | -0.25571 | 214.737  | 267.7903 |
| YJL200C   | 1596.062 | 1788.812 | 1719.219 | 1890.255 | 2046.42  | 1998.942 | 0.217743 | 1671.801 | 1869.264 |
| YGR262C   | 734.6952 | 829.6371 | 724.2457 | 787.9793 | 840.0001 | 774.9203 | 0.070325 | 1023.093 | 896.4391 |
| YBR031W   | 53007.46 | 48934.75 | 48769.5  | 54438.62 | 50928.89 | 46158.64 | 0.007775 | 68140.21 | 55607.32 |
| YER185W   | 25.33432 | 11.86609 | 12.84474 | 18.80405 | 13.82716 | 17.61182 | 0.005694 | 4.49711  | 7.024009 |
| YAR003W   | 610.3268 | 734.7084 | 804.2783 | 710.0768 | 695.9671 | 678.0553 | -0.04445 | 572.2572 | 618.9908 |
| YPL168W   | 268.3135 | 280.8307 | 265.7873 | 205.9491 | 233.9095 | 308.2069 | -0.12351 | 275.448  | 295.0084 |
| YPL063W   | 3766.753 | 3630.033 | 3583.682 | 3556.652 | 3538.601 | 3319.829 | -0.07627 | 3610.055 | 3245.092 |
| YNL099C   | 958.0979 | 908.7444 | 1101.683 | 1113.021 | 1002.469 | 1070.408 | 0.101953 | 1154.633 | 1029.017 |
| YDL130W-f | 1727.34  | 1482.272 | 1573.975 | 1318.074 | 1352.757 | 1190.755 | -0.3089  | 1560.497 | 1470.652 |
| YDL014W   | 9057.019 | 13216.84 | 9072.338 | 11212.59 | 10683.79 | 8120.03  | -0.06254 | 8625.457 | 8985.463 |
| YGR174C   | 955.7947 | 935.4431 | 745.9829 | 831.8554 | 737.4486 | 709.3652 | -0.21083 | 961.2572 | 811.273  |
| YMR040W   | 93.27636 | 124.5939 | 96.82957 | 118.1969 | 94.4856  | 78.27478 | -0.11317 | 80.94798 | 80.7761  |
| YER163C   | 1194.168 | 1178.698 | 1115.516 | 1059.295 | 1159.177 | 1060.623 | -0.08926 | 1216.468 | 948.2412 |
| YGL018C   | 598.8112 | 572.5386 | 541.4551 | 651.8738 | 554.2387 | 468.6702 | -0.03239 | 761.1359 | 698.8889 |
| YMR172C-f | 0        | 5.933043 | 3.952227 | 1.790862 | 8.065844 | 6.849043 | 0.756992 | 0        | 0        |
| YMR277W   | 1675.52  | 1902.529 | 1834.822 | 2004.87  | 1960     | 2120.268 | 0.168896 | 1937.13  | 2191.491 |
| YOL120C   | 45164.18 | 35529.04 | 40584.43 | 42360.16 | 41626.67 | 39548.33 | 0.026608 | 46762.07 | 38240.46 |
| YNL225C   | 360.4383 | 340.1611 | 332.9752 | 317.878  | 354.8971 | 414.8563 | 0.073547 | 408.1127 | 400.3685 |
| YBL039W-f | 165.8246 | 155.2479 | 170.9338 | 125.3603 | 146.3375 | 102.7356 | -0.39397 | 148.4046 | 105.3601 |
| YNR025C   | 62.18424 | 62.29695 | 66.19981 | 53.72586 | 53.00412 | 62.61982 | -0.17115 | 44.9711  | 55.31407 |
| YHR144C   | 451.4115 | 412.3465 | 418.9361 | 443.2384 | 524.2799 | 402.1367 | 0.094635 | 623.974  | 456.5606 |
| YLR198C   | 39.15304 | 25.70985 | 14.82085 | 42.98069 | 33.41564 | 15.65496 | 0.208152 | 17.98844 | 19.31602 |
| YILO46W-f | 2.30312  | 3.955362 | 3.952227 | 1.790862 | 6.913581 | 12.71965 | 1.069151 | 0        | 5.268006 |
| YDR311W   | 846.3966 | 720.8647 | 903.0839 | 793.3519 | 762.7984 | 1017.572 | 0.059144 | 888.1792 | 927.1691 |
| YGR068C   | 517.0504 | 799.9719 | 571.0968 | 625.9063 | 670.6173 | 641.8532 | 0.037899 | 546.3989 | 500.4606 |
| YJR067C   | 528.566  | 368.8375 | 450.5539 | 440.5521 | 475.8848 | 374.7405 | -0.06209 | 412.6098 | 320.4704 |
| YGR101W   | 622.9939 | 629.8914 | 515.7657 | 499.6505 | 421.7284 | 482.3683 | -0.33337 | 655.4538 | 594.4067 |
| YGR193C   | 1516.604 | 1413.053 | 1489.99  | 1519.546 | 1514.074 | 1556.69  | 0.05466  | 1495.289 | 1643.618 |
| YFL021C-f | 12.66716 | 4.944202 | 22.72531 | 11.6406  | 6.913581 | 9.784347 | -0.50933 | 5.621387 | 6.146008 |
| YGL064C   | 453.7146 | 537.9292 | 466.3628 | 522.9317 | 486.2552 | 526.3979 | 0.074791 | 438.4682 | 405.6365 |
| YDR064W   | 33627.85 | 26786.7  | 30036.93 | 31336.5  | 31482.14 | 28187.73 | 0.008823 | 35490.07 | 27779.08 |
| YHR020W   | 7884.731 | 8079.815 | 7958.798 | 8600.615 | 8499.095 | 9301.979 | 0.142211 | 9754.231 | 9174.233 |
| YMR017W   | 43.75928 | 44.49782 | 33.59393 | 27.75836 | 29.95885 | 32.28835 | -0.43703 | 52.84104 | 34.24204 |
| YER019C-f | 3309.583 | 2730.188 | 2909.827 | 2981.785 | 3116.873 | 2744.509 | -0.01726 | 3336.856 | 2967.644 |
| YOR268C   | 0        | 0        | 1.976114 | 7.163448 | 4.609054 | 1.956869 | 2.796528 | 20.23699 | 7.024009 |
| YOR070C   | 614.933  | 641.7574 | 697.5681 | 528.3043 | 521.9754 | 635.0041 | -0.21363 | 604.8613 | 735.7649 |
| YDR057W   | 836.0325 | 742.6192 | 715.3531 | 663.5144 | 774.3211 | 763.1791 | -0.0597  | 602.6127 | 639.1848 |
| YGL007C-f | 9.21248  | 8.899564 | 9.880568 | 6.268017 | 3.45679  | 0.978435 | -1.387   | 10.1185  | 16.68202 |

|                   |          |          |          |          |          |          |          |          |          |
|-------------------|----------|----------|----------|----------|----------|----------|----------|----------|----------|
| YER140W           | 627.6002 | 580.4493 | 688.6756 | 658.1418 | 637.2017 | 665.3356 | 0.047843 | 582.3757 | 586.5047 |
| YCR050C           | 1.15156  | 0        | 0        | 0        | 1.152263 | 0        | 0.000881 | 3.372832 | 1.756002 |
| YDR174W           | 6742.383 | 6708.294 | 6685.192 | 7383.724 | 6607.079 | 6093.691 | -0.00369 | 6335.304 | 5889.631 |
| YAL029C           | 1766.493 | 1637.52  | 2113.454 | 1875.928 | 2131.687 | 2870.727 | 0.318055 | 2230.567 | 2482.987 |
| YBL037W           | 672.511  | 669.445  | 703.4965 | 586.5073 | 627.9836 | 674.1415 | -0.11508 | 688.0578 | 703.2789 |
| YDR331W           | 687.4813 | 915.6662 | 818.1111 | 902.5945 | 963.2923 | 915.8149 | 0.200211 | 989.3642 | 993.0192 |
| YCR015C           | 358.1351 | 321.3731 | 423.8764 | 357.277  | 315.7202 | 308.2069 | -0.16931 | 342.9046 | 273.9363 |
| YLR218C           | 172.734  | 129.5381 | 159.0771 | 170.1319 | 130.2058 | 142.8515 | -0.05794 | 159.6474 | 92.19011 |
| YDR150W           | 2631.314 | 1803.645 | 2798.177 | 2126.649 | 2390.947 | 3006.73  | 0.056941 | 2720.751 | 3143.244 |
| YCR081W           | 232.6151 | 214.5784 | 274.6798 | 222.0669 | 222.3868 | 352.2365 | 0.142273 | 240.5954 | 319.5924 |
| YOL078W           | 419.1678 | 409.3799 | 501.9329 | 510.3957 | 465.5144 | 651.6375 | 0.290752 | 491.3093 | 575.9687 |
| YKL090W           | 529.7176 | 463.7662 | 496.0045 | 444.1338 | 553.0865 | 507.8076 | 0.014973 | 411.4856 | 406.5145 |
| YIL121W           | 229.1604 | 293.6856 | 213.4203 | 282.9562 | 229.3004 | 261.2421 | 0.071171 | 214.737  | 208.0863 |
| YCL058C           | 0        | 1.977681 | 0        | 1.790862 | 3.45679  | 0.978435 | 1.654516 | 0        | 0        |
| YNL246W           | 1737.704 | 1975.703 | 1650.055 | 1797.13  | 1824.033 | 1559.625 | -0.04999 | 1536.887 | 1559.33  |
| YDR056C           | 1977.228 | 1698.828 | 1922.759 | 1860.706 | 2071.77  | 1828.694 | 0.04124  | 1921.39  | 1672.592 |
| YDL046W           | 5709.434 | 5631.446 | 5498.536 | 5656.438 | 5470.947 | 4810.963 | -0.07934 | 5610.145 | 5049.384 |
| YPR120C           | 457.1693 | 476.6211 | 451.542  | 434.284  | 474.7325 | 538.1391 | 0.062988 | 512.6705 | 529.4346 |
| YBR123C           | 682.875  | 684.2776 | 650.1414 | 662.619  | 653.3334 | 646.7453 | -0.03958 | 568.8844 | 554.0187 |
| YNL041C           | 572.3253 | 575.5051 | 688.6756 | 616.0565 | 646.4198 | 1009.745 | 0.30714  | 826.3439 | 753.3249 |
| YML049C           | 801.4857 | 634.8356 | 925.8092 | 773.6524 | 843.4569 | 966.6935 | 0.129407 | 833.0896 | 902.5851 |
| YHR172W           | 325.8915 | 329.2839 | 430.7928 | 347.4272 | 364.1153 | 586.0824 | 0.256892 | 393.4971 | 496.0706 |
| YBR125C           | 777.303  | 757.4518 | 754.8754 | 727.9854 | 781.2346 | 700.5593 | -0.05121 | 646.4596 | 624.2588 |
| YAR020C           | 67.94204 | 66.25231 | 43.4745  | 62.68017 | 76.04939 | 33.26678 | -0.04681 | 39.34971 | 31.60804 |
| YMR030W           | 214.1901 | 155.2479 | 203.5397 | 177.2953 | 180.9054 | 184.9242 | -0.0772  | 175.3873 | 251.9863 |
| YBL105C           | 1313.93  | 1259.783 | 1566.07  | 1447.017 | 1268.642 | 2129.074 | 0.226862 | 1568.367 | 1748.978 |
| YCL048W           | 32.24368 | 31.64289 | 21.73725 | 17.01319 | 13.82716 | 11.74122 | -1.00778 | 17.98844 | 17.56002 |
| YEL026W           | 7660.177 | 7254.133 | 6671.36  | 8661.504 | 8458.766 | 7772.685 | 0.205664 | 8724.393 | 7441.059 |
| YEL063C           | 1771.099 | 2386.072 | 1995.875 | 1842.797 | 1917.366 | 1787.6   | -0.14939 | 1699.908 | 1690.152 |
| YDR363W           | 375.4085 | 487.4983 | 500.9448 | 583.821  | 508.1482 | 649.6807 | 0.352768 | 571.133  | 626.0148 |
| YOR152C           | 228.0089 | 322.362  | 226.265  | 199.6811 | 172.8395 | 151.6574 | -0.56718 | 190.0029 | 153.6502 |
| YNL121C           | 4241.195 | 4591.186 | 4514.432 | 4649.973 | 4866.009 | 4970.448 | 0.118207 | 3984.439 | 4334.691 |
| YBR072C- <i>f</i> | 0        | 0        | 1.976114 | 3.581724 | 1.152263 | 5.870608 | 2.423952 | 1.124277 | 0.878001 |
| YPL219W           | 248.7369 | 219.5226 | 260.847  | 192.5177 | 225.8436 | 183.9457 | -0.27563 | 267.578  | 254.6203 |
| YOR186W           | 3.45468  | 6.921883 | 1.976114 | 3.581724 | 4.609054 | 6.849043 | 0.283964 | 4.49711  | 10.53601 |
| YHR089C           | 8073.587 | 7893.913 | 7989.427 | 8678.518 | 8292.84  | 7528.077 | 0.032306 | 7999.234 | 7520.079 |
| YLR287C- <i>f</i> | 23115.26 | 18665.35 | 20686.95 | 21258.43 | 22813.66 | 21690.92 | 0.074169 | 24428.3  | 20746.29 |
| YPR044C           | 0        | 3.955362 | 0        | 1.790862 | 4.609054 | 0.978435 | 0.899489 | 0        | 0.878001 |
| YDL216C           | 127.8232 | 192.8239 | 186.7427 | 112.8243 | 179.7531 | 171.2261 | -0.12958 | 232.7254 | 182.6242 |
| YBR102C           | 725.4828 | 683.2887 | 790.4455 | 743.2078 | 754.7326 | 1016.594 | 0.193301 | 778      | 894.6831 |
| YIR040C           | 0        | 0        | 0        | 1.790862 | 2.304527 | 0        | #DIV/0!  | 0        | 0        |
| YOR343C           | 24.18276 | 50.43086 | 59.28341 | 17.01319 | 29.95885 | 20.54713 | -0.98775 | 20.23699 | 16.68202 |
| YLR457C           | 163.5215 | 106.7948 | 158.0891 | 122.6741 | 109.465  | 129.1534 | -0.24581 | 146.1561 | 164.1862 |
| YLR466C- <i>f</i> | 2.30312  | 0.98884  | 0.988057 | 0        | 1.152263 | 0        | -1.89315 | 0        | 0        |
| YBR019C           | 120.9138 | 170.0806 | 142.2802 | 121.7786 | 84.11523 | 95.8866  | -0.52178 | 71.95376 | 79.8981  |
| YHR095W           | 5.7578   | 11.86609 | 9.880568 | 6.268017 | 9.218108 | 9.784347 | -0.12221 | 6.745665 | 9.658012 |
| YML093W           | 3073.513 | 2877.526 | 3340.62  | 3954.223 | 3790.947 | 4539.937 | 0.402902 | 2962.471 | 3492.688 |
| YGR227W           | 732.3921 | 816.7822 | 731.1621 | 756.6392 | 819.2593 | 688.818  | -0.00992 | 653.2052 | 653.2328 |
| YER074W- <i>f</i> | 798.031  | 620.003  | 609.6311 | 670.6778 | 770.8643 | 688.818  | 0.071278 | 744.2717 | 630.4048 |
| YKL153W           | 27.63744 | 26.69869 | 34.58199 | 26.86293 | 38.02469 | 30.33148 | 0.098774 | 55.0896  | 37.75405 |
| YCR006C           | 74.8514  | 86.02912 | 64.22369 | 62.68017 | 88.72429 | 86.10225 | 0.077375 | 58.46243 | 51.80206 |
| YOR253W           | 1226.411 | 1338.89  | 1247.916 | 1370.905 | 1273.251 | 1012.68  | -0.06041 | 1205.225 | 1038.675 |
| YBR226C           | 8.06092  | 3.955362 | 2.96417  | 4.477155 | 1.152263 | 5.870608 | -0.38144 | 12.36705 | 10.53601 |
| YPR049C           | 451.4115 | 374.7705 | 399.175  | 438.7612 | 470.1235 | 498.0233 | 0.199326 | 284.4422 | 335.3964 |

|                   |          |          |          |          |          |          |          |          |          |
|-------------------|----------|----------|----------|----------|----------|----------|----------|----------|----------|
| YPR148C           | 3945.244 | 3688.375 | 3833.66  | 4016.008 | 3686.091 | 3665.216 | -0.01263 | 3577.451 | 3102.856 |
| YGL262W           | 0        | 13.84377 | 8.892511 | 12.53603 | 2.304527 | 15.65496 | 0.423601 | 11.24277 | 12.29202 |
| YER093C- <i>f</i> | 373.1054 | 413.3353 | 371.5094 | 327.7278 | 305.3498 | 305.2716 | -0.30338 | 327.1647 | 329.2504 |
| YDL165W           | 1081.315 | 1024.439 | 1074.018 | 1254.499 | 1121.152 | 1090.955 | 0.124601 | 1163.627 | 928.0471 |
| YER039C           | 76.00296 | 88.0068  | 63.23564 | 35.81724 | 39.17696 | 41.09426 | -0.96903 | 40.47399 | 35.12004 |
| YHR158C           | 609.1752 | 585.3935 | 643.225  | 646.5012 | 595.7202 | 812.1008 | 0.160688 | 546.3989 | 780.543  |
| YOL087C           | 724.3312 | 748.5522 | 901.1078 | 711.8677 | 755.8848 | 895.2678 | -0.00668 | 818.474  | 928.0471 |
| YLR361C- <i>f</i> | 261.4041 | 238.3105 | 299.3812 | 236.3938 | 285.7613 | 227.9753 | -0.09123 | 198.9971 | 251.9863 |
| YDR147W           | 738.1499 | 769.3179 | 845.7766 | 617.8474 | 685.5968 | 678.0553 | -0.24806 | 596.9913 | 602.3087 |
| YJL002C           | 4360.957 | 4511.09  | 4554.942 | 4761.007 | 5116.05  | 4967.513 | 0.144799 | 4844.512 | 5083.626 |
| YML107C           | 550.4457 | 575.5051 | 424.8644 | 522.9317 | 465.5144 | 430.5113 | -0.1282  | 440.7168 | 363.4924 |
| YJL087C           | 655.2376 | 675.378  | 731.1621 | 780.8159 | 799.6708 | 997.025  | 0.32209  | 610.4827 | 698.8889 |
| YBL031W           | 552.7488 | 445.967  | 472.2912 | 512.1865 | 512.7572 | 549.8803 | 0.098387 | 463.2023 | 557.5307 |
| YNL261W           | 528.566  | 506.2863 | 449.5659 | 588.2982 | 560      | 521.5057 | 0.169781 | 616.1041 | 560.1647 |
| YDL137W           | 7785.697 | 6162.454 | 7008.287 | 6825.871 | 6918.19  | 6312.861 | -0.06329 | 6841.228 | 5854.511 |
| YOL089C           | 366.1961 | 295.6633 | 431.7808 | 359.9633 | 425.1852 | 533.2469 | 0.269645 | 431.7226 | 419.6845 |
| YOL125W           | 914.3386 | 1084.758 | 977.1882 | 993.033  | 1129.218 | 907.009  | 0.025453 | 1199.604 | 1056.235 |
| YMR204C           | 163.5215 | 155.2479 | 162.0413 | 138.7918 | 111.7696 | 106.6494 | -0.42869 | 175.3873 | 157.1622 |
| YBR237W           | 476.7458 | 531.9962 | 586.9058 | 509.5003 | 512.7572 | 561.6215 | -0.01068 | 622.8497 | 604.0647 |
| YJL125C           | 1486.664 | 1832.321 | 1675.744 | 1745.195 | 1768.724 | 1711.282 | 0.06508  | 1690.913 | 1428.508 |
| YPR164W           | 506.6864 | 427.1791 | 548.3715 | 485.3236 | 573.8272 | 707.4083 | 0.253166 | 510.422  | 623.3808 |
| YNL233W           | 710.5125 | 540.8957 | 683.7353 | 732.4626 | 722.4692 | 970.6072 | 0.325865 | 769.0058 | 806.883  |
| YOL111C           | 2449.368 | 2413.759 | 2177.677 | 2515.266 | 2152.428 | 1793.471 | -0.12395 | 2106.896 | 1884.19  |
| YOR138C           | 637.9642 | 822.7152 | 749.9351 | 704.7042 | 616.461  | 663.3787 | -0.15564 | 731.9046 | 705.9129 |
| YLR322W           | 0        | 0.98884  | 0.988057 | 1.790862 | 4.609054 | 1.956869 | 2.07971  | 0        | 0        |
| YDR132C           | 295.9509 | 344.1165 | 264.7992 | 272.211  | 324.9383 | 334.6247 | 0.042275 | 238.3468 | 245.8403 |
| YOL061W           | 3953.305 | 4527.9   | 4321.761 | 4514.763 | 4235.721 | 4248.364 | 0.021906 | 3865.266 | 3937.835 |
| YFR041C           | 510.1411 | 486.5095 | 612.5952 | 542.6312 | 556.5433 | 602.7158 | 0.080753 | 632.9682 | 629.5268 |
| YCR060W           | 644.8736 | 561.6614 | 624.4519 | 667.9915 | 778.9301 | 608.5864 | 0.166874 | 934.2746 | 784.933  |
| YFR009W           | 1989.896 | 2045.911 | 2191.51  | 2181.27  | 2210.041 | 2666.235 | 0.180556 | 2264.295 | 2349.531 |
| YJR016C           | 5907.502 | 6472.949 | 6345.301 | 6860.793 | 7012.675 | 7152.358 | 0.167139 | 6577.023 | 6347.07  |
| YIR007W           | 336.2555 | 333.2392 | 428.8167 | 342.9501 | 435.5556 | 384.5248 | 0.082602 | 309.1763 | 337.1524 |
| YIL011W           | 7105.125 | 5567.172 | 6540.936 | 6713.942 | 6785.68  | 5768.851 | 0.004142 | 7052.593 | 5969.529 |
| YLR419W           | 746.2108 | 843.4809 | 875.4183 | 978.7061 | 982.8807 | 1290.555 | 0.399738 | 935.3989 | 1173.009 |
| YCL017C           | 1973.774 | 2499.789 | 2166.809 | 2207.237 | 2030.288 | 1937.301 | -0.10487 | 2484.653 | 2250.317 |
| YBR245C           | 1480.906 | 1360.644 | 1505.799 | 1636.848 | 1523.292 | 1885.444 | 0.214885 | 1579.61  | 1720.004 |
| YAL034C           | 306.3149 | 364.8821 | 355.7005 | 360.8587 | 314.5679 | 292.552  | -0.08525 | 410.3613 | 383.6865 |
| YLR273C           | 64.48736 | 118.6609 | 85.96094 | 92.2294  | 64.52675 | 75.33947 | -0.21347 | 87.69364 | 105.3601 |
| YDR479C           | 533.1723 | 593.3043 | 566.1566 | 575.7621 | 557.6955 | 596.8452 | 0.031755 | 664.448  | 616.3568 |
| YCL029C           | 877.4887 | 719.8758 | 875.4183 | 878.4178 | 893.0042 | 973.5425 | 0.150652 | 921.9075 | 986.8732 |
| YNL255C           | 10064.63 | 9125.02  | 9714.575 | 10643.99 | 10159.51 | 9741.296 | 0.079646 | 10311.87 | 9481.534 |
| YDR194C           | 2996.359 | 3036.729 | 3233.91  | 3509.194 | 3257.449 | 3663.26  | 0.170552 | 2809.569 | 3355.72  |
| YOR318C           | 20.72808 | 11.86609 | 19.76114 | 19.69948 | 28.80659 | 30.33148 | 0.590547 | 20.23699 | 19.31602 |
| YBR221C           | 5588.52  | 5796.583 | 5449.133 | 5332.292 | 5286.585 | 4475.36  | -0.1574  | 6055.358 | 6045.037 |
| YEL059C- <i>f</i> | 350.0742 | 270.9423 | 261.8351 | 308.0283 | 285.7613 | 272.0049 | -0.02815 | 310.3006 | 230.9143 |
| YPL155C           | 756.5749 | 750.5299 | 755.8635 | 796.0382 | 850.3704 | 1067.472 | 0.262141 | 553.1445 | 722.5949 |
| YMR198W           | 352.3773 | 322.362  | 395.2227 | 325.9369 | 367.572  | 458.8859 | 0.107075 | 468.8237 | 395.1005 |
| YJL190C           | 27803.26 | 21301.6  | 24703.4  | 26166.29 | 25839.51 | 24848.33 | 0.05834  | 35666.58 | 29073.25 |
| YML009C- <i>f</i> | 11.5156  | 9.888404 | 13.8328  | 14.3269  | 13.82716 | 14.67652 | 0.281558 | 6.745665 | 7.90201  |
| YNL214W           | 299.4056 | 252.1543 | 252.9425 | 298.1785 | 318.0247 | 260.2636 | 0.123603 | 392.3728 | 339.7864 |
| YPL032C           | 2716.53  | 2329.708 | 2974.051 | 3008.648 | 3103.046 | 4053.655 | 0.341934 | 2313.763 | 2791.165 |
| YGL015C           | 20.72808 | 17.79913 | 7.904455 | 10.74517 | 4.609054 | 14.67652 | -0.62867 | 24.7341  | 27.21803 |
| YDR199W           | 3.45468  | 1.977681 | 0.988057 | 5.372586 | 3.45679  | 3.913739 | 0.988979 | 0        | 3.512004 |
| YJR011C           | 199.2199 | 206.6677 | 188.7189 | 173.7136 | 163.6214 | 142.8515 | -0.30834 | 129.2919 | 151.8942 |



|                   |          |          |          |          |          |          |          |          |          |
|-------------------|----------|----------|----------|----------|----------|----------|----------|----------|----------|
| YER056C           | 7781.091 | 11066.11 | 9084.194 | 9641.106 | 9213.499 | 8524.123 | -0.02883 | 9311.266 | 9450.804 |
| YLR245C           | 154.309  | 194.8016 | 168.9577 | 140.5827 | 130.2058 | 183.9457 | -0.18812 | 138.2861 | 146.6262 |
| YGR131W           | 38.00148 | 51.4197  | 61.25952 | 38.50353 | 48.39507 | 31.30991 | -0.35016 | 26.98266 | 22.82803 |
| YKL021C           | 1883.952 | 2137.873 | 1945.484 | 2409.605 | 2575.309 | 2133.966 | 0.25457  | 2043.936 | 2150.225 |
| YLR313C           | 244.1307 | 234.3552 | 201.5636 | 264.1522 | 293.8272 | 359.0855 | 0.431384 | 318.1705 | 222.1343 |
| YCR066W           | 287.89   | 195.7904 | 250.9664 | 243.5572 | 246.5844 | 256.3499 | 0.023075 | 272.0751 | 286.2284 |
| YJR013W           | 628.7517 | 650.657  | 634.3325 | 604.4159 | 534.6502 | 589.0177 | -0.14722 | 558.7659 | 486.4126 |
| YOL107W           | 231.4635 | 287.7526 | 252.9425 | 276.6882 | 276.5432 | 227.9753 | 0.016807 | 222.6069 | 196.6722 |
| YNL129W           | 513.5957 | 443.9894 | 539.479  | 448.6109 | 483.9507 | 475.5193 | -0.08841 | 492.4335 | 457.4386 |
| YGL006W- <i>f</i> | 5.7578   | 8.899564 | 9.880568 | 6.268017 | 14.97943 | 12.71965 | 0.469124 | 2.248555 | 7.90201  |
| YDL199C           | 104.792  | 100.8617 | 106.7101 | 83.27509 | 86.41976 | 74.36104 | -0.35602 | 124.7948 | 115.8961 |
| YER147C- <i>f</i> | 110.5498 | 116.6832 | 162.0413 | 152.2233 | 163.6214 | 173.1829 | 0.329129 | 158.5231 | 172.9662 |
| YJL059W           | 330.4977 | 304.5629 | 262.8231 | 368.0222 | 277.6955 | 203.5144 | -0.08037 | 247.341  | 246.7183 |
| YLR363C           | 559.6581 | 617.0364 | 531.5746 | 551.5855 | 536.9548 | 522.4841 | -0.08456 | 463.2023 | 497.8266 |
| YGL246C           | 996.0993 | 1111.457 | 980.1524 | 964.3792 | 1136.132 | 1166.294 | 0.081344 | 1129.899 | 848.149  |
| YOR364W           | 2.30312  | 1.977681 | 0.988057 | 0        | 0        | 0.978435 | -2.42894 | 4.49711  | 5.268006 |
| YPR053C           | 34.5468  | 54.38622 | 37.54616 | 38.50353 | 24.19753 | 29.35304 | -0.45835 | 19.11272 | 23.70603 |
| YGL075C           | 208.4323 | 188.8685 | 203.5397 | 200.5765 | 188.9712 | 198.6222 | -0.03075 | 201.2457 | 202.8182 |
| YNL138W           | 4183.617 | 4145.219 | 4231.847 | 3952.433 | 4211.523 | 3928.415 | -0.05482 | 4664.627 | 4515.56  |
| YBR089W           | 0        | 0.98884  | 0        | 2.686293 | 0        | 0        | 1.441807 | 0        | 0        |
| YGL007W           | 34.5468  | 47.46434 | 40.51033 | 29.54922 | 35.72017 | 32.28835 | -0.32871 | 31.47977 | 39.51005 |
| YNL249C           | 246.4338 | 266.9869 | 268.7515 | 226.544  | 232.7572 | 244.6087 | -0.1521  | 203.4942 | 186.1362 |
| YER148W           | 1768.796 | 1526.77  | 1417.862 | 1649.384 | 1599.342 | 1472.544 | 0.002398 | 1567.243 | 1300.32  |
| YKL225W           | 0        | 0        | 0        | 0        | 0        | 0        | #DIV/0!  | 0        | 0        |
| YLL006W- <i>f</i> | 0        | 0        | 0        | 0        | 0        | 0        | #DIV/0!  | 0        | 0        |
| YCL031C           | 2505.794 | 2463.202 | 2310.077 | 2349.611 | 2364.445 | 2282.688 | -0.05707 | 2321.633 | 2157.249 |
| YIL055C           | 460.624  | 445.967  | 396.2108 | 292.8059 | 303.0453 | 304.2932 | -0.53339 | 319.2948 | 367.0044 |
| YIR023C- <i>f</i> | 0        | 0        | 0        | 0        | 0        | 0        | #DIV/0!  | 3.372832 | 0        |
| YDR352W           | 1005.312 | 1216.274 | 1033.507 | 1107.648 | 1085.432 | 993.1112 | -0.03087 | 965.7544 | 961.4112 |
| YMR183C           | 4509.509 | 4309.367 | 4402.781 | 4566.698 | 4445.432 | 4548.743 | 0.036547 | 4117.104 | 3900.081 |
| YJL198W           | 2829.383 | 3002.12  | 3161.782 | 3164.453 | 3539.753 | 4338.38  | 0.296158 | 2865.783 | 2943.938 |
| YBR111W- <i>f</i> | 558.5066 | 556.7172 | 506.8732 | 532.7815 | 492.0165 | 444.2094 | -0.14302 | 703.7977 | 612.8447 |
| YGL098W           | 567.719  | 617.0364 | 643.225  | 641.1286 | 623.3745 | 581.1902 | 0.013912 | 574.5058 | 565.4327 |
| YGL186C           | 1036.404 | 1084.758 | 1114.528 | 1130.929 | 1072.757 | 1020.507 | -0.00513 | 992.737  | 863.0751 |
| YGL114W           | 781.9092 | 942.3649 | 939.642  | 937.5163 | 850.3704 | 985.2838 | 0.057988 | 898.2977 | 1053.601 |
| YOL086W- <i>f</i> | 472.1396 | 354.9937 | 424.8644 | 457.5653 | 495.4733 | 404.0935 | 0.116329 | 519.4162 | 438.1225 |
| YBL108C- <i>f</i> | 3.45468  | 5.933043 | 7.904455 | 15.22233 | 3.45679  | 3.913739 | 0.385747 | 2.248555 | 2.634003 |
| YDL036C           | 1039.859 | 1041.249 | 1071.054 | 1093.321 | 1033.58  | 1076.278 | 0.023163 | 942.1445 | 919.2671 |
| YML031C- <i>f</i> | 0        | 0        | 0        | 0        | 0        | 0        | #DIV/0!  | 0        | 0        |
| YPL244C           | 1032.949 | 1137.166 | 1053.269 | 1169.433 | 1173.004 | 1064.537 | 0.079915 | 962.3815 | 974.5812 |
| YJR097W           | 423.7741 | 426.1902 | 377.4377 | 498.7551 | 470.1235 | 330.7109 | 0.082448 | 426.1012 | 329.2504 |
| YNL127W           | 572.3253 | 404.4357 | 532.5626 | 453.9835 | 538.107  | 686.8612 | 0.153659 | 589.1214 | 679.5728 |
| YER009W           | 6530.496 | 5894.478 | 5843.368 | 5919.695 | 6383.54  | 6154.354 | 0.014868 | 8632.202 | 6602.568 |
| YKL011C           | 328.1946 | 336.2057 | 331.9871 | 316.0872 | 255.8025 | 329.7325 | -0.14418 | 279.9451 | 246.7183 |
| YDR483W           | 6430.311 | 6586.666 | 6764.237 | 7449.986 | 7451.688 | 7385.225 | 0.172065 | 6943.538 | 6059.963 |
| YIL002C           | 865.9731 | 778.2174 | 820.0872 | 763.8027 | 810.0412 | 936.362  | 0.026641 | 661.0752 | 698.0109 |
| YMR117C           | 200.3714 | 189.8574 | 232.1934 | 194.3085 | 247.7366 | 274.9402 | 0.20405  | 147.2803 | 157.1622 |
| YDR290W           | 4.60624  | 0        | 0.988057 | 0        | 0        | 0        | #NUM!    | 0        | 0        |
| YGR264C           | 4500.296 | 4637.662 | 4798.992 | 5217.677 | 5356.873 | 6264.917 | 0.272932 | 5520.202 | 5676.277 |
| YER061C           | 726.6343 | 890.9452 | 677.807  | 583.821  | 626.8313 | 627.1767 | -0.32073 | 746.5202 | 683.9628 |
| YCL012C           | 515.8989 | 375.7594 | 359.6527 | 474.5784 | 472.428  | 384.5248 | 0.089646 | 503.6763 | 339.7864 |
| YPL145C           | 3635.475 | 3884.165 | 3839.589 | 3964.073 | 4004.116 | 4396.107 | 0.122315 | 4274.503 | 4336.447 |
| YFL046W           | 724.3312 | 696.1437 | 723.2576 | 780.8159 | 630.2881 | 650.6591 | -0.05625 | 793.7399 | 734.0089 |
| YLR007W           | 1090.527 | 1067.948 | 1024.615 | 1171.224 | 1024.362 | 917.7718 | -0.03196 | 997.2341 | 893.8051 |

|                   |          |          |          |          |          |          |          |          |          |
|-------------------|----------|----------|----------|----------|----------|----------|----------|----------|----------|
| YDR500C           | 13170.39 | 10791.22 | 11387.35 | 12253.08 | 12523.95 | 12413.4  | 0.073264 | 14956.26 | 11875.84 |
| YDR051C           | 1207.986 | 1298.347 | 1185.668 | 1280.466 | 1140.741 | 1124.221 | -0.05844 | 1177.119 | 1069.405 |
| YOR203W           | 3.45468  | 5.933043 | 3.952227 | 8.058879 | 5.761317 | 3.913739 | 0.410759 | 0        | 4.390005 |
| YDL057W           | 232.6151 | 174.0359 | 260.847  | 175.5045 | 170.535  | 162.4202 | -0.39263 | 195.6243 | 242.3283 |
| YOR122C           | 10671.51 | 8520.838 | 9855.867 | 9865.859 | 10012.02 | 9288.281 | 0.005846 | 10048.79 | 9288.373 |
| YNR065C           | 383.4695 | 434.101  | 439.6853 | 436.0749 | 485.1029 | 595.8667 | 0.270985 | 381.1301 | 410.9045 |
| YNL004W           | 2183.358 | 2385.083 | 2239.925 | 2447.213 | 2392.099 | 2352.157 | 0.078978 | 2401.457 | 2474.207 |
| YIL142W           | 5005.831 | 5099.45  | 5133.943 | 6109.526 | 5851.194 | 5754.175 | 0.217173 | 6152.046 | 6088.937 |
| YPL226W           | 6235.697 | 6258.371 | 7032     | 7556.542 | 7956.379 | 9629.754 | 0.364737 | 7586.624 | 8313.792 |
| YLR239C           | 751.9686 | 545.8399 | 595.7983 | 569.4941 | 492.0165 | 475.5193 | -0.30099 | 574.5058 | 507.4846 |
| YIL072W           | 78.30608 | 49.44202 | 68.17592 | 44.77155 | 61.06996 | 40.11582 | -0.42475 | 85.44509 | 51.80206 |
| YCR088W           | 5406.574 | 5078.684 | 5620.067 | 5489.888 | 5045.762 | 5250.281 | -0.0289  | 4614.035 | 4890.466 |
| YDL133C- <i>f</i> | 5338.632 | 3549.937 | 4320.772 | 4831.746 | 4725.432 | 5056.551 | 0.145766 | 5955.298 | 5021.288 |
| YMR211W           | 565.4159 | 600.2261 | 527.6223 | 551.5855 | 500.0823 | 620.3276 | -0.01824 | 631.8439 | 577.7247 |
| YDR522C           | 36.84992 | 55.37506 | 29.6417  | 26.86293 | 27.65432 | 29.35304 | -0.53907 | 25.85838 | 11.41401 |
| YER156C           | 4734.063 | 4958.046 | 4406.733 | 5298.265 | 4955.885 | 4351.099 | 0.05091  | 4676.994 | 4140.653 |
| YJL132W           | 57.578   | 80.09608 | 65.21175 | 71.63448 | 71.44034 | 72.40417 | 0.086879 | 76.45087 | 83.4101  |
| YGR121C           | 784.2123 | 1267.693 | 869.49   | 753.9529 | 679.8354 | 514.6567 | -0.58433 | 688.0578 | 652.3548 |
| YCL039W           | 967.3103 | 849.4139 | 983.1165 | 832.7509 | 857.284  | 861.0225 | -0.13425 | 794.8642 | 943.8512 |
| YGR284C           | 2246.693 | 2157.65  | 2277.471 | 2391.696 | 2363.292 | 1988.179 | 0.013187 | 2655.543 | 2498.791 |
| YDR201W           | 529.7176 | 415.313  | 476.2434 | 530.9906 | 485.1029 | 489.2174 | 0.082877 | 468.8237 | 395.1005 |
| YER162C           | 297.1025 | 256.1097 | 222.3128 | 248.9298 | 202.7984 | 260.2636 | -0.12331 | 251.8382 | 318.7144 |
| YLR122C           | 14.97028 | 4.944202 | 13.8328  | 18.80405 | 8.065844 | 9.784347 | 0.119209 | 13.49133 | 15.80402 |
| YJL027C           | 27.63744 | 21.75449 | 22.72531 | 10.74517 | 16.13169 | 13.69809 | -0.82975 | 5.621387 | 18.43802 |
| YKL183W           | 1180.349 | 1211.33  | 1030.543 | 1159.583 | 1069.3   | 971.5857 | -0.09665 | 1327.772 | 1228.324 |
| YDR367W           | 1163.076 | 1086.736 | 1123.421 | 1145.256 | 1167.243 | 1079.213 | 0.007883 | 1206.35  | 1042.187 |
| YDR337W           | 1081.315 | 1191.553 | 1049.316 | 1105.857 | 1030.124 | 812.1008 | -0.17236 | 1007.353 | 972.8252 |
| YAL018C           | 8.06092  | 1.977681 | 0        | 3.581724 | 0        | 0        | -1.48683 | 4.49711  | 3.512004 |
| YBL053W           | 9.21248  | 0.98884  | 1.976114 | 1.790862 | 5.761317 | 10.76278 | 0.588813 | 3.372832 | 0.878001 |
| YDL221W           | 31.09212 | 29.66521 | 20.74919 | 17.90862 | 17.28395 | 12.71965 | -0.76652 | 43.84682 | 21.95003 |
| YER166W           | 2083.172 | 1818.478 | 2001.803 | 1892.941 | 1957.696 | 2282.688 | 0.05511  | 1625.705 | 1714.736 |
| YMR037C           | 1616.79  | 1523.803 | 1903.986 | 1605.508 | 1735.309 | 2046.885 | 0.094936 | 1262.564 | 1634.838 |
| YLR033W           | 1122.771 | 1028.394 | 1125.397 | 1176.596 | 1231.77  | 1332.628 | 0.191239 | 1002.856 | 982.4832 |
| YGL083W           | 996.0993 | 872.1573 | 863.5617 | 806.7834 | 911.4404 | 1006.809 | -0.00359 | 763.3844 | 803.371  |
| YFR031C- <i>f</i> | 42812.7  | 35644.73 | 41488.51 | 43951.34 | 41648.56 | 38899.63 | 0.053756 | 43528.65 | 39159.73 |
| YKL076C           | 49.51708 | 27.68753 | 29.6417  | 55.51672 | 44.93828 | 47.9433  | 0.473937 | 42.72254 | 31.60804 |
| YKL181W           | 6485.586 | 7145.361 | 6657.527 | 6923.473 | 6617.449 | 6438.1   | -0.02217 | 7986.867 | 7242.631 |
| YLR426W           | 434.1381 | 568.5832 | 554.2999 | 448.6109 | 425.1852 | 416.8132 | -0.27074 | 614.9798 | 556.6527 |
| YGR006W           | 99.03415 | 150.3037 | 121.531  | 94.91569 | 111.7696 | 176.1182 | 0.045695 | 146.1561 | 181.7462 |
| YMR253C           | 361.5898 | 403.4469 | 436.7211 | 322.3552 | 275.391  | 319.9482 | -0.38906 | 320.4191 | 298.5204 |
| YER114C           | 1190.713 | 1258.794 | 1290.402 | 1429.108 | 1506.008 | 1700.52  | 0.309764 | 1131.023 | 1330.172 |
| YGL181W           | 1176.894 | 1175.731 | 1101.683 | 1153.315 | 1025.514 | 789.5968 | -0.2187  | 1070.312 | 1315.246 |
| YDL130W           | 31054.12 | 22654.33 | 26042.21 | 29824.12 | 27824.86 | 25083.15 | 0.052951 | 32228.54 | 25441.84 |
| YMR109W           | 1682.429 | 1685.973 | 1777.514 | 1763.999 | 1671.934 | 2058.627 | 0.094576 | 1369.37  | 1589.182 |
| YFL050C           | 545.8394 | 556.7172 | 530.5865 | 651.8738 | 632.5926 | 758.2869 | 0.322864 | 374.3844 | 496.9486 |
| YML094C- <i>f</i> | 0        | 0        | 0        | 0        | 0        | 0        | #DIV/0!  | 2.248555 | 0        |
| YLR089C           | 2962.964 | 3161.323 | 2954.29  | 2658.535 | 2696.297 | 2897.145 | -0.13773 | 2968.093 | 3224.02  |
| YDL105W           | 203.8261 | 273.9088 | 257.8828 | 179.0862 | 218.9301 | 240.6949 | -0.20379 | 245.0925 | 239.6943 |
| YPR076W           | 0        | 0        | 0        | 0        | 0        | 0        | #DIV/0!  | 1.124277 | 0.878001 |
| YGR170W           | 800.3342 | 795.0277 | 871.4661 | 795.1428 | 739.7531 | 868.85   | -0.03737 | 765.633  | 984.2392 |
| YLR379W           | 199.2199 | 253.1432 | 283.5723 | 264.1522 | 280      | 295.4873 | 0.190191 | 239.4711 | 366.1264 |
| YDR392W           | 813.0013 | 825.6818 | 811.1947 | 879.3133 | 815.8025 | 777.8556 | 0.013536 | 721.7861 | 701.5229 |
| YDL083C           | 29657.27 | 24417.44 | 26965.06 | 29973.66 | 28406.75 | 27417.7  | 0.082316 | 31853.03 | 26032.73 |
| YNL254C           | 276.3744 | 260.065  | 275.6679 | 269.5247 | 330.6996 | 415.8348 | 0.323242 | 321.5434 | 367.0044 |

|         |          |          |          |          |          |          |          |          |          |
|---------|----------|----------|----------|----------|----------|----------|----------|----------|----------|
| YKL162C | 128.9747 | 104.8171 | 102.7579 | 90.43853 | 94.4856  | 91.97286 | -0.28147 | 68.58093 | 92.19011 |
| YJR038C | 1.15156  | 0.98884  | 3.952227 | 0        | 1.152263 | 1.956869 | -0.97055 | 0        | 8.780011 |
| YML120C | 1336.961 | 1561.379 | 1672.78  | 1259.871 | 1230.617 | 1338.499 | -0.25558 | 1195.107 | 1393.388 |
| YGL085W | 403.046  | 494.4202 | 421.9003 | 419.0617 | 420.5762 | 307.2285 | -0.20215 | 391.2486 | 295.0084 |
| YLR163C | 984.5837 | 1181.664 | 985.0927 | 977.8107 | 970.2058 | 931.4698 | -0.13015 | 1180.491 | 1191.447 |
| YGL093W | 582.6893 | 585.3935 | 671.8786 | 693.0636 | 733.9918 | 885.4834 | 0.329802 | 676.815  | 705.0349 |
| YML065W | 717.4218 | 631.869  | 827.0036 | 816.6331 | 786.9959 | 836.5617 | 0.16512  | 631.8439 | 658.5008 |
| YER024W | 344.3164 | 426.1902 | 388.3063 | 393.0942 | 376.7902 | 362.9993 | -0.03265 | 267.578  | 310.8124 |
| YPL048W | 7099.367 | 7625.937 | 6816.604 | 7250.305 | 6839.836 | 5930.293 | -0.10567 | 7024.486 | 6207.468 |
| YER151C | 2031.352 | 1979.659 | 2381.217 | 2434.677 | 2532.675 | 2926.498 | 0.30441  | 2240.685 | 2933.402 |
| YJL076W | 1848.254 | 1586.1   | 2081.836 | 1990.543 | 1972.675 | 2799.302 | 0.293889 | 1701.032 | 2581.323 |
| YDR226W | 12588.85 | 10713.1  | 12074.05 | 12668.56 | 12239.34 | 11654.14 | 0.047575 | 14837.09 | 12766.14 |
| YPR089W | 1315.081 | 1004.662 | 1273.605 | 1164.06  | 1288.231 | 1585.064 | 0.168082 | 1405.347 | 1446.946 |
| YDR382W | 43773.1  | 32705.9  | 38706.14 | 39413.29 | 39564.12 | 36655.1  | 0.005593 | 46031.29 | 36528.36 |
| YBR126C | 7774.181 | 7270.944 | 6988.526 | 5142.46  | 5050.371 | 4727.797 | -0.5624  | 7596.743 | 7073.177 |
| YPL143W | 131.2778 | 207.6565 | 172.9099 | 174.6091 | 164.7737 | 121.3259 | -0.15185 | 134.9133 | 117.6521 |
| YLR032W | 436.4412 | 413.3353 | 508.8493 | 412.7937 | 479.3416 | 691.7533 | 0.221323 | 472.1965 | 561.9207 |
| YGR103W | 5700.222 | 5813.393 | 5955.018 | 6582.313 | 6613.992 | 6779.574 | 0.193492 | 7236.974 | 7303.213 |
| YBR216C | 473.2911 | 504.3086 | 427.8286 | 536.3632 | 456.2963 | 609.5648 | 0.189066 | 603.737  | 584.7487 |
| YDR143C | 950.0369 | 961.1529 | 978.1763 | 1035.118 | 1090.041 | 1054.753 | 0.138234 | 681.3122 | 911.3651 |
| YGL104C | 451.4115 | 453.8778 | 487.112  | 401.1531 | 448.2305 | 373.7621 | -0.18698 | 380.0058 | 394.2225 |
| YDR524C | 671.3594 | 711.9651 | 720.2934 | 808.5742 | 799.6708 | 936.362  | 0.27457  | 792.6156 | 771.7629 |
| YPL232W | 4208.952 | 4153.13  | 4080.675 | 4352.69  | 3864.692 | 3699.462 | -0.0623  | 3714.613 | 3607.706 |
| YER087W | 179.6434 | 173.0471 | 208.48   | 208.6354 | 186.6667 | 206.4497 | 0.10073  | 230.4769 | 205.4523 |
| YDR538W | 81.76076 | 78.11839 | 62.24758 | 50.14414 | 62.22223 | 55.77078 | -0.40174 | 93.31503 | 90.43411 |
| YER164W | 1422.177 | 1113.434 | 1443.551 | 1561.632 | 1438.025 | 1805.212 | 0.272032 | 1487.419 | 1708.59  |
| YOR271C | 3237.035 | 3265.151 | 3218.101 | 3416.965 | 3454.486 | 3056.63  | 0.030516 | 3134.486 | 2990.472 |
| YOR191W | 753.1202 | 842.492  | 992.0091 | 776.3387 | 859.5885 | 1392.313 | 0.226853 | 826.3439 | 1118.573 |
| YLR443W | 415.7131 | 566.6056 | 433.7569 | 440.5521 | 439.0124 | 456.929  | -0.08345 | 418.2312 | 410.9045 |
| YDR041W | 1294.353 | 1322.08  | 1438.611 | 1270.617 | 1116.543 | 1173.143 | -0.18772 | 1255.818 | 1287.15  |
| YGL106W | 5420.393 | 4615.907 | 5245.594 | 5233.794 | 5053.828 | 4664.198 | -0.0315  | 6295.954 | 5447.997 |
| YNL219C | 1714.673 | 1995.48  | 1772.574 | 1859.81  | 1981.893 | 1656.49  | 0.004064 | 1686.416 | 1811.316 |
| YLR147C | 609.1752 | 445.967  | 520.7059 | 523.8272 | 571.5227 | 498.0233 | 0.015956 | 555.3931 | 449.5365 |
| YPL270W | 1167.682 | 1160.899 | 992.9971 | 893.6402 | 898.7655 | 752.4163 | -0.3843  | 852.2023 | 835.857  |
| YLR243W | 1263.261 | 1361.633 | 1335.853 | 1279.571 | 1383.868 | 1174.122 | -0.04558 | 1241.202 | 1164.229 |
| YDL159W | 332.8008 | 291.7079 | 322.1065 | 273.1065 | 316.8725 | 349.3012 | -0.01122 | 312.5491 | 395.1005 |
| YNL033W | 28.789   | 13.84377 | 13.8328  | 9.849741 | 9.218108 | 6.849043 | -1.12348 | 2.248555 | 0.878001 |
| YLR071C | 1152.711 | 976.9743 | 1373.399 | 1038.7   | 1361.975 | 1753.355 | 0.245886 | 1292.919 | 1618.156 |
| YJR062C | 505.5348 | 557.706  | 486.124  | 468.3104 | 458.6009 | 516.6135 | -0.10208 | 500.3035 | 596.1627 |
| YGL121C | 909.7324 | 764.3737 | 702.5084 | 745.894  | 828.4774 | 763.1791 | -0.02391 | 926.4046 | 839.369  |
| YDR048C | 0        | 1.977681 | 0        | 0        | 1.152263 | 0        | -0.77934 | 4.49711  | 0        |
| YER072W | 3179.457 | 2904.224 | 2729.013 | 2368.415 | 2556.873 | 2349.222 | -0.27673 | 2838.801 | 2523.375 |
| YIL110W | 1203.38  | 1225.173 | 1218.274 | 1401.35  | 1336.626 | 1322.844 | 0.155129 | 1437.951 | 1336.318 |
| YOR091W | 4660.363 | 4713.802 | 4870.132 | 5670.765 | 5266.996 | 4852.058 | 0.14861  | 4855.754 | 4611.262 |
| YHR182W | 460.624  | 421.246  | 501.9329 | 427.1206 | 518.5186 | 503.8939 | 0.06695  | 365.3902 | 467.0966 |
| YJL023C | 299.4056 | 259.0762 | 311.2379 | 231.9166 | 290.3704 | 206.4497 | -0.25515 | 240.5954 | 228.2803 |
| YNL102W | 734.6952 | 691.1995 | 838.8602 | 729.7763 | 796.2141 | 1027.356 | 0.173035 | 819.5983 | 871.8551 |
| YIL062C | 2106.203 | 1935.161 | 2097.645 | 2012.929 | 1965.761 | 1764.118 | -0.09625 | 2289.029 | 2108.959 |
| YLR396C | 635.6611 | 671.4227 | 582.9535 | 513.9774 | 609.5474 | 579.2334 | -0.15054 | 573.3815 | 470.6086 |
| YLR206W | 2617.496 | 2348.496 | 2803.117 | 2576.155 | 2452.017 | 2578.175 | -0.03055 | 1815.708 | 2319.679 |
| YDR407C | 1050.223 | 761.4071 | 888.2631 | 927.6665 | 966.749  | 1078.235 | 0.138848 | 824.0954 | 1083.453 |
| YMR187C | 201.523  | 268.9646 | 200.5755 | 230.1258 | 238.5185 | 213.2988 | 0.023203 | 149.5289 | 208.0863 |
| YKR051W | 513.5957 | 463.7662 | 462.4106 | 431.5978 | 436.7079 | 375.7189 | -0.21083 | 364.2659 | 385.4425 |
| YDR165W | 2303.12  | 2462.213 | 2159.892 | 2596.75  | 2721.646 | 2487.181 | 0.172644 | 2318.26  | 2205.539 |

|                       |          |          |          |          |          |          |          |          |          |
|-----------------------|----------|----------|----------|----------|----------|----------|----------|----------|----------|
| YMR295C               | 2000.26  | 2249.612 | 2217.2   | 2156.198 | 2121.317 | 1974.481 | -0.0488  | 1941.627 | 1900.872 |
| YCR096C               | 2.30312  | 0        | 0.988057 | 0        | 0        | 0.978435 | -1.75006 | 0        | 0        |
| YDR363W- <del>f</del> | 2413.67  | 1961.859 | 2123.334 | 2097.995 | 2128.231 | 1951.977 | -0.073   | 2528.5   | 2441.721 |
| YJL081C               | 2040.564 | 1812.545 | 1910.902 | 1975.321 | 2099.424 | 2196.586 | 0.121699 | 2283.408 | 2112.471 |
| YBL007C               | 3116.121 | 2739.088 | 3112.379 | 2922.687 | 2805.762 | 3519.43  | 0.044402 | 2838.801 | 3592.78  |
| YGL133W               | 1193.016 | 1022.461 | 1071.054 | 1144.361 | 1212.181 | 1399.162 | 0.192518 | 970.2515 | 1007.067 |
| YPR063C               | 3856.574 | 3505.439 | 3526.375 | 3462.632 | 3724.116 | 3265.037 | -0.05904 | 3623.546 | 3201.192 |
| YPL015C               | 595.3565 | 672.4115 | 625.44   | 505.0231 | 554.2387 | 585.104  | -0.2033  | 697.052  | 776.1529 |
| YDL019C               | 2731.5   | 2094.364 | 2764.583 | 2363.938 | 2303.375 | 3039.018 | 0.021859 | 2190.093 | 2331.093 |
| YNL314W               | 476.7458 | 465.7438 | 386.3302 | 444.1338 | 426.3375 | 369.8483 | -0.09943 | 353.0231 | 357.3464 |
| YPL147W               | 87.51856 | 123.6051 | 124.4952 | 107.4517 | 108.3128 | 107.6278 | -0.05354 | 127.0434 | 127.3102 |
| YDR107C               | 333.9524 | 307.5294 | 383.366  | 324.146  | 232.7572 | 381.5895 | -0.12699 | 267.578  | 252.8643 |
| YLR149C- <del>f</del> | 1.15156  | 0        | 0        | 0.895431 | 1.152263 | 3.913739 | 2.37207  | 0        | 0.878001 |
| YIL042C               | 460.624  | 595.2819 | 440.6733 | 454.879  | 488.5597 | 326.7972 | -0.23657 | 373.2601 | 386.3205 |
| YDL031W               | 2984.843 | 2968.499 | 3121.272 | 3468.004 | 3402.634 | 4138.779 | 0.27883  | 2854.541 | 3272.31  |
| YJR051W               | 768.0905 | 875.1238 | 925.8092 | 911.5488 | 1017.449 | 966.6935 | 0.172688 | 1111.91  | 1010.579 |
| YLR423C               | 230.312  | 188.8685 | 243.062  | 180.8771 | 180.9054 | 177.0967 | -0.2974  | 219.2341 | 201.0622 |
| YER113C               | 914.3386 | 920.6104 | 1153.062 | 1124.661 | 1285.926 | 1550.819 | 0.406827 | 1249.072 | 1240.616 |
| YBR217W               | 278.6775 | 322.362  | 343.8438 | 291.0151 | 241.9753 | 253.4146 | -0.26486 | 290.0636 | 192.2822 |
| YCL063W               | 1159.621 | 1080.803 | 1135.277 | 1081.681 | 1091.194 | 1186.841 | -0.00685 | 947.7659 | 980.7272 |
| YKR045C               | 514.7473 | 511.2305 | 437.7092 | 581.1347 | 520.8231 | 411.921  | 0.048643 | 487.9364 | 432.8545 |
| YLL045C               | 22317.23 | 17404.58 | 18398.61 | 19991.39 | 18745.02 | 18233.13 | -0.02885 | 27307.58 | 21956.17 |
| YBR255W               | 344.3164 | 430.1456 | 359.6527 | 425.3297 | 394.0741 | 516.6135 | 0.236372 | 404.7399 | 546.1167 |
| YER046W               | 487.1099 | 428.1679 | 459.4464 | 368.0222 | 394.0741 | 273.9617 | -0.40804 | 504.8006 | 367.8825 |
| YLR417W               | 401.8944 | 377.737  | 377.4377 | 368.0222 | 292.6749 | 301.3579 | -0.26628 | 357.5202 | 359.1024 |
| YBL006C               | 869.4278 | 747.5634 | 795.3857 | 806.7834 | 783.5392 | 676.0984 | -0.09004 | 639.7139 | 654.9888 |
| YGL122C               | 3331.463 | 3173.189 | 3474.996 | 3405.324 | 3349.63  | 3342.333 | 0.016907 | 3601.061 | 3608.584 |
| YCR035C               | 2283.543 | 2057.777 | 2183.606 | 2278.872 | 2059.095 | 2063.519 | -0.02755 | 2041.688 | 2057.157 |
| YDR485C               | 538.9301 | 543.8622 | 671.8786 | 543.5266 | 652.1811 | 862.001  | 0.229838 | 657.7023 | 768.2509 |
| YMR188C               | 1084.769 | 1028.394 | 1163.931 | 1206.146 | 1205.268 | 1088.019 | 0.094704 | 1178.243 | 1053.601 |
| YOL139C               | 10854.6  | 10032.78 | 10498.1  | 10941.27 | 11034.07 | 11349.84 | 0.086516 | 10637.91 | 10128.62 |
| YBR098W               | 216.4933 | 188.8685 | 210.4561 | 189.8314 | 187.8189 | 259.2852 | 0.048644 | 188.8786 | 246.7183 |
| YCL004W               | 321.2852 | 404.4357 | 417.948  | 342.9501 | 361.8107 | 347.3443 | -0.12039 | 389      | 400.3685 |
| YER041W               | 452.5631 | 395.5362 | 415.9719 | 336.6821 | 351.4404 | 375.7189 | -0.24879 | 495.8064 | 407.3925 |
| YPL085W               | 1881.649 | 1653.341 | 2038.361 | 1844.588 | 2030.288 | 2245.508 | 0.135077 | 1975.356 | 2251.195 |
| YOL046C               | 0        | 0.98884  | 0.988057 | 0.895431 | 1.152263 | 0.978435 | 0.614236 | 0        | 7.024009 |
| Q0085                 | 0        | 0        | 1.976114 | 0        | 0        | 0        | #NUM!    | 0        | 0        |
| YBR077C               | 1297.808 | 1134.2   | 1181.716 | 1147.943 | 996.7079 | 973.5425 | -0.21278 | 1109.662 | 845.515  |
| YPR147C               | 798.031  | 842.492  | 829.9677 | 818.424  | 820.4116 | 819.9283 | -0.00686 | 765.633  | 667.2808 |
| YDL215C               | 1036.404 | 1173.754 | 1104.648 | 856.0321 | 867.6544 | 978.4347 | -0.29483 | 1218.717 | 1395.144 |
| YMR065W               | 287.89   | 264.0204 | 309.2618 | 268.6293 | 230.4527 | 219.1694 | -0.26181 | 256.3353 | 195.7942 |
| YOR061W               | 2252.451 | 2460.235 | 2364.42  | 2390.801 | 2469.301 | 2486.203 | 0.053859 | 2543.116 | 2605.029 |
| YBR104W               | 1987.592 | 2031.078 | 1869.404 | 2119.485 | 1980.741 | 1719.11  | -0.01694 | 2242.934 | 2116.861 |
| YIL019W               | 1759.584 | 1767.058 | 1730.088 | 2218.878 | 2027.984 | 1922.624 | 0.230985 | 1811.211 | 1878.922 |
| YBR002C               | 1354.234 | 1504.026 | 1250.88  | 1459.553 | 1482.963 | 1274.9   | 0.037523 | 1322.15  | 1252.908 |
| YOR165W               | 1837.89  | 1795.734 | 2133.215 | 1901.895 | 1992.264 | 2316.933 | 0.107066 | 1853.934 | 1835.9   |
| YDR054C               | 1944.985 | 2304.987 | 2461.25  | 2080.982 | 2090.206 | 1977.417 | -0.12632 | 2131.63  | 2345.141 |
| YHR060W               | 925.8542 | 716.9093 | 962.3673 | 982.2878 | 857.284  | 829.7126 | 0.035097 | 802.7341 | 754.2029 |
| YDR221W               | 889.0043 | 909.7332 | 903.0839 | 802.3062 | 903.3746 | 912.8796 | -0.04516 | 887.0549 | 1004.433 |
| YHL005C               | 2.30312  | 0.98884  | 2.96417  | 5.372586 | 2.304527 | 3.913739 | 0.889644 | 4.49711  | 0.878001 |
| YJR019C               | 492.8677 | 500.3533 | 400.163  | 361.7541 | 338.7655 | 306.2501 | -0.46886 | 338.4075 | 359.9804 |
| YLR275W               | 528.566  | 611.1034 | 531.5746 | 460.2515 | 585.3498 | 473.5624 | -0.13764 | 496.9306 | 390.7105 |
| YOR300W               | 1.15156  | 2.966521 | 5.928341 | 3.581724 | 1.152263 | 2.935304 | -0.38952 | 0        | 0.878001 |
| YOR215C               | 1089.376 | 980.9297 | 996.9493 | 955.4249 | 857.284  | 874.7206 | -0.19072 | 953.3873 | 964.9232 |

|           |          |          |          |          |          |          |          |          |          |
|-----------|----------|----------|----------|----------|----------|----------|----------|----------|----------|
| YJL071W   | 430.6834 | 443.0005 | 440.6733 | 452.1927 | 407.9013 | 403.1151 | -0.05726 | 409.237  | 470.6086 |
| YGR219W   | 1.15156  | 0        | 0        | 0.895431 | 0        | 2.935304 | 1.734032 | 4.49711  | 1.756002 |
| YPL149W   | 388.0757 | 570.5609 | 446.6017 | 425.3297 | 364.1153 | 317.9913 | -0.34359 | 342.9046 | 387.1985 |
| YBR144C   | 8.06092  | 12.85493 | 9.880568 | 3.581724 | 8.065844 | 1.956869 | -1.17869 | 6.745665 | 4.390005 |
| YJL019W   | 295.9509 | 336.2057 | 433.7569 | 359.0678 | 346.8313 | 536.1822 | 0.220669 | 326.0405 | 476.7546 |
| YOR298W   | 156.6122 | 135.4711 | 140.3041 | 124.4649 | 119.8354 | 129.1534 | -0.21139 | 133.789  | 98.33612 |
| YOR085W   | 3351.039 | 3304.705 | 3710.153 | 3713.352 | 3864.692 | 3839.378 | 0.139392 | 3386.324 | 3296.894 |
| YML073C   | 31586.14 | 23395.96 | 26292.19 | 28935.85 | 28437.86 | 24253.44 | 0.00625  | 31691.13 | 25886.98 |
| YLR389C   | 2163.781 | 2017.234 | 2202.379 | 2146.348 | 2182.387 | 2315.955 | 0.057878 | 2246.306 | 2472.451 |
| YOR281C   | 1174.591 | 1040.26  | 1148.122 | 1243.754 | 1023.21  | 1112.48  | 0.007049 | 1117.532 | 975.4592 |
| YPL249C   | 891.3074 | 840.5144 | 882.3347 | 750.3712 | 736.2964 | 961.8013 | -0.09447 | 880.3093 | 899.9511 |
| YBL052C   | 472.1396 | 482.5541 | 572.0849 | 552.4809 | 516.214  | 683.9259 | 0.199023 | 422.7283 | 421.4405 |
| YGL217C   | 0        | 1.977681 | 2.96417  | 2.686293 | 2.304527 | 4.892174 | 0.999896 | 0        | 0.878001 |
| YDR093W   | 991.4931 | 1041.249 | 1125.397 | 1092.426 | 1196.049 | 1447.105 | 0.242258 | 1160.254 | 1306.466 |
| YCR086W   | 436.4412 | 381.6924 | 449.5659 | 382.349  | 375.6379 | 435.4034 | -0.08715 | 421.6041 | 457.4386 |
| YOR141C   | 996.0993 | 1021.472 | 1115.516 | 965.2746 | 1117.696 | 1438.299 | 0.16851  | 1029.838 | 1294.174 |
| YKR049C   | 1639.821 | 1822.433 | 1662.9   | 1678.038 | 1542.881 | 1224.022 | -0.20543 | 1569.491 | 1569.866 |
| YJL150W   | 2.30312  | 2.966521 | 1.976114 | 0.895431 | 2.304527 | 0        | -1.17908 | 0        | 0        |
| YKL172W   | 5662.22  | 5433.678 | 5849.296 | 6562.614 | 6293.663 | 6438.1   | 0.187304 | 5694.465 | 5759.687 |
| YJL003W   | 367.3476 | 352.0272 | 344.8318 | 308.0283 | 274.2387 | 275.9186 | -0.31042 | 335.0347 | 259.0103 |
| YJR089W   | 713.9672 | 517.1635 | 668.9145 | 680.5276 | 695.9671 | 792.5321 | 0.191014 | 695.9278 | 744.5449 |
| YCL051W   | 522.8082 | 560.6725 | 655.0817 | 685.9002 | 660.247  | 757.3085 | 0.274867 | 649.8324 | 784.055  |
| YJL149W   | 413.41   | 298.6298 | 288.5126 | 327.7278 | 300.7408 | 391.3739 | 0.027549 | 376.633  | 418.8065 |
| YGL195W   | 3901.485 | 3463.908 | 3446.342 | 3423.233 | 3638.848 | 4009.625 | 0.034279 | 3606.682 | 3478.64  |
| YIL134C-1 | 8.06092  | 2.966521 | 0.988057 | 0.895431 | 0        | 0.978435 | -2.68081 | 4.49711  | 3.512004 |
| YMR194C-1 | 10.36404 | 4.944202 | 6.916398 | 12.53603 | 6.913581 | 5.870608 | 0.18813  | 17.98844 | 14.04802 |
| YOL006C   | 1421.025 | 1425.908 | 1494.93  | 1531.187 | 1458.766 | 1702.476 | 0.112021 | 1412.093 | 1730.54  |
| YJR018W   | 0        | 0        | 0        | 0        | 1.152263 | 1.956869 | #DIV/0!  | 0        | 0        |
| YBR179C   | 960.401  | 909.7332 | 994.9732 | 820.2148 | 912.5927 | 1288.599 | 0.076631 | 632.9682 | 880.6351 |
| YOR039W   | 1744.613 | 1658.285 | 1837.786 | 1932.34  | 1903.539 | 1708.347 | 0.081231 | 2157.488 | 2121.251 |
| YPL158C   | 731.2406 | 765.3625 | 768.7082 | 781.7113 | 822.7161 | 942.2326 | 0.168897 | 580.1272 | 693.6208 |
| YLR268W   | 2072.808 | 1788.812 | 2051.206 | 2063.969 | 2045.268 | 2087.001 | 0.067545 | 2382.344 | 2055.401 |
| YDR408C   | 2486.218 | 2681.735 | 2269.567 | 2543.024 | 2472.757 | 2041.993 | -0.07561 | 2467.789 | 2065.059 |
| YGR072W   | 793.4248 | 795.0277 | 797.3619 | 763.8027 | 842.3046 | 808.1871 | 0.01712  | 858.948  | 894.6831 |
| YIR013C   | 9.21248  | 2.966521 | 5.928341 | 3.581724 | 2.304527 | 1.956869 | -1.20708 | 11.24277 | 10.53601 |
| YDR238C   | 4068.461 | 3901.964 | 4486.766 | 4554.162 | 4621.729 | 5660.245 | 0.252137 | 4933.33  | 5009.874 |
| YDL184C   | 8878.527 | 6325.612 | 7693.01  | 7432.078 | 7497.778 | 7622.985 | -0.02186 | 11897.1  | 10470.16 |
| YBR218C   | 4835.4   | 5099.45  | 4815.789 | 4902.485 | 4847.572 | 5171.027 | 0.016575 | 4084.5   | 4374.201 |
| YBR048W   | 30005.05 | 24047.61 | 27147.85 | 28931.38 | 29016.3  | 26825.74 | 0.062123 | 36300.67 | 32104.11 |
| YOL116W   | 739.3015 | 760.4183 | 863.5617 | 867.6727 | 820.4116 | 918.7502 | 0.141508 | 701.5491 | 698.0109 |
| YFL002C   | 933.9151 | 1063.003 | 1089.827 | 1190.028 | 1162.634 | 1133.027 | 0.175357 | 987.1156 | 986.8732 |
| YAL069W   | 2.30312  | 0.98884  | 0.988057 | 0        | 0        | 0        | #NUM!    | 0        | 0        |
| YBL009W   | 1165.379 | 1083.769 | 1185.668 | 1156.001 | 1269.794 | 1461.781 | 0.178639 | 1274.931 | 1280.126 |
| YOR372C   | 751.9686 | 615.0587 | 775.6246 | 839.0189 | 775.4733 | 935.3836 | 0.251029 | 680.1879 | 879.7571 |
| YGL100W   | 1889.71  | 1877.808 | 1963.269 | 1804.294 | 1837.86  | 1857.069 | -0.05951 | 1653.812 | 1744.588 |
| YJR034W   | 503.2317 | 490.4649 | 444.6256 | 444.1338 | 532.3457 | 411.921  | -0.05096 | 690.3064 | 579.4807 |
| YML100W-1 | 0        | 3.955362 | 0        | 4.477155 | 3.45679  | 1.956869 | 1.32228  | 0        | 2.634003 |
| YDR236C   | 644.8736 | 663.5119 | 678.795  | 672.4687 | 724.7737 | 544.0097 | -0.03374 | 622.8497 | 537.3367 |
| YBR001C   | 200.3714 | 239.2994 | 191.683  | 182.6679 | 133.6626 | 171.2261 | -0.37288 | 234.974  | 198.4282 |
| YDR076W   | 170.4309 | 205.6788 | 211.4442 | 161.1776 | 193.5803 | 186.881  | -0.11739 | 183.2572 | 228.2803 |
| YMR125W   | 2047.474 | 1865.942 | 1982.042 | 1917.118 | 2181.235 | 2608.507 | 0.186034 | 2293.526 | 2330.215 |
| YFR053C   | 5407.725 | 4785.988 | 6025.171 | 3333.69  | 3242.469 | 3909.825 | -0.62921 | 6103.702 | 5885.241 |
| YGL050W   | 933.9151 | 951.2645 | 906.0481 | 1005.569 | 917.2017 | 868.85   | 0.000203 | 929.7775 | 747.1789 |
| YJR133W   | 846.3966 | 735.6973 | 781.5529 | 762.9072 | 715.5556 | 662.4003 | -0.14282 | 920.7833 | 828.833  |

|                   |          |          |          |          |          |          |          |          |          |
|-------------------|----------|----------|----------|----------|----------|----------|----------|----------|----------|
| YNL257C           | 753.1202 | 674.3892 | 719.3054 | 687.691  | 843.4569 | 968.6504 | 0.219614 | 820.7226 | 814.785  |
| YDR155C           | 14009.88 | 11715.78 | 13758.69 | 13532.65 | 13214.16 | 12833.15 | 0.003489 | 16002.97 | 14232.4  |
| YAR002C- <i>f</i> | 4093.796 | 3485.663 | 3905.789 | 4401.939 | 4368.231 | 3891.235 | 0.140656 | 5303.217 | 4491.853 |
| YLR001C           | 827.9716 | 849.4139 | 855.6572 | 760.2209 | 845.7614 | 930.4914 | 0.001953 | 674.5665 | 771.7629 |
| YMR036C           | 322.4368 | 356.9714 | 408.0675 | 382.349  | 320.3292 | 315.056  | -0.09562 | 357.5202 | 394.2225 |
| YJL055W           | 2328.454 | 2167.538 | 2115.43  | 2221.564 | 2151.276 | 1947.085 | -0.06505 | 2590.335 | 2425.039 |
| YOL069W           | 449.1084 | 335.2169 | 373.4855 | 391.3034 | 347.9836 | 347.3443 | -0.09154 | 341.7804 | 341.5424 |
| YMR290C           | 3668.87  | 3923.719 | 3683.476 | 4466.41  | 4526.091 | 4099.641 | 0.215438 | 3751.714 | 3798.233 |
| YER190W           | 0        | 1.977681 | 0.988057 | 0.895431 | 4.609054 | 5.870608 | 1.939415 | 0        | 0        |
| YOR041C           | 0        | 1.977681 | 0        | 0        | 0        | 0        | #NUM!    | 2.248555 | 1.756002 |
| YNL008C           | 488.2614 | 529.0296 | 455.4942 | 518.4546 | 565.7614 | 472.584  | 0.080036 | 614.9798 | 514.5086 |
| YDR254W           | 279.8291 | 243.2547 | 248.0023 | 258.7796 | 223.5391 | 321.905  | 0.060705 | 246.2168 | 280.0823 |
| YKL188C           | 209.5839 | 264.0204 | 195.6353 | 189.8314 | 217.7778 | 193.7301 | -0.15434 | 184.3815 | 157.1622 |
| YER181C           | 1.15156  | 0        | 6.916398 | 0        | 0        | 2.935304 | -1.45869 | 1.124277 | 0        |
| YPL167C           | 294.7993 | 265.9981 | 326.0588 | 223.8578 | 285.7613 | 349.3012 | -0.04618 | 285.5665 | 360.8584 |
| YGR258C           | 469.8365 | 468.7104 | 426.8405 | 428.9115 | 380.2469 | 493.1311 | -0.06826 | 482.315  | 528.5566 |
| YAL026C           | 673.6626 | 724.82   | 841.8244 | 742.3123 | 899.9178 | 1181.949 | 0.334135 | 782.4971 | 1105.403 |
| YOR058C           | 800.3342 | 817.771  | 849.7289 | 797.829  | 875.7202 | 1037.141 | 0.135415 | 776.8757 | 1014.969 |
| YMR207C           | 614.933  | 576.494  | 695.592  | 599.0434 | 638.354  | 687.8396 | 0.028927 | 520.5405 | 595.2847 |
| YGL178W           | 605.7205 | 655.6012 | 677.807  | 690.3773 | 778.9301 | 961.8013 | 0.326206 | 671.1937 | 795.469  |
| YPL051W           | 320.1337 | 365.871  | 308.2737 | 299.9694 | 253.498  | 243.6302 | -0.31889 | 358.6445 | 303.7884 |
| YGL131C           | 166.9762 | 183.9243 | 283.5723 | 218.4852 | 177.4486 | 343.4306 | 0.220727 | 221.4827 | 279.2043 |
| YBR126W- <i>f</i> | 23.0312  | 17.79913 | 40.51033 | 32.23552 | 35.72017 | 19.56869 | 0.105708 | 26.98266 | 21.07203 |
| YEL067C           | 43.75928 | 70.20767 | 82.00872 | 66.2619  | 64.52675 | 77.29634 | 0.086498 | 97.81214 | 112.3841 |
| YNL290W           | 1695.096 | 1530.725 | 1483.073 | 1689.678 | 1586.667 | 1582.129 | 0.045115 | 1838.194 | 1614.644 |
| YDR178W           | 2075.111 | 2270.378 | 2074.919 | 1863.392 | 1783.704 | 1692.692 | -0.26588 | 2276.662 | 1978.136 |
| YCL028W           | 3486.923 | 3554.881 | 3576.766 | 3545.011 | 3294.321 | 3137.84  | -0.08989 | 3495.379 | 3504.102 |
| YCR004C           | 6197.696 | 5592.881 | 5512.369 | 4868.458 | 4834.898 | 4352.078 | -0.29989 | 5327.951 | 4566.484 |
| YBL072C           | 29268.05 | 23343.56 | 28033.15 | 29747.11 | 28426.34 | 26946.09 | 0.07791  | 34205.02 | 31001.34 |
| YIL093C           | 2189.115 | 2130.951 | 1990.935 | 1943.085 | 1716.873 | 1692.692 | -0.23762 | 2012.457 | 1857.85  |
| YKL065C           | 3103.454 | 2414.748 | 2726.049 | 2363.938 | 2561.482 | 2199.521 | -0.21051 | 3128.864 | 2867.552 |
| YNL042W- <i>f</i> | 9.21248  | 4.944202 | 3.952227 | 0        | 0        | 5.870608 | -1.62512 | 0        | 0        |
| YHR139C           | 41.45616 | 33.62057 | 17.78502 | 41.18983 | 20.74074 | 26.41774 | -0.07188 | 13.49133 | 28.97404 |
| YKL082C           | 1160.772 | 1286.481 | 1499.87  | 1560.736 | 1488.724 | 1896.206 | 0.325363 | 1444.697 | 1735.808 |
| YPR132W           | 29053.86 | 21530.02 | 25159.88 | 26776.07 | 25765.76 | 25119.35 | 0.036067 | 29550.51 | 24221.42 |
| YNL011C           | 321.2852 | 332.2504 | 295.429  | 243.5572 | 254.6502 | 231.889  | -0.37827 | 202.3699 | 259.8883 |
| YJL100W           | 778.4545 | 1128.267 | 805.2663 | 883.7904 | 902.2223 | 728.9339 | -0.10882 | 585.7486 | 727.8629 |
| YLR151C           | 119.7622 | 150.3037 | 180.8144 | 124.4649 | 123.2922 | 73.3826  | -0.48954 | 148.4046 | 144.8702 |
| YGR245C           | 3302.674 | 3580.591 | 3192.412 | 4221.957 | 4004.116 | 4071.267 | 0.28747  | 3346.974 | 3771.015 |
| YER099C           | 1143.499 | 1467.439 | 1144.17  | 1345.833 | 1360.823 | 1119.329 | 0.026977 | 1222.09  | 1030.773 |
| YDR295C           | 549.2941 | 509.2528 | 555.2879 | 599.9388 | 420.5762 | 669.2493 | 0.066329 | 519.4162 | 589.1387 |
| YDL012C           | 1494.725 | 1244.95  | 1330.913 | 1550.887 | 1397.696 | 1180.971 | 0.020749 | 1680.795 | 1482.066 |
| YKR030W           | 593.0534 | 606.1592 | 550.3477 | 573.0759 | 617.6132 | 472.584  | -0.07297 | 467.6994 | 539.9707 |
| YLR323C           | 496.3223 | 531.9962 | 586.9058 | 534.5723 | 573.8272 | 650.6591 | 0.123069 | 648.7081 | 581.2367 |
| YHR069C- <i>f</i> | 0        | 0        | 0        | 0        | 0        | 0        | #DIV/0!  | 0        | 0        |
| YDR276C           | 6014.598 | 5451.477 | 5356.256 | 4826.373 | 5190.947 | 4935.225 | -0.16999 | 5802.396 | 4912.416 |
| YJR123W           | 83240.51 | 69106.1  | 79440.76 | 82446.81 | 79765.44 | 78138.77 | 0.052341 | 100339.5 | 87894.93 |
| YIL151C           | 561.9613 | 578.4717 | 676.8189 | 669.7824 | 730.535  | 810.1439 | 0.282589 | 684.685  | 715.5709 |
| YLL062C           | 1492.422 | 1764.091 | 1402.053 | 1727.286 | 1389.63  | 1270.008 | -0.08668 | 1260.315 | 1093.989 |
| YBL010C           | 449.1084 | 512.2193 | 449.5659 | 472.7876 | 447.0782 | 503.8939 | 0.013096 | 500.3035 | 582.9927 |
| YLR290C           | 733.5437 | 737.675  | 622.4758 | 608.8931 | 592.2634 | 681.969  | -0.15292 | 661.0752 | 517.1426 |
| YDL153C           | 2549.554 | 2361.351 | 2639.1   | 3153.708 | 3084.609 | 3437.241 | 0.357867 | 3227.801 | 3029.982 |
| YHR218W           | 0        | 0.98884  | 0        | 0.895431 | 0        | 1.956869 | 1.528316 | 2.248555 | 1.756002 |
| YBR058C           | 889.0043 | 815.7934 | 830.9558 | 918.7122 | 1057.778 | 1158.467 | 0.306031 | 979.2457 | 1060.625 |

|                   |          |          |          |          |          |          |          |          |          |
|-------------------|----------|----------|----------|----------|----------|----------|----------|----------|----------|
| YML025C           | 1545.393 | 1693.884 | 1582.867 | 1615.358 | 1454.156 | 1328.714 | -0.13275 | 1468.306 | 1485.578 |
| YBR016W           | 3567.533 | 3948.44  | 3505.626 | 3088.342 | 2836.873 | 2495.009 | -0.3884  | 3444.786 | 3531.32  |
| YOL097C           | 5489.486 | 5202.29  | 5454.074 | 6055.8   | 6057.449 | 5575.121 | 0.131638 | 6254.356 | 5900.167 |
| YHR213W- <i>f</i> | 5.7578   | 1.977681 | 7.904455 | 14.3269  | 10.37037 | 7.827478 | 1.056303 | 0        | 7.024009 |
| YDR159W           | 628.7517 | 670.4338 | 740.0546 | 737.8352 | 736.2964 | 1088.998 | 0.329875 | 807.2312 | 838.491  |
| YML095C           | 132.4294 | 205.6788 | 158.0891 | 117.3015 | 155.5556 | 109.5847 | -0.37567 | 145.0318 | 194.9162 |
| YNL201C           | 837.1841 | 972.0301 | 971.2599 | 948.2615 | 904.5268 | 1142.812 | 0.107514 | 753.2659 | 981.6052 |
| YGR266W           | 1248.291 | 1311.202 | 1206.417 | 1112.125 | 1155.72  | 1162.38  | -0.1347  | 1099.543 | 1050.967 |
| YIL106W           | 933.9151 | 1147.055 | 1021.651 | 1033.327 | 995.5556 | 798.4027 | -0.13407 | 817.3497 | 841.125  |
| YDR179W- <i>f</i> | 352.3773 | 274.8976 | 317.1662 | 293.7014 | 301.893  | 317.9913 | -0.04792 | 240.5954 | 280.9603 |
| YHR048W           | 491.7161 | 729.7642 | 566.1566 | 565.9124 | 558.8478 | 521.5057 | -0.11886 | 513.7948 | 472.3646 |
| YOR328W           | 261.4041 | 364.8821 | 263.8112 | 319.6689 | 278.8478 | 272.9833 | -0.03046 | 209.1156 | 280.0823 |
| YDL049C           | 193.4621 | 265.9981 | 306.2976 | 248.0344 | 274.2387 | 257.3283 | 0.025849 | 202.3699 | 192.2822 |
| YML115C           | 2237.481 | 2053.822 | 2050.218 | 2317.375 | 2389.794 | 2316.933 | 0.147485 | 2291.278 | 2301.241 |
| YDR014W- <i>f</i> | 1.15156  | 3.955362 | 2.96417  | 3.581724 | 3.45679  | 3.913739 | 0.440392 | 12.36705 | 4.390005 |
| YGL149W           | 1.15156  | 7.910723 | 4.940284 | 6.268017 | 9.218108 | 2.935304 | 0.395694 | 5.621387 | 27.21803 |
| YPL131W           | 81793    | 71127.29 | 76071.48 | 83408.5  | 78491.04 | 76536.1  | 0.058304 | 81181.83 | 72964.52 |
| YLR441C           | 41714.11 | 35971.05 | 38791.11 | 40976.71 | 39363.62 | 39192.18 | 0.037367 | 49141.04 | 43227.5  |
| YGR107W           | 16.12184 | 23.73217 | 12.84474 | 9.849741 | 18.43622 | 15.65496 | -0.2622  | 3.372832 | 7.024009 |
| YGR096W           | 278.6775 | 271.9311 | 286.5365 | 282.9562 | 240.8231 | 242.6518 | -0.12732 | 372.1358 | 287.9844 |
| YJR106W           | 142.7934 | 224.4668 | 250.9664 | 174.6091 | 169.3827 | 218.1909 | -0.1371  | 181.0087 | 275.6923 |
| YMR024W           | 1485.512 | 1429.863 | 1497.894 | 1397.768 | 1464.527 | 1550.819 | -5.1E-05 | 1464.934 | 1358.268 |
| YDL117W           | 796.8795 | 818.7599 | 840.8364 | 928.562  | 1016.296 | 1058.666 | 0.290067 | 643.0867 | 765.6169 |
| YKL154W           | 1408.358 | 1294.392 | 1346.721 | 1347.624 | 1371.194 | 1385.464 | 0.019396 | 1391.856 | 1188.813 |
| YOR072W           | 6.90936  | 10.87724 | 15.80891 | 14.3269  | 18.43622 | 17.61182 | 0.584438 | 7.869942 | 10.53601 |
| YBR230W- <i>f</i> | 832.5778 | 501.3421 | 690.6517 | 607.1022 | 677.5309 | 716.2142 | -0.01701 | 973.6243 | 835.857  |
| YNL023C           | 1166.53  | 1186.609 | 1198.513 | 1346.728 | 1366.584 | 1589.956 | 0.276943 | 1119.78  | 1149.303 |
| YDL001W           | 492.8677 | 541.8846 | 487.112  | 564.1215 | 546.1729 | 639.8963 | 0.201672 | 595.8671 | 612.8447 |
| YJL172W           | 1615.639 | 1442.718 | 1586.819 | 1475.67  | 1396.543 | 1416.773 | -0.1151  | 1294.043 | 1346.854 |
| YPL073C           | 2.30312  | 1.977681 | 0        | 0        | 0        | 8.805912 | 1.040592 | 1.124277 | 0.878001 |
| YHL029C           | 839.4872 | 1139.144 | 1200.489 | 984.9741 | 1098.107 | 1164.337 | 0.030666 | 1063.566 | 1193.203 |
| YKL116C           | 816.456  | 918.6328 | 858.6214 | 838.1234 | 895.3087 | 891.354  | 0.017183 | 894.9249 | 911.3651 |
| YNL085W           | 2205.237 | 1984.603 | 2036.385 | 2093.518 | 2190.453 | 2642.752 | 0.153815 | 2316.012 | 2449.623 |
| YHR081W           | 1399.145 | 1201.441 | 1326.96  | 1549.991 | 1556.708 | 1473.523 | 0.221789 | 1378.364 | 1447.824 |
| YLR362W           | 436.4412 | 384.6589 | 490.0762 | 425.3297 | 449.3828 | 493.1311 | 0.061042 | 466.5752 | 472.3646 |
| YBR124W           | 1.15156  | 0        | 0        | 0        | 0        | 0        | #NUM!    | 0        | 0        |
| YOR196C           | 1231.018 | 1414.042 | 1295.342 | 1254.499 | 1177.613 | 1127.157 | -0.14676 | 1312.032 | 1332.806 |
| YLR467W           | 8.06092  | 15.82145 | 15.80891 | 9.849741 | 8.065844 | 23.48243 | 0.06074  | 2.248555 | 7.90201  |
| YOR032W- <i>f</i> | 20.72808 | 8.899564 | 7.904455 | 12.53603 | 12.6749  | 11.74122 | -0.02247 | 10.1185  | 7.90201  |
| YNL236W           | 597.6596 | 619.0141 | 645.2011 | 685.0047 | 848.0659 | 902.1168 | 0.387277 | 672.3179 | 826.199  |
| YER059W           | 527.4145 | 417.2907 | 480.1956 | 404.7348 | 414.8148 | 416.8132 | -0.20476 | 446.3382 | 424.0745 |
| YDR206W           | 1852.86  | 1916.373 | 2055.158 | 1870.555 | 2153.58  | 2414.777 | 0.14471  | 2126.009 | 2187.101 |
| YKR090W           | 655.2376 | 606.1592 | 690.6517 | 668.887  | 611.8519 | 883.5265 | 0.148889 | 634.0925 | 891.1711 |
| YOR319W           | 986.8869 | 914.6774 | 797.3619 | 806.7834 | 840.0001 | 760.2438 | -0.16513 | 802.7341 | 686.5968 |
| YNL274C           | 1281.686 | 1296.37  | 1258.784 | 984.0787 | 1068.148 | 917.7718 | -0.36946 | 1283.925 | 1168.619 |
| YOR262W           | 720.8765 | 808.8715 | 734.1262 | 801.4108 | 786.9959 | 749.481  | 0.046412 | 816.2254 | 751.5689 |
| YIL115W- <i>f</i> | 4.60624  | 3.955362 | 0.988057 | 4.477155 | 5.761317 | 5.870608 | 0.754353 | 2.248555 | 3.512004 |
| YNR033W           | 852.1544 | 1010.595 | 924.8212 | 956.3203 | 912.5927 | 907.9874 | -0.00553 | 1025.341 | 974.5812 |
| YJR092W           | 1068.648 | 1178.698 | 1377.351 | 1209.727 | 1366.584 | 1497.984 | 0.16869  | 1168.124 | 1432.02  |
| YOR309C           | 270.6166 | 222.4891 | 247.0142 | 248.0344 | 218.9301 | 191.7732 | -0.16805 | 248.4653 | 208.9643 |
| YKL102C           | 12.66716 | 0.98884  | 1.976114 | 1.790862 | 2.304527 | 6.849043 | -0.51432 | 21.36127 | 1.756002 |
| YNR048W           | 454.8662 | 649.6682 | 469.327  | 455.7744 | 433.2511 | 523.4626 | -0.15607 | 397.9942 | 455.6826 |
| YLR119W           | 400.7429 | 330.2727 | 339.8915 | 332.2049 | 303.0453 | 283.7461 | -0.2207  | 351.8989 | 410.0265 |
| YPL199C           | 1963.41  | 1984.603 | 1916.83  | 1949.353 | 1820.576 | 1721.067 | -0.09502 | 2248.555 | 2074.717 |

|           |          |          |          |          |          |          |          |          |          |
|-----------|----------|----------|----------|----------|----------|----------|----------|----------|----------|
| YBR175W   | 499.777  | 471.6769 | 469.327  | 496.9642 | 482.7984 | 422.6838 | -0.03891 | 458.7052 | 408.2705 |
| YOR361C   | 7493.201 | 7307.531 | 7489.471 | 8082.16  | 8411.523 | 8371.487 | 0.157717 | 8685.044 | 8636.897 |
| YER013W   | 421.4709 | 467.7215 | 561.2163 | 485.3236 | 472.428  | 677.0768 | 0.17268  | 546.3989 | 589.1387 |
| YDL044C   | 355.832  | 463.7662 | 500.9448 | 484.4282 | 443.6214 | 497.0448 | 0.109926 | 457.5809 | 401.2465 |
| YGR225W   | 24.18276 | 14.83261 | 23.71336 | 5.372586 | 26.50206 | 28.37461 | -0.05818 | 15.73988 | 4.390005 |
| YLR195C   | 1632.912 | 1591.044 | 1699.458 | 1852.647 | 1766.42  | 2045.907 | 0.20241  | 1812.335 | 1860.484 |
| YNL316C   | 762.3327 | 759.4295 | 795.3857 | 804.9925 | 766.2552 | 735.7829 | -0.00631 | 743.1474 | 810.395  |
| YER046W-1 | 5.7578   | 5.933043 | 6.916398 | 2.686293 | 2.304527 | 0.978435 | -1.64024 | 3.372832 | 1.756002 |
| YDR063W   | 1753.826 | 1348.778 | 1710.326 | 1499.847 | 1492.181 | 1498.962 | -0.09988 | 1561.621 | 1482.944 |
| YDR520C   | 253.3432 | 264.0204 | 260.847  | 269.5247 | 311.1111 | 345.3875 | 0.250888 | 313.6734 | 294.1304 |
| YLR223C   | 1317.385 | 1422.941 | 1739.968 | 1598.344 | 1683.457 | 2118.311 | 0.269396 | 1132.147 | 1478.554 |
| YER003C   | 4810.066 | 4018.648 | 4874.084 | 4769.961 | 4930.535 | 5363.779 | 0.136661 | 5142.445 | 4733.304 |
| YBR060C   | 827.9716 | 650.657  | 790.4455 | 929.4574 | 932.1811 | 1146.725 | 0.406875 | 870.1908 | 1057.991 |
| YLR080W   | 103.6404 | 145.3595 | 154.1369 | 102.0791 | 133.6626 | 86.10225 | -0.32491 | 182.133  | 143.9922 |
| YDL060W   | 2787.927 | 3042.662 | 3225.017 | 3567.397 | 3698.766 | 4359.905 | 0.36048  | 2860.162 | 3253.872 |
| YKL023W   | 784.2123 | 785.1393 | 840.8364 | 702.9134 | 727.0782 | 681.969  | -0.19056 | 835.3382 | 816.541  |
| YNL200C   | 2432.095 | 2400.905 | 2304.149 | 2105.158 | 1951.934 | 1909.905 | -0.25834 | 2928.743 | 2685.805 |
| YEL007W   | 1045.616 | 1056.082 | 1101.683 | 1029.746 | 1080.823 | 1043.011 | -0.0226  | 1128.775 | 1137.889 |
| YPL263C   | 1581.092 | 1778.924 | 1764.669 | 2115.904 | 2099.424 | 2322.804 | 0.351415 | 2014.705 | 2083.497 |
| YGR021W   | 846.3966 | 951.2645 | 717.3293 | 835.4371 | 664.856  | 584.1255 | -0.27091 | 747.6445 | 775.2749 |
| YJL163C   | 254.4947 | 291.7079 | 304.3215 | 191.6222 | 212.0165 | 207.4282 | -0.47702 | 239.4711 | 239.6943 |
| YOR083W   | 118.6107 | 202.7123 | 181.8025 | 205.0537 | 182.0576 | 169.2692 | 0.145154 | 201.2457 | 194.9162 |
| YCR106W   | 434.1381 | 513.2082 | 606.6669 | 539.0495 | 557.6955 | 789.5968 | 0.279592 | 404.7399 | 490.8026 |
| YOR347C   | 616.0846 | 749.541  | 654.0936 | 482.6373 | 394.0741 | 468.6702 | -0.58614 | 731.9046 | 612.8447 |
| YKR038C   | 2060.141 | 2149.739 | 1936.591 | 2226.937 | 2008.395 | 1908.926 | -0.00052 | 2191.217 | 2087.887 |
| YOR204W   | 2798.291 | 3478.741 | 3448.318 | 3322.049 | 3643.457 | 4401.978 | 0.225091 | 2773.593 | 3356.598 |
| YAL002W   | 593.0534 | 446.9559 | 430.7928 | 441.4475 | 425.1852 | 560.6431 | -0.04334 | 527.2861 | 529.4346 |
| YIL003W   | 568.8706 | 564.6279 | 586.9058 | 620.5337 | 568.0659 | 486.2821 | -0.03869 | 639.7139 | 663.7688 |
| YGR132C   | 2565.676 | 2616.472 | 2554.127 | 2371.997 | 2386.338 | 2285.623 | -0.13525 | 2960.223 | 2857.893 |
| YOR136W   | 3127.637 | 2821.162 | 2696.407 | 2519.743 | 2584.527 | 2368.79  | -0.2102  | 2847.795 | 2812.237 |
| YDR464W   | 1022.585 | 905.7778 | 1232.107 | 1167.642 | 1094.65  | 1626.158 | 0.299056 | 745.396  | 1057.991 |
| YNL170W   | 2.30312  | 1.977681 | 0        | 4.477155 | 3.45679  | 2.935304 | 1.3443   | 0        | 0        |
| YLL054C   | 384.621  | 315.4401 | 328.0349 | 309.8191 | 346.8313 | 474.5408 | 0.137868 | 365.3902 | 397.7345 |
| YMR307W   | 32865.52 | 32378.59 | 33073.23 | 35661.44 | 36600.5  | 37876.19 | 0.163796 | 34348.93 | 32445.65 |
| YPR024W   | 1507.392 | 2149.739 | 1905.962 | 1710.273 | 1971.523 | 1850.22  | -0.00808 | 1729.139 | 2130.031 |
| YPR098C   | 1135.438 | 1080.803 | 1031.531 | 1107.648 | 1178.766 | 928.5345 | -0.01465 | 1169.249 | 978.0932 |
| YBR279W   | 1924.257 | 1882.752 | 2161.868 | 2017.406 | 2007.243 | 2108.527 | 0.039175 | 1987.723 | 2228.367 |
| YNL285W   | 2.30312  | 0        | 0        | 0.895431 | 0        | 0        | -1.36294 | 0        | 0        |
| YDR434W   | 1190.713 | 1300.325 | 1262.737 | 1125.557 | 1338.93  | 1221.087 | -0.02645 | 1352.506 | 1292.418 |
| YJR057W   | 624.1455 | 526.0631 | 477.2314 | 464.7287 | 538.107  | 568.4706 | -0.05064 | 516.0434 | 421.4405 |
| YIL005W   | 1335.81  | 1118.379 | 1335.853 | 1397.768 | 1438.025 | 1746.506 | 0.273858 | 1396.353 | 1610.254 |
| YBL077W   | 0        | 0        | 1.976114 | 0        | 1.152263 | 0        | -0.7782  | 0        | 0        |
| YDR526C   | 0        | 0        | 1.976114 | 0        | 1.152263 | 0        | -0.7782  | 0        | 0        |
| YML056C   | 7561.143 | 8419.976 | 7529.981 | 9017.886 | 8511.77  | 8427.258 | 0.142777 | 9511.387 | 8761.573 |
| YJL197W   | 956.9463 | 985.8739 | 998.9255 | 900.8036 | 854.9795 | 1148.682 | -0.0184  | 1101.792 | 1079.063 |
| YHR054C   | 0        | 0        | 0        | 0        | 0        | 0        | #DIV/0!  | 2.248555 | 0        |
| YPL152W-1 | 2.30312  | 2.966521 | 5.928341 | 5.372586 | 2.304527 | 1.956869 | -0.21703 | 6.745665 | 5.268006 |
| YMR235C   | 4957.466 | 4689.081 | 4617.19  | 4771.752 | 4788.807 | 4620.169 | -0.00842 | 4856.879 | 4478.683 |
| YLR079W   | 801.4857 | 857.3247 | 766.7321 | 838.1234 | 827.3252 | 806.2302 | 0.027184 | 812.8526 | 672.5488 |
| YMR178W   | 1632.912 | 1499.082 | 1515.679 | 1535.664 | 1358.519 | 1331.65  | -0.13727 | 1788.725 | 1467.14  |
| YOR248W   | 34.5468  | 23.73217 | 38.53422 | 46.56241 | 51.85186 | 49.90017 | 0.615384 | 68.58093 | 49.16806 |
| YOL029C   | 750.8171 | 859.3023 | 658.0458 | 784.3976 | 727.0782 | 653.5944 | -0.06711 | 833.0896 | 719.0829 |
| YFR034W-1 | 0        | 0.98884  | 0        | 2.686293 | 2.304527 | 0        | 2.335467 | 1.124277 | 0        |
| YDL247W   | 2.30312  | 3.955362 | 3.952227 | 0        | 0        | 1.956869 | -2.38346 | 1.124277 | 0        |



|                   |          |          |          |          |          |          |          |          |          |
|-------------------|----------|----------|----------|----------|----------|----------|----------|----------|----------|
| YGL006W           | 1791.827 | 1676.085 | 1725.147 | 1498.056 | 1488.724 | 1775.859 | -0.12482 | 1618.96  | 1518.064 |
| YGR129W           | 669.0563 | 670.4338 | 673.8548 | 616.0565 | 555.391  | 570.4274 | -0.20895 | 558.7659 | 550.5067 |
| YOL099C           | 19.57652 | 5.933043 | 12.84474 | 8.058879 | 6.913581 | 5.870608 | -0.87982 | 7.869942 | 2.634003 |
| YLR039C           | 639.1158 | 537.9292 | 565.1685 | 600.8342 | 533.498  | 716.2142 | 0.08703  | 609.3584 | 660.2568 |
| YPL003W           | 297.1025 | 328.295  | 309.2618 | 297.2831 | 271.9342 | 300.3795 | -0.10409 | 301.3064 | 238.8163 |
| YKL009W           | 6001.93  | 5819.326 | 5780.132 | 6781.099 | 6502.223 | 5928.336 | 0.126293 | 6637.734 | 5638.523 |
| YJL121C           | 3166.79  | 2725.244 | 2810.034 | 2814.34  | 3008.56  | 2373.683 | -0.08634 | 3563.96  | 2871.942 |
| YGR246C           | 768.0905 | 845.4586 | 688.6756 | 756.6392 | 863.0453 | 742.6319 | 0.037174 | 821.8468 | 817.419  |
| YOR320C           | 1761.887 | 1555.446 | 1691.553 | 1748.777 | 1757.202 | 1836.522 | 0.093025 | 1581.858 | 1604.986 |
| YDR271C           | 0        | 0        | 0        | 0        | 0        | 0        | #DIV/0!  | 0        | 1.756002 |
| YJL182C           | 0        | 0        | 0        | 0        | 0        | 0        | #DIV/0!  | 0        | 1.756002 |
| YLR062C           | 0        | 0        | 0        | 0        | 0        | 0        | #DIV/0!  | 0        | 1.756002 |
| YBR277C           | 0        | 0        | 0        | 0        | 0        | 0        | #DIV/0!  | 0        | 1.756002 |
| YMR193C- <i>f</i> | 0        | 0.98884  | 0        | 4.477155 | 0        | 3.913739 | 3.085015 | 1.124277 | 0        |
| YJL039C           | 1211.441 | 1080.803 | 1339.805 | 1293.898 | 1207.572 | 1878.595 | 0.270169 | 1424.46  | 1651.52  |
| YKL164C           | 10549.44 | 12421.81 | 11954.5  | 13079.56 | 13002.14 | 11985.83 | 0.12427  | 10252.29 | 10939.89 |
| YML099W- <i>f</i> | 5.7578   | 0.98884  | 0        | 0        | 1.152263 | 0        | -2.5497  | 3.372832 | 2.634003 |
| YKL053W           | 5.7578   | 5.933043 | 2.96417  | 1.790862 | 5.761317 | 1.956869 | -0.62402 | 1.124277 | 0        |
| YGR274C           | 760.0296 | 769.3179 | 837.8722 | 717.2403 | 814.6503 | 913.858  | 0.047083 | 728.5318 | 932.4371 |
| YGR145W           | 2292.756 | 2607.572 | 2319.957 | 3060.583 | 2887.572 | 3207.309 | 0.342577 | 2758.977 | 2540.935 |
| YMR185W           | 488.2614 | 450.9112 | 520.7059 | 499.6505 | 527.7367 | 703.4946 | 0.245659 | 555.3931 | 649.7208 |
| YOR075W           | 498.6255 | 420.2572 | 441.6614 | 403.8394 | 494.321  | 524.441  | 0.064348 | 537.4046 | 477.6326 |
| YBL008W           | 456.0177 | 496.3979 | 572.0849 | 481.7419 | 498.9301 | 592.9314 | 0.045735 | 538.5289 | 518.8986 |
| YHR075C           | 204.9777 | 197.7681 | 198.5994 | 151.3278 | 145.1852 | 162.4202 | -0.38991 | 181.0087 | 172.0882 |
| YIR018C- <i>f</i> | 88.67012 | 92.951   | 88.92511 | 73.42534 | 74.89713 | 75.33947 | -0.27456 | 104.5578 | 86.04411 |
| YLR208W           | 4237.741 | 4181.806 | 4252.597 | 4379.553 | 4270.288 | 4063.439 | 0.004676 | 4211.543 | 3861.449 |
| YFL005W           | 3023.996 | 3032.774 | 3105.463 | 3295.186 | 3131.852 | 2942.153 | 0.032225 | 3729.228 | 3260.896 |
| YLR076C           | 11.5156  | 12.85493 | 0.988057 | 11.6406  | 12.6749  | 7.827478 | 0.34203  | 6.745665 | 8.780011 |
| YGR118W           | 24132.09 | 19116.26 | 21899.29 | 24281.4  | 23616.79 | 21826.92 | 0.097965 | 24667.77 | 21262.55 |
| YKR074W           | 1381.872 | 1077.836 | 1180.728 | 1232.113 | 1201.811 | 1192.712 | -0.00548 | 1512.153 | 1358.268 |
| YBL057C           | 1690.49  | 1434.807 | 1484.061 | 1453.285 | 1625.844 | 1472.544 | -0.01817 | 1567.243 | 1418.85  |
| YKL128C           | 1083.618 | 1027.405 | 1020.663 | 1134.511 | 1126.914 | 1068.451 | 0.088529 | 1153.509 | 1151.937 |
| YFL066C           | 0        | 3.955362 | 3.952227 | 0        | 0        | 7.827478 | -0.01469 | 0        | 0        |
| YGL185C           | 766.9389 | 743.608  | 699.5442 | 749.4758 | 720.1647 | 744.5888 | 0.002699 | 649.8324 | 599.6747 |
| YMR060C           | 688.6328 | 596.2708 | 573.073  | 595.4616 | 591.1112 | 530.3116 | -0.11394 | 604.8613 | 515.3866 |
| YPL151C           | 533.1723 | 932.4765 | 719.3054 | 699.3316 | 720.1647 | 677.0768 | -0.05957 | 685.8093 | 616.3568 |
| YDL003W           | 1627.154 | 1444.696 | 1635.234 | 1730.868 | 1775.638 | 1974.481 | 0.219602 | 1399.725 | 1399.534 |
| YAL031W- <i>f</i> | 0        | 0        | 0        | 0        | 0        | 1.956869 | #DIV/0!  | 0        | 0        |
| YBR231C           | 789.9701 | 899.8448 | 701.5203 | 891.8493 | 890.6997 | 636.961  | 0.016898 | 672.3179 | 703.2789 |
| YKL037W           | 47.21396 | 50.43086 | 44.46256 | 40.2944  | 27.65432 | 42.07269 | -0.3692  | 44.9711  | 28.97404 |
| YBL054W           | 2166.084 | 2347.507 | 2339.719 | 2664.803 | 2795.391 | 3259.166 | 0.347421 | 2404.83  | 2530.399 |
| YBL029C- <i>f</i> | 358.1351 | 375.7594 | 316.1782 | 277.5836 | 282.3045 | 216.2341 | -0.43613 | 331.6619 | 323.9824 |
| YKL221W           | 27.63744 | 11.86609 | 38.53422 | 11.6406  | 13.82716 | 12.71965 | -1.03107 | 12.36705 | 14.04802 |
| YNL090W           | 192.3105 | 194.8016 | 205.5158 | 183.5634 | 127.9012 | 147.7436 | -0.36798 | 118.0491 | 129.0662 |
| YAL001C           | 739.3015 | 615.0587 | 741.0426 | 669.7824 | 654.4856 | 896.2462 | 0.083666 | 688.0578 | 858.6851 |
| YHR066W           | 3055.089 | 3053.539 | 3028.394 | 3518.149 | 3543.21  | 3393.212 | 0.194338 | 3232.298 | 3247.726 |
| YLR262C- <i>f</i> | 3318.796 | 2554.175 | 2684.55  | 2948.654 | 3018.93  | 2903.994 | 0.051998 | 3465.023 | 2925.5   |
| YLR368W           | 444.5021 | 481.5653 | 394.2347 | 522.9317 | 434.4033 | 431.4897 | 0.072996 | 409.237  | 384.5645 |
| YIL057C           | 0        | 1.977681 | 7.904455 | 0        | 0        | 0        | #NUM!    | 4.49711  | 5.268006 |
| YLR088W           | 799.1826 | 875.1238 | 782.541  | 871.2544 | 894.1565 | 815.0361 | 0.070813 | 825.2197 | 777.031  |
| YOR242C           | 49.51708 | 60.31927 | 24.70142 | 65.36646 | 42.63375 | 56.74921 | 0.292262 | 44.9711  | 50.04606 |
| YGR083C           | 2254.754 | 2521.543 | 2667.753 | 2768.673 | 2933.663 | 3288.519 | 0.27237  | 2740.988 | 2934.28  |
| YPL211W           | 2635.921 | 2544.286 | 2456.309 | 2955.818 | 2782.716 | 2553.715 | 0.118849 | 3031.052 | 2427.673 |
| YGR087C           | 34.5468  | 22.74333 | 26.67753 | 32.23552 | 19.58848 | 26.41774 | -0.1019  | 17.98844 | 14.04802 |

|                   |          |          |          |          |          |          |          |          |          |
|-------------------|----------|----------|----------|----------|----------|----------|----------|----------|----------|
| YGR007W           | 1971.471 | 1840.232 | 1707.362 | 1830.261 | 1830.947 | 1834.565 | -0.0061  | 1759.494 | 1736.686 |
| YOR008C- <i>f</i> | 10.36404 | 15.82145 | 15.80891 | 9.849741 | 3.45679  | 7.827478 | -0.99063 | 5.621387 | 5.268006 |
| YNL032W           | 766.9389 | 717.8982 | 668.9145 | 672.4687 | 669.4651 | 619.3492 | -0.13505 | 740.8989 | 714.6929 |
| YDR216W           | 274.0713 | 186.8908 | 250.9664 | 150.4324 | 176.2963 | 191.7732 | -0.45738 | 272.0751 | 318.7144 |
| YGR163W           | 710.5125 | 858.3135 | 600.7386 | 731.5671 | 687.9013 | 525.4194 | -0.15772 | 607.1098 | 580.3587 |
| YLR202C           | 9.21248  | 4.944202 | 2.96417  | 2.686293 | 8.065844 | 4.892174 | -0.13012 | 3.372832 | 2.634003 |
| YLR381W           | 305.1634 | 349.0607 | 359.6527 | 282.9562 | 392.9218 | 410.9426 | 0.100232 | 281.0694 | 296.7644 |
| YDR235W           | 437.5928 | 413.3353 | 449.5659 | 361.7541 | 448.2305 | 456.929  | -0.03774 | 534.0318 | 444.2685 |
| YER145C           | 2553.008 | 3936.574 | 2978.003 | 3617.541 | 3371.523 | 2440.216 | -0.00585 | 3995.682 | 3810.525 |
| YPL197C           | 1.15156  | 0        | 6.916398 | 5.372586 | 4.609054 | 0.978435 | 0.441982 | 3.372832 | 0        |
| YDL162C           | 0        | 7.910723 | 0.988057 | 5.372586 | 0        | 3.913739 | 0.0615   | 0        | 0.878001 |
| YNR030W           | 1607.578 | 1613.788 | 1474.181 | 1833.843 | 1919.671 | 1481.35  | 0.156859 | 1695.41  | 2041.352 |
| YML001W           | 2421.731 | 1854.076 | 2265.614 | 2191.12  | 2432.428 | 2027.317 | 0.023938 | 2670.159 | 2221.343 |
| YBL068W           | 1757.28  | 1865.942 | 1722.183 | 1849.065 | 1882.799 | 1798.363 | 0.049039 | 1868.549 | 1630.448 |
| YML067C           | 1239.078 | 1041.249 | 1242.975 | 1359.264 | 1269.794 | 1186.841 | 0.115095 | 1385.11  | 1330.172 |
| YDR484W           | 381.1663 | 289.7302 | 347.796  | 392.1988 | 312.2634 | 403.1151 | 0.120689 | 395.7457 | 432.8545 |
| YHR164C           | 407.6522 | 343.1276 | 368.5452 | 336.6821 | 286.9136 | 374.7405 | -0.16503 | 345.1532 | 381.9305 |
| YHR010W           | 26925.77 | 21621    | 24821.96 | 26740.26 | 27310.95 | 24997.05 | 0.107568 | 28873.69 | 24785.09 |
| YKLO49C           | 851.0028 | 784.1505 | 766.7321 | 799.6199 | 720.1647 | 814.0577 | -0.04146 | 667.8208 | 677.8168 |
| YOR206W           | 4273.439 | 4020.625 | 4341.522 | 4643.705 | 4894.815 | 5403.895 | 0.241921 | 4275.627 | 4324.155 |
| YDL022C- <i>f</i> | 1.15156  | 0        | 1.976114 | 0        | 0        | 4.892174 | 0.645386 | 0        | 0        |
| YMR021C           | 681.7235 | 523.0966 | 543.4313 | 510.3957 | 547.3251 | 668.2709 | -0.01849 | 612.7312 | 585.6267 |
| YLR232W           | 25.33432 | 5.933043 | 7.904455 | 11.6406  | 10.37037 | 8.805912 | -0.34609 | 10.1185  | 3.512004 |
| YAL003W           | 58727.25 | 48577.78 | 55644.4  | 59479.9  | 56939.1  | 51409.9  | 0.042567 | 67185.7  | 60478.47 |
| YDL136W           | 15282.35 | 11123.47 | 13964.21 | 15062.05 | 14528.89 | 13667.75 | 0.099705 | 15506.03 | 13856.61 |
| YLR307W           | 4.60624  | 3.955362 | 3.952227 | 7.163448 | 6.913581 | 5.870608 | 0.672695 | 4.49711  | 5.268006 |
| YFR010W- <i>f</i> | 4.60624  | 10.87724 | 1.976114 | 0.895431 | 4.609054 | 1.956869 | -1.22651 | 3.372832 | 0        |
| YPR114W           | 2784.472 | 2637.237 | 2661.825 | 2939.7   | 3008.56  | 2688.739 | 0.095544 | 2874.778 | 2555.861 |
| YOL005C           | 2877.748 | 2013.279 | 2480.023 | 2417.664 | 2576.461 | 2170.168 | -0.04105 | 2687.023 | 2193.247 |
| YGR184C           | 1948.439 | 1683.006 | 2003.779 | 2006.661 | 1866.667 | 2234.745 | 0.116244 | 1752.749 | 1831.51  |
| YNL227C           | 264.8588 | 237.3217 | 310.2498 | 345.6364 | 289.2181 | 332.6678 | 0.252051 | 299.0578 | 324.8604 |
| YDR256C           | 316.679  | 382.6812 | 411.0316 | 289.2242 | 344.5268 | 317.0128 | -0.22391 | 285.5665 | 289.7404 |
| YFR032C- <i>f</i> | 2.30312  | 4.944202 | 0        | 4.477155 | 5.761317 | 6.849043 | 1.237423 | 1.124277 | 0.878001 |
| YJL030W           | 634.5095 | 567.5944 | 579.0013 | 612.4748 | 498.9301 | 497.0448 | -0.1471  | 614.9798 | 626.8928 |
| YDR338C           | 350.0742 | 363.8933 | 428.8167 | 282.9562 | 369.8766 | 393.3308 | -0.12744 | 368.763  | 343.2984 |
| YDR117C           | 937.3698 | 697.1325 | 904.072  | 779.025  | 916.0495 | 952.9954 | 0.060923 | 992.737  | 914.8771 |
| YIR009W           | 408.8038 | 486.5095 | 413.9958 | 421.748  | 445.926  | 400.1798 | -0.04642 | 472.1965 | 477.6326 |
| YPR117W           | 690.936  | 701.0879 | 798.3499 | 742.3123 | 725.926  | 935.3836 | 0.134033 | 786.9942 | 885.0251 |
| YML119W           | 750.8171 | 709.9874 | 677.807  | 736.9397 | 631.4404 | 697.624  | -0.04983 | 730.7804 | 680.4508 |
| YIL023C           | 1039.859 | 1107.501 | 986.0807 | 1026.164 | 1048.56  | 901.1384 | -0.07444 | 951.1387 | 919.2671 |
| YBR264C           | 745.0593 | 607.148  | 740.0546 | 667.9915 | 631.4404 | 569.449  | -0.16289 | 700.4249 | 597.9187 |
| YML055W           | 751.9686 | 727.7866 | 650.1414 | 692.1682 | 646.4198 | 594.8883 | -0.13959 | 668.9451 | 604.9427 |
| YDR429C           | 7244.464 | 7263.033 | 7130.806 | 8137.677 | 7662.552 | 7073.105 | 0.080079 | 8531.018 | 8015.272 |
| YPR064W           | 76.00296 | 129.5381 | 124.4952 | 136.1055 | 120.9877 | 79.25321 | 0.027323 | 83.19653 | 78.1421  |
| YDR183W           | 345.468  | 369.8263 | 405.1033 | 412.7937 | 375.6379 | 354.1934 | 0.028341 | 341.7804 | 309.0564 |
| YNL339C           | 2.30312  | 0.98884  | 0        | 0        | 1.152263 | 0        | -1.51448 | 0        | 0        |
| YGL030W           | 32813.7  | 26869.76 | 29312.68 | 30816.26 | 31172.18 | 28740.54 | 0.027821 | 35942.03 | 29535.96 |
| YMR105W- <i>f</i> | 12.66716 | 11.86609 | 10.86863 | 15.22233 | 18.43622 | 19.56869 | 0.588339 | 13.49133 | 25.46203 |
| YPL004C           | 14905.79 | 13633.14 | 13859.47 | 12218.16 | 12310.78 | 12379.16 | -0.20007 | 13881.45 | 12765.26 |
| YDR339C           | 2556.463 | 2523.521 | 2398.014 | 2688.084 | 2787.325 | 2179.953 | 0.033819 | 2489.15  | 2295.095 |
| YML110C           | 3710.326 | 3184.066 | 3982.857 | 3675.744 | 3369.218 | 3289.498 | -0.07385 | 4244.147 | 4102.899 |
| YML085C           | 6369.278 | 5579.038 | 6153.618 | 6071.918 | 5657.614 | 6135.764 | -0.01898 | 5576.416 | 5789.539 |
| YBR260C           | 817.6076 | 708.9986 | 827.0036 | 782.6067 | 948.3128 | 891.354  | 0.155943 | 773.5029 | 923.6571 |
| YMR085W           | 100.1857 | 126.5716 | 79.04455 | 73.42534 | 71.44034 | 56.74921 | -0.60099 | 132.6647 | 101.8481 |

|                   |          |          |          |          |          |          |          |          |          |
|-------------------|----------|----------|----------|----------|----------|----------|----------|----------|----------|
| YMR257C           | 239.5245 | 259.0762 | 233.1814 | 210.4263 | 224.6914 | 328.7541 | 0.061916 | 211.3642 | 215.1103 |
| YOL017W           | 424.9256 | 387.6254 | 355.7005 | 417.2709 | 405.5967 | 434.425  | 0.10597  | 386.7515 | 398.6125 |
| YBL034C           | 546.991  | 412.3465 | 649.1533 | 479.951  | 520.8231 | 777.8556 | 0.145059 | 580.1272 | 680.4508 |
| YNL239W           | 3052.785 | 2839.95  | 2930.577 | 2781.209 | 2795.391 | 2955.851 | -0.04836 | 3002.945 | 2949.206 |
| YIL030C           | 1395.691 | 1564.346 | 1566.07  | 1817.725 | 1736.461 | 2110.484 | 0.323721 | 1679.671 | 1878.044 |
| YMR163C           | 260.2525 | 266.9869 | 274.6798 | 291.9105 | 223.5391 | 319.9482 | 0.059006 | 260.8324 | 198.4282 |
| YDR443C           | 515.8989 | 421.246  | 528.6104 | 432.4932 | 407.9013 | 723.0633 | 0.093096 | 410.3613 | 607.5767 |
| YGR169C- <i>f</i> | 2303.12  | 2231.813 | 2376.277 | 2581.528 | 2206.585 | 2017.532 | -0.02221 | 2145.121 | 2306.509 |
| YLR255C           | 6.90936  | 12.85493 | 12.84474 | 17.90862 | 14.97943 | 4.892174 | 0.21236  | 8.99422  | 7.90201  |
| YJR160C           | 19.57652 | 11.86609 | 20.74919 | 13.43147 | 13.82716 | 21.52556 | -0.09741 | 7.869942 | 5.268006 |
| YLR359W           | 5534.397 | 6625.231 | 6051.848 | 6510.679 | 6408.889 | 5979.215 | 0.053445 | 5589.908 | 5330.345 |
| YHR185C           | 0        | 2.966521 | 0        | 0        | 0        | 0        | #NUM!    | 0        | 0        |
| YLR374C           | 0        | 2.966521 | 0        | 0        | 0        | 0        | #NUM!    | 0        | 0        |
| YOR040W           | 257.9494 | 316.4289 | 256.8948 | 243.5572 | 197.0371 | 187.8595 | -0.40352 | 302.4306 | 295.8864 |
| YBL112C           | 0        | 0        | 0        | 0        | 0        | 0        | #DIV/0!  | 0        | 0.878001 |
| YLR217W           | 0        | 0        | 0        | 0        | 0        | 0        | #DIV/0!  | 0        | 0.878001 |
| YMR014W           | 1786.069 | 1798.701 | 1688.589 | 2305.735 | 2147.819 | 2151.578 | 0.324865 | 2011.332 | 2259.975 |
| YHR141C           | 23393.94 | 17400.63 | 20506.13 | 21869.11 | 22548.64 | 21073.53 | 0.095399 | 25512.1  | 20935.06 |
| YBR197C           | 195.7652 | 242.2659 | 258.8709 | 197.8903 | 207.4074 | 244.6087 | -0.10072 | 221.4827 | 237.0603 |
| YPL029W           | 481.3521 | 466.7327 | 415.9719 | 419.9572 | 465.5144 | 434.425  | -0.04748 | 421.6041 | 482.0226 |
| YMR048W           | 460.624  | 443.9894 | 384.3541 | 420.8526 | 395.2264 | 360.064  | -0.13215 | 403.6156 | 333.6404 |
| YNL024C           | 255.6463 | 317.4178 | 275.6679 | 269.5247 | 314.5679 | 234.8243 | -0.05159 | 284.4422 | 255.4983 |
| YHR057C           | 1406.055 | 1148.044 | 1195.549 | 1284.944 | 1258.272 | 1177.057 | -0.01135 | 1621.208 | 1375.828 |
| YPR054W           | 156.6122 | 253.1432 | 156.113  | 169.2365 | 154.4033 | 189.8163 | -0.14023 | 161.896  | 129.9442 |
| YJL050W           | 2762.592 | 2799.407 | 2779.404 | 3364.134 | 3581.235 | 4102.577 | 0.405416 | 3337.98  | 3493.566 |
| YLR015W           | 594.2049 | 625.936  | 716.3412 | 715.4494 | 729.3828 | 709.3652 | 0.153712 | 635.2168 | 576.8467 |
| YPR107C           | 363.8929 | 403.4469 | 440.6733 | 377.8719 | 341.07   | 323.8619 | -0.21217 | 450.8353 | 392.4665 |
| YER167W           | 989.19   | 879.0791 | 1075.006 | 1053.922 | 1231.77  | 1287.62  | 0.27984  | 815.1012 | 961.4112 |
| YMR116C           | 57844.01 | 50486.24 | 54769.97 | 58285.4  | 56350.29 | 53621.16 | 0.044907 | 63659.96 | 52579.09 |
| YPL225W           | 3248.551 | 2849.838 | 3008.633 | 3129.531 | 3023.539 | 2868.771 | -0.01356 | 3209.812 | 3062.468 |
| YCR077C           | 2092.384 | 2269.389 | 2271.543 | 2073.818 | 2249.218 | 2444.13  | 0.028822 | 2185.595 | 2440.843 |
| YKL207W           | 2995.207 | 2343.552 | 2413.823 | 2877.915 | 2611.029 | 2236.702 | -0.00502 | 2564.477 | 2319.679 |
| YDR336W           | 322.4368 | 340.1611 | 311.2379 | 306.2374 | 345.679  | 250.4793 | -0.10992 | 273.1994 | 248.4743 |
| YLR233C           | 368.4992 | 308.5182 | 313.214  | 315.1917 | 309.9589 | 392.3523 | 0.039195 | 267.578  | 284.4723 |
| YBR152W           | 142.7934 | 226.4445 | 212.4322 | 176.3999 | 182.0576 | 272.9833 | 0.118446 | 174.263  | 228.2803 |
| YKL101W           | 2478.157 | 1892.641 | 2542.27  | 2487.507 | 2596.05  | 3554.653 | 0.321406 | 2133.879 | 2977.302 |
| YGL115W           | 1804.494 | 1659.274 | 1626.342 | 1692.365 | 1645.432 | 1531.25  | -0.06406 | 2012.457 | 1836.778 |
| YDL069C           | 137.0356 | 136.46   | 137.3399 | 168.341  | 138.2716 | 128.1749 | 0.08175  | 158.5231 | 125.5542 |
| YIL100W           | 0        | 0.98884  | 0        | 0        | 1.152263 | 0        | 0.220661 | 1.124277 | 0        |
| YBR198C           | 1318.536 | 1645.43  | 1351.662 | 1475.67  | 1410.37  | 1511.682 | 0.027186 | 1434.578 | 1656.788 |
| YOR312C           | 33705.01 | 26795.6  | 31723.54 | 34219.79 | 32702.39 | 31231.64 | 0.0899   | 35189.89 | 30684.38 |
| YAL015C           | 579.2346 | 572.5386 | 662.9861 | 671.5733 | 591.1112 | 576.298  | 0.019129 | 717.289  | 648.8428 |
| YIL027C           | 1224.108 | 960.1641 | 1080.934 | 1225.845 | 1162.634 | 1127.157 | 0.106611 | 1150.136 | 1094.867 |
| YIR021W           | 313.2243 | 340.1611 | 261.8351 | 226.544  | 252.3457 | 278.8539 | -0.27241 | 279.9451 | 226.5243 |
| YLR249W           | 72638.1  | 70798.01 | 83103.48 | 83618.93 | 83195.73 | 106898.9 | 0.272904 | 88617.8  | 92477.22 |
| YLR376C           | 204.9777 | 170.0806 | 173.898  | 160.2822 | 175.144  | 159.4849 | -0.14952 | 182.133  | 194.9162 |
| YLR409C           | 2367.607 | 2571.974 | 2529.425 | 2920.896 | 2876.05  | 3468.551 | 0.310952 | 2577.968 | 2694.585 |
| YNL005C           | 1220.654 | 1345.812 | 1223.214 | 1369.114 | 1329.712 | 1195.647 | 0.039352 | 1223.214 | 1432.02  |
| YEL068C           | 680.5719 | 710.9763 | 685.7114 | 696.6453 | 697.1194 | 665.3356 | -0.01267 | 722.9104 | 635.6728 |
| YFR014C           | 1535.029 | 1510.948 | 1523.584 | 1473.879 | 1268.642 | 1364.916 | -0.15382 | 1378.364 | 1288.906 |
| YJL158C           | 19822.95 | 18984.75 | 19001.32 | 20323.6  | 20100.08 | 17997.33 | 0.015193 | 19888.47 | 17045.51 |
| YDR344C           | 14.97028 | 24.72101 | 56.31924 | 28.65379 | 21.89301 | 41.09426 | -0.0672  | 42.72254 | 56.19207 |
| YDR523C           | 50.66864 | 49.44202 | 46.43867 | 29.54922 | 53.00412 | 48.92174 | -0.1566  | 26.98266 | 51.80206 |
| YDL159W- <i>f</i> | 4.60624  | 0        | 2.96417  | 10.74517 | 5.761317 | 6.849043 | 1.625321 | 10.1185  | 2.634003 |

|           |          |          |          |          |          |          |          |          |          |
|-----------|----------|----------|----------|----------|----------|----------|----------|----------|----------|
| YHR178W   | 360.4383 | 437.0675 | 385.3422 | 371.6039 | 375.6379 | 443.2309 | 0.00927  | 376.633  | 395.9785 |
| YDR137W   | 670.2079 | 496.3979 | 650.1414 | 630.3834 | 667.1605 | 692.7318 | 0.131611 | 654.3295 | 744.5449 |
| YNL020C   | 669.0563 | 603.1927 | 626.428  | 616.952  | 631.4404 | 649.6807 | -0.00046 | 694.8035 | 637.4288 |
| YOR375C   | 13107.06 | 12666.06 | 12710.36 | 12750.94 | 12195.56 | 11484.87 | -0.07906 | 13293.46 | 12378.06 |
| YHR142W   | 1060.587 | 1155.954 | 1076.982 | 1090.635 | 1085.432 | 975.4994 | -0.06356 | 1147.887 | 878.0011 |
| YPL142C   | 9.21248  | 6.921883 | 0.988057 | 3.581724 | 5.761317 | 12.71965 | 0.365722 | 16.86416 | 7.90201  |
| YFR032C   | 25.33432 | 49.44202 | 37.54616 | 31.34009 | 46.09054 | 27.39617 | -0.09964 | 33.72832 | 35.12004 |
| YPR012W   | 64.48736 | 62.29695 | 63.23564 | 85.96138 | 57.61317 | 47.9433  | 0.011328 | 49.46821 | 47.41206 |
| YJL062W   | 1084.769 | 1110.468 | 1164.919 | 1094.217 | 1353.91  | 1491.135 | 0.229397 | 1020.844 | 1116.817 |
| YFR048W   | 614.933  | 585.3935 | 605.6788 | 630.3834 | 659.0947 | 725.9986 | 0.158319 | 510.422  | 711.1809 |
| YHR132C   | 2387.184 | 2582.851 | 2379.241 | 2556.456 | 2481.976 | 2350.2   | 0.007705 | 2477.908 | 2386.407 |
| YDR034C   | 627.6002 | 643.7351 | 767.7202 | 683.2139 | 792.7573 | 905.0521 | 0.223681 | 771.2544 | 772.6409 |
| YNL029C   | 470.988  | 381.6924 | 390.2824 | 405.6303 | 511.605  | 459.8643 | 0.14785  | 530.659  | 467.9746 |
| YMR019W   | 776.1514 | 631.869  | 771.6724 | 806.7834 | 805.4322 | 1024.421 | 0.274574 | 815.1012 | 907.8531 |
| YMR228W   | 456.0177 | 551.773  | 413.0078 | 520.2454 | 525.4321 | 386.4817 | 0.01149  | 430.5983 | 426.7085 |
| YHL038C   | 641.4189 | 621.9806 | 529.5985 | 573.0759 | 527.7367 | 530.3116 | -0.13651 | 617.2283 | 632.1608 |
| YFL041W   | 1067.496 | 1191.553 | 1161.955 | 1167.642 | 1175.309 | 1156.51  | 0.032713 | 1291.795 | 1432.898 |
| YGL142C   | 603.4174 | 682.2999 | 557.264  | 631.2789 | 668.3128 | 666.314  | 0.093153 | 760.0116 | 718.2049 |
| YDR417C   | 5.7578   | 4.944202 | 0        | 1.790862 | 10.37037 | 2.935304 | 0.496337 | 1.124277 | 1.756002 |
| YBR015C   | 3579.048 | 3859.444 | 4003.606 | 4108.238 | 4212.675 | 4175.959 | 0.127215 | 3830.413 | 3623.51  |
| YNR031C   | 939.6729 | 805.905  | 870.4781 | 808.5742 | 840.0001 | 951.0385 | -0.0091  | 857.8237 | 870.0991 |
| YBR153W   | 686.3297 | 759.4295 | 729.1859 | 664.4098 | 662.5515 | 639.8963 | -0.14509 | 710.5434 | 568.9447 |
| YCR093W   | 1682.429 | 1469.417 | 1988.958 | 1754.149 | 2038.354 | 2697.545 | 0.336235 | 1769.613 | 2348.653 |
| YCL045C   | 2441.307 | 2474.079 | 2738.894 | 2760.614 | 2786.173 | 2927.477 | 0.146821 | 2589.211 | 3055.444 |
| YIL049W   | 200.3714 | 170.0806 | 189.7069 | 168.341  | 175.144  | 132.0887 | -0.23617 | 229.3526 | 167.6982 |
| YBR257W   | 506.6864 | 574.5163 | 522.6821 | 585.6119 | 566.9136 | 487.2605 | 0.031937 | 465.4509 | 481.1446 |
| YPL040C   | 682.875  | 689.2218 | 727.2098 | 629.488  | 640.6585 | 723.0633 | -0.07482 | 512.6705 | 677.8168 |
| YML002W   | 366.1961 | 369.8263 | 420.9122 | 369.813  | 407.9013 | 471.6055 | 0.110836 | 421.6041 | 460.0726 |
| YKL131W   | 2.30312  | 1.977681 | 1.976114 | 1.790862 | 1.152263 | 0        | -1.0881  | 6.745665 | 3.512004 |
| YIL017C   | 446.8053 | 416.3018 | 480.1956 | 392.1988 | 354.8971 | 464.7565 | -0.14857 | 328.289  | 384.5645 |
| YNL264C   | 1263.261 | 1230.117 | 1364.506 | 1198.982 | 1236.379 | 1260.224 | -0.06201 | 1170.373 | 1062.381 |
| YMR034C   | 119.7622 | 113.7166 | 97.81763 | 83.27509 | 73.74486 | 87.08069 | -0.44065 | 95.56359 | 72.87409 |
| YHR206W   | 1583.395 | 1635.542 | 1789.371 | 1766.685 | 1896.626 | 2257.249 | 0.24141  | 1735.884 | 2041.352 |
| YOR028C   | 571.1737 | 540.8957 | 606.6669 | 192.5177 | 186.6667 | 165.3555 | -1.65824 | 433.9711 | 432.8545 |
| YGR112W   | 559.6581 | 561.6614 | 531.5746 | 503.2322 | 490.8642 | 482.3683 | -0.16285 | 546.3989 | 494.3146 |
| YKR006C   | 1662.853 | 1701.794 | 1507.775 | 1604.612 | 1447.243 | 1410.903 | -0.1267  | 1690.913 | 1496.992 |
| YDR278C   | 0        | 0        | 0        | 0        | 2.304527 | 0        | #DIV/0!  | 0        | 0        |
| YGR291C   | 0        | 0        | 0        | 0        | 2.304527 | 0        | #DIV/0!  | 0        | 0        |
| YMR046W-1 | 0        | 0        | 0        | 0        | 2.304527 | 0        | #DIV/0!  | 0        | 0        |
| YJL175W   | 0        | 0        | 0        | 0        | 1.152263 | 0.978435 | #DIV/0!  | 0        | 0        |
| YNR050C   | 2702.711 | 2418.704 | 2541.282 | 2599.436 | 2689.383 | 2672.105 | 0.055084 | 2349.74  | 2141.445 |
| YOR286W   | 2022.139 | 1676.085 | 1711.314 | 1704.901 | 1573.992 | 1540.056 | -0.16679 | 1956.243 | 1639.228 |
| YNR010W   | 337.4071 | 250.1766 | 269.7395 | 281.1653 | 282.3045 | 204.4929 | -0.1588  | 319.2948 | 259.0103 |
| YOR201C   | 727.7859 | 748.5522 | 687.6876 | 688.5865 | 639.5062 | 575.3196 | -0.18513 | 621.7254 | 632.1608 |
| YOR086C   | 4403.565 | 3668.598 | 4425.507 | 4344.631 | 4363.622 | 5468.472 | 0.181865 | 4051.896 | 4141.531 |
| YIL130W   | 704.7547 | 960.1641 | 893.2034 | 904.3853 | 978.2717 | 1389.377 | 0.355103 | 640.8382 | 893.8051 |
| YHR005C   | 3188.669 | 3532.138 | 3190.435 | 3586.201 | 3468.313 | 3148.603 | 0.041872 | 3714.613 | 3536.588 |
| YNL159C   | 534.3238 | 623.9583 | 690.6517 | 436.0749 | 503.5391 | 504.8723 | -0.35614 | 526.1619 | 515.3866 |
| YGL005C   | 608.0236 | 491.4537 | 529.5985 | 580.2393 | 497.7778 | 578.2549 | 0.023886 | 607.1098 | 647.9648 |
| YER178W   | 8252.079 | 8760.137 | 8232.489 | 8416.156 | 8100.412 | 7246.287 | -0.08727 | 9594.584 | 9028.485 |
| YDL090C   | 611.4783 | 619.0141 | 583.9416 | 560.5398 | 540.4116 | 554.7725 | -0.13206 | 596.9913 | 546.1167 |
| YML099C   | 505.5348 | 637.8021 | 634.3325 | 717.2403 | 667.1605 | 885.4834 | 0.352632 | 589.1214 | 760.3489 |
| YPL181W   | 742.7562 | 794.0389 | 854.6692 | 778.1296 | 810.0412 | 831.6695 | 0.017018 | 806.107  | 831.467  |
| YDR413C   | 6.90936  | 7.910723 | 4.940284 | 5.372586 | 3.45679  | 3.913739 | -0.63289 | 3.372832 | 3.512004 |

|                   |          |          |          |          |          |          |          |          |          |
|-------------------|----------|----------|----------|----------|----------|----------|----------|----------|----------|
| YER077C           | 474.4427 | 662.5231 | 468.3389 | 578.4484 | 533.498  | 577.2765 | 0.073513 | 580.1272 | 625.1368 |
| YPL154C           | 9461.216 | 8887.698 | 8769.004 | 8629.269 | 8917.367 | 8429.215 | -0.06208 | 11286.62 | 9705.424 |
| YKL040C           | 1324.294 | 1254.839 | 1290.402 | 1269.721 | 1326.255 | 1378.615 | 0.038646 | 1233.332 | 1129.987 |
| YPL280W           | 58.72956 | 45.48666 | 27.66559 | 47.45784 | 53.00412 | 19.56869 | -0.13584 | 41.59827 | 27.21803 |
| YDL078C           | 4532.54  | 4434.949 | 4713.031 | 4491.482 | 4445.432 | 4238.579 | -0.05427 | 4621.905 | 4267.085 |
| YHR058C           | 589.5987 | 701.0879 | 628.4041 | 677.8413 | 589.9589 | 661.4219 | 0.007596 | 684.685  | 682.2068 |
| YOR044W           | 489.413  | 557.706  | 562.2043 | 385.0353 | 369.8766 | 374.7405 | -0.51058 | 363.1416 | 334.5184 |
| YGR067C           | 32.24368 | 15.82145 | 41.49839 | 42.08526 | 34.5679  | 20.54713 | 0.11805  | 13.49133 | 26.34003 |
| YGL189C           | 41840.78 | 30637.24 | 36735.95 | 39005.87 | 39180.41 | 37802.8  | 0.086832 | 44448.31 | 37936.67 |
| YJL102W           | 330.4977 | 304.5629 | 372.4974 | 300.8648 | 244.2799 | 309.1854 | -0.238   | 317.0462 | 367.8825 |
| YIL177C           | 0        | 0        | 0.988057 | 1.790862 | 0        | 1.956869 | 1.923352 | 0        | 0        |
| YJL146W           | 621.8424 | 671.4227 | 627.4161 | 592.7753 | 638.354  | 581.1902 | -0.08378 | 519.4162 | 466.2186 |
| YOR109W           | 1624.851 | 1547.535 | 1580.891 | 1502.533 | 1527.901 | 1954.913 | 0.068771 | 1500.91  | 1458.36  |
| YMR005W           | 1905.832 | 1981.636 | 1943.508 | 2118.59  | 2027.984 | 2096.786 | 0.098585 | 1778.607 | 1806.926 |
| YKR086W           | 586.144  | 624.9472 | 674.8428 | 621.4291 | 663.7038 | 818.9499 | 0.157912 | 628.4711 | 709.4249 |
| YBR138C           | 207.2808 | 203.7011 | 182.7905 | 193.4131 | 210.8642 | 244.6087 | 0.128055 | 200.1214 | 214.2323 |
| YPL098C           | 1541.939 | 1406.131 | 1443.551 | 1270.617 | 1370.041 | 1188.798 | -0.19761 | 1614.462 | 1243.25  |
| YBR181C           | 45967.97 | 35921.61 | 41595.22 | 45897.11 | 41981.57 | 39079.66 | 0.040022 | 52927.61 | 46196.03 |
| YBR188C           | 477.8974 | 428.1679 | 432.7689 | 406.5257 | 419.4239 | 338.5384 | -0.20128 | 405.8642 | 342.4204 |
| YER054C           | 238.3729 | 216.5561 | 249.9784 | 199.6811 | 205.1029 | 163.3986 | -0.31108 | 184.3815 | 253.7423 |
| YDL166C           | 1308.172 | 1187.597 | 1255.82  | 1352.996 | 1359.671 | 1105.631 | 0.025428 | 1291.795 | 1109.793 |
| YJR071W           | 5.7578   | 13.84377 | 11.85668 | 11.6406  | 9.218108 | 8.805912 | -0.08469 | 4.49711  | 7.90201  |
| YOR211C           | 1112.407 | 953.2422 | 1079.946 | 967.9609 | 1096.955 | 1259.245 | 0.079657 | 934.2746 | 934.1931 |
| YNL047C           | 609.1752 | 610.1145 | 549.3596 | 655.4555 | 596.8725 | 674.1415 | 0.123311 | 738.6503 | 623.3808 |
| YKR017C           | 276.3744 | 228.4221 | 235.1575 | 184.4588 | 241.9753 | 206.4497 | -0.22549 | 225.9798 | 188.7702 |
| YOR243C           | 2479.309 | 2569.996 | 2609.458 | 2995.217 | 3169.877 | 3391.255 | 0.319348 | 3077.147 | 3020.324 |
| YPL023C           | 1412.964 | 1572.256 | 1514.691 | 1584.017 | 1459.918 | 1394.269 | -0.01992 | 1459.312 | 1859.606 |
| YML103C           | 1408.358 | 1364.6   | 1454.42  | 1490.893 | 1567.078 | 2019.489 | 0.264344 | 1660.558 | 1649.764 |
| YGR051C           | 73.69984 | 89.98448 | 63.23564 | 77.00707 | 81.81071 | 70.4473  | 0.014833 | 80.94798 | 70.24009 |
| YDR022C           | 495.1708 | 407.4023 | 448.5778 | 357.277  | 407.9013 | 298.4226 | -0.34523 | 367.6387 | 396.8565 |
| YOR129C           | 435.2897 | 602.2038 | 559.2402 | 471.8922 | 550.7819 | 578.2549 | 0.003786 | 401.3671 | 453.0486 |
| YPR168W           | 80.6092  | 116.6832 | 149.1966 | 119.9878 | 150.9465 | 184.9242 | 0.395777 | 133.789  | 158.0402 |
| YKL096W- <i>f</i> | 71970.19 | 63183.94 | 65688.98 | 76949.76 | 80812.85 | 68950.29 | 0.174798 | 79674.17 | 65645.51 |
| YLR252W           | 92.1248  | 71.19651 | 57.3073  | 47.45784 | 31.11111 | 47.9433  | -0.80234 | 56.21387 | 55.31407 |
| YAL019W           | 1309.324 | 1364.6   | 1618.437 | 1574.168 | 1762.963 | 2399.122 | 0.418337 | 1482.922 | 1996.574 |
| YLR209C           | 962.7041 | 940.3873 | 943.5943 | 1044.968 | 950.6174 | 996.0465 | 0.071649 | 1034.335 | 907.8531 |
| YLR444C           | 0        | 0        | 0        | 0        | 0        | 0        | #DIV/0!  | 0        | 0        |
| YGL024W           | 0        | 0        | 0        | 0        | 0        | 0        | #DIV/0!  | 0        | 0        |
| YEL010W           | 0        | 0        | 0        | 0        | 0        | 0        | #DIV/0!  | 0        | 0        |
| YEL034C- <i>f</i> | 0        | 0        | 0        | 0        | 0        | 0        | #DIV/0!  | 0        | 0        |
| YHR028W- <i>f</i> | 0        | 0        | 0        | 0        | 0        | 0        | #DIV/0!  | 0        | 0        |
| YGL086W           | 624.1455 | 585.3935 | 649.1533 | 690.3773 | 751.2758 | 922.6639 | 0.347136 | 706.0463 | 777.909  |
| YDL187C           | 0        | 0        | 0        | 0        | 0        | 0        | #DIV/0!  | 0        | 0        |
| YDR431W           | 0        | 0        | 0        | 0        | 0        | 0        | #DIV/0!  | 0        | 0        |
| YKR032W           | 0        | 0        | 0        | 0        | 0        | 0        | #DIV/0!  | 0        | 0        |
| YOR366W           | 0        | 0        | 0        | 0        | 0        | 0        | #DIV/0!  | 0        | 0        |
| YNL072W           | 703.6031 | 708.0098 | 807.2424 | 836.3326 | 746.6667 | 721.1064 | 0.054391 | 607.1098 | 700.6449 |
| YBR172C           | 1644.428 | 1825.399 | 2123.334 | 1888.464 | 2025.679 | 2206.37  | 0.129989 | 1979.853 | 2136.177 |
| YBR241C           | 1281.686 | 1542.591 | 1148.122 | 1215.1   | 1143.045 | 1007.788 | -0.239   | 1096.171 | 998.2872 |
| YNL061W           | 4182.466 | 5197.345 | 4518.384 | 5367.214 | 5417.943 | 5126.019 | 0.195143 | 5448.249 | 5475.215 |
| YDL032W           | 0        | 0        | 0        | 0        | 0        | 0        | #DIV/0!  | 0        | 0        |
| YIL068W- <i>f</i> | 0        | 0        | 0        | 0        | 0        | 0        | #DIV/0!  | 0        | 0        |
| YOL019W- <i>f</i> | 0        | 0        | 0        | 0        | 0        | 0        | #DIV/0!  | 0        | 0        |
| YPR002C- <i>f</i> | 6.90936  | 2.966521 | 7.904455 | 2.686293 | 4.609054 | 2.935304 | -0.79738 | 1.124277 | 3.512004 |

|                   |          |          |          |          |          |          |          |          |          |
|-------------------|----------|----------|----------|----------|----------|----------|----------|----------|----------|
| YAL026C- <i>f</i> | 0        | 0        | 1.976114 | 0        | 1.152263 | 0.978435 | 0.10866  | 2.248555 | 1.756002 |
| YCR037C           | 1700.854 | 1769.036 | 2092.704 | 1647.593 | 1865.515 | 2553.715 | 0.125183 | 1893.283 | 2324.069 |
| YLR416C           | 2.30312  | 1.977681 | 8.892511 | 3.581724 | 3.45679  | 1.956869 | -0.55036 | 7.869942 | 7.90201  |
| YCR034W           | 3179.457 | 3223.62  | 3082.737 | 3540.534 | 3436.05  | 2879.533 | 0.055248 | 3080.52  | 3065.98  |
| YMR028W           | 631.0548 | 641.7574 | 650.1414 | 666.2007 | 713.2511 | 543.0313 | -0.00035 | 586.8728 | 533.8247 |
| YBR253W           | 769.242  | 700.099  | 683.7353 | 706.4951 | 713.2511 | 534.2254 | -0.13999 | 802.7341 | 834.101  |
| YBR012C           | 131.2778 | 92.951   | 90.90123 | 74.32078 | 89.87655 | 85.12382 | -0.33794 | 138.2861 | 100.0921 |
| YKL024C           | 2731.5   | 2445.402 | 2657.873 | 2983.576 | 2735.473 | 2459.785 | 0.062003 | 3180.581 | 2616.443 |
| YOL101C           | 419.1678 | 518.1524 | 446.6017 | 440.5521 | 532.3457 | 339.5168 | -0.07654 | 315.922  | 310.8124 |
| YKL069W           | 1128.529 | 973.019  | 1076.982 | 883.7904 | 943.7038 | 918.7502 | -0.2109  | 1106.289 | 893.8051 |
| YNL329C           | 571.1737 | 675.378  | 561.2163 | 612.4748 | 613.0042 | 711.322  | 0.099466 | 665.5723 | 692.7428 |
| YGR279C           | 17537.11 | 18912.56 | 16936.28 | 18237.24 | 17288.56 | 16258.65 | -0.04394 | 18257.14 | 16793.53 |
| YIL089W           | 158.9153 | 127.5604 | 144.2563 | 142.3735 | 123.2922 | 136.0024 | -0.10079 | 187.7543 | 166.8202 |
| YHR123W           | 960.401  | 1131.233 | 1073.03  | 1150.629 | 1187.984 | 927.5561 | 0.045547 | 936.5231 | 886.7811 |
| YLR125W           | 55.27488 | 57.35275 | 55.33118 | 59.09845 | 63.37449 | 59.68452 | 0.117079 | 52.84104 | 86.92211 |
| YOL024W           | 18.42496 | 7.910723 | 11.85668 | 1.790862 | 14.97943 | 8.805912 | -0.57848 | 0        | 5.268006 |
| YAL056W           | 564.2644 | 628.9025 | 521.694  | 557.8535 | 485.1029 | 468.6702 | -0.18199 | 505.9249 | 563.6767 |
| YHR109W           | 286.7384 | 300.6075 | 256.8948 | 267.7339 | 226.9959 | 239.7165 | -0.201   | 227.1041 | 211.5983 |
| YDL227C           | 183.098  | 191.835  | 159.0771 | 175.5045 | 169.3827 | 135.024  | -0.1541  | 150.6532 | 137.8462 |
| YFR034C           | 1036.404 | 1621.698 | 1216.298 | 1618.044 | 1550.947 | 1326.757 | 0.214588 | 900.5463 | 1150.181 |
| YAL058W           | 538.9301 | 603.1927 | 618.5236 | 530.9906 | 548.4774 | 529.3332 | -0.13012 | 608.2341 | 563.6767 |
| YDR318W           | 352.3773 | 354.0049 | 387.3183 | 348.3227 | 303.0453 | 305.2716 | -0.19317 | 364.2659 | 403.8805 |
| YNL080C           | 1336.961 | 1471.395 | 1323.996 | 1574.168 | 1390.782 | 1128.135 | -0.01377 | 1209.723 | 1241.494 |
| YKL160W           | 2054.383 | 1630.598 | 1924.735 | 1995.02  | 2055.638 | 1825.759 | 0.067009 | 2584.714 | 2224.855 |
| YDR016C           | 454.8662 | 333.2392 | 358.6646 | 422.6434 | 404.4445 | 355.1718 | 0.043971 | 423.8526 | 348.5664 |
| YLR270W           | 1647.882 | 1650.375 | 1573.975 | 1379.859 | 1454.156 | 1370.787 | -0.21254 | 1752.749 | 1629.57  |
| YER165W           | 15661.22 | 15448.65 | 15589.56 | 16217.15 | 16155.89 | 16121.67 | 0.054422 | 15139.52 | 15338.68 |
| YJL179W           | 1032.949 | 953.2422 | 890.2392 | 1061.981 | 959.8355 | 902.1168 | 0.023631 | 1028.714 | 913.1211 |
| YLR078C           | 963.8557 | 973.019  | 884.3109 | 942.8889 | 1000.165 | 896.2462 | 0.009234 | 1016.347 | 800.737  |
| YIL112W           | 1867.83  | 1578.189 | 1866.439 | 1531.187 | 1443.786 | 1716.174 | -0.17944 | 1290.671 | 1568.11  |
| YPR059C           | 2.30312  | 0        | 0.988057 | 1.790862 | 1.152263 | 2.935304 | 0.836827 | 4.49711  | 7.024009 |
| YHR122W           | 809.5466 | 795.0277 | 768.7082 | 827.3783 | 724.7737 | 712.3005 | -0.06772 | 757.763  | 674.3048 |
| YER007C- <i>f</i> | 2156.872 | 1771.013 | 1875.332 | 2163.361 | 2120.165 | 1911.861 | 0.094342 | 2455.422 | 2259.975 |
| YHR056C           | 268.3135 | 265.0092 | 401.1511 | 309.8191 | 351.4404 | 676.0984 | 0.51716  | 371.0116 | 412.6605 |
| YKL026C           | 570.0222 | 636.8132 | 562.2043 | 488.0099 | 496.6256 | 364.9561 | -0.39044 | 636.3411 | 561.9207 |
| YGL074C           | 0        | 1.977681 | 0        | 0        | 3.45679  | 0        | 0.805623 | 2.248555 | 4.390005 |
| YKL157W           | 3838.149 | 3255.263 | 3524.399 | 3373.089 | 3538.601 | 3807.089 | 0.013654 | 3548.22  | 3282.846 |
| YNL078W           | 885.5496 | 1094.646 | 1044.376 | 1185.551 | 1101.564 | 1039.098 | 0.137149 | 1055.697 | 1115.061 |
| YJL042W           | 1631.76  | 1419.975 | 1630.294 | 1387.023 | 1473.745 | 1820.867 | -0.00012 | 1440.199 | 1828.876 |
| YHR131W- <i>f</i> | 2.30312  | 1.977681 | 6.916398 | 1.790862 | 1.152263 | 6.849043 | -0.19344 | 0        | 0.878001 |
| YBL021C           | 245.2823 | 239.2994 | 319.1424 | 275.7928 | 218.9301 | 204.4929 | -0.20096 | 231.6012 | 215.1103 |
| YOR221C           | 865.9731 | 1026.416 | 781.5529 | 899.9082 | 844.6091 | 847.3245 | -0.04499 | 817.3497 | 763.8609 |
| YDR509W           | 0        | 0.98884  | 0        | 2.686293 | 1.152263 | 0        | 1.956754 | 1.124277 | 0        |
| YDR545W           | 2.30312  | 0.98884  | 2.96417  | 0        | 0        | 0.978435 | -2.67672 | 5.621387 | 0.878001 |
| YDL077C           | 499.777  | 454.8666 | 552.3238 | 453.0881 | 521.9754 | 611.5217 | 0.074277 | 548.6474 | 600.5527 |
| YPR136C           | 0        | 0.98884  | 0        | 0        | 0        | 0.978435 | -0.01526 | 0        | 0        |
| YGR114C           | 1.15156  | 0        | 0        | 0.895431 | 0        | 0        | -0.36294 | 0        | 0        |
| YLR339C           | 1.15156  | 0        | 0        | 0.895431 | 0        | 0        | -0.36294 | 0        | 0        |
| YKL119C           | 663.2985 | 620.003  | 600.7386 | 638.4423 | 595.7202 | 497.0448 | -0.12205 | 716.1648 | 580.3587 |
| YLR393W           | 74.8514  | 85.04028 | 95.84151 | 118.1969 | 109.465  | 128.1749 | 0.476577 | 51.71676 | 129.9442 |
| YJL061W           | 1019.131 | 972.0301 | 1065.125 | 1052.131 | 1009.383 | 1282.728 | 0.1299   | 1096.171 | 1204.617 |
| YHR015W           | 34.5468  | 14.83261 | 19.76114 | 36.71267 | 55.30865 | 41.09426 | 0.945076 | 30.35549 | 22.82803 |
| YNL188W           | 567.719  | 542.8734 | 600.7386 | 607.1022 | 603.7861 | 708.3867 | 0.165443 | 656.578  | 625.1368 |
| YGL008C           | 54425.03 | 60949.16 | 63095.33 | 66024.61 | 73580.09 | 83316.65 | 0.320857 | 68311.1  | 77611.78 |

|           |          |          |          |          |          |          |          |          |                            |
|-----------|----------|----------|----------|----------|----------|----------|----------|----------|----------------------------|
| YPR170C   | 10.36404 | 7.910723 | 5.928341 | 7.163448 | 3.45679  | 3.913739 | -0.73576 | 7.869942 | 2.634003                   |
| YGL241W   | 634.5095 | 585.3935 | 731.1621 | 878.4178 | 750.1235 | 958.866  | 0.407245 | 817.3497 | 820.053                    |
| YGL194C   | 312.0727 | 395.5362 | 285.5484 | 369.813  | 334.1564 | 350.2796 | 0.086122 | 347.4017 | 293.2524                   |
| YOL013W-f | 5.7578   | 0.98884  | 1.976114 |          | 0        | 3.45679  | 0.978435 | -0.97578 | 0 3.512004                 |
| YGR213C   | 192.3105 | 161.181  | 151.1727 | 113.7197 | 150.9465 | 172.2045 | -0.20812 | 127.0434 | 186.1362                   |
| YOR255W   | 3.45468  | 2.966521 | 1.976114 | 3.581724 | 1.152263 |          | 0        | -0.82687 | 0 1.756002                 |
| YNL048W   | 917.7933 | 923.577  | 951.4987 | 951.8432 | 1010.535 | 1017.572 | 0.09354  | 969.1272 | 790.201                    |
| YAL040C   | 1003.009 | 1130.245 | 1049.316 | 1188.237 | 1101.564 | 1109.545 | 0.095065 | 1016.347 | 1232.714                   |
| YAL008W   | 689.7844 | 675.378  | 910.9884 | 744.9986 | 801.9754 | 724.0417 | -0.00326 | 758.8873 | 673.4268                   |
| YGR057C   | 443.3506 | 521.1189 | 512.8015 | 507.7094 | 496.6256 | 446.1662 | -0.02638 | 465.4509 | 523.2886                   |
| YIL054W   | 16.12184 | 3.955362 | 5.928341 | 4.477155 | 6.913581 | 2.935304 | -0.86018 | 13.49133 | 10.53601                   |
| YIL030W-f |          | 0        | 0.98884  |          | 0        | 0.895431 |          | 0        | -0.14316 0 1.756002        |
| YIL021W   | 758.878  | 760.4183 | 805.2663 | 894.5356 | 733.9918 | 808.1871 | 0.067978 | 739.7746 | 725.2289                   |
| YBL038W   | 1545.393 | 1341.856 | 1339.805 | 1472.984 | 1221.399 | 1144.769 | -0.13887 | 1385.11  | 1260.81                    |
| YMR075C-f | 3.45468  |          | 0        | 1.976114 | 0.895431 | 1.152263 | 0.978435 | -0.84369 | 4.49711 0.878001           |
| YBR014C   | 1409.509 | 1304.281 | 1383.28  | 1359.264 | 1327.408 | 1149.661 | -0.09486 | 1704.405 | 1435.532                   |
| YMR033W   | 1634.064 | 1417.008 | 1588.795 | 1564.318 | 1681.152 | 1685.843 | 0.087888 | 1480.673 | 1452.214                   |
| YDR014W   | 154.309  | 125.5827 | 147.2205 | 187.1451 | 178.6008 | 244.6087 | 0.515032 | 163.0202 | 189.6482                   |
| YFR046C   | 382.3179 | 354.0049 | 460.4345 | 360.8587 | 357.2017 | 362.0208 | -0.14799 | 322.6676 | 321.3484                   |
| YMR115W   | 749.6655 | 903.8002 | 754.8754 | 653.6646 | 736.2964 | 721.1064 | -0.19007 | 764.5087 | 847.271                    |
| YEL054C   | 4869.947 | 4184.773 | 4158.731 | 4786.079 | 4803.786 | 4071.267 | 0.04807  | 5059.249 | 4307.473                   |
| YOR270C   | 7127.004 | 7354.995 | 8328.331 | 8466.3   | 8696.132 | 10679.61 | 0.287578 | 8473.679 | 9011.803                   |
| YGR285C   | 13452.52 | 13894.2  | 12540.42 | 13894.4  | 13068.97 | 12992.63 | 0.002489 | 14770.76 | 13424.64                   |
| YMR073C   | 723.1796 | 780.1951 | 707.4487 | 748.5803 | 659.0947 | 649.6807 | -0.10379 | 671.1937 | 658.5008                   |
| YBR184W   | 70.24516 | 69.21883 | 72.12815 | 83.27509 | 87.57202 | 76.31791 | 0.224189 | 38.22543 | 78.1421                    |
| YDR342C   | 2969.873 | 2646.137 | 2410.859 | 1541.932 | 1614.321 | 1698.563 | -0.72542 | 2502.642 | 2099.301                   |
| YBR097W   | 444.5021 | 396.525  | 402.1391 | 306.2374 | 361.8107 | 557.7078 | -0.02035 | 490.185  | 405.6365                   |
| YGR014W   | 6852.933 | 6336.489 | 8184.075 | 7655.04  | 8939.26  | 10452.62 | 0.339641 | 7124.546 | 9050.435                   |
| YGR277C   | 788.8186 | 781.1839 | 760.8038 | 664.4098 | 768.5597 | 663.3787 | -0.15295 | 889.3035 | 770.0069                   |
| YNL077W   | 323.5883 | 422.2349 | 356.6885 | 298.1785 | 289.2181 | 252.4362 | -0.39262 | 260.8324 | 293.2524                   |
| YBR189W   | 55438.4  | 43762.12 | 49384.07 | 53866.44 | 51221.57 | 47806.32 | 0.04125  | 59016.7  | 48570.14                   |
| YNR024W   | 245.2823 | 347.083  | 298.3932 | 362.6496 | 297.284  | 359.0855 | 0.194075 | 224.8555 | 332.7624                   |
| YJL169W   | 19.57652 | 6.921883 | 12.84474 | 9.849741 | 6.913581 | 12.71965 | -0.41623 | 7.869942 | 10.53601                   |
| YDL094C   | 11.5156  | 10.87724 | 1.976114 | 1.790862 | 9.218108 | 4.892174 | -0.61591 | 6.745665 | 10.53601                   |
| YER107W-f | 11.5156  | 27.68753 | 21.73725 | 35.81724 | 18.43622 | 33.26678 | 0.522218 | 19.11272 | 34.24204                   |
| YPL018W   | 131.2778 | 146.3484 | 147.2205 | 130.7329 | 112.9218 | 106.6494 | -0.27833 | 119.1734 | 137.8462                   |
| YKL195W   | 3599.776 | 3496.54  | 3334.692 | 2945.073 | 2808.066 | 2748.423 | -0.29508 | 2826.434 | 3131.83                    |
| YLR154C-c |          | 0        | 0        | 2.96417  |          | 0        | 2.304527 |          | 0 -0.36316 0 0.878001      |
| YNL217W   | 1110.104 | 1056.082 | 1085.874 | 1188.237 | 1198.354 | 1079.213 | 0.091836 | 1155.757 | 917.5111                   |
| YML043C   | 818.7591 | 937.4207 | 1042.4   | 1052.131 | 1075.062 | 1119.329 | 0.2142   | 933.1503 | 999.1652                   |
| YLR319C   | 781.9092 | 593.3043 | 717.3293 | 748.5803 | 810.0412 | 855.1519 | 0.206033 | 771.2544 | 777.031                    |
| YPL071C   | 347.7711 | 387.6254 | 370.5213 | 346.5318 | 330.6996 | 265.1558 | -0.23085 | 383.3786 | 300.2764                   |
| YNL203C   | 20.72808 | 11.86609 | 10.86863 | 8.058879 | 13.82716 | 17.61182 | -0.13801 | 13.49133 | 7.024009                   |
| YFL023W   | 940.8245 | 1091.68  | 937.6659 | 1187.342 | 1221.399 | 1268.051 | 0.307902 | 1068.064 | 1263.444                   |
| YHR053C   | 2.30312  |          | 0        | 0        | 0        | 0        | 0        | #NUM!    | 5.621387 0                 |
| YLR394W   | 278.6775 | 286.7637 | 280.6081 | 274.8973 | 293.8272 | 331.6894 | 0.089846 | 338.4075 | 336.2744                   |
| YGL109W   | 36.84992 | 19.77681 | 24.70142 | 25.9675  | 14.97943 | 30.33148 | -0.19029 | 19.11272 | 19.31602                   |
| YHR035W   | 112.8529 | 132.5046 | 168.9577 | 128.9421 | 175.144  | 194.7085 | 0.267717 | 151.7775 | 123.7982                   |
| YBL071C-f | 12.66716 | 0.98884  | 1.976114 | 6.268017 | 3.45679  | 1.956869 | -0.42027 | 1.124277 | 1.756002                   |
| YOL161C   |          | 0        | 1.977681 | 3.952227 |          | 0        | 2.304527 |          | 0 -1.36354 0 1.756002      |
| YNL283C   | 2848.959 | 2568.019 | 2956.266 | 2546.606 | 2673.251 | 3037.061 | -0.02018 | 2663.413 | 2650.685                   |
| YGL239C   |          | 0        | 1.977681 |          | 0        | 1.790862 | 1.152263 | 1.956869 | 1.308971 2.248555 2.634003 |
| YML037C   | 73.69984 | 127.5604 | 123.5071 | 119.0923 | 81.81071 | 141.873  | 0.07786  | 73.07804 | 136.0902                   |
| YPL229W   | 468.6849 | 420.2572 | 326.0588 | 353.6953 | 328.3951 | 317.0128 | -0.28225 | 327.1647 | 366.1264                   |

|                   |          |          |          |          |          |          |          |          |          |
|-------------------|----------|----------|----------|----------|----------|----------|----------|----------|----------|
| YNL022C           | 1381.872 | 1624.665 | 1378.339 | 1548.2   | 1615.473 | 1663.339 | 0.138595 | 1504.283 | 1528.6   |
| YNL277W           | 710.5125 | 1138.155 | 904.072  | 794.2473 | 624.5268 | 600.7589 | -0.44685 | 701.5491 | 705.0349 |
| YNL328C           | 90.97324 | 96.90636 | 72.12815 | 69.84362 | 63.37449 | 87.08069 | -0.23909 | 37.10116 | 86.92211 |
| YEL023C           | 156.6122 | 178.9801 | 151.1727 | 144.1644 | 111.7696 | 189.8163 | -0.12699 | 100.0607 | 147.5042 |
| YNL273W           | 587.2956 | 474.6434 | 579.0013 | 551.5855 | 482.7984 | 712.3005 | 0.090096 | 622.8497 | 596.1627 |
| YMR326C           | 2.30312  | 0        | 0.988057 | 0        | 2.304527 | 0        | -0.51413 | 0        | 0        |
| YER165C- <i>f</i> | 0        | 10.87724 | 8.892511 | 4.477155 | 4.609054 | 10.76278 | 0.005771 | 0        | 21.95003 |
| YGR143W           | 496.3223 | 600.2261 | 579.0013 | 541.7358 | 687.9013 | 799.3812 | 0.276147 | 482.315  | 551.3847 |
| YIR021W- <i>f</i> | 0        | 2.966521 | 0        | 11.6406  | 8.065844 | 2.935304 | 2.932142 | 2.248555 | 6.146008 |
| YHR061C           | 309.7696 | 344.1165 | 319.1424 | 292.8059 | 255.8025 | 281.7892 | -0.22868 | 257.4595 | 323.9824 |
| YDL127W           | 1029.495 | 1060.037 | 871.4661 | 955.4249 | 1090.041 | 780.7909 | -0.06719 | 765.633  | 883.2691 |
| YER035W           | 688.6328 | 809.8603 | 648.1653 | 473.683  | 406.749  | 315.056  | -0.84449 | 534.0318 | 477.6326 |
| YPR106W           | 264.8588 | 300.6075 | 248.0023 | 250.7207 | 300.7408 | 236.7812 | -0.04545 | 308.052  | 219.5003 |
| YNL295W           | 515.8989 | 562.6502 | 436.7211 | 409.212  | 406.749  | 422.6838 | -0.29081 | 456.4567 | 567.1887 |
| YGL020C           | 1573.031 | 1433.819 | 1532.476 | 1706.692 | 1701.893 | 1550.819 | 0.127689 | 1763.991 | 1657.666 |
| YER148W- <i>f</i> | 9.21248  | 8.899564 | 2.96417  | 5.372586 | 2.304527 | 7.827478 | -0.44292 | 11.24277 | 6.146008 |
| YBL049W           | 180.7949 | 268.9646 | 200.5755 | 188.9359 | 138.2716 | 139.9162 | -0.47738 | 148.4046 | 163.3082 |
| YBR119W           | 504.3833 | 501.3421 | 454.5061 | 478.1602 | 481.6461 | 356.1502 | -0.15009 | 424.9769 | 408.2705 |
| YDR053W           | 0        | 0        | 1.976114 | 0.895431 | 2.304527 | 0.978435 | 1.080282 | 0        | 2.634003 |
| YIR031C           | 154.309  | 207.6565 | 214.4083 | 140.5827 | 169.3827 | 162.4202 | -0.28704 | 159.6474 | 135.2122 |
| YIR017W- <i>f</i> | 0        | 2.966521 | 3.952227 | 1.790862 | 4.609054 | 1.956869 | 0.272437 | 0        | 0        |
| YER184C           | 127.8232 | 157.2256 | 153.1488 | 98.49741 | 107.1605 | 148.7221 | -0.30628 | 103.4335 | 94.82412 |
| YIR035C           | 1672.065 | 1453.595 | 1462.324 | 1671.77  | 1516.379 | 1389.377 | -0.00329 | 1599.847 | 1495.236 |
| YNL021W           | 622.9939 | 734.7084 | 778.5888 | 671.5733 | 706.3375 | 799.3812 | 0.027427 | 591.37   | 643.5748 |
| YPL210C           | 3007.875 | 3054.528 | 3318.883 | 3429.501 | 3509.795 | 3717.073 | 0.183858 | 2902.884 | 3095.832 |
| YLR399C           | 1544.242 | 1698.828 | 1815.06  | 1644.011 | 1784.856 | 2109.505 | 0.130858 | 1570.616 | 1871.02  |
| YHR084W           | 1719.279 | 1618.732 | 1680.685 | 1818.62  | 1864.362 | 1943.171 | 0.164837 | 1569.491 | 1992.184 |
| YLL020C           | 2.30312  | 1.977681 | 4.940284 | 3.581724 | 1.152263 | 0.978435 | -0.69083 | 3.372832 | 0.878001 |
| YHR153C           | 55.27488 | 42.52014 | 35.57005 | 38.50353 | 38.02469 | 43.05113 | -0.15741 | 37.10116 | 19.31602 |
| YKL192C           | 5139.412 | 4840.374 | 4571.739 | 4478.946 | 4677.037 | 4076.159 | -0.13712 | 5486.474 | 4374.201 |
| YER073W           | 1342.719 | 1673.118 | 1600.652 | 1482.834 | 1364.28  | 1343.391 | -0.13967 | 1291.795 | 1388.12  |
| YGL065C           | 982.2806 | 891.9341 | 913.9526 | 1003.778 | 1046.255 | 1043.011 | 0.149711 | 992.737  | 964.0452 |
| YOL094C           | 978.8259 | 843.4809 | 825.0274 | 951.8432 | 985.1853 | 833.6264 | 0.065687 | 816.2254 | 772.6409 |
| YER137C           | 110.5498 | 94.92868 | 116.5907 | 102.9746 | 102.5514 | 63.59826 | -0.2591  | 164.1445 | 120.2861 |
| YKL027W           | 1749.22  | 2196.215 | 1815.06  | 2016.511 | 2027.984 | 1738.678 | 0.005669 | 1852.809 | 1780.586 |
| YML028W           | 53780.15 | 45797.16 | 49284.27 | 59919.56 | 56554.24 | 50587.03 | 0.166402 | 54296.98 | 46189.88 |
| YIL039W           | 2252.451 | 2230.824 | 2383.193 | 2408.709 | 2586.831 | 2525.34  | 0.131333 | 2471.162 | 2192.369 |
| YOL141W           | 126.6716 | 182.9355 | 197.6114 | 188.0405 | 192.428  | 338.5384 | 0.503398 | 177.6358 | 282.7163 |
| YPL148C           | 253.3432 | 239.2994 | 178.8383 | 198.7857 | 149.7943 | 146.7652 | -0.43891 | 263.0809 | 189.6482 |
| YLR358C           | 17.2734  | 16.81029 | 13.8328  | 30.44465 | 12.6749  | 24.46087 | 0.496083 | 12.36705 | 14.92602 |
| YDR090C           | 385.7726 | 523.0966 | 535.5268 | 341.1592 | 441.3169 | 365.9346 | -0.33083 | 418.2312 | 390.7105 |
| YBR074W           | 1334.658 | 1297.359 | 1324.984 | 1407.618 | 1326.255 | 1435.364 | 0.075376 | 1509.905 | 1353.878 |
| YPR158W           | 886.7012 | 1153.977 | 837.8722 | 753.0575 | 517.3663 | 420.7269 | -0.76734 | 701.5491 | 628.6488 |
| YCL010C           | 344.3164 | 531.0073 | 523.6701 | 443.2384 | 519.6708 | 582.1687 | 0.14329  | 456.4567 | 513.6306 |
| YLR127C           | 399.5913 | 475.6322 | 448.5778 | 440.5521 | 426.3375 | 420.7269 | -0.03998 | 458.7052 | 505.7286 |
| YKR057W           | 16664.22 | 13060.6  | 14527.4  | 15668.25 | 15436.87 | 14606.07 | 0.046798 | 17519.62 | 14748.66 |
| YLR138W           | 976.5228 | 1155.954 | 1001.89  | 1149.733 | 903.3746 | 795.4674 | -0.13793 | 1051.199 | 1204.617 |
| YFR006W           | 2966.418 | 3018.93  | 3018.514 | 3142.963 | 3043.128 | 2917.692 | 0.015922 | 3100.757 | 2586.591 |
| YOR099W           | 3749.479 | 3407.544 | 3545.148 | 3707.084 | 3477.531 | 3434.306 | -0.01127 | 3568.457 | 3424.204 |
| YHR063C           | 1092.83  | 1190.564 | 1134.289 | 1159.583 | 1311.276 | 1020.507 | 0.030773 | 1047.827 | 1055.357 |
| YKL169C           | 0        | 2.966521 | 1.976114 | 0.895431 | 0        | 2.935304 | -0.36766 | 0        | 0.878001 |
| YML091C           | 1594.911 | 1567.312 | 1750.837 | 1698.633 | 1864.362 | 2050.799 | 0.192355 | 1286.173 | 1804.292 |
| YDL133W           | 824.5169 | 793.05   | 871.4661 | 761.1164 | 730.535  | 738.7182 | -0.1583  | 794.8642 | 661.1348 |
| YOL045W           | 530.8691 | 489.476  | 547.3835 | 488.0099 | 649.8766 | 700.5593 | 0.229811 | 539.6532 | 621.6248 |



|                   |          |          |          |          |          |          |          |          |          |
|-------------------|----------|----------|----------|----------|----------|----------|----------|----------|----------|
| YOR139C           | 0        | 3.955362 | 3.952227 | 0.895431 | 1.152263 | 1.956869 | -0.98159 | 3.372832 | 3.512004 |
| YJR140C           | 477.8974 | 486.5095 | 514.7776 | 498.7551 | 508.1482 | 822.8636 | 0.306858 | 531.7832 | 633.9168 |
| YMR126C           | 371.9539 | 476.6211 | 349.7721 | 388.6171 | 342.2223 | 309.1854 | -0.20443 | 355.2717 | 370.5165 |
| YKR098C           | 234.9182 | 294.6744 | 269.7395 | 230.1258 | 214.321  | 257.3283 | -0.18779 | 240.5954 | 245.8403 |
| YBR200W- <i>f</i> | 2.30312  | 1.977681 | 1.976114 | 3.581724 | 3.45679  | 0.978435 | 0.357602 | 3.372832 | 0        |
| YOR001W           | 1923.105 | 2118.096 | 2127.286 | 2423.932 | 2411.687 | 2801.259 | 0.308066 | 2362.107 | 2318.801 |
| YMR129W           | 1829.829 | 1668.174 | 1817.037 | 1791.757 | 1955.391 | 2611.442 | 0.258627 | 1961.864 | 2127.397 |
| YGL138C           | 0        | 1.977681 | 0        | 0        | 0        | 0        | #NUM!    | 0        | 0        |
| YBR211C           | 314.3759 | 319.3955 | 330.011  | 250.7207 | 258.107  | 248.5224 | -0.34775 | 247.341  | 237.0603 |
| YDR493W           | 601.1143 | 547.8176 | 600.7386 | 464.7287 | 517.3663 | 386.4817 | -0.35441 | 634.0925 | 459.1946 |
| YMR290W- <i>f</i> | 1.15156  | 5.933043 | 5.928341 | 3.581724 | 1.152263 | 0        | -1.45882 | 1.124277 | 0        |
| YOR274W           | 825.6685 | 1011.584 | 917.9048 | 929.4574 | 935.6379 | 899.1815 | 0.004768 | 884.8064 | 764.7389 |
| YBR128C           | 120.9138 | 164.1475 | 156.113  | 98.49741 | 114.0741 | 113.4984 | -0.43617 | 137.1619 | 107.1161 |
| YHR139C- <i>f</i> | 9.21248  | 12.85493 | 7.904455 | 8.95431  | 11.52263 | 5.870608 | -0.18594 | 5.621387 | 7.024009 |
| YOL086C           | 160784.3 | 146329.6 | 148185.8 | 157816.1 | 151743.9 | 135790.1 | -0.03188 | 180334.1 | 154853   |
| YLR427W           | 1115.862 | 966.0971 | 1150.098 | 1087.053 | 1192.593 | 1303.275 | 0.148684 | 1015.223 | 1340.708 |
| YMR089C           | 1497.028 | 1589.067 | 1706.374 | 1455.075 | 1553.251 | 1498.962 | -0.08851 | 1606.593 | 1542.648 |
| YOR015W           | 470.988  | 349.0607 | 389.2944 | 352.7998 | 414.8148 | 323.8619 | -0.14794 | 381.1301 | 358.2244 |
| YDR266C           | 1607.578 | 1595     | 1767.634 | 1816.83  | 1867.819 | 1924.581 | 0.174496 | 1703.28  | 1982.526 |
| YPR194C           | 1799.888 | 2070.632 | 2007.731 | 1787.28  | 1850.535 | 1678.016 | -0.14509 | 1751.624 | 1791.122 |
| YLR129W           | 2392.942 | 2653.059 | 2736.917 | 2853.739 | 3273.581 | 4011.582 | 0.381518 | 2531.873 | 2828.919 |
| YOR376W- <i>f</i> | 19.57652 | 32.63173 | 40.51033 | 23.28121 | 23.04527 | 27.39617 | -0.33075 | 28.10694 | 55.31407 |
| YJL202C           | 8.06092  | 5.933043 | 12.84474 | 4.477155 | 13.82716 | 8.805912 | 0.014522 | 8.99422  | 9.658012 |
| YBL104C           | 660.9954 | 753.4964 | 752.8993 | 670.6778 | 841.1523 | 868.85   | 0.135414 | 607.1098 | 707.6689 |
| YDR315C           | 168.1278 | 167.114  | 130.4235 | 121.7786 | 130.2058 | 129.1534 | -0.28898 | 158.5231 | 138.7242 |
| YOR121C           | 61.03268 | 54.38622 | 44.46256 | 50.14414 | 76.04939 | 45.98643 | 0.106915 | 60.71098 | 44.77805 |
| YML109W           | 741.6046 | 486.5095 | 615.5594 | 576.6576 | 674.0741 | 824.8205 | 0.170912 | 652.0809 | 718.2049 |
| YDR211W           | 2520.765 | 2318.831 | 2392.086 | 2560.933 | 2741.235 | 2998.902 | 0.198966 | 2588.087 | 2804.335 |
| YMR075W           | 327.043  | 390.592  | 507.8612 | 408.3165 | 516.214  | 669.2493 | 0.379086 | 418.2312 | 518.8986 |
| YGR229C           | 2369.91  | 2576.918 | 2758.655 | 2840.307 | 2867.984 | 3155.452 | 0.202031 | 2028.197 | 2621.711 |
| YDR291W           | 571.1737 | 635.8244 | 594.8102 | 561.4353 | 663.7038 | 696.6455 | 0.093001 | 645.3353 | 641.8188 |
| YOR081C           | 742.7562 | 835.5702 | 829.9677 | 843.496  | 886.0906 | 822.8636 | 0.083871 | 744.2717 | 830.589  |
| YNL057W           | 0        | 0.98884  | 0.988057 | 0        | 0        | 0        | #NUM!    | 0        | 0        |
| YJL010C           | 1575.334 | 1931.205 | 1800.24  | 2186.643 | 2124.774 | 2170.168 | 0.28851  | 1888.786 | 1855.216 |
| YDR445C           | 0        | 0        | 1.976114 | 0        | 0        | 0        | #NUM!    | 0        | 0        |
| YFL015W- <i>f</i> | 0        | 1.977681 | 0        | 0        | 0        | 0        | #NUM!    | 0        | 0        |
| YJL223C           | 0        | 1.977681 | 0        | 0        | 0        | 0        | #NUM!    | 0        | 0        |
| YMR324C           | 0        | 0        | 1.976114 | 0        | 0        | 0        | #NUM!    | 0        | 0        |
| YOR146W           | 0        | 0        | 1.976114 | 0        | 0        | 0        | #NUM!    | 0        | 0        |
| YMR001C- <i>f</i> | 17.2734  | 23.73217 | 8.892511 | 20.59491 | 26.50206 | 19.56869 | 0.41796  | 19.11272 | 29.85204 |
| YER086W           | 3691.901 | 4241.137 | 3783.27  | 4076.897 | 4079.013 | 3439.198 | -0.015   | 3387.448 | 3690.239 |
| YLR137W           | 325.8915 | 346.0942 | 337.9154 | 281.1653 | 304.1976 | 293.5304 | -0.20045 | 317.0462 | 244.0843 |
| YDR365C           | 2117.719 | 2437.492 | 2498.796 | 2952.236 | 2995.885 | 3046.846 | 0.350675 | 2622.939 | 3128.318 |
| YOR321W           | 446.8053 | 472.6657 | 527.6223 | 524.7226 | 496.6256 | 517.592  | 0.088779 | 535.1561 | 489.0466 |
| YLR448W           | 20006.05 | 17386.78 | 18594.24 | 20561.78 | 20269.47 | 18319.23 | 0.079296 | 21421.98 | 18606.6  |
| YJR141W           | 494.0192 | 511.2305 | 644.2131 | 521.1409 | 511.605  | 596.8452 | -0.01749 | 511.5463 | 454.8046 |
| YHR111W           | 663.2985 | 847.4363 | 801.3141 | 847.0778 | 719.0124 | 744.5888 | -0.00086 | 738.6503 | 810.395  |
| YPR092W           | 6.90936  | 5.933043 | 9.880568 | 9.849741 | 12.6749  | 6.849043 | 0.370373 | 14.61561 | 14.04802 |
| YLR230W           | 179.6434 | 269.9534 | 267.7634 | 260.5704 | 238.5185 | 268.0911 | 0.096868 | 279.9451 | 328.3724 |
| YDL138W           | 413.41   | 631.869  | 535.5268 | 461.147  | 546.1729 | 456.929  | -0.1105  | 413.7341 | 563.6767 |
| YGL198W           | 393.8335 | 365.871  | 352.7363 | 353.6953 | 373.3334 | 304.2932 | -0.10923 | 472.1965 | 377.5405 |
| YPR067W           | 634.5095 | 545.8399 | 575.0491 | 537.2586 | 526.5844 | 525.4194 | -0.14344 | 735.2775 | 621.6248 |
| YIL022W           | 2665.861 | 3404.578 | 2717.156 | 3063.27  | 2979.753 | 2707.329 | -0.00613 | 3101.882 | 3303.04  |
| YDR113C           | 869.4278 | 734.7084 | 886.287  | 855.1366 | 780.0824 | 804.2733 | -0.02981 | 753.2659 | 818.297  |

|                   |          |          |          |          |          |          |          |          |          |
|-------------------|----------|----------|----------|----------|----------|----------|----------|----------|----------|
| YGR206W           | 381.1663 | 332.2504 | 403.1272 | 373.3947 | 327.2428 | 278.8539 | -0.18894 | 384.5029 | 313.4464 |
| YOR042W           | 2744.167 | 2514.621 | 2773.476 | 2698.829 | 2491.194 | 2265.076 | -0.10758 | 2707.26  | 2713.023 |
| YER179W           | 29.94056 | 63.28579 | 43.4745  | 44.77155 | 50.69959 | 19.56869 | -0.24889 | 67.45665 | 44.77805 |
| YPL274W           | 4398.959 | 7283.799 | 4819.741 | 5555.254 | 5308.478 | 4676.918 | -0.08664 | 4042.902 | 3878.131 |
| YAL032C           | 644.8736 | 681.3111 | 719.3054 | 824.692  | 604.9383 | 626.1982 | 0.007273 | 754.3902 | 746.3009 |
| YPL259C           | 684.0266 | 768.329  | 644.2131 | 777.2341 | 617.6132 | 665.3356 | -0.02526 | 691.4306 | 753.3249 |
| YER131W           | 30135.17 | 25078.97 | 27230.85 | 30422.27 | 30140.91 | 27767    | 0.099475 | 35605.87 | 32335.02 |
| YML106W           | 6859.843 | 6598.532 | 6259.34  | 7167.925 | 6875.556 | 6097.605 | 0.030649 | 7442.717 | 6256.636 |
| YIL085C           | 1735.401 | 1843.199 | 1697.482 | 1696.842 | 1966.914 | 1817.932 | 0.055153 | 1986.598 | 1680.494 |
| YNL318C           | 0        | 1.977681 | 0        | 3.581724 | 0        | 3.913739 | 1.922208 | 0        | 1.756002 |
| YER175W- <i>f</i> | 17.2734  | 32.63173 | 27.66559 | 34.02638 | 8.065844 | 29.35304 | -0.11867 | 10.1185  | 21.95003 |
| YKL058W           | 1270.171 | 1089.702 | 1121.444 | 1210.623 | 1162.634 | 983.3269 | -0.05264 | 1249.072 | 1026.383 |
| YER087C- <i>f</i> | 2449.368 | 2060.743 | 2292.292 | 2269.022 | 2577.613 | 2088.958 | 0.027975 | 2499.269 | 2167.785 |
| YDL030W           | 727.7859 | 737.675  | 672.8667 | 607.9977 | 708.642  | 807.2086 | -0.0098  | 688.0578 | 670.7928 |
| YDR430C           | 1062.89  | 1033.338 | 1152.074 | 997.5102 | 1034.733 | 1065.515 | -0.06846 | 1089.425 | 1248.518 |
| YJL077W- <i>f</i> | 10.36404 | 14.83261 | 12.84474 | 1.790862 | 19.58848 | 5.870608 | -0.48132 | 10.1185  | 13.17002 |
| YBR126W- <i>f</i> | 4.60624  | 2.966521 | 1.976114 | 2.686293 | 3.45679  | 1.956869 | -0.23742 | 4.49711  | 3.512004 |
| YOR063W           | 85714.06 | 83343.43 | 83161.78 | 91346.5  | 86969.39 | 88476.92 | 0.081041 | 104020.4 | 89385.78 |
| YDR410C           | 879.7918 | 682.2999 | 704.4845 | 829.1691 | 818.1071 | 681.969  | 0.039348 | 735.2775 | 689.2308 |
| YMR203W           | 5201.596 | 5494.986 | 5280.176 | 5291.102 | 5522.799 | 5136.782 | -0.00236 | 5998.02  | 5844.853 |
| YNR027W           | 1107.801 | 1143.1   | 1096.743 | 1234.799 | 1122.305 | 981.37   | -0.00396 | 1106.289 | 981.6052 |
| YIL047C- <i>f</i> | 1.15156  | 3.955362 | 0.988057 | 0.895431 | 6.913581 | 9.784347 | 1.529338 | 1.124277 | 3.512004 |
| YHR162W           | 9700.741 | 8217.264 | 8573.369 | 9446.797 | 9170.865 | 8430.194 | 0.029992 | 11549.7  | 9182.135 |
| YER089C           | 2105.052 | 2224.891 | 1903.986 | 2261.859 | 2004.938 | 1760.204 | -0.0487  | 2003.462 | 1747.222 |
| YGR276C           | 1058.284 | 1057.07  | 1011.77  | 970.6472 | 1116.543 | 1114.437 | 0.033969 | 1145.639 | 1062.381 |
| YBL047C           | 4892.978 | 3933.607 | 4991.663 | 4378.658 | 4716.214 | 5611.323 | 0.089849 | 4954.691 | 5325.955 |
| YMR223W           | 385.7726 | 400.4804 | 434.745  | 415.48   | 440.1646 | 458.8859 | 0.106487 | 487.9364 | 427.5865 |
| YCR014C           | 333.9524 | 363.8933 | 410.0436 | 324.146  | 338.7655 | 417.7916 | -0.03584 | 346.2775 | 308.1784 |
| YML054C- <i>f</i> | 41.45616 | 41.5313  | 26.67753 | 37.6081  | 16.13169 | 18.59026 | -0.60044 | 32.60405 | 10.53601 |
| YOR017W           | 573.4768 | 661.5342 | 646.1892 | 564.1215 | 642.963  | 727.9554 | 0.04071  | 582.3757 | 621.6248 |
| YJL007C           | 1.15156  | 0.98884  | 5.928341 | 0        | 0        | 5.870608 | -0.45883 | 0        | 0        |
| YOR228C           | 346.6195 | 465.7438 | 450.5539 | 354.5907 | 343.3745 | 344.409  | -0.27689 | 455.3324 | 442.5125 |
| YMR260C           | 9883.839 | 8030.373 | 8723.554 | 9542.608 | 9612.182 | 8736.444 | 0.066339 | 11409.17 | 10039.94 |
| YOL132W           | 62.18424 | 42.52014 | 61.25952 | 28.65379 | 29.95885 | 28.37461 | -0.93199 | 56.21387 | 44.77805 |
| YJL016W           | 441.0475 | 499.3644 | 459.4464 | 549.7946 | 456.2963 | 520.5273 | 0.125059 | 477.8179 | 403.0025 |
| YDL140C           | 4568.238 | 4475.492 | 4534.193 | 4373.285 | 5150.618 | 5292.353 | 0.125918 | 4733.208 | 5178.45  |
| YGL147C           | 39855.49 | 30176.44 | 37088.69 | 38903.79 | 36871.28 | 36376.25 | 0.06621  | 48219.14 | 40693.59 |
| YDR301W           | 900.5199 | 853.3693 | 861.5856 | 815.7377 | 897.6132 | 1109.545 | 0.110103 | 854.4509 | 855.173  |
| YDR535C           | 20.72808 | 24.72101 | 22.72531 | 24.17664 | 17.28395 | 27.39617 | 0.014368 | 16.86416 | 14.04802 |
| YDR229W           | 900.5199 | 771.2955 | 841.8244 | 937.5163 | 775.4733 | 771.0066 | -0.01712 | 807.2312 | 976.3372 |
| YBL069W           | 298.254  | 313.4624 | 272.7037 | 311.61   | 312.2634 | 279.8323 | 0.031121 | 292.3121 | 279.2043 |
| YJL072C           | 441.0475 | 415.313  | 456.4823 | 407.4211 | 435.5556 | 402.1367 | -0.07642 | 395.7457 | 457.4386 |
| YOR332W           | 2342.273 | 1768.047 | 1701.434 | 1986.961 | 2007.243 | 1497.005 | -0.08185 | 2734.243 | 1904.384 |
| YNL178W           | 60456.9  | 48054.68 | 53722.63 | 57167.9  | 54999.84 | 54193.54 | 0.036242 | 62917.94 | 51713.39 |
| YHR177W           | 135.8841 | 152.2814 | 201.5636 | 158.4913 | 178.6008 | 203.5144 | 0.142595 | 156.2746 | 201.0622 |
| YNL199C           | 1316.233 | 1470.406 | 1276.569 | 1433.585 | 1491.029 | 1453.954 | 0.10784  | 1334.517 | 1186.179 |
| YCL005W- <i>f</i> | 101.3373 | 78.11839 | 74.10426 | 88.64767 | 87.57202 | 87.08069 | 0.054383 | 91.06648 | 79.8981  |
| YNL216W           | 1575.334 | 1501.06  | 1688.589 | 1567.004 | 1645.432 | 2310.084 | 0.212856 | 1425.584 | 1463.628 |
| YDR003W           | 662.147  | 677.3557 | 649.1533 | 614.2657 | 557.6955 | 516.6135 | -0.23599 | 634.0925 | 560.1647 |
| YGR137W           | 147.3997 | 92.951   | 104.734  | 111.9289 | 99.09466 | 68.49043 | -0.30403 | 143.9075 | 122.9202 |
| YGL112C           | 1249.443 | 1251.872 | 1334.865 | 1331.506 | 1404.609 | 1440.256 | 0.12258  | 1242.327 | 1237.104 |
| YLR154W- <i>f</i> | 1.15156  | 0        | 0.988057 | 0        | 0        | 0        | #NUM!    | 0        | 1.756002 |
| YLR048W           | 32561.51 | 29915.39 | 32910.2  | 34172.33 | 34422.72 | 33378.32 | 0.096327 | 39536.34 | 34697.72 |
| YOR120W           | 1148.105 | 1247.917 | 1320.044 | 1168.537 | 1116.543 | 996.0465 | -0.17958 | 1156.882 | 1299.442 |

|         |          |          |          |          |          |          |          |          |          |
|---------|----------|----------|----------|----------|----------|----------|----------|----------|----------|
| YDR332W | 381.1663 | 428.1679 | 411.0316 | 461.147  | 386.0083 | 424.6407 | 0.059553 | 308.052  | 362.6144 |
| YNR057C | 134.7325 | 148.3261 | 183.7786 | 189.8314 | 149.7943 | 155.5711 | 0.085082 | 143.9075 | 151.0162 |
| YDR246W | 41.45616 | 35.59826 | 51.37895 | 42.98069 | 43.78601 | 37.18052 | -0.05129 | 40.47399 | 40.38805 |
| YNR021W | 4559.026 | 3987.993 | 3894.92  | 4454.769 | 4486.914 | 3865.796 | 0.041775 | 4501.607 | 4029.147 |
| YIL128W | 794.5764 | 929.51   | 922.8451 | 1038.7   | 1072.757 | 1275.879 | 0.35583  | 966.8786 | 1121.207 |
| YKL198C | 1169.985 | 1687.951 | 1130.337 | 1124.661 | 1106.173 | 868.85   | -0.36364 | 915.1619 | 969.3132 |
| YOR345C | 3.45468  | 0.98884  | 4.940284 | 0.895431 | 3.45679  | 4.892174 | -0.02159 | 1.124277 | 1.756002 |
| YLR244C | 4441.567 | 4313.322 | 4267.417 | 5361.841 | 4846.42  | 4797.265 | 0.204509 | 4536.46  | 4314.497 |
| YLR061W | 219.9479 | 410.3688 | 275.6679 | 302.6557 | 245.4321 | 217.2125 | -0.24346 | 212.4884 | 280.9603 |
| YKL208W | 298.254  | 410.3688 | 303.3334 | 326.8323 | 273.0864 | 264.1774 | -0.22788 | 345.1532 | 378.4185 |
| YNL108C | 320.1337 | 341.1499 | 296.417  | 245.3481 | 382.5515 | 262.2205 | -0.10557 | 355.2717 | 359.1024 |
| YGR269W | 16.12184 | 26.69869 | 22.72531 | 13.43147 | 9.218108 | 33.26678 | -0.22923 | 13.49133 | 11.41401 |
| YLR077W | 719.725  | 979.9409 | 660.022  | 779.025  | 792.7573 | 780.7909 | -0.00436 | 764.5087 | 672.5488 |
| YBR233W | 499.777  | 431.1344 | 463.3987 | 445.9247 | 473.5803 | 417.7916 | -0.06023 | 376.633  | 388.9545 |
| YOR023C | 880.9434 | 1016.528 | 980.1524 | 918.7122 | 919.5062 | 1006.809 | -0.01644 | 930.9018 | 1067.649 |
| YAL056C | 0        | 0        | 0        | 0.895431 | 4.609054 | 1.956869 | #DIV/0!  | 2.248555 | 0.878001 |
| YHL010C | 327.043  | 295.6633 | 303.3334 | 291.0151 | 246.5844 | 322.8835 | -0.10593 | 228.2283 | 309.0564 |
| YLR044C | 211779.9 | 219709.5 | 202810.5 | 223897.2 | 219295.3 | 199840.4 | 0.019727 | 237329.4 | 220703.1 |
| YGL212W | 172.734  | 228.4221 | 196.6233 | 154.9096 | 192.428  | 259.2852 | 0.021186 | 170.8902 | 191.4042 |
| YBR258C | 130.1263 | 154.2591 | 146.2324 | 147.7461 | 116.3786 | 126.2181 | -0.14167 | 181.0087 | 152.7722 |
| YJL074C | 679.4204 | 535.9515 | 705.4726 | 725.2991 | 709.7943 | 1034.205 | 0.362361 | 661.0752 | 842.003  |
| YDR383C | 507.8379 | 389.6031 | 424.8644 | 455.7744 | 429.7943 | 370.8268 | -0.07376 | 545.2746 | 445.1465 |
| YDR118W | 230.312  | 238.3105 | 280.6081 | 248.0344 | 285.7613 | 266.1342 | 0.094464 | 161.896  | 233.5483 |
| YOL003C | 412.2585 | 432.1233 | 414.9839 | 411.8983 | 445.926  | 444.2094 | 0.04807  | 530.659  | 443.3905 |
| YBR027C | 8.06092  | 13.84377 | 3.952227 | 3.581724 | 5.761317 | 2.935304 | -1.07443 | 3.372832 | 1.756002 |
| YJR128W | 4.60624  | 0        | 0        | 0        | 4.609054 | 1.956869 | 0.511408 | 0        | 1.756002 |
| YKL056C | 40325.33 | 33526.63 | 37564.93 | 40873.74 | 39360.17 | 36927.1  | 0.072525 | 51270.43 | 41079.04 |
| YNL017C | 2.30312  | 7.910723 | 1.976114 | 4.477155 | 2.304527 | 2.935304 | -0.32711 | 0        | 6.146008 |
| YOL002C | 1662.853 | 2126.007 | 1552.237 | 1960.994 | 1849.383 | 1620.288 | 0.023993 | 1716.772 | 1479.432 |
| YGL130W | 1159.621 | 1198.475 | 1185.668 | 1150.629 | 1151.111 | 1130.092 | -0.0463  | 1087.176 | 981.6052 |
| YMR056C | 120.9138 | 229.411  | 165.9935 | 119.9878 | 97.94239 | 75.33947 | -0.81603 | 110.1792 | 107.9941 |
| YDR024W | 24.18276 | 14.83261 | 16.79697 | 19.69948 | 16.13169 | 14.67652 | -0.14408 | 22.48555 | 10.53601 |
| YLL057C | 64.48736 | 90.97332 | 97.81763 | 95.81112 | 86.41976 | 45.98643 | -0.15032 | 136.0376 | 84.2881  |
| YPL031C | 2424.034 | 2099.308 | 2278.459 | 2303.944 | 2021.07  | 1898.163 | -0.12827 | 2314.887 | 1777.952 |
| YDL118W | 3.45468  | 8.899564 | 1.976114 | 7.163448 | 5.761317 | 7.827478 | 0.534193 | 4.49711  | 2.634003 |
| YJR084W | 764.6358 | 688.2329 | 709.4248 | 735.1489 | 762.7984 | 658.4866 | -0.00391 | 749.8931 | 684.8408 |
| YPR152C | 370.8023 | 413.3353 | 334.9513 | 419.9572 | 412.5103 | 420.7269 | 0.163286 | 372.1358 | 420.5625 |
| YER093C | 621.8424 | 625.936  | 692.6278 | 696.6453 | 706.3375 | 891.354  | 0.241719 | 643.0867 | 748.9349 |
| YGL190C | 1606.426 | 1633.564 | 1679.697 | 1532.082 | 1582.058 | 1682.908 | -0.03642 | 1617.835 | 1792     |
| YNL051W | 476.7458 | 398.5027 | 496.9926 | 511.2911 | 407.9013 | 407.0288 | -0.04921 | 492.4335 | 434.6105 |
| YHR199C | 1552.303 | 1979.659 | 1669.816 | 1694.156 | 1464.527 | 1233.806 | -0.24397 | 1422.211 | 1447.824 |
| YNL116W | 804.9404 | 808.8715 | 852.693  | 717.2403 | 786.9959 | 755.3516 | -0.12641 | 666.6965 | 634.7948 |
| YML105C | 2145.356 | 2171.494 | 1848.654 | 2163.361 | 2053.334 | 2082.109 | 0.030859 | 2434.061 | 2288.071 |
| YNR051C | 2395.245 | 2144.795 | 2687.515 | 2625.404 | 2401.317 | 2483.267 | 0.055303 | 2177.725 | 2791.165 |
| YPL038W | 467.5333 | 446.9559 | 432.7689 | 456.6698 | 474.7325 | 375.7189 | -0.04363 | 558.7659 | 475.8766 |
| YIL125W | 2258.209 | 2111.174 | 2385.169 | 2101.577 | 2091.358 | 2331.61  | -0.04998 | 2456.546 | 2382.895 |
| YPL013C | 2052.08  | 1464.473 | 1910.902 | 1861.601 | 2047.572 | 1837.5   | 0.082451 | 2173.228 | 1719.126 |
| YLR284C | 279.8291 | 270.9423 | 273.6917 | 236.3938 | 225.8436 | 216.2341 | -0.28117 | 266.4538 | 257.2543 |
| YDR248C | 685.1782 | 672.4115 | 659.0339 | 665.3053 | 713.2511 | 784.7046 | 0.101266 | 636.3411 | 587.3827 |
| YPL094C | 4600.482 | 4745.445 | 4521.348 | 4952.629 | 4705.844 | 4414.697 | 0.021263 | 4949.069 | 4495.365 |
| YKR066C | 4112.221 | 5293.263 | 4250.62  | 4536.254 | 4190.782 | 3473.443 | -0.16261 | 4199.176 | 3879.009 |
| YNR054C | 1456.723 | 1571.267 | 1588.795 | 1815.039 | 1909.301 | 1591.913 | 0.203521 | 1609.965 | 1559.33  |
| YDR353W | 8993.683 | 8211.331 | 8582.262 | 9273.979 | 9063.704 | 8502.598 | 0.05774  | 8703.032 | 8119.754 |
| YLR066W | 1386.478 | 1250.883 | 1341.781 | 1183.76  | 1221.399 | 1236.741 | -0.12777 | 1550.379 | 1216.909 |

|                   |          |          |          |          |          |          |          |          |          |
|-------------------|----------|----------|----------|----------|----------|----------|----------|----------|----------|
| YNR032W           | 559.6581 | 661.5342 | 614.5713 | 511.2911 | 548.4774 | 447.1447 | -0.28478 | 513.7948 | 525.0446 |
| YGR235C           | 1431.389 | 1348.778 | 1407.981 | 1318.074 | 1235.226 | 1265.116 | -0.13334 | 1588.604 | 1361.78  |
| YBR085W           | 1117.013 | 1181.664 | 1011.77  | 1196.296 | 1272.099 | 903.0952 | 0.02636  | 1138.893 | 982.4832 |
| YMR120C           | 4644.241 | 6207.94  | 5168.525 | 5318.86  | 5771.688 | 5532.07  | 0.05321  | 4747.824 | 4642.87  |
| YGL069C           | 0        | 0        | 0        | 0        | 0        | 0        | #DIV/0!  | 1.124277 | 0        |
| YLR162W           | 0        | 0        | 0        | 0        | 0        | 0        | #DIV/0!  | 1.124277 | 0        |
| YNL235C           | 0        | 0        | 0        | 0        | 0        | 0        | #DIV/0!  | 1.124277 | 0        |
| YNL319W           | 0        | 0        | 0        | 0        | 0        | 0        | #DIV/0!  | 1.124277 | 0        |
| YPL038W- <i>f</i> | 1.15156  | 8.899564 | 1.976114 | 5.372586 | 3.45679  | 1.956869 | -0.15711 | 4.49711  | 4.390005 |
| YOL080C           | 946.5823 | 797.0054 | 667.9264 | 929.4574 | 999.0124 | 908.9658 | 0.234648 | 953.3873 | 821.809  |
| YIRO26C           | 1718.127 | 1746.292 | 1739.968 | 2084.563 | 2027.984 | 1759.226 | 0.174068 | 2272.165 | 2029.938 |
| YNL046W           | 711.664  | 802.9384 | 659.0339 | 657.2464 | 633.7449 | 516.6135 | -0.26603 | 623.974  | 518.0206 |
| YBL065W           | 0        | 0        | 0        | 0        | 0        | 0        | #DIV/0!  | 0        | 0.878001 |
| YHR180W- <i>f</i> | 0        | 0        | 0        | 0        | 0        | 0        | #DIV/0!  | 0        | 0.878001 |
| YIL172C           | 0        | 0        | 0        | 0        | 0        | 0        | #DIV/0!  | 0        | 0.878001 |
| YOL079W           | 0        | 0        | 0        | 0        | 0        | 0        | #DIV/0!  | 0        | 0.878001 |
| YOL162W           | 0        | 0        | 0        | 0        | 0        | 0        | #DIV/0!  | 0        | 0.878001 |
| YPL281C           | 0        | 0        | 0        | 0        | 0        | 0        | #DIV/0!  | 0        | 0.878001 |
| YKL053C- <i>f</i> | 982.2806 | 1017.517 | 937.6659 | 868.5681 | 920.6585 | 785.6831 | -0.19005 | 1197.356 | 906.9751 |
| YKR088C           | 1023.737 | 852.3805 | 902.0959 | 955.4249 | 982.8807 | 764.1575 | -0.03988 | 973.6243 | 719.0829 |
| YDR525W           | 18.42496 | 7.910723 | 5.928341 | 11.6406  | 13.82716 | 8.805912 | 0.087175 | 12.36705 | 2.634003 |
| YLR092W           | 490.5645 | 494.4202 | 459.4464 | 478.1602 | 433.2511 | 434.425  | -0.102   | 332.7861 | 367.0044 |
| YFR056C           | 2.30312  | 5.933043 | 8.892511 | 6.268017 | 6.913581 | 7.827478 | 0.294599 | 7.869942 | 9.658012 |
| YGL213C           | 423.7741 | 514.197  | 451.542  | 442.3429 | 456.2963 | 472.584  | -0.01912 | 557.6416 | 440.7565 |
| YGR173W           | 1666.307 | 1736.404 | 1788.383 | 2089.041 | 1994.568 | 1942.193 | 0.215115 | 1887.662 | 1714.736 |
| YLR285W           | 1767.645 | 1521.825 | 1779.49  | 1760.417 | 1769.877 | 1721.067 | 0.051001 | 1706.653 | 1478.554 |
| YDR025W           | 34976.33 | 27684.57 | 31054.63 | 34394.4  | 33749.8  | 30358.87 | 0.071881 | 36189.37 | 31529.02 |
| YPL173W           | 1287.444 | 1149.033 | 1364.506 | 1130.929 | 1171.852 | 1119.329 | -0.15149 | 1299.665 | 1194.959 |
| YLR020C           | 1168.833 | 1298.347 | 1273.605 | 1283.153 | 1330.864 | 1453.954 | 0.120968 | 1241.202 | 1360.024 |
| YOR077W           | 135.8841 | 154.2591 | 113.6265 | 129.8375 | 109.465  | 121.3259 | -0.16302 | 101.185  | 172.0882 |
| YBR284W           | 86.367   | 74.16303 | 80.0326  | 63.5756  | 89.87655 | 65.55513 | -0.13543 | 65.20809 | 101.8481 |
| YBR114W           | 707.0578 | 778.2174 | 766.7321 | 796.0382 | 579.5885 | 895.2678 | 0.012049 | 568.8844 | 677.8168 |
| YLR016C           | 696.6938 | 708.9986 | 543.4313 | 534.5723 | 618.7655 | 531.29   | -0.2104  | 650.9567 | 613.7228 |
| YDL185C- <i>f</i> | 0        | 0        | 0        | 0.895431 | 0        | 2.935304 | #DIV/0!  | 1.124277 | 0        |
| YKR089C           | 1827.526 | 1740.359 | 1582.867 | 1433.585 | 1489.877 | 1505.811 | -0.21771 | 1495.289 | 1668.202 |
| YBR232C           | 0        | 0        | 0        | 0        | 0        | 0.978435 | #DIV/0!  | 0        | 0        |
| YKL106C- <i>f</i> | 0        | 0        | 1.976114 | 2.686293 | 3.45679  | 2.935304 | 2.19977  | 1.124277 | 1.756002 |
| YIL073C           | 142.7934 | 155.2479 | 169.9458 | 145.0598 | 101.3992 | 158.5064 | -0.20867 | 130.4162 | 102.7261 |
| YBR135W           | 1585.698 | 1506.004 | 1641.162 | 1668.188 | 1686.914 | 1438.299 | 0.018336 | 1572.864 | 1690.152 |
| YDL068W           | 0        | 0        | 0        | 1.790862 | 0        | 0        | #DIV/0!  | 2.248555 | 0.878001 |
| YBR021W           | 697.8453 | 940.3873 | 772.6604 | 664.4098 | 859.5885 | 636.961  | -0.1579  | 612.7312 | 689.2308 |
| YGL041C- <i>f</i> | 2.30312  | 3.955362 | 4.940284 | 7.163448 | 4.609054 | 0.978435 | 0.187264 | 5.621387 | 0.878001 |
| YDR158W           | 6102.116 | 5647.268 | 6037.027 | 5771.948 | 5731.358 | 5533.048 | -0.06216 | 5958.671 | 5501.555 |
| YHR021C           | 13178.45 | 12127.14 | 11674.88 | 11824.17 | 13260.25 | 13021.99 | 0.04327  | 17222.81 | 12349.09 |
| YGR126W           | 46.0624  | 72.18535 | 64.22369 | 51.935   | 58.76544 | 91.97286 | 0.151485 | 46.09538 | 60.58207 |
| YDL028C           | 685.1782 | 652.6347 | 776.6127 | 686.7956 | 791.605  | 883.5265 | 0.159699 | 692.5549 | 900.8291 |
| YJL068C           | 1244.836 | 986.8628 | 1169.859 | 1077.204 | 1066.996 | 918.7502 | -0.15127 | 1295.168 | 1151.059 |
| YDR086C           | 5790.043 | 4712.814 | 5342.423 | 5450.489 | 5701.4   | 5440.097 | 0.066433 | 5982.28  | 5403.219 |
| YLR316C           | 367.3476 | 325.3285 | 308.2737 | 329.5186 | 307.6543 | 239.7165 | -0.1909  | 279.9451 | 268.6683 |
| YLR283W           | 270.6166 | 294.6744 | 240.0978 | 233.7075 | 223.5391 | 241.6734 | -0.20456 | 306.9278 | 263.4003 |
| YLR269C           | 17.2734  | 10.87724 | 10.86863 | 11.6406  | 14.97943 | 15.65496 | 0.115617 | 14.61561 | 14.92602 |
| YDR215C           | 6.90936  | 3.955362 | 2.96417  | 7.163448 | 0        | 3.913739 | -0.32009 | 7.869942 | 14.04802 |
| YEL037C           | 5779.679 | 5742.196 | 5362.184 | 6100.572 | 5831.605 | 5667.094 | 0.059854 | 5927.191 | 5757.053 |
| YNL105W           | 0        | 0        | 0        | 0.895431 | 0        | 0        | #DIV/0!  | 0        | 0        |

|                   |          |          |          |          |          |          |          |          |          |
|-------------------|----------|----------|----------|----------|----------|----------|----------|----------|----------|
| YKL149C           | 260.2525 | 362.9044 | 284.5604 | 366.2313 | 313.4157 | 311.1422 | 0.126335 | 317.0462 | 281.8383 |
| YGL019W           | 2131.537 | 2238.735 | 2021.564 | 2224.251 | 2060.247 | 2014.597 | -0.02109 | 2385.717 | 2282.803 |
| YML116W- <i>f</i> | 48.36552 | 41.5313  | 38.53422 | 41.18983 | 44.93828 | 35.22365 | -0.0818  | 48.34393 | 31.60804 |
| YPL156C           | 426.0772 | 421.246  | 303.3334 | 333.1003 | 266.1729 | 250.4793 | -0.43734 | 424.9769 | 388.0765 |
| YJL063C           | 2506.946 | 2502.755 | 2605.506 | 2517.057 | 2352.922 | 2159.405 | -0.11548 | 2879.275 | 2389.041 |
| YGL234W           | 5857.985 | 8177.71  | 6927.266 | 6925.264 | 7108.313 | 7137.681 | 0.014264 | 5450.497 | 6499.842 |
| YBR194W           | 344.3164 | 305.5517 | 312.226  | 346.5318 | 315.7202 | 276.897  | -0.03482 | 347.4017 | 291.4964 |
| YGR242W           | 2.30312  | 0.98884  | 6.916398 | 1.790862 | 2.304527 | 3.913739 | -0.35003 | 0        | 3.512004 |
| YEL066W           | 639.1158 | 547.8176 | 472.2912 | 537.2586 | 578.4363 | 442.2525 | -0.09086 | 568.8844 | 561.0427 |
| YHR071W           | 3751.782 | 3516.317 | 3242.803 | 3067.747 | 3048.889 | 2376.618 | -0.3075  | 3458.278 | 2828.919 |
| YOL073C           | 785.3639 | 737.675  | 708.4367 | 731.5671 | 737.4486 | 561.6215 | -0.13607 | 745.396  | 654.1108 |
| YBR261C           | 1773.402 | 1823.422 | 1966.233 | 2075.609 | 1991.111 | 1634.964 | 0.03551  | 2218.199 | 1866.63  |
| YDR491C           | 12.66716 | 29.66521 | 18.77308 | 20.59491 | 29.95885 | 22.504   | 0.257736 | 21.36127 | 16.68202 |
| YBR182C- <i>f</i> | 16.12184 | 39.55362 | 27.66559 | 21.49034 | 19.58848 | 17.61182 | -0.5059  | 20.23699 | 13.17002 |
| YHL008C           | 336.2555 | 237.3217 | 231.2053 | 247.139  | 299.5885 | 238.7381 | -0.03505 | 332.7861 | 278.3263 |
| YDR400W           | 1309.324 | 1354.711 | 1342.769 | 1366.428 | 1419.589 | 1384.485 | 0.057769 | 1258.066 | 1144.913 |
| YGR267C           | 2498.885 | 2345.53  | 2567.96  | 2532.279 | 2506.173 | 2591.874 | 0.041809 | 2767.971 | 2597.127 |
| YPL119C- <i>f</i> | 36.84992 | 40.54246 | 31.61782 | 22.38578 | 24.19753 | 30.33148 | -0.50313 | 43.84682 | 35.99804 |
| YER028C           | 84.06388 | 65.26347 | 68.17592 | 73.42534 | 78.35392 | 67.512   | 0.011811 | 74.20231 | 56.19207 |
| YDR505C           | 760.0296 | 703.0655 | 890.2392 | 732.4626 | 872.2634 | 1225.979 | 0.266455 | 751.0174 | 1010.579 |
| YDR396W           | 11.5156  | 5.933043 | 11.85668 | 12.53603 | 9.218108 | 2.935304 | -0.24727 | 14.61561 | 15.80402 |
| YMR013C           | 207.2808 | 206.6677 | 165.9935 | 263.2567 | 192.428  | 193.7301 | 0.163232 | 182.133  | 162.4302 |
| YLR003C           | 1522.362 | 1489.194 | 1586.819 | 1749.672 | 1839.012 | 1751.398 | 0.215738 | 1552.627 | 1680.494 |
| YOL042W           | 436.4412 | 423.2237 | 461.4225 | 374.2902 | 425.1852 | 379.6327 | -0.16403 | 415.9827 | 444.2685 |
| YKL113C           | 1586.85  | 1583.134 | 1666.852 | 1918.013 | 1719.177 | 1680.951 | 0.136859 | 1553.751 | 1450.458 |
| YIL046W           | 1378.417 | 1953.949 | 1637.21  | 1563.423 | 1533.663 | 1551.797 | -0.09624 | 1281.676 | 1295.052 |
| YDR169C- <i>f</i> | 4.60624  | 0.98884  | 3.952227 | 1.790862 | 3.45679  | 8.805912 | 0.55777  | 7.869942 | 8.780011 |
| YDR167W           | 1626.003 | 1431.841 | 1555.201 | 1560.736 | 1472.593 | 1515.595 | -0.02019 | 1793.223 | 1638.35  |
| YHL007C           | 2440.156 | 2287.188 | 2718.144 | 2635.254 | 2829.959 | 3556.61  | 0.277053 | 2097.902 | 2548.837 |
| YLR281C           | 3.45468  | 11.86609 | 5.928341 | 4.477155 | 6.913581 | 3.913739 | -0.47345 | 7.869942 | 11.41401 |
| YER002W           | 2898.476 | 2897.302 | 2811.022 | 3349.807 | 3374.98  | 2987.161 | 0.174284 | 3058.035 | 3014.178 |
| YOL025W           | 193.4621 | 231.3887 | 232.1934 | 207.74   | 176.2963 | 214.2772 | -0.13509 | 161.896  | 244.0843 |
| YLR226W           | 442.199  | 493.4314 | 490.0762 | 474.5784 | 500.0823 | 538.1391 | 0.085544 | 456.4567 | 499.5826 |
| YPR190C           | 1950.743 | 2168.527 | 2071.955 | 2327.225 | 2456.626 | 2475.44  | 0.229604 | 2237.312 | 2244.171 |
| YIL052C           | 24920.91 | 19507.84 | 21707.61 | 23462.08 | 23204.28 | 22118.5  | 0.056647 | 27547.05 | 22474.19 |
| YLR384C           | 1977.228 | 1995.48  | 2209.295 | 2453.481 | 2314.897 | 2735.703 | 0.279601 | 1919.142 | 2315.289 |
| YER078C           | 793.4248 | 814.8045 | 827.9916 | 762.0118 | 775.4733 | 747.5241 | -0.09244 | 833.0896 | 799.859  |
| YDL213C           | 2462.035 | 2190.282 | 2531.402 | 2903.883 | 2717.037 | 2347.265 | 0.14952  | 2920.873 | 2766.581 |
| YNR059W           | 367.3476 | 472.6657 | 463.3987 | 400.2577 | 367.572  | 375.7189 | -0.18878 | 403.6156 | 423.1965 |
| YBR176W           | 564.2644 | 645.7128 | 564.1804 | 555.1672 | 667.1605 | 521.5057 | -0.02487 | 563.263  | 535.5807 |
| YMR114C           | 272.9197 | 262.0427 | 242.0739 | 221.1715 | 248.8889 | 226.9969 | -0.1567  | 342.9046 | 243.2063 |
| YJR030C           | 415.7131 | 354.0049 | 448.5778 | 393.9897 | 545.0206 | 602.7158 | 0.339682 | 441.841  | 517.1426 |
| YNL114C           | 2.30312  | 0        | 0        | 0        | 1.152263 | 0.978435 | -0.11226 | 0        | 0        |
| YFL038C           | 9152.598 | 7787.118 | 8189.015 | 8401.829 | 8385.021 | 7784.427 | -0.03237 | 8593.977 | 8140.826 |
| YPR159C- <i>f</i> | 5.7578   | 9.888404 | 1.976114 | 1.790862 | 9.218108 | 0        | -0.67872 | 11.24277 | 0.878001 |
| YPR091C           | 1178.046 | 1023.45  | 1245.94  | 1218.682 | 1133.827 | 1348.283 | 0.102311 | 1249.072 | 1280.126 |
| YDL075W           | 28822.39 | 22147.06 | 25409.86 | 26308.66 | 27381.24 | 25875.68 | 0.058963 | 31351.6  | 26640.31 |
| YCR108C           | 0        | 1.977681 | 0        | 1.790862 | 0        | 1.956869 | 0.922208 | 6.745665 | 0        |
| YDR160W           | 522.8082 | 599.2373 | 562.2043 | 476.3693 | 595.7202 | 740.6751 | 0.106085 | 526.1619 | 589.1387 |
| YMR213W           | 558.5066 | 510.2417 | 497.9806 | 556.9581 | 599.177  | 558.6862 | 0.130303 | 468.8237 | 718.2049 |
| YML050W           | 234.9182 | 223.4779 | 180.8144 | 173.7136 | 197.0371 | 166.3339 | -0.25114 | 170.8902 | 241.4503 |
| YEL014C           | 23.0312  | 37.57594 | 26.67753 | 22.38578 | 24.19753 | 22.504   | -0.33731 | 17.98844 | 19.31602 |
| YBL014C           | 742.7562 | 773.2732 | 757.8396 | 923.1894 | 987.4898 | 1096.825 | 0.403418 | 852.2023 | 1070.283 |
| YPL174C           | 544.6879 | 451.9001 | 567.1446 | 529.1997 | 534.6502 | 609.5648 | 0.097801 | 451.9595 | 561.9207 |

|           |          |          |          |          |          |          |          |          |          |
|-----------|----------|----------|----------|----------|----------|----------|----------|----------|----------|
| YGL146C   | 123.2169 | 106.7948 | 97.81763 | 69.84362 | 80.65844 | 88.05912 | -0.45859 | 87.69364 | 54.43607 |
| YOL129W   | 2092.384 | 1984.603 | 2135.191 | 1826.679 | 2102.881 | 1761.182 | -0.12648 | 2179.974 | 1913.164 |
| YDL050C   | 9.21248  | 5.933043 | 8.892511 | 11.6406  | 4.609054 | 2.935304 | -0.32534 | 11.24277 | 3.512004 |
| YFRO45W   | 441.0475 | 417.2907 | 379.4138 | 325.0415 | 342.2223 | 335.6031 | -0.30359 | 371.0116 | 361.7364 |
| YER014W   | 447.9568 | 638.7909 | 614.5713 | 569.4941 | 564.6091 | 523.4626 | -0.03759 | 428.3497 | 512.7526 |
| YPL266W   | 2200.631 | 2199.181 | 2358.492 | 2752.555 | 2729.712 | 2617.313 | 0.261186 | 2640.928 | 2339.873 |
| YOR156C   | 294.7993 | 213.5895 | 296.417  | 249.8253 | 248.8889 | 329.7325 | 0.041768 | 281.0694 | 278.3263 |
| YCR002C   | 1925.408 | 1982.625 | 1760.717 | 1846.379 | 1916.214 | 1731.829 | -0.04506 | 2092.28  | 1854.338 |
| YPR101W   | 636.8126 | 548.8064 | 466.3628 | 448.6109 | 473.5803 | 418.7701 | -0.30093 | 543.026  | 540.8487 |
| YOR112W   | 867.1246 | 887.9787 | 937.6659 | 847.0778 | 979.4239 | 973.5425 | 0.056359 | 804.9827 | 806.883  |
| YMR217W   | 12328.6  | 12277.44 | 12336.88 | 13926.64 | 13571.36 | 13850.72 | 0.162545 | 14629.1  | 13842.56 |
| YIL104C   | 666.7532 | 786.1281 | 658.0458 | 742.3123 | 842.3046 | 902.1168 | 0.236375 | 847.7052 | 767.3729 |
| YIL018W   | 68848.31 | 59657.73 | 62909.58 | 67687.42 | 64839.02 | 61414.39 | 0.018908 | 73101.65 | 61588.26 |
| YAL022C   | 766.9389 | 866.2242 | 744.9948 | 807.6788 | 781.2346 | 670.2278 | -0.07407 | 919.659  | 786.689  |
| YPL076W   | 266.0103 | 312.4736 | 282.5843 | 265.943  | 266.1729 | 251.4577 | -0.13606 | 256.3353 | 214.2323 |
| YKL151C   | 2861.626 | 2864.671 | 2774.464 | 2479.449 | 2413.992 | 2306.171 | -0.23967 | 3008.567 | 2569.909 |
| YOR258W   | 206.1292 | 192.8239 | 172.9099 | 146.8507 | 133.6626 | 165.3555 | -0.35905 | 167.5173 | 155.4062 |
| YFR051C   | 4708.729 | 4801.809 | 4554.942 | 4490.587 | 4749.63  | 4392.193 | -0.04512 | 4605.041 | 4634.09  |
| YAL037W   | 69.0936  | 72.18535 | 66.19981 | 62.68017 | 62.22223 | 63.59826 | -0.13839 | 79.8237  | 52.68006 |
| YGR231C   | 2700.408 | 2617.461 | 2434.572 | 2713.156 | 2484.28  | 2129.074 | -0.08152 | 2984.957 | 2677.025 |
| YLR458W   | 2.30312  | 1.977681 | 0.988057 | 0.895431 | 0        | 1.956869 | -0.88536 | 1.124277 | 0        |
| YOR278W   | 446.8053 | 461.7885 | 465.3748 | 445.9247 | 410.2058 | 408.9857 | -0.11908 | 436.2197 | 357.3464 |
| YOR175C   | 1616.79  | 1783.868 | 1703.41  | 1667.293 | 1776.79  | 1826.738 | 0.04638  | 1638.072 | 1716.492 |
| YGL233W   | 908.5808 | 716.9093 | 938.654  | 817.5285 | 898.7655 | 1139.876 | 0.155605 | 962.3815 | 1023.749 |
| YOR105W   | 8.06092  | 18.78797 | 16.79697 | 16.11776 | 12.6749  | 14.67652 | -0.00585 | 16.86416 | 14.92602 |
| YOR118W   | 1348.477 | 1322.08  | 1440.587 | 1601.926 | 1527.901 | 1604.633 | 0.20366  | 1588.604 | 1602.352 |
| YMR304C-f | 44.91084 | 30.65405 | 26.67753 | 73.42534 | 53.00412 | 40.11582 | 0.703921 | 56.21387 | 51.80206 |
| YMR255W   | 1429.086 | 1217.263 | 1319.056 | 1184.655 | 1144.198 | 1078.235 | -0.21893 | 1443.572 | 1288.906 |
| YER006W   | 3848.513 | 4152.141 | 4151.815 | 5074.408 | 4798.025 | 4862.821 | 0.278022 | 4316.101 | 4430.393 |
| YLL066C   | 5.7578   | 4.944202 | 3.952227 | 5.372586 | 3.45679  | 6.849043 | 0.097463 | 1.124277 | 1.756002 |
| YDR095C   | 2.30312  | 1.977681 | 0        | 0        | 0        | 0.978435 | -2.12933 | 4.49711  | 0.878001 |
| YGL123W   | 51907.72 | 42566.61 | 46630.35 | 50441.42 | 47858.11 | 44334.83 | 0.015556 | 56318.43 | 46167.05 |
| YLR146W-f | 138.1872 | 143.3819 | 92.87734 | 128.9421 | 156.7078 | 112.52   | 0.088625 | 116.9249 | 97.45812 |
| YJR118C   | 773.8483 | 769.3179 | 928.7734 | 921.3985 | 858.4363 | 790.5752 | 0.056355 | 912.9133 | 815.663  |
| YJL206C   | 193.4621 | 205.6788 | 193.6591 | 196.9948 | 218.9301 | 193.7301 | 0.040447 | 175.3873 | 186.1362 |
| YGR181W   | 1032.949 | 821.7264 | 894.1914 | 924.9802 | 799.6708 | 845.3676 | -0.09706 | 1263.688 | 1027.261 |
| YPL237W   | 3372.919 | 2957.622 | 3146.961 | 3473.377 | 3484.445 | 3313.958 | 0.116107 | 3951.835 | 3350.452 |
| YML116W   | 295.9509 | 282.8084 | 252.9425 | 276.6882 | 248.8889 | 260.2636 | -0.08183 | 258.5838 | 244.0843 |
| YCL001W-f | 28.789   | 45.48666 | 18.77308 | 39.39897 | 21.89301 | 39.13739 | 0.110123 | 41.59827 | 24.58403 |
| YOL027C   | 2002.563 | 2134.906 | 2136.179 | 2067.55  | 2051.029 | 2046.885 | -0.02509 | 2111.393 | 2183.589 |
| YBL063W   | 373.1054 | 315.4401 | 352.7363 | 342.0547 | 413.6626 | 377.6758 | 0.122288 | 237.2225 | 396.8565 |
| YDR191W   | 198.0683 | 199.7458 | 242.0739 | 177.2953 | 216.6255 | 207.4282 | -0.08962 | 166.3931 | 172.0882 |
| YDR231C   | 456.0177 | 402.4581 | 484.1478 | 436.9703 | 342.2223 | 350.2796 | -0.24941 | 458.7052 | 459.1946 |
| YMR247W-f | 13.81872 | 14.83261 | 13.8328  | 32.23552 | 8.065844 | 2.935304 | 0.025332 | 8.99422  | 8.780011 |
| YGL167C   | 2369.91  | 2226.869 | 2564.007 | 2383.637 | 2389.794 | 3124.142 | 0.141291 | 2625.188 | 2687.561 |
| YOR244W   | 482.5036 | 576.494  | 544.4193 | 462.9378 | 479.3416 | 457.9074 | -0.19553 | 559.8902 | 604.9427 |
| YER091C-f | 0        | 12.85493 | 3.952227 | 5.372586 | 0        | 0.978435 | -1.40401 | 2.248555 | 0.878001 |
| YGL231C   | 1837.89  | 1755.192 | 1913.866 | 1915.327 | 1824.033 | 1885.444 | 0.03055  | 1937.13  | 1752.49  |
| YBR227C   | 725.4828 | 824.6929 | 723.2576 | 757.5346 | 752.428  | 787.6399 | 0.015257 | 824.0954 | 803.371  |
| YNR011C   | 621.8424 | 573.5275 | 579.9894 | 597.2525 | 625.6791 | 785.6831 | 0.17809  | 639.7139 | 643.5748 |
| YGR154C   | 241.8276 | 298.6298 | 251.9545 | 222.9623 | 239.6708 | 190.7948 | -0.27822 | 229.3526 | 188.7702 |
| YBR127C   | 15734.92 | 14356.97 | 15805.95 | 16563.68 | 16071.77 | 16848.65 | 0.108539 | 17442.04 | 15761.88 |
| YOR048C   | 1713.521 | 1740.359 | 1910.902 | 1897.418 | 1992.264 | 2432.389 | 0.236878 | 1924.763 | 2176.565 |
| YLL005C   | 321.2852 | 264.0204 | 278.632  | 273.1065 | 294.9794 | 348.3228 | 0.085064 | 377.7572 | 280.9603 |

|                   |          |          |          |          |          |          |          |          |          |
|-------------------|----------|----------|----------|----------|----------|----------|----------|----------|----------|
| YCR087W           | 0        | 2.966521 | 0        | 2.686293 | 0        | 0        | -0.14316 | 1.124277 | 0        |
| YER047C           | 348.9227 | 414.3241 | 491.0642 | 386.8262 | 462.0577 | 565.5353 | 0.173315 | 356.396  | 542.6047 |
| YCR042C           | 727.7859 | 861.28   | 786.4932 | 787.0839 | 861.8931 | 950.0601 | 0.12971  | 770.1301 | 866.5871 |
| YKR009C           | 207.2808 | 245.2324 | 310.2498 | 211.3217 | 225.8436 | 221.1262 | -0.21251 | 276.5723 | 256.3763 |
| YLR289W           | 285.5869 | 316.4289 | 315.1901 | 246.2435 | 265.0206 | 294.5088 | -0.18687 | 259.7081 | 324.8604 |
| YOR293W           | 23953.6  | 19488.07 | 21638.44 | 23232.85 | 24477.53 | 22466.82 | 0.108786 | 26567.8  | 22804.32 |
| YDL186W           | 104.792  | 139.4265 | 94.85346 | 99.39284 | 48.39507 | 67.512   | -0.65524 | 62.95954 | 93.94611 |
| YPL101W           | 1365.75  | 1450.629 | 1406.993 | 1421.944 | 1413.827 | 1471.566 | 0.028401 | 1374.991 | 1288.906 |
| YOR020W- <i>f</i> | 855.609  | 719.8758 | 792.4216 | 726.1946 | 768.5597 | 656.5297 | -0.13841 | 858.948  | 752.4469 |
| YDR406W- <i>f</i> | 0        | 0        | 0        | 0        | 1.152263 | 0        | #DIV/0!  | 0        | 0        |
| YJR023C           | 0        | 0        | 0        | 0        | 1.152263 | 0        | #DIV/0!  | 0        | 0        |
| YEL003W           | 1133.135 | 1063.003 | 1159.979 | 1211.518 | 1272.099 | 1116.394 | 0.101208 | 1211.971 | 1280.126 |
| YHR119W           | 1270.171 | 1077.836 | 1291.39  | 1188.237 | 1340.082 | 1585.064 | 0.176626 | 1234.457 | 1121.207 |
| YIRO20C- <i>f</i> | 0        | 0        | 0        | 0        | 0        | 0.978435 | #DIV/0!  | 0        | 0        |
| YNL338W           | 0        | 0        | 0        | 0        | 0        | 0.978435 | #DIV/0!  | 0        | 0        |
| YOR072W- <i>f</i> | 0        | 0        | 0        | 0        | 0        | 0.978435 | #DIV/0!  | 0        | 0        |
| YGR293C           | 0        | 0        | 0        | 0.895431 | 0        | 0        | #DIV/0!  | 0        | 0        |
| YOR346W           | 542.3847 | 389.6031 | 466.3628 | 591.8799 | 651.0289 | 593.9099 | 0.393483 | 494.6821 | 553.1407 |
| YOR073W           | 598.8112 | 490.4649 | 568.1327 | 578.4484 | 639.5062 | 718.1711 | 0.224243 | 539.6532 | 630.4048 |
| YOL038C- <i>f</i> | 32.24368 | 23.73217 | 9.880568 | 24.17664 | 20.74074 | 19.56869 | -0.03034 | 28.10694 | 29.85204 |
| YLR065C           | 1462.481 | 1293.403 | 1539.393 | 1387.918 | 1481.811 | 1312.081 | -0.03862 | 1586.356 | 1399.534 |
| YOR144C           | 502.0801 | 475.6322 | 575.0491 | 440.5521 | 566.9136 | 604.6727 | 0.054139 | 454.2081 | 456.5606 |
| YBL013W           | 33.39524 | 53.39738 | 55.33118 | 34.02638 | 35.72017 | 38.15895 | -0.39738 | 32.60405 | 29.85204 |
| YHR050W- <i>f</i> | 34.5468  | 17.79913 | 13.8328  | 30.44465 | 24.19753 | 26.41774 | 0.292621 | 13.49133 | 28.97404 |
| YHR118C           | 418.0163 | 469.6992 | 456.4823 | 463.8333 | 474.7325 | 579.2334 | 0.175236 | 430.5983 | 554.0187 |
| YPL111W           | 6532.8   | 5891.511 | 6503.39  | 5077.989 | 4561.811 | 4540.916 | -0.41657 | 6510.691 | 6050.305 |
| YGR047C           | 457.1693 | 502.3309 | 592.8341 | 548.8992 | 555.391  | 684.9043 | 0.204871 | 476.6937 | 586.5047 |
| YPR102C           | 27434.76 | 20224.75 | 25450.37 | 26897.85 | 25332.51 | 25096.85 | 0.08091  | 32590.56 | 27544.65 |
| YKL042W           | 736.9984 | 640.7686 | 741.0426 | 693.0636 | 678.6832 | 801.338  | 0.036491 | 650.9567 | 725.2289 |
| YDL027C           | 374.257  | 281.8195 | 278.632  | 289.2242 | 270.7819 | 228.9537 | -0.24456 | 278.8208 | 358.2244 |
| YDR073W           | 1083.618 | 981.9186 | 1038.448 | 851.5549 | 907.9836 | 676.0984 | -0.34982 | 857.8237 | 810.395  |
| YLR291C           | 2070.505 | 2071.621 | 2097.645 | 2316.48  | 2313.745 | 2044.929 | 0.097308 | 2139.5   | 1943.016 |
| YGR041W           | 306.3149 | 371.804  | 342.8557 | 389.5125 | 331.8519 | 347.3443 | 0.065922 | 359.7688 | 357.3464 |
| YEL021W           | 0        | 1.977681 | 0.988057 | 0        | 1.152263 | 0        | -1.36392 | 3.372832 | 0        |
| YGR259C           | 0        | 0        | 0.988057 | 0        | 0        | 0        | #NUM!    | 1.124277 | 0        |
| YDR164C           | 932.7636 | 838.5367 | 956.439  | 847.9732 | 1033.58  | 1067.472 | 0.112533 | 880.3093 | 777.031  |
| YLR451W           | 912.0355 | 919.6216 | 871.4661 | 924.9802 | 920.6585 | 1090.955 | 0.119516 | 771.2544 | 888.5371 |
| YBL100C           | 72.54828 | 156.2368 | 112.6385 | 80.58879 | 117.5309 | 137.9593 | -0.02276 | 95.56359 | 94.82412 |
| YJL052C- <i>f</i> | 0        | 6.921883 | 0.988057 | 5.372586 | 2.304527 | 0        | -0.0431  | 2.248555 | 0        |
| YJR143C           | 4197.436 | 4587.231 | 4427.483 | 4563.117 | 4549.136 | 4633.867 | 0.057159 | 4662.379 | 4630.578 |
| YGR211W           | 4425.445 | 4857.184 | 4817.765 | 5140.67  | 4846.42  | 5174.941 | 0.104728 | 5344.815 | 5518.237 |
| YOR022C           | 337.4071 | 305.5517 | 329.0229 | 260.5704 | 278.8478 | 301.3579 | -0.20921 | 242.8439 | 299.3984 |
| YMR244C- <i>f</i> | 19.57652 | 17.79913 | 21.73725 | 19.69948 | 5.761317 | 13.69809 | -0.59413 | 13.49133 | 12.29202 |
| YPL055C           | 1176.894 | 1439.752 | 1182.704 | 1188.237 | 1066.996 | 1029.313 | -0.21006 | 1140.017 | 1286.272 |
| YHR126C           | 2.30312  | 1.977681 | 3.952227 | 0        | 2.304527 | 0        | -1.83695 | 2.248555 | 1.756002 |
| YHL019C           | 158.9153 | 226.4445 | 243.062  | 213.1126 | 224.6914 | 206.4497 | 0.035896 | 225.9798 | 196.6722 |
| YOR386W           | 333.9524 | 292.6968 | 440.6733 | 287.4334 | 293.8272 | 370.8268 | -0.16483 | 372.1358 | 349.4444 |
| YDR292C           | 2155.72  | 2030.089 | 2302.172 | 2214.401 | 2331.029 | 2826.698 | 0.184311 | 2267.668 | 2334.605 |
| YJR041C           | 1211.441 | 1185.62  | 1362.53  | 1406.722 | 1488.724 | 1675.08  | 0.281785 | 1281.676 | 1305.588 |
| YLR087C           | 817.6076 | 693.1771 | 681.7592 | 831.8554 | 819.2593 | 809.1655 | 0.166217 | 673.4422 | 820.931  |
| YNL299W           | 913.187  | 903.8002 | 1025.603 | 975.1244 | 1045.103 | 1166.294 | 0.164776 | 822.9711 | 927.1691 |
| YIL091C           | 2101.597 | 2086.453 | 2402.954 | 2459.749 | 2664.033 | 3388.319 | 0.369017 | 2210.33  | 2463.671 |
| YMR001C           | 915.4902 | 1077.836 | 1057.221 | 1124.661 | 1277.86  | 1340.456 | 0.295118 | 863.4451 | 1062.381 |
| YPL192C           | 104.792  | 138.4377 | 113.6265 | 132.5238 | 172.8395 | 125.2396 | 0.271016 | 87.69364 | 154.5282 |

|                   |          |          |          |          |          |          |          |          |          |
|-------------------|----------|----------|----------|----------|----------|----------|----------|----------|----------|
| YBR298C- <i>f</i> | 0        | 0        | 0        | 0        | 0        | 0        | #DIV/0!  | 0        | 0        |
| YCR040W           | 0        | 0        | 0        | 0        | 0        | 0        | #DIV/0!  | 0        | 0        |
| YDR269C           | 0        | 0        | 0        | 0        | 0        | 0        | #DIV/0!  | 0        | 0        |
| YOR282W           | 0        | 0        | 0        | 0        | 0        | 0        | #DIV/0!  | 0        | 0        |
| YJL033W           | 2901.931 | 3086.171 | 3006.657 | 3452.782 | 3425.679 | 3998.863 | 0.274167 | 3264.902 | 3441.764 |
| YGL199C           | 0        | 0        | 0        | 0        | 0        | 0        | #DIV/0!  | 0        | 0        |
| YHL019W- <i>f</i> | 0        | 0        | 0        | 0        | 0        | 0        | #DIV/0!  | 0        | 0        |
| YHR218W- <i>f</i> | 0        | 0        | 0        | 0        | 0        | 0        | #DIV/0!  | 0        | 0        |
| YJL032W           | 0        | 0        | 0        | 0        | 0        | 0        | #DIV/0!  | 0        | 0        |
| YJL222W- <i>f</i> | 0        | 0        | 0        | 0        | 0        | 0        | #DIV/0!  | 0        | 0        |
| YKL177W           | 0        | 0        | 0        | 0        | 0        | 0        | #DIV/0!  | 0        | 0        |
| YLL065W           | 0        | 0        | 0        | 0        | 0        | 0        | #DIV/0!  | 0        | 0        |
| YOL050C           | 0        | 0        | 0        | 0        | 0        | 0        | #DIV/0!  | 0        | 0        |
| YNL151C           | 1706.612 | 1626.643 | 1728.111 | 2020.988 | 2106.338 | 1792.492 | 0.226026 | 2094.529 | 1922.822 |
| YER144C           | 648.3282 | 692.1883 | 624.4519 | 603.5205 | 603.7861 | 618.3707 | -0.10607 | 568.8844 | 700.6449 |
| YKL121W           | 428.3803 | 345.1053 | 449.5659 | 380.5582 | 346.8313 | 485.3036 | -0.01227 | 382.2543 | 443.3905 |
| Q0105             | 2.30312  | 5.933043 | 1.976114 | 0        | 1.152263 | 0        | -3.14776 | 4.49711  | 0        |
| YFL004W           | 2912.295 | 2533.409 | 2629.219 | 2710.47  | 2897.943 | 3317.872 | 0.144611 | 2721.876 | 2501.425 |
| YOR299W           | 1120.468 | 1009.606 | 1188.632 | 1186.446 | 1094.65  | 1392.313 | 0.146499 | 1078.182 | 1230.958 |
| YLR421C           | 1982.986 | 1877.808 | 1902.997 | 1798.026 | 1792.922 | 1743.571 | -0.11166 | 2193.465 | 1986.038 |
| YKL005C           | 780.7576 | 765.3625 | 919.8809 | 819.3194 | 879.177  | 958.866  | 0.107822 | 713.9162 | 845.515  |
| YLR442C           | 663.2985 | 570.5609 | 716.3412 | 612.4748 | 660.247  | 796.4459 | 0.085428 | 611.6069 | 702.4009 |
| YPR081C           | 512.4442 | 564.6279 | 531.5746 | 512.1865 | 490.8642 | 472.584  | -0.12451 | 523.9133 | 507.4846 |
| YDL104C           | 201.523  | 239.2994 | 215.3964 | 215.7989 | 225.8436 | 154.5927 | -0.1383  | 233.8497 | 212.4763 |
| YCR038C           | 154.309  | 154.2591 | 169.9458 | 115.5106 | 142.8807 | 129.1534 | -0.3042  | 155.1503 | 154.5282 |
| YNL137C           | 1779.16  | 1792.768 | 1807.156 | 1890.255 | 1913.91  | 2007.748 | 0.111653 | 2027.072 | 1873.654 |
| YOL135C           | 1069.799 | 1020.483 | 966.3196 | 924.9802 | 796.2141 | 769.0497 | -0.29564 | 888.1792 | 849.905  |
| YJL120W           | 4.60624  | 6.921883 | 16.79697 | 8.95431  | 9.218108 | 5.870608 | -0.23646 | 14.61561 | 14.92602 |
| YDR348C           | 1225.26  | 1301.314 | 1241.987 | 1327.029 | 1205.268 | 1454.932 | 0.081373 | 1106.289 | 1308.222 |
| YBR136W           | 381.1663 | 372.7928 | 336.9274 | 363.545  | 346.8313 | 362.9993 | -0.02335 | 373.2601 | 403.0025 |
| YOR310C           | 5733.617 | 6778.501 | 6564.65  | 6701.406 | 7094.486 | 7002.657 | 0.124666 | 6895.194 | 7140.783 |
| YPR123C           | 57.578   | 94.92868 | 93.8654  | 83.27509 | 95.63787 | 90.01599 | 0.126386 | 52.84104 | 91.31211 |
| YNL286W           | 681.7235 | 679.3334 | 681.7592 | 730.6717 | 702.8807 | 595.8667 | -0.00949 | 742.0231 | 585.6267 |
| YDR525W- <i>f</i> | 345.468  | 367.8486 | 309.2618 | 230.1258 | 274.2387 | 209.385  | -0.51872 | 306.9278 | 240.5723 |
| YLR075W           | 14971.43 | 13489.76 | 15660.7  | 15773.91 | 15321.65 | 15298.81 | 0.072455 | 17964.83 | 15896.21 |
| YAL030W           | 1055.98  | 770.3067 | 874.4303 | 831.8554 | 781.2346 | 929.513  | -0.08704 | 1196.231 | 1077.307 |
| YIL134W           | 507.8379 | 515.1859 | 447.5897 | 419.0617 | 411.3581 | 415.8348 | -0.23882 | 491.3093 | 440.7565 |
| YEL001C           | 3721.842 | 3186.044 | 3388.047 | 3641.718 | 3411.852 | 3199.482 | -0.00602 | 3476.266 | 3273.188 |
| YAL055W           | 365.0445 | 319.3955 | 326.0588 | 281.1653 | 311.1111 | 244.6087 | -0.27197 | 278.8208 | 327.4944 |
| YMR071C           | 1531.575 | 1240.995 | 1326.96  | 1158.688 | 1349.301 | 1122.265 | -0.17539 | 1292.919 | 1221.299 |
| YHR024C           | 1289.747 | 1533.692 | 1369.447 | 1430.899 | 1471.44  | 1420.687 | 0.044098 | 1387.358 | 1304.71  |
| YLR154W- <i>C</i> | 2.30312  | 5.933043 | 5.928341 | 0.895431 | 3.45679  | 5.870608 | -0.47049 | 6.745665 | 3.512004 |
| YKL184W           | 1044.465 | 1119.367 | 1025.603 | 987.6604 | 979.4239 | 974.521  | -0.1167  | 1072.561 | 1049.211 |
| YCR075W- <i>f</i> | 229.1604 | 202.7123 | 224.2889 | 208.6354 | 254.6502 | 181.0104 | -0.02633 | 238.3468 | 206.3303 |
| YLR371W           | 874.034  | 886.001  | 1015.722 | 893.6402 | 952.9219 | 1271.965 | 0.167983 | 775.7515 | 997.4092 |
| YDR263C           | 155.4606 | 112.7278 | 139.316  | 86.85681 | 147.4897 | 76.31791 | -0.39146 | 122.5462 | 126.4322 |
| YOR167C           | 14057.09 | 10675.52 | 12264.75 | 12697.21 | 13217.61 | 13407.49 | 0.087926 | 15707.28 | 13630.09 |
| YNL229C           | 1491.27  | 1716.627 | 1517.655 | 1453.285 | 1511.77  | 1569.409 | -0.05955 | 1450.318 | 1507.528 |
| YBR191W           | 18201.56 | 15283.52 | 16882.93 | 17945.33 | 17747.16 | 15465.14 | 0.022442 | 19156.56 | 16639    |
| YNL292W           | 1364.599 | 1507.982 | 1355.614 | 1607.299 | 1580.905 | 1634.964 | 0.18994  | 1554.876 | 1553.184 |
| YMR146C           | 9546.432 | 9383.107 | 9222.522 | 10010.02 | 9405.927 | 8806.891 | 0.003623 | 10423.18 | 10048.72 |
| YOR024W           | 0        | 1.977681 | 2.96417  | 3.581724 | 0        | 0        | -0.4644  | 0        | 7.024009 |
| YLR234W           | 152.0059 | 190.8462 | 168.9577 | 154.9096 | 135.9671 | 156.5496 | -0.19396 | 67.45665 | 145.7482 |
| YMR242W- <i>f</i> | 5.7578   | 5.933043 | 0.988057 | 4.477155 | 1.152263 | 0.978435 | -0.94018 | 1.124277 | 4.390005 |



|           |          |          |          |          |          |          |          |          |          |
|-----------|----------|----------|----------|----------|----------|----------|----------|----------|----------|
| YCR094W   | 851.0028 | 752.5076 | 825.0274 | 890.0584 | 851.5227 | 759.2653 | 0.042329 | 930.9018 | 887.6591 |
| YPL129W   | 3060.846 | 2848.849 | 2839.675 | 3110.727 | 2780.412 | 2844.31  | -0.0023  | 3044.543 | 2684.049 |
| YJL152W   | 4.60624  | 9.888404 | 3.952227 | 8.95431  | 10.37037 | 5.870608 | 0.449778 | 10.1185  | 2.634003 |
| YIL013C   | 446.8053 | 338.1834 | 453.5181 | 363.545  | 376.7902 | 479.433  | -0.02199 | 254.0867 | 381.9305 |
| YPL208W   | 756.5749 | 756.4629 | 878.3825 | 766.489  | 844.6091 | 783.7262 | 0.002052 | 793.7399 | 753.3249 |
| YFR001W   | 2428.64  | 2024.156 | 2137.167 | 2406.919 | 2659.424 | 2314.977 | 0.163608 | 2851.168 | 2351.287 |
| YLR102C   | 324.7399 | 303.574  | 317.1662 | 296.3877 | 261.5638 | 259.2852 | -0.21029 | 300.1821 | 324.8604 |
| YMR063W   | 54.12332 | 96.90636 | 108.6863 | 112.8243 | 114.0741 | 112.52   | 0.38613  | 69.7052  | 135.2122 |
| YLR331C   | 4.60624  | 1.977681 | 5.928341 | 2.686293 | 5.761317 | 6.849043 | 0.289873 | 2.248555 | 8.780011 |
| YEL018W   | 254.4947 | 248.1989 | 209.468  | 221.1715 | 260.4115 | 222.1047 | -0.01727 | 305.8035 | 260.7663 |
| YPL137C   | 2562.221 | 2321.797 | 2714.192 | 2274.395 | 2287.243 | 3122.185 | 0.016165 | 2431.812 | 2678.781 |
| YNL260C   | 367.3476 | 362.9044 | 373.4855 | 373.3947 | 354.8971 | 333.6462 | -0.0557  | 445.2139 | 398.6125 |
| YLR059C   | 2086.627 | 1985.592 | 1992.911 | 2127.544 | 2074.074 | 1816.953 | -0.01112 | 2148.494 | 2011.5   |
| YOR207C   | 1807.949 | 1909.451 | 2028.481 | 2333.493 | 2233.087 | 2876.598 | 0.373391 | 2166.483 | 2358.311 |
| YGL004C   | 613.7814 | 567.5944 | 593.8222 | 539.9449 | 603.7861 | 529.3332 | -0.08549 | 648.7081 | 536.4587 |
| YFL003C   | 66.79048 | 67.24115 | 47.42673 | 78.79793 | 71.44034 | 53.81391 | 0.1693   | 53.96532 | 50.04606 |
| YCR057C   | 2740.713 | 3169.234 | 3120.283 | 3446.514 | 3505.185 | 4165.197 | 0.299919 | 2893.89  | 3250.36  |
| YDR316W   | 647.1767 | 743.608  | 715.3531 | 764.6981 | 689.0536 | 638.9179 | -0.00926 | 744.2717 | 721.7169 |
| YDR437W   | 32.24368 | 74.16303 | 80.0326  | 59.99388 | 63.37449 | 72.40417 | 0.070472 | 49.46821 | 48.29006 |
| YLR310C   | 1469.39  | 1344.823 | 1563.106 | 1395.082 | 1682.305 | 2041.015 | 0.225646 | 1452.567 | 1732.296 |
| YOR034C-f | 23.0312  | 23.73217 | 37.54616 | 25.07207 | 27.65432 | 24.46087 | -0.12733 | 42.72254 | 21.07203 |
| YOL065C   | 396.1366 | 469.6992 | 399.175  | 426.2252 | 397.5309 | 391.3739 | -0.05804 | 449.711  | 365.2484 |
| YDR170C   | 2671.619 | 2149.739 | 2715.18  | 2366.624 | 2412.84  | 3252.317 | 0.091818 | 2778.09  | 2802.579 |
| YHL011C   | 4872.25  | 5312.051 | 5287.092 | 5676.137 | 5689.877 | 5467.493 | 0.121733 | 5074.989 | 4878.174 |
| YDR314C   | 90.97324 | 119.6497 | 136.3518 | 95.81112 | 122.1399 | 153.6143 | 0.098785 | 122.5462 | 119.4081 |
| YOR084W   | 753.1202 | 834.5813 | 691.6398 | 723.5083 | 730.535  | 654.5728 | -0.11232 | 726.2833 | 698.0109 |
| YPL017C   | 325.8915 | 401.4692 | 362.6169 | 282.0608 | 297.284  | 286.6814 | -0.33182 | 251.8382 | 277.4483 |
| YGL027C   | 1213.744 | 1163.865 | 1258.784 | 1326.133 | 1348.148 | 1462.76  | 0.186091 | 1319.902 | 1434.654 |
| YPL035C   | 65.63892 | 75.15187 | 57.3073  | 76.11164 | 61.06996 | 78.27478 | 0.121181 | 76.45087 | 66.72808 |
| YNL155W   | 1678.974 | 1486.227 | 1612.509 | 1478.357 | 1554.403 | 1425.579 | -0.09981 | 1434.578 | 1309.1   |
| YOL147C   | 895.9136 | 859.3023 | 789.4574 | 744.9986 | 811.1935 | 698.6024 | -0.17448 | 816.2254 | 713.8149 |
| YDL230W   | 522.8082 | 588.3601 | 545.4074 | 510.3957 | 526.5844 | 427.576  | -0.17774 | 582.3757 | 518.8986 |
| YOR326W   | 7077.487 | 4552.621 | 7328.417 | 6233.991 | 6930.865 | 8887.123 | 0.218061 | 7058.214 | 7815.966 |
| YOR354C   | 1294.353 | 1476.339 | 1604.604 | 1442.539 | 1449.547 | 1510.703 | 0.009037 | 1437.951 | 1518.942 |
| YJL192C   | 2470.096 | 2172.482 | 2209.295 | 2453.481 | 2471.605 | 2174.082 | 0.051151 | 2527.376 | 2234.513 |
| YKR004C   | 215.3417 | 296.6521 | 306.2976 | 274.0019 | 278.8478 | 243.6302 | -0.03898 | 274.3237 | 236.1823 |
| YPR018W   | 779.6061 | 709.9874 | 896.1675 | 736.9397 | 825.0206 | 960.8229 | 0.080567 | 739.7746 | 829.711  |
| YDR457W   | 1845.951 | 1476.339 | 1522.596 | 1586.704 | 1605.103 | 1821.845 | 0.0494   | 1707.777 | 1728.784 |
| YAL053W   | 1764.19  | 2225.88  | 1965.245 | 2199.179 | 2181.235 | 2112.441 | 0.124675 | 1801.093 | 2019.402 |
| YOR369C   | 55575.43 | 42198.77 | 48411.82 | 52144.53 | 51546.51 | 49241.68 | 0.065092 | 61731.83 | 50089.08 |
| YGL061C   | 545.8394 | 493.4314 | 557.264  | 598.1479 | 623.3745 | 524.441  | 0.129079 | 532.9075 | 514.5086 |
| YML046W   | 485.9583 | 517.1635 | 512.8015 | 551.5855 | 557.6955 | 587.0608 | 0.16223  | 544.1503 | 633.9168 |
| YKL079W   | 766.9389 | 743.608  | 764.756  | 811.2605 | 837.6955 | 934.4052 | 0.183191 | 804.9827 | 895.5611 |
| YJR031C   | 900.5199 | 771.2955 | 873.4422 | 868.5681 | 869.9589 | 1054.753 | 0.134148 | 786.9942 | 863.9531 |
| YHL025W   | 1621.396 | 1718.605 | 1387.232 | 1650.279 | 1534.815 | 1304.253 | -0.07449 | 1598.723 | 1400.412 |
| YLR154W-f | 0        | 0        | 0        | 0        | 1.152263 | 0        | #DIV/0!  | 0        | 0.878001 |
| YDR062W   | 2972.176 | 3118.803 | 3375.202 | 3521.73  | 3464.856 | 3441.155 | 0.139572 | 3170.462 | 3283.724 |
| YOR305W   | 743.9077 | 830.626  | 720.2934 | 736.9397 | 835.391  | 743.6104 | 0.013213 | 790.3671 | 664.6468 |
| YER019W   | 1210.289 | 1362.622 | 1117.492 | 1220.472 | 1073.91  | 803.2949 | -0.25259 | 1036.584 | 913.1211 |
| YLR188W   | 1091.679 | 1224.184 | 1255.82  | 1058.399 | 1115.391 | 1264.138 | -0.05506 | 1057.945 | 1072.917 |
| YJL109C   | 3095.393 | 3165.278 | 3186.483 | 3591.574 | 4067.49  | 4743.451 | 0.392681 | 3512.243 | 3670.922 |
| YJL160C   | 41.45616 | 67.24115 | 69.16398 | 57.30759 | 48.39507 | 27.39617 | -0.41825 | 38.22543 | 31.60804 |
| YLR012C   | 0        | 0        | 0        | 1.790862 | 0        | 0        | #DIV/0!  | 0        | 0        |
| YLR329W   | 46.0624  | 53.39738 | 25.68948 | 23.28121 | 32.26338 | 19.56869 | -0.73651 | 48.34393 | 19.31602 |

|           |          |          |          |          |          |          |          |          |          |
|-----------|----------|----------|----------|----------|----------|----------|----------|----------|----------|
| YDL179W   | 483.6552 | 603.1927 | 496.0045 | 615.1611 | 631.4404 | 599.7805 | 0.222174 | 494.6821 | 459.1946 |
| YKL086W   | 94.42792 | 87.01796 | 91.88928 | 129.8375 | 101.3992 | 67.512   | 0.128261 | 102.3093 | 79.0201  |
| YLR337C   | 817.6076 | 882.0457 | 883.3228 | 877.5224 | 729.3828 | 810.1439 | -0.09579 | 771.2544 | 791.079  |
| YLR392C   | 292.4962 | 315.4401 | 329.0229 | 216.6943 | 245.4321 | 315.056  | -0.26973 | 265.3295 | 271.3023 |
| YDR161W   | 2204.086 | 2274.333 | 2348.611 | 2541.233 | 2672.099 | 2437.281 | 0.164317 | 2725.249 | 2474.207 |
| YJL006C   | 355.832  | 363.8933 | 302.3454 | 257.8841 | 298.4362 | 330.7109 | -0.20444 | 296.8093 | 328.3724 |
| YNL083W   | 693.2391 | 730.7531 | 740.0546 | 646.5012 | 762.7984 | 793.5106 | 0.025614 | 685.8093 | 762.1049 |
| YER069W   | 1026.04  | 1276.593 | 1071.054 | 950.9477 | 1015.144 | 948.1032 | -0.21123 | 791.4913 | 913.9991 |
| YMR197C   | 1163.076 | 1149.033 | 1305.223 | 1198.087 | 1075.062 | 1061.602 | -0.11735 | 1152.384 | 1209.007 |
| YOR025W   | 723.1796 | 878.0903 | 767.7202 | 833.6463 | 728.2305 | 702.5161 | -0.06515 | 680.1879 | 739.2769 |
| YJL213W   | 905.1261 | 1229.129 | 966.3196 | 860.5092 | 808.889  | 779.8125 | -0.34022 | 722.9104 | 640.9408 |
| YJL058C   | 198.0683 | 198.7569 | 209.468  | 190.7268 | 207.4074 | 231.889  | 0.055389 | 168.6416 | 215.1103 |
| YLL001W   | 1106.649 | 852.3805 | 1154.05  | 921.3985 | 876.8725 | 1024.421 | -0.14127 | 983.7428 | 1048.333 |
| YLR405W   | 749.6655 | 907.7555 | 880.3586 | 881.9996 | 922.963  | 858.0872 | 0.069513 | 993.8613 | 725.2289 |
| YGR022C   | 0        | 0.98884  | 0        | 0        | 0        | 0        | #NUM!    | 0        | 0        |
| YNR069C   | 31.09212 | 56.3639  | 38.53422 | 41.18983 | 63.37449 | 65.55513 | 0.433236 | 37.10116 | 36.87605 |
| YML057C-1 | 0        | 1.977681 | 1.976114 | 2.686293 | 0        | 2.935304 | 0.507742 | 0        | 1.756002 |
| YOL138C   | 679.4204 | 527.052  | 594.8102 | 646.5012 | 549.6297 | 704.473  | 0.077433 | 535.1561 | 577.7247 |
| YDR249C   | 186.5527 | 245.2324 | 236.1456 | 210.4263 | 228.1482 | 209.385  | -0.04379 | 248.4653 | 194.0382 |
| YDR003W-1 | 141.6419 | 114.7055 | 136.3518 | 118.1969 | 111.7696 | 78.27478 | -0.34936 | 123.6705 | 107.9941 |
| YLR242C   | 199.2199 | 286.7637 | 220.3367 | 267.7339 | 294.9794 | 226.9969 | 0.161001 | 258.5838 | 285.3503 |
| YPR088C   | 2098.142 | 2125.018 | 2211.271 | 2312.003 | 2388.642 | 2539.038 | 0.170114 | 2167.607 | 2371.481 |
| YJR042W   | 1482.058 | 1515.892 | 1600.652 | 1670.874 | 1788.313 | 1933.387 | 0.229779 | 1762.867 | 1646.252 |
| YOL090W   | 981.1291 | 742.6192 | 937.6659 | 899.0128 | 918.354  | 1230.871 | 0.195782 | 985.9913 | 911.3651 |
| YMR316W   | 394.9851 | 522.1077 | 360.6407 | 354.5907 | 237.3663 | 288.6382 | -0.53704 | 207.9913 | 316.0804 |
| YOR304C-1 | 616.0846 | 577.4828 | 551.3357 | 547.1084 | 652.1811 | 524.441  | -0.01761 | 592.4942 | 571.5787 |
| YIL136W   | 1881.649 | 2019.212 | 1834.822 | 1458.657 | 1462.222 | 1188.798 | -0.48094 | 1717.896 | 1880.678 |
| YFR036W-1 | 8.06092  | 5.933043 | 0.988057 | 3.581724 | 1.152263 | 4.892174 | -0.6382  | 2.248555 | 4.390005 |
| YOR137C   | 239.5245 | 218.5337 | 263.8112 | 143.269  | 148.642  | 205.4713 | -0.53738 | 207.9913 | 214.2323 |
| YFR023W   | 0        | 0        | 1.976114 | 10.74517 | 2.304527 | 4.892174 | 3.182593 | 4.49711  | 0        |
| YOR067C   | 859.0637 | 1059.048 | 910.9884 | 950.9477 | 1020.905 | 1035.184 | 0.087999 | 998.3584 | 941.2172 |
| YKL189W   | 449.1084 | 424.2125 | 412.0197 | 382.349  | 377.9424 | 470.6271 | -0.06242 | 391.2486 | 396.8565 |
| YJL134W   | 1243.685 | 1357.678 | 1144.17  | 1361.951 | 1329.712 | 1144.769 | 0.034594 | 1278.303 | 1193.203 |
| YKL115C   | 0        | 1.977681 | 5.928341 | 11.6406  | 9.218108 | 14.67652 | 2.168226 | 14.61561 | 11.41401 |
| YHR194W   | 377.7117 | 434.101  | 404.1152 | 365.3359 | 308.8066 | 341.4737 | -0.2597  | 421.6041 | 371.3945 |
| YKR083C   | 404.1975 | 313.4624 | 261.8351 | 256.9887 | 300.7408 | 306.2501 | -0.18104 | 344.0289 | 304.6664 |
| YDL121C   | 1331.203 | 1249.894 | 1208.393 | 1306.434 | 1198.354 | 1108.567 | -0.06867 | 1522.272 | 1183.545 |
| YBR162C   | 14999.07 | 13732.03 | 16274.28 | 16476.83 | 16203.13 | 15937.72 | 0.111384 | 15186.74 | 15214    |
| YBR288C   | 606.8721 | 585.3935 | 693.6159 | 693.959  | 754.7326 | 789.5968 | 0.247157 | 800.4856 | 719.9609 |
| YOR235W   | 8.06092  | 8.899564 | 0.988057 | 7.163448 | 6.913581 | 0.978435 | -0.25358 | 0        | 3.512004 |
| YAL020C   | 224.5542 | 220.5114 | 225.277  | 197.8903 | 208.5597 | 167.3123 | -0.22445 | 269.8266 | 193.1602 |
| YGR271W   | 747.3624 | 659.5566 | 689.6637 | 700.2271 | 685.5968 | 859.0657 | 0.098605 | 739.7746 | 776.1529 |
| YLR094C   | 981.1291 | 1234.073 | 963.3554 | 822.9011 | 843.4569 | 676.0984 | -0.44035 | 808.3555 | 856.051  |
| YNL094W   | 1074.405 | 1032.349 | 981.1404 | 915.1305 | 949.4651 | 1026.378 | -0.09507 | 914.0376 | 996.5312 |
| YML058W   | 9830.867 | 9770.732 | 9246.236 | 10444.31 | 10425.68 | 8236.463 | 0.012876 | 11320.35 | 9635.184 |
| YBL020W   | 909.7324 | 1009.606 | 965.3315 | 977.8107 | 1075.062 | 1124.221 | 0.139302 | 920.7833 | 1158.961 |
| YJL207C   | 1001.857 | 886.9899 | 1013.746 | 920.5031 | 1053.169 | 1270.987 | 0.160724 | 971.3757 | 1072.917 |
| YBR051W   | 2.30312  | 1.977681 | 0.988057 | 0        | 0        | 1.956869 | -1.42894 | 0        | 0        |
| YHR102W   | 853.3059 | 890.9452 | 1058.209 | 954.5295 | 982.8807 | 1262.181 | 0.191194 | 617.2283 | 993.0192 |
| YBL083C   | 1.15156  | 0        | 0        | 0        | 0        | 0        | #NUM!    | 0        | 0        |
| YLR154C-1 | 1.15156  | 0        | 0        | 0        | 0        | 0        | #NUM!    | 0        | 0        |
| YNL028W   | 0        | 0        | 0        | 0.895431 | 0        | 0.978435 | #DIV/0!  | 0        | 3.512004 |
| Q0143     | 0        | 0        | 0.988057 | 0        | 0        | 0        | #NUM!    | 0        | 0        |
| YBR224W   | 0        | 0.98884  | 0        | 0        | 0        | 0        | #NUM!    | 0        | 0        |

|           |          |          |          |          |          |          |          |          |          |
|-----------|----------|----------|----------|----------|----------|----------|----------|----------|----------|
| YCL068C   | 0        | 0        | 0.988057 | 0        | 0        | 0        | #NUM!    | 0        | 0        |
| YDL151C   | 0        | 0        | 0.988057 | 0        | 0        | 0        | #NUM!    | 0        | 0        |
| YDR521W   | 0        | 0.98884  | 0        | 0        | 0        | 0        | #NUM!    | 0        | 0        |
| YDR544C   | 0        | 0.98884  | 0        | 0        | 0        | 0        | #NUM!    | 0        | 0        |
| YJL086C   | 0        | 0        | 0.988057 | 0        | 0        | 0        | #NUM!    | 0        | 0        |
| YJL220W   | 0        | 0        | 0.988057 | 0        | 0        | 0        | #NUM!    | 0        | 0        |
| YJL221C   | 0        | 0.98884  | 0        | 0        | 0        | 0        | #NUM!    | 0        | 0        |
| YMR159C   | 0        | 0        | 0.988057 | 0        | 0        | 0        | #NUM!    | 0        | 0        |
| YNR005C   | 0        | 0        | 0.988057 | 0        | 0        | 0        | #NUM!    | 0        | 0        |
| YLL059C   | 8.06092  | 31.64289 | 22.72531 | 17.90862 | 24.19753 | 33.26678 | 0.271827 | 22.48555 | 28.97404 |
| YJR024C   | 1499.331 | 1443.707 | 1521.608 | 1563.423 | 1431.111 | 1387.42  | -0.02697 | 1690.913 | 1495.236 |
| YPR183W   | 8074.738 | 7029.667 | 7295.812 | 7958.591 | 7570.371 | 6802.078 | -0.00446 | 7746.272 | 6737.78  |
| YJL092W   | 657.5407 | 659.5566 | 782.541  | 787.0839 | 668.3128 | 755.3516 | 0.074394 | 659.9509 | 698.0109 |
| YDR366C   | 1.15156  | 0        | 1.976114 | 0        | 0        | 0.978435 | -1.67654 | 5.621387 | 0        |
| YFL029C   | 380.0148 | 440.034  | 420.9122 | 449.5064 | 445.926  | 295.4873 | -0.05938 | 445.2139 | 409.1485 |
| YIL008W   | 947.7338 | 808.8715 | 874.4303 | 1021.687 | 942.5515 | 786.6615 | 0.064273 | 1045.578 | 795.469  |
| YLL033W   | 302.8603 | 321.3731 | 254.9187 | 283.8516 | 268.4774 | 292.552  | -0.05736 | 328.289  | 301.1544 |
| YPR075C   | 1804.494 | 1689.928 | 1437.623 | 1497.161 | 1264.033 | 1154.553 | -0.3329  | 1556     | 1398.656 |
| YHL031C   | 315.5274 | 235.344  | 266.7753 | 285.6425 | 284.6091 | 266.1342 | 0.032691 | 312.5491 | 285.3503 |
| YBL096C   | 2.30312  | 5.933043 | 1.976114 | 1.790862 | 0        | 2.935304 | -1.11156 | 2.248555 | 7.024009 |
| YOR224C   | 6041.083 | 5304.14  | 5875.974 | 6318.161 | 6593.252 | 6213.06  | 0.151235 | 6684.954 | 6037.135 |
| YEL009C-1 | 3.45468  | 0.98884  | 0        | 0.895431 | 6.913581 | 1.956869 | 1.136047 | 0        | 5.268006 |
| YOR172W   | 886.7012 | 822.7152 | 816.1349 | 792.4565 | 811.1935 | 794.489  | -0.07468 | 772.3786 | 780.543  |
| YDR257C   | 953.4916 | 968.0748 | 1075.006 | 1077.204 | 1007.078 | 1015.615 | 0.048907 | 1024.217 | 1055.357 |
| YGL126W   | 1706.612 | 1953.949 | 1489.002 | 1799.816 | 1691.523 | 1292.512 | -0.10628 | 1794.347 | 1511.918 |
| YDR136C   | 2.30312  | 5.933043 | 0        | 0.895431 | 2.304527 | 0.978435 | -0.97902 | 0        | 1.756002 |
| YGR106C   | 4365.564 | 4371.664 | 4587.548 | 4598.934 | 4825.679 | 4257.169 | 0.038145 | 4832.145 | 4230.209 |
| YLR261C   | 8.06092  | 3.955362 | 0.988057 | 0.895431 | 4.609054 | 0        | -1.24031 | 2.248555 | 0.878001 |
| YJL117W   | 1946.136 | 1925.272 | 1996.863 | 1948.458 | 1958.848 | 1912.84  | -0.01188 | 1992.22  | 1904.384 |
| YOL040C   | 44593.01 | 35504.32 | 40332.48 | 44583.51 | 42680.99 | 39216.64 | 0.07073  | 48650.86 | 42218.68 |
| YHR071C-1 | 1.15156  | 3.955362 | 0        | 0.895431 | 1.152263 | 0        | -1.31845 | 0        | 0        |
| YJR151C   | 116.3076 | 127.5604 | 136.3518 | 93.12483 | 94.4856  | 164.377  | -0.11131 | 79.8237  | 133.4562 |
| YMR080C   | 1989.896 | 1991.525 | 2279.447 | 2316.48  | 2464.692 | 2978.355 | 0.309606 | 2159.737 | 2503.181 |
| YHR214W-1 | 0        | 3.955362 | 0        | 0.895431 | 1.152263 | 1.956869 | 0.017836 | 0        | 0        |
| YFR042W   | 316.679  | 248.1989 | 275.6679 | 281.1653 | 375.6379 | 288.6382 | 0.169662 | 328.289  | 342.4204 |
| YLR274W   | 652.9345 | 708.9986 | 645.2011 | 763.8027 | 708.642  | 687.8396 | 0.106084 | 613.8555 | 720.8389 |
| YDR310C   | 1973.774 | 1687.951 | 2297.232 | 2155.302 | 2188.148 | 2444.13  | 0.187838 | 1723.517 | 2074.717 |
| YLR141W   | 222.2511 | 254.132  | 239.1098 | 344.7409 | 308.8066 | 239.7165 | 0.320149 | 216.9856 | 263.4003 |
| YEL053W-1 | 1.15156  | 0        | 2.96417  | 3.581724 | 8.065844 | 0.978435 | 1.617178 | 1.124277 | 0.878001 |
| YKL057C   | 1004.16  | 1013.561 | 1141.206 | 917.8168 | 1083.128 | 1457.868 | 0.130842 | 1115.283 | 1186.179 |
| YDR395W   | 3144.91  | 3419.41  | 3453.259 | 3577.247 | 3706.832 | 4328.595 | 0.213166 | 3387.448 | 3616.486 |
| YIL173W   | 0        | 0        | 4.940284 | 0.895431 | 1.152263 | 0        | -1.27059 | 0        | 0        |
| YJL143W   | 1814.858 | 1893.629 | 1662.9   | 1845.483 | 1711.111 | 1469.609 | -0.09583 | 1923.639 | 1795.512 |
| YDL148C   | 2048.625 | 2113.152 | 2385.169 | 2592.273 | 2685.926 | 3380.492 | 0.403327 | 2382.344 | 2777.995 |
| YPL202C   | 611.4783 | 630.8802 | 667.9264 | 706.4951 | 738.6009 | 862.001  | 0.272291 | 668.9451 | 779.665  |
| YNL113W   | 932.7636 | 842.492  | 829.9677 | 1024.373 | 933.3334 | 924.6208 | 0.145827 | 1051.199 | 900.8291 |
| YHL022C   | 27.63744 | 25.70985 | 31.61782 | 34.02638 | 25.3498  | 27.39617 | 0.030365 | 26.98266 | 19.31602 |
| YPL269W   | 397.2882 | 392.5697 | 371.5094 | 306.2374 | 391.7696 | 432.4681 | -0.03889 | 314.7977 | 345.9324 |
| YER112W   | 2003.714 | 1798.701 | 1755.777 | 1739.822 | 1898.93  | 1470.587 | -0.12148 | 1724.642 | 1730.54  |
| YML070W   | 2110.809 | 2316.853 | 2045.278 | 2196.492 | 1995.72  | 2192.672 | -0.01976 | 2179.974 | 2010.622 |
| YER014C-1 | 4.60624  | 1.977681 | 0.988057 | 2.686293 | 6.913581 | 0        | 0.342345 | 3.372832 | 2.634003 |
| YPL191C   | 170.4309 | 199.7458 | 216.3844 | 133.4192 | 165.9259 | 207.4282 | -0.21094 | 156.2746 | 152.7722 |
| YKL107W   | 112.8529 | 113.7166 | 115.6026 | 103.87   | 82.96297 | 62.61982 | -0.45596 | 75.32659 | 91.31211 |
| YGR178C   | 4014.338 | 3996.893 | 3881.087 | 3932.733 | 3910.782 | 4055.612 | 0.000826 | 3886.627 | 3971.199 |

|           |          |          |          |          |          |          |          |          |          |
|-----------|----------|----------|----------|----------|----------|----------|----------|----------|----------|
| YCR020W-I | 468.6849 | 438.0563 | 430.7928 | 496.0688 | 502.3869 | 468.6702 | 0.133417 | 608.2341 | 473.2426 |
| YMR168C   | 380.0148 | 367.8486 | 328.0349 | 374.2902 | 383.7037 | 497.0448 | 0.22219  | 366.5145 | 396.8565 |
| YLR325C   | 24243.79 | 19704.62 | 22093.94 | 23676.99 | 25019.1  | 23240.76 | 0.123339 | 28049.6  | 23713.05 |
| YKL162C-I | 3.45468  | 3.955362 | 5.928341 | 11.6406  | 9.218108 | 2.935304 | 0.835015 | 10.1185  | 3.512004 |
| YLR210W   | 366.1961 | 372.7928 | 346.8079 | 349.2181 | 346.8313 | 442.2525 | 0.068129 | 402.4913 | 401.2465 |
| YPL089C   | 770.3936 | 797.0054 | 828.9797 | 831.8554 | 858.4363 | 800.3596 | 0.055667 | 640.8382 | 811.273  |
| YGR171C   | 356.9836 | 452.8889 | 404.1152 | 401.1531 | 421.7284 | 454.9721 | 0.073969 | 371.0116 | 403.8805 |
| YDL160C   | 1062.89  | 1182.653 | 1286.45  | 1097.798 | 1176.461 | 1241.634 | -0.00659 | 1216.468 | 1116.817 |
| YAL016C-I | 2.30312  | 1.977681 | 3.952227 | 3.581724 | 4.609054 | 0.978435 | 0.155375 | 0        | 0        |
| YOR110W   | 837.1841 | 843.4809 | 829.9677 | 891.8493 | 724.7737 | 862.001  | -0.01851 | 745.396  | 762.1049 |
| YDR250C   | 12.66716 | 17.79913 | 12.84474 | 6.268017 | 18.43622 | 14.67652 | -0.13724 | 7.869942 | 14.04802 |
| YDR123C   | 598.8112 | 657.5789 | 668.9145 | 571.285  | 611.8519 | 716.2142 | -0.01958 | 602.6127 | 590.0167 |
| YBR272C   | 458.3209 | 400.4804 | 514.7776 | 488.0099 | 462.0577 | 470.6271 | 0.048657 | 491.3093 | 498.7046 |
| YGR084C   | 1173.44  | 1183.642 | 1326.96  | 1263.453 | 1219.095 | 1035.184 | -0.06664 | 1389.607 | 1403.046 |
| YAR008W   | 532.0207 | 446.9559 | 448.5778 | 464.7287 | 481.6461 | 533.2469 | 0.051683 | 545.2746 | 444.2685 |
| YDR444W   | 427.2287 | 561.6614 | 461.4225 | 405.6303 | 456.2963 | 479.433  | -0.11267 | 450.8353 | 500.4606 |
| YFL049W   | 815.3044 | 664.5008 | 649.1533 | 728.8809 | 743.2099 | 745.5673 | 0.058889 | 632.9682 | 723.4729 |
| YLR428C   | 0        | 1.977681 | 0        | 1.790862 | 5.761317 | 0        | 1.933083 | 0        | 0        |
| YFL015C   | 0        | 0        | 1.976114 | 8.95431  | 0        | 0        | 2.179916 | 4.49711  | 1.756002 |
| YDL239C   | 154.309  | 162.1698 | 181.8025 | 168.341  | 184.3622 | 189.8163 | 0.122715 | 203.4942 | 191.4042 |
| YAL054C   | 247.5854 | 245.2324 | 263.8112 | 234.6029 | 258.107  | 205.4713 | -0.11598 | 258.5838 | 212.4763 |
| YNL012W   | 177.3402 | 210.623  | 148.2085 | 144.1644 | 177.4486 | 131.1103 | -0.24407 | 176.5116 | 156.2842 |
| YJR080C   | 124.3685 | 140.4153 | 137.3399 | 134.3147 | 120.9877 | 124.2612 | -0.0833  | 102.3093 | 147.5042 |
| YDR230W   | 0        | 0        | 0.988057 | 0        | 1.152263 | 0.978435 | 1.10866  | 0        | 0        |
| YBR042C   | 859.0637 | 891.9341 | 903.0839 | 880.2087 | 985.1853 | 878.6344 | 0.048083 | 856.6994 | 899.9511 |
| YKR062W   | 1198.774 | 1199.463 | 1335.853 | 1150.629 | 1099.259 | 1235.763 | -0.09933 | 1174.87  | 1195.837 |
| YOR053W   | 2.30312  | 0.98884  | 0.988057 | 1.790862 | 1.152263 | 0        | -0.54027 | 1.124277 | 2.634003 |
| YER082C   | 2120.022 | 2429.581 | 2389.121 | 2808.072 | 2745.844 | 2710.264 | 0.252201 | 2557.731 | 2684.049 |
| YMR147W   | 230.312  | 321.3731 | 281.5962 | 303.5511 | 291.5227 | 302.3363 | 0.106964 | 252.9624 | 259.0103 |
| YKL185W   | 1563.818 | 1620.709 | 1568.046 | 1775.64  | 1724.938 | 1921.646 | 0.190176 | 1364.873 | 1602.352 |
| YOR181W   | 1036.404 | 1148.044 | 883.3228 | 888.2676 | 905.6791 | 687.8396 | -0.30581 | 821.8468 | 857.807  |
| YIL126W   | 2676.225 | 2230.824 | 2839.675 | 2534.07  | 2796.543 | 3325.7   | 0.160166 | 2707.26  | 2958.864 |
| YLR057W   | 722.0281 | 865.2354 | 860.5975 | 968.8564 | 929.8766 | 1118.351 | 0.301633 | 802.7341 | 989.5072 |
| YGR046W   | 419.1678 | 419.2683 | 576.0371 | 410.1074 | 422.8807 | 458.8859 | -0.1308  | 429.474  | 463.5846 |
| YAL039C   | 1533.878 | 1890.663 | 1478.133 | 1609.985 | 1524.445 | 1123.243 | -0.2035  | 1518.899 | 1443.434 |
| YMR167W   | 375.4085 | 478.5988 | 444.6256 | 488.0099 | 353.7449 | 525.4194 | 0.074203 | 446.3382 | 458.3166 |
| YNR017W   | 4717.941 | 4606.019 | 4201.218 | 4869.354 | 4641.317 | 3852.097 | -0.01743 | 4624.153 | 4605.116 |
| YHL003C   | 1982.986 | 1859.02  | 1944.496 | 1914.432 | 2051.029 | 1886.422 | 0.016209 | 1918.017 | 1770.05  |
| YAR015W   | 4326.411 | 4972.879 | 4272.358 | 5282.148 | 5031.935 | 4615.277 | 0.137556 | 4733.208 | 4225.819 |
| YLR214W   | 4090.341 | 4270.802 | 4266.429 | 3576.352 | 3545.515 | 3715.117 | -0.22061 | 4745.575 | 4566.484 |
| YDL006W   | 742.7562 | 647.6905 | 566.1566 | 537.2586 | 498.9301 | 541.0744 | -0.31093 | 574.5058 | 618.1128 |
| YOR264W   | 491.7161 | 428.1679 | 380.4019 | 436.0749 | 441.3169 | 352.2365 | -0.08061 | 355.2717 | 403.0025 |
| YNL157W   | 2022.139 | 1823.422 | 1717.243 | 1723.705 | 1517.531 | 1197.604 | -0.32563 | 1891.035 | 1472.408 |
| YPR037C   | 726.6343 | 553.7506 | 723.2576 | 693.0636 | 679.8354 | 536.1822 | -0.06975 | 673.4422 | 534.7027 |
| YHR173C   | 95.57947 | 89.98448 | 94.85346 | 101.1837 | 64.52675 | 77.29634 | -0.20658 | 82.07226 | 96.58012 |
| YML012W   | 4595.876 | 4148.186 | 4493.682 | 4587.293 | 4486.914 | 4303.156 | 0.015136 | 4916.465 | 4387.371 |
| YDR414C   | 450.2599 | 485.5207 | 375.4616 | 469.2059 | 456.2963 | 493.1311 | 0.113568 | 466.5752 | 428.4645 |
| YMR158C-I | 41.45616 | 26.69869 | 25.68948 | 30.44465 | 20.74074 | 31.30991 | -0.18596 | 26.98266 | 24.58403 |
| YEL064C   | 230.312  | 217.5449 | 210.4561 | 197.8903 | 251.1934 | 263.1989 | 0.113676 | 218.1098 | 214.2323 |
| YBR290W   | 1027.191 | 1145.077 | 962.3673 | 1006.464 | 1001.317 | 960.8229 | -0.07851 | 954.5116 | 985.9952 |
| YKL080W   | 4942.495 | 5018.365 | 5074.66  | 4762.798 | 4811.852 | 4376.538 | -0.10799 | 5097.474 | 4842.176 |
| YDR519W   | 1751.523 | 1419.975 | 1687.601 | 1582.227 | 1714.568 | 1518.531 | -0.01306 | 1740.382 | 1444.312 |
| YOR135C   | 0        | 1.977681 | 2.96417  | 0        | 0        | 0.978435 | -2.3365  | 0        | 6.146008 |
| YBL060W   | 492.8677 | 583.4159 | 511.8134 | 414.5846 | 463.2099 | 576.298  | -0.12718 | 511.5463 | 491.6806 |

|                   |          |          |          |          |          |          |          |          |          |
|-------------------|----------|----------|----------|----------|----------|----------|----------|----------|----------|
| YHR132W- <i>f</i> | 461.7755 | 360.9268 | 336.9274 | 327.7278 | 397.5309 | 303.3148 | -0.17302 | 427.2254 | 350.3224 |
| YER168C           | 1091.679 | 1041.249 | 1104.648 | 1096.903 | 1090.041 | 1324.801 | 0.117274 | 989.3642 | 1054.479 |
| YPR045C           | 369.6507 | 449.9224 | 413.0078 | 492.4871 | 390.6173 | 440.2956 | 0.102567 | 417.1069 | 446.0245 |
| YER060W- <i>f</i> | 169.2793 | 199.7458 | 233.1814 | 197.8903 | 243.1276 | 265.1558 | 0.229765 | 227.1041 | 162.4302 |
| YPL065W           | 680.5719 | 592.3154 | 550.3477 | 479.0556 | 506.9959 | 476.4977 | -0.31802 | 561.0145 | 538.2147 |
| YHR189W           | 40.3046  | 112.7278 | 78.05649 | 67.15733 | 84.11523 | 93.92973 | 0.085525 | 57.33815 | 93.94611 |
| YNL315C           | 1491.27  | 1229.129 | 1274.593 | 1361.055 | 1251.358 | 1160.424 | -0.08254 | 1367.121 | 1260.81  |
| YDL191W           | 22925.26 | 17297.79 | 21056.48 | 22450.25 | 22265.19 | 20532.45 | 0.090526 | 24457.53 | 21396.01 |
| YAL023C           | 9268.906 | 8867.921 | 9681.969 | 9460.229 | 10031.61 | 10903.68 | 0.127798 | 10071.28 | 10596.59 |
| YJR021C           | 467.5333 | 551.773  | 470.315  | 513.9774 | 464.3622 | 340.4953 | -0.17568 | 589.1214 | 498.7046 |
| YLR321C           | 696.6938 | 683.2887 | 874.4303 | 822.9011 | 845.7614 | 990.1759 | 0.238044 | 874.6879 | 768.2509 |
| YNL303W           | 272.9197 | 139.4265 | 128.4474 | 217.5897 | 168.2305 | 197.6438 | 0.109566 | 236.0983 | 182.6242 |
| YHR116W           | 549.2941 | 525.0743 | 574.061  | 585.6119 | 437.8601 | 371.8052 | -0.24054 | 623.974  | 523.2886 |
| YBL017C           | 3258.915 | 2901.258 | 3465.115 | 3250.415 | 3210.206 | 3854.054 | 0.099797 | 3444.786 | 3381.182 |
| YGR210C           | 2637.072 | 2801.385 | 2487.927 | 2919.105 | 2646.749 | 2343.351 | -0.00313 | 2971.465 | 2581.323 |
| YGR113W           | 791.1217 | 914.6774 | 970.2718 | 893.6402 | 866.5021 | 821.8852 | -0.05161 | 773.5029 | 856.929  |
| YIL032C           | 13.81872 | 13.84377 | 7.904455 | 22.38578 | 6.913581 | 5.870608 | -0.01619 | 25.85838 | 5.268006 |
| YIL102C- <i>f</i> | 272.9197 | 254.132  | 199.5875 | 239.0801 | 241.9753 | 222.1047 | -0.04739 | 276.5723 | 230.9143 |
| YLR326W           | 589.5987 | 609.1257 | 507.8612 | 514.8728 | 587.6544 | 534.2254 | -0.06028 | 482.315  | 478.5106 |
| YDL123W           | 655.2376 | 869.1907 | 682.7473 | 599.9388 | 701.7285 | 514.6567 | -0.28118 | 764.5087 | 624.2588 |
| YIL028W           | 13.81872 | 29.66521 | 24.70142 | 30.44465 | 13.82716 | 12.71965 | -0.25872 | 23.60983 | 7.90201  |
| YNL153C           | 2026.745 | 1604.888 | 1733.052 | 1806.084 | 1898.93  | 1583.107 | -0.02074 | 2009.084 | 1835.022 |
| YNL066W           | 3020.542 | 3467.863 | 3167.71  | 3663.208 | 3657.284 | 3397.125 | 0.150469 | 3334.607 | 3027.348 |
| YDR374W- <i>f</i> | 386.9241 | 282.8084 | 387.3183 | 340.2638 | 337.6132 | 296.4657 | -0.11754 | 373.2601 | 311.6904 |
| YJR132W           | 1242.533 | 1517.87  | 1555.201 | 1584.017 | 1658.107 | 1743.571 | 0.208232 | 1435.702 | 1369.682 |
| YHR049W           | 6601.893 | 6220.795 | 6199.069 | 6841.093 | 6631.276 | 6063.36  | 0.038465 | 6918.804 | 5972.163 |
| YGL003C           | 548.1425 | 608.1369 | 655.0817 | 578.4484 | 504.6914 | 528.3547 | -0.16867 | 504.8006 | 572.4567 |
| YMR030W- <i>f</i> | 0        | 4.944202 | 2.96417  | 7.163448 | 3.45679  | 0        | 0.425363 | 1.124277 | 7.90201  |
| YAL037C- <i>f</i> | 49.51708 | 83.0626  | 42.48644 | 42.98069 | 80.65844 | 62.61982 | 0.08941  | 121.422  | 70.24009 |
| YIL120W           | 289.0415 | 345.1053 | 298.3932 | 266.8384 | 304.1976 | 284.7245 | -0.12396 | 360.8931 | 273.9363 |
| YLR111W           | 5.7578   | 14.83261 | 4.940284 | 3.581724 | 9.218108 | 6.849043 | -0.37779 | 12.36705 | 3.512004 |
| YPR095C           | 619.5392 | 635.8244 | 675.8309 | 720.822  | 667.1605 | 973.5425 | 0.290225 | 577.8786 | 651.4768 |
| YHL018W           | 36.84992 | 59.33043 | 55.33118 | 14.3269  | 46.09054 | 57.72765 | -0.35887 | 38.22543 | 60.58207 |
| YDR335W           | 1450.966 | 1348.778 | 1522.596 | 1404.036 | 1458.766 | 1621.266 | 0.052996 | 1390.731 | 1511.918 |
| YOR227W           | 1187.258 | 1180.675 | 1120.456 | 1200.773 | 1168.395 | 1446.127 | 0.129233 | 1269.309 | 1255.542 |
| YGR011W           | 31.09212 | 29.66521 | 34.58199 | 35.81724 | 36.87243 | 45.008   | 0.303943 | 28.10694 | 25.46203 |
| YMR236W           | 2230.572 | 2002.402 | 2038.361 | 2357.67  | 2404.774 | 2072.325 | 0.12412  | 2466.665 | 2261.731 |
| YJL211C           | 0        | 6.921883 | 10.86863 | 2.686293 | 13.82716 | 3.913739 | 0.199383 | 7.869942 | 10.53601 |
| YNL109W           | 0        | 0.98884  | 0        | 3.581724 | 2.304527 | 0.978435 | 2.795384 | 4.49711  | 1.756002 |
| YKL008C           | 1665.156 | 1756.181 | 1675.744 | 1670.874 | 1607.408 | 1570.388 | -0.07208 | 1554.876 | 1483.822 |
| YCL059C           | 2919.204 | 2877.526 | 2809.046 | 3219.075 | 3295.474 | 2978.355 | 0.141544 | 3237.919 | 3003.642 |
| YMR076C           | 930.4604 | 802.9384 | 852.693  | 821.1103 | 880.3293 | 1160.424 | 0.146181 | 762.2601 | 784.933  |
| YDR072C           | 1703.157 | 2433.536 | 1901.021 | 1841.006 | 1597.037 | 1452.976 | -0.30387 | 1856.182 | 2001.842 |
| YMR312W           | 686.3297 | 582.427  | 592.8341 | 697.5408 | 667.1605 | 698.6024 | 0.14842  | 586.8728 | 731.3749 |
| YBR270C           | 261.4041 | 349.0607 | 249.9784 | 248.9298 | 268.4774 | 270.048  | -0.12788 | 264.2052 | 236.1823 |
| YIL074C           | 2582.949 | 2791.497 | 2455.321 | 2561.828 | 2559.177 | 2915.735 | 0.037641 | 2334     | 2231.879 |
| YFR027W           | 373.1054 | 390.592  | 316.1782 | 299.074  | 301.893  | 359.0855 | -0.16968 | 319.2948 | 332.7624 |
| YNL221C           | 1715.824 | 1749.259 | 1610.533 | 1805.189 | 1841.317 | 2141.794 | 0.189557 | 1542.509 | 1819.218 |
| YDL114W           | 4.60624  | 8.899564 | 2.96417  | 3.581724 | 4.609054 | 0        | -1.00777 | 4.49711  | 3.512004 |
| YGL249W           | 147.3997 | 155.2479 | 147.2205 | 140.5827 | 129.0535 | 152.6358 | -0.09133 | 148.4046 | 149.2602 |
| YLR346C           | 183.098  | 170.0806 | 136.3518 | 176.3999 | 120.9877 | 80.23165 | -0.37447 | 149.5289 | 124.6762 |
| YMR302C           | 1772.251 | 1806.611 | 1781.466 | 1634.162 | 1519.836 | 1657.468 | -0.15585 | 1614.462 | 1478.554 |
| YMR062C           | 923.5511 | 789.0947 | 765.744  | 743.2078 | 719.0124 | 704.473  | -0.19391 | 806.107  | 812.151  |
| YPR003C           | 306.3149 | 302.5852 | 263.8112 | 344.7409 | 267.3251 | 244.6087 | -0.02676 | 242.8439 | 385.4425 |

|           |           |           |           |           |           |           |           |           |           |
|-----------|-----------|-----------|-----------|-----------|-----------|-----------|-----------|-----------|-----------|
| YLL064C   | 1. 15156  | 1. 977681 | 1. 976114 | 0         | 0         | 3. 913739 | -0. 38346 | 0         | 0         |
| YMR008C   | 4739. 821 | 5556. 294 | 4900. 762 | 4874. 727 | 4868. 313 | 4828. 575 | -0. 06061 | 4371. 191 | 4866. 76  |
| YBR249C   | 12041. 86 | 10578. 61 | 11295. 47 | 11845. 66 | 11228. 81 | 10929. 12 | 0. 003723 | 11696. 98 | 10513. 18 |
| YGL092W   | 1868. 982 | 1927. 25  | 1972. 161 | 1909. 059 | 1987. 654 | 2505. 771 | 0. 150462 | 1924. 763 | 2279. 291 |
| YPL109C   | 186. 5527 | 140. 4153 | 197. 6114 | 139. 6872 | 109. 465  | 115. 4553 | -0. 52482 | 110. 1792 | 130. 8222 |
| YER182W   | 1075. 557 | 1088. 713 | 1057. 221 | 947. 366  | 819. 2593 | 771. 985  | -0. 34369 | 1236. 705 | 1122. 963 |
| YPR181C   | 5213. 112 | 5785. 705 | 5670. 458 | 5541. 823 | 5724. 445 | 6254. 155 | 0. 071846 | 5511. 208 | 6086. 303 |
| YOR021C   | 2070. 505 | 1875. 83  | 1892. 129 | 2135. 603 | 1933. 498 | 2022. 425 | 0. 061215 | 2118. 139 | 1995. 696 |
| YCR105W   | 173. 8856 | 194. 8016 | 175. 8741 | 154. 0141 | 177. 4486 | 176. 1182 | -0. 10146 | 204. 6185 | 199. 3062 |
| YDL076C   | 833. 7294 | 776. 2397 | 710. 4129 | 823. 7965 | 810. 0412 | 921. 6855 | 0. 139256 | 763. 3844 | 755. 0809 |
| YPR093C   | 366. 1961 | 400. 4804 | 268. 7515 | 290. 1197 | 293. 8272 | 251. 4577 | -0. 30968 | 381. 1301 | 299. 3984 |
| YPR084W   | 274. 0713 | 335. 2169 | 270. 7276 | 298. 1785 | 273. 0864 | 273. 9617 | -0. 05819 | 291. 1879 | 293. 2524 |
| YGL110C   | 743. 9077 | 720. 8647 | 717. 3293 | 640. 2332 | 753. 5803 | 673. 1631 | -0. 0782  | 721. 7861 | 747. 1789 |
| YIR004W   | 1545. 393 | 1380. 421 | 1591. 76  | 1576. 854 | 1355. 062 | 1612. 46  | 0. 008534 | 1567. 243 | 1456. 604 |
| YNL096C   | 14024. 85 | 12592. 88 | 12292. 41 | 13906. 94 | 13995. 39 | 12547. 45 | 0. 055985 | 16496. 52 | 14309. 66 |
| YOR256C   | 879. 7918 | 802. 9384 | 932. 7256 | 896. 3265 | 918. 354  | 985. 2838 | 0. 098346 | 744. 2717 | 892. 0491 |
| YPL039W   | 386. 9241 | 449. 9224 | 428. 8167 | 479. 0556 | 452. 8395 | 441. 2741 | 0. 117616 | 457. 5809 | 472. 3646 |
| YOR047C   | 601. 1143 | 629. 8914 | 587. 8938 | 626. 8017 | 686. 749  | 671. 2062 | 0. 125897 | 532. 9075 | 574. 2127 |
| YBL048W   | 54. 12332 | 49. 44202 | 37. 54616 | 49. 24871 | 41. 48148 | 44. 02956 | -0. 06645 | 37. 10116 | 62. 33808 |
| YLR378C   | 6223. 03  | 5625. 513 | 5564. 736 | 6037. 891 | 5844. 28  | 5495. 868 | -0. 00292 | 6752. 411 | 5992. 357 |
| YLR287C   | 1275. 928 | 1245. 939 | 1274. 593 | 1421. 944 | 1319. 342 | 1488. 199 | 0. 155827 | 1308. 659 | 1368. 804 |
| YER104W   | 461. 7755 | 366. 8598 | 354. 7124 | 333. 1003 | 336. 4609 | 385. 5033 | -0. 16554 | 405. 8642 | 356. 4684 |
| YOR190W   | 76. 00296 | 76. 14071 | 53. 35507 | 55. 51672 | 44. 93828 | 37. 18052 | -0. 57828 | 57. 33815 | 66. 72808 |
| YLR207W   | 895. 9136 | 856. 3358 | 980. 1524 | 928. 562  | 1011. 687 | 1213. 259 | 0. 206788 | 914. 0376 | 937. 7051 |
| YGR199W   | 748. 514  | 862. 2689 | 916. 9167 | 908. 8625 | 937. 9425 | 875. 6991 | 0. 107109 | 757. 763  | 834. 979  |
| YOR302W   | 36. 84992 | 60. 31927 | 49. 40284 | 39. 39897 | 51. 85186 | 58. 70608 | 0. 032938 | 29. 23121 | 58. 82607 |
| YJR088C   | 772. 6967 | 884. 0233 | 973. 236  | 891. 8493 | 873. 4157 | 1028. 335 | 0. 087087 | 957. 8844 | 932. 4371 |
| YBR180W   | 42. 60772 | 55. 37506 | 55. 33118 | 33. 13095 | 58. 76544 | 46. 96487 | -0. 14285 | 44. 9711  | 35. 12004 |
| YJL065C   | 84. 06388 | 67. 24115 | 83. 98483 | 64. 47103 | 74. 89713 | 52. 83547 | -0. 2918  | 95. 56359 | 75. 50809 |
| YGL062W   | 5142. 867 | 6203. 985 | 5575. 605 | 4293. 592 | 4242. 634 | 4431. 331 | -0. 38403 | 4330. 717 | 4698. 184 |
| YIL087C   | 1127. 377 | 1070. 914 | 1185. 668 | 1143. 465 | 1174. 156 | 906. 0305 | -0. 07002 | 1538. 012 | 1175. 643 |
| YLR152C   | 409. 9553 | 485. 5207 | 356. 6885 | 347. 4272 | 345. 679  | 318. 9697 | -0. 30711 | 375. 5087 | 372. 2725 |
| YJR053W   | 102. 4888 | 117. 672  | 175. 8741 | 171. 0273 | 168. 2305 | 304. 2932 | 0. 700427 | 97. 81214 | 206. 3303 |
| YPL030W   | 800. 3342 | 827. 6594 | 788. 4693 | 848. 8686 | 906. 8313 | 1050. 839 | 0. 215895 | 752. 1416 | 796. 347  |
| YJR102C   | 586. 144  | 482. 5541 | 446. 6017 | 439. 6566 | 452. 8395 | 419. 7485 | -0. 20757 | 541. 9017 | 408. 2705 |
| YMR158W-I | 0         | 0. 98884  | 0         | 0         | 2. 304527 | 0         | 1. 220661 | 0         | 0. 878001 |
| YCL046W   | 19. 57652 | 8. 899564 | 3. 952227 | 3. 581724 | 5. 761317 | 7. 827478 | -0. 91732 | 8. 99422  | 2. 634003 |
| YGL238W   | 1870. 133 | 1764. 091 | 2037. 373 | 1960. 994 | 2004. 938 | 2386. 402 | 0. 163532 | 2009. 084 | 2029. 938 |
| YDL064W   | 1576. 486 | 1209. 352 | 1318. 068 | 1482. 834 | 1620. 082 | 1336. 542 | 0. 113386 | 1774. 11  | 1481. 188 |
| YDR207C   | 899. 3683 | 896. 8783 | 998. 9255 | 933. 9346 | 1034. 733 | 1127. 157 | 0. 147386 | 802. 7341 | 956. 1432 |
| YHR129C   | 285. 5869 | 328. 295  | 350. 7602 | 293. 7014 | 299. 5885 | 279. 8323 | -0. 14381 | 351. 8989 | 321. 3484 |
| YIL144W   | 578. 0831 | 506. 2863 | 662. 9861 | 608. 8931 | 663. 7038 | 845. 3676 | 0. 277505 | 587. 9971 | 712. 0589 |
| YER122C   | 3893. 424 | 3575. 647 | 3888. 004 | 4045. 557 | 4072. 099 | 4759. 106 | 0. 181179 | 3722. 483 | 3758. 723 |
| YLR293C   | 18100. 22 | 16185. 34 | 15917. 6  | 17682. 08 | 17345. 02 | 15743. 99 | 0. 016229 | 19357. 81 | 16680. 26 |
| YPL102C   | 0         | 0. 98884  | 1. 976114 | 0         | 0         | 0. 978435 | -1. 59946 | 0         | 1. 756002 |
| YPR109W   | 467. 5333 | 554. 7395 | 479. 2076 | 456. 6698 | 451. 6873 | 419. 7485 | -0. 17702 | 519. 4162 | 460. 0726 |
| YBR109W-I | 1. 15156  | 4. 944202 | 12. 84474 | 3. 581724 | 8. 065844 | 8. 805912 | 0. 110872 | 2. 248555 | 11. 41401 |
| YCL044C   | 1092. 83  | 1208. 363 | 1233. 095 | 1241. 067 | 1204. 115 | 1174. 122 | 0. 034293 | 1088. 301 | 1156. 327 |
| YDR283C   | 725. 4828 | 710. 9763 | 730. 174  | 685. 9002 | 812. 3457 | 873. 7422 | 0. 130642 | 613. 8555 | 672. 5488 |
| YDL063C   | 1564. 97  | 1529. 736 | 1582. 867 | 1732. 659 | 2018. 766 | 2053. 734 | 0. 311575 | 1792. 098 | 1769. 172 |
| YGL173C   | 4207. 8   | 3732. 873 | 4019. 415 | 4048. 244 | 4172. 346 | 4659. 306 | 0. 106893 | 4371. 191 | 4274. 987 |
| YOR155C   | 749. 6655 | 869. 1907 | 742. 0307 | 715. 4494 | 672. 9219 | 749. 481  | -0. 14317 | 652. 0809 | 734. 8869 |
| YLR081W   | 50. 66864 | 62. 29695 | 77. 06843 | 57. 30759 | 46. 09054 | 54. 79234 | -0. 2646  | 71. 95376 | 69. 36208 |
| YGR222W   | 633. 358  | 611. 1034 | 633. 3444 | 617. 8474 | 636. 0494 | 648. 7022 | 0. 018924 | 593. 6185 | 562. 7987 |

|                   |           |           |           |           |           |           |           |           |           |
|-------------------|-----------|-----------|-----------|-----------|-----------|-----------|-----------|-----------|-----------|
| YML007C- <i>f</i> | 5. 7578   | 12. 85493 | 3. 952227 | 8. 058879 | 9. 218108 | 7. 827478 | 0. 15386  | 6. 745665 | 7. 90201  |
| YIRO36W- <i>f</i> | 0         | 1. 977681 | 0. 988057 |           | 0         | 1. 152263 | 0. 978435 | -0. 47706 | 0         |
| YKL111C           | 0         | 0. 98884  |           | 0         | 0. 895431 | 1. 152263 |           | 0         | 1. 050191 |
| YCRO49C           | 0         |           | 0         | 2. 96417  |           | 0         | 1. 956869 | -0. 59908 | 0         |
| YER037W           | 223. 4026 | 263. 0316 | 292. 4648 | 282. 9562 | 236. 214  | 298. 4226 | 0. 069946 | 279. 9451 | 285. 3503 |
| YIL095W           | 520. 5051 | 465. 7438 | 586. 9058 | 467. 415  | 464. 3622 | 644. 7885 | 0. 003125 | 505. 9249 | 579. 4807 |
| YDL082W           | 23063. 44 | 20692. 47 | 20949. 77 | 22603. 37 | 22116. 55 | 21161. 59 | 0. 025981 | 24030. 31 | 21619. 02 |
| YNL212W           | 1167. 682 | 1188. 586 | 1291. 39  | 1203. 459 | 1168. 395 | 1425. 579 | 0. 058054 | 1274. 931 | 1237. 982 |
| YPL238C           | 1. 15156  |           | 0         | 0. 988057 |           | 0         | 0. 978435 | -1. 1288  | 1. 124277 |
| YDL047W           | 1567. 273 | 1976. 692 | 1764. 669 | 1739. 822 | 1706. 502 | 1418. 73  | -0. 12588 | 1666. 179 | 1789. 366 |
| YLR299W           | 613. 7814 | 622. 9695 | 662. 9861 | 554. 2718 | 577. 284  | 528. 3547 | -0. 19469 | 525. 0376 | 612. 8447 |
| YCRO95C           | 389. 2273 | 422. 2349 | 452. 53   | 447. 7155 | 373. 3334 | 392. 3523 | -0. 05893 | 395. 7457 | 354. 7124 |
| YLR302C           | 0         | 1. 977681 | 1. 976114 |           | 0         | 4. 609054 |           | 0         | 0. 221233 |
| YER057C           | 3051. 634 | 2554. 175 | 2641. 076 | 2766. 882 | 2745. 844 | 2552. 736 | -0. 03209 | 3083. 893 | 2762. 191 |
| YPR016W- <i>f</i> | 69. 0936  | 75. 15187 | 66. 19981 | 45. 66698 | 51. 85186 | 62. 61982 | -0. 39412 | 83. 19653 | 66. 72808 |
| YJL049W           | 400. 7429 | 446. 9559 | 436. 7211 | 363. 545  | 427. 4897 | 420. 7269 | -0. 08401 | 382. 2543 | 379. 2965 |
| YNL241C           | 4593. 573 | 5216. 133 | 4322. 749 | 4606. 993 | 4161. 976 | 3675. 979 | -0. 18345 | 4380. 185 | 3978. 223 |
| YNR071C           | 79. 45764 | 63. 28579 | 110. 6624 | 76. 11164 | 66. 83128 | 74. 36104 | -0. 22174 | 93. 31503 | 86. 92211 |
| YPR169W           | 1898. 922 | 2062. 721 | 1979. 078 | 2452. 586 | 2564. 938 | 2384. 445 | 0. 317271 | 2206. 957 | 2152. 859 |
| YOR151C           | 2781. 017 | 2505. 722 | 3052. 108 | 2832. 248 | 2956. 708 | 3753. 276 | 0. 194479 | 2754. 48  | 3184. 51  |
| YBR006W           | 893. 6105 | 1112. 445 | 1046. 352 | 893. 6402 | 841. 1523 | 891. 354  | -0. 217   | 1178. 243 | 1009. 701 |
| YOR123C           | 1985. 289 | 1914. 395 | 1861. 499 | 2106. 949 | 2251. 523 | 2094. 829 | 0. 163672 | 2068. 671 | 1964. 966 |
| YJR159W           | 6. 90936  | 9. 888404 | 11. 85668 | 8. 95431  | 11. 52263 |           | 0         | -0. 48476 | 13. 49133 |
| YPR198W           | 464. 0787 | 501. 3421 | 414. 9839 | 432. 4932 | 409. 0535 | 324. 8403 | -0. 24304 | 339. 5318 | 381. 0525 |
| YLR090W           | 814. 1529 | 1054. 104 | 845. 7766 | 769. 1753 | 806. 5844 | 744. 5888 | -0. 2261  | 839. 8353 | 757. 7149 |
| YOL088C           | 931. 612  | 913. 6886 | 908. 0242 | 895. 431  | 980. 5762 | 859. 0657 | -0. 0096  | 991. 6127 | 887. 6591 |
| YLR336C           | 1026. 04  | 1217. 263 | 1276. 569 | 1455. 971 | 1496. 79  | 1744. 549 | 0. 416312 | 1280. 552 | 1377. 584 |
| YLR023C           | 1178. 046 | 1410. 086 | 1364. 506 | 1072. 726 | 1149. 959 | 1260. 224 | -0. 18252 | 1201. 853 | 1109. 793 |
| YAL011W           | 535. 4754 | 495. 4091 | 497. 9806 | 462. 9378 | 515. 0618 | 518. 5704 | -0. 0308  | 455. 3324 | 472. 3646 |
| YMR095C           | 73. 69984 | 77. 12955 | 91. 88928 | 81. 48422 | 86. 41976 | 128. 1749 | 0. 286697 | 95. 56359 | 126. 4322 |
| YDR105C           | 719. 725  | 815. 7934 | 714. 3651 | 745. 894  | 729. 3828 | 665. 3356 | -0. 07183 | 704. 922  | 654. 9888 |
| YER038C           | 105. 9435 | 179. 969  | 241. 0859 | 169. 2365 | 131. 358  | 217. 2125 | -0. 02538 | 147. 2803 | 126. 4322 |
| YMR216C           | 1032. 949 | 1422. 941 | 1242. 975 | 1212. 414 | 1223. 704 | 1311. 103 | 0. 018738 | 1295. 168 | 1276. 614 |
| YHR168W           | 287. 89   | 353. 016  | 388. 3063 | 367. 1267 | 376. 7902 | 279. 8323 | -0. 00768 | 360. 8931 | 325. 7384 |
| YER157W           | 627. 6002 | 614. 0699 | 618. 5236 | 639. 3378 | 604. 9383 | 765. 1359 | 0. 111321 | 625. 0983 | 636. 5508 |
| YLR307C- <i>f</i> | 4. 60624  | 3. 955362 | 6. 916398 |           | 0         | 0         | 3. 913739 | -1. 9836  | 6. 745665 |
| YCRO31C           | 35902. 18 | 27871. 46 | 30930. 13 | 33221. 39 | 32604. 45 | 30599. 57 | 0. 025991 | 40966. 42 | 31738. 86 |
| YMR308C           | 4048. 885 | 4437. 916 | 4272. 358 | 4629. 378 | 4950. 124 | 5385. 305 | 0. 230041 | 4428. 529 | 4477. 805 |
| YFL018C           | 5208. 506 | 5411. 924 | 5466. 918 | 5354. 678 | 5065. 35  | 5382. 369 | -0. 02578 | 5637. 127 | 5347. 027 |
| YNL150W           | 1. 15156  | 1. 977681 | 0. 988057 | 10. 74517 | 2. 304527 | 4. 892174 | 2. 123561 | 5. 621387 | 4. 390005 |
| YIL079C           | 916. 6417 | 1150. 021 | 998. 9255 | 1027. 955 | 970. 2058 | 896. 2462 | -0. 0829  | 861. 1965 | 971. 0692 |
| YCL038C           | 289. 0415 | 420. 2572 | 323. 0946 | 316. 9826 | 316. 8725 | 244. 6087 | -0. 23294 | 326. 0405 | 335. 3964 |
| YKR095W- <i>f</i> | 413. 41   | 381. 6924 | 416. 96   | 373. 3947 | 377. 9424 | 367. 8915 | -0. 11496 | 493. 5578 | 423. 1965 |
| YBR134W           | 3. 45468  | 0. 98884  |           | 0         | 4. 477155 |           | 0         | 0. 978435 | 0. 296032 |
| YML024W           | 22357. 54 | 17788. 25 | 20389. 54 | 21339. 91 | 21210. 87 | 20184. 13 | 0. 051491 | 25271. 51 | 20364. 36 |
| YGL113W           | 588. 4471 | 562. 6502 | 661. 9981 | 635. 756  | 676. 3787 | 718. 1711 | 0. 163242 | 555. 3931 | 565. 4327 |
| YJR015W           | 552. 7488 | 670. 4338 | 578. 0132 | 595. 4616 | 595. 7202 | 576. 298  | -0. 02726 | 583. 5    | 575. 9687 |
| YMR067C           | 870. 5793 | 779. 2063 | 897. 1556 | 929. 4574 | 904. 5268 | 894. 2893 | 0. 099223 | 852. 2023 | 942. 9732 |
| YDR296W           | 1472. 845 | 1612. 799 | 1690. 565 | 1612. 671 | 1546. 338 | 1306. 21  | -0. 09714 | 2007. 96  | 1665. 568 |
| YOR249C           | 276. 3744 | 329. 2839 | 330. 999  | 253. 407  | 300. 7408 | 362. 9993 | -0. 03037 | 297. 9335 | 316. 9584 |
| YML017W           | 580. 3862 | 564. 6279 | 553. 3118 | 553. 3764 | 622. 2223 | 642. 8316 | 0. 09858  | 517. 1676 | 652. 3548 |
| YNL262W           | 731. 2406 | 604. 1815 | 664. 9622 | 672. 4687 | 614. 1564 | 862. 9794 | 0. 103794 | 558. 7659 | 794. 591  |
| YLR415C           | 2. 30312  | 1. 977681 | 0. 988057 | 3. 581724 | 1. 152263 | 1. 956869 | 0. 344701 | 2. 248555 | 2. 634003 |
| YLR085C           | 579. 2346 | 677. 3557 | 639. 2728 | 610. 684  | 555. 391  | 585. 104  | -0. 11453 | 545. 2746 | 607. 5767 |

|           |          |          |          |          |          |          |          |          |          |
|-----------|----------|----------|----------|----------|----------|----------|----------|----------|----------|
| YNR032C-1 | 301.7087 | 338.1834 | 251.9545 | 326.8323 | 326.0906 | 297.4442 | 0.091689 | 433.9711 | 399.4905 |
| YPL087W   | 1508.544 | 1557.424 | 1566.07  | 1465.821 | 1450.7   | 1331.65  | -0.12481 | 1690.913 | 1482.066 |
| YPL176C   | 1318.536 | 1291.426 | 1348.698 | 1310.911 | 1321.646 | 1611.482 | 0.100426 | 1209.723 | 1244.128 |
| YBR041W   | 819.9107 | 1032.349 | 965.3315 | 950.0523 | 1033.58  | 1061.602 | 0.112091 | 853.3266 | 949.9972 |
| YJR058C   | 625.297  | 539.9069 | 551.3357 | 520.2454 | 646.4198 | 524.441  | -0.02154 | 600.3642 | 520.6546 |
| YML026C   | 29945.16 | 24543.02 | 28464.93 | 28994.95 | 29056.63 | 28681.84 | 0.064292 | 33024.53 | 28938.92 |
| YLL048C   | 2913.447 | 2777.653 | 3040.251 | 3101.773 | 3292.017 | 3909.825 | 0.238874 | 3219.931 | 3518.15  |
| YDR180W   | 389.2273 | 288.7414 | 383.366  | 317.878  | 382.5515 | 495.088  | 0.171755 | 363.1416 | 417.0505 |
| YOL023W   | 450.2599 | 630.8802 | 586.9058 | 511.2911 | 444.7737 | 513.6782 | -0.1826  | 466.5752 | 569.8227 |
| YHL013C   | 878.6402 | 746.5745 | 828.9797 | 933.9346 | 798.5186 | 939.2973 | 0.122536 | 779.1243 | 751.5689 |
| YNR023W   | 649.4798 | 627.9137 | 718.3173 | 691.2728 | 728.2305 | 729.9123 | 0.107042 | 535.1561 | 632.1608 |
| YLR264C-1 | 3309.583 | 2509.677 | 2443.465 | 2916.419 | 2995.885 | 2712.221 | 0.061827 | 3968.699 | 3057.2   |
| YPL194W   | 328.1946 | 266.9869 | 246.0261 | 258.7796 | 265.0206 | 295.4873 | -0.03809 | 224.8555 | 292.3744 |
| YDL120W   | 1099.74  | 1031.361 | 1026.591 | 1091.53  | 989.7943 | 829.7126 | -0.11734 | 1289.546 | 976.3372 |
| YBR030W   | 1030.646 | 1182.653 | 959.4032 | 976.9152 | 989.7943 | 922.6639 | -0.13496 | 981.4942 | 889.4151 |
| YJR055W   | 263.7072 | 307.5294 | 252.9425 | 233.7075 | 223.5391 | 281.7892 | -0.15731 | 259.7081 | 217.7443 |
| YOR296W   | 541.2332 | 605.1703 | 625.44   | 607.9977 | 568.0659 | 723.0633 | 0.100085 | 635.2168 | 559.2867 |
| YGR257C   | 819.9107 | 868.2019 | 827.9916 | 939.3071 | 743.2099 | 798.4027 | -0.02032 | 935.3989 | 876.2451 |
| YGR108W   | 853.3059 | 886.9899 | 951.4987 | 933.0391 | 921.8108 | 1068.451 | 0.11903  | 740.8989 | 835.857  |
| YKL077W   | 3194.427 | 3029.807 | 3336.668 | 3450.096 | 3548.971 | 3504.753 | 0.135695 | 3387.448 | 3234.556 |
| YNR068C   | 64.48736 | 94.92868 | 94.85346 | 55.51672 | 51.85186 | 67.512   | -0.53999 | 70.82948 | 76.38609 |
| YLR308W   | 4.60624  | 1.977681 | 0        | 3.581724 | 4.609054 | 2.935304 | 0.756927 | 0        | 4.390005 |
| YOR188W   | 1574.182 | 1349.767 | 1673.768 | 1711.169 | 1762.963 | 2296.386 | 0.327783 | 1303.038 | 1741.954 |
| YEL020C   | 610.3268 | 685.2664 | 578.0132 | 514.8728 | 535.8025 | 593.9099 | -0.18809 | 573.3815 | 535.5807 |
| YJR111C   | 614.933  | 682.2999 | 554.2999 | 527.4089 | 540.4116 | 557.7078 | -0.18781 | 627.3468 | 537.3367 |
| YJL056C   | 460.624  | 474.6434 | 446.6017 | 444.1338 | 440.1646 | 530.3116 | 0.033783 | 377.7572 | 374.9065 |
| YMR301C   | 1050.223 | 1269.671 | 1141.206 | 1191.819 | 1317.037 | 1014.637 | 0.025776 | 1128.775 | 1094.867 |
| YGL111W   | 2406.76  | 2651.081 | 2463.226 | 2945.968 | 2691.687 | 2811.043 | 0.167792 | 2651.046 | 2620.833 |
| YGR045C   | 2.30312  | 8.899564 | 2.96417  | 1.790862 | 3.45679  | 1.956869 | -0.97554 | 5.621387 | 2.634003 |
| YNL163C   | 1183.804 | 1277.582 | 1239.023 | 1347.624 | 1403.457 | 1622.245 | 0.241046 | 1151.26  | 1410.948 |
| YJL135W   | 0        | 1.977681 | 0        | 5.372586 | 1.152263 | 5.870608 | 2.64793  | 2.248555 | 5.268006 |
| YJL148W   | 3818.573 | 3975.139 | 3550.088 | 4153.905 | 4057.12  | 4013.539 | 0.107879 | 4402.671 | 4066.023 |
| YGR204C-1 | 1.15156  | 0.98884  | 5.928341 | 1.790862 | 1.152263 | 3.913739 | -0.23479 | 2.248555 | 2.634003 |
| YGR224W   | 168.1278 | 145.3595 | 175.8741 | 137.0009 | 131.358  | 157.528  | -0.20043 | 100.0607 | 166.8202 |
| YOL009C   | 304.0118 | 276.8753 | 245.0381 | 231.0212 | 273.0864 | 271.0264 | -0.09157 | 257.4595 | 302.0324 |
| YJL177W   | 25981.5  | 21180.96 | 23553.3  | 25331.74 | 24540.91 | 23242.72 | 0.048143 | 27896.7  | 23883.39 |
| YDL010W   | 147.3997 | 134.4823 | 125.4832 | 135.2101 | 125.5967 | 101.7572 | -0.16809 | 96.68786 | 151.8942 |
| YJR156C   | 29.94056 | 61.30811 | 65.21175 | 55.51672 | 55.30865 | 27.39617 | -0.17882 | 56.21387 | 36.87605 |
| YDR470C   | 484.8067 | 379.7147 | 395.2227 | 428.016  | 442.4692 | 422.6838 | 0.03778  | 437.3439 | 493.4366 |
| YOR350C   | 332.8008 | 363.8933 | 310.2498 | 296.3877 | 335.3087 | 257.3283 | -0.17969 | 275.448  | 295.0084 |
| YAL066W   | 0        | 5.933043 | 3.952227 | 0.895431 | 0        | 0        | -3.46463 | 0        | 0        |
| YMR156C   | 238.3729 | 192.8239 | 134.3757 | 174.6091 | 188.9712 | 161.4417 | -0.10733 | 202.3699 | 178.2342 |
| YLL036C   | 982.2806 | 1144.088 | 1055.245 | 1066.458 | 1140.741 | 1164.337 | 0.083648 | 984.8671 | 1122.085 |
| YDR496C   | 2426.337 | 2641.193 | 2770.511 | 3101.773 | 3186.008 | 3772.844 | 0.360155 | 2837.676 | 3213.484 |
| YLR422W   | 647.1767 | 663.5119 | 778.5888 | 620.5337 | 608.3951 | 745.5673 | -0.08152 | 662.1994 | 693.6208 |
| YGL078C   | 4275.742 | 4912.559 | 4662.64  | 5469.293 | 5337.284 | 5603.496 | 0.244598 | 4977.176 | 5392.683 |
| YBL059C-1 | 580.3862 | 522.1077 | 540.4671 | 421.748  | 512.7572 | 481.3899 | -0.21458 | 683.5607 | 590.0167 |
| YDR198C   | 449.1084 | 482.5541 | 454.5061 | 499.6505 | 473.5803 | 586.0824 | 0.169808 | 508.1734 | 462.7066 |
| YER034W   | 703.6031 | 673.4003 | 639.2728 | 694.8545 | 625.6791 | 592.9314 | -0.07551 | 636.3411 | 657.6228 |
| YDR203W   | 0        | 1.977681 | 0        | 0        | 0        | 0.978435 | -1.01526 | 0        | 0.878001 |
| YNL068C   | 1204.532 | 1068.937 | 1306.211 | 1312.702 | 1312.428 | 1480.372 | 0.197728 | 1007.353 | 1226.568 |
| YJL162C   | 384.621  | 412.3465 | 450.5539 | 483.5328 | 412.5103 | 564.5568 | 0.227496 | 440.7168 | 465.3406 |
| YOR132W   | 1594.911 | 1380.421 | 1492.954 | 1394.186 | 1444.938 | 1453.954 | -0.05771 | 1551.503 | 1430.264 |
| YNL097C   | 726.6343 | 620.9918 | 738.0784 | 659.9327 | 616.461  | 638.9179 | -0.12296 | 652.0809 | 680.4508 |



|                   |          |          |          |          |          |          |          |          |          |
|-------------------|----------|----------|----------|----------|----------|----------|----------|----------|----------|
| YBL036C           | 1959.955 | 2048.877 | 1887.189 | 2056.805 | 2009.547 | 2109.505 | 0.066898 | 2289.029 | 1967.6   |
| YGL120C           | 3811.663 | 4072.045 | 4169.6   | 4735.039 | 4922.47  | 5065.357 | 0.288629 | 4006.925 | 4457.611 |
| YOR329W- <i>f</i> | 0        | 0.98884  | 0        | 0        | 0        | 0        | #NUM!    | 1.124277 | 0        |
| YML031W           | 1995.653 | 1941.094 | 1790.359 | 2046.06  | 1998.025 | 1874.681 | 0.04749  | 1808.962 | 1907.896 |
| YBR052C           | 4674.182 | 3583.558 | 4136.006 | 3641.718 | 3461.399 | 3352.117 | -0.24539 | 4737.705 | 4121.337 |
| YMR294W           | 620.6908 | 555.7283 | 602.7147 | 616.0565 | 607.2428 | 600.7589 | 0.035977 | 632.9682 | 594.4067 |
| YDR463W           | 1417.57  | 1386.354 | 1476.157 | 1424.631 | 1590.124 | 1573.323 | 0.100251 | 1423.335 | 1518.064 |
| YGL099W           | 1828.677 | 1827.377 | 1825.929 | 2154.407 | 2011.852 | 2036.123 | 0.178124 | 1759.494 | 2072.083 |
| YHR099W           | 2026.745 | 1858.031 | 2199.414 | 1968.157 | 2060.247 | 2424.561 | 0.084897 | 1762.867 | 2165.151 |
| YDR282C           | 183.098  | 213.5895 | 172.9099 | 143.269  | 146.3375 | 182.9673 | -0.2694  | 202.3699 | 195.7942 |
| YKL134C           | 409.9553 | 433.1121 | 504.897  | 413.6891 | 451.6873 | 419.7485 | -0.06887 | 378.8815 | 431.9765 |
| YGR217W           | 536.6269 | 508.264  | 697.5681 | 625.9063 | 608.3951 | 733.826  | 0.175699 | 568.8844 | 566.3107 |
| YIL007C           | 513.5957 | 506.2863 | 502.9209 | 456.6698 | 396.3786 | 342.4522 | -0.34911 | 514.9191 | 428.4645 |
| YNL218W           | 465.2302 | 519.1412 | 511.8134 | 433.3886 | 503.5391 | 616.4139 | 0.054087 | 360.8931 | 471.4866 |
| YBR020W           | 142.7934 | 122.6162 | 100.7818 | 100.2883 | 99.09466 | 66.53356 | -0.46162 | 113.552  | 86.92211 |
| YDR162C           | 743.9077 | 752.5076 | 816.1349 | 693.959  | 705.1852 | 705.4514 | -0.13594 | 738.6503 | 743.6669 |
| YLR279W           | 26.48588 | 34.60942 | 20.74919 | 27.75836 | 20.74074 | 27.39617 | -0.10888 | 34.8526  | 21.07203 |
| YMR215W           | 4407.02  | 4201.583 | 4491.706 | 4481.632 | 4925.926 | 4701.379 | 0.107008 | 4390.304 | 4266.207 |
| YHL034W- <i>f</i> | 31.09212 | 45.48666 | 18.77308 | 24.17664 | 23.04527 | 32.28835 | -0.26212 | 32.60405 | 31.60804 |
| YKL045W           | 1005.312 | 832.6036 | 1056.233 | 993.9284 | 950.6174 | 1197.604 | 0.118613 | 942.1445 | 921.9011 |
| YCR054C           | 317.8305 | 325.3285 | 354.7124 | 336.6821 | 377.9424 | 407.0288 | 0.168701 | 285.5665 | 361.7364 |
| YGR261C           | 1497.028 | 1308.236 | 1358.578 | 1462.239 | 1444.938 | 1540.056 | 0.094993 | 1466.058 | 1471.53  |
| YAL047W- <i>f</i> | 0        | 0        | 0        | 0.895431 | 0        | 0        | #DIV/0!  | 2.248555 | 0        |
| YHL048C- <i>f</i> | 0        | 0        | 0        | 0.895431 | 0        | 0        | #DIV/0!  | 2.248555 | 0        |
| YER146W           | 2.30312  | 0.98884  | 0        | 0        | 0        | 0        | #NUM!    | 0        | 0        |
| YLR123C           | 10.36404 | 5.933043 | 13.8328  | 15.22233 | 24.19753 | 6.849043 | 0.618848 | 20.23699 | 16.68202 |
| YER145C- <i>f</i> | 38.00148 | 26.69869 | 23.71336 | 8.95431  | 24.19753 | 22.504   | -0.66773 | 24.7341  | 22.82803 |
| YER087C- <i>f</i> | 20.72808 | 8.899564 | 14.82085 | 17.01319 | 13.82716 | 10.76278 | -0.09544 | 14.61561 | 7.90201  |
| YER183C           | 492.8677 | 383.6701 | 403.1272 | 556.0627 | 451.6873 | 441.2741 | 0.179315 | 525.0376 | 491.6806 |
| YDR130C           | 431.835  | 529.0296 | 523.6701 | 453.9835 | 448.2305 | 461.8212 | -0.12213 | 450.8353 | 479.3886 |
| YGR160W           | 0        | 1.977681 | 0        | 0        | 0        | 0.978435 | -1.01526 | 0        | 0        |
| YKL096C- <i>f</i> | 0        | 5.933043 | 2.96417  | 3.581724 | 1.152263 | 1.956869 | -0.41116 | 0        | 3.512004 |
| YGR020C           | 5293.721 | 4687.104 | 5179.394 | 5459.443 | 5173.663 | 5029.154 | 0.047002 | 6035.122 | 5128.404 |
| YOL043C           | 242.9791 | 306.5405 | 245.0381 | 254.3024 | 218.9301 | 256.3499 | -0.12308 | 251.8382 | 280.9603 |
| YGL235W           | 0        | 1.977681 | 0.988057 | 0        | 0        | 0        | #NUM!    | 0        | 0        |
| YDR118W- <i>f</i> | 3.45468  | 1.977681 | 0.988057 | 0.895431 | 2.304527 | 0.978435 | -0.61972 | 1.124277 | 3.512004 |
| YCR001W           | 25.33432 | 48.45318 | 35.57005 | 26.86293 | 35.72017 | 24.46087 | -0.32924 | 58.46243 | 36.87605 |
| YLR229C           | 1616.79  | 1552.479 | 1523.584 | 1438.062 | 1441.482 | 1422.644 | -0.12539 | 1857.306 | 1659.422 |
| YIR037W           | 4321.804 | 3485.663 | 3971     | 4016.008 | 3875.062 | 3427.457 | -0.05747 | 4566.815 | 3818.427 |
| YMR182W- <i>f</i> | 16.12184 | 30.65405 | 19.76114 | 20.59491 | 16.13169 | 13.69809 | -0.40003 | 17.98844 | 9.658012 |
| YKR095W           | 2017.533 | 1496.116 | 2166.809 | 2034.419 | 2142.058 | 2813.978 | 0.299379 | 2016.954 | 2446.989 |
| YHR100C           | 574.6284 | 482.5541 | 493.0404 | 579.3439 | 699.4239 | 462.7996 | 0.167911 | 617.2283 | 496.0706 |
| YBR206W           | 47.21396 | 24.72101 | 32.60588 | 30.44465 | 42.63375 | 29.35304 | -0.02941 | 50.59249 | 26.34003 |
| YDR401W           | 0        | 0        | 2.96417  | 0        | 0        | 0        | #NUM!    | 0        | 0        |
| YER039C- <i>f</i> | 25.33432 | 32.63173 | 47.42673 | 7.163448 | 14.97943 | 35.22365 | -0.8775  | 28.10694 | 22.82803 |
| YDL026W           | 0        | 1.977681 | 0.988057 | 1.790862 | 0        | 0.978435 | -0.09887 | 0        | 1.756002 |
| YJR043C           | 712.8156 | 775.2509 | 694.6039 | 820.2148 | 848.0659 | 887.4403 | 0.227636 | 847.7052 | 763.8609 |
| YOR055W           | 0        | 1.977681 | 1.976114 | 0        | 1.152263 | 0.978435 | -0.89191 | 0        | 1.756002 |
| YMR315W- <i>f</i> | 78.30608 | 80.09608 | 54.34313 | 37.6081  | 28.80659 | 31.30991 | -1.12233 | 49.46821 | 58.82607 |
| YOR003W           | 418.0163 | 504.3086 | 433.7569 | 431.5978 | 377.9424 | 331.6894 | -0.24886 | 511.5463 | 415.2945 |
| YOR291W           | 1000.706 | 896.8783 | 951.4987 | 937.5163 | 1011.687 | 1163.359 | 0.127605 | 937.6474 | 1044.821 |
| YDR326C           | 1792.979 | 1502.049 | 2193.486 | 2152.616 | 2483.128 | 3566.395 | 0.579585 | 1927.012 | 2642.783 |
| YGL164C           | 637.9642 | 600.2261 | 602.7147 | 641.1286 | 589.9589 | 635.0041 | 0.019605 | 599.2399 | 679.5728 |
| YNL069C           | 38535.8  | 29928.24 | 34942.63 | 38044.18 | 36681.16 | 33840.14 | 0.070236 | 42252.6  | 34918.1  |

|                   |          |          |          |          |          |            |          |          |          |
|-------------------|----------|----------|----------|----------|----------|------------|----------|----------|----------|
| YCR007C           | 213.0386 | 194.8016 | 166.9816 | 155.805  | 108.3128 | 114.4769   | -0.60246 | 204.6185 | 183.5022 |
| YMR222C           | 1159.621 | 1105.524 | 1161.955 | 1156.001 | 1011.687 | 924.6208   | -0.1483  | 1142.266 | 1086.965 |
| YLR120W- <i>f</i> | 4.60624  | 2.966521 | 0.988057 | 3.581724 | 2.304527 | 0.978435   | -0.31855 | 2.248555 | 5.268006 |
| YLR453C           | 118.6107 | 151.2926 | 150.1846 | 142.3735 | 89.87655 | 132.0887   | -0.20541 | 136.0376 | 134.3342 |
| YML012C- <i>f</i> | 11.5156  | 7.910723 | 20.74919 | 10.74517 | 4.609054 | 5.870608   | -0.92056 | 16.86416 | 12.29202 |
| YOR012W           | 84.06388 | 101.8506 | 90.90123 | 79.69336 | 80.65844 | 84.14539   | -0.17911 | 60.71098 | 93.94611 |
| YEL035C           | 8.06092  | 6.921883 | 3.952227 | 11.6406  |          | 0 1.956869 | -0.47772 | 5.621387 | 1.756002 |
| YKL038W           | 1121.619 | 1052.126 | 1114.528 | 916.0259 | 1032.428 | 1117.372   | -0.10105 | 924.1561 | 1148.425 |
| YJL136C           | 18466.42 | 14123.61 | 15459.14 | 16675.61 | 17827.82 | 17537.46   | 0.115135 | 20512.44 | 18675.96 |
| YDR303C           | 1178.046 | 1091.68  | 1152.074 | 1157.792 | 1175.309 | 1463.738   | 0.150044 | 1118.656 | 1243.25  |
| YPL262W           | 3743.721 | 3937.563 | 3734.855 | 3648.881 | 3691.852 | 3461.702   | -0.07972 | 3699.997 | 3484.786 |
| YDR281C           | 11.5156  | 25.70985 | 26.67753 | 22.38578 | 29.95885 | 29.35304   | 0.354412 | 25.85838 | 12.29202 |
| YNR062C           | 186.5527 | 151.2926 | 167.9697 | 168.341  | 223.5391 | 250.4793   | 0.344771 | 157.3988 | 219.5003 |
| YDL109C           | 156.6122 | 259.0762 | 240.0978 | 225.6486 | 182.0576 | 311.1422   | 0.132462 | 148.4046 | 251.1083 |
| YER007W           | 184.2496 | 202.7123 | 207.4919 | 195.204  | 208.5597 | 240.6949   | 0.116523 | 211.3642 | 189.6482 |
| YOL041C           | 2824.777 | 2905.213 | 2864.377 | 3329.213 | 3631.934 | 3662.281   | 0.305786 | 3384.075 | 3418.936 |
| YKL020C           | 1304.717 | 1417.997 | 1591.76  | 1404.931 | 1488.724 | 1861.961   | 0.140448 | 1269.309 | 1341.586 |
| YJL047C           | 520.5051 | 526.0631 | 511.8134 | 477.2647 | 503.5391 | 653.5944   | 0.068711 | 490.185  | 578.6027 |
| YDL246C           | 0        | 0        | 1.976114 | 0        | 0        | 0.978435   | -1.01412 | 2.248555 | 1.756002 |
| YCR069W           | 2205.237 | 2217.969 | 2244.865 | 2214.401 | 2207.737 | 1974.481   | -0.05996 | 2120.387 | 2063.303 |
| YNR028W           | 933.9151 | 930.4988 | 879.3706 | 870.359  | 1039.342 | 815.0361   | -0.01005 | 969.1272 | 951.7532 |
| YGL214W           | 1.15156  | 0.98884  | 0        | 0        | 2.304527 | 0          | 0.10659  | 0        | 0        |
| YBR274W           | 371.9539 | 418.2795 | 428.8167 | 378.7673 | 430.9465 | 451.0584   | 0.04855  | 413.7341 | 345.9324 |
| YFR054C           | 8.06092  | 2.966521 | 5.928341 | 7.163448 | 5.761317 | 3.913739   | -0.01001 | 5.621387 | 1.756002 |
| YDR285W           | 188.8558 | 146.3484 | 196.6233 | 195.204  | 163.6214 | 204.4929   | 0.082992 | 164.1445 | 221.2563 |
| YAL013W           | 1247.139 | 1262.749 | 1023.627 | 1280.466 | 1266.338 | 954.9523   | -0.01303 | 1224.338 | 1149.303 |
| YKR041W           | 0        | 36.5871  | 16.79697 | 20.59491 | 13.82716 | 15.65496   | -0.09226 | 6.745665 | 15.80402 |
| YIL156W           | 416.8647 | 438.0563 | 478.2195 | 376.081  | 407.9013 | 564.5568   | 0.016569 | 403.6156 | 537.3367 |
| YLR258W           | 3233.58  | 3411.499 | 3341.608 | 2616.449 | 2481.976 | 2313.998   | -0.43006 | 3005.194 | 2993.106 |
| YFL012W           | 1.15156  | 1.977681 | 0        | 5.372586 | 8.065844 | 0          | 2.10248  | 4.49711  | 2.634003 |
| YER153C           | 56.42644 | 79.10723 | 97.81763 | 76.11164 | 88.72429 | 74.36104   | 0.035696 | 64.08382 | 100.0921 |
| YCL024W           | 234.9182 | 325.3285 | 356.6885 | 334.8912 | 387.1605 | 499.9801   | 0.41439  | 254.0867 | 311.6904 |
| YER180C           | 336.2555 | 437.0675 | 417.948  | 430.7023 | 455.1441 | 472.584    | 0.189439 | 489.0607 | 438.1225 |
| YHR046C           | 475.5943 | 561.6614 | 517.7418 | 639.3378 | 619.9177 | 491.1742   | 0.170797 | 458.7052 | 505.7286 |
| YEL041W           | 252.1916 | 319.3955 | 333.9632 | 275.7928 | 247.7366 | 324.8403   | -0.0941  | 257.4595 | 331.8844 |
| YBL008W- <i>f</i> | 2.30312  | 0        | 0        | 0.895431 | 0        | 3.913739   | 1.062198 | 2.248555 | 0        |
| YGL084C           | 1030.646 | 995.7623 | 1031.531 | 937.5163 | 974.8149 | 917.7718   | -0.11171 | 1052.324 | 1029.895 |
| YMR237W           | 1974.925 | 1762.114 | 2004.767 | 1805.189 | 1910.453 | 2307.149   | 0.068928 | 1919.142 | 1911.408 |
| YPR167C           | 557.355  | 716.9093 | 662.9861 | 592.7753 | 560      | 559.6647   | -0.17796 | 513.7948 | 460.9506 |
| YDR319C           | 498.6255 | 403.4469 | 404.1152 | 445.0292 | 366.4198 | 344.409    | -0.1764  | 413.7341 | 420.5625 |
| YHR156C           | 219.9479 | 202.7123 | 192.6711 | 227.4395 | 216.6255 | 179.0536   | 0.018143 | 225.9798 | 190.5262 |
| YGR058W           | 576.9315 | 524.0854 | 565.1685 | 550.6901 | 653.3334 | 673.1631   | 0.172023 | 544.1503 | 610.2107 |
| YNL172W           | 284.4353 | 312.4736 | 350.7602 | 249.8253 | 276.5432 | 433.4466   | 0.018373 | 204.6185 | 410.0265 |
| YLR139C           | 574.6284 | 662.5231 | 638.2847 | 712.7631 | 667.1605 | 742.6319   | 0.178576 | 483.4393 | 760.3489 |
| YER158W- <i>f</i> | 2.30312  | 0.98884  | 0        | 0        | 3.45679  | 2.935304   | 0.957342 | 0        | 2.634003 |
| YDR081C           | 976.5228 | 1031.361 | 970.2718 | 1103.171 | 1090.041 | 1186.841   | 0.182627 | 943.2688 | 980.7272 |
| YJL044C           | 1188.41  | 1150.021 | 1218.274 | 1189.132 | 1234.074 | 1294.469   | 0.063859 | 1136.645 | 1264.322 |
| YMR316C- <i>f</i> | 4.60624  | 5.933043 | 2.96417  | 3.581724 | 2.304527 | 3.913739   | -0.46248 | 3.372832 | 7.024009 |
| YOR378W           | 141.6419 | 167.114  | 182.7905 | 111.9289 | 184.3622 | 198.6222   | 0.009848 | 124.7948 | 144.8702 |
| YOR080W           | 400.7429 | 413.3353 | 413.9958 | 345.6364 | 382.5515 | 500.9586   | 0.001259 | 438.4682 | 340.6644 |
| YOR170W           | 5.7578   | 3.955362 | 6.916398 | 6.268017 | 3.45679  | 6.849043   | -0.00484 | 2.248555 | 1.756002 |
| YJR045C           | 18831.46 | 19554.32 | 19491.4  | 18282.91 | 17955.72 | 18163.66   | -0.08933 | 18305.49 | 20335.38 |
| YLR383W           | 593.0534 | 510.2417 | 567.1446 | 577.553  | 622.2223 | 752.4163   | 0.224867 | 508.1734 | 575.0907 |
| YDR288W           | 523.9598 | 483.543  | 480.1956 | 478.1602 | 497.7778 | 499.9801   | -0.01147 | 525.0376 | 562.7987 |

|                   |          |          |          |          |          |          |          |          |          |
|-------------------|----------|----------|----------|----------|----------|----------|----------|----------|----------|
| YPR057W           | 625.297  | 584.4047 | 472.2912 | 571.285  | 521.9754 | 534.2254 | -0.04753 | 631.8439 | 544.3607 |
| YDR531W           | 1619.093 | 1712.672 | 1659.935 | 1715.646 | 1697.284 | 1754.333 | 0.049869 | 1605.468 | 1480.31  |
| YMR010W           | 865.9731 | 1062.015 | 972.2479 | 1035.118 | 1022.058 | 1183.906 | 0.160305 | 934.2746 | 913.9991 |
| YDR510C- <i>f</i> | 13.81872 | 14.83261 | 20.74919 | 17.90862 | 16.13169 | 8.805912 | -0.20536 | 22.48555 | 23.70603 |
| YLR184W           | 0        | 0        | 0        | 0.895431 | 2.304527 | 0.978435 | #DIV/0!  | 2.248555 | 0        |
| YER139C           | 556.2035 | 595.2819 | 529.5985 | 516.6637 | 565.7614 | 527.3763 | -0.06251 | 568.8844 | 485.5346 |
| YKR044W           | 870.5793 | 865.2354 | 740.0546 | 984.9741 | 781.2346 | 741.6535 | 0.018523 | 782.4971 | 792.835  |
| YER111C           | 712.8156 | 538.918  | 615.5594 | 701.1225 | 636.0494 | 882.5481 | 0.249429 | 658.8266 | 741.9109 |
| YOR174W           | 870.5793 | 788.1058 | 793.4096 | 832.7509 | 807.7367 | 697.624  | -0.06867 | 939.896  | 785.811  |
| YBR055C           | 909.7324 | 854.3581 | 920.869  | 898.1173 | 987.4898 | 1291.534 | 0.242829 | 935.3989 | 1007.945 |
| YPL209C           | 149.7028 | 99.87288 | 130.4235 | 89.5431  | 126.749  | 127.1965 | -0.14573 | 127.0434 | 104.4821 |
| YEL061C           | 799.1826 | 605.1703 | 819.0991 | 710.9722 | 907.9836 | 1153.575 | 0.318402 | 647.5838 | 934.1931 |
| YHL041W           | 0        | 2.966521 | 7.904455 | 2.686293 | 0        | 1.956869 | -1.2273  | 1.124277 | 1.756002 |
| YOL039W           | 35761.69 | 27551.07 | 31826.3  | 35033.74 | 35704.04 | 30255.16 | 0.086145 | 40581.92 | 32482.53 |
| YML035C           | 1220.654 | 1397.232 | 1570.022 | 1505.22  | 1389.63  | 1743.571 | 0.147404 | 1385.11  | 1559.33  |
| YEL030C- <i>f</i> | 1.15156  | 2.966521 | 1.976114 | 2.686293 | 1.152263 | 0        | -0.66687 | 0        | 1.756002 |
| YLR140W           | 14.97028 | 8.899564 | 6.916398 | 3.581724 | 12.6749  | 6.849043 | -0.41404 | 12.36705 | 13.17002 |
| YBR095C           | 665.6016 | 706.0321 | 644.2131 | 755.7438 | 744.3622 | 745.5673 | 0.155762 | 693.6792 | 719.9609 |
| YPR173C           | 3163.335 | 2895.325 | 3352.477 | 3273.696 | 3109.959 | 3155.452 | 0.019485 | 3135.61  | 3290.748 |
| YPL062W           | 11.5156  | 23.73217 | 19.76114 | 32.23552 | 19.58848 | 14.67652 | 0.2737   | 13.49133 | 27.21803 |
| YOR073W- <i>f</i> | 1.15156  | 0.98884  | 0.988057 | 0        | 0        | 3.913739 | 0.323096 | 0        | 1.756002 |
| YPR097W           | 1168.833 | 893.9118 | 1140.218 | 1037.805 | 1249.054 | 1544.948 | 0.258618 | 988.2399 | 1187.935 |
| YNL189W           | 3667.718 | 3432.265 | 3873.183 | 3804.686 | 3833.581 | 4291.415 | 0.120576 | 3897.87  | 3772.771 |
| YDR455C           | 1.15156  | 3.955362 | 4.940284 | 0.895431 | 4.609054 | 0.978435 | -0.63208 | 2.248555 | 2.634003 |
| YEL053C           | 726.6343 | 699.1102 | 815.1469 | 820.2148 | 762.7984 | 940.2758 | 0.171233 | 681.3122 | 722.5949 |
| YKR037C           | 626.4486 | 625.936  | 582.9535 | 646.5012 | 683.2922 | 578.2549 | 0.056052 | 580.1272 | 557.5307 |
| YMR239C           | 1125.074 | 1086.736 | 1098.719 | 1370.905 | 1370.041 | 1581.15  | 0.38467  | 1358.127 | 1409.192 |
| YMR143W           | 21267.01 | 17057.5  | 19612.93 | 20526.86 | 20597.86 | 19064.8  | 0.055017 | 23742.49 | 19884.09 |
| YBR221W- <i>f</i> | 0        | 0.98884  | 1.976114 | 0        | 3.45679  | 0.978435 | 0.580998 | 0        | 0        |
| YGR025W           | 13.81872 | 7.910723 | 1.976114 | 7.163448 | 5.761317 | 5.870608 | -0.33485 | 4.49711  | 1.756002 |
| YHR032C- <i>f</i> | 4.60624  | 2.966521 | 0        | 2.686293 | 0        | 0        | -1.4952  | 0        | 0.878001 |
| YMR043W           | 2611.738 | 2434.525 | 2662.813 | 2663.012 | 2548.807 | 2591.874 | 0.017599 | 2300.272 | 2562.007 |
| YBL027W           | 48990.81 | 38589.5  | 44408.21 | 48762.49 | 46235.72 | 45791.72 | 0.093132 | 53674.13 | 46907.21 |
| YGR195W           | 1254.049 | 1439.752 | 1281.51  | 1641.325 | 1488.724 | 1400.14  | 0.188504 | 1590.853 | 1457.482 |
| YNL193W           | 421.4709 | 418.2795 | 379.4138 | 349.2181 | 426.3375 | 412.8994 | -0.03681 | 419.3555 | 446.0245 |
| YDR267C           | 808.3951 | 871.1684 | 910.9884 | 930.3528 | 913.7449 | 859.0657 | 0.061389 | 849.9538 | 813.029  |
| YKL112W           | 1083.618 | 1140.133 | 1232.107 | 1115.707 | 1131.523 | 1456.889 | 0.100087 | 800.4856 | 1144.913 |
| YKL014C           | 1813.707 | 1661.252 | 1782.455 | 1997.707 | 2165.103 | 2839.418 | 0.413461 | 1988.847 | 2337.239 |
| YDR099W           | 8215.229 | 6980.225 | 8251.263 | 7712.347 | 7965.597 | 7763.879 | -0.0003  | 7681.064 | 8391.056 |
| YHL012W           | 196.9167 | 185.902  | 186.7427 | 236.3938 | 255.8025 | 259.2852 | 0.399886 | 207.9913 | 270.4243 |
| YGR074W           | 9.21248  | 19.77681 | 21.73725 | 8.95431  | 9.218108 | 8.805912 | -0.91094 | 12.36705 | 9.658012 |
| YDL240C- <i>f</i> | 2.30312  | 0        | 0        | 0        | 0        | 0        | #NUM!    | 0        | 0.878001 |
| YDR061W           | 971.9166 | 1018.506 | 970.2718 | 848.8686 | 851.5227 | 807.2086 | -0.23963 | 834.2139 | 789.323  |
| YPL234C           | 3076.968 | 2860.715 | 2910.815 | 3129.531 | 3229.795 | 2744.509 | 0.041042 | 3520.113 | 3142.366 |
| YIR032C           | 177.3402 | 170.0806 | 146.2324 | 125.3603 | 149.7943 | 131.1103 | -0.28108 | 220.3584 | 137.8462 |
| YDR034C- <i>f</i> | 5.7578   | 0        | 0        | 0        | 0        | 0        | #NUM!    | 0        | 1.756002 |
| YMR298W           | 2209.844 | 2006.357 | 2018.6   | 2246.636 | 2274.568 | 2035.144 | 0.072549 | 2434.061 | 1972.868 |
| YKR082W           | 1269.019 | 1149.033 | 1398.1   | 1482.834 | 1518.683 | 2096.786 | 0.417898 | 1372.743 | 1548.794 |
| YDL023C           | 0        | 0        | 0        | 0.895431 | 0        | 0        | #DIV/0!  | 1.124277 | 0        |
| YMR128W           | 1356.538 | 1339.879 | 1433.67  | 1567.004 | 1598.189 | 2075.26  | 0.34352  | 1360.376 | 1662.934 |
| YKL083W           | 2.30312  | 0.98884  | 0        | 0        | 1.152263 | 0        | -1.51448 | 3.372832 | 0        |
| YER147C           | 532.0207 | 577.4828 | 452.53   | 524.7226 | 409.0535 | 481.3899 | -0.14245 | 547.5231 | 440.7565 |
| YJR079W           | 3.45468  | 1.977681 | 0.988057 | 0.895431 | 2.304527 | 1.956869 | -0.31618 | 5.621387 | 3.512004 |
| YGR169C           | 443.3506 | 458.822  | 367.5571 | 357.277  | 442.4692 | 481.3899 | 0.012902 | 455.3324 | 355.5904 |

|                   |          |          |          |          |          |          |          |          |          |
|-------------------|----------|----------|----------|----------|----------|----------|----------|----------|----------|
| YPR099C           | 3.45468  | 0.98884  | 0.988057 | 0.895431 | 0        | 0        | -2.60072 | 1.124277 | 0        |
| YGR055W           | 7191.492 | 10728.92 | 7733.521 | 8483.314 | 7666.009 | 6244.37  | -0.19609 | 6430.867 | 6422.578 |
| YDR472W           | 1110.104 | 1074.87  | 1074.018 | 1038.7   | 1181.07  | 1113.459 | 0.032495 | 1046.702 | 1157.205 |
| YNL230C           | 442.199  | 499.3644 | 547.3835 | 529.1997 | 464.3622 | 444.2094 | -0.05046 | 471.0723 | 466.2186 |
| YBR278W           | 277.5259 | 193.8127 | 210.4561 | 200.5765 | 197.0371 | 201.5576 | -0.18637 | 245.0925 | 170.3322 |
| YAR019W- <i>f</i> | 10.36404 | 10.87724 | 11.85668 | 6.268017 | 4.609054 | 12.71965 | -0.48816 | 4.49711  | 13.17002 |
| YOR294W           | 3271.582 | 3207.798 | 3059.024 | 3921.092 | 3558.19  | 3247.425 | 0.169387 | 3667.393 | 3430.35  |
| YDR327W           | 63.3358  | 49.44202 | 30.62976 | 37.6081  | 50.69959 | 30.33148 | -0.27354 | 62.95954 | 41.26605 |
| YDL125C           | 2833.989 | 2320.808 | 2710.24  | 2595.855 | 2546.502 | 2342.373 | -0.0715  | 2852.292 | 2407.479 |
| YFL068W           | 0        | 0.98884  | 0        | 0        | 0        | 0        | #NUM!    | 0        | 0        |
| YPR110C           | 4233.134 | 4485.38  | 4356.343 | 4966.06  | 5087.243 | 4749.322 | 0.179058 | 4799.541 | 4562.094 |
| YHL002C- <i>f</i> | 1.15156  | 0        | 0        | 0        | 0        | 0        | #NUM!    | 0        | 0        |
| YCL076W           | 0        | 0.98884  | 0        | 0        | 0        | 0        | #NUM!    | 0        | 0        |
| YMR052C- <i>f</i> | 0        | 0        | 0.988057 | 0        | 0        | 0        | #NUM!    | 0        | 0        |
| YBL035C           | 652.9345 | 669.445  | 749.9351 | 763.8027 | 919.5062 | 988.2191 | 0.366422 | 785.87   | 772.6409 |
| YGR149W           | 474.4427 | 482.5541 | 442.6495 | 411.0028 | 456.2963 | 419.7485 | -0.121   | 384.5029 | 353.8344 |
| YLR196W           | 3292.31  | 3529.172 | 3367.298 | 4229.121 | 3966.091 | 3771.866 | 0.23209  | 4055.269 | 4069.535 |
| YFL042C           | 665.6016 | 616.0476 | 631.3683 | 590.9845 | 513.9095 | 608.5864 | -0.15892 | 595.8671 | 530.3126 |
| YPL026C           | 718.5734 | 961.1529 | 819.0991 | 571.285  | 521.9754 | 529.3332 | -0.62295 | 685.8093 | 675.1828 |
| YEL029C           | 479.0489 | 606.1592 | 517.7418 | 602.6251 | 521.9754 | 526.3979 | 0.042609 | 573.3815 | 487.2906 |
| YDR374C           | 16.12184 | 3.955362 | 7.904455 | 8.95431  | 20.74074 | 9.784347 | 0.496619 | 6.745665 | 3.512004 |
| YPL164C           | 231.4635 | 259.0762 | 205.5158 | 220.276  | 212.0165 | 225.04   | -0.08258 | 224.8555 | 221.2563 |
| YJR001W           | 2105.052 | 2478.034 | 2386.157 | 2505.416 | 2477.366 | 2433.367 | 0.089668 | 2122.636 | 2124.763 |
| YMR119W           | 422.6225 | 575.5051 | 526.6343 | 419.0617 | 480.4939 | 462.7996 | -0.16248 | 481.1908 | 470.6086 |
| YMR088C           | 955.7947 | 1080.803 | 961.3793 | 1072.726 | 1065.844 | 1006.809 | 0.069245 | 1015.223 | 1049.211 |
| YPL001W           | 695.5422 | 718.887  | 679.7831 | 599.0434 | 707.4898 | 630.112  | -0.11285 | 647.5838 | 633.9168 |
| YLR215C           | 617.2361 | 645.7128 | 643.225  | 621.4291 | 649.8766 | 565.5353 | -0.05345 | 608.2341 | 574.2127 |
| YGL129C           | 1199.925 | 1230.117 | 1383.28  | 1306.434 | 1338.93  | 1497.984 | 0.119748 | 1373.867 | 1424.996 |
| YMR123W           | 1875.891 | 1505.015 | 1538.404 | 1640.43  | 1786.008 | 1545.927 | 0.015476 | 1957.367 | 1546.16  |
| YJL173C           | 945.4307 | 666.4785 | 803.2902 | 776.3387 | 845.7614 | 786.6615 | -0.00385 | 848.8295 | 803.371  |
| YKL122C           | 2553.008 | 2229.835 | 2461.25  | 2649.58  | 2847.243 | 2279.753 | 0.10233  | 2501.517 | 2421.527 |
| YOR160W           | 886.7012 | 1070.914 | 1029.555 | 1092.426 | 1134.98  | 1271.965 | 0.228316 | 1110.786 | 1115.061 |
| YLR236C           | 19.57652 | 26.69869 | 7.904455 | 18.80405 | 20.74074 | 9.784347 | -0.13531 | 7.869942 | 17.56002 |
| YLR135W           | 333.9524 | 366.8598 | 389.2944 | 352.7998 | 361.8107 | 365.9346 | -0.01271 | 293.4364 | 388.0765 |
| YKL194C           | 480.2005 | 519.1412 | 538.491  | 479.951  | 511.605  | 471.6055 | -0.07181 | 469.948  | 530.3126 |
| YJR162C           | 0        | 0        | 0        | 0        | 2.304527 | 0.978435 | #DIV/0!  | 0        | 0        |
| YER006C- <i>f</i> | 0        | 0        | 0        | 0        | 2.304527 | 0        | #DIV/0!  | 0        | 0        |
| YPR026W           | 344.3164 | 275.8865 | 355.7005 | 211.3217 | 213.1687 | 236.7812 | -0.5615  | 237.2225 | 251.1083 |
| YJR087W           | 0        | 0        | 0        | 0        | 1.152263 | 0.978435 | #DIV/0!  | 0        | 0        |
| YBR056W- <i>f</i> | 3.45468  | 8.899564 | 4.940284 | 5.372586 | 16.13169 | 0.978435 | 0.3785   | 4.49711  | 3.512004 |
| YKL075C           | 476.7458 | 547.8176 | 480.1956 | 460.2515 | 535.8025 | 558.6862 | 0.047141 | 504.8006 | 458.3166 |
| YAL067W- <i>f</i> | 0        | 1.977681 | 0        | 0        | 0        | 0.978435 | -1.01526 | 1.124277 | 0.878001 |
| YEL043W           | 2333.06  | 2098.319 | 2191.51  | 2252.904 | 2600.659 | 3058.587 | 0.256609 | 2057.428 | 2354.799 |
| YER102W           | 22061.59 | 18121.49 | 22267.84 | 23241.81 | 23002.64 | 21812.25 | 0.124014 | 25656.01 | 22848.22 |
| YLR340W           | 47729.86 | 37258.52 | 35291.41 | 41100.28 | 39562.97 | 33657.18 | -0.07331 | 53901.24 | 41767.39 |
| YGL223C           | 636.8126 | 687.2441 | 709.4248 | 703.8088 | 783.5392 | 708.3867 | 0.110752 | 749.8931 | 642.6968 |
| YER005W           | 937.3698 | 1100.579 | 896.1675 | 960.7975 | 964.4445 | 987.2406 | -0.01068 | 884.8064 | 962.2892 |
| YGR018C           | 0        | 0        | 0        | 0.895431 | 0        | 0.978435 | #DIV/0!  | 0        | 0        |
| YEL062W           | 316.679  | 412.3465 | 339.8915 | 316.0872 | 311.1111 | 362.0208 | -0.11179 | 310.3006 | 278.3263 |
| YDL238C           | 190.0074 | 218.5337 | 222.3128 | 106.5563 | 186.6667 | 165.3555 | -0.46014 | 194.5    | 184.3802 |
| YGR260W           | 2101.597 | 2400.905 | 2141.119 | 2347.82  | 2358.683 | 2206.37  | 0.057316 | 2671.283 | 2260.853 |
| YGL202W           | 5369.724 | 5161.747 | 5269.307 | 5269.612 | 5160.988 | 4857.928 | -0.04755 | 5483.101 | 5056.408 |
| YKL147C           | 0        | 0        | 0        | 1.790862 | 0        | 0.978435 | #DIV/0!  | 0        | 0        |
| YPR143W           | 1165.379 | 1200.452 | 1069.077 | 1411.199 | 1239.835 | 1195.647 | 0.163343 | 1387.358 | 1273.102 |

|           |          |          |          |          |          |          |          |          |          |
|-----------|----------|----------|----------|----------|----------|----------|----------|----------|----------|
| YGR240C-1 | 109.3982 | 150.3037 | 104.734  | 119.0923 | 106.0082 | 92.9513  | -0.1964  | 103.4335 | 101.8481 |
| YJL075C   | 11.5156  | 4.944202 | 3.952227 | 6.268017 | 6.913581 | 3.913739 | -0.25582 | 5.621387 | 6.146008 |
| YHR030C   | 1589.153 | 1791.779 | 1548.285 | 1689.678 | 1795.226 | 1460.803 | 0.004819 | 1611.09  | 1695.42  |
| YDR059C   | 290.1931 | 390.592  | 304.3215 | 274.0019 | 292.6749 | 242.6518 | -0.28355 | 309.1763 | 255.4983 |
| YOL102C   | 710.5125 | 594.2931 | 595.7983 | 607.9977 | 629.1359 | 497.0448 | -0.13221 | 640.8382 | 501.3386 |
| YEL042W   | 4030.46  | 4162.029 | 4161.695 | 4397.462 | 4537.614 | 4537.002 | 0.124973 | 4580.306 | 4461.123 |
| YMR242C   | 30705.19 | 24635.97 | 27773.29 | 30841.33 | 30148.97 | 28362.87 | 0.10442  | 34339.93 | 28866.04 |
| YMR287C   | 559.6581 | 508.264  | 546.3954 | 544.4221 | 524.2799 | 705.4514 | 0.136206 | 557.6416 | 625.1368 |
| YIL001W   | 348.9227 | 472.6657 | 397.1988 | 347.4272 | 338.7655 | 369.8483 | -0.20678 | 344.0289 | 350.3224 |
| YKL041W   | 1158.469 | 1158.921 | 1167.883 | 1089.74  | 1028.971 | 1133.027 | -0.10006 | 1217.593 | 1195.837 |
| YDR187C   | 0        | 4.944202 | 3.952227 | 0.895431 | 0        | 0.978435 | -2.24721 | 3.372832 | 2.634003 |
| YLR222C   | 1966.864 | 2301.032 | 2054.17  | 2421.245 | 2420.906 | 2845.288 | 0.282107 | 2245.182 | 2218.709 |
| YHL016C   | 120.9138 | 140.4153 | 84.97289 | 90.43853 | 99.09466 | 70.4473  | -0.41363 | 92.19075 | 75.50809 |
| YGR275W   | 930.4604 | 746.5745 | 871.4661 | 1033.327 | 974.8149 | 761.2222 | 0.119906 | 991.6127 | 962.2892 |
| YNR058W   | 87.51856 | 111.739  | 149.1966 | 131.6284 | 76.04939 | 79.25321 | -0.28026 | 69.7052  | 112.3841 |
| YER173W   | 343.1649 | 435.0898 | 358.6646 | 397.5714 | 371.0288 | 410.9426 | 0.053098 | 344.0289 | 375.7845 |
| YPL243W   | 3529.531 | 3089.138 | 3578.742 | 3635.45  | 3597.367 | 4155.412 | 0.159341 | 3552.717 | 3386.45  |
| YOL127W   | 38076.33 | 29659.28 | 35519.65 | 38710.38 | 39460.41 | 38930.94 | 0.181547 | 45713.12 | 37982.33 |
| YMR074C   | 1834.435 | 1490.183 | 1707.362 | 1738.032 | 1850.535 | 1656.49  | 0.059832 | 1876.419 | 1782.342 |
| YOR096W   | 33748.77 | 25130.39 | 29414.45 | 32309.84 | 31302.39 | 30514.44 | 0.092295 | 36323.16 | 30304.21 |
| YER084W-1 | 1.15156  | 1.977681 | 0        | 0.895431 | 0        | 0        | -1.80516 | 1.124277 | 0.878001 |
| YKR080W   | 3306.129 | 3673.542 | 3605.419 | 3904.975 | 3803.622 | 3856.011 | 0.127683 | 3107.503 | 2906.184 |
| YJL077C   | 31.09212 | 40.54246 | 34.58199 | 39.39897 | 26.50206 | 24.46087 | -0.23322 | 41.59827 | 42.14405 |
| YLR445W   | 26.48588 | 13.84377 | 9.880568 | 12.53603 | 18.43622 | 13.69809 | -0.16866 | 17.98844 | 8.780011 |
| YBR196C-1 | 23.0312  | 24.72101 | 21.73725 | 23.28121 | 38.02469 | 39.13739 | 0.531515 | 46.09538 | 23.70603 |
| YBR064W   | 0        | 0        | 0.988057 | 2.686293 | 2.304527 | 2.935304 | 3.00395  | 0        | 3.512004 |
| YLR425W   | 460.624  | 396.525  | 426.8405 | 346.5318 | 437.8601 | 498.0233 | -0.00177 | 312.5491 | 489.0466 |
| YLR320W   | 441.0475 | 411.3576 | 510.8254 | 423.5389 | 415.9671 | 492.1527 | -0.03381 | 411.4856 | 388.0765 |
| YHR195W   | 935.0667 | 918.6328 | 866.5258 | 794.2473 | 872.2634 | 833.6264 | -0.12172 | 906.1676 | 811.273  |
| YGR214W   | 36822.28 | 30729.21 | 35079.97 | 36791.47 | 36361.98 | 35110.15 | 0.077075 | 39870.25 | 36012.09 |
| YJR017C   | 1832.132 | 1499.082 | 1526.548 | 1727.286 | 1603.951 | 1400.14  | -0.03803 | 1685.292 | 1523.332 |
| YCR095W-1 | 17.2734  | 33.62057 | 33.59393 | 11.6406  | 18.43622 | 13.69809 | -0.94864 | 14.61561 | 23.70603 |
| YLR436C   | 842.9419 | 919.6216 | 970.2718 | 883.7904 | 820.4116 | 1008.766 | -0.01053 | 757.763  | 1000.921 |
| YPR010C   | 5939.746 | 6824.977 | 6658.515 | 7515.353 | 7702.881 | 9119.012 | 0.325382 | 7322.419 | 7643.877 |
| YNL103W-1 | 0        | 2.966521 | 2.96417  | 1.790862 | 6.913581 | 5.870608 | 1.297229 | 1.124277 | 3.512004 |
| YHR049C-1 | 14.97028 | 15.82145 | 19.76114 | 6.268017 | 29.95885 | 29.35304 | 0.375461 | 19.11272 | 24.58403 |
| YML076C   | 490.5645 | 554.7395 | 549.3596 | 530.9906 | 551.9342 | 621.306  | 0.095869 | 481.1908 | 506.6066 |
| YGR273C   | 4.60624  | 0        | 1.976114 | 4.477155 | 0        | 1.956869 | -0.03288 | 4.49711  | 0        |
| YLR338W   | 1.15156  | 0        | 0        | 0.895431 | 0        | 0        | -0.36294 | 1.124277 | 0        |
| YPL092W   | 891.3074 | 966.0971 | 901.1078 | 881.1041 | 946.0083 | 709.3652 | -0.12106 | 839.8353 | 856.051  |
| YBL092W   | 49393.86 | 38294.82 | 45722.33 | 48785.77 | 48739.59 | 45158.68 | 0.096946 | 56292.57 | 47083.69 |
| YGR028W   | 772.6967 | 846.4474 | 769.6963 | 729.7763 | 624.5268 | 595.8667 | -0.29271 | 775.7515 | 822.687  |
| YFR018C   | 1345.022 | 1413.053 | 1184.68  | 1395.977 | 1327.408 | 1018.551 | -0.07542 | 1288.422 | 1218.665 |
| YCL065W   | 1.15156  | 0        | 0        | 0        | 1.152263 | 0        | 0.000881 | 1.124277 | 0        |
| YCL067C   | 2.30312  | 0        | 0        | 0        | 0        | 0        | #NUM!    | 0        | 0        |
| YHR191C   | 314.3759 | 225.4556 | 225.277  | 341.1592 | 252.3457 | 237.7596 | 0.119643 | 301.3064 | 252.8643 |
| YKL099C   | 1961.107 | 2087.442 | 2087.764 | 2401.546 | 2501.564 | 2432.389 | 0.257523 | 2248.555 | 2320.557 |
| YOR334W   | 376.5601 | 423.2237 | 372.4974 | 365.3359 | 379.0947 | 327.7756 | -0.12874 | 378.8815 | 358.2244 |
| YEL025C   | 700.1484 | 691.1995 | 746.971  | 675.155  | 645.2675 | 732.8476 | -0.05855 | 630.7197 | 705.9129 |
| YFR049W   | 626.4486 | 511.2305 | 586.9058 | 462.9378 | 479.3416 | 431.4897 | -0.32811 | 559.8902 | 554.0187 |
| YGL209W   | 187.7043 | 200.7346 | 257.8828 | 195.204  | 135.9671 | 154.5927 | -0.412   | 181.0087 | 200.1842 |
| YPR021C   | 540.0816 | 552.7618 | 579.0013 | 586.5073 | 549.6297 | 712.3005 | 0.144865 | 563.263  | 582.9927 |
| YGL016W   | 718.5734 | 754.4853 | 865.5378 | 904.3853 | 791.605  | 1164.337 | 0.290537 | 851.0781 | 989.5072 |
| YOR280C   | 483.6552 | 381.6924 | 418.9361 | 444.1338 | 437.8601 | 330.7109 | -0.08274 | 430.5983 | 447.7805 |

|         |          |          |          |          |          |          |          |          |          |
|---------|----------|----------|----------|----------|----------|----------|----------|----------|----------|
| YBR093C | 380.0148 | 526.0631 | 371.5094 | 286.5379 | 406.749  | 432.4681 | -0.18253 | 290.0636 | 324.8604 |
| YOR396W | 0        | 0.98884  | 0.988057 | 0.895431 | 5.761317 | 0        | 1.75158  | 0        | 0        |
| YIL141W | 1.15156  | 3.955362 | 1.976114 | 0        | 0        | 4.892174 | -0.53389 | 1.124277 | 4.390005 |
| YLR028C | 5294.873 | 5606.725 | 5352.304 | 5377.959 | 4951.276 | 4926.419 | -0.09144 | 5257.121 | 5273.274 |
| YLR221C | 1740.007 | 1493.149 | 1632.27  | 2002.184 | 1807.901 | 1761.182 | 0.195439 | 1849.436 | 1958.82  |
| YDR469W | 1047.92  | 863.2577 | 1007.818 | 930.3528 | 1022.058 | 1001.917 | 0.017358 | 969.1272 | 1112.427 |
| YDR011W | 6323.216 | 6363.188 | 7438.092 | 6285.926 | 6322.47  | 8422.366 | 0.063548 | 6222.876 | 7550.809 |
| YDL119C | 229.1604 | 217.5449 | 196.6233 | 179.9816 | 208.5597 | 149.7005 | -0.2573  | 207.9913 | 201.9402 |
| YPL171C | 38.00148 | 63.28579 | 42.48644 | 85.96138 | 66.83128 | 41.09426 | 0.431416 | 44.9711  | 49.16806 |
| YER159C | 1515.453 | 1425.908 | 1436.635 | 1570.586 | 1580.905 | 1292.512 | 0.02159  | 1369.37  | 1468.018 |
| YMR224C | 309.7696 | 340.1611 | 352.7363 | 349.2181 | 314.5679 | 282.7676 | -0.08309 | 288.9393 | 329.2504 |
| YGR265W | 4.60624  | 14.83261 | 10.86863 | 17.90862 | 17.28395 | 34.24522 | 1.196047 | 17.98844 | 10.53601 |
| YHR167W | 511.2926 | 461.7885 | 480.1956 | 428.016  | 543.8684 | 390.3955 | -0.09329 | 432.8468 | 431.0985 |
| YLR345W | 633.358  | 661.5342 | 694.6039 | 582.0302 | 518.5186 | 458.8859 | -0.35138 | 529.5347 | 587.3827 |
| YKR054C | 869.4278 | 794.0389 | 820.0872 | 840.8097 | 864.1976 | 951.0385 | 0.096874 | 811.7283 | 845.515  |
| YOR002W | 1573.031 | 1711.683 | 1661.912 | 1486.416 | 1605.103 | 1470.587 | -0.11674 | 1554.876 | 1517.186 |
| YBR178W | 0        | 1.977681 | 3.952227 | 0        | 2.304527 | 1.956869 | -0.47668 | 0        | 1.756002 |
| YDL074C | 2140.75  | 1931.205 | 2035.397 | 2206.342 | 2363.292 | 2954.873 | 0.30105  | 2021.451 | 2172.175 |
| YPL099C | 342.0133 | 344.1165 | 359.6527 | 352.7998 | 301.893  | 281.7892 | -0.15926 | 383.3786 | 339.7864 |
| YDL135C | 1440.601 | 1080.803 | 1174.8   | 1164.06  | 1217.942 | 1179.014 | -0.05376 | 1252.445 | 1272.224 |
| YDL011C | 0        | 0        | 0        | 0.895431 | 0        | 0        | #DIV/0!  | 0        | 0        |
| YJL009W | 33.39524 | 24.72101 | 14.82085 | 23.28121 | 28.80659 | 25.4393  | 0.088048 | 31.47977 | 23.70603 |
| YDR480W | 710.5125 | 630.8802 | 572.0849 | 558.749  | 528.8889 | 516.6135 | -0.2543  | 487.9364 | 439.8785 |
| YBR121C | 8674.701 | 8498.095 | 8200.872 | 9049.226 | 8670.783 | 8410.625 | 0.04241  | 9337.124 | 8606.167 |
| YKR035C | 0        | 0        | 0        | 0        | 0        | 0.978435 | #DIV/0!  | 0        | 0        |
| YPR073C | 1283.989 | 1173.754 | 1439.599 | 1238.381 | 1273.251 | 1382.528 | -0.00118 | 1504.283 | 1341.586 |
| YOR079C | 442.199  | 431.1344 | 463.3987 | 394.8851 | 382.5515 | 424.6407 | -0.15318 | 429.474  | 417.0505 |
| YIL050W | 530.8691 | 568.5832 | 467.3509 | 429.8069 | 492.0165 | 412.8994 | -0.23128 | 433.9711 | 442.5125 |
| YDL002C | 1090.527 | 1302.303 | 1219.262 | 1224.95  | 1293.992 | 1216.194 | 0.048326 | 1335.642 | 1206.373 |
| YDR499W | 447.9568 | 368.8375 | 448.5778 | 476.3693 | 470.1235 | 512.6998 | 0.205609 | 405.8642 | 457.4386 |
| YLR083C | 2686.589 | 2700.523 | 3054.084 | 3193.107 | 3374.98  | 3443.112 | 0.246095 | 3020.934 | 3026.47  |
| YDR013W | 325.8915 | 321.3731 | 345.8199 | 353.6953 | 373.3334 | 343.4306 | 0.108241 | 348.526  | 351.2004 |
| YGL128C | 308.6181 | 273.9088 | 276.6559 | 308.0283 | 286.9136 | 238.7381 | -0.04347 | 286.6908 | 284.4723 |
| YPL213W | 451.4115 | 490.4649 | 461.4225 | 374.2902 | 440.1646 | 367.8915 | -0.24717 | 405.8642 | 489.9246 |
| YLL067C | 8.06092  | 4.944202 | 3.952227 | 4.477155 | 3.45679  | 6.849043 | -0.19797 | 0        | 5.268006 |
| YLR166C | 898.2168 | 783.1616 | 891.2273 | 825.5874 | 922.963  | 1156.51  | 0.175338 | 909.5405 | 864.8311 |
| YPR153W | 58.72956 | 89.98448 | 49.40284 | 54.62129 | 62.22223 | 60.66295 | -0.15848 | 56.21387 | 63.21608 |
| YNL091W | 2672.771 | 2286.199 | 3165.734 | 2804.49  | 2562.634 | 3005.751 | 0.043408 | 2547.613 | 2994.862 |
| YPL236C | 274.0713 | 282.8084 | 255.9067 | 266.8384 | 215.4733 | 237.7596 | -0.17474 | 276.5723 | 221.2563 |
| YKL046C | 2265.118 | 2377.172 | 2353.551 | 2436.468 | 2201.975 | 2131.031 | -0.04745 | 2358.734 | 2309.143 |
| YJL178C | 2413.67  | 2259.5   | 2393.074 | 2589.587 | 2287.243 | 2425.54  | 0.047421 | 2799.451 | 2424.161 |
| YPL096W | 682.875  | 696.1437 | 626.428  | 553.3764 | 564.6091 | 557.7078 | -0.25917 | 657.7023 | 549.6287 |
| YDR110W | 821.0622 | 921.5993 | 949.5226 | 919.6077 | 932.1811 | 985.2838 | 0.075626 | 955.6359 | 958.7772 |
| YGL031C | 29622.73 | 22892.64 | 27231.83 | 28459.48 | 27221.07 | 26296.41 | 0.039785 | 33029.02 | 27921.31 |
| YHR074W | 1969.167 | 1742.337 | 1731.076 | 1597.449 | 1601.646 | 1779.773 | -0.12847 | 1814.584 | 1720.004 |
| YPL235W | 2470.096 | 2648.115 | 2386.157 | 2568.992 | 2563.786 | 2231.81  | -0.02713 | 2595.957 | 2498.791 |
| YIL004C | 556.2035 | 503.3198 | 535.5268 | 573.9713 | 596.8725 | 498.0233 | 0.065267 | 654.3295 | 506.6066 |
| YPL090C | 18362.77 | 14415.32 | 17766.25 | 19869.61 | 17432.59 | 16934.75 | 0.101727 | 19696.22 | 18240.47 |
| YCL011C | 2890.415 | 3465.886 | 2951.326 | 3283.546 | 3189.465 | 2775.819 | -0.00914 | 3252.535 | 3024.714 |
| YMR097C | 445.6537 | 503.3198 | 418.9361 | 425.3297 | 434.4033 | 420.7269 | -0.09531 | 455.3324 | 432.8545 |
| YFR022W | 198.0683 | 272.92   | 232.1934 | 209.5309 | 214.321  | 221.1262 | -0.12465 | 238.3468 | 223.8903 |
| YBR111C | 3004.42  | 2536.376 | 2695.419 | 2857.32  | 2800     | 2558.607 | -0.00356 | 3316.619 | 2719.169 |
| YFL024C | 824.5169 | 819.7487 | 802.3021 | 830.96   | 876.8725 | 883.5265 | 0.08295  | 623.974  | 826.199  |
| YDL142C | 408.8038 | 409.3799 | 429.8047 | 367.1267 | 357.2017 | 312.1207 | -0.26796 | 328.289  | 320.4704 |

|           |          |          |          |          |          |          |          |          |          |
|-----------|----------|----------|----------|----------|----------|----------|----------|----------|----------|
| YLR288C   | 363.8929 | 381.6924 | 285.5484 | 351.009  | 292.6749 | 275.9186 | -0.16515 | 297.9335 | 302.0324 |
| YNR049C   | 648.3282 | 649.6682 | 657.0578 | 643.8149 | 615.3087 | 518.5704 | -0.1372  | 679.0636 | 615.4788 |
| YJR076C   | 1906.983 | 1918.35  | 2009.708 | 2255.591 | 2166.255 | 2393.251 | 0.223991 | 2051.806 | 2072.083 |
| YPR036W   | 15455.09 | 13653.91 | 14425.63 | 15496.33 | 15191.44 | 15257.71 | 0.07776  | 14620.1  | 13769.69 |
| YDR446W   | 14.97028 | 14.83261 | 22.72531 | 8.058879 | 16.13169 | 16.63339 | -0.36368 | 16.86416 | 14.92602 |
| YKL205W   | 1479.755 | 1487.216 | 1538.404 | 1630.58  | 1701.893 | 2009.705 | 0.245781 | 1594.225 | 1716.492 |
| YLR251W   | 233.7667 | 247.2101 | 234.1695 | 159.3867 | 131.358  | 138.9377 | -0.73497 | 231.6012 | 220.3783 |
| YIL156W-f | 304.0118 | 230.3998 | 289.5006 | 183.5634 | 217.7778 | 251.4577 | -0.33585 | 311.4249 | 258.1323 |
| YKL081W   | 35280.34 | 34055.66 | 33985.2  | 34704.22 | 33873.09 | 31364.7  | -0.04797 | 36252.33 | 34569.54 |
| YOL075C   | 368.4992 | 395.5362 | 374.4735 | 410.1074 | 443.6214 | 549.8803 | 0.301996 | 380.0058 | 495.1926 |
| YGL042C   | 217.6448 | 147.3372 | 151.1727 | 119.0923 | 150.9465 | 100.7788 | -0.47709 | 223.7312 | 136.0902 |
| YDL203C   | 633.358  | 680.3222 | 725.2337 | 681.423  | 732.8396 | 778.834  | 0.105169 | 598.1156 | 680.4508 |
| YBR068C   | 2254.754 | 2809.296 | 2330.826 | 2090.831 | 1945.021 | 1765.096 | -0.35024 | 2137.251 | 2087.887 |
| YLR446W   | 343.1649 | 515.1859 | 401.1511 | 384.1399 | 381.3992 | 347.3443 | -0.17855 | 363.1416 | 368.7605 |
| YMR122C   | 101.3373 | 97.8952  | 95.84151 | 79.69336 | 85.2675  | 82.18852 | -0.25569 | 83.19653 | 113.2621 |
| YDL237W   | 1326.597 | 1399.209 | 1350.674 | 1275.989 | 1260.576 | 1244.569 | -0.1085  | 1450.318 | 1251.152 |
| YHR128W   | 3995.913 | 4092.811 | 3928.514 | 4521.031 | 4908.642 | 4140.736 | 0.175359 | 4751.197 | 4339.959 |
| YBL090W   | 1135.438 | 970.0525 | 1052.281 | 1000.196 | 956.3787 | 995.0681 | -0.09739 | 1209.723 | 995.6532 |
| YJL085W   | 526.2629 | 554.7395 | 542.4432 | 548.8992 | 568.0659 | 603.6942 | 0.083902 | 541.9017 | 569.8227 |
| YLR342W   | 11221.95 | 10411.5  | 11222.35 | 11503.6  | 11976.63 | 14460.29 | 0.207591 | 11205.67 | 11989.1  |
| YER050C   | 1247.139 | 1145.077 | 1114.528 | 1156.897 | 1101.564 | 1025.4   | -0.09474 | 1380.613 | 1101.013 |
| YIR042C   | 0        | 0        | 0        | 0.895431 | 2.304527 | 0        | #DIV/0!  | 0        | 0        |
| YOR037W   | 374.257  | 381.6924 | 328.0349 | 372.4993 | 289.2181 | 328.7541 | -0.13016 | 317.0462 | 348.5664 |
| YKR002W   | 1032.949 | 1066.959 | 1019.675 | 1017.21  | 993.2511 | 949.0817 | -0.07598 | 1032.087 | 989.5072 |
| YOR029W   | 2.30312  | 3.955362 | 4.940284 | 1.790862 | 6.913581 | 1.956869 | -0.07095 | 0        | 7.90201  |
| YEL052W   | 959.2494 | 952.2533 | 966.3196 | 862.3001 | 909.1359 | 808.1871 | -0.15782 | 1061.318 | 1007.067 |
| YHR151C   | 482.5036 | 539.9069 | 491.0642 | 425.3297 | 485.1029 | 466.7134 | -0.13618 | 455.3324 | 453.0486 |
| YJL136W-f | 2.30312  | 0.98884  | 0.988057 | 0.895431 | 0        | 0        | -2.25696 | 0        | 0        |
| YOR279C   | 305.1634 | 293.6856 | 286.5365 | 359.0678 | 307.6543 | 349.3012 | 0.198556 | 322.6676 | 278.3263 |
| YBR058C-f | 973.0681 | 662.5231 | 879.3706 | 848.8686 | 804.2799 | 784.7046 | -0.04493 | 1028.714 | 876.2451 |
| YOR158W   | 1423.328 | 1436.785 | 1465.288 | 1249.126 | 1258.272 | 1369.809 | -0.15782 | 1364.873 | 1456.604 |
| YKL033W   | 338.5586 | 398.5027 | 373.4855 | 307.1328 | 398.6832 | 435.4034 | 0.039306 | 330.5376 | 364.3704 |
| YOL066C   | 1076.709 | 1297.359 | 1307.199 | 1299.27  | 1143.045 | 1246.526 | 0.002966 | 1303.038 | 1088.721 |
| YDR131C   | 255.6463 | 220.5114 | 238.1217 | 179.9816 | 215.4733 | 199.6007 | -0.26346 | 221.4827 | 203.6962 |
| YBR007C   | 660.9954 | 519.1412 | 532.5626 | 596.3571 | 560      | 770.0281 | 0.169624 | 554.2688 | 597.0407 |
| YGL201C   | 807.2435 | 825.6818 | 919.8809 | 919.6077 | 933.3334 | 1179.992 | 0.24863  | 862.3208 | 842.881  |
| YDR219C   | 540.0816 | 539.9069 | 561.2163 | 565.9124 | 578.4363 | 602.7158 | 0.090178 | 441.841  | 579.4807 |
| YBL067C   | 1111.255 | 1026.416 | 1076.982 | 1134.511 | 1228.313 | 1244.569 | 0.166293 | 989.3642 | 1223.055 |
| YLR054C   | 19.57652 | 14.83261 | 24.70142 | 33.13095 | 21.89301 | 20.54713 | 0.354419 | 16.86416 | 26.34003 |
| YLR277C   | 610.3268 | 671.4227 | 622.4758 | 592.7753 | 591.1112 | 715.2358 | -0.00387 | 553.1445 | 621.6248 |
| YFL022C   | 7485.14  | 6793.334 | 7191.078 | 7759.805 | 7757.038 | 8151.34  | 0.140657 | 7359.52  | 7295.311 |
| YMR316C-f | 1.15156  | 0.98884  | 2.96417  | 0        | 5.761317 | 2.935304 | 0.768665 | 0        | 1.756002 |
| YGR212W   | 208.4323 | 247.2101 | 255.9067 | 223.8578 | 235.0617 | 252.4362 | -0.00039 | 205.7428 | 271.3023 |
| YBR165W   | 418.0163 | 526.0631 | 422.8883 | 373.3947 | 394.0741 | 362.9993 | -0.27406 | 417.1069 | 446.0245 |
| YML079W   | 1297.808 | 1222.207 | 1199.501 | 1235.695 | 1126.914 | 1043.011 | -0.1272  | 1305.286 | 1272.224 |
| YGR061C   | 5906.351 | 6738.948 | 6242.543 | 7028.238 | 7000.001 | 8023.165 | 0.223413 | 6384.772 | 6750.95  |
| YML081W   | 1377.266 | 1255.827 | 1318.068 | 1429.108 | 1485.268 | 1746.506 | 0.238326 | 1371.619 | 1486.456 |
| YMR175W-f | 1.15156  | 5.933043 | 3.952227 | 1.790862 | 3.45679  | 2.935304 | -0.43163 | 2.248555 | 1.756002 |
| YDR508C   | 3368.313 | 4721.713 | 3939.383 | 3526.207 | 3411.852 | 3099.681 | -0.26113 | 3185.078 | 3360.11  |
| YER137W-f | 0        | 2.966521 | 0.988057 | 0        | 2.304527 | 0        | -0.77905 | 0        | 0        |
| YOR376W   | 23.0312  | 11.86609 | 14.82085 | 14.3269  | 11.52263 | 15.65496 | -0.2605  | 17.98844 | 21.95003 |
| YOR008W-f | 29.94056 | 19.77681 | 18.77308 | 19.69948 | 23.04527 | 31.30991 | 0.112688 | 19.11272 | 32.48604 |
| YGR134W   | 650.6314 | 630.8802 | 598.7624 | 497.8597 | 548.4774 | 615.4354 | -0.17822 | 648.7081 | 590.0167 |
| YBL026W   | 978.8259 | 883.0345 | 957.4271 | 949.1569 | 927.5721 | 1002.896 | 0.03055  | 1161.379 | 1044.821 |

|           |          |          |          |          |          |          |          |          |          |
|-----------|----------|----------|----------|----------|----------|----------|----------|----------|----------|
| YGL197W   | 825.6685 | 770.3067 | 905.0601 | 756.6392 | 825.0206 | 1167.273 | 0.136346 | 658.8266 | 942.0952 |
| YNL323W   | 1137.741 | 1134.2   | 1142.194 | 1154.211 | 1251.358 | 1319.908 | 0.125905 | 1192.858 | 1169.497 |
| YBL018C   | 284.4353 | 299.6187 | 317.1662 | 311.61   | 300.7408 | 256.3499 | -0.05302 | 311.4249 | 389.8325 |
| YKL006C-1 | 589.5987 | 531.9962 | 523.6701 | 548.8992 | 515.0618 | 494.1095 | -0.07856 | 645.3353 | 567.1887 |
| YMR232W   | 52.97176 | 47.46434 | 75.09232 | 49.24871 | 71.44034 | 43.05113 | -0.1003  | 60.71098 | 49.16806 |
| YJL126W   | 412.2585 | 436.0786 | 347.796  | 351.009  | 330.6996 | 428.5544 | -0.10748 | 357.5202 | 357.3464 |
| YKL139W   | 550.4457 | 571.5498 | 577.0252 | 562.3307 | 651.0289 | 726.977  | 0.191604 | 584.6243 | 606.6987 |
| YER175C   | 305.1634 | 315.4401 | 305.3096 | 239.9755 | 265.0206 | 258.3068 | -0.27862 | 306.9278 | 272.1803 |
| YPL069C   | 411.1069 | 432.1233 | 439.6853 | 393.9897 | 449.3828 | 343.4306 | -0.11235 | 432.8468 | 365.2484 |
| YER052C   | 2092.384 | 2400.905 | 2080.848 | 2104.263 | 1989.959 | 1875.659 | -0.1391  | 1973.107 | 2112.471 |
| YEL008W   | 17.2734  | 30.65405 | 15.80891 | 21.49034 | 25.3498  | 14.67652 | -0.05114 | 25.85838 | 12.29202 |
| YNL135C   | 12246.84 | 8801.669 | 10900.24 | 11469.58 | 10865.84 | 10154.2  | 0.024219 | 13520.56 | 11198.03 |
| YDL218W   | 59.88112 | 79.10723 | 70.15203 | 69.84362 | 53.00412 | 84.14539 | -0.01489 | 66.33237 | 70.24009 |
| YDL146W   | 299.4056 | 373.7817 | 305.3096 | 282.9562 | 281.1523 | 306.2501 | -0.16896 | 338.4075 | 292.3744 |
| YJL045W   | 35.69836 | 32.63173 | 17.78502 | 41.18983 | 33.41564 | 10.76278 | -0.01257 | 24.7341  | 22.82803 |
| YLR447C   | 6209.211 | 6031.927 | 6170.415 | 6231.305 | 6045.926 | 6084.885 | -0.00388 | 6614.124 | 5615.695 |
| YDR108W   | 452.5631 | 492.4425 | 550.3477 | 485.3236 | 481.6461 | 516.6135 | -0.0114  | 447.4624 | 475.8766 |
| YPR036W-1 | 14483.17 | 17474.79 | 13043.34 | 7600.419 | 6479.177 | 4603.535 | -1.26823 | 9664.289 | 8521     |
| YBR160W   | 1523.514 | 1327.024 | 1304.235 | 1397.768 | 1312.428 | 1240.655 | -0.07261 | 1294.043 | 1264.322 |
| YDR083W   | 2024.442 | 1948.016 | 1820.001 | 2195.597 | 2378.272 | 2336.502 | 0.254587 | 2307.017 | 2155.493 |
| YGR252W   | 830.2747 | 810.8492 | 780.5649 | 781.7113 | 721.3169 | 872.7638 | -0.0276  | 729.6561 | 859.5631 |
| YNL073W   | 665.6016 | 805.905  | 699.5442 | 595.4616 | 622.2223 | 628.1551 | -0.23412 | 727.4075 | 781.421  |
| YFR012W-1 | 10.36404 | 6.921883 | 10.86863 | 3.581724 | 8.065844 | 2.935304 | -0.94909 | 5.621387 | 5.268006 |
| YDL108W   | 461.7755 | 515.1859 | 471.3031 | 481.7419 | 458.6009 | 437.3603 | -0.07206 | 426.1012 | 388.0765 |
| YDR371W   | 505.5348 | 412.3465 | 408.0675 | 518.4546 | 488.5597 | 503.8939 | 0.188391 | 426.1012 | 434.6105 |
| YGL107C   | 950.0369 | 1085.747 | 1053.269 | 1122.871 | 1069.3   | 1112.48  | 0.097334 | 1113.035 | 1208.129 |
| YJL119C   | 0        | 6.921883 | 1.976114 | 0.895431 | 2.304527 | 0.978435 | -1.09053 | 2.248555 | 2.634003 |
| YHL046C   | 2.30312  | 0        | 0        | 0.895431 | 2.304527 | 0        | 0.474463 | 0        | 1.756002 |
| YLR403W   | 990.3415 | 1081.791 | 1279.534 | 1113.916 | 1125.761 | 1361.003 | 0.103391 | 1054.572 | 1159.839 |
| YOR150W   | 1425.631 | 1451.618 | 1330.913 | 1357.473 | 1230.617 | 1126.178 | -0.18011 | 1603.22  | 1473.286 |
| YEL020W-1 | 99.03415 | 88.99564 | 102.7579 | 127.1512 | 78.35392 | 89.03756 | 0.01851  | 110.1792 | 106.2381 |
| YDL158C   | 62.18424 | 57.35275 | 44.46256 | 45.66698 | 41.48148 | 46.96487 | -0.29024 | 57.33815 | 55.31407 |
| YHR175W-1 | 74.8514  | 52.40854 | 55.33118 | 78.79793 | 54.15638 | 40.11582 | -0.07726 | 68.58093 | 55.31407 |
| YPL010W   | 3035.512 | 2549.231 | 2631.195 | 2845.68  | 2737.778 | 2558.607 | -0.01303 | 3105.254 | 2503.181 |
| YPR096C   | 0        | 5.933043 | 5.928341 | 3.581724 | 4.609054 | 20.54713 | 1.276683 | 3.372832 | 6.146008 |
| YOR288C   | 742.7562 | 620.9918 | 688.6756 | 655.4555 | 772.0165 | 645.7669 | 0.014558 | 721.7861 | 658.5008 |
| YDL175C   | 343.1649 | 391.5808 | 380.4019 | 371.6039 | 428.642  | 393.3308 | 0.098057 | 341.7804 | 336.2744 |
| YIL098C   | 738.1499 | 719.8758 | 628.4041 | 601.7296 | 566.9136 | 544.0097 | -0.2848  | 846.5809 | 655.8668 |
| YLR029C   | 54594.31 | 46357.83 | 50648.78 | 55770.13 | 51751.61 | 48547    | 0.041903 | 59315.76 | 51265.6  |
| YGL200C   | 8030.979 | 6352.311 | 7764.151 | 7433.868 | 7793.91  | 7123.005 | 0.013185 | 8329.772 | 7316.383 |
| YJL181W   | 252.1916 | 261.0539 | 238.1217 | 208.6354 | 275.391  | 262.2205 | -0.00987 | 219.2341 | 257.2543 |
| YIL153W   | 869.4278 | 1096.624 | 835.8961 | 932.1437 | 843.4569 | 673.1631 | -0.19438 | 869.0665 | 874.4891 |
| YLR406C-1 | 5.7578   | 7.910723 | 2.96417  | 6.268017 | 1.152263 | 2.935304 | -0.68361 | 2.248555 | 6.146008 |
| YPL083C   | 513.5957 | 454.8666 | 546.3954 | 527.4089 | 518.5186 | 568.4706 | 0.091814 | 485.6879 | 595.2847 |
| YGR283C   | 1091.679 | 1084.758 | 1099.707 | 1141.675 | 1144.198 | 1130.092 | 0.060294 | 1084.928 | 1047.455 |
| YBR285W   | 290.1931 | 262.0427 | 341.8677 | 216.6943 | 262.7161 | 247.544  | -0.29858 | 342.9046 | 331.0064 |
| YNL326C   | 320.1337 | 417.2907 | 372.4974 | 440.5521 | 361.8107 | 305.2716 | -0.00298 | 342.9046 | 338.0304 |
| YHR012W   | 997.2509 | 931.4877 | 956.439  | 1043.177 | 955.2264 | 898.2031 | 0.005704 | 1062.442 | 952.6312 |
| YJL209W   | 654.086  | 741.6303 | 715.3531 | 646.5012 | 630.2881 | 759.2653 | -0.0522  | 603.737  | 741.0329 |
| YGL172W   | 1860.921 | 1960.871 | 1730.088 | 1840.111 | 1866.667 | 1944.15  | 0.025512 | 1886.538 | 1855.216 |
| YOR231W   | 610.3268 | 627.9137 | 590.858  | 550.6901 | 627.9836 | 672.1846 | 0.017062 | 554.2688 | 652.3548 |
| YER070W   | 4077.674 | 3968.217 | 4665.604 | 4383.135 | 4774.98  | 5757.11  | 0.230652 | 3941.717 | 4372.445 |
| YDR351W   | 598.8112 | 653.6235 | 856.6453 | 742.3123 | 693.6626 | 875.6991 | 0.132324 | 702.6734 | 755.9589 |
| YDR313C   | 644.8736 | 672.4115 | 630.3803 | 569.4941 | 587.6544 | 468.6702 | -0.26058 | 726.2833 | 561.0427 |



|           |          |          |          |          |          |          |          |          |          |
|-----------|----------|----------|----------|----------|----------|----------|----------|----------|----------|
| YGL171W   | 1334.658 | 1583.134 | 1463.312 | 1738.927 | 1813.663 | 1679.972 | 0.256223 | 1522.272 | 1691.908 |
| YNL269W   | 20.72808 | 18.78797 | 8.892511 | 10.74517 | 12.6749  | 7.827478 | -0.63152 | 2.248555 | 15.80402 |
| YNR039C   | 581.5378 | 658.5677 | 649.1533 | 627.6971 | 689.0536 | 590.9746 | 0.014033 | 610.4827 | 628.6488 |
| YKL206C   | 830.2747 | 822.7152 | 740.0546 | 777.2341 | 831.9342 | 651.6375 | -0.08201 | 749.8931 | 676.0608 |
| YBR142W   | 2095.839 | 1892.641 | 2241.901 | 2639.731 | 2652.511 | 3178.934 | 0.443242 | 2453.173 | 2696.341 |
| YER030W   | 1971.471 | 1552.479 | 1742.932 | 1763.999 | 1684.609 | 1687.8   | -0.03619 | 1995.593 | 1682.25  |
| YEL059W   | 14.97028 | 23.73217 | 16.79697 | 7.163448 | 17.28395 | 15.65496 | -0.46879 | 22.48555 | 3.512004 |
| YLR037C   | 72.54828 | 106.7948 | 68.17592 | 87.75224 | 47.2428  | 40.11582 | -0.49927 | 51.71676 | 75.50809 |
| YBL040C   | 1561.515 | 1434.807 | 1475.169 | 1550.887 | 1704.198 | 1412.86  | 0.062031 | 1549.254 | 1453.97  |
| YHR052W   | 3668.87  | 3384.801 | 3188.459 | 3869.157 | 4127.408 | 4125.081 | 0.24307  | 4467.879 | 3615.608 |
| YBL094C   | 0        | 0        | 0.988057 | 0.895431 | 0        | 0        | -0.14201 | 0        | 0.878001 |
| YDL141W   | 605.7205 | 649.6682 | 674.8428 | 623.22   | 538.107  | 479.433  | -0.23441 | 589.1214 | 569.8227 |
| YLR002C   | 1652.489 | 1700.806 | 1841.738 | 2179.479 | 2299.918 | 2748.423 | 0.476428 | 1967.486 | 2108.081 |
| YDR501W   | 385.7726 | 406.4134 | 406.0914 | 274.0019 | 330.6996 | 367.8915 | -0.30105 | 313.6734 | 258.1323 |
| YKL123W   | 0        | 0        | 0.988057 | 0        | 0        | 0.978435 | -0.01412 | 1.124277 | 0        |
| YMR138W   | 312.0727 | 309.5071 | 345.8199 | 364.4404 | 391.7696 | 284.7245 | 0.105695 | 400.2428 | 303.7884 |
| YPR047W   | 523.9598 | 620.9918 | 629.3922 | 531.886  | 541.5638 | 521.5057 | -0.15377 | 725.159  | 568.0667 |
| YLR382C   | 687.4813 | 728.7754 | 658.0458 | 656.3509 | 626.8313 | 788.6184 | -0.00174 | 548.6474 | 838.491  |
| YKL030W   | 0        | 0        | 0        | 0.895431 | 1.152263 | 0.978435 | #DIV/0!  | 0        | 0.878001 |
| YOL121C   | 18851.04 | 14737.68 | 17216.89 | 18744.95 | 17900.41 | 17089.34 | 0.080867 | 20196.52 | 17927.03 |
| YHR086W-1 | 4.60624  | 8.899564 | 5.928341 | 5.372586 | 9.218108 | 0        | -0.41355 | 8.99422  | 7.90201  |
| YIL084C   | 226.8573 | 301.5963 | 231.2053 | 188.0405 | 251.1934 | 307.2285 | -0.02528 | 205.7428 | 300.2764 |
| YBR088C   | 260.2525 | 203.7011 | 231.2053 | 251.6161 | 281.1523 | 226.0184 | 0.126352 | 313.6734 | 219.5003 |
| YKL166C   | 1532.726 | 1446.674 | 1425.766 | 1644.907 | 1472.593 | 1519.509 | 0.073998 | 1413.217 | 1459.238 |
| YER116C   | 342.0133 | 366.8598 | 441.6614 | 402.0485 | 399.8354 | 483.3467 | 0.159723 | 385.6272 | 403.0025 |
| YGL041W-1 | 17.2734  | 17.79913 | 34.58199 | 15.22233 | 27.65432 | 17.61182 | -0.20356 | 19.11272 | 21.95003 |
| YNL161W   | 1161.924 | 1315.158 | 1380.315 | 1290.316 | 1308.971 | 1725.959 | 0.165155 | 992.737  | 1310.856 |
| YDR495C   | 593.0534 | 406.4134 | 555.2879 | 417.2709 | 520.8231 | 545.9666 | -0.06714 | 415.9827 | 486.4126 |
| Q0130     | 57.578   | 94.92868 | 43.4745  | 41.18983 | 23.04527 | 15.65496 | -1.29463 | 83.19653 | 57.94807 |
| YER129W   | 1259.807 | 1257.805 | 1395.136 | 1470.298 | 1418.436 | 1771.945 | 0.252358 | 1327.772 | 1558.452 |
| YMR100W   | 464.0787 | 536.9404 | 497.9806 | 453.9835 | 530.0412 | 542.0528 | 0.025828 | 509.2977 | 538.2147 |
| YER068W   | 1365.75  | 1269.671 | 1416.873 | 1292.107 | 1485.268 | 1484.285 | 0.072676 | 1265.936 | 1321.392 |
| YJR014W   | 5011.589 | 4229.271 | 4589.524 | 4821.001 | 4662.058 | 4179.873 | -0.01757 | 5149.191 | 4731.548 |
| YDR163W   | 827.9716 | 825.6818 | 885.2989 | 890.0584 | 708.642  | 709.3652 | -0.13755 | 812.8526 | 865.7091 |
| YLR272C   | 788.8186 | 644.724  | 748.9471 | 766.489  | 750.1235 | 945.1679 | 0.173727 | 638.5896 | 778.787  |
| YER171W   | 948.8854 | 1002.684 | 966.3196 | 1115.707 | 1048.56  | 1184.884 | 0.19887  | 992.737  | 958.7772 |
| YIL012W   | 23.0312  | 14.83261 | 9.880568 | 3.581724 | 14.97943 | 15.65496 | -0.48066 | 16.86416 | 14.92602 |
| YDR532C   | 295.9509 | 350.0495 | 271.7156 | 300.8648 | 394.0741 | 345.3875 | 0.180916 | 312.5491 | 344.1764 |
| YMR111C   | 479.0489 | 384.6589 | 516.7537 | 376.081  | 447.0782 | 409.9641 | -0.16283 | 346.2775 | 461.8286 |
| YDR176W   | 1059.435 | 900.8336 | 1161.955 | 1087.053 | 1163.786 | 1236.741 | 0.159653 | 914.0376 | 1148.425 |
| YMR245W   | 74.8514  | 90.97332 | 80.0326  | 88.64767 | 100.2469 | 52.83547 | -0.02442 | 76.45087 | 86.92211 |
| YER001W   | 3603.231 | 3528.183 | 3622.216 | 3927.36  | 4092.84  | 5265.936 | 0.305098 | 3527.983 | 3730.627 |
| YNL131W   | 3953.305 | 3957.339 | 3868.242 | 3854.831 | 3703.375 | 3397.125 | -0.10457 | 4456.636 | 3917.641 |
| YDR362C   | 601.1143 | 625.936  | 698.5562 | 700.2271 | 646.4198 | 622.2845 | 0.0321   | 566.6358 | 613.7228 |
| YPL207W   | 2383.729 | 2732.166 | 2606.494 | 2962.981 | 2755.062 | 3048.803 | 0.183011 | 2664.538 | 3037.884 |
| YGL072C   | 1.15156  | 0        | 1.976114 | 0        | 0        | 0.978435 | -1.67654 | 0        | 3.512004 |
| YGR064W   | 3.45468  | 4.944202 | 0.988057 | 1.790862 | 1.152263 | 1.956869 | -0.93787 | 3.372832 | 0.878001 |
| YMR288W   | 460.624  | 540.8957 | 557.264  | 539.0495 | 594.5679 | 808.1871 | 0.316977 | 490.185  | 550.5067 |
| YDR268W   | 469.8365 | 579.4605 | 478.2195 | 444.1338 | 488.5597 | 383.5464 | -0.21477 | 591.37   | 460.9506 |
| YJL022W   | 0        | 0        | 0.988057 | 1.790862 | 0        | 0.978435 | 1.486854 | 0        | 0        |
| YCL005W   | 603.4174 | 668.4561 | 597.7744 | 575.7621 | 678.6832 | 505.8507 | -0.08695 | 608.2341 | 603.1867 |
| YDL061C   | 8434.025 | 6926.827 | 7499.351 | 8109.023 | 7963.293 | 7820.629 | 0.063746 | 10424.3  | 9001.267 |
| YKR094C   | 22951.74 | 18074.03 | 20579.25 | 21812.7  | 22266.34 | 20297.63 | 0.06349  | 25381.69 | 22488.24 |
| YNL223W   | 186.5527 | 136.46   | 106.7101 | 105.6609 | 137.1194 | 90.01599 | -0.36877 | 134.9133 | 140.4802 |

|           |          |          |          |          |          |          |          |          |          |
|-----------|----------|----------|----------|----------|----------|----------|----------|----------|----------|
| YER063W   | 4040.824 | 3417.433 | 3860.338 | 3841.399 | 3524.774 | 3630.971 | -0.04157 | 3670.766 | 3729.749 |
| YOR322C   | 1169.985 | 1244.95  | 1179.74  | 1109.439 | 1054.321 | 1166.294 | -0.11032 | 997.2341 | 1287.15  |
| YLR131C   | 798.031  | 826.6706 | 799.338  | 889.163  | 783.5392 | 872.7638 | 0.070516 | 674.5665 | 879.7571 |
| YIL124W   | 2328.454 | 2077.554 | 2272.531 | 2177.688 | 2344.856 | 2114.397 | -0.00901 | 2363.231 | 2088.765 |
| YMR184W   | 1058.284 | 839.5255 | 997.9374 | 890.0584 | 922.963  | 801.338  | -0.14748 | 928.6532 | 802.493  |
| YDL177C   | 459.4724 | 533.9738 | 488.1001 | 497.8597 | 441.3169 | 393.3308 | -0.15296 | 423.8526 | 477.6326 |
| YKR079C   | 1264.413 | 1148.044 | 1239.023 | 1320.761 | 1379.259 | 1606.59  | 0.238071 | 1346.884 | 1249.396 |
| YHR025W   | 5672.584 | 5316.995 | 5529.166 | 6122.957 | 5859.26  | 5161.243 | 0.053554 | 5801.272 | 5728.079 |
| YPL212C   | 2746.47  | 3233.508 | 2777.428 | 3141.172 | 3278.19  | 3406.91  | 0.16614  | 2693.769 | 3114.27  |
| YPL037C   | 21509.99 | 18826.53 | 20631.61 | 21968.5  | 21860.74 | 19837.76 | 0.062491 | 24210.19 | 21405.67 |
| YIL020C-f | 1.15156  | 0.98884  | 2.96417  | 1.790862 | 3.45679  | 1.956869 | 0.497113 | 1.124277 | 6.146008 |
| YDR060W   | 4901.039 | 4492.302 | 5512.369 | 5828.361 | 6431.935 | 8080.892 | 0.448539 | 5714.702 | 6152.154 |
| YPL255W   | 498.6255 | 476.6211 | 493.0404 | 480.8465 | 473.5803 | 493.1311 | -0.02051 | 424.9769 | 442.5125 |
| YNL088W   | 1631.76  | 1277.582 | 1626.342 | 1565.213 | 1665.021 | 1927.516 | 0.185422 | 1425.584 | 1478.554 |
| YBL029W   | 594.2049 | 637.8021 | 552.3238 | 695.7499 | 622.2223 | 570.4274 | 0.081781 | 522.789  | 547.8727 |
| YHR006W   | 626.4486 | 570.5609 | 608.643  | 499.6505 | 566.9136 | 589.0177 | -0.12518 | 517.1676 | 604.9427 |
| YIL147C   | 989.19   | 892.9229 | 1079.946 | 939.3071 | 1019.753 | 1170.208 | 0.079225 | 974.7486 | 1103.647 |
| YOL048C   | 148.5512 | 130.5269 | 139.316  | 77.9025  | 69.13581 | 89.03756 | -0.82561 | 136.0376 | 83.4101  |
| YOR316C   | 596.508  | 783.1616 | 662.9861 | 569.4941 | 585.3498 | 534.2254 | -0.27422 | 637.4653 | 654.1108 |
| YPR111W   | 297.1025 | 389.6031 | 337.9154 | 368.9176 | 329.5474 | 368.8699 | 0.058922 | 321.5434 | 320.4704 |
| YHR213W-f | 102.4888 | 80.09608 | 55.33118 | 113.7197 | 77.20165 | 84.14539 | 0.209329 | 100.0607 | 61.46008 |
| YER123W   | 961.5525 | 1049.16  | 1045.364 | 985.8696 | 1162.634 | 1270.987 | 0.162101 | 948.8902 | 1132.621 |
| YER105C   | 1649.034 | 1461.506 | 1846.678 | 1781.908 | 1746.831 | 2300.3   | 0.233727 | 1696.535 | 1752.49  |
| YPL007C   | 358.1351 | 392.5697 | 377.4377 | 386.8262 | 362.963  | 432.4681 | 0.067595 | 326.0405 | 359.1024 |
| YOR335C   | 5102.562 | 5748.129 | 5742.586 | 5882.086 | 5632.264 | 6236.543 | 0.097293 | 5660.737 | 6004.649 |
| YPR189W   | 915.4902 | 852.3805 | 1062.161 | 871.2544 | 978.2717 | 1215.216 | 0.114947 | 923.0318 | 910.4871 |
| YOL062C   | 1497.028 | 1551.491 | 1449.479 | 1451.494 | 1455.309 | 1367.852 | -0.07348 | 1452.567 | 1468.896 |
| YPR150W   | 2.30312  | 0        | 0        | 0        | 5.761317 | 0        | 1.322809 | 2.248555 | 1.756002 |
| YOR341W   | 5906.351 | 6068.514 | 6565.638 | 6746.177 | 7327.243 | 9794.131 | 0.36437  | 6790.636 | 7543.785 |
| YGR015C   | 237.2213 | 260.065  | 194.6472 | 222.0669 | 253.498  | 182.9673 | -0.07138 | 204.6185 | 201.9402 |
| YHR134W   | 538.9301 | 512.2193 | 496.0045 | 496.9642 | 367.572  | 416.8132 | -0.27195 | 480.0665 | 467.0966 |
| YBL080C   | 271.7681 | 318.4066 | 255.9067 | 250.7207 | 191.2757 | 343.4306 | -0.10732 | 233.8497 | 302.0324 |
| YPL165C   | 211.887  | 220.5114 | 159.0771 | 171.9228 | 194.7325 | 173.1829 | -0.13179 | 214.737  | 134.3342 |
| YOR038C   | 584.9924 | 571.5498 | 651.1294 | 574.8667 | 744.3622 | 802.3165 | 0.230983 | 652.0809 | 676.0608 |
| YMR064W   | 768.0905 | 801.9496 | 939.642  | 702.9134 | 803.1276 | 878.6344 | -0.07371 | 730.7804 | 922.7791 |
| YGR098C   | 693.2391 | 582.427  | 756.8515 | 713.6585 | 708.642  | 952.017  | 0.224245 | 562.1387 | 726.1069 |
| YGR099W   | 525.1113 | 508.264  | 529.5985 | 545.3175 | 640.6585 | 692.7318 | 0.265447 | 463.2023 | 600.5527 |
| YPR171W   | 968.4619 | 878.0903 | 1024.615 | 852.4503 | 969.0536 | 991.1544 | -0.0297  | 919.659  | 842.881  |
| YLR385C   | 8.06092  | 17.79913 | 18.77308 | 14.3269  | 16.13169 | 35.22365 | 0.557388 | 12.36705 | 18.43802 |
| YDL224C   | 1336.961 | 1323.068 | 1324.984 | 1281.362 | 1402.305 | 1462.76  | 0.057284 | 1371.619 | 1299.442 |
| YDR450W   | 30915.93 | 23317.85 | 27290.13 | 29153.44 | 28069.14 | 27232.77 | 0.050966 | 34461.35 | 28262.85 |
| YPR197C   | 2.30312  | 0        | 1.976114 | 0        | 1.152263 | 0.978435 | -1.00603 | 0        | 1.756002 |
| YBL012C   | 1.15156  | 13.84377 | 3.952227 | 6.268017 | 4.609054 | 5.870608 | -0.17805 | 3.372832 | 6.146008 |
| YKL214C   | 1038.707 | 871.1684 | 932.7256 | 1038.7   | 1017.449 | 902.1168 | 0.05754  | 1061.318 | 1058.869 |
| YJR134C   | 996.0993 | 905.7778 | 1102.671 | 1053.027 | 1004.774 | 1315.995 | 0.167224 | 905.0434 | 1151.937 |
| YIL086C   | 3.45468  | 5.933043 | 1.976114 | 2.686293 | 8.065844 | 7.827478 | 0.709271 | 7.869942 | 1.756002 |
| YHR193C   | 27539.56 | 21736.69 | 25525.46 | 27580.17 | 25209.22 | 23057.79 | 0.020024 | 29902.41 | 26107.36 |
| YNL087W   | 3759.843 | 3109.903 | 4175.528 | 3913.034 | 4070.947 | 5410.744 | 0.278236 | 3841.656 | 4095.875 |
| YFR043C   | 343.1649 | 414.3241 | 324.0826 | 361.7541 | 400.9877 | 279.8323 | -0.05298 | 350.7746 | 289.7404 |
| YKL170W   | 4.60624  | 0.98884  | 1.976114 | 0.895431 | 2.304527 | 0        | -1.24247 | 2.248555 | 0.878001 |
| YMR101C   | 14.97028 | 25.70985 | 32.60588 | 13.43147 | 28.80659 | 31.30991 | 0.005148 | 30.35549 | 30.73004 |
| YJR151W-f | 0        | 0.98884  | 0.988057 | 0.895431 | 0        | 0        | -1.14258 | 0        | 0        |
| YDR416W   | 469.8365 | 535.9515 | 496.9926 | 468.3104 | 521.9754 | 621.306  | 0.100852 | 498.0549 | 480.2666 |
| YDR304C   | 5778.528 | 4748.412 | 5391.826 | 5565.999 | 5340.741 | 4854.015 | -0.01439 | 6291.457 | 5442.729 |

|           |          |          |          |          |          |          |          |          |          |
|-----------|----------|----------|----------|----------|----------|----------|----------|----------|----------|
| YAL047C   | 392.6819 | 340.1611 | 367.5571 | 374.2902 | 373.3334 | 408.9857 | 0.071873 | 375.5087 | 335.3964 |
| YGR031W   | 422.6225 | 581.4382 | 434.745  | 377.8719 | 347.9836 | 325.8188 | -0.45218 | 433.9711 | 370.5165 |
| YBR107C   | 548.1425 | 660.5454 | 601.7266 | 527.4089 | 550.7819 | 500.9586 | -0.19717 | 598.1156 | 527.6786 |
| YOR252W   | 1513.15  | 1255.827 | 1339.805 | 1618.044 | 1508.313 | 1475.48  | 0.163499 | 1606.593 | 1529.478 |
| YBL066C   | 370.8023 | 444.9782 | 391.2705 | 332.2049 | 379.0947 | 436.3819 | -0.07276 | 346.2775 | 450.4146 |
| YGR024C   | 1342.719 | 1212.318 | 1083.898 | 1118.393 | 1175.309 | 988.2191 | -0.14898 | 1241.202 | 1151.937 |
| YPL125W   | 890.1558 | 817.771  | 947.5465 | 872.1498 | 1017.449 | 1255.332 | 0.244059 | 927.5289 | 1027.261 |
| YKL222C   | 216.4933 | 212.6007 | 229.2292 | 182.6679 | 214.321  | 200.5791 | -0.13969 | 176.5116 | 232.6703 |
| YPL127C   | 3793.238 | 3596.413 | 3612.336 | 3617.541 | 3646.914 | 3317.872 | -0.05611 | 3327.861 | 3255.628 |
| YKL196C   | 3615.898 | 3041.673 | 3335.68  | 3399.056 | 3213.663 | 2843.331 | -0.07972 | 3458.278 | 3067.736 |
| YDL173W   | 684.0266 | 981.9186 | 772.6604 | 679.6321 | 707.4898 | 717.1926 | -0.21271 | 648.7081 | 743.6669 |
| YGR232W   | 1024.888 | 904.789  | 1053.269 | 959.0066 | 812.3457 | 897.2246 | -0.16067 | 1023.093 | 1007.067 |
| YMR049C   | 3598.625 | 3677.498 | 4049.057 | 4515.659 | 5049.219 | 5825.6   | 0.442504 | 4411.665 | 4605.994 |
| YKL033W-f | 2183.358 | 1774.969 | 1973.149 | 1918.909 | 1935.803 | 1940.236 | -0.0336  | 2313.763 | 1827.12  |
| YMR284W   | 234.9182 | 227.4333 | 257.8828 | 194.3085 | 197.0371 | 200.5791 | -0.28305 | 200.1214 | 232.6703 |
| YMR108W   | 5661.069 | 6107.079 | 5569.676 | 6039.682 | 5876.544 | 6195.449 | 0.062997 | 5582.038 | 6045.915 |
| YMR054W   | 1968.016 | 1843.199 | 2107.525 | 1891.15  | 1935.803 | 2512.62  | 0.099096 | 1925.887 | 1964.088 |
| YLR067C   | 423.7741 | 494.4202 | 490.0762 | 455.7744 | 482.7984 | 625.2198 | 0.151125 | 464.3266 | 539.0927 |
| YKR101W   | 293.6478 | 320.3843 | 265.7873 | 256.0933 | 213.1687 | 272.0049 | -0.24721 | 267.578  | 253.7423 |
| YKL074C   | 847.5481 | 846.4474 | 752.8993 | 816.6331 | 772.0165 | 849.2813 | -0.00529 | 816.2254 | 790.201  |
| YKR010C   | 743.9077 | 584.4047 | 681.7592 | 676.9459 | 730.535  | 755.3516 | 0.105675 | 644.211  | 704.1569 |
| YJL067W   | 16.12184 | 12.85493 | 19.76114 | 14.3269  | 17.28395 | 8.805912 | -0.27009 | 20.23699 | 14.04802 |
| YBR201W   | 331.6493 | 294.6744 | 294.4409 | 276.6882 | 304.1976 | 340.4953 | 0.000965 | 314.7977 | 327.4944 |
| YIR008C   | 639.1158 | 654.6124 | 580.9774 | 627.6971 | 583.0453 | 585.104  | -0.062   | 630.7197 | 633.0388 |
| YBR116C   | 1.15156  | 2.966521 | 0        | 0        | 1.152263 | 0        | -1.8375  | 1.124277 | 1.756002 |
| YAL016C-f | 6.90936  | 3.955362 | 4.940284 | 4.477155 | 6.913581 | 5.870608 | 0.127163 | 4.49711  | 5.268006 |
| YOL035C   | 1.15156  | 2.966521 | 0        | 1.790862 | 0        | 0.978435 | -0.57245 | 2.248555 | 0        |
| YJL064W   | 0        | 0        | 0.988057 | 0        | 1.152263 | 1.956869 | 1.653846 | 0        | 0        |
| YJR135C   | 117.4591 | 135.4711 | 135.3638 | 180.8771 | 127.9012 | 148.7221 | 0.236623 | 133.789  | 134.3342 |
| YGR035C   | 1879.346 | 2000.424 | 1535.44  | 1601.031 | 1134.98  | 851.2382 | -0.59414 | 1615.587 | 1260.81  |
| YFL010W-f | 29.94056 | 27.68753 | 21.73725 | 23.28121 | 19.58848 | 17.61182 | -0.39201 | 21.36127 | 21.95003 |
| YMR102C   | 836.0325 | 833.5925 | 824.0394 | 825.5874 | 736.2964 | 907.009  | -0.0144  | 758.8873 | 844.637  |
| YKL141W   | 3021.693 | 3181.1   | 3098.546 | 2658.535 | 2737.778 | 2575.24  | -0.22258 | 3454.905 | 3017.69  |
| YDL080C   | 703.6031 | 818.7599 | 838.8602 | 928.562  | 803.1276 | 833.6264 | 0.119602 | 583.5    | 794.591  |
| YDR128W   | 918.9448 | 919.6216 | 892.2153 | 851.5549 | 932.1811 | 957.8876 | 0.005717 | 790.3671 | 907.8531 |
| YHR079C-f | 4.60624  | 0.98884  | 5.928341 | 0        | 6.913581 | 0        | -0.73706 | 2.248555 | 1.756002 |
| YLR262C   | 330.4977 | 297.641  | 356.6885 | 305.342  | 298.4362 | 306.2501 | -0.11396 | 330.5376 | 335.3964 |
| YCR026C   | 1293.202 | 1202.43  | 1248.904 | 1176.596 | 1234.074 | 1307.189 | -0.01031 | 1173.746 | 1203.739 |
| YDL211C   | 147.3997 | 221.5003 | 206.5039 | 192.5177 | 268.4774 | 195.6869 | 0.19062  | 209.1156 | 179.9902 |
| YGR153W   | 63.3358  | 62.29695 | 54.34313 | 46.56241 | 50.69959 | 61.64139 | -0.17965 | 64.08382 | 57.94807 |
| YGR069W   | 17.2734  | 8.899564 | 4.940284 | 8.95431  | 25.3498  | 10.76278 | 0.534539 | 4.49711  | 23.70603 |
| YBR036C   | 2594.465 | 3074.305 | 2832.759 | 2743.601 | 2602.963 | 2394.23  | -0.13524 | 2789.332 | 2700.731 |
| YDR010C   | 34.5468  | 38.56478 | 17.78502 | 12.53603 | 13.82716 | 17.61182 | -1.04754 | 24.7341  | 32.48604 |
| YKL022C   | 662.147  | 736.6861 | 698.5562 | 664.4098 | 591.1112 | 713.2789 | -0.09128 | 583.5    | 631.2828 |
| Q0250     | 2.30312  | 0        | 5.928341 | 0        | 0        | 0.978435 | -3.0726  | 0        | 1.756002 |
| YJL195C   | 0        | 0        | 2.96417  | 0        | 0        | 0.978435 | -1.59908 | 0        | 1.756002 |
| YHR117W   | 1598.365 | 1763.102 | 1698.47  | 1685.201 | 1660.412 | 1785.643 | 0.020193 | 1475.052 | 1593.572 |
| YJL093C   | 572.3253 | 649.6682 | 546.3954 | 524.7226 | 550.7819 | 565.5353 | -0.10783 | 514.9191 | 571.5787 |
| YIL047C   | 1425.631 | 2204.125 | 1942.52  | 2048.746 | 2018.766 | 2576.219 | 0.253727 | 1667.304 | 1981.648 |
| YDR087C   | 2838.595 | 2865.66  | 2584.757 | 3259.369 | 3172.181 | 2692.652 | 0.138498 | 3339.104 | 2880.722 |
| YDL196W   | 4.60624  | 15.82145 | 7.904455 | 7.163448 | 1.152263 | 7.827478 | -0.81151 | 4.49711  | 9.658012 |
| YGR077C   | 657.5407 | 619.0141 | 579.0013 | 641.1286 | 653.3334 | 668.2709 | 0.081012 | 612.7312 | 605.8207 |
| YGR270W   | 1583.395 | 1422.941 | 1781.466 | 1606.403 | 1533.663 | 1890.336 | 0.07131  | 1564.994 | 1633.082 |
| YDR152W   | 3083.878 | 2822.151 | 2746.798 | 2922.687 | 2796.543 | 2665.256 | -0.04545 | 2974.838 | 2983.448 |

|           |          |          |          |          |          |          |          |          |          |
|-----------|----------|----------|----------|----------|----------|----------|----------|----------|----------|
| YOR082C   | 0        | 1.977681 | 0        | 0        | 0        | 0        | #NUM!    | 0        | 0.878001 |
| YOR087W   | 772.6967 | 800.9608 | 774.6366 | 779.025  | 808.889  | 723.0633 | -0.02311 | 719.5376 | 739.2769 |
| YBR043C   | 529.7176 | 629.8914 | 575.0491 | 525.618  | 562.3046 | 522.4841 | -0.10723 | 477.8179 | 548.7507 |
| YCL041C   | 6.90936  | 1.977681 | 1.976114 | 1.790862 | 4.609054 | 0        | -0.76332 | 3.372832 | 2.634003 |
| YPR066W   | 191.1589 | 217.5449 | 223.3008 | 145.0598 | 134.8148 | 147.7436 | -0.56361 | 167.5173 | 147.5042 |
| YDR058C   | 398.4397 | 337.1946 | 345.8199 | 345.6364 | 339.9177 | 331.6894 | -0.08831 | 459.8295 | 341.5424 |
| YBR024W   | 833.7294 | 699.1102 | 805.2663 | 727.9854 | 710.9466 | 560.6431 | -0.22565 | 782.4971 | 790.201  |
| YLR334C   | 6.90936  | 1.977681 | 0        | 2.686293 | 1.152263 | 0        | -1.21114 | 6.745665 | 0        |
| YPR159W   | 2348.031 | 2759.854 | 2957.254 | 2866.275 | 2960.165 | 3173.064 | 0.158146 | 2607.199 | 2676.147 |
| YPR130C   | 3.45468  | 1.977681 | 5.928341 | 8.058879 | 2.304527 | 1.956869 | 0.116983 | 3.372832 | 2.634003 |
| YPR002W   | 96.73103 | 144.3707 | 145.2444 | 73.42534 | 73.74486 | 91.97286 | -0.69202 | 114.6763 | 91.31211 |
| YPL179W   | 2295.059 | 2257.523 | 2412.835 | 2137.394 | 2318.354 | 2638.838 | 0.026509 | 2102.399 | 2281.047 |
| YPR163C   | 7771.878 | 7674.391 | 7951.881 | 8879.989 | 8495.639 | 7921.407 | 0.112574 | 8276.931 | 8025.808 |
| YMR179W   | 581.5378 | 578.4717 | 696.5801 | 733.358  | 799.6708 | 889.3972 | 0.383798 | 608.2341 | 743.6669 |
| YBR131W   | 257.9494 | 222.4891 | 225.277  | 248.9298 | 244.2799 | 234.8243 | 0.044919 | 231.6012 | 211.5983 |
| YNR064C   | 116.3076 | 114.7055 | 128.4474 | 143.269  | 118.6831 | 134.0456 | 0.139659 | 156.2746 | 92.19011 |
| YDR222W   | 452.5631 | 592.3154 | 517.7418 | 715.4494 | 622.2223 | 574.3412 | 0.291125 | 558.7659 | 577.7247 |
| YHL015W   | 58053.59 | 48951.56 | 55769.88 | 57706.95 | 58597.21 | 54525.23 | 0.069677 | 67927.72 | 60466.18 |
| YER029C   | 829.1232 | 935.4431 | 753.8874 | 952.7386 | 928.7244 | 823.842  | 0.103253 | 980.37   | 848.149  |
| YPL034W   | 127.8232 | 111.739  | 83.98483 | 120.8832 | 109.465  | 91.97286 | -0.00548 | 121.422  | 93.94611 |
| YGR030C   | 375.4085 | 357.9602 | 356.6885 | 306.2374 | 324.9383 | 253.4146 | -0.30132 | 353.0231 | 278.3263 |
| YHR009C   | 3435.103 | 3760.56  | 3481.912 | 3522.626 | 3332.346 | 3620.208 | -0.02761 | 3811.301 | 3450.544 |
| YMR038C   | 4448.476 | 4625.796 | 4661.652 | 5387.808 | 4853.334 | 4671.047 | 0.118538 | 4628.65  | 4329.423 |
| YER010C   | 799.1826 | 790.0835 | 899.1317 | 764.6981 | 823.8684 | 806.2302 | -0.05531 | 820.7226 | 820.931  |
| YPR126C   | 28.789   | 22.74333 | 20.74919 | 31.34009 | 16.13169 | 24.46087 | -0.00698 | 19.11272 | 21.95003 |
| YDR212W   | 2936.478 | 3534.116 | 2839.675 | 3117.891 | 3123.786 | 2697.545 | -0.05867 | 3323.364 | 3156.414 |
| YBL032W   | 2475.854 | 2608.561 | 2597.601 | 2566.305 | 2688.231 | 2486.203 | 0.010986 | 2620.691 | 2553.227 |
| YNL253W   | 511.2926 | 459.8108 | 418.9361 | 439.6566 | 419.4239 | 474.5408 | -0.05978 | 482.315  | 359.9804 |
| YNL248C   | 4008.58  | 3810.991 | 4082.651 | 4717.131 | 4771.523 | 4868.691 | 0.270558 | 4309.356 | 4483.951 |
| YGL154C   | 290.1931 | 299.6187 | 303.3334 | 250.7207 | 243.1276 | 250.4793 | -0.26296 | 273.1994 | 265.1563 |
| YLR171W   | 2.30312  | 2.966521 | 1.976114 | 5.372586 | 0        | 0.978435 | -0.19015 | 6.745665 | 1.756002 |
| YBR187W   | 3531.834 | 3919.763 | 3525.387 | 4044.662 | 4095.144 | 3565.416 | 0.092671 | 4157.578 | 3459.324 |
| YBR295W   | 396.1366 | 354.0049 | 327.0468 | 308.9237 | 324.9383 | 347.3443 | -0.13464 | 355.2717 | 316.0804 |
| YPL254W   | 956.9463 | 1053.115 | 954.4629 | 973.3335 | 1005.926 | 1009.745 | 0.011864 | 970.2515 | 973.7032 |
| YLR091W   | 596.508  | 655.6012 | 585.9177 | 662.619  | 520.8231 | 560.6431 | -0.07569 | 590.2457 | 561.9207 |
| YLR154W-I | 0        | 0        | 0.988057 | 0        | 0        | 1.956869 | 0.985882 | 2.248555 | 0.878001 |
| YDR372C   | 2208.692 | 1954.938 | 2052.194 | 2062.178 | 2048.724 | 1981.33  | -0.02897 | 1923.639 | 1910.53  |
| YDR320W-I | 6.90936  | 1.977681 | 0        | 0        | 2.304527 | 1.956869 | -1.06038 | 2.248555 | 0.878001 |
| YNL222W   | 491.7161 | 532.985  | 452.53   | 547.1084 | 462.0577 | 488.2389 | 0.019569 | 519.4162 | 491.6806 |
| YCR018C   | 77.15452 | 71.19651 | 57.3073  | 39.39897 | 39.17696 | 30.33148 | -0.91715 | 44.9711  | 43.02205 |
| YLL004W   | 437.5928 | 407.4023 | 442.6495 | 427.1206 | 528.8889 | 522.4841 | 0.199394 | 464.3266 | 495.1926 |
| YDR190C   | 3146.062 | 3568.725 | 3291.217 | 3498.449 | 3604.28  | 3456.81  | 0.077681 | 3294.133 | 3478.64  |
| YLR282C   | 1.15156  | 0.98884  | 1.976114 | 1.790862 | 0        | 2.935304 | 0.199247 | 2.248555 | 0.878001 |
| YDL007C-I | 4.60624  | 0        | 0        | 0        | 0        | 0        | #NUM!    | 0        | 0        |
| YEL046C   | 5344.39  | 7344.118 | 6296.886 | 6551.869 | 6864.033 | 6944.93  | 0.100907 | 6283.587 | 6133.716 |
| YPL082C   | 1183.804 | 1108.49  | 1240.999 | 1167.642 | 1314.733 | 1598.762 | 0.207958 | 1142.266 | 1350.366 |
| YLR306W   | 272.9197 | 382.6812 | 288.5126 | 274.0019 | 240.8231 | 254.393  | -0.29557 | 346.2775 | 240.5723 |
| YIL115C   | 1159.621 | 1191.553 | 1582.867 | 1381.65  | 1405.761 | 1978.395 | 0.276709 | 1174.87  | 1416.216 |
| YHR145C   | 20.72808 | 19.77681 | 34.58199 | 17.90862 | 14.97943 | 20.54713 | -0.49077 | 21.36127 | 23.70603 |
| YOR011W-I | 0        | 1.977681 | 0        | 0        | 2.304527 | 0.978435 | 0.731188 | 3.372832 | 0        |
| YDR506C   | 209.5839 | 185.902  | 254.9187 | 212.2172 | 221.2346 | 194.7085 | -0.0502  | 222.6069 | 188.7702 |
| YDR065W   | 302.8603 | 403.4469 | 392.2586 | 334.8912 | 270.7819 | 353.2149 | -0.19619 | 312.5491 | 366.1264 |
| YLR201C   | 921.248  | 906.7667 | 928.7734 | 818.424  | 869.9589 | 627.1767 | -0.25163 | 878.0607 | 878.0011 |
| YML084W   | 2.30312  | 0        | 0        | 0.895431 | 0        | 0        | -1.36294 | 1.124277 | 0        |

|                   |          |          |          |          |          |          |          |          |          |
|-------------------|----------|----------|----------|----------|----------|----------|----------|----------|----------|
| YPR155C           | 324.7399 | 284.786  | 290.4887 | 198.7857 | 260.4115 | 250.4793 | -0.34279 | 249.5896 | 273.9363 |
| YBR155W           | 1742.31  | 1782.879 | 1905.962 | 2055.014 | 1939.259 | 2166.254 | 0.181796 | 2023.699 | 1949.162 |
| YHR039C- <i>t</i> | 7700.481 | 5891.511 | 6720.763 | 7128.526 | 7044.939 | 6515.397 | 0.026468 | 8347.76  | 7286.531 |
| YDR361C           | 2132.689 | 2293.121 | 2081.836 | 2221.564 | 2188.148 | 2143.75  | 0.010122 | 2446.428 | 2079.985 |
| YFL009W           | 810.6982 | 855.347  | 838.8602 | 771.8615 | 1023.21  | 913.858  | 0.112967 | 733.0289 | 910.4871 |
| YBR204C           | 408.8038 | 397.5139 | 468.3389 | 385.0353 | 415.9671 | 416.8132 | -0.06581 | 365.3902 | 400.3685 |
| YLL030C           | 0        | 1.977681 | 1.976114 | 0        | 0        | 0        | #NUM!    | 0        | 0        |
| YGL219C           | 642.5704 | 604.1815 | 588.8819 | 530.0952 | 515.0618 | 529.3332 | -0.22139 | 579.0029 | 514.5086 |
| YOR284W           | 270.6166 | 250.1766 | 283.5723 | 281.1653 | 260.4115 | 226.0184 | -0.06751 | 274.3237 | 240.5723 |
| YIR010W           | 657.5407 | 790.0835 | 744.9948 | 850.6595 | 789.3005 | 856.1304 | 0.187015 | 679.0636 | 765.6169 |
| YPR007C           | 26.48588 | 25.70985 | 30.62976 | 11.6406  | 11.52263 | 21.52556 | -0.89016 | 16.86416 | 17.56002 |
| YLR347C           | 1809.101 | 2041.955 | 2200.403 | 2162.466 | 2182.387 | 2643.731 | 0.207717 | 1910.147 | 2314.411 |
| YBR084C- <i>t</i> | 33322.69 | 26068.8  | 29787.94 | 32654.58 | 30617.94 | 30190.58 | 0.067686 | 37041.57 | 31960.12 |
| YBL113C           | 77.15452 | 73.17419 | 76.08038 | 128.0466 | 120.9877 | 127.1965 | 0.732686 | 91.06648 | 99.21412 |
| YML072C           | 9297.695 | 6752.791 | 9427.05  | 8708.067 | 9568.396 | 12490.7  | 0.272166 | 8805.341 | 9984.628 |
| YDR477W           | 1784.918 | 1689.928 | 1838.774 | 1886.673 | 1992.264 | 2539.038 | 0.272423 | 1831.448 | 2154.615 |
| YBL061C           | 1006.463 | 1121.345 | 1277.557 | 1039.595 | 1066.996 | 1435.364 | 0.056736 | 970.2515 | 1119.451 |
| YDR204W           | 849.8512 | 836.559  | 786.4932 | 782.6067 | 652.1811 | 669.2493 | -0.23305 | 930.9018 | 777.909  |
| YMR094W           | 82.91232 | 62.29695 | 103.746  | 68.94819 | 110.6173 | 164.377  | 0.466281 | 75.32659 | 82.5321  |
| YMR161W           | 1111.255 | 1395.254 | 1221.238 | 1147.047 | 1128.066 | 1114.437 | -0.13721 | 1173.746 | 1176.521 |
| YDR536W           | 184.2496 | 241.2771 | 182.7905 | 92.2294  | 125.5967 | 48.92174 | -1.18935 | 213.6127 | 156.2842 |
| YLR027C           | 6310.548 | 6123.889 | 6443.119 | 6198.174 | 6148.478 | 5901.918 | -0.04889 | 6437.613 | 5664.863 |
| YIR001C           | 1006.463 | 992.7958 | 934.7018 | 930.3528 | 1070.453 | 1046.925 | 0.054886 | 792.6156 | 1046.577 |
| YBL023C           | 698.9969 | 738.6638 | 789.4574 | 753.0575 | 890.6997 | 1020.507 | 0.258559 | 698.1763 | 813.907  |
| YGL206C           | 4179.011 | 3452.042 | 4298.047 | 3742.902 | 3724.116 | 4733.667 | 0.032477 | 4129.471 | 4191.577 |
| YOL071W           | 900.5199 | 778.2174 | 802.3021 | 747.6849 | 704.033  | 585.104  | -0.28462 | 878.0607 | 798.103  |
| YNL205C           | 2.30312  | 0        | 0        | 0        | 0        | 1.956869 | -0.23504 | 1.124277 | 0        |
| YDL034W           | 3.45468  | 9.888404 | 5.928341 | 0.895431 | 3.45679  | 11.74122 | -0.25999 | 10.1185  | 2.634003 |
| YPR034W           | 2976.782 | 3217.687 | 3086.69  | 3270.114 | 3025.844 | 3007.708 | 0.003494 | 2808.445 | 3049.298 |
| YNL186W           | 2658.952 | 2785.564 | 2804.105 | 3251.31  | 3316.214 | 3909.825 | 0.345049 | 2781.462 | 3396.986 |
| YPR135W           | 582.6893 | 608.1369 | 716.3412 | 658.1418 | 565.7614 | 737.7398 | 0.040631 | 517.1676 | 641.8188 |
| YMR315W           | 2301.968 | 2232.802 | 2312.053 | 2093.518 | 2130.535 | 2111.462 | -0.11197 | 2403.705 | 2182.711 |
| YNL210W           | 101.3373 | 68.22999 | 35.57005 | 48.35328 | 86.41976 | 36.20208 | -0.2628  | 69.7052  | 51.80206 |
| YPR134W           | 313.2243 | 255.1208 | 293.4529 | 211.3217 | 268.4774 | 210.3635 | -0.32041 | 254.0867 | 219.5003 |
| YDR438W           | 177.3402 | 189.8574 | 235.1575 | 148.6416 | 160.1646 | 207.4282 | -0.22259 | 187.7543 | 190.5262 |
| YJR095W           | 49.51708 | 53.39738 | 56.31924 | 41.18983 | 23.04527 | 17.61182 | -0.96015 | 34.8526  | 36.87605 |
| YJR099W           | 485.9583 | 508.264  | 527.6223 | 449.5064 | 473.5803 | 391.3739 | -0.21135 | 483.4393 | 431.0985 |
| YJL011C           | 1287.444 | 1119.367 | 1169.859 | 1253.603 | 1159.177 | 1079.213 | -0.03457 | 1297.416 | 1132.621 |
| YOR016C           | 945.4307 | 822.7152 | 855.6572 | 867.6727 | 879.177  | 707.4083 | -0.09637 | 943.2688 | 773.5189 |
| YHR187W           | 779.6061 | 832.6036 | 753.8874 | 767.3844 | 743.2099 | 638.9179 | -0.1385  | 719.5376 | 770.0069 |
| YOR100C           | 43.75928 | 66.25231 | 37.54616 | 21.49034 | 25.3498  | 29.35304 | -0.95355 | 52.84104 | 30.73004 |
| YOL026C           | 1265.564 | 1070.914 | 1205.429 | 1164.06  | 1063.539 | 980.3916 | -0.14286 | 1280.552 | 1030.773 |
| YER023W           | 2111.961 | 1865.942 | 1891.141 | 1926.968 | 1711.111 | 1652.576 | -0.14968 | 2058.552 | 1669.08  |
| YOR218C           | 6.90936  | 0.98884  | 1.976114 | 0        | 3.45679  | 3.913739 | -0.42191 | 2.248555 | 1.756002 |
| YNL107W           | 755.4233 | 831.6148 | 760.8038 | 712.7631 | 669.4651 | 690.7749 | -0.17961 | 609.3584 | 769.1289 |
| YCRO32W           | 629.9033 | 571.5498 | 543.4313 | 579.3439 | 566.9136 | 634.0257 | 0.028975 | 595.8671 | 633.0388 |
| YDL058W           | 1158.469 | 1053.115 | 1305.223 | 1218.682 | 1342.387 | 1728.894 | 0.286699 | 1242.327 | 1360.024 |
| YGL079W           | 540.0816 | 485.5207 | 455.4942 | 436.0749 | 421.7284 | 419.7485 | -0.21328 | 466.5752 | 507.4846 |
| YIL070C           | 1435.995 | 1411.075 | 1150.098 | 1303.748 | 1235.226 | 1105.631 | -0.13322 | 1666.179 | 1239.738 |
| YBR103C- <i>t</i> | 0        | 0        | 0        | 3.581724 | 1.152263 | 2.935304 | #DIV/0!  | 1.124277 | 3.512004 |
| YLR167W           | 96676.91 | 67592.19 | 82188.54 | 87632.25 | 85344.7  | 82674.8  | 0.05284  | 112036.5 | 91327.04 |
| YBR161W           | 589.5987 | 643.7351 | 679.7831 | 591.8799 | 682.14   | 564.5568 | -0.05734 | 587.9971 | 618.9908 |
| YNL312W           | 1308.172 | 1396.243 | 1237.047 | 1216.891 | 1290.535 | 1133.027 | -0.11461 | 1378.364 | 1151.059 |
| YGR056W           | 739.3015 | 691.1995 | 855.6572 | 726.1946 | 775.4733 | 926.5777 | 0.086989 | 731.9046 | 848.149  |

|           |          |          |          |          |          |          |          |          |          |
|-----------|----------|----------|----------|----------|----------|----------|----------|----------|----------|
| YGL140C   | 1050.223 | 1158.921 | 1223.214 | 1070.936 | 1183.375 | 1306.21  | 0.052888 | 1146.763 | 1237.982 |
| YGL002W   | 568.8706 | 491.4537 | 491.0642 | 554.2718 | 558.8478 | 450.08   | 0.010942 | 628.4711 | 507.4846 |
| YFL039C   | 35912.55 | 32503.19 | 34469.35 | 35509.21 | 35273.09 | 32733.53 | 0.008818 | 39396.93 | 35458.07 |
| YGR032W   | 669.0563 | 892.9229 | 677.807  | 592.7753 | 686.749  | 621.306  | -0.23673 | 548.6474 | 651.4768 |
| YFL047W   | 852.1544 | 1038.282 | 1009.794 | 879.3133 | 916.0495 | 1054.753 | -0.02515 | 978.1214 | 923.6571 |
| YBL019W   | 259.101  | 328.295  | 286.5365 | 289.2242 | 337.6132 | 280.8108 | 0.054611 | 323.7919 | 278.3263 |
| YJR075W   | 2648.588 | 2425.626 | 2541.282 | 2835.83  | 2657.12  | 2849.202 | 0.131482 | 2646.549 | 2699.853 |
| YOL072W   | 508.9895 | 614.0699 | 541.4551 | 600.8342 | 539.2593 | 563.5784 | 0.033546 | 523.9133 | 582.9927 |
| YDR120C   | 2817.867 | 3121.769 | 2793.237 | 3077.596 | 3395.72  | 3330.592 | 0.166901 | 3275.02  | 3380.304 |
| YHR002W   | 263.7072 | 246.2213 | 184.7666 | 143.269  | 192.428  | 201.5576 | -0.37077 | 214.737  | 193.1602 |
| YGR105W   | 1058.284 | 967.0859 | 1054.257 | 1016.314 | 1229.465 | 899.1815 | 0.030287 | 1231.084 | 977.2152 |
| YAL037C-I | 0        | 0.98884  | 0        | 2.686293 | 1.152263 | 0        | 1.956754 | 2.248555 | 0.878001 |
| YBR085C-I | 2189.115 | 2247.634 | 2310.077 | 1886.673 | 1892.017 | 1617.353 | -0.32231 | 2312.639 | 2177.443 |
| YPL079W   | 19895.5  | 15356.69 | 19029.97 | 20857.27 | 18778.44 | 17167.62 | 0.065497 | 20991.38 | 19812.97 |
| YKL066W   | 96.73103 | 59.33043 | 69.16398 | 77.00707 | 85.2675  | 73.3826  | 0.06532  | 102.3093 | 73.75209 |
| YER011W   | 16295.72 | 16760.85 | 14691.42 | 17537.91 | 16594.9  | 12177.6  | -0.0441  | 14336.79 | 12211.24 |
| YHL017W   | 590.7502 | 763.3848 | 659.0339 | 673.3641 | 753.5803 | 690.7749 | 0.073043 | 682.4364 | 666.4028 |
| YEL051W   | 6584.62  | 5633.424 | 6245.507 | 6569.777 | 6458.437 | 6538.879 | 0.083749 | 7008.746 | 5947.579 |
| YKL018W   | 819.9107 | 691.1995 | 738.0784 | 805.8879 | 722.4692 | 686.8612 | -0.02196 | 829.7168 | 623.3808 |
| YNL042W   | 466.3818 | 436.0786 | 439.6853 | 456.6698 | 496.6256 | 467.6918 | 0.082352 | 469.948  | 492.5586 |
| YNL238W   | 1930.014 | 1877.808 | 2045.278 | 2064.864 | 2106.338 | 2535.124 | 0.196322 | 1847.188 | 2170.419 |
| YDR405W   | 2918.053 | 2440.458 | 3004.681 | 2820.608 | 2510.782 | 2469.569 | -0.1004  | 2870.28  | 3085.296 |
| YML114C   | 1146.954 | 1120.356 | 1224.202 | 1315.388 | 1153.416 | 1231.849 | 0.083928 | 1050.075 | 1263.444 |
| YFL032W   | 0        | 0        | 3.952227 | 0.895431 | 0        | 0        | -2.14201 | 0        | 0        |
| YJR086W   | 631.0548 | 574.5163 | 585.9177 | 508.6048 | 578.4363 | 566.5137 | -0.11559 | 662.1994 | 614.6008 |
| YIL002W-I | 913.187  | 806.8938 | 834.908  | 804.9925 | 1040.494 | 884.505  | 0.095579 | 1261.439 | 882.3911 |
| YGL134W   | 401.8944 | 443.9894 | 466.3628 | 405.6303 | 376.7902 | 373.7621 | -0.18267 | 366.5145 | 349.4444 |
| YMR119W-I | 17.2734  | 15.82145 | 10.86863 | 8.95431  | 25.3498  | 6.849043 | -0.0953  | 15.73988 | 10.53601 |
| YOR257W   | 679.4204 | 614.0699 | 539.479  | 617.8474 | 562.3046 | 445.1878 | -0.17344 | 703.7977 | 551.3847 |
| YMR254C   | 13.81872 | 33.62057 | 27.66559 | 13.43147 | 16.13169 | 20.54713 | -0.5838  | 20.23699 | 40.38805 |
| YFL008W   | 928.1573 | 797.9942 | 994.9732 | 945.5752 | 995.5556 | 1311.103 | 0.257228 | 762.2601 | 978.0932 |
| YKR069W   | 1359.992 | 1645.43  | 1351.662 | 1412.99  | 1238.683 | 1227.936 | -0.16745 | 1030.962 | 988.6292 |
| YDR242W   | 325.8915 | 305.5517 | 313.214  | 326.8323 | 343.3745 | 397.2445 | 0.176308 | 415.9827 | 359.9804 |
| YPL178W   | 1761.887 | 1635.542 | 1569.034 | 1632.371 | 1570.535 | 1433.407 | -0.09924 | 1861.804 | 1532.112 |
| YGR125W   | 1378.417 | 1330.979 | 1261.749 | 1395.082 | 1244.445 | 1362.96  | 0.011341 | 1278.303 | 1363.536 |
| YCL042W   | 3.45468  | 3.955362 | 2.96417  | 4.477155 | 1.152263 | 3.913739 | -0.12046 | 4.49711  | 5.268006 |
| YCL023C   | 0        | 1.977681 | 0        | 0        | 0        | 0        | #NUM!    | 0        | 0        |
| YGL022W   | 4745.579 | 5221.077 | 4963.009 | 4987.551 | 4645.926 | 4296.307 | -0.10001 | 4719.717 | 4939.634 |
| YDR154C   | 3.45468  | 16.81029 | 10.86863 | 7.163448 | 11.52263 | 5.870608 | -0.34236 | 8.99422  | 10.53601 |
| YOL008W   | 515.8989 | 493.4314 | 436.7211 | 486.219  | 486.2552 | 439.3172 | -0.03459 | 468.8237 | 463.5846 |
| YJR020W   | 1.15156  | 0        | 0.988057 | 0        | 0        | 0        | #NUM!    | 0        | 0        |
| YOR140W   | 519.3535 | 728.7754 | 718.3173 | 676.9459 | 677.5309 | 860.0441 | 0.171404 | 567.7601 | 751.5689 |
| YCL016C   | 518.202  | 512.2193 | 571.0968 | 505.0231 | 517.3663 | 542.0528 | -0.03379 | 499.1792 | 498.7046 |
| YOL018C   | 787.667  | 716.9093 | 802.3021 | 685.9002 | 691.3581 | 669.2493 | -0.17278 | 632.9682 | 641.8188 |
| YPL126W   | 3524.925 | 3109.903 | 3744.735 | 3848.563 | 4220.741 | 5126.998 | 0.346388 | 3678.636 | 4044.073 |
| YMR309C   | 5162.443 | 5141.97  | 5913.52  | 5698.523 | 6359.342 | 7600.481 | 0.277552 | 5499.965 | 6274.196 |
| YKL035W   | 10004.75 | 9323.776 | 9668.136 | 8836.113 | 8938.108 | 8682.63  | -0.13225 | 10397.32 | 9861.708 |
| YDR255C   | 401.8944 | 388.6143 | 385.3422 | 322.3552 | 338.7655 | 430.5113 | -0.10722 | 337.2832 | 413.5385 |
| YBR202W   | 1072.102 | 1270.66  | 1239.023 | 1285.839 | 1221.399 | 1354.154 | 0.108442 | 1024.217 | 1285.394 |
| YHR083W   | 1832.132 | 1675.096 | 1528.524 | 1448.807 | 1477.202 | 1406.989 | -0.21684 | 1532.39  | 1485.578 |
| YOL068C   | 1502.786 | 1540.613 | 1615.473 | 1572.377 | 1721.482 | 1610.504 | 0.074085 | 1463.809 | 1631.326 |
| YHR133C   | 1926.56  | 1759.147 | 1814.072 | 1870.555 | 2204.28  | 1673.123 | 0.063676 | 1838.194 | 1731.418 |
| YLR369W   | 831.4263 | 870.1796 | 865.5378 | 881.9996 | 831.9342 | 827.7558 | -0.01438 | 791.4913 | 894.6831 |
| YPL072W   | 161.2184 | 137.4488 | 146.2324 | 191.6222 | 199.3416 | 193.7301 | 0.394202 | 175.3873 | 206.3303 |

|                   |          |          |          |          |          |          |          |          |          |
|-------------------|----------|----------|----------|----------|----------|----------|----------|----------|----------|
| YMR229C           | 4803.157 | 4430.994 | 4748.601 | 5601.816 | 6066.667 | 7537.861 | 0.457935 | 5513.457 | 5980.065 |
| YLR418C           | 1432.541 | 1500.071 | 1462.324 | 1416.572 | 1361.975 | 1285.663 | -0.11287 | 1304.162 | 1283.638 |
| YNL003C           | 977.6744 | 1138.155 | 1000.902 | 929.4574 | 939.0947 | 787.6399 | -0.23067 | 903.9191 | 893.8051 |
| YGL210W           | 1274.777 | 1093.658 | 1259.772 | 1269.721 | 1194.897 | 1107.588 | -0.02244 | 1180.491 | 1151.937 |
| YBR291C           | 544.6879 | 593.3043 | 472.2912 | 552.4809 | 558.8478 | 423.6622 | -0.06908 | 576.7543 | 467.9746 |
| YLR254C           | 611.4783 | 581.4382 | 502.9209 | 576.6576 | 572.6749 | 386.4817 | -0.14299 | 540.7775 | 485.5346 |
| YKL203C           | 879.7918 | 914.6774 | 846.7647 | 753.0575 | 925.2676 | 912.8796 | -0.02759 | 864.5694 | 835.857  |
| YOR103C           | 8.06092  | 17.79913 | 17.78502 | 21.49034 | 10.37037 | 13.69809 | 0.061911 | 11.24277 | 13.17002 |
| YDL009C           | 78.30608 | 81.08492 | 78.05649 | 70.73905 | 56.46091 | 65.55513 | -0.30084 | 66.33237 | 66.72808 |
| YHL030W- <i>f</i> | 3.45468  | 0        | 1.976114 | 0        | 1.152263 | 0        | -2.23669 | 0        | 4.390005 |
| YLR162W- <i>f</i> | 2.30312  | 0        | 0        | 0        | 0        | 1.956869 | -0.23504 | 2.248555 | 0        |
| YGR233C           | 899.3683 | 942.3649 | 878.3825 | 621.4291 | 758.1894 | 834.6048 | -0.29687 | 753.2659 | 827.955  |
| YCR025C           | 72.54828 | 33.62057 | 57.3073  | 48.35328 | 63.37449 | 41.09426 | -0.09723 | 60.71098 | 40.38805 |
| YLR154W- <i>f</i> | 0        | 0        | 0        | 0        | 2.304527 | 0        | #DIV/0!  | 0        | 1.756002 |
| YIL064W           | 761.1811 | 793.05   | 784.5171 | 779.025  | 868.8067 | 782.7478 | 0.055564 | 932.026  | 741.0329 |
| YLR248W           | 3207.094 | 3168.245 | 3169.686 | 3255.787 | 3353.087 | 3783.607 | 0.122719 | 3103.006 | 3325.868 |
| YDL183C           | 165.8246 | 173.0471 | 178.8383 | 171.9228 | 110.6173 | 128.1749 | -0.33401 | 147.2803 | 133.4562 |
| YEL055C           | 2384.881 | 2045.911 | 2334.778 | 2486.612 | 2764.28  | 2968.571 | 0.280833 | 2500.393 | 2633.125 |
| YOR263C           | 0        | 1.977681 | 2.96417  | 3.581724 | 0        | 1.956869 | 0.164468 | 2.248555 | 1.756002 |
| YDR447C           | 18422.66 | 14596.27 | 16521.3  | 17822.66 | 16549.96 | 15923.05 | 0.021834 | 19925.57 | 17513.49 |
| YLR197W           | 6041.083 | 6323.635 | 7215.779 | 6885.865 | 6978.108 | 7232.589 | 0.10759  | 6623.119 | 6866.846 |
| YGL034C           | 9.21248  | 2.966521 | 6.916398 | 3.581724 | 5.761317 | 4.892174 | -0.42376 | 4.49711  | 5.268006 |
| YOR115C           | 1193.016 | 1114.423 | 1151.086 | 1130.929 | 1053.169 | 1166.294 | -0.04583 | 1370.494 | 1046.577 |
| YDL088C           | 1558.061 | 1343.834 | 1467.264 | 1567.9   | 1523.292 | 1836.522 | 0.173563 | 1430.081 | 1467.14  |
| YIR022W           | 1693.945 | 1366.577 | 1361.542 | 1485.52  | 1473.745 | 1318.93  | -0.04772 | 1731.387 | 1419.728 |
| YBL064C           | 3389.041 | 2850.827 | 3192.412 | 3235.192 | 3065.021 | 2927.477 | -0.03164 | 3310.997 | 3461.958 |
| YJR040W           | 674.8141 | 834.5813 | 675.8309 | 715.4494 | 744.3622 | 657.5081 | -0.04554 | 756.6387 | 660.2568 |
| YLR219W           | 1425.631 | 1506.004 | 1408.969 | 1172.119 | 1208.724 | 1333.607 | -0.22475 | 1140.017 | 1405.68  |
| YDL145C           | 4084.583 | 3931.63  | 4629.046 | 4015.113 | 4108.972 | 5031.111 | 0.057036 | 3774.199 | 4713.988 |
| YLR311C           | 3.45468  | 6.921883 | 2.96417  | 1.790862 | 0        | 0        | -2.89711 | 14.61561 | 0        |
| YGR076C           | 649.4798 | 621.9806 | 531.5746 | 493.3825 | 521.9754 | 403.1151 | -0.34609 | 579.0029 | 589.1387 |
| YBL070C           | 0        | 1.977681 | 1.976114 | 0.895431 | 2.304527 | 0.978435 | 0.07971  | 5.621387 | 0.878001 |
| YHR175W           | 834.881  | 719.8758 | 761.7918 | 806.7834 | 784.6914 | 758.2869 | 0.020537 | 896.0492 | 816.541  |
| YDR387C           | 335.1039 | 405.4246 | 334.9513 | 316.9826 | 384.856  | 260.2636 | -0.16072 | 339.5318 | 318.7144 |
| YLR434C           | 1.15156  | 0.98884  | 1.976114 | 2.686293 | 0        | 2.935304 | 0.449557 | 6.745665 | 0        |
| YGR221C           | 396.1366 | 325.3285 | 433.7569 | 419.9572 | 458.6009 | 514.6567 | 0.270247 | 359.7688 | 434.6105 |
| YLL034C           | 1704.309 | 1977.681 | 1904.974 | 2290.513 | 2366.749 | 2665.256 | 0.390276 | 2181.098 | 2179.199 |
| YGR148C           | 34185.21 | 25172.91 | 30502.3  | 31742.13 | 31486.75 | 29848.13 | 0.050739 | 37909.51 | 31889    |
| YLL050C           | 8391.417 | 6208.929 | 7280.003 | 7509.98  | 7447.079 | 7332.39  | 0.026725 | 8828.951 | 7268.093 |
| YOR327C           | 3507.652 | 3233.508 | 3074.833 | 3356.075 | 3453.334 | 3078.156 | 0.010481 | 3395.318 | 3534.832 |
| YGR119C           | 2943.387 | 3124.736 | 3226.994 | 3412.488 | 3354.239 | 3404.953 | 0.130013 | 2805.072 | 3154.658 |
| YOR013W           | 251.0401 | 216.5561 | 195.6353 | 256.0933 | 214.321  | 232.8675 | 0.084591 | 269.8266 | 207.2083 |
| YHR165C           | 1566.122 | 1417.997 | 1381.303 | 1522.233 | 1637.366 | 1719.11  | 0.160378 | 1586.356 | 1432.898 |
| YDL107W           | 322.4368 | 313.4624 | 270.7276 | 313.4009 | 268.4774 | 298.4226 | -0.04251 | 308.052  | 312.5684 |
| YIL083C           | 1343.87  | 1176.72  | 1210.37  | 1390.604 | 1283.622 | 1326.757 | 0.100808 | 1255.818 | 1210.763 |
| YNL302C           | 29447.69 | 22579.18 | 26690.38 | 28425.46 | 27773.01 | 26378.6  | 0.069061 | 32036.29 | 27647.38 |
| YOR111W           | 340.8617 | 312.4736 | 421.9003 | 346.5318 | 374.4856 | 283.7461 | -0.0978  | 327.1647 | 397.7345 |
| YLR110C           | 253172.8 | 204846.2 | 223276.1 | 238910   | 242945.5 | 213069.8 | 0.028578 | 303787.6 | 234362.2 |
| YOL044W           | 211.887  | 245.2324 | 242.0739 | 283.8516 | 183.2099 | 164.377  | -0.14705 | 220.3584 | 187.8922 |
| YDR322W           | 1349.628 | 1211.33  | 1250.88  | 1232.113 | 1169.547 | 1223.043 | -0.07262 | 1360.376 | 1415.338 |
| YHL027W           | 1613.335 | 1658.285 | 1751.825 | 1554.468 | 1560.165 | 1665.296 | -0.07169 | 1608.841 | 1612.01  |
| YML014W           | 1038.707 | 1110.468 | 1017.699 | 1287.63  | 1200.659 | 966.6935 | 0.125619 | 1138.893 | 1110.671 |
| YPL140C           | 521.6567 | 546.8288 | 503.909  | 570.3896 | 501.2346 | 635.9826 | 0.119013 | 539.6532 | 529.4346 |
| YKL023C- <i>f</i> | 418.0163 | 481.5653 | 476.2434 | 557.8535 | 475.8848 | 499.0017 | 0.155816 | 465.4509 | 468.8526 |

|                   |          |          |          |          |          |          |          |          |          |
|-------------------|----------|----------|----------|----------|----------|----------|----------|----------|----------|
| YPR074W- <i>f</i> | 0        | 0        | 0.988057 | 0        | 0        | 0        | #NUM!    | 0        | 0        |
| YDL062W           | 0        | 0        | 0.988057 | 0        | 0        | 0        | #NUM!    | 0        | 0        |
| YCL007C           | 0        | 0        | 0.895431 | 0        | 0        | 0        | #DIV/0!  | 1.124277 | 0        |
| YHR054W- <i>f</i> | 0        | 0        | 0        | 0        | 0        | 0.978435 | #DIV/0!  | 1.124277 | 0        |
| YNL132W           | 2838.595 | 2592.74  | 2725.061 | 3194.898 | 3301.235 | 3319.829 | 0.267198 | 2938.861 | 3121.294 |
| YBL024W           | 2808.655 | 2836.983 | 3076.809 | 3284.441 | 3265.515 | 3912.76  | 0.262453 | 3176.084 | 3353.964 |
| YIL035C           | 1568.425 | 1525.781 | 1614.485 | 1661.92  | 1608.56  | 1803.255 | 0.107722 | 1685.292 | 1581.28  |
| YLR315W           | 46.0624  | 86.02912 | 96.82957 | 85.96138 | 59.9177  | 56.74921 | -0.17601 | 58.46243 | 64.97208 |
| YOR098C           | 2487.369 | 2723.267 | 2789.284 | 3192.212 | 3369.218 | 4055.612 | 0.408324 | 2462.168 | 3244.214 |
| YBL087C           | 17713.29 | 14083.07 | 15793.1  | 16546.67 | 17434.9  | 16299.74 | 0.07938  | 20189.77 | 16571.39 |
| YDL188C           | 1136.59  | 1280.548 | 1169.859 | 1191.819 | 1086.584 | 1138.898 | -0.06992 | 1190.61  | 1103.647 |
| YPR170W- <i>f</i> | 43.75928 | 35.59826 | 28.65365 | 42.08526 | 36.87243 | 34.24522 | 0.06773  | 44.9711  | 35.12004 |
| YGL229C           | 102.4888 | 76.14071 | 102.7579 | 63.5756  | 67.98354 | 67.512   | -0.49927 | 55.0896  | 91.31211 |
| YKL173W           | 915.4902 | 816.7822 | 822.0633 | 977.8107 | 937.9425 | 1107.588 | 0.243196 | 918.5347 | 942.9732 |
| YPL086C           | 1346.174 | 1678.062 | 1223.214 | 1629.684 | 1576.296 | 1618.331 | 0.183726 | 1504.283 | 1488.212 |
| YPR001W           | 103.6404 | 87.01796 | 78.05649 | 86.85681 | 132.5103 | 80.23165 | 0.156956 | 92.19075 | 98.33612 |
| YNL234W           | 216.4933 | 197.7681 | 224.2889 | 222.0669 | 216.6255 | 221.1262 | 0.047269 | 211.3642 | 243.2063 |
| YMR212C           | 1753.826 | 1647.408 | 1918.806 | 1951.144 | 2049.877 | 2540.995 | 0.298298 | 2145.121 | 1906.14  |
| YKR031C           | 751.9686 | 723.8312 | 820.0872 | 616.0565 | 667.1605 | 963.7582 | -0.03107 | 664.448  | 715.5709 |
| YOR276W           | 746.2108 | 681.3111 | 843.8005 | 883.7904 | 808.889  | 750.4594 | 0.105203 | 903.9191 | 767.3729 |
| YFL041W- <i>f</i> | 34.5468  | 31.64289 | 24.70142 | 33.13095 | 25.3498  | 17.61182 | -0.25638 | 21.36127 | 43.02205 |
| YBR191W- <i>f</i> | 3.45468  | 2.966521 | 0.988057 | 2.686293 | 9.218108 | 2.935304 | 1.002061 | 6.745665 | 4.390005 |
| YPL205C           | 42.60772 | 86.02912 | 99.79374 | 92.2294  | 62.22223 | 90.99443 | 0.10365  | 57.33815 | 71.99609 |
| YLR144C           | 633.358  | 650.657  | 610.6191 | 711.8677 | 670.6173 | 736.7613 | 0.161632 | 643.0867 | 585.6267 |
| YDR228C           | 671.3594 | 711.9651 | 772.6604 | 885.5813 | 842.3046 | 933.4267 | 0.303791 | 609.3584 | 808.639  |
| YGR034W           | 24077.97 | 19299.2  | 22154.21 | 23003.62 | 22964.61 | 21811.27 | 0.048663 | 27703.32 | 23245.96 |
| YJL194W           | 307.4665 | 254.132  | 213.4203 | 261.4659 | 275.391  | 229.9322 | -0.0154  | 252.9624 | 230.0363 |
| YBL025W           | 362.7414 | 331.2615 | 242.0739 | 317.878  | 397.5309 | 296.4657 | 0.112332 | 300.1821 | 400.3685 |
| YDR360W           | 6.90936  | 23.73217 | 12.84474 | 32.23552 | 16.13169 | 23.48243 | 0.724421 | 15.73988 | 15.80402 |
| YDL095W           | 4912.555 | 4676.226 | 4675.485 | 4684     | 5054.98  | 4714.098 | 0.018971 | 4683.74  | 4936.122 |
| YBR200W           | 1144.651 | 1108.49  | 1130.337 | 1130.929 | 1226.008 | 1267.073 | 0.09908  | 1018.595 | 1189.691 |
| YAL048C           | 214.1901 | 228.4221 | 264.7992 | 241.7664 | 213.1687 | 279.8323 | 0.054738 | 156.2746 | 234.4263 |
| YLR181C           | 996.0993 | 949.2868 | 955.451  | 985.8696 | 889.5474 | 852.2166 | -0.08882 | 920.7833 | 1015.847 |
| YBR008C           | 427.2287 | 536.9404 | 454.5061 | 451.2972 | 353.7449 | 396.2661 | -0.23994 | 405.8642 | 460.0726 |
| YJR149W           | 280.9806 | 379.7147 | 369.5333 | 255.1978 | 339.9177 | 289.6167 | -0.21965 | 313.6734 | 308.1784 |
| YNL146W           | 84.06388 | 67.24115 | 65.21175 | 86.85681 | 72.5926  | 72.40417 | 0.098735 | 62.95954 | 69.36208 |
| YHR130C           | 28.789   | 22.74333 | 25.68948 | 26.86293 | 13.82716 | 18.59026 | -0.38145 | 21.36127 | 28.09603 |
| YIL048W           | 1004.16  | 1028.394 | 1278.546 | 1061.086 | 1166.091 | 1594.849 | 0.207027 | 1111.91  | 1211.641 |
| YBR078W           | 22692.64 | 24981.08 | 23749.92 | 25892.28 | 27215.31 | 23922.73 | 0.109025 | 25208.55 | 24548.03 |
| YIL025C           | 0        | 0        | 0        | 1.790862 | 2.304527 | 1.956869 | #DIV/0!  | 2.248555 | 0        |
| YDR243C           | 385.7726 | 394.5473 | 411.0316 | 364.4404 | 427.4897 | 495.088  | 0.111433 | 368.763  | 414.4165 |
| YPR201W           | 70.24516 | 65.26347 | 115.6026 | 68.05276 | 62.22223 | 54.79234 | -0.44028 | 69.7052  | 75.50809 |
| YPR056W           | 776.1514 | 630.8802 | 769.6963 | 734.2534 | 691.3581 | 804.2733 | 0.034808 | 719.5376 | 660.2568 |
| YBR076W           | 35.69836 | 8.899564 | 14.82085 | 14.3269  | 12.6749  | 27.39617 | -0.12737 | 25.85838 | 23.70603 |
| YPR176C           | 825.6685 | 841.5032 | 710.4129 | 768.2798 | 732.8396 | 644.7885 | -0.14791 | 707.1705 | 791.957  |
| YKL068W           | 2497.734 | 2564.063 | 2962.194 | 2968.354 | 3022.387 | 3683.807 | 0.269874 | 2556.607 | 2999.252 |
| YDR008C           | 5.7578   | 0.98884  | 2.96417  | 2.686293 | 2.304527 | 3.913739 | -0.12505 | 5.621387 | 1.756002 |
| YGR128C           | 2220.208 | 2103.264 | 2194.474 | 2764.196 | 2708.971 | 3261.123 | 0.422273 | 2639.804 | 2536.545 |
| YHR199C- <i>f</i> | 104.792  | 151.2926 | 146.2324 | 96.70655 | 103.7037 | 99.80034 | -0.42236 | 91.06648 | 105.3601 |
| YNL308C           | 4427.748 | 4278.713 | 4574.703 | 5355.573 | 5116.05  | 5748.304 | 0.288386 | 4802.913 | 5110.844 |
| YMR142C           | 44637.92 | 33928.1  | 39555.87 | 42746.98 | 40666.83 | 38191.24 | 0.041927 | 48224.76 | 40925.39 |
| YMR310C           | 1537.333 | 1710.694 | 1618.437 | 1833.843 | 2080.988 | 1877.616 | 0.251299 | 1886.538 | 1755.124 |
| YLL025W           | 57.578   | 96.90636 | 49.40284 | 57.30759 | 58.76544 | 52.83547 | -0.27153 | 49.46821 | 49.16806 |
| YPR165W           | 7930.793 | 7019.778 | 7104.129 | 7362.234 | 7217.778 | 6882.31  | -0.03928 | 8605.22  | 7636.853 |



|                   |          |          |          |          |          |          |          |          |          |
|-------------------|----------|----------|----------|----------|----------|----------|----------|----------|----------|
| YMR106C           | 336.2555 | 274.8976 | 320.1304 | 286.5379 | 282.3045 | 296.4657 | -0.10601 | 233.8497 | 278.3263 |
| YJR047C           | 6339.337 | 5622.547 | 5460.002 | 5952.825 | 5924.939 | 5008.607 | -0.04504 | 5647.246 | 4645.504 |
| YBR086C           | 6524.739 | 4957.057 | 7029.036 | 6264.435 | 6640.494 | 7950.76  | 0.172071 | 6869.335 | 7318.139 |
| YCR011C           | 1447.511 | 1373.499 | 1421.814 | 1123.766 | 1193.745 | 1411.881 | -0.18608 | 1287.298 | 1259.932 |
| YJR049C           | 1303.566 | 1290.437 | 1217.286 | 1230.322 | 1143.045 | 1169.229 | -0.10547 | 1117.532 | 1205.495 |
| YOR373W           | 754.2718 | 709.9874 | 812.1827 | 712.7631 | 740.9054 | 902.1168 | 0.049427 | 622.8497 | 721.7169 |
| YCR016W           | 2061.292 | 1873.853 | 1892.129 | 2249.323 | 2085.597 | 2023.403 | 0.125825 | 2123.76  | 2095.789 |
| YCR083W           | 373.1054 | 355.9826 | 284.5604 | 360.8587 | 311.1111 | 299.401  | -0.06146 | 395.7457 | 386.3205 |
| YHR086W           | 1104.346 | 1168.809 | 1064.137 | 1081.681 | 1022.058 | 1199.561 | -0.01477 | 1028.714 | 1017.603 |
| YNL026W           | 656.3892 | 698.1213 | 755.8635 | 622.3246 | 695.9671 | 608.5864 | -0.13123 | 589.1214 | 676.9388 |
| YHR013C           | 2075.111 | 1967.792 | 1860.511 | 2105.158 | 1995.72  | 1845.328 | 0.01042  | 2285.656 | 1985.16  |
| YDR192C           | 489.413  | 439.0452 | 417.948  | 445.9247 | 496.6256 | 424.6407 | 0.022101 | 413.7341 | 395.1005 |
| YMR055C           | 368.4992 | 315.4401 | 315.1901 | 300.8648 | 276.5432 | 237.7596 | -0.29357 | 323.7919 | 269.5463 |
| YGL087C           | 743.9077 | 708.0098 | 706.4606 | 749.4758 | 707.4898 | 710.3436 | 0.005957 | 801.6098 | 774.3969 |
| YAL019W- <i>f</i> | 0        | 0        | 0        | 0        | 0        | 1.956869 | #DIV/0!  | 0        | 0.878001 |
| YPL204W           | 2831.686 | 3279.984 | 3264.54  | 3082.969 | 3150.288 | 2902.037 | -0.03755 | 2699.39  | 3132.708 |
| YDR419W           | 602.2658 | 606.1592 | 564.1804 | 536.3632 | 495.4733 | 470.6271 | -0.23854 | 552.0202 | 532.0687 |
| YJR070C           | 6705.534 | 6873.43  | 6758.309 | 8683.89  | 7707.49  | 6826.539 | 0.191113 | 7205.494 | 7290.043 |
| YJR120W           | 214.1901 | 315.4401 | 310.2498 | 348.3227 | 321.4815 | 372.7836 | 0.311914 | 259.7081 | 374.9065 |
| YJL168C           | 1003.009 | 1014.55  | 999.9135 | 1041.386 | 1096.955 | 1241.634 | 0.163672 | 756.6387 | 1081.697 |
| YBL042C           | 3172.548 | 4220.371 | 3631.109 | 3398.161 | 3548.971 | 3603.575 | -0.06331 | 3376.205 | 3518.15  |
| YER106W           | 3.45468  | 13.84377 | 11.85668 | 16.11776 | 4.609054 | 0        | -0.49225 | 3.372832 | 8.780011 |
| YML094W           | 479.0489 | 379.7147 | 375.4616 | 438.7612 | 447.0782 | 410.9426 | 0.07133  | 466.5752 | 433.7325 |
| YLR437C- <i>f</i> | 0        | 0.98884  | 0        | 0        | 0        | 0.978435 | -0.01526 | 0        | 0        |
| YOL021C           | 2335.364 | 2451.335 | 2462.238 | 2720.319 | 2545.35  | 3090.875 | 0.205137 | 2425.067 | 2684.049 |
| YNL001W           | 939.6729 | 1076.847 | 954.4629 | 1074.517 | 986.3375 | 1036.162 | 0.059939 | 1009.601 | 1098.379 |
| YDL029W           | 3103.454 | 3215.709 | 3125.224 | 3119.682 | 3082.305 | 2967.592 | -0.0426  | 2964.72  | 3036.128 |
| YGL157W           | 1559.212 | 1491.171 | 1621.401 | 1763.999 | 1691.523 | 1548.862 | 0.099219 | 1605.468 | 1679.616 |
| YJR122W           | 466.3818 | 459.8108 | 475.2553 | 440.5521 | 375.6379 | 370.8268 | -0.23958 | 382.2543 | 482.0226 |
| YGR185C           | 8242.866 | 7443.991 | 8265.095 | 8487.791 | 8306.667 | 7551.559 | 0.023543 | 8516.402 | 8169.8   |
| YOL097W- <i>f</i> | 69.0936  | 69.21883 | 50.3909  | 59.99388 | 48.39507 | 62.61982 | -0.14205 | 74.20231 | 67.60608 |
| YHR077C           | 2181.055 | 2079.531 | 2195.462 | 2252.009 | 2411.687 | 2882.469 | 0.225092 | 2187.844 | 2355.677 |
| YDR218C           | 29.94056 | 63.28579 | 18.77308 | 57.30759 | 25.3498  | 37.18052 | 0.097593 | 58.46243 | 36.87605 |
| YGL258W           | 46.0624  | 43.50898 | 39.52227 | 33.13095 | 54.15638 | 33.26678 | -0.09874 | 39.34971 | 35.12004 |
| YML082W           | 878.6402 | 1194.519 | 1134.289 | 1137.197 | 1198.354 | 1146.725 | 0.118605 | 1092.798 | 1174.765 |
| YNL149C           | 19.57652 | 9.888404 | 12.84474 | 21.49034 | 13.82716 | 21.52556 | 0.425997 | 16.86416 | 16.68202 |
| YMR068W           | 333.9524 | 478.5988 | 427.8286 | 478.1602 | 354.8971 | 312.1207 | -0.11521 | 444.0896 | 319.5924 |
| YMR313C           | 629.9033 | 773.2732 | 708.4367 | 739.626  | 655.6379 | 628.1551 | -0.06155 | 663.3237 | 671.6708 |
| YHR093W           | 11.5156  | 9.888404 | 12.84474 | 12.53603 | 4.609054 | 3.913739 | -0.70163 | 12.36705 | 6.146008 |
| YDR009W           | 148.5512 | 156.2368 | 124.4952 | 124.4649 | 149.7943 | 80.23165 | -0.27618 | 132.6647 | 125.5542 |
| YHR154W           | 749.6655 | 679.3334 | 818.1111 | 737.8352 | 848.0659 | 1004.852 | 0.205301 | 672.3179 | 738.3989 |
| YKL048C           | 549.2941 | 509.2528 | 496.9926 | 583.821  | 589.9589 | 610.5433 | 0.197962 | 418.2312 | 554.0187 |
| YIL071C           | 122.0654 | 165.1364 | 149.1966 | 164.7593 | 95.63787 | 140.8946 | -0.12099 | 97.81214 | 160.6742 |
| YDR373W           | 905.1261 | 868.2019 | 889.2511 | 953.634  | 921.8108 | 786.6615 | -0.00026 | 962.3815 | 880.6351 |
| YDR125C           | 90.97324 | 139.4265 | 138.328  | 75.21621 | 84.11523 | 131.1103 | -0.34431 | 125.9191 | 100.0921 |
| YML077W           | 581.5378 | 568.5832 | 585.9177 | 680.5276 | 733.9918 | 544.0097 | 0.173971 | 625.0983 | 586.5047 |
| YGL108C           | 221.0995 | 226.4445 | 225.277  | 216.6943 | 246.5844 | 217.2125 | 0.016354 | 232.7254 | 195.7942 |
| YER172C           | 988.0384 | 1003.673 | 1058.209 | 1041.386 | 1011.687 | 1489.178 | 0.215895 | 1053.448 | 1052.723 |
| YDL102W           | 633.358  | 564.6279 | 741.0426 | 711.8677 | 667.1605 | 883.5265 | 0.222619 | 635.2168 | 693.6208 |
| YKL159C           | 503.2317 | 439.0452 | 396.2108 | 447.7155 | 445.926  | 366.913  | -0.08655 | 455.3324 | 461.8286 |
| YDL073W           | 961.5525 | 851.3916 | 1102.671 | 936.6209 | 1004.774 | 1320.887 | 0.162081 | 988.2399 | 1012.335 |
| YJR138W           | 522.8082 | 500.3533 | 531.5746 | 442.3429 | 468.9712 | 706.4299 | 0.057314 | 471.0723 | 529.4346 |
| YGR172C           | 837.1841 | 1010.595 | 910.0003 | 929.4574 | 851.5227 | 725.0201 | -0.13812 | 991.6127 | 883.2691 |
| YBR220C           | 720.8765 | 754.4853 | 705.4726 | 744.1032 | 759.3416 | 741.6535 | 0.041898 | 667.8208 | 759.4709 |

|                   |          |          |          |          |          |          |          |          |          |
|-------------------|----------|----------|----------|----------|----------|----------|----------|----------|----------|
| YLL022C           | 1011.07  | 1103.546 | 1025.603 | 1061.981 | 955.2264 | 938.3189 | -0.08745 | 1104.04  | 959.6552 |
| YJL014W           | 3919.91  | 3995.904 | 4000.642 | 4051.825 | 4137.778 | 4339.358 | 0.072312 | 4013.671 | 4042.317 |
| YLL023C           | 3032.057 | 3266.14  | 3252.683 | 2842.994 | 3005.103 | 2466.634 | -0.19996 | 3318.867 | 2954.474 |
| YJL054W           | 1643.276 | 1809.578 | 1655.983 | 1630.58  | 1570.535 | 1539.078 | -0.10805 | 1717.896 | 1655.91  |
| YAL012W           | 21118.46 | 22390.31 | 20020.01 | 23408.36 | 21952.92 | 20324.05 | 0.048161 | 21971.75 | 19966.62 |
| YMR133W           | 50.66864 | 45.48666 | 51.37895 | 30.44465 | 34.5679  | 31.30991 | -0.61511 | 48.34393 | 51.80206 |
| YGL102C           | 1.15156  | 0.98884  | 0.988057 | 0        | 0        | 0        | #NUM!    | 2.248555 | 0        |
| YBR073W           | 1773.402 | 1661.252 | 1775.538 | 1713.855 | 1916.214 | 2465.655 | 0.226461 | 1748.251 | 1723.516 |
| YHL045W           | 0        | 0        | 0        | 0        | 2.304527 | 0        | #DIV/0!  | 0        | 0        |
| YKR040C           | 0        | 0        | 0        | 0        | 0        | 1.956869 | #DIV/0!  | 0        | 0        |
| YBL091C- <i>f</i> | 788.8186 | 746.5745 | 709.4248 | 727.9854 | 684.4445 | 665.3356 | -0.11157 | 737.526  | 767.3729 |
| YHR155W           | 705.9062 | 607.148  | 733.1382 | 650.0829 | 769.712  | 870.8069 | 0.162785 | 613.8555 | 769.1289 |
| YDR194W- <i>f</i> | 0        | 0        | 0        | 0        | 0        | 0.978435 | #DIV/0!  | 0        | 0        |
| YFL012W- <i>f</i> | 0        | 0        | 0        | 0        | 0        | 0.978435 | #DIV/0!  | 0        | 0        |
| YOR331C           | 0        | 0        | 0        | 0.895431 | 0        | 0        | #DIV/0!  | 0        | 0        |
| YPR142C           | 0        | 0        | 0        | 0        | 0        | 0.978435 | #DIV/0!  | 0        | 0        |
| YAL034C- <i>f</i> | 0        | 0        | 0        | 0.895431 | 0        | 0        | #DIV/0!  | 0        | 0        |
| YPL059W           | 2019.836 | 1545.558 | 1716.255 | 1747.881 | 1681.152 | 1426.558 | -0.12134 | 1871.922 | 1657.666 |
| YGR247W           | 423.7741 | 520.1301 | 402.1391 | 436.0749 | 417.1194 | 309.1854 | -0.21164 | 530.659  | 352.0784 |
| YPR058W           | 444.5021 | 502.3309 | 508.8493 | 477.2647 | 436.7079 | 444.2094 | -0.10002 | 538.5289 | 429.3425 |
| YMR007W           | 82.91232 | 65.26347 | 64.22369 | 35.81724 | 67.98354 | 87.08069 | -0.1541  | 78.69942 | 67.60608 |
| YDR220C           | 16.12184 | 13.84377 | 11.85668 | 8.95431  | 13.82716 | 25.4393  | 0.205383 | 11.24277 | 15.80402 |
| YMR026C           | 559.6581 | 515.1859 | 535.5268 | 509.5003 | 505.8437 | 525.4194 | -0.06375 | 580.1272 | 490.8026 |
| YKL174C           | 530.8691 | 807.8826 | 574.061  | 588.2982 | 623.3745 | 629.1335 | -0.05536 | 649.8324 | 640.0628 |
| YPR023C           | 1751.523 | 1785.846 | 1605.592 | 1746.986 | 1670.782 | 1628.115 | -0.02749 | 1860.679 | 1566.354 |
| Q0010             | 0        | 0        | 0        | 0        | 0        | 0        | #DIV/0!  | 0        | 0        |
| Q0017             | 0        | 0        | 0        | 0        | 0        | 0        | #DIV/0!  | 0        | 0        |
| Q0032             | 0        | 0        | 0        | 0        | 0        | 0        | #DIV/0!  | 0        | 0        |
| Q0050             | 0        | 0        | 0        | 0        | 0        | 0        | #DIV/0!  | 0        | 0        |
| Q0055             | 0        | 0        | 0        | 0        | 0        | 0        | #DIV/0!  | 0        | 0        |
| Q0060             | 0        | 0        | 0        | 0        | 0        | 0        | #DIV/0!  | 0        | 0        |
| Q0065             | 0        | 0        | 0        | 0        | 0        | 0        | #DIV/0!  | 0        | 0        |
| Q0070             | 0        | 0        | 0        | 0        | 0        | 0        | #DIV/0!  | 0        | 0        |
| Q0075             | 0        | 0        | 0        | 0        | 0        | 0        | #DIV/0!  | 0        | 0        |
| Q0080             | 0        | 0        | 0        | 0        | 0        | 0        | #DIV/0!  | 0        | 0        |
| Q0092             | 0        | 0        | 0        | 0        | 0        | 0        | #DIV/0!  | 0        | 0        |
| Q0110             | 0        | 0        | 0        | 0        | 0        | 0        | #DIV/0!  | 0        | 0        |
| Q0115             | 0        | 0        | 0        | 0        | 0        | 0        | #DIV/0!  | 0        | 0        |
| Q0120             | 0        | 0        | 0        | 0        | 0        | 0        | #DIV/0!  | 0        | 0        |
| Q0140             | 0        | 0        | 0        | 0        | 0        | 0        | #DIV/0!  | 0        | 0        |
| Q0142             | 0        | 0        | 0        | 0        | 0        | 0        | #DIV/0!  | 0        | 0        |
| Q0144             | 0        | 0        | 0        | 0        | 0        | 0        | #DIV/0!  | 0        | 0        |
| Q0160             | 0        | 0        | 0        | 0        | 0        | 0        | #DIV/0!  | 0        | 0        |
| Q0182             | 0        | 0        | 0        | 0        | 0        | 0        | #DIV/0!  | 0        | 0        |
| Q0297             | 0        | 0        | 0        | 0        | 0        | 0        | #DIV/0!  | 0        | 0        |
| YAL004W           | 0        | 0        | 0        | 0        | 0        | 0        | #DIV/0!  | 0        | 0        |
| YAL042C- <i>f</i> | 0        | 0        | 0        | 0        | 0        | 0        | #DIV/0!  | 0        | 0        |
| YAL045C           | 0        | 0        | 0        | 0        | 0        | 0        | #DIV/0!  | 0        | 0        |
| YAL059C- <i>f</i> | 0        | 0        | 0        | 0        | 0        | 0        | #DIV/0!  | 0        | 0        |
| YAL063C- <i>f</i> | 0        | 0        | 0        | 0        | 0        | 0        | #DIV/0!  | 0        | 0        |
| YAL064W           | 0        | 0        | 0        | 0        | 0        | 0        | #DIV/0!  | 0        | 0        |
| YAL068W- <i>f</i> | 0        | 0        | 0        | 0        | 0        | 0        | #DIV/0!  | 0        | 0        |
| YAR035C- <i>f</i> | 0        | 0        | 0        | 0        | 0        | 0        | #DIV/0!  | 0        | 0        |
| YAR047C           | 0        | 0        | 0        | 0        | 0        | 0        | #DIV/0!  | 0        | 0        |

|                   |   |   |   |   |   |           |   |   |
|-------------------|---|---|---|---|---|-----------|---|---|
| YAR053W           | 0 | 0 | 0 | 0 | 0 | 0 #DIV/0! | 0 | 0 |
| YAR060C           | 0 | 0 | 0 | 0 | 0 | 0 #DIV/0! | 0 | 0 |
| YAR069C           | 0 | 0 | 0 | 0 | 0 | 0 #DIV/0! | 0 | 0 |
| YAR070C           | 0 | 0 | 0 | 0 | 0 | 0 #DIV/0! | 0 | 0 |
| YBL006W- <i>f</i> | 0 | 0 | 0 | 0 | 0 | 0 #DIV/0! | 0 | 0 |
| YBL039C- <i>f</i> | 0 | 0 | 0 | 0 | 0 | 0 #DIV/0! | 0 | 0 |
| YBL062W           | 0 | 0 | 0 | 0 | 0 | 0 #DIV/0! | 0 | 0 |
| YBL068W- <i>f</i> | 0 | 0 | 0 | 0 | 0 | 0 #DIV/0! | 0 | 0 |
| YBL113W- <i>f</i> | 0 | 0 | 0 | 0 | 0 | 0 #DIV/0! | 0 | 0 |
| YBR056C- <i>f</i> | 0 | 0 | 0 | 0 | 0 | 0 #DIV/0! | 0 | 0 |
| YBR099C           | 0 | 0 | 0 | 0 | 0 | 0 #DIV/0! | 0 | 0 |
| YBR121C- <i>f</i> | 0 | 0 | 0 | 0 | 0 | 0 #DIV/0! | 0 | 0 |
| YBR131C- <i>f</i> | 0 | 0 | 0 | 0 | 0 | 0 #DIV/0! | 0 | 0 |
| YBR141W- <i>f</i> | 0 | 0 | 0 | 0 | 0 | 0 #DIV/0! | 0 | 0 |
| YBR223W- <i>f</i> | 0 | 0 | 0 | 0 | 0 | 0 #DIV/0! | 0 | 0 |
| YBR266C           | 0 | 0 | 0 | 0 | 0 | 0 #DIV/0! | 0 | 0 |
| YCL022C           | 0 | 0 | 0 | 0 | 0 | 0 #DIV/0! | 0 | 0 |
| YCL058W- <i>f</i> | 0 | 0 | 0 | 0 | 0 | 0 #DIV/0! | 0 | 0 |
| YCR038W- <i>f</i> | 0 | 0 | 0 | 0 | 0 | 0 #DIV/0! | 0 | 0 |
| YCR045W- <i>f</i> | 0 | 0 | 0 | 0 | 0 | 0 #DIV/0! | 0 | 0 |
| YCR047W- <i>f</i> | 0 | 0 | 0 | 0 | 0 | 0 #DIV/0! | 0 | 0 |
| YCR081C- <i>f</i> | 0 | 0 | 0 | 0 | 0 | 0 #DIV/0! | 0 | 0 |
| YCR087C- <i>f</i> | 0 | 0 | 0 | 0 | 0 | 0 #DIV/0! | 0 | 0 |
| YDL025W- <i>f</i> | 0 | 0 | 0 | 0 | 0 | 0 #DIV/0! | 0 | 0 |
| YDL041W           | 0 | 0 | 0 | 0 | 0 | 0 #DIV/0! | 0 | 0 |
| YDL086C- <i>f</i> | 0 | 0 | 0 | 0 | 0 | 0 #DIV/0! | 0 | 0 |
| YDL096C           | 0 | 0 | 0 | 0 | 0 | 0 #DIV/0! | 0 | 0 |
| YDL114W- <i>f</i> | 0 | 0 | 0 | 0 | 0 | 0 #DIV/0! | 0 | 0 |
| YDL152W           | 0 | 0 | 0 | 0 | 0 | 0 #DIV/0! | 0 | 0 |
| YDL159C- <i>f</i> | 0 | 0 | 0 | 0 | 0 | 0 #DIV/0! | 0 | 0 |
| YDL163W           | 0 | 0 | 0 | 0 | 0 | 0 #DIV/0! | 0 | 0 |
| YDL172C           | 0 | 0 | 0 | 0 | 0 | 0 #DIV/0! | 0 | 0 |
| YDL228C           | 0 | 0 | 0 | 0 | 0 | 0 #DIV/0! | 0 | 0 |
| YDR015C           | 0 | 0 | 0 | 0 | 0 | 0 #DIV/0! | 0 | 0 |
| YDR094W           | 0 | 0 | 0 | 0 | 0 | 0 #DIV/0! | 0 | 0 |
| YDR149C           | 0 | 0 | 0 | 0 | 0 | 0 #DIV/0! | 0 | 0 |
| YDR193W           | 0 | 0 | 0 | 0 | 0 | 0 #DIV/0! | 0 | 0 |
| YDR210W           | 0 | 0 | 0 | 0 | 0 | 0 #DIV/0! | 0 | 0 |
| YDR354C- <i>f</i> | 0 | 0 | 0 | 0 | 0 | 0 #DIV/0! | 0 | 0 |
| YDR355C           | 0 | 0 | 0 | 0 | 0 | 0 #DIV/0! | 0 | 0 |
| YDR371C- <i>f</i> | 0 | 0 | 0 | 0 | 0 | 0 #DIV/0! | 0 | 0 |
| YDR426C           | 0 | 0 | 0 | 0 | 0 | 0 #DIV/0! | 0 | 0 |
| YDR464C- <i>f</i> | 0 | 0 | 0 | 0 | 0 | 0 #DIV/0! | 0 | 0 |
| YDR524C- <i>f</i> | 0 | 0 | 0 | 0 | 0 | 0 #DIV/0! | 0 | 0 |
| YDR545C- <i>f</i> | 0 | 0 | 0 | 0 | 0 | 0 #DIV/0! | 0 | 0 |
| YEL008C- <i>f</i> | 0 | 0 | 0 | 0 | 0 | 0 #DIV/0! | 0 | 0 |
| YEL018C- <i>f</i> | 0 | 0 | 0 | 0 | 0 | 0 #DIV/0! | 0 | 0 |
| YEL032C- <i>f</i> | 0 | 0 | 0 | 0 | 0 | 0 #DIV/0! | 0 | 0 |
| YEL034W           | 0 | 0 | 0 | 0 | 0 | 0 #DIV/0! | 0 | 0 |
| YEL074W           | 0 | 0 | 0 | 0 | 0 | 0 #DIV/0! | 0 | 0 |
| YEL075W- <i>f</i> | 0 | 0 | 0 | 0 | 0 | 0 #DIV/0! | 0 | 0 |
| YEL076C           | 0 | 0 | 0 | 0 | 0 | 0 #DIV/0! | 0 | 0 |
| YEL077W- <i>f</i> | 0 | 0 | 0 | 0 | 0 | 0 #DIV/0! | 0 | 0 |
| YER023C- <i>f</i> | 0 | 0 | 0 | 0 | 0 | 0 #DIV/0! | 0 | 0 |

|                   |   |   |   |   |   |           |   |   |
|-------------------|---|---|---|---|---|-----------|---|---|
| YER038W- <i>f</i> | 0 | 0 | 0 | 0 | 0 | 0 #DIV/0! | 0 | 0 |
| YER067C- <i>f</i> | 0 | 0 | 0 | 0 | 0 | 0 #DIV/0! | 0 | 0 |
| YER067W           | 0 | 0 | 0 | 0 | 0 | 0 #DIV/0! | 0 | 0 |
| YER079C- <i>f</i> | 0 | 0 | 0 | 0 | 0 | 0 #DIV/0! | 0 | 0 |
| YER085C           | 0 | 0 | 0 | 0 | 0 | 0 #DIV/0! | 0 | 0 |
| YER088W- <i>f</i> | 0 | 0 | 0 | 0 | 0 | 0 #DIV/0! | 0 | 0 |
| YER090C- <i>f</i> | 0 | 0 | 0 | 0 | 0 | 0 #DIV/0! | 0 | 0 |
| YER138W- <i>f</i> | 0 | 0 | 0 | 0 | 0 | 0 #DIV/0! | 0 | 0 |
| YER152W- <i>f</i> | 0 | 0 | 0 | 0 | 0 | 0 #DIV/0! | 0 | 0 |
| YER172C- <i>f</i> | 0 | 0 | 0 | 0 | 0 | 0 #DIV/0! | 0 | 0 |
| YER190C- <i>f</i> | 0 | 0 | 0 | 0 | 0 | 0 #DIV/0! | 0 | 0 |
| YER190C- <i>f</i> | 0 | 0 | 0 | 0 | 0 | 0 #DIV/0! | 0 | 0 |
| YFL013W- <i>f</i> | 0 | 0 | 0 | 0 | 0 | 0 #DIV/0! | 0 | 0 |
| YFL031C- <i>f</i> | 0 | 0 | 0 | 0 | 0 | 0 #DIV/0! | 0 | 0 |
| YFL063W           | 0 | 0 | 0 | 0 | 0 | 0 #DIV/0! | 0 | 0 |
| YFL065C           | 0 | 0 | 0 | 0 | 0 | 0 #DIV/0! | 0 | 0 |
| YFR009W- <i>f</i> | 0 | 0 | 0 | 0 | 0 | 0 #DIV/0! | 0 | 0 |
| YGL014C- <i>f</i> | 0 | 0 | 0 | 0 | 0 | 0 #DIV/0! | 0 | 0 |
| YGL041C           | 0 | 0 | 0 | 0 | 0 | 0 #DIV/0! | 0 | 0 |
| YGL063C- <i>f</i> | 0 | 0 | 0 | 0 | 0 | 0 #DIV/0! | 0 | 0 |
| YGL123C- <i>f</i> | 0 | 0 | 0 | 0 | 0 | 0 #DIV/0! | 0 | 0 |
| YGL132W           | 0 | 0 | 0 | 0 | 0 | 0 #DIV/0! | 0 | 0 |
| YGL152C           | 0 | 0 | 0 | 0 | 0 | 0 #DIV/0! | 0 | 0 |
| YGL177W           | 0 | 0 | 0 | 0 | 0 | 0 #DIV/0! | 0 | 0 |
| YGL188C- <i>f</i> | 0 | 0 | 0 | 0 | 0 | 0 #DIV/0! | 0 | 0 |
| YGL218W           | 0 | 0 | 0 | 0 | 0 | 0 #DIV/0! | 0 | 0 |
| YGR031C- <i>f</i> | 0 | 0 | 0 | 0 | 0 | 0 #DIV/0! | 0 | 0 |
| YGR068W- <i>f</i> | 0 | 0 | 0 | 0 | 0 | 0 #DIV/0! | 0 | 0 |
| YGR073C           | 0 | 0 | 0 | 0 | 0 | 0 #DIV/0! | 0 | 0 |
| YGR115C           | 0 | 0 | 0 | 0 | 0 | 0 #DIV/0! | 0 | 0 |
| YGR151C           | 0 | 0 | 0 | 0 | 0 | 0 #DIV/0! | 0 | 0 |
| YGR226C           | 0 | 0 | 0 | 0 | 0 | 0 #DIV/0! | 0 | 0 |
| YGR270C- <i>f</i> | 0 | 0 | 0 | 0 | 0 | 0 #DIV/0! | 0 | 0 |
| YGR296C- <i>f</i> | 0 | 0 | 0 | 0 | 0 | 0 #DIV/0! | 0 | 0 |
| YGR296C- <i>f</i> | 0 | 0 | 0 | 0 | 0 | 0 #DIV/0! | 0 | 0 |
| YHL050W- <i>f</i> | 0 | 0 | 0 | 0 | 0 | 0 #DIV/0! | 0 | 0 |
| YHR052W- <i>f</i> | 0 | 0 | 0 | 0 | 0 | 0 #DIV/0! | 0 | 0 |
| YHR055C           | 0 | 0 | 0 | 0 | 0 | 0 #DIV/0! | 0 | 0 |
| YHR056W- <i>f</i> | 0 | 0 | 0 | 0 | 0 | 0 #DIV/0! | 0 | 0 |
| YHR073C- <i>f</i> | 0 | 0 | 0 | 0 | 0 | 0 #DIV/0! | 0 | 0 |
| YHR073W- <i>f</i> | 0 | 0 | 0 | 0 | 0 | 0 #DIV/0! | 0 | 0 |
| YHR137C- <i>f</i> | 0 | 0 | 0 | 0 | 0 | 0 #DIV/0! | 0 | 0 |
| YHR165W- <i>f</i> | 0 | 0 | 0 | 0 | 0 | 0 #DIV/0! | 0 | 0 |
| YHR180C- <i>f</i> | 0 | 0 | 0 | 0 | 0 | 0 #DIV/0! | 0 | 0 |
| YHR182C- <i>f</i> | 0 | 0 | 0 | 0 | 0 | 0 #DIV/0! | 0 | 0 |
| YHR193C- <i>f</i> | 0 | 0 | 0 | 0 | 0 | 0 #DIV/0! | 0 | 0 |
| YHR212C           | 0 | 0 | 0 | 0 | 0 | 0 #DIV/0! | 0 | 0 |
| YHR212W- <i>f</i> | 0 | 0 | 0 | 0 | 0 | 0 #DIV/0! | 0 | 0 |
| YHR219C- <i>f</i> | 0 | 0 | 0 | 0 | 0 | 0 #DIV/0! | 0 | 0 |
| YIL021C- <i>f</i> | 0 | 0 | 0 | 0 | 0 | 0 #DIV/0! | 0 | 0 |
| YIL029W- <i>f</i> | 0 | 0 | 0 | 0 | 0 | 0 #DIV/0! | 0 | 0 |
| YIL059C           | 0 | 0 | 0 | 0 | 0 | 0 #DIV/0! | 0 | 0 |
| YIL066W- <i>f</i> | 0 | 0 | 0 | 0 | 0 | 0 #DIV/0! | 0 | 0 |
| YIL100C- <i>f</i> | 0 | 0 | 0 | 0 | 0 | 0 #DIV/0! | 0 | 0 |

|                   |   |   |   |   |   |           |   |   |
|-------------------|---|---|---|---|---|-----------|---|---|
| YIL105W- <i>f</i> | 0 | 0 | 0 | 0 | 0 | 0 #DIV/0! | 0 | 0 |
| YIL142C- <i>f</i> | 0 | 0 | 0 | 0 | 0 | 0 #DIV/0! | 0 | 0 |
| YIL156W- <i>f</i> | 0 | 0 | 0 | 0 | 0 | 0 #DIV/0! | 0 | 0 |
| YIL171W- <i>f</i> | 0 | 0 | 0 | 0 | 0 | 0 #DIV/0! | 0 | 0 |
| YIL176C           | 0 | 0 | 0 | 0 | 0 | 0 #DIV/0! | 0 | 0 |
| YIL177W- <i>f</i> | 0 | 0 | 0 | 0 | 0 | 0 #DIV/0! | 0 | 0 |
| YIR017C           | 0 | 0 | 0 | 0 | 0 | 0 #DIV/0! | 0 | 0 |
| YIR041W           | 0 | 0 | 0 | 0 | 0 | 0 #DIV/0! | 0 | 0 |
| YJL015C           | 0 | 0 | 0 | 0 | 0 | 0 #DIV/0! | 0 | 0 |
| YJL020W- <i>f</i> | 0 | 0 | 0 | 0 | 0 | 0 #DIV/0! | 0 | 0 |
| YJL026C- <i>f</i> | 0 | 0 | 0 | 0 | 0 | 0 #DIV/0! | 0 | 0 |
| YJL077W- <i>f</i> | 0 | 0 | 0 | 0 | 0 | 0 #DIV/0! | 0 | 0 |
| YJL197C- <i>f</i> | 0 | 0 | 0 | 0 | 0 | 0 #DIV/0! | 0 | 0 |
| YJL217W           | 0 | 0 | 0 | 0 | 0 | 0 #DIV/0! | 0 | 0 |
| YJL222W- <i>f</i> | 0 | 0 | 0 | 0 | 0 | 0 #DIV/0! | 0 | 0 |
| YJL225W- <i>f</i> | 0 | 0 | 0 | 0 | 0 | 0 #DIV/0! | 0 | 0 |
| YJR022W           | 0 | 0 | 0 | 0 | 0 | 0 #DIV/0! | 0 | 0 |
| YJR140W- <i>f</i> | 0 | 0 | 0 | 0 | 0 | 0 #DIV/0! | 0 | 0 |
| YKL100W- <i>f</i> | 0 | 0 | 0 | 0 | 0 | 0 #DIV/0! | 0 | 0 |
| YKL145W- <i>f</i> | 0 | 0 | 0 | 0 | 0 | 0 #DIV/0! | 0 | 0 |
| YKL156C- <i>f</i> | 0 | 0 | 0 | 0 | 0 | 0 #DIV/0! | 0 | 0 |
| YKL224C           | 0 | 0 | 0 | 0 | 0 | 0 #DIV/0! | 0 | 0 |
| YKR033C           | 0 | 0 | 0 | 0 | 0 | 0 #DIV/0! | 0 | 0 |
| YKR035W- <i>f</i> | 0 | 0 | 0 | 0 | 0 | 0 #DIV/0! | 0 | 0 |
| YKR075W- <i>f</i> | 0 | 0 | 0 | 0 | 0 | 0 #DIV/0! | 0 | 0 |
| YLL019W- <i>f</i> | 0 | 0 | 0 | 0 | 0 | 0 #DIV/0! | 0 | 0 |
| YLL037W           | 0 | 0 | 0 | 0 | 0 | 0 #DIV/0! | 0 | 0 |
| YLL044W           | 0 | 0 | 0 | 0 | 0 | 0 #DIV/0! | 0 | 0 |
| YLL066W- <i>f</i> | 0 | 0 | 0 | 0 | 0 | 0 #DIV/0! | 0 | 0 |
| YLL066W- <i>f</i> | 0 | 0 | 0 | 0 | 0 | 0 #DIV/0! | 0 | 0 |
| YLL067W- <i>f</i> | 0 | 0 | 0 | 0 | 0 | 0 #DIV/0! | 0 | 0 |
| YLR101C           | 0 | 0 | 0 | 0 | 0 | 0 #DIV/0! | 0 | 0 |
| YLR155C           | 0 | 0 | 0 | 0 | 0 | 0 #DIV/0! | 0 | 0 |
| YLR156C- <i>f</i> | 0 | 0 | 0 | 0 | 0 | 0 #DIV/0! | 0 | 0 |
| YLR156W           | 0 | 0 | 0 | 0 | 0 | 0 #DIV/0! | 0 | 0 |
| YLR157C           | 0 | 0 | 0 | 0 | 0 | 0 #DIV/0! | 0 | 0 |
| YLR157C- <i>f</i> | 0 | 0 | 0 | 0 | 0 | 0 #DIV/0! | 0 | 0 |
| YLR158C           | 0 | 0 | 0 | 0 | 0 | 0 #DIV/0! | 0 | 0 |
| YLR159C- <i>f</i> | 0 | 0 | 0 | 0 | 0 | 0 #DIV/0! | 0 | 0 |
| YLR159W           | 0 | 0 | 0 | 0 | 0 | 0 #DIV/0! | 0 | 0 |
| YLR160C           | 0 | 0 | 0 | 0 | 0 | 0 #DIV/0! | 0 | 0 |
| YLR161W           | 0 | 0 | 0 | 0 | 0 | 0 #DIV/0! | 0 | 0 |
| YLR163W- <i>f</i> | 0 | 0 | 0 | 0 | 0 | 0 #DIV/0! | 0 | 0 |
| YLR170C           | 0 | 0 | 0 | 0 | 0 | 0 #DIV/0! | 0 | 0 |
| YLR235C           | 0 | 0 | 0 | 0 | 0 | 0 #DIV/0! | 0 | 0 |
| YLR280C           | 0 | 0 | 0 | 0 | 0 | 0 #DIV/0! | 0 | 0 |
| YLR286W- <i>f</i> | 0 | 0 | 0 | 0 | 0 | 0 #DIV/0! | 0 | 0 |
| YLR299C- <i>f</i> | 0 | 0 | 0 | 0 | 0 | 0 #DIV/0! | 0 | 0 |
| YLR317W           | 0 | 0 | 0 | 0 | 0 | 0 #DIV/0! | 0 | 0 |
| YLR347W- <i>f</i> | 0 | 0 | 0 | 0 | 0 | 0 #DIV/0! | 0 | 0 |
| YLR364C- <i>f</i> | 0 | 0 | 0 | 0 | 0 | 0 #DIV/0! | 0 | 0 |
| YLR366W           | 0 | 0 | 0 | 0 | 0 | 0 #DIV/0! | 0 | 0 |
| YLR399W- <i>f</i> | 0 | 0 | 0 | 0 | 0 | 0 #DIV/0! | 0 | 0 |
| YLR462W           | 0 | 0 | 0 | 0 | 0 | 0 #DIV/0! | 0 | 0 |

|                   |   |   |   |   |   |           |   |   |
|-------------------|---|---|---|---|---|-----------|---|---|
| YLR463C           | 0 | 0 | 0 | 0 | 0 | 0 #DIV/0! | 0 | 0 |
| YLR465C           | 0 | 0 | 0 | 0 | 0 | 0 #DIV/0! | 0 | 0 |
| YLR466C- <i>t</i> | 0 | 0 | 0 | 0 | 0 | 0 #DIV/0! | 0 | 0 |
| YLR467C- <i>t</i> | 0 | 0 | 0 | 0 | 0 | 0 #DIV/0! | 0 | 0 |
| YML009W- <i>I</i> | 0 | 0 | 0 | 0 | 0 | 0 #DIV/0! | 0 | 0 |
| YML101C- <i>t</i> | 0 | 0 | 0 | 0 | 0 | 0 #DIV/0! | 0 | 0 |
| YML133W- <i>t</i> | 0 | 0 | 0 | 0 | 0 | 0 #DIV/0! | 0 | 0 |
| YML133W- <i>I</i> | 0 | 0 | 0 | 0 | 0 | 0 #DIV/0! | 0 | 0 |
| YMR013C- <i>t</i> | 0 | 0 | 0 | 0 | 0 | 0 #DIV/0! | 0 | 0 |
| YMR031W- <i>t</i> | 0 | 0 | 0 | 0 | 0 | 0 #DIV/0! | 0 | 0 |
| YMR141W- <i>t</i> | 0 | 0 | 0 | 0 | 0 | 0 #DIV/0! | 0 | 0 |
| YMR153C- <i>t</i> | 0 | 0 | 0 | 0 | 0 | 0 #DIV/0! | 0 | 0 |
| YMR272W- <i>t</i> | 0 | 0 | 0 | 0 | 0 | 0 #DIV/0! | 0 | 0 |
| YMR307C- <i>t</i> | 0 | 0 | 0 | 0 | 0 | 0 #DIV/0! | 0 | 0 |
| YNL013C           | 0 | 0 | 0 | 0 | 0 | 0 #DIV/0! | 0 | 0 |
| YNL097W- <i>t</i> | 0 | 0 | 0 | 0 | 0 | 0 #DIV/0! | 0 | 0 |
| YNL120C           | 0 | 0 | 0 | 0 | 0 | 0 #DIV/0! | 0 | 0 |
| YNL144W- <i>t</i> | 0 | 0 | 0 | 0 | 0 | 0 #DIV/0! | 0 | 0 |
| YNL171C           | 0 | 0 | 0 | 0 | 0 | 0 #DIV/0! | 0 | 0 |
| YNL174W           | 0 | 0 | 0 | 0 | 0 | 0 #DIV/0! | 0 | 0 |
| YNL226W           | 0 | 0 | 0 | 0 | 0 | 0 #DIV/0! | 0 | 0 |
| YNL228W           | 0 | 0 | 0 | 0 | 0 | 0 #DIV/0! | 0 | 0 |
| YNL296W           | 0 | 0 | 0 | 0 | 0 | 0 #DIV/0! | 0 | 0 |
| YNL339W- <i>t</i> | 0 | 0 | 0 | 0 | 0 | 0 #DIV/0! | 0 | 0 |
| YNL339W- <i>I</i> | 0 | 0 | 0 | 0 | 0 | 0 #DIV/0! | 0 | 0 |
| YNR003W- <i>t</i> | 0 | 0 | 0 | 0 | 0 | 0 #DIV/0! | 0 | 0 |
| YNR042W           | 0 | 0 | 0 | 0 | 0 | 0 #DIV/0! | 0 | 0 |
| YOL083C- <i>t</i> | 0 | 0 | 0 | 0 | 0 | 0 #DIV/0! | 0 | 0 |
| YOL150C           | 0 | 0 | 0 | 0 | 0 | 0 #DIV/0! | 0 | 0 |
| YOL163W           | 0 | 0 | 0 | 0 | 0 | 0 #DIV/0! | 0 | 0 |
| YOL164W           | 0 | 0 | 0 | 0 | 0 | 0 #DIV/0! | 0 | 0 |
| YOL164W- <i>t</i> | 0 | 0 | 0 | 0 | 0 | 0 #DIV/0! | 0 | 0 |
| YOL166W- <i>t</i> | 0 | 0 | 0 | 0 | 0 | 0 #DIV/0! | 0 | 0 |
| YOR068C           | 0 | 0 | 0 | 0 | 0 | 0 #DIV/0! | 0 | 0 |
| YOR108C- <i>t</i> | 0 | 0 | 0 | 0 | 0 | 0 #DIV/0! | 0 | 0 |
| YOR161W- <i>t</i> | 0 | 0 | 0 | 0 | 0 | 0 #DIV/0! | 0 | 0 |
| YOR161W- <i>I</i> | 0 | 0 | 0 | 0 | 0 | 0 #DIV/0! | 0 | 0 |
| YOR169C           | 0 | 0 | 0 | 0 | 0 | 0 #DIV/0! | 0 | 0 |
| YOR186C- <i>t</i> | 0 | 0 | 0 | 0 | 0 | 0 #DIV/0! | 0 | 0 |
| YOR200W           | 0 | 0 | 0 | 0 | 0 | 0 #DIV/0! | 0 | 0 |
| YOR231C- <i>t</i> | 0 | 0 | 0 | 0 | 0 | 0 #DIV/0! | 0 | 0 |
| YOR277C           | 0 | 0 | 0 | 0 | 0 | 0 #DIV/0! | 0 | 0 |
| YOR325W           | 0 | 0 | 0 | 0 | 0 | 0 #DIV/0! | 0 | 0 |
| YOR333C           | 0 | 0 | 0 | 0 | 0 | 0 #DIV/0! | 0 | 0 |
| YOR335W- <i>t</i> | 0 | 0 | 0 | 0 | 0 | 0 #DIV/0! | 0 | 0 |
| YOR379C           | 0 | 0 | 0 | 0 | 0 | 0 #DIV/0! | 0 | 0 |
| YOR394C- <i>t</i> | 0 | 0 | 0 | 0 | 0 | 0 #DIV/0! | 0 | 0 |
| YOR394W           | 0 | 0 | 0 | 0 | 0 | 0 #DIV/0! | 0 | 0 |
| YOR396C- <i>t</i> | 0 | 0 | 0 | 0 | 0 | 0 #DIV/0! | 0 | 0 |
| YPL044C           | 0 | 0 | 0 | 0 | 0 | 0 #DIV/0! | 0 | 0 |
| YPL114W           | 0 | 0 | 0 | 0 | 0 | 0 #DIV/0! | 0 | 0 |
| YPL135C- <i>t</i> | 0 | 0 | 0 | 0 | 0 | 0 #DIV/0! | 0 | 0 |
| YPL136W           | 0 | 0 | 0 | 0 | 0 | 0 #DIV/0! | 0 | 0 |
| YPL222C- <i>t</i> | 0 | 0 | 0 | 0 | 0 | 0 #DIV/0! | 0 | 0 |

|                       |   |   |   |   |   |           |   |   |
|-----------------------|---|---|---|---|---|-----------|---|---|
| YPL250W- <del>l</del> | 0 | 0 | 0 | 0 | 0 | 0 #DIV/0! | 0 | 0 |
| YPL251W               | 0 | 0 | 0 | 0 | 0 | 0 #DIV/0! | 0 | 0 |
| YPL282C               | 0 | 0 | 0 | 0 | 0 | 0 #DIV/0! | 0 | 0 |
| YPL283W- <del>l</del> | 0 | 0 | 0 | 0 | 0 | 0 #DIV/0! | 0 | 0 |
| YPL283W- <del>l</del> | 0 | 0 | 0 | 0 | 0 | 0 #DIV/0! | 0 | 0 |
| YPR038W               | 0 | 0 | 0 | 0 | 0 | 0 #DIV/0! | 0 | 0 |
| YPR039W               | 0 | 0 | 0 | 0 | 0 | 0 #DIV/0! | 0 | 0 |
| YPR050C               | 0 | 0 | 0 | 0 | 0 | 0 #DIV/0! | 0 | 0 |
| YPR077C               | 0 | 0 | 0 | 0 | 0 | 0 #DIV/0! | 0 | 0 |
| YPR160C- <del>l</del> | 0 | 0 | 0 | 0 | 0 | 0 #DIV/0! | 0 | 0 |
| YPR160W- <del>l</del> | 0 | 0 | 0 | 0 | 0 | 0 #DIV/0! | 0 | 0 |
| YPR169W- <del>l</del> | 0 | 0 | 0 | 0 | 0 | 0 #DIV/0! | 0 | 0 |
| YPR170W- <del>l</del> | 0 | 0 | 0 | 0 | 0 | 0 #DIV/0! | 0 | 0 |
| YPR177C               | 0 | 0 | 0 | 0 | 0 | 0 #DIV/0! | 0 | 0 |
| YPR203W               | 0 | 0 | 0 | 0 | 0 | 0 #DIV/0! | 0 | 0 |
| YPR204C- <del>l</del> | 0 | 0 | 0 | 0 | 0 | 0 #DIV/0! | 0 | 0 |

| expressed genes |          |          |          |                     |                      |  |
|-----------------|----------|----------|----------|---------------------|----------------------|--|
| WE_PT_2         | WE_PT_3  | WE_PT_4  | Ratio    | DESEQ p adj WA vs W | DESEQ p adj WE vs WE |  |
| 6353.282        | 6074.573 | 6459.594 | -1.12088 | 0.027170262         | 3.86469E-25          |  |
| 2488.242        | 2185.88  | 2271.966 | -1.38686 | 0.012378121         | 2.01498E-22          |  |
| 976.5346        | 986.5723 | 896.0014 | -0.04531 | 0.003408242         | 0.87466351           |  |
| 3461.203        | 3191.961 | 2842.054 | 0.47986  | 0.294546467         | 0.000316693          |  |
| 64.32799        | 72.46011 | 49.25388 | 1.118774 | 0.458109598         | 0.000210289          |  |
| 895.2311        | 847.2259 | 926.3921 | 0.286586 | 0.054030267         | 0.083362707          |  |
| 214.4266        | 211.8065 | 184.4401 | -0.04188 | 0.004702869         | 0.922546597          |  |
| 10537.28        | 10713.88 | 11890.1  | -0.51811 | 0.706392555         | 2.24404E-05          |  |
| 11.61478        | 7.431806 | 7.335684 | -0.74971 | 0.730407446         | 0.168011786          |  |
| 3423.678        | 3377.756 | 2968.856 | -0.24414 | 0.864617666         | 0.086902545          |  |
| 124.1888        | 130.9856 | 120.5148 | 0.691215 | 0.186913093         | 0.003993975          |  |
| 0               | 1.857952 | 2.09591  | #DIV/0!  | 0.78798308          | 0.286863208          |  |
| 339.5088        | 325.1415 | 356.3047 | -0.97525 | 0.73478662          | 4.23639E-08          |  |
| 1552.806        | 1688.878 | 1591.843 | 0.096678 | 0.15308256          | 0.638524044          |  |
| 3.573777        | 5.573855 | 5.239774 | -0.78356 | 0.547164305         | 0.415175074          |  |
| 34.84433        | 34.3721  | 29.34274 | -0.29944 | 0.546104275         | 0.465657685          |  |
| 1354.461        | 1280.129 | 1401.116 | -0.57761 | 0.515068409         | 2.16222E-05          |  |
| 1397.347        | 1390.677 | 1444.082 | -0.58819 | 0.732140966         | 5.20296E-07          |  |
| 52.71321        | 42.73289 | 44.01411 | -0.0028  | 0.12999813          | 0.975879427          |  |
| 20605.5         | 20559.16 | 18642.07 | -0.15409 | 0.059230691         | 0.381582724          |  |
| 3632.744        | 3802.298 | 3992.708 | -0.1337  | 0.484643556         | 0.388037549          |  |
| 14043.16        | 13632.72 | 14064.6  | -0.23603 | 0.614621507         | 0.241819205          |  |
| 1.786889        | 0        | 0        | -0.91651 | 0.542904501         | 0.835596295          |  |
| 5946.765        | 5896.209 | 6320.216 | -0.18874 | 0.158071272         | 0.19887348           |  |
| 37.52466        | 34.3721  | 54.49365 | -0.53053 | 0.004616731         | 0.088947033          |  |
| 503.0091        | 500.7179 | 507.2102 | 0.413688 | 0.990604058         | 0.064390809          |  |
| 1559.954        | 1781.776 | 1722.838 | -0.15924 | 0.649714874         | 0.422560599          |  |
| 22916.85        | 23307.07 | 20944.43 | 0.090238 | 0.637435429         | 0.536500997          |  |
| 27.69677        | 36.23005 | 47.15797 | -0.15296 | 0.651806624         | 0.758356955          |  |
| 37.52466        | 87.32372 | 31.43865 | -0.09678 | 0.953670495         | 0.908612163          |  |
| 134.9101        | 115.193  | 171.8646 | 0.078639 | 0.919799198         | 0.886786965          |  |
| 1327.658        | 1321.933 | 1592.891 | -0.32686 | 0.98843748          | 0.089560109          |  |
| 44320.2         | 42404.96 | 47848.57 | -0.13625 | 0.883628087         | 0.923725803          |  |
| 7.147554        | 2.786927 | 1.047955 | -0.60495 | 0.98299578          | 0.670601121          |  |
| 1040.863        | 983.7853 | 785.9662 | -0.64755 | 0.603004299         | 0.000188607          |  |
| 37.52466        | 29.72722 | 24.10296 | 0.323    | 0.662090696         | 0.483238043          |  |
| 0               | 0        | 0        | #DIV/0!  | 0.844410461         | 0.990142758          |  |
| 684.3783        | 663.2887 | 737.7602 | -0.131   | 0.40625521          | 0.493837083          |  |
| 0               | 0        | 0        | #DIV/0!  | 0.189698167         | 0.990142758          |  |
| 305.5579        | 264.7581 | 292.3794 | 0.090345 | 0.990604058         | 0.826228143          |  |
| 2912.628        | 2674.521 | 2949.993 | 0.118727 | 0.690439171         | 0.558104763          |  |
| 0               | 0        | 0        | #DIV/0!  | 0.555061446         | 0.990142758          |  |
| 3.573777        | 6.50283  | 3.143865 | -0.50484 | 0.600008341         | 0.718291318          |  |
| 29.48366        | 18.57952 | 41.9182  | -0.09505 | 0.094904827         | 0.907473183          |  |
| 975.6411        | 892.7457 | 1045.859 | 0.521982 | 0.125163885         | 0.000116053          |  |
| 45345.87        | 44798    | 42196.95 | -0.09998 | 0.272911001         | 0.378149996          |  |
| 1195.428        | 1178.87  | 1147.511 | -0.61162 | 8.72064E-09         | 1.71746E-11          |  |
| 3.573777        | 12.07668 | 1.047955 | 0.745807 | 0.172063056         | 0.545985077          |  |
| 969.387         | 946.6263 | 879.2342 | -0.25524 | 0.226746984         | 0.027336701          |  |
| 31104.37        | 29714.22 | 33195.02 | -0.14091 | 0.948896953         | 0.36518668           |  |



|          |          |          |          |             |             |
|----------|----------|----------|----------|-------------|-------------|
| 1778.848 | 1813.361 | 1767.9   | 0.258487 | 0.182617755 | 0.13251575  |
| 1.786889 | 0        | 0        | -0.55981 | 0.614621507 | 0.836555519 |
| 4.467221 | 2.786927 | 6.287729 | -0.41221 | 0.614563272 | 0.726171034 |
| 0.893444 | 2.786927 | 0        | 1.125891 | 0.867574132 | 0.656368654 |
| 1133.781 | 1240.183 | 1215.628 | -0.03441 | 0.128482365 | 0.921976304 |
| 338.6154 | 376.2352 | 318.5783 | -0.39499 | 0.07122269  | 0.113402813 |
| 2330.996 | 2231.4   | 2451.166 | 0.215802 | 1.87221E-20 | 0.129766751 |
| 9474.976 | 9526.646 | 8689.642 | -0.53816 | 0.000676906 | 4.97881E-11 |
| 5.360666 | 7.431806 | 12.57546 | -0.70905 | 3.15538E-09 | 0.333065318 |
| 145.6314 | 109.6191 | 136.2341 | -0.39457 | 0.527593235 | 0.093593    |
| 4450.246 | 4602.146 | 4671.783 | -0.24643 | 0.753964428 | 0.031785223 |
| 86.66409 | 107.7612 | 104.7955 | -0.17741 | 8.48569E-11 | 0.595423496 |
| 6128.134 | 5849.76  | 5284.837 | -0.55332 | 0.585115533 | 3.99971E-09 |
| 281.4349 | 299.1302 | 337.4415 | 0.130639 | 0.02597477  | 0.588622174 |
| 489.6075 | 462.6299 | 438.0451 | -0.59796 | 0.120800067 | 0.000280828 |
| 892.5508 | 981.9274 | 1019.66  | -0.34893 | 0.962011634 | 0.03084725  |
| 209.066  | 222.0252 | 214.8308 | -0.03317 | 0.061571261 | 0.914772543 |
| 8709.295 | 9353.857 | 7135.525 | -0.16824 | 0.944990108 | 0.355130219 |
| 121981.1 | 119492.3 | 110459.7 | -0.11933 | 0.733488302 | 0.353286634 |
| 105.4264 | 121.6958 | 98.50776 | -0.14402 | 0.92288341  | 0.655129754 |
| 661.1488 | 597.3314 | 520.8336 | -0.08298 | 0.861862766 | 0.834332496 |
| 4276.024 | 4053.121 | 4616.241 | 0.098181 | 0.031086718 | 0.576591259 |
| 136.697  | 135.6305 | 180.2482 | -0.3985  | 0.990604058 | 0.351487828 |
| 1057.838 | 938.2655 | 1045.859 | -0.94983 | 0.134941849 | 0.026729458 |
| 253.7382 | 308.42   | 268.2765 | -0.09358 | 0.974826797 | 0.684131921 |
| 0        | 0        | 0        | #NUM!    | 0.58371648  | 0.342128545 |
| 695.0996 | 652.141  | 637.1566 | 0.274234 | 0.957996061 | 0.162717225 |
| 1668.954 | 1614.56  | 1728.078 | 0.05839  | 0.670951846 | 0.80030609  |
| 359.1646 | 458.914  | 498.8265 | -0.7048  | 0.081828292 | 1.89846E-06 |
| 9611.673 | 9685.501 | 8642.484 | -0.36509 | 0.004702869 | 0.000988656 |
| 5693.027 | 5872.056 | 5862.26  | -0.0581  | 6.44159E-19 | 0.614824771 |
| 149.2052 | 173.7185 | 206.4471 | -0.71161 | 2.1131E-07  | 4.14592E-05 |
| 4337.672 | 4624.441 | 4507.254 | -0.07644 | 0.826203568 | 0.5847566   |
| 6375.618 | 6618.023 | 6135.776 | -0.73031 | 1.30946E-07 | 9.07231E-14 |
| 1362.502 | 1251.33  | 1382.253 | -0.30573 | 0.004149955 | 0.038141651 |
| 0        | 0        | 0        | #DIV/0!  | 0.662355315 | 0.990142758 |
| 305.5579 | 290.7694 | 266.1805 | 0.09361  | 0.767527949 | 0.813492611 |
| 10307.67 | 10356.22 | 11754.91 | 0.289893 | 0.810878938 | 0.028626623 |
| 460.1238 | 437.5476 | 500.9224 | -0.0672  | 0.91441696  | 0.811818841 |
| 638.8126 | 604.7632 | 472.6277 | -0.44511 | 0.621093622 | 0.039433267 |
| 1814.585 | 1964.784 | 1927.189 | 0.359345 | 0.13734229  | 0.000319026 |
| 23213.47 | 23870.96 | 21212.7  | -0.00159 | 0.193158044 | 0.993537704 |
| 423.4926 | 480.2805 | 625.6291 | 0.190867 | 0.070427808 | 0.411765294 |
| 1299.961 | 1224.39  | 1423.123 | 0.547537 | 0.504924333 | 7.58405E-05 |
| 29851.76 | 29163.34 | 27399.83 | -0.01511 | 0.753964428 | 0.931618549 |
| 234.0824 | 182.0792 | 171.8646 | -0.70945 | 0.192357364 | 0.039860461 |
| 234.0824 | 208.0906 | 314.3865 | -0.15109 | 0.826883467 | 0.644875718 |
| 3842.704 | 3530.108 | 4388.835 | -0.20552 | 0.743382516 | 0.172785623 |
| 530.7059 | 509.0787 | 703.1777 | -0.01895 | 0.861070915 | 0.954839814 |
| 17513.29 | 18023.99 | 17273.44 | -0.0756  | 0.189947746 | 0.562110601 |
| 414.5581 | 477.4935 | 506.1622 | -0.04825 | 0.022126119 | 0.88945982  |
| 89.34443 | 90.11065 | 126.8025 | -0.54068 | 0.990604058 | 0.27042216  |
| 17991.29 | 18602.74 | 20732.74 | 0.128448 | 0.173563763 | 0.338625904 |
| 23.22955 | 44.59084 | 23.05501 | -0.31259 | 0.312335761 | 0.527784555 |

10. 72133 8. 360782 3. 143865 -0. 77742  
 4429. 697 4220. 337 4159. 333 0. 167971  
 259. 9923 332. 5733 358. 4006 -0. 75117  
 0 0 0 #DIV/0!  
 2122. 824 2154. 295 2206. 993 0. 371889  
 1050. 69 1031. 163 1161. 134 0. 098519  
 0 0 0 #NUM!  
 41. 99188 31. 58518 26. 19887 -0. 62731  
 128. 656 126. 3407 183. 3921 0. 502212  
 6128. 134 5853. 476 7306. 342 -0. 27914  
 354. 6974 290. 7694 475. 7715 0. 389238  
 225. 148 203. 4457 223. 2144 -1. 04371  
 4406. 467 4400. 558 5357. 145 -0. 26695  
 158. 1396 169. 0736 127. 8505 0. 023013  
 0 0 0 #DIV/0!  
 68. 79521 59. 45445 50. 30183 -0. 57153  
 111. 6805 133. 7725 154. 0494 -0. 26358  
 119. 7215 163. 4997 182. 3442 0. 142605  
 999. 7641 1101. 765 1255. 45 0. 656614  
 820. 1818 853. 7287 989. 2694 -0. 90652  
 12650. 28 12398. 11 14067. 75 -0. 06282  
 769. 2555 815. 6407 822. 6446 -0. 86253  
 1007. 805 910. 3962 1104. 544 0. 693165  
 194. 7708 214. 5934 315. 4344 -0. 6172  
 243. 9103 248. 0365 245. 2214 -0. 28914  
 900. 5918 908. 5383 953. 639 0. 0908  
 554. 8289 654. 9279 581. 615 -0. 31469  
 7142. 193 7324. 974 8612. 093 0. 070244  
 2225. 57 2185. 88 2169. 267 -0. 07136  
 8085. 671 8211. 217 7921. 491 0. 152784  
 1639. 47 1732. 54 1667. 296 0. 090979  
 460. 1238 423. 6129 439. 0931 -0. 04019  
 13648. 25 12893. 25 15358. 83 -0. 22995  
 9831. 461 9701. 294 11152. 34 -0. 04451  
 43. 77877 26. 9403 27. 24683 -0. 20686  
 1035. 502 968. 9217 1032. 236 -0. 34817  
 20. 54922 20. 43747 19. 91114 -0. 35873  
 2909. 948 2917. 913 2795. 944 -0. 71317  
 75. 04932 78. 03396 95. 3639 -0. 23829  
 7781. 006 8030. 995 9627. 562 -0. 83631  
 1628. 749 1636. 855 1799. 339 -0. 10099  
 173473. 8 167271. 4 165214. 3 -0. 05643  
 3360. 244 3151. 086 3625. 924 -0. 10638  
 1526. 896 1482. 645 1553. 069 0. 114212  
 1275. 838 1219. 745 1231. 347 0. 03651  
 0 1. 857952 0 #DIV/0!  
 246. 5906 261. 0422 251. 5092 0. 068187  
 0 0 0 #DIV/0!  
 1405. 388 1445. 486 1678. 824 0. 101312  
 1943. 241 1763. 196 1672. 536 0. 159192  
 8326. 007 8063. 51 8577. 511 0. 159424  
 1164. 158 1102. 694 1314. 135 0. 123139  
 386. 8614 380. 8801 523. 9774 -0. 64029  
 424. 386 470. 9907 513. 4979 0. 377547

0. 072365168  
 0. 036671148  
 1. 38834E-05  
 0. 907095813  
 0. 837998472  
 0. 182335052  
 0. 925713018  
 0. 963492814  
 0. 045192099  
 0. 527593235  
 0. 80496489  
 0. 165543705  
 0. 899653152  
 0. 98409529  
 0. 682184622  
 0. 362090257  
 0. 681419018  
 0. 151730694  
 0. 894528942  
 0. 000701205  
 2. 46892E-37  
 5. 99679E-07  
 0. 029779632  
 0. 886112674  
 0. 585115533  
 1. 28599E-05  
 3. 6065E-05  
 0. 484084014  
 0. 826883467  
 0. 416597489  
 0. 478079371  
 0. 669419617  
 0. 351290569  
 0. 944990108  
 0. 028010538  
 0. 261041442  
 0. 967813477  
 0. 000217366  
 0. 969843993  
 0. 001290762  
 0. 270719269  
 0. 967813477  
 0. 614621507  
 0. 455280748  
 7. 43351E-21  
 0. 959739969  
 0. 738405909  
 0. 654781049  
 8. 77792E-20  
 0. 867574132  
 0. 016500228  
 0. 792868376  
 0. 995598118  
 0. 090626117

0. 351487828  
 0. 118990473  
 4. 34522E-06  
 0. 990142758  
 0. 001092886  
 0. 664575474  
 0. 169296115  
 0. 112630735  
 0. 060227128  
 0. 058035556  
 0. 142939621  
 0. 016996857  
 0. 102776029  
 0. 973438605  
 0. 990142758  
 0. 045970851  
 0. 317745056  
 0. 696921855  
 0. 000266857  
 2. 13594E-10  
 0. 664491515  
 4. 24394E-08  
 2. 65543E-05  
 0. 002842502  
 0. 163640813  
 0. 590570691  
 0. 216876753  
 0. 759231714  
 0. 694075461  
 0. 098741638  
 0. 572980704  
 0. 914120833  
 0. 083993003  
 0. 844571336  
 0. 69424407  
 0. 012748693  
 0. 556915963  
 1. 85992E-19  
 0. 477962261  
 6. 12454E-15  
 0. 564967632  
 0. 752110266  
 0. 567449963  
 0. 459459722  
 0. 847597088  
 0. 583691606  
 0. 802920813  
 0. 990142758  
 0. 544257884  
 0. 322653852  
 0. 238463934  
 0. 656460739  
 0. 000246256  
 0. 106176664

|          |          |          |          |                |             |
|----------|----------|----------|----------|----------------|-------------|
| 136.697  | 143.0623 | 129.9464 | -0.29786 | 0.767300341    | 0.2533373   |
| 468.1648 | 489.5702 | 400.3188 | 0.288235 | 0.040355829    | 0.255165763 |
| 12780.72 | 13140.36 | 13653.8  | 0.589302 | 0.651961753    | 4.81136E-09 |
| 236.7627 | 203.4457 | 278.756  | -0.23202 | 0.004455063    | 0.56192082  |
| 943.4771 | 1060.89  | 1166.374 | -0.34552 | 0.003329096    | 0.037467608 |
| 1517.962 | 1399.966 | 1304.704 | 0.23055  | 0.723947258    | 0.232212558 |
| 12084.73 | 11886.24 | 12720.08 | 0.066868 | 0.94035236     | 0.724404377 |
| 0        | 0        | 0        | #DIV/0!  | 0.207579254    | 0.990142758 |
| 344.8695 | 393.8857 | 376.2158 | -0.02852 | 0.862474177    | 0.942591831 |
| 1032.822 | 1028.376 | 1075.202 | -0.61474 | 0.880606478    | 0.000111761 |
| 771.0424 | 949.4132 | 1064.722 | -0.45727 | 0.582750031    | 0.003921392 |
| 154.5659 | 135.6305 | 171.8646 | 0.380992 | 0.01405096     | 0.3930505   |
| 1593.905 | 1385.103 | 1912.518 | -0.20055 | 1.01191E-18    | 0.383759687 |
| 0        | 1.857952 | 0        | -0.50354 | 0.92288341     | 0.840718213 |
| 317.1727 | 310.2779 | 426.5176 | -0.59567 | 0.431874361    | 9.85399E-05 |
| 1819.946 | 1777.131 | 2153.547 | -0.43836 | 0.498379067    | 0.001931053 |
| 789.8047 | 842.581  | 869.8026 | 0.078987 | 0.735300868    | 0.744396459 |
| 2951.046 | 2872.393 | 3632.212 | 0.299981 | 0.722604138    | 0.109807224 |
| 2555.251 | 2550.967 | 3033.829 | -0.19704 | 0.666493976    | 0.219522094 |
| 2320.275 | 2380.036 | 2112.677 | 0.075446 | 0.780429274    | 0.669238482 |
| 2656.21  | 2625.286 | 2799.088 | -0.09739 | 0.228465218    | 0.584884922 |
| 0        | 0        | 0        | #DIV/0!  | 0.975298616 NA |             |
| 2138.012 | 2158.011 | 2098.006 | -0.12015 | 1.51549E-25    | 0.38666632  |
| 15.18855 | 18.57952 | 23.05501 | 0.138092 | 0.081224331    | 0.875604624 |
| 16004.27 | 16048.99 | 15323.2  | 0.074701 | 0.689047979    | 0.616511903 |
| 51.81977 | 31.58518 | 50.30183 | 0.208637 | 0.746342492    | 0.738359307 |
| 4967.55  | 4951.441 | 5065.814 | 0.113267 | 0.723947258    | 0.364490432 |
| 2141.586 | 1883.034 | 1990.066 | 0.13596  | 0.967813477    | 0.434126424 |
| 939.0099 | 786.8425 | 949.4471 | -0.3299  | 0.576135666    | 0.036801389 |
| 4262.623 | 4277.933 | 4662.351 | 0.002726 | 0.901380807    | 0.990023409 |
| 229.6152 | 219.2383 | 255.701  | -0.05586 | 0.31587804     | 0.90550917  |
| 1858.364 | 1856.094 | 2050.848 | -0.01587 | 0.986807798    | 0.94960537  |
| 1407.175 | 1419.475 | 1490.192 | 0.078132 | 0.745645324    | 0.679871393 |
| 1039.076 | 1042.311 | 1205.148 | -1.3243  | 0.430087902    | 1.4546E-29  |
| 8201.818 | 8332.913 | 10050.94 | 0.320438 | 0.91014027     | 0.047449206 |
| 3733.704 | 3500.381 | 3489.69  | -0.06158 | 1.00576E-13    | 0.697416669 |
| 1543.872 | 1676.801 | 1846.497 | -0.18335 | 6.62105E-05    | 0.255474802 |
| 1132.887 | 1096.191 | 1435.698 | 0.007816 | 0.365690431    | 0.984451848 |
| 2373.881 | 2512.879 | 3025.446 | 0.184628 | 0.577190434    | 0.336932642 |
| 2105.848 | 2175.661 | 1774.188 | 0.216343 | 2.22109E-08    | 0.420331471 |
| 4953.255 | 4821.384 | 4754.571 | 0.094697 | 0.179898822    | 0.477876695 |
| 2239.865 | 2282.493 | 2391.433 | 0.22272  | 0.767527949    | 0.202680028 |
| 2025.438 | 1910.903 | 2049.8   | -0.14947 | 0.070750961    | 0.181864152 |
| 501.2222 | 504.4338 | 492.5388 | 0.01332  | 0.00756732     | 0.969186214 |
| 7348.579 | 7039.778 | 6934.318 | 0.086783 | 0.50823828     | 0.492537442 |
| 70.5821  | 93.82655 | 83.83639 | 0.238301 | 0.554725555 NA |             |
| 1440.232 | 1509.586 | 1898.894 | -0.29116 | 0.613137272    | 0.080369062 |
| 134.9101 | 152.352  | 137.2821 | 0.03576  | 0.0053461      | 0.928448576 |
| 2343.504 | 2299.215 | 2523.475 | -0.22075 | 0.621093622    | 0.102132739 |
| 293.0497 | 311.2069 | 273.5162 | 0.20835  | 0.099575114    | 0.56311517  |
| 262.6726 | 261.9712 | 287.1396 | -0.44505 | 0.842190796    | 0.029788115 |
| 18377.25 | 19337.56 | 19535.98 | 0.128505 | 0.583613744    | 0.306201671 |
| 1399.134 | 1413.901 | 1731.221 | -0.37319 | 0.917774343    | 0.013575411 |
| 812.1408 | 769.1919 | 925.3442 | -0.18506 | 0.077927263    | 0.407575574 |

|          |          |          |          |             |             |
|----------|----------|----------|----------|-------------|-------------|
| 175.1151 | 141.2043 | 165.5769 | 0.10515  | 0.960823113 | 0.759033711 |
| 582.5257 | 598.2604 | 756.6234 | -0.51588 | 0.835449534 | 0.000775343 |
| 23.22955 | 7.431806 | 6.287729 | -0.78934 | 0.200422675 | 0.229480039 |
| 569.124  | 536.948  | 734.6164 | -0.88951 | 0.296861073 | 2.55912E-09 |
| 581.6322 | 659.5728 | 712.6093 | -0.32165 | 0.873978289 | 0.060855027 |
| 587.8863 | 563.8883 | 582.6629 | -0.73785 | 0.961125122 | 8.75469E-05 |
| 79596.95 | 73564.66 | 69660.71 | 0.031841 | 0.218682865 | 0.841212475 |
| 416.345  | 473.7776 | 479.9633 | 0.47945  | 0.27470085  | 0.040331036 |
| 216.2135 | 334.4313 | 316.4824 | -0.24528 | 0.46017679  | 0.361564535 |
| 10487.25 | 10676.72 | 11446.81 | 0.342666 | 0.264355919 | 0.000164663 |
| 4636.976 | 4420.996 | 4622.529 | -0.00112 | 0.361731257 | 0.998953832 |
| 72.36898 | 68.74421 | 127.8505 | 0.149487 | 0.812875146 | 0.751258336 |
| 1785.995 | 1798.497 | 2004.738 | -0.1613  | 0.195740155 | 0.389507343 |
| 41.99188 | 45.51981 | 58.68547 | -0.36807 | 0.345374681 | NA          |
| 186.7298 | 212.7354 | 254.653  | -0.289   | 0.848681983 | 0.218832902 |
| 3715.835 | 3727.98  | 4037.77  | 0.177371 | 0.582558658 | 0.087007219 |
| 2617.792 | 2812.01  | 2594.736 | -0.03544 | 0.897759686 | 0.855100406 |
| 193.8774 | 229.457  | 236.8378 | 0.113884 | 0.038561058 | 0.73912962  |
| 10526.56 | 10334.86 | 11890.1  | 0.112403 | 0.783200259 | 0.394829397 |
| 296.6235 | 235.9598 | 293.4274 | -0.14687 | 0.243847797 | 0.636683257 |
| 8.934443 | 8.360782 | 2.09591  | -0.15577 | 0.864963799 | 0.905168779 |
| 752.2801 | 749.6834 | 926.3921 | 0.03346  | 0.577578732 | 0.907473183 |
| 244.8037 | 226.6701 | 207.4951 | -0.52846 | 0.189947746 | 0.162970478 |
| 1410.748 | 1266.194 | 1429.41  | 0.23319  | 0.62498123  | 0.205836834 |
| 7161.849 | 7040.707 | 7901.58  | -0.27725 | 0.759069408 | 0.063171194 |
| 14378.2  | 14491.09 | 14920.78 | 0.249301 | 0.119079209 | 0.015923242 |
| 163.5003 | 216.4514 | 189.6798 | -0.2726  | 0.309108798 | 0.535992604 |
| 266.2464 | 269.403  | 291.3315 | 0.013394 | 0.856763291 | 0.964974564 |
| 2372.095 | 2293.641 | 2686.956 | -0.11171 | 0.000169043 | 0.46008868  |
| 11681.78 | 11889.96 | 11776.92 | 0.170582 | 0.482562486 | 0.126656023 |
| 0        | 5.573855 | 5.239774 | -0.36315 | 0.848847805 | 0.742968787 |
| 687.0586 | 692.0869 | 717.8491 | -0.48897 | 5.68875E-08 | 0.017241442 |
| 1066.772 | 1149.143 | 1171.614 | 0.127229 | 0.867587609 | 0.488462858 |
| 30.3771  | 12.07668 | 18.86319 | -0.18398 | 0.310443697 | 0.819964665 |
| 1.786889 | 0        | 0        | #DIV/0!  | 0.853331381 | NA          |
| 12580.59 | 12533.74 | 13447.36 | 0.032571 | 0.779325825 | 0.840173173 |
| 424.386  | 379.0221 | 493.5868 | -0.5717  | 6.11612E-05 | 0.017610586 |
| 4628.041 | 4527.828 | 4404.554 | -0.06661 | 0.775670478 | 0.640605635 |
| 51765.27 | 50435.95 | 50967.29 | -0.10383 | 0.941323092 | 0.44710318  |
| 419.0254 | 413.3942 | 442.237  | -0.79069 | 1.16423E-14 | 1.25565E-11 |
| 1281.199 | 1265.265 | 1477.616 | -0.09096 | 0.981023664 | 0.697416669 |
| 532.4928 | 625.2007 | 569.0395 | -0.00894 | 0.16816951  | 0.975406172 |
| 195.6643 | 165.3577 | 142.5219 | -0.17242 | 0.666493976 | 0.718440886 |
| 58.07388 | 48.30674 | 76.50071 | 0.282298 | 0.772432927 | 0.521104798 |
| 715.6489 | 731.1039 | 676.9789 | 0.391082 | 0.313396084 | 0.036487394 |
| 1039.969 | 1044.169 | 937.9196 | -0.11517 | 0.585762809 | 0.611282744 |
| 28.59022 | 19.50849 | 27.24683 | -0.15851 | 0.695990097 | 0.835596295 |
| 7.147554 | 14.86361 | 8.383639 | -0.13633 | 0.701216566 | 0.919616146 |
| 1663.593 | 1732.54  | 2003.69  | -0.47084 | 0.901380807 | 0.000192079 |
| 377.0335 | 335.3602 | 435.9492 | -0.34137 | 0.139081773 | 0.071525598 |
| 3343.268 | 3372.182 | 3501.217 | -0.23167 | 0.626788166 | 0.055974476 |
| 1584.97  | 1423.191 | 1091.969 | 0.161438 | 0.019988247 | 0.519913808 |
| 6216.585 | 5938.013 | 5597.127 | 0.153836 | 0.708999466 | 0.283557823 |
| 3372.752 | 3562.622 | 3396.422 | -0.57975 | 0.292435632 | 1.78403E-15 |

|          |          |          |          |                |             |
|----------|----------|----------|----------|----------------|-------------|
| 187.6233 | 184.8662 | 171.8646 | -1.65803 | 0.000902992    | 3.46599E-18 |
| 1783.315 | 1852.378 | 2063.423 | -0.39159 | 3.02032E-05    | 0.004542562 |
| 1008.699 | 912.2542 | 1045.859 | -0.10711 | 0.017639055    | 0.654628753 |
| 169.7544 | 176.5054 | 167.6728 | 0.300278 | 0.193158044    | 0.290714074 |
| 630.7716 | 607.5501 | 492.5388 | -0.05518 | 0.012324166    | 0.873196229 |
| 256.4185 | 263.8291 | 291.3315 | 0.263003 | 0.854862911    | 0.195644716 |
| 201.025  | 192.298  | 207.4951 | 0.090165 | 0.42694305     | 0.840777068 |
| 1168.625 | 1174.225 | 1218.772 | 0.166904 | 0.29215357     | 0.379845684 |
| 27.69677 | 34.3721  | 34.58251 | -0.25637 | 0.572336545 NA |             |
| 3817.687 | 3849.676 | 4095.408 | 0.486927 | 0.189947746    | 1.11988E-07 |
| 17283.68 | 16916.65 | 18743.72 | 0.086322 | 0.60948547     | 0.628282957 |
| 2506.111 | 2410.692 | 2910.171 | -0.02825 | 0.659640784    | 0.91372954  |
| 2134.438 | 2272.275 | 2433.351 | -0.43192 | 0.429975868    | 0.000123311 |
| 1946.815 | 2192.383 | 2019.409 | -0.15989 | 0.000302523    | 0.543070132 |
| 345.7629 | 321.4256 | 381.4556 | 0.097841 | 0.68563527     | 0.694987858 |
| 62.5411  | 45.51981 | 46.11002 | 0.227621 | 0.621093622 NA |             |
| 720.1161 | 763.6181 | 964.1185 | -0.30425 | 0.356652725    | 0.176171477 |
| 145.6314 | 152.352  | 139.378  | 0.674727 | 0.831439424    | 0.062400751 |
| 1848.536 | 1772.486 | 1869.552 | -0.25489 | 0.827268091    | 0.076189989 |
| 126.8691 | 91.03962 | 100.6037 | -0.0235  | 0.976681492    | 0.984456511 |
| 305.5579 | 367.8744 | 233.6939 | 0.409529 | 0.06089504     | 0.382319285 |
| 629.8782 | 644.7092 | 473.6756 | -0.01307 | 0.95250253     | 0.971658868 |
| 47.35255 | 60.38342 | 50.30183 | 0.411496 | 0.399514053 NA |             |
| 3.573777 | 1.857952 | 4.19182  | 0.155398 | 0.405459844 NA |             |
| 47.35255 | 51.09367 | 52.39774 | 0.029941 | 0.30979442     | 0.951184679 |
| 393.1155 | 354.8687 | 328.0099 | -0.23444 | 2.17828E-05    | 0.394829397 |
| 2647.275 | 2623.428 | 2860.917 | -0.45284 | 0.884585407    | 9.27394E-06 |
| 22334.32 | 21785.41 | 23289.75 | -0.20805 | 0.800609294    | 0.069345614 |
| 1563.527 | 1649.861 | 1730.174 | 0.152172 | 0.936346196    | 0.313958096 |
| 3778.376 | 3354.531 | 2747.738 | 0.290028 | 0.92288341     | 0.548866742 |
| 4543.164 | 4391.268 | 4565.939 | -0.19323 | 0.043196135    | 0.117751922 |
| 2251.48  | 2289.925 | 2538.147 | -0.39261 | 0.008454108    | 0.000306119 |
| 379.7138 | 343.721  | 632.9648 | -0.08917 | 0.878081019    | 0.896421455 |
| 3731.917 | 3671.312 | 3679.37  | -0.11983 | 0.358629856    | 0.27042216  |
| 19.65577 | 11.14771 | 12.57546 | -1.31203 | 0.320833466    | 0.014483576 |
| 1455.421 | 1571.827 | 1677.776 | 0.042978 | 0.000288624    | 0.861226913 |
| 658.4684 | 585.2547 | 636.1086 | 0.152066 | 0.948234757    | 0.612263058 |
| 4649.484 | 4764.717 | 5277.501 | 0.155766 | 0.896968012    | 0.365253762 |
| 38.4181  | 22.29542 | 38.77433 | 0.376965 | 0.990604058 NA |             |
| 536.0666 | 556.4565 | 429.6615 | 0.074837 | 0.000701205    | 0.765988241 |
| 11102.83 | 11308.42 | 11605.05 | 0.426488 | 0.060383326    | 1.33287E-07 |
| 3756.933 | 3814.374 | 3856.474 | -0.1345  | 0.065480816    | 0.236801834 |
| 25077.19 | 25333.17 | 26807.73 | 0.257265 | 0.193158044    | 0.046834479 |
| 405.6237 | 311.2069 | 309.1467 | 0.292666 | 0.199696516    | 0.215394284 |
| 2884.038 | 2477.578 | 2539.195 | 0.110556 | 0.148209117    | 0.505302546 |
| 3.573777 | 7.431806 | 14.67137 | -0.1902  | 0.036478363    | 0.832624087 |
| 34.84433 | 31.58518 | 27.24683 | -0.17769 | 0.835449534    | 0.764338813 |
| 1310.683 | 1295.921 | 1301.56  | -0.06047 | 0.09473638     | 0.712929046 |
| 1488.478 | 1869.099 | 1739.605 | -0.43978 | 0.669696898    | 0.001362953 |
| 745.1325 | 834.2202 | 671.7391 | -0.0266  | 0.777280242    | 0.923725803 |
| 499.4353 | 612.195  | 541.7927 | -0.21418 | 5.71158E-06    | 0.293216205 |
| 413.6647 | 507.2208 | 581.615  | 0.092591 | 0.871252597    | 0.765179484 |
| 2817.923 | 2692.172 | 2825.286 | -0.13519 | 0.039854593    | 0.231047495 |
| 5818.109 | 5754.076 | 6126.344 | -0.05797 | 0.145043473    | 0.73912962  |

|          |          |          |          |                |             |
|----------|----------|----------|----------|----------------|-------------|
| 2505.218 | 2525.885 | 2766.601 | -0.02023 | 0.890248597    | 0.912679298 |
| 5080.124 | 5088     | 6213.325 | -0.04011 | 0.307232061    | 0.860333535 |
| 2166.602 | 2230.471 | 2590.544 | 0.010901 | 0.637486498    | 0.965436319 |
| 39.31155 | 19.50849 | 39.82229 | 0.384755 | 0.603004299    | 0.753881265 |
| 184.943  | 129.1276 | 199.1114 | -0.75186 | 0.018359753    | 0.000429882 |
| 311.812  | 247.1076 | 318.5783 | -0.30206 | 0.44839829     | 0.217256598 |
| 19068.78 | 19760.24 | 19785.39 | 0.388508 | 0.40568693     | 2.89678E-05 |
| 14918.73 | 14744.7  | 13986.01 | 0.257479 | 0.136870362    | 0.024833343 |
| 1107.871 | 958.703  | 1125.504 | 0.36128  | 0.951118826    | 0.138699579 |
| 578.0584 | 668.8625 | 664.4034 | 0.178627 | 0.100000333    | 0.552800466 |
| 1239.207 | 1218.816 | 1099.305 | 0.145252 | 0.229707909    | 0.359566588 |
| 5674.264 | 5859.979 | 6087.57  | 0.07791  | 0.603849055    | 0.575540189 |
| 12834.33 | 12607.13 | 13132.97 | -0.24653 | 0.045913153    | 0.02329362  |
| 397.5827 | 411.5363 | 450.6206 | 0.154355 | 0.716063981    | 0.59853578  |
| 11475.4  | 10915.47 | 10762.5  | -0.32815 | 0.865564724    | 0.101229705 |
| 855.0262 | 829.5754 | 944.2074 | 0.37592  | 0.335983122    | 0.007452176 |
| 5722.51  | 5712.272 | 5296.364 | 0.216525 | 0.724149904    | 0.078871289 |
| 223.3611 | 233.1729 | 263.0367 | -0.59382 | 1.9456E-18     | 0.00064005  |
| 42304.59 | 42920.54 | 36314.78 | -0.05726 | 0.653304895    | 0.798292995 |
| 392.222  | 441.2635 | 341.6333 | 0.032943 | 0.664286641    | 0.930336535 |
| 2769.677 | 2667.089 | 2850.437 | 0.011105 | 0.682715357    | 0.952666818 |
| 1099.83  | 1223.461 | 1304.704 | -0.06325 | 0.001404555    | 0.765870575 |
| 4070.532 | 3945.36  | 3539.992 | -0.24771 | 0.006229103    | 0.118990473 |
| 2909.948 | 2629.001 | 2838.91  | 0.28648  | 0.529339672    | 0.03394343  |
| 317.1727 | 258.2553 | 227.4062 | 0.049871 | 0.729364673    | 0.87466351  |
| 859.4934 | 861.1605 | 903.3371 | -0.13528 | 0.394915233    | 0.42381604  |
| 4320.696 | 4083.777 | 4298.711 | -0.2247  | 0.002515233    | 0.252406149 |
| 287.6891 | 265.6871 | 338.4894 | -0.41664 | 0.720090812    | 0.176171477 |
| 5535.781 | 5537.625 | 5639.045 | 0.273031 | 0.29215357     | 0.042179555 |
| 21.44266 | 32.51415 | 25.15092 | -0.09097 | 0.657109304    | 0.929846474 |
| 815.7146 | 797.0612 | 755.5755 | -0.06566 | 0.001759401    | 0.835596295 |
| 7395.038 | 7020.27  | 6718.439 | 0.047245 | 0.811082292    | 0.775439768 |
| 4359.115 | 4530.615 | 5367.625 | -0.39287 | 0.923281561    | 0.003888622 |
| 1822.626 | 1789.207 | 1976.443 | 0.966717 | 0.000288624    | 1.47331E-16 |
| 381.5007 | 429.1868 | 447.4767 | -0.34221 | 0.02496009     | 0.069635315 |
| 162.6069 | 158.8549 | 172.9126 | -0.22496 | 0.641408722    | 0.519258549 |
| 5807.388 | 5388.988 | 5874.835 | -0.2608  | 0.758716249    | 0.04168446  |
| 60.75421 | 55.73855 | 58.68547 | -0.61139 | 0.040661421    | 0.139776747 |
| 421.7057 | 372.5193 | 316.4824 | -0.07481 | 0.439271214    | 0.851593116 |
| 1131.1   | 1144.498 | 980.8858 | 0.104802 | 0.000498713    | 0.680780346 |
| 589.6732 | 510.9367 | 484.1552 | 0.308956 | 0.175067813    | 0.149383412 |
| 3751.572 | 3920.278 | 4252.601 | -0.47609 | 0.814155137    | 1.97977E-06 |
| 6480.151 | 6262.226 | 6801.227 | -0.07279 | 2.50477E-06    | 0.634183341 |
| 1808.331 | 1772.486 | 1933.477 | -0.20336 | 0.249012381    | 0.237811367 |
| 2092.446 | 2137.573 | 2001.594 | -0.18465 | 0.80107822     | 0.328024792 |
| 52.71321 | 60.38342 | 49.25388 | 1.010937 | 0.79502649 NA  |             |
| 390.4351 | 362.3005 | 366.7842 | -0.04962 | 0.905906764    | 0.86814025  |
| 2595.456 | 2531.459 | 2933.226 | 0.030211 | 0.145286779    | 0.899731862 |
| 4301.934 | 4096.783 | 4581.659 | 0.070857 | 0.662776675    | 0.699983589 |
| 49.13943 | 54.80957 | 49.25388 | -0.62138 | 0.274043459    | 0.060462725 |
| 737.0915 | 844.439  | 727.2807 | -0.3917  | 5.32047E-05    | 0.026450935 |
| 961.346  | 1072.038 | 931.6319 | 0.120527 | 0.086711881    | 0.65282506  |
| 0        | 0.928976 | 0        | #DIV/0!  | 0.509152281 NA |             |
| 870.2147 | 879.74   | 818.4528 | 0.171966 | 0.469683278    | 0.257842956 |

|          |          |          |          |                |             |
|----------|----------|----------|----------|----------------|-------------|
| 531.5993 | 491.4282 | 463.1961 | 0.204524 | 0.003450987    | 0.381794066 |
| 0        | 0        | 0        | #NUM!    | 0.814031874 NA |             |
| 309.1317 | 354.8687 | 425.4697 | -0.27868 | 0.587282007    | 0.277654437 |
| 1701.118 | 1778.06  | 1829.729 | -0.06809 | 0.897759686    | 0.706703794 |
| 937.223  | 943.8394 | 1160.086 | -0.01348 | 0.310443697    | 0.956290296 |
| 571.8043 | 623.3427 | 518.7377 | 0.077393 | 0.392876266    | 0.795076358 |
| 3624.703 | 3870.113 | 3491.786 | 0.08758  | 0.730204291    | 0.562654945 |
| 1735.069 | 1742.759 | 1820.298 | 0.493793 | 0.310443697    | 9.79395E-06 |
| 5106.034 | 5225.489 | 5607.607 | -0.0379  | 0.515985444    | 0.841070222 |
| 5388.362 | 5302.594 | 4926.436 | -0.08557 | 0.189917625    | 0.553711578 |
| 840.731  | 910.3962 | 821.5966 | 0.091051 | 0.395079365    | 0.663320474 |
| 0        | 0        | 0        | #DIV/0!  | 0.992476114 NA |             |
| 1244.568 | 1374.884 | 1560.405 | -0.16576 | 0.817609984    | 0.4158179   |
| 737.985  | 693.9449 | 698.9859 | 0.013876 | 0.827035335    | 0.948353155 |
| 495.8616 | 435.6896 | 463.1961 | 0.377762 | 0.0477642      | 0.144365513 |
| 1108.764 | 1074.825 | 1321.471 | 0.010054 | 0.651961753    | 0.975879427 |
| 926.5017 | 940.1235 | 793.3019 | 0.063838 | 0.335264059    | 0.872630949 |
| 58.07388 | 80.82089 | 90.12412 | -0.23579 | 0.106548765    | 0.609543168 |
| 711.1816 | 678.1523 | 601.5261 | 0.123566 | 0.735300868    | 0.599924988 |
| 7377.169 | 6914.367 | 7509.645 | -0.63323 | 2.40534E-08    | 7.36517E-16 |
| 2064.75  | 1897.897 | 1611.755 | 0.141137 | 0.897759686    | 0.535992604 |
| 733.5177 | 836.0782 | 675.9309 | -1.26102 | 0.306444733    | 0.006017374 |
| 26.80333 | 37.15903 | 30.39069 | 0.372765 | 0.577578732 NA |             |
| 178.6889 | 184.8662 | 203.3032 | 0.354387 | 0.203841572    | 0.307538923 |
| 1833.348 | 1778.989 | 1313.087 | 0.514702 | 0.365690431    | 0.009048373 |
| 422.5991 | 378.0931 | 367.8322 | -0.02932 | 0.632040487    | 0.928540862 |
| 46.4591  | 59.45445 | 81.74048 | -0.16539 | 0.585762809    | 0.742199342 |
| 5426.78  | 5160.46  | 5689.347 | -0.14907 | 0.285144055    | 0.230502062 |
| 1587.65  | 1434.339 | 1663.104 | 0.107258 | 0.306444733    | 0.547627123 |
| 11.61478 | 7.431806 | 5.239774 | 0.447317 | 0.779325825 NA |             |
| 118.8281 | 125.4117 | 145.6657 | -0.58759 | 0.000892317    | 0.053436877 |
| 2299.726 | 2112.491 | 2517.188 | 0.109176 | 0.787792061    | 0.513503617 |
| 502.1157 | 565.7462 | 528.1693 | -0.38778 | 0.403965481    | 0.102175745 |
| 125.9756 | 115.193  | 118.4189 | -0.62566 | 0.682715357    | 0.057548545 |
| 3225.334 | 3296.006 | 3403.757 | 0.076255 | 0.817609984    | 0.583053599 |
| 406.5171 | 443.1214 | 444.3329 | -0.28698 | 0.685238785    | 0.208176931 |
| 655.7881 | 741.3227 | 823.6925 | -0.27893 | 0.394915233    | 0.096786584 |
| 600.3945 | 632.6325 | 682.2186 | -0.09696 | 0.43802737     | 0.6924902   |
| 33.05744 | 18.57952 | 38.77433 | 0.120819 | 0.804360442    | 0.868094937 |
| 1279.412 | 1316.359 | 1151.702 | 0.267903 | 0.988569159    | 0.190716353 |
| 40.20499 | 31.58518 | 61.82934 | -0.39003 | 0.973340554 NA |             |
| 2231.824 | 2101.343 | 1993.21  | 0.148459 | 0.258861617    | 0.354829766 |
| 1240.101 | 1251.33  | 1111.88  | 0.197637 | 0.263755993    | 0.273845028 |
| 2245.225 | 2242.547 | 2641.894 | 0.129183 | 0.314856356    | 0.659338327 |
| 911.3131 | 925.2599 | 897.0494 | 0.080169 | 0.007621754    | 0.690106308 |
| 9768.92  | 9404.951 | 9869.639 | 0.101411 | 0.034815958    | 0.335921009 |
| 3321.826 | 3222.617 | 3194.167 | 0.061149 | 0.926122159    | 0.676039277 |
| 1983.446 | 2012.161 | 2192.322 | -0.08534 | 0.864617666    | 0.583691606 |
| 2129.971 | 2136.644 | 2480.509 | 0.114925 | 0.657109304    | 0.602240104 |
| 3031.456 | 2959.717 | 3135.481 | 0.050103 | 0.470002734    | 0.745719365 |
| 17625.87 | 16661.18 | 17119.39 | -0.27663 | 0.6744135      | 0.011689383 |
| 6413.143 | 6197.197 | 7406.945 | -0.14713 | 0.606270396    | 0.351399771 |
| 1040.863 | 1065.535 | 1128.647 | -0.18167 | 0.626294604    | 0.146138686 |
| 14600.67 | 13803.65 | 15130.37 | 0.249394 | 0.331331472    | 0.074687558 |

|          |          |          |          |                |             |
|----------|----------|----------|----------|----------------|-------------|
| 2344.398 | 2322.439 | 2082.286 | 0.376441 | 0.935523245    | 0.030371149 |
| 1971.831 | 1813.361 | 1761.612 | 0.210945 | 0.55438266     | 0.224439117 |
| 0.893444 | 0.928976 | 1.047955 | -1.58993 | 0.582123698 NA |             |
| 3010.014 | 2760.916 | 3229.797 | -0.3705  | 0.351446149    | 0.004740829 |
| 3508.556 | 3364.75  | 3460.347 | -0.00236 | 0.39175021     | 0.993537704 |
| 1307.109 | 1321.004 | 1313.087 | 0.030526 | 0.134933146    | 0.884584155 |
| 1573.355 | 1436.197 | 1688.255 | -0.03414 | 0.981023664    | 0.889287206 |
| 3927.581 | 3815.303 | 4287.183 | 0.154698 | 0.826883467    | 0.238211044 |
| 530.7059 | 554.5985 | 559.6079 | -0.51896 | 0.000831429    | 0.000873642 |
| 146.5249 | 185.7952 | 164.5289 | -0.45278 | 0.654926306    | 0.045330931 |
| 429.7467 | 452.4112 | 553.3202 | 0.186722 | 0.060257212    | 0.474497273 |
| 1059.625 | 949.4132 | 970.4062 | 0.086341 | 0.901266975    | 0.647117771 |
| 608.4355 | 559.2434 | 498.8265 | 0.049182 | 0.374469996    | 0.847133587 |
| 0        | 1.857952 | 0        | #DIV/0!  | 0.522454877 NA |             |
| 431.5336 | 467.2748 | 486.2511 | 0.160083 | 0.787792061    | 0.609543168 |
| 20039.06 | 19451.82 | 22116.04 | 0.888502 | 0.028479181    | 2.3991E-17  |
| 68.79521 | 48.30674 | 60.78138 | 0.299528 | 0.321300373    | 0.502183544 |
| 1985.233 | 2006.588 | 1869.552 | 0.018045 | 0.130616009    | 0.941096477 |
| 404449.7 | 393264.2 | 379960.1 | -0.04415 | 0.894528942    | 0.812861677 |
| 10834.8  | 11109.62 | 10758.3  | -0.34818 | 0.31587804     | 0.001069433 |
| 1094.469 | 1074.825 | 1103.497 | 0.106997 | 0.465047544    | 0.467083166 |
| 764.7883 | 673.5074 | 634.0127 | 0.121921 | 0.01192228     | 0.606332686 |
| 4843.361 | 4671.819 | 4853.079 | -1.00003 | 0.120176384    | 2.23384E-22 |
| 21932.27 | 21815.14 | 19586.28 | -0.04458 | 0.728952588    | 0.765789524 |
| 0.893444 | 0.928976 | 3.143865 | #DIV/0!  | 0.802471571 NA |             |
| 2034.373 | 1966.642 | 1816.106 | 0.295168 | 0.811082292    | 0.047449206 |
| 334.1482 | 397.6016 | 366.7842 | 0.095846 | 0.541271961    | 0.752110266 |
| 1713.626 | 1713.96  | 1636.906 | 0.10537  | 0.752287766    | 0.55088846  |
| 483.3533 | 541.5929 | 661.2595 | -0.08232 | 0.141936131    | 0.811387384 |
| 2210.381 | 2355.883 | 2157.739 | -0.03567 | 0.564427849    | 0.872213394 |
| 3791.777 | 4152.522 | 4182.388 | 0.059687 | 0.501025279    | 0.680271881 |
| 46404.6  | 45571.83 | 45071.49 | -0.11786 | 0.28025041     | 0.477783776 |
| 753.1735 | 625.2007 | 698.9859 | 0.227687 | 0.948755315    | 0.227088314 |
| 176.0085 | 171.8605 | 219.0226 | -0.31941 | 0.009055285    | 0.33000998  |
| 5468.772 | 5150.242 | 5245.014 | -0.68135 | 0.03049807     | 1.28113E-16 |
| 447.6156 | 444.0504 | 495.6827 | -0.11262 | 0.973340554    | 0.620526274 |
| 279.6481 | 282.4086 | 254.653  | -0.17248 | 0.363948776    | 0.553486024 |
| 898.8049 | 920.615  | 1012.324 | 0.068428 | 0.120812072    | 0.826468162 |
| 1476.863 | 1177.012 | 1515.343 | -0.17187 | 0.077927263    | 0.364490432 |
| 5220.395 | 4715.481 | 5201     | 0.078666 | 0.511831737    | 0.620526274 |
| 730.8374 | 733.8909 | 690.6023 | 0.115213 | 0.747302666    | 0.566742383 |
| 1569.782 | 1702.813 | 1832.873 | -0.21409 | 0.813154117    | 0.387451456 |
| 5892.265 | 5729.922 | 6024.693 | -0.02872 | 0.211501936    | 0.848456292 |
| 516.4108 | 525.8003 | 432.8054 | -0.01307 | 0.91441696     | 0.974691849 |
| 6195.142 | 6278.018 | 6645.082 | -0.00654 | 0.406883355    | 0.967502683 |
| 5341.01  | 5351.829 | 5730.217 | 0.277562 | 0.978804446    | 0.083378385 |
| 7935.572 | 7756.948 | 8273.604 | 0.418415 | 0.140032454    | 0.000123311 |
| 3033.243 | 3177.097 | 2990.863 | -0.78218 | 1.52205E-34    | 3.02863E-27 |
| 168.861  | 212.7354 | 127.8505 | -0.01887 | 0.000701205    | 0.977355784 |
| 1639.47  | 1564.395 | 1990.066 | -0.47862 | 0.338642963    | 0.00037975  |
| 1103.404 | 1072.967 | 870.8505 | 0.128727 | 0.083426433    | 0.593714049 |
| 312.7055 | 306.562  | 420.2299 | -0.32936 | 0.395100931    | 0.168886427 |
| 4175.958 | 4248.206 | 4703.222 | -0.16475 | 0.734144448    | 0.229480039 |
| 1014.953 | 1031.163 | 1125.504 | -0.22847 | 0.535948266    | 0.103471246 |



|          |          |          |          |                |             |
|----------|----------|----------|----------|----------------|-------------|
| 353.8039 | 308.42   | 334.2976 | -0.17653 | 0.02453229     | 0.468420234 |
| 36524    | 36490.17 | 34388.64 | -0.03334 | 0.858353901    | 0.805419251 |
| 1614.454 | 1477.071 | 1416.835 | -0.30565 | 0.000678572    | 0.006064448 |
| 5881.544 | 5499.537 | 5568.832 | 0.019876 | 0.622402254    | 0.896421455 |
| 1306.216 | 1317.288 | 1380.157 | 0.382097 | 0.134933146    | 0.000106385 |
| 2124.61  | 2107.846 | 1794.099 | 0.159396 | 0.99759924     | 0.351487828 |
| 52650.67 | 52564.24 | 47837.04 | -0.11084 | 0.759261525    | 0.495076977 |
| 743.3456 | 724.6011 | 791.2059 | 0.127016 | 0.600467264    | 0.545985077 |
| 496.755  | 592.6865 | 457.9563 | 0.156707 | 0.284902942    | 0.546682742 |
| 1349.101 | 1430.623 | 1453.513 | 0.241333 | 0.16272914     | 0.080270076 |
| 41897.18 | 40368.64 | 41215.02 | -0.19403 | 0.494488338    | 0.060851524 |
| 8856.713 | 8609.747 | 8523.017 | 0.233473 | 1.10762E-25    | 0.141040456 |
| 58.96732 | 84.53679 | 67.06911 | -0.05338 | 0.896968012    | 0.94960537  |
| 351.1236 | 317.7097 | 388.7913 | -0.34013 | 0.770051929    | 0.120090071 |
| 150.9921 | 170.9315 | 187.5839 | -0.45793 | 0.084787806    | 0.080567578 |
| 7.147554 | 13.00566 | 0        | 0.460338 | 0.43839941 NA  |             |
| 60.75421 | 38.08801 | 54.49365 | 0.073795 | 0.444002938 NA |             |
| 4972.911 | 4960.731 | 4806.969 | -0.31687 | 0.944992229    | 0.000195764 |
| 153.6724 | 133.7725 | 144.6178 | -0.17725 | 0.619821934    | 0.542805648 |
| 3219.973 | 2960.646 | 2982.48  | -0.01298 | 0.815150251    | 0.94960537  |
| 3476.392 | 3507.812 | 3555.711 | 0.438702 | 0.946696226    | 1.05479E-06 |
| 1794.93  | 1776.202 | 1603.371 | 0.205481 | 0.14394509     | 0.225879379 |
| 915.7804 | 958.703  | 886.5698 | -0.09219 | 0.111397413    | 0.66509742  |
| 1995.061 | 2066.042 | 2046.656 | 0.397456 | 0.595320624    | 0.000230052 |
| 897.018  | 800.7771 | 793.3019 | -0.05621 | 0.825633601    | 0.797601985 |
| 1165.051 | 1151.001 | 1058.434 | 0.091114 | 0.357373649    | 0.778199039 |
| 25.01644 | 46.44879 | 40.87024 | 0.654966 | 0.828016939    | 0.254420279 |
| 821.0753 | 854.6577 | 921.1524 | -0.09689 | 0.011540931    | 0.626829627 |
| 269.8202 | 350.2239 | 311.2426 | -0.02774 | 0.469192599    | 0.920188536 |
| 10176.33 | 10026.44 | 10348.55 | 0.002121 | 0.045826503    | 0.990142758 |
| 1461.675 | 1475.214 | 1563.549 | -0.13108 | 0.988569159    | 0.493837083 |
| 3166.366 | 3152.944 | 3350.312 | -0.40736 | 0.279564109    | 7.82735E-06 |
| 716.5423 | 717.1693 | 792.2539 | -0.00874 | 0.504924333    | 0.975879427 |
| 570.0174 | 495.1441 | 465.292  | 0.191547 | 0.92288341     | 0.471932964 |
| 5660.863 | 5658.391 | 6304.497 | -0.02588 | 0.620659412    | 0.913119202 |
| 2842.046 | 3073.981 | 3153.296 | 0.061749 | 0.49990935     | 0.751029502 |
| 1045.33  | 967.0638 | 990.3174 | 0.317872 | 0.265502165    | 0.015466264 |
| 41.09844 | 26.01132 | 26.19887 | -0.14637 | 0.857865109 NA |             |
| 3692.605 | 3729.838 | 3696.137 | -0.13496 | 0.036478363    | 0.160483163 |
| 1593.011 | 1646.145 | 1575.076 | 0.131181 | 0.798439173    | 0.361564535 |
| 73.26243 | 50.16469 | 69.16502 | -0.40868 | 0.025915262    | 0.315833346 |
| 2635.661 | 2398.615 | 2465.838 | -0.18375 | 1.02131E-12    | 0.13467359  |
| 105.4264 | 124.4828 | 124.7066 | 0.102711 | 0.37757303     | 0.847133587 |
| 7091.267 | 7011.909 | 8119.555 | 0.857992 | 0.948234757    | 6.13477E-15 |
| 130.4429 | 129.1276 | 96.41185 | -0.01126 | 0.507065266    | 0.99232704  |
| 1269.584 | 1197.45  | 1145.415 | 0.219652 | 0.482263779    | 0.120651904 |
| 1131.1   | 1085.973 | 1103.497 | 0.02263  | 0.88874568     | 0.918453677 |
| 33136.95 | 31540.59 | 32137.63 | 0.289791 | 0.652050398    | 4.19262E-05 |
| 1863.725 | 1681.446 | 1584.508 | 0.186623 | 0.6333028      | 0.361564535 |
| 4500.279 | 4556.626 | 5598.175 | -0.44444 | 0.298839192    | 0.008018267 |
| 1494.732 | 1484.503 | 1641.097 | -0.56269 | 0.572336545    | 1.79298E-05 |
| 53821.08 | 50598.52 | 46258.82 | 0.12109  | 0.063499532    | 0.558104763 |
| 1286.56  | 1380.458 | 1630.618 | -0.5013  | 0.559171932    | 5.12674E-05 |
| 1229.379 | 1303.353 | 1094.065 | 0.074913 | 0.361706648    | 0.758793804 |

|          |          |          |          |                |             |
|----------|----------|----------|----------|----------------|-------------|
| 105261.1 | 102195.7 | 105232.5 | -0.14006 | 0.935100162    | 0.423533881 |
| 358.2711 | 379.9511 | 470.5317 | -0.1029  | 0.861070915    | 0.718323278 |
| 5356.198 | 5589.647 | 5150.698 | 0.181799 | 0.936346196    | 0.082377833 |
| 2135.332 | 2099.485 | 2278.254 | 0.153156 | 0.221789876    | 0.333065318 |
| 1326.765 | 1111.055 | 1191.525 | 0.091255 | 0.769710962    | 0.666213081 |
| 546.7879 | 516.5105 | 603.622  | 0.649588 | 0.187385025    | 0.000192079 |
| 484.2468 | 523.0134 | 588.9507 | 0.409859 | 0.867574132    | 0.098823212 |
| 14993.78 | 14249.56 | 15814.69 | -0.15769 | 0.654926306    | 0.361564535 |
| 641.493  | 625.2007 | 892.8576 | -0.16489 | 0.965403682    | 0.570860906 |
| 6076.314 | 5946.374 | 5951.336 | 0.038942 | 0.670951846    | 0.778166558 |
| 18.76233 | 23.22439 | 24.10296 | -0.13355 | 0.1202463 NA   |             |
| 176.902  | 234.1019 | 233.6939 | 0.166992 | 0.837998472    | 0.596499376 |
| 1318.724 | 1300.566 | 1389.588 | 0.041683 | 0.638519612    | 0.87057216  |
| 1090.895 | 1071.109 | 1172.662 | 0.067645 | 0.545771146    | 0.681228083 |
| 0        | 1.857952 | 0        | #DIV/0!  | 0.836333106 NA |             |
| 500.3288 | 526.7293 | 594.1904 | -0.35308 | 0.436758255    | 0.038329459 |
| 55.39354 | 56.66752 | 74.4048  | -0.07626 | 0.116786217    | 0.887223334 |
| 904.1656 | 902.0355 | 725.1848 | 0.143841 | 0.728166455    | 0.522228539 |
| 170.6479 | 92.89758 | 128.8985 | 0.304003 | 0.663061022    | 0.437636747 |
| 4337.672 | 3923.065 | 4213.827 | -0.40519 | 0.003867233    | 0.000226461 |
| 8825.442 | 9018.497 | 9944.044 | -0.07143 | 0.875368742    | 0.724404377 |
| 952.4116 | 921.544  | 911.7208 | 0.041781 | 0.003450987    | 0.846177331 |
| 1034.608 | 999.5779 | 938.9676 | 0.105566 | 0.049083937    | 0.593884478 |
| 7001.029 | 7284.099 | 9812.002 | -0.48534 | 0.081224331    | 0.001954689 |
| 246.5906 | 260.1132 | 238.9337 | -0.14307 | 0.759261525    | 0.72969638  |
| 5944.085 | 5881.346 | 5802.526 | 0.106601 | 0.97659978     | 0.401324593 |
| 114.3609 | 124.4828 | 97.45981 | -0.32963 | 0.572336545    | 0.290794331 |
| 1046.223 | 1085.044 | 1030.14  | 0.102212 | 0.809173332    | 0.629323036 |
| 0        | 0.928976 | 0        | -2.08851 | 0.998398411 NA |             |
| 2579.374 | 2545.394 | 3460.347 | -0.39014 | 0.386644751    | 0.024308063 |
| 3443.334 | 3113.927 | 2778.128 | 0.13103  | 0.617539326    | 0.476261394 |
| 1401.814 | 1273.626 | 1395.876 | -0.06018 | 0.652050398    | 0.728787361 |
| 4932.706 | 4840.893 | 4580.611 | 0.199543 | 0.910983119    | 0.036487394 |
| 45.56566 | 33.44313 | 39.82229 | -0.52849 | 0.188588777    | 0.266809788 |
| 396.6893 | 346.508  | 469.4838 | 0.131932 | 0.986125936    | 0.601858923 |
| 44967.94 | 44482.15 | 49865.89 | 0.349221 | 0.153154897    | 0.00185873  |
| 1015.846 | 986.5723 | 1085.681 | 0.067663 | 0.008324314    | 0.763161717 |
| 595.9273 | 693.9449 | 599.4302 | 0.050502 | 0.872688807    | 0.834319281 |
| 2180.897 | 2105.988 | 1920.901 | 0.249612 | 0.257821803    | 0.26890857  |
| 954.1985 | 1011.655 | 994.5092 | 0.291016 | 0.757469981    | 0.031567205 |
| 8243.81  | 8437.887 | 8117.459 | -0.22168 | 0.182512116    | 0.063993489 |
| 742.4522 | 864.8764 | 834.1721 | -0.0151  | 0.60948547     | 0.94960537  |
| 737.985  | 645.6382 | 763.9591 | -0.12811 | 0.358629856    | 0.49776547  |
| 173.3282 | 152.352  | 154.0494 | 0.363351 | 0.784844775    | 0.48379367  |
| 209.066  | 209.0195 | 254.653  | 0.054197 | 0.105557831    | 0.903239699 |
| 1387.519 | 1496.58  | 1609.659 | -0.09536 | 0.785492922    | 0.560116425 |
| 679.9111 | 570.3911 | 582.6629 | 0.195628 | 0.484084014    | 0.285602122 |
| 1870.872 | 1847.733 | 1808.77  | 0.125183 | 0.084784548    | 0.359873864 |
| 3071.661 | 2919.771 | 3074.7   | -0.05246 | 0.425091186    | 0.762128192 |
| 10917    | 10092.39 | 11828.27 | -0.14681 | 0.056527354    | 0.316669252 |
| 276.9677 | 313.9938 | 332.2017 | 0.066686 | 0.020880197    | 0.81253834  |
| 1.786889 | 3.715903 | 2.09591  | 0.528496 | 0.999122571 NA |             |
| 525.3452 | 536.019  | 569.0395 | -0.05944 | 0.928405436    | 0.824214258 |
| 2115.676 | 2173.803 | 2243.671 | 0.101436 | 0.660473408    | 0.575540189 |

|          |          |          |          |                |             |
|----------|----------|----------|----------|----------------|-------------|
| 68.79521 | 78.03396 | 76.50071 | -0.40856 | 0.58619972     | 0.268588059 |
| 10409.52 | 10457.48 | 9945.092 | 0.034875 | 0.935960933    | 0.818645356 |
| 811.2474 | 757.1152 | 759.7673 | 0.171447 | 0.472470204    | 0.336190405 |
| 91.13131 | 110.5481 | 104.7955 | -0.17923 | 0.006262634    | 0.723898526 |
| 594.1404 | 656.7859 | 617.2454 | 0.084287 | 0.764395772    | 0.723437511 |
| 633.452  | 598.2604 | 787.0141 | -0.20342 | 0.682713002    | 0.321405678 |
| 591.4601 | 665.1466 | 601.5261 | -0.16241 | 0.562820931    | 0.526905314 |
| 582.5257 | 537.877  | 457.9563 | 0.150051 | 0.434274199    | 0.604472877 |
| 612.0093 | 588.0417 | 540.7447 | -0.26897 | 0.036478363    | 0.198436131 |
| 1391.986 | 1442.699 | 1492.288 | 0.021009 | 0.856505841    | 0.921973417 |
| 726.3702 | 695.8028 | 753.4796 | -0.2229  | 0.048314421    | 0.164747869 |
| 622.7306 | 555.5275 | 664.4034 | 0.083765 | 0.398196147    | 0.813492611 |
| 191.1971 | 119.8379 | 144.6178 | 0.526686 | 0.767300341    | 0.322483845 |
| 11500.41 | 11340.01 | 12431.89 | -0.1351  | 0.918350023    | 0.274204666 |
| 12336.68 | 12137.07 | 13082.67 | 0.080063 | 0.681805164    | 0.631303895 |
| 1618.028 | 1518.875 | 1701.879 | -0.58718 | 0.019681562    | 2.89763E-07 |
| 401.1565 | 439.4055 | 428.6136 | -0.25718 | 0.967813477    | 0.23616229  |
| 1433.978 | 1471.498 | 1343.478 | -0.12453 | 0.388896402    | 0.344591494 |
| 11222.55 | 11364.16 | 12050.43 | 0.089156 | 0.335983122    | 0.656368654 |
| 867.5344 | 1013.513 | 816.3569 | 0.199263 | 0.038380374    | 0.317944832 |
| 2067.43  | 2277.849 | 2348.467 | -0.07473 | 0.179898822    | 0.765789524 |
| 8.934443 | 4.644879 | 1.047955 | 0.699022 | 0.478079371 NA |             |
| 3087.743 | 3256.989 | 3472.923 | -0.4967  | 0.020685631    | 1.44405E-05 |
| 173.3282 | 233.1729 | 208.543  | -0.25166 | 0.014990769    | 0.534193701 |
| 307.3448 | 358.5846 | 398.2229 | -0.28142 | 0.026312287    | 0.209997967 |
| 506.5829 | 458.914  | 461.1002 | -0.12721 | 0.037913264    | 0.612005134 |
| 3878.442 | 3847.818 | 3735.959 | -0.05918 | 0.166321504    | 0.739592868 |
| 1698.438 | 1774.344 | 1806.674 | 0.080897 | 0.981637588    | 0.710256666 |
| 578.0584 | 548.0957 | 599.4302 | -0.06199 | 0.368034878    | 0.785131021 |
| 814.8212 | 713.4534 | 796.4457 | -0.22705 | 0.324651337    | 0.172785623 |
| 703.1406 | 691.158  | 733.5684 | 0.431826 | 0.990604058    | 0.069341932 |
| 493.1812 | 482.1384 | 597.3343 | -0.21765 | 3.64832E-13    | 0.377059311 |
| 2884.038 | 3203.108 | 3542.088 | -0.47547 | 0.304135256    | 0.000891501 |
| 1124.846 | 1167.723 | 1154.846 | 0.117965 | 0.859974619    | 0.551771495 |
| 715.6489 | 730.1749 | 682.2186 | -0.03649 | 0.779325825    | 0.876563898 |
| 752.2801 | 907.6093 | 908.5769 | -0.14336 | 0.739082502    | 0.583053599 |
| 1232.953 | 1224.39  | 1186.285 | 0.193274 | 0.837529432    | 0.23618111  |
| 2599.923 | 2623.428 | 2690.1   | 0.171135 | 0.128775373    | 0.177628135 |
| 142.0576 | 143.0623 | 126.8025 | 0.483655 | 0.498379067    | 0.167165088 |
| 4846.042 | 4656.955 | 4709.509 | 0.092119 | 0.795376015    | 0.463488413 |
| 582.5257 | 594.5445 | 539.6968 | 0.035376 | 0.025100811    | 0.921848549 |
| 71.47554 | 52.02264 | 79.64457 | -0.4244  | 0.853477462    | 0.420106203 |
| 271.6071 | 212.7354 | 238.9337 | 0.081685 | 0.674403807    | 0.776926877 |
| 406.5171 | 434.7607 | 394.031  | -0.30018 | 0.948234757    | 0.236644531 |
| 1324.084 | 1324.719 | 1367.581 | -0.32463 | 0.922937786    | 0.013575411 |
| 50.03288 | 92.89758 | 62.87729 | 0.426277 | 0.88874568 NA  |             |
| 966.7067 | 999.5779 | 966.2144 | -0.12296 | 0.934554042    | 0.602858252 |
| 948.8378 | 1063.677 | 1035.379 | 0.027099 | 0.865150494    | 0.91372954  |
| 1115.018 | 1189.089 | 920.1044 | 0.171171 | 0.840870655    | 0.470895778 |
| 1591.224 | 1321.004 | 1345.574 | -0.17054 | 0.000791163    | 0.398655382 |
| 577.165  | 576.8939 | 525.0254 | 0.242284 | 0.720295497    | 0.353465216 |
| 154.5659 | 201.5877 | 229.5021 | -0.35146 | 0.735300868    | 0.17742588  |
| 20.54922 | 32.51415 | 22.00705 | 0.084228 | 0.780980494 NA |             |
| 3960.638 | 4021.536 | 3979.085 | 0.119318 | 0.914186189    | 0.29075107  |

|          |          |          |          |             |             |
|----------|----------|----------|----------|-------------|-------------|
| 4224.204 | 4213.834 | 4463.24  | -0.26144 | 0.651759792 | 0.013833369 |
| 1017.633 | 1160.291 | 1045.859 | 0.186656 | 0.134073214 | 0.251774974 |
| 92.9182  | 50.16469 | 68.11707 | 0.328506 | 0.567589507 | 0.477876695 |
| 58.96732 | 96.61348 | 72.30889 | -0.20514 | 0.883354954 | 0.682058194 |
| 8802.213 | 8021.706 | 8753.567 | -0.20642 | 0.243530103 | 0.184072788 |
| 113.4674 | 139.3464 | 165.5769 | -0.76973 | 0.417038094 | 0.005731554 |
| 2469.48  | 2462.715 | 2660.757 | -0.47717 | 0.302288037 | 2.9108E-06  |
| 1461.675 | 1373.026 | 1388.54  | 0.177299 | 0.563625743 | 0.193734178 |
| 45.56566 | 46.44879 | 64.9732  | -0.2869  | 0.863679003 | 0.55088846  |
| 551.2551 | 520.2264 | 533.409  | 0.053076 | 0.658199476 | 0.822050288 |
| 8015.088 | 8191.708 | 9133.975 | -0.14792 | 0.965666941 | 0.382141979 |
| 5196.272 | 5196.69  | 4915.956 | 0.084174 | 0.811082292 | 0.511081603 |
| 1154.33  | 1107.339 | 1032.236 | 0.008647 | 0.052819596 | 0.9717805   |
| 5507.19  | 5519.045 | 5518.53  | 0.03874  | 0.639085319 | 0.818645356 |
| 776.4031 | 806.351  | 732.5205 | 0.060181 | 0.072199218 | 0.782219628 |
| 7665.752 | 7823.834 | 8321.81  | -0.08427 | 0.0779973   | 0.686015779 |
| 607.5421 | 771.9789 | 728.3287 | -0.15051 | 0.722921305 | 0.474497273 |
| 1.786889 | 5.573855 | 2.09591  | 1.844073 | 0.196002323 | NA          |
| 69.68865 | 57.5965  | 62.87729 | -0.02728 | 0.215234152 | 0.961026715 |
| 82.19687 | 101.2584 | 120.5148 | -0.36095 | 0.817609984 | 0.251743462 |
| 762.108  | 826.7884 | 1072.058 | 0.113291 | 0.639638255 | 0.712929046 |
| 4380.557 | 4199.899 | 4322.814 | 0.208776 | 0.798409569 | 0.028545761 |
| 8247.384 | 8024.493 | 8982.021 | -0.17248 | 0.847232313 | 0.342128545 |
| 670.9766 | 644.7092 | 668.5952 | 0.031689 | 0.6333028   | 0.880061352 |
| 8.934443 | 7.431806 | 2.09591  | -0.50741 | 0.888901047 | NA          |
| 1992.381 | 1816.148 | 1553.069 | -0.31844 | 1.59339E-19 | 0.037131359 |
| 628.9848 | 687.4421 | 697.938  | 0.261131 | 0.185152106 | 0.250830779 |
| 8756.647 | 8606.96  | 8785.006 | -0.07431 | 0.846655864 | 0.646288352 |
| 136.697  | 173.7185 | 177.1044 | 0.368865 | 0.495326515 | 0.348855854 |
| 452.0828 | 472.8487 | 571.1354 | -0.76621 | 0.338642963 | 2.9108E-06  |
| 771.9358 | 819.3566 | 732.5205 | -0.16451 | 0.901132408 | 0.333065318 |
| 9299.861 | 9783.044 | 9259.729 | 0.028298 | 0.211120083 | 0.832900164 |
| 13391.84 | 13317.8  | 13713.54 | -0.05934 | 0.009017011 | 0.579998211 |
| 2753.595 | 2590.913 | 2779.176 | 0.049394 | 0.631766123 | 0.814086627 |
| 1301.748 | 1310.785 | 1476.568 | -0.10023 | 0.668494236 | 0.583053599 |
| 1374.117 | 1498.438 | 1689.303 | 0.182057 | 0.505612976 | 0.34519405  |
| 201.025  | 176.5054 | 160.3371 | 0.498858 | 0.004702869 | 0.049157122 |
| 338.6154 | 356.7267 | 455.8604 | -0.36931 | 0.408721528 | 0.079283616 |
| 168.861  | 164.4287 | 192.8237 | -0.65908 | 0.51752002  | 0.013398862 |
| 2423.914 | 2407.905 | 2636.655 | 0.344221 | 0.600467264 | 0.004337582 |
| 4366.262 | 4381.05  | 5076.294 | -0.41352 | 0.545771146 | 0.005408206 |
| 1624.282 | 1635.926 | 1713.406 | 0.056699 | 0.958214194 | 0.724404377 |
| 754.067  | 707.8795 | 726.2327 | 0.088354 | 0.183178382 | 0.748961137 |
| 1341.953 | 1476.142 | 1534.206 | -0.00331 | 0.446999299 | 0.996720771 |
| 1114.125 | 1083.186 | 1072.058 | -0.0365  | 0.002064668 | 0.872630949 |
| 767.4686 | 731.1039 | 695.842  | -0.21388 | 0.88849017  | 0.180455525 |
| 567.3371 | 526.7293 | 741.9521 | -0.71663 | 0.994127305 | 3.79149E-05 |
| 37124.4  | 37339.25 | 43754.21 | -0.16523 | 0.847380389 | 0.266001442 |
| 297.5169 | 324.2125 | 292.3794 | -0.06484 | 0.05061615  | 0.902408045 |
| 147.4183 | 180.2213 | 161.3851 | -0.05832 | 0.159614653 | 0.8721296   |
| 305.5579 | 349.2949 | 291.3315 | 0.140446 | 0.951538779 | 0.638102356 |
| 461.0172 | 427.3289 | 399.2708 | -0.37517 | 0.804360442 | 0.037530261 |
| 2411.406 | 2352.167 | 2285.59  | 0.007511 | 0.748299599 | 0.970425422 |
| 1630.536 | 1501.225 | 1535.254 | 0.075861 | 0.845528608 | 0.695745646 |

|          |          |          |          |                |             |
|----------|----------|----------|----------|----------------|-------------|
| 3050.219 | 2885.399 | 2910.171 | 0.482522 | 0.300372064    | 2.9108E-06  |
| 645.0668 | 594.5445 | 657.0677 | 0.31024  | 0.248671635    | 0.126956931 |
| 771.0424 | 855.5867 | 834.1721 | -0.08798 | 0.536580245    | 0.744396459 |
| 6137.962 | 6303.101 | 6716.343 | -0.26571 | 0.262179603    | 0.012142769 |
| 386.8614 | 496.0731 | 430.7095 | -0.12785 | 0.020898839    | 0.664227919 |
| 322.5334 | 323.2836 | 424.4217 | 0.074726 | 0.324105472    | 0.844024501 |
| 965.8132 | 915.0411 | 909.6248 | -0.42007 | 0.379871328    | 6.20365E-05 |
| 1060.518 | 1103.623 | 933.7278 | 0.229947 | 0.804687981    | 0.186593864 |
| 1912.864 | 1986.15  | 2022.553 | 0.209435 | 0.153105196    | 0.163756864 |
| 1079.281 | 1037.666 | 1054.243 | 0.12866  | 0.00628885     | 0.559214222 |
| 1380.371 | 1383.245 | 1349.766 | 0.469086 | 0.563223905    | 0.007395438 |
| 3985.655 | 4056.837 | 3660.506 | 0.079466 | 0.055914431    | 0.63553201  |
| 809.4605 | 680.0103 | 833.1241 | -0.06276 | 0.441155859    | 0.790835118 |
| 648.6405 | 531.3741 | 576.3752 | -0.1981  | 0.373435737    | 0.378650149 |
| 3124.375 | 2861.245 | 2636.655 | 0.13476  | 0.082467547    | 0.583053599 |
| 132.2298 | 155.139  | 136.2341 | 0.568892 | 0.837529432    | 0.232685912 |
| 913.1    | 879.74   | 954.6869 | -0.4798  | 0.596065856    | 0.000164663 |
| 1155.223 | 1142.64  | 1137.031 | 0.217386 | 0.049693405    | 0.117363139 |
| 417.2385 | 335.3602 | 455.8604 | 0.236143 | 0.469895855    | 0.316260034 |
| 2275.603 | 2394.9   | 2537.099 | 0.027407 | 0.170982117    | 0.875604624 |
| 1107.871 | 1088.76  | 968.3103 | 0.121555 | 0.50957694     | 0.685537269 |
| 170.6479 | 199.7298 | 200.1594 | -0.83277 | 0.054140788    | 2.54322E-07 |
| 1082.854 | 1055.316 | 1071.01  | 0.198665 | 0.119144516    | 0.33950184  |
| 1567.995 | 1547.674 | 1406.355 | 0.119921 | 0.832298202    | 0.56930697  |
| 14.29511 | 10.21873 | 11.5275  | -0.37642 | 0.811082292 NA |             |
| 48.24599 | 63.17035 | 73.35684 | 0.443288 | 0.200584155    | 0.356994802 |
| 10781.19 | 10482.56 | 10632.55 | -0.40855 | 7.8206E-06     | 3.40063E-05 |
| 656.6815 | 602.9053 | 629.8209 | -0.01513 | 0.732140966    | 0.937994709 |
| 2104.061 | 2062.326 | 1858.024 | -0.03829 | 0.686019125    | 0.896421455 |
| 191.1971 | 259.1842 | 211.6869 | -0.31377 | 7.06707E-06    | 0.23616229  |
| 479.7796 | 482.1384 | 654.9718 | 0.154382 | 0.26155741     | 0.652302842 |
| 16414.36 | 16246.86 | 14866.29 | 0.035616 | 0.426866268    | 0.841212475 |
| 1811.905 | 1917.406 | 2111.629 | -0.04786 | 0.173085065    | 0.820066816 |
| 363.6318 | 384.596  | 379.3597 | 0.198872 | 0.550217758    | 0.381727979 |
| 2740.194 | 2867.748 | 2727.827 | -0.03243 | 0.730204074    | 0.836321366 |
| 4322.483 | 4180.391 | 4556.508 | 0.122902 | 0.670044046    | 0.293133991 |
| 3640.785 | 3516.173 | 3766.35  | -0.01267 | 0.005009159    | 0.956290296 |
| 12.50822 | 28.79825 | 28.29478 | -0.28908 | 0.205662453    | 0.710256666 |
| 619.1569 | 736.6778 | 638.2045 | 0.173012 | 0.10338322     | 0.427953678 |
| 54.5001  | 51.09367 | 76.50071 | 0.162915 | 0.98409529 NA  |             |
| 4731.681 | 4746.137 | 4512.494 | 0.106873 | 0.680817293    | 0.447245603 |
| 1571.568 | 1563.466 | 1608.611 | -0.0206  | 0.776861758    | 0.92306642  |
| 4215.27  | 4396.842 | 4146.758 | -0.05568 | 0.642246351    | 0.775439768 |
| 1530.47  | 1454.776 | 1287.937 | -0.02253 | 0.181584456    | 0.921973417 |
| 109.0002 | 78.96294 | 121.5628 | -0.55252 | 0.810961861    | 0.050017331 |
| 3761.4   | 3828.309 | 3689.849 | 0.009424 | 0.837529432    | 0.951184679 |
| 19.65577 | 11.14771 | 19.91114 | -0.10628 | 0.835449534    | 0.941511899 |
| 1241.888 | 1105.481 | 1066.818 | -0.03476 | 0.735300868    | 0.897900971 |
| 4858.55  | 4800.018 | 4358.444 | 0.049019 | 0.935506037    | 0.756795912 |
| 126.8691 | 133.7725 | 140.426  | -0.08811 | 0.98843748     | 0.861336132 |
| 1924.479 | 2063.255 | 1918.805 | -0.108   | 0.017639055    | 0.383690121 |
| 536.0666 | 608.4791 | 549.1284 | -0.06009 | 0.918350023    | 0.822050288 |
| 9464.255 | 9152.269 | 8745.184 | 0.114492 | 0.488813245    | 0.245528705 |
| 64.32799 | 37.15903 | 48.20593 | 0.147918 | 0.614621507 NA |             |

|          |          |          |          |                |             |
|----------|----------|----------|----------|----------------|-------------|
| 1073.027 | 1085.044 | 945.2553 | 0.133633 | 0.002387022    | 0.423533881 |
| 48.24599 | 40.87493 | 35.63047 | -0.32072 | 0.07224611     | 0.563375937 |
| 9394.566 | 9518.286 | 9333.086 | -0.07515 | 0.544035793    | 0.55088846  |
| 2071.004 | 2000.085 | 2306.549 | -0.14903 | 0.002866239    | 0.300201673 |
| 3680.097 | 3638.798 | 3924.591 | -0.25446 | 0.362358207    | 0.065190198 |
| 314.4924 | 292.6274 | 455.8604 | -0.06411 | 0.001214989    | 0.918453677 |
| 1813.692 | 1741.83  | 1641.097 | 0.244398 | 0.910998143    | 0.109137955 |
| 1673.421 | 1631.281 | 1630.618 | 0.05898  | 0.528265463    | 0.713405771 |
| 3800.712 | 3747.488 | 3829.227 | 0.037584 | 0.999998226    | 0.818870327 |
| 1328.552 | 1252.259 | 1498.575 | 0.866632 | 0.470002734    | 6.76595E-09 |
| 1544.765 | 1635.926 | 1309.944 | 0.124366 | 0.98062117     | 0.483238043 |
| 3928.474 | 3857.107 | 3776.829 | -0.1698  | 0.986125936    | 0.26142392  |
| 229.6152 | 262.9001 | 359.4485 | 0.193225 | 0.053184762    | 0.681439344 |
| 830.0097 | 746.8965 | 1086.729 | -0.69744 | 0.648891486    | 5.71201E-05 |
| 1399.134 | 1376.742 | 1392.732 | -0.04187 | 0.159614653    | 0.821688803 |
| 307.3448 | 302.8461 | 333.2497 | 0.180467 | 0.49990935     | 0.502183544 |
| 1046.223 | 1159.362 | 995.5571 | 0.199179 | 0.469683278    | 0.367817075 |
| 6025.388 | 5316.528 | 5938.76  | 0.536443 | 0.035710242    | 0.000232021 |
| 1322.298 | 1184.444 | 1029.092 | 0.244928 | 0.812875146    | 0.266907481 |
| 1527.79  | 1746.474 | 1712.358 | -0.05287 | 0.02597477     | 0.797601985 |
| 1017.633 | 1126.848 | 1049.003 | 0.065725 | 0.502046091    | 0.764996976 |
| 1047.117 | 1062.748 | 1083.585 | 0.121828 | 0.967693355    | 0.519070487 |
| 2669.611 | 2652.226 | 2290.829 | 0.028906 | 0.603004299    | 0.889747395 |
| 300.1973 | 237.8178 | 343.7292 | -0.48369 | 0.844410461    | 0.013137961 |
| 4.467221 | 3.715903 | 7.335684 | 0.325647 | 0.874036182 NA |             |
| 744.2391 | 743.1806 | 617.2454 | -0.21652 | 0.00873722     | 0.301238876 |
| 6863.439 | 7191.201 | 7361.883 | -0.02737 | 0.984233953    | 0.902408045 |
| 1327.658 | 1272.697 | 1505.911 | -0.51498 | 0.740595411    | 0.000144734 |
| 722.7964 | 676.2944 | 687.4584 | 0.474591 | 0.002387022    | 0.000458578 |
| 1878.913 | 1916.477 | 1592.891 | 0.084409 | 0.761559926    | 0.638053826 |
| 3069.874 | 2995.018 | 2407.152 | 0.105979 | 0.115119266    | 0.675143077 |
| 2892.973 | 2699.604 | 2920.65  | -0.09486 | 0.001195876    | 0.542805648 |
| 190.3036 | 186.7241 | 250.4612 | 0.086984 | 0.87547961     | 0.838059844 |
| 4058.024 | 4089.351 | 4416.082 | 0.16891  | 0.925203985    | 0.131902958 |
| 13.40166 | 15.79259 | 6.287729 | 0.863748 | 0.804360442 NA |             |
| 1252.609 | 1180.728 | 1336.142 | 0.029015 | 0.998398411    | 0.923725803 |
| 650.4274 | 716.2403 | 648.6841 | 0.143122 | 0.907472172    | 0.523627087 |
| 473.5255 | 432.9027 | 582.6629 | -0.1509  | 0.536343685    | 0.536590083 |
| 1131.1   | 1006.081 | 816.3569 | 0.177125 | 0.985859213    | 0.497389249 |
| 870.2147 | 900.1775 | 913.8167 | -0.39038 | 0.008048268    | 0.002309437 |
| 683.4849 | 672.5785 | 803.7814 | -0.26121 | 0.074625654    | 0.319527914 |
| 25210.32 | 24831.52 | 25172.92 | -0.04084 | 0.394915233    | 0.807881031 |
| 33.95088 | 16.72156 | 38.77433 | 0.01672  | 0.900789434    | 0.986414682 |
| 20216.86 | 19174.99 | 20309.37 | 0.042922 | 0.743382516    | 0.786995178 |
| 397.5827 | 383.667  | 432.8054 | 0.127319 | 0.991136341    | 0.566180254 |
| 495.8616 | 501.6469 | 542.8406 | -0.58744 | 0.00112543     | 1.62112E-05 |
| 53.60666 | 77.10499 | 78.59662 | -0.52783 | 0.759069408    | 0.168910143 |
| 123.2953 | 115.193  | 105.8434 | -0.09127 | 0.504054705    | 0.818055883 |
| 4823.706 | 4610.507 | 4680.167 | 0.319098 | 0.936832996    | 0.090635263 |
| 284.1153 | 236.8888 | 289.2356 | -0.22049 | 0.156929518    | 0.427496625 |
| 17.86889 | 19.50849 | 26.19887 | 0.208817 | 0.98843748     | 0.81253834  |
| 1117.699 | 1079.47  | 976.694  | 0.147558 | 0.825797061    | 0.465657685 |
| 472.632  | 464.4879 | 462.1481 | -0.08718 | 0.108117004    | 0.773113821 |
| 1585.864 | 1608.057 | 1630.618 | -0.235   | 0.284203413    | 0.169935181 |

|          |          |          |          |             |             |
|----------|----------|----------|----------|-------------|-------------|
| 212.6397 | 216.4514 | 276.6601 | 0.464073 | 0.846759683 | 0.190817982 |
| 407.4106 | 393.8857 | 421.2779 | 0.04566  | 0.842190796 | 0.880639773 |
| 701.3537 | 797.0612 | 773.3907 | 0.089856 | 0.434940845 | 0.680886616 |
| 8243.81  | 7957.606 | 7939.306 | 0.10707  | 0.298839192 | 0.493206792 |
| 1294.601 | 1307.069 | 1216.676 | -0.07115 | 0.74446621  | 0.756795912 |
| 5199.846 | 5382.486 | 5292.172 | -0.07973 | 0.620421746 | 0.499176113 |
| 137.5904 | 113.335  | 167.6728 | -0.02617 | 0.811082292 | 0.941511899 |
| 3501.408 | 3583.06  | 4085.976 | -0.01831 | 0.390909657 | 0.935612856 |
| 90.23787 | 81.74987 | 75.45275 | 0.036726 | 0.303800805 | 0.923725803 |
| 0        | 2.786927 | 0        | -1.46492 | 0.509223684 | NA          |
| 322.5334 | 261.0422 | 276.6601 | -0.37117 | 0.621093622 | 0.092351218 |
| 556.6158 | 545.3088 | 506.1622 | -0.16763 | 0.713210135 | 0.368584102 |
| 4225.098 | 4088.422 | 3601.821 | 0.176176 | 0.72031406  | 0.338698753 |
| 2694.628 | 2977.367 | 2804.327 | 0.020226 | 0.827268091 | 0.912679298 |
| 1291.027 | 1376.742 | 1360.245 | -0.47417 | 0.023293079 | 7.44306E-05 |
| 4099.122 | 4287.223 | 4547.076 | 0.059606 | 0.328476882 | 0.703889775 |
| 333.2547 | 367.8744 | 397.1749 | -0.12095 | 0.157741898 | 0.681950827 |
| 96.49198 | 81.74987 | 83.83639 | 0.185482 | 0.603004299 | 0.708596546 |
| 955.9854 | 833.2913 | 955.7349 | 0.231394 | 0.956452433 | 0.163200347 |
| 1358.929 | 1160.291 | 1339.286 | -1.18668 | 7.0339E-18  | 2.98532E-19 |
| 235.8693 | 300.9881 | 233.6939 | 0.135517 | 0.970011305 | 0.656489824 |
| 5.360666 | 5.573855 | 11.5275  | -0.52399 | NA          | NA          |
| 219.7873 | 256.3973 | 265.1326 | -0.16517 | 0.795057685 | 0.684679019 |
| 1802.971 | 1591.335 | 1728.078 | -0.33848 | 0.003481985 | 0.00133704  |
| 1740.429 | 1533.739 | 1665.2   | 0.28322  | 0.431874361 | 0.017912978 |
| 8.934443 | 4.644879 | 6.287729 | 0.455617 | 0.769573539 | NA          |
| 1413.429 | 1285.702 | 1119.216 | 0.116075 | 0.295905234 | 0.588622174 |
| 620.9438 | 562.9593 | 536.5529 | 0.223068 | 0.581539609 | 0.31017583  |
| 1916.438 | 1896.04  | 1725.982 | 0.120407 | 0.995598118 | 0.437989627 |
| 2559.718 | 2681.024 | 2292.925 | 0.337007 | 0.059513177 | 0.051438409 |
| 265.3529 | 248.9655 | 212.7348 | 0.076308 | 0.897631797 | 0.832900164 |
| 239.4431 | 284.2666 | 237.8858 | -0.05964 | 0.056337167 | 0.878767667 |
| 1894.102 | 1971.287 | 1818.202 | 0.050519 | 0.497122222 | 0.811374268 |
| 4122.352 | 3976.945 | 3648.979 | 0.051128 | 0.564427849 | 0.744172227 |
| 583.4191 | 568.5332 | 714.7052 | -0.63701 | 0.924284267 | 0.000876631 |
| 6066.487 | 5610.085 | 5739.649 | 0.190991 | 0.517228307 | 0.24662663  |
| 133.1232 | 173.7185 | 134.1382 | 0.195677 | 0.986125936 | 0.690294956 |
| 1164.158 | 1196.521 | 1195.717 | -0.20755 | 0.847983366 | 0.155780712 |
| 178.6889 | 154.21   | 193.8717 | -0.09585 | 0.572336545 | 0.82871401  |
| 2196.979 | 2272.275 | 2595.784 | -0.02421 | 0.387684972 | 0.897989514 |
| 8.040998 | 22.29542 | 13.62341 | 0.794522 | 0.563625743 | NA          |
| 537.8534 | 431.9737 | 503.0183 | -0.00347 | 0.542904501 | 0.996992829 |
| 121.5084 | 116.122  | 130.9944 | -0.0738  | 0.324105472 | 0.897989514 |
| 385.9679 | 326.9995 | 338.4894 | -0.10486 | 0.352221493 | 0.692421497 |
| 1983.446 | 2058.61  | 2094.862 | 0.160163 | 0.015489924 | 0.167499635 |
| 770.149  | 676.2944 | 901.2412 | -0.62698 | 0.875720952 | 3.79149E-05 |
| 51.81977 | 64.09933 | 45.06206 | 0.13622  | 0.827268091 | 0.825561751 |
| 2557.931 | 2373.533 | 2566.442 | 0.272584 | 0.484625827 | 0.008127598 |
| 179.5823 | 156.9969 | 132.0423 | -0.42298 | 0.256151839 | 0.245748269 |
| 187.6233 | 163.4997 | 162.433  | -0.21567 | 0.740079901 | 0.543394748 |
| 1048.904 | 1041.382 | 1283.745 | -0.27555 | 0.910682739 | 0.10904213  |
| 779.9768 | 743.1806 | 1067.866 | -0.43669 | 0.458486853 | 0.016996857 |
| 432.427  | 541.5929 | 530.2652 | -0.18442 | 0.599793836 | 0.402824474 |
| 2957.3   | 2908.623 | 2427.064 | 0.134766 | 0.242725862 | 0.622128808 |

|          |          |          |          |             |             |
|----------|----------|----------|----------|-------------|-------------|
| 1802.077 | 1752.977 | 1871.647 | 0.017668 | 0.765366348 | 0.922101817 |
| 1593.011 | 1653.577 | 1744.845 | 0.02576  | 0.014847555 | 0.904874311 |
| 3003.76  | 2992.231 | 3435.196 | -0.33031 | 0.613451408 | 0.018761765 |
| 13693.82 | 13811.08 | 15188.01 | -0.52539 | 0.000495416 | 3.36128E-07 |
| 30305.63 | 31098.39 | 31949    | 0.126294 | 0.121695117 | 0.326965278 |
| 3817.687 | 3986.235 | 4037.77  | -0.12978 | 0.720895932 | 0.437989627 |
| 7534.415 | 7627.82  | 8329.145 | -0.27852 | 0.735300868 | 0.059797997 |
| 2010.25  | 1939.701 | 1767.9   | 0.085998 | 0.493325129 | 0.63864783  |
| 700.4603 | 791.4873 | 653.9239 | 0.197172 | 0.730407446 | 0.357441003 |
| 59.86077 | 48.30674 | 64.9732  | -0.25642 | 0.043196135 | 0.630318178 |
| 1591.224 | 1700.955 | 1913.566 | -0.14504 | 0.915168823 | 0.52313639  |
| 35.73777 | 39.01698 | 52.39774 | -0.59221 | 0.914186189 | NA          |
| 56.28699 | 25.08235 | 66.02116 | -0.04962 | 0.794232621 | NA          |
| 586.0994 | 667.9336 | 668.5952 | -0.04981 | 0.817609984 | 0.825078673 |
| 2207.701 | 2331.729 | 2182.89  | 0.04797  | 0.836333106 | 0.780791262 |
| 22.33611 | 34.3721  | 35.63047 | 0.25254  | 0.804360442 | 0.715956488 |
| 2236.291 | 2488.726 | 2586.353 | -0.1864  | 0.648845683 | 0.241905667 |
| 1264.224 | 1359.092 | 1343.478 | 0.020616 | 0.369977802 | 0.918453677 |
| 1064.986 | 1011.655 | 1162.182 | -0.75929 | 0.000820039 | 7.91344E-11 |
| 83.09032 | 109.6191 | 129.9464 | -0.33425 | 0.654632751 | 0.365745492 |
| 856.813  | 756.1863 | 861.4189 | 0.119503 | 0.427171669 | 0.552800466 |
| 2103.168 | 2234.187 | 2109.533 | 0.07832  | 0.840099446 | 0.667557921 |
| 6419.397 | 6714.637 | 7200.498 | -0.29317 | 0.960956671 | 0.049713965 |
| 30.3771  | 23.22439 | 15.71932 | -0.21018 | 0.835664498 | 0.796040638 |
| 1778.848 | 1659.151 | 1869.552 | 0.039038 | 0.089121906 | 0.884584155 |
| 488.714  | 483.9964 | 525.0254 | -0.17514 | 0.411467295 | 0.411708366 |
| 3778.376 | 3580.273 | 3489.69  | -0.12934 | 0.175067813 | 0.521450212 |
| 5223.969 | 5881.346 | 5373.913 | -0.22431 | 0.00602068  | 0.10377158  |
| 1119.486 | 1105.481 | 976.694  | 0.170666 | 0.923281561 | 0.321291302 |
| 1263.33  | 1102.694 | 959.9267 | 0.1954   | 0.907095813 | 0.489096476 |
| 1680.569 | 1653.577 | 1496.48  | 0.068457 | 0.813154117 | 0.693887308 |
| 246.5906 | 232.2439 | 337.4415 | -0.6256  | 2.0377E-15  | 0.042769614 |
| 8308.138 | 8806.69  | 8491.579 | -0.02842 | 0.985859213 | 0.863611229 |
| 383.2876 | 433.8317 | 399.2708 | -0.03453 | 0.777280242 | 0.901028548 |
| 2428.381 | 2450.638 | 2882.924 | -0.32212 | 0.183178382 | 0.025667068 |
| 4986.312 | 4826.029 | 4135.23  | 0.123165 | 0.785971011 | 0.631325703 |
| 90.23787 | 65.0283  | 63.92525 | -0.07363 | 0.992511525 | 0.924895748 |
| 11969.47 | 12212.32 | 12146.85 | -0.19758 | 0.938838346 | 0.088369497 |
| 1237.42  | 1191.876 | 1218.772 | 0.055471 | 0.019250807 | 0.791888862 |
| 2429.275 | 2368.888 | 2397.721 | -0.07863 | 4.662E-05   | 0.596995764 |
| 305.5579 | 295.4143 | 245.2214 | -0.39785 | 0.003603481 | 0.098823212 |
| 2194.299 | 2075.332 | 2178.698 | -0.00865 | 0.759069408 | 0.965253376 |
| 3230.694 | 3286.716 | 3662.602 | 0.095806 | 0.248671635 | 0.575540189 |
| 3437.08  | 3263.492 | 3160.632 | 0.25696  | 0.270092699 | 0.006992399 |
| 327.894  | 305.633  | 362.5924 | -0.09236 | 0.944990108 | 0.727738403 |
| 1012.272 | 988.4302 | 997.6531 | -0.07674 | 1.41548E-17 | 0.673302041 |
| 452.9762 | 415.2522 | 441.189  | -0.0873  | 0.206816173 | 0.727797788 |
| 3.573777 | 2.786927 | 2.09591  | 2.682823 | 0.108299464 | NA          |
| 1766.339 | 1839.372 | 1862.216 | -0.11594 | 0.434274199 | 0.510881602 |
| 218.0004 | 300.9881 | 299.7151 | 0.328722 | 0.39778623  | 0.269755378 |
| 1971.831 | 1969.429 | 1779.427 | 0.22344  | 0.263755993 | 0.231047495 |
| 1868.192 | 1922.051 | 1795.147 | -0.07912 | 0.000647509 | 0.603217016 |
| 432.427  | 462.6299 | 414.9901 | 0.16319  | 0.852550008 | 0.462481429 |
| 619.1569 | 706.0216 | 604.67   | 0.024314 | 0.828016939 | 0.919915102 |



|          |          |          |          |             |             |
|----------|----------|----------|----------|-------------|-------------|
| 1635.896 | 1656.364 | 1667.296 | -0.03099 | 0.819879878 | 0.877477421 |
| 536.0666 | 544.3798 | 441.189  | 0.398556 | 0.716063981 | 0.258108467 |
| 3230.694 | 3112.069 | 3856.474 | -0.457   | 0.827268091 | 0.000143823 |
| 436.8942 | 490.4992 | 576.3752 | -0.02958 | 0.652135039 | 0.915888123 |
| 995.2969 | 811.9248 | 930.5839 | 0.457451 | 0.707092679 | 0.008625676 |
| 139.3773 | 126.3407 | 106.8914 | -0.09613 | 0.108117004 | 0.844024501 |
| 6741.93  | 6944.094 | 7432.096 | -0.16241 | 0.864963799 | 0.306279885 |
| 194.7708 | 229.457  | 159.2891 | -0.12888 | 0.004702869 | 0.778166558 |
| 1813.692 | 1731.611 | 1504.863 | -0.04221 | 0.929188034 | 0.891241787 |
| 1480.437 | 1566.253 | 1632.714 | -0.06902 | 0.881898117 | 0.741928459 |
| 5822.576 | 5752.218 | 5532.154 | -0.18122 | 0.18266723  | 0.117033962 |
| 1295.494 | 1280.129 | 1554.117 | 0.077698 | 0.587719544 | 0.699804545 |
| 341.2957 | 338.1472 | 380.4076 | -0.32498 | 0.004988115 | 0.167597558 |
| 1689.503 | 1607.128 | 1816.106 | 0.013237 | 0.007236622 | 0.9611653   |
| 22330.75 | 21596.83 | 19299.14 | 0.173279 | 0.043426903 | 0.198756229 |
| 3477.285 | 3642.514 | 3626.972 | -0.10607 | 0.971689046 | 0.443898537 |
| 222.4676 | 237.8178 | 221.1185 | -0.30349 | 0.46334755  | 0.20379563  |
| 1098.936 | 1004.223 | 914.8646 | 0.326692 | 0.826718993 | 0.057117557 |
| 2240.758 | 2583.482 | 2357.899 | -0.08378 | 0.907472172 | 0.710256666 |
| 314.4924 | 256.3973 | 249.4133 | -0.18838 | 0.941098554 | 0.497130933 |
| 560.1895 | 456.1271 | 477.8674 | 0.20832  | 0.975408215 | 0.545985077 |
| 2740.194 | 2829.66  | 3279.051 | -0.125   | 0.940969382 | 0.431825344 |
| 1530.47  | 1684.233 | 1796.195 | -0.0834  | 0.942498782 | 0.616511903 |
| 11098.36 | 10882.02 | 10058.27 | -0.48777 | 0.004283832 | 2.54396E-05 |
| 1027.461 | 1004.223 | 990.3174 | 0.226016 | 0.795376015 | 0.158759962 |
| 1161.478 | 1078.541 | 1087.777 | -0.00224 | 0.756107114 | 0.99985654  |
| 1071.24  | 1029.305 | 944.2074 | 0.16553  | 0.194542134 | 0.410453641 |
| 355.5908 | 333.5023 | 301.811  | -0.01685 | 0.814880408 | 0.974018993 |
| 858.5999 | 1000.507 | 996.6051 | -0.06786 | 0.230523928 | 0.789143179 |
| 92.9182  | 68.74421 | 80.69253 | 0.149418 | 0.816044012 | 0.745567347 |
| 739.7718 | 744.1096 | 811.1171 | -0.15077 | 0.000107991 | 0.380264685 |
| 2111.209 | 2172.874 | 2084.382 | 0.049768 | 0.392876266 | 0.767705112 |
| 2000.422 | 2109.704 | 1935.573 | 0.096079 | 0.98062117  | 0.552800466 |
| 12.50822 | 10.21873 | 13.62341 | -0.58925 | 0.817609984 | NA          |
| 432.427  | 397.6016 | 515.5938 | -0.14805 | 0.996328617 | 0.577160388 |
| 190.3036 | 182.0792 | 146.7137 | 0.061612 | 0.58195463  | 0.888191125 |
| 342.1892 | 401.3175 | 403.4626 | -0.08355 | 0.948234757 | 0.742276559 |
| 918.4607 | 838.8651 | 817.4048 | 0.16067  | 0.707368241 | 0.419308591 |
| 73.26243 | 45.51981 | 33.53456 | -0.40774 | 0.008810437 | NA          |
| 197.4512 | 231.315  | 202.2553 | 0.145369 | 0.923471886 | 0.612005134 |
| 100.9592 | 97.54245 | 111.0832 | 0.158084 | 0.988049891 | 0.763234817 |
| 1051.584 | 966.1348 | 1033.284 | 0.40827  | 0.231538797 | 0.003281665 |
| 1638.577 | 1438.983 | 1756.372 | 0.45766  | 0.713312904 | 0.000794237 |
| 69.68865 | 97.54245 | 96.41185 | -0.05999 | 0.69597302  | 0.914491385 |
| 1147.182 | 1069.251 | 1122.36  | -0.02246 | 0.068521623 | 0.919258281 |
| 29941.1  | 30719.37 | 31574.88 | -0.06068 | 0.193381894 | 0.697184019 |
| 54.5001  | 71.53113 | 50.30183 | -0.42754 | 0.216003389 | 0.282321884 |
| 189.4102 | 184.8662 | 177.1044 | 0.437155 | 0.44116367  | 0.125404151 |
| 2492.709 | 2481.294 | 2590.544 | -0.24522 | 0.122047295 | 0.045662236 |
| 399.3696 | 314.9228 | 401.3667 | -0.12108 | 0.411467295 | 0.751339004 |
| 10736.52 | 11033.45 | 10840.05 | -0.01474 | 0.868137167 | 0.915543523 |
| 1719.88  | 1616.418 | 1329.855 | 0.024747 | 0.172366864 | 0.941096765 |
| 15702.28 | 15331.82 | 16750.51 | -0.24915 | 0.452120082 | 0.097010642 |
| 213.5332 | 212.7354 | 258.8449 | 0.180932 | 0.609236349 | 0.61918051  |

|          |          |          |          |               |             |
|----------|----------|----------|----------|---------------|-------------|
| 370.7794 | 377.1642 | 385.6474 | 0.062516 | 0.240910061   | 0.843790109 |
| 488.714  | 349.2949 | 339.5374 | 0.037979 | 0.988049891   | 0.914120833 |
| 1064.092 | 1046.027 | 1169.518 | -0.02111 | 0.73037883    | 0.915543523 |
| 334.1482 | 376.2352 | 384.5994 | 0.243827 | 0.268149097   | 0.345371472 |
| 2604.39  | 2493.371 | 2844.15  | 0.28481  | 0.990604058   | 0.142827251 |
| 6046.831 | 5774.513 | 5710.306 | 0.518567 | 0.034815958   | 1.51115E-08 |
| 122.4019 | 104.0453 | 157.1932 | 0.228609 | 0.78204194    | 0.610358054 |
| 584.3125 | 667.0046 | 747.1918 | -0.18483 | 0.960823113   | 0.383759687 |
| 1409.855 | 1330.293 | 1154.846 | 0.223943 | 0.223096937   | 0.341785585 |
| 1643.044 | 1552.318 | 1822.394 | -0.06507 | 0.368085564   | 0.786995178 |
| 435.1074 | 485.8543 | 493.5868 | -0.18762 | 0.803137847   | 0.277184815 |
| 3479.072 | 3444.642 | 3397.47  | 0.111796 | 0.830540147   | 0.414781698 |
| 952.4116 | 947.5553 | 866.6587 | -0.12866 | 0.71440019    | 0.505493145 |
| 494.9681 | 476.5646 | 601.5261 | -0.58278 | 0.707092679   | 0.001227995 |
| 2482.882 | 2451.567 | 2322.268 | 0.022766 | 0.81966368    | 0.893536629 |
| 950.6247 | 961.4899 | 1095.113 | -0.06307 | 0.967813477   | 0.764996976 |
| 58.07388 | 59.45445 | 64.9732  | -0.4845  | 0.636895882   | 0.249412887 |
| 114.3609 | 66.88625 | 71.26093 | -0.10605 | 0.739579196   | 0.891241787 |
| 1216.871 | 1288.489 | 1229.251 | -0.10502 | 0.669860929   | 0.437989627 |
| 55.39354 | 46.44879 | 47.15797 | -0.92465 | 0.000902992   | 0.024245585 |
| 553.042  | 527.6582 | 613.0536 | -0.26008 | 0.773823303   | 0.224439117 |
| 200.1315 | 226.6701 | 159.2891 | 0.310564 | 0.759261525   | 0.443898537 |
| 5159.641 | 5222.702 | 5006.081 | -0.15132 | 0.043795381   | 0.146525829 |
| 4126.819 | 4237.987 | 4034.626 | -0.44237 | 0.248671635   | 4.37599E-06 |
| 12966.56 | 13358.67 | 12647.77 | 0.091827 | 0.408488796   | 0.376402197 |
| 7814.063 | 7864.709 | 8680.21  | 0.254387 | 0.812613014   | 0.011498772 |
| 2602.603 | 2731.189 | 2745.642 | -0.10866 | 6.59346E-21   | 0.37426169  |
| 4088.401 | 4088.422 | 4091.216 | 0.138298 | 0.594096059   | 0.422116695 |
| 177.7954 | 175.5764 | 221.1185 | -0.40933 | 0.756571209   | 0.220334464 |
| 8017.769 | 7742.084 | 7254.992 | 0.002416 | 3.79424E-06   | 0.990142758 |
| 18074.38 | 18256.23 | 15286.52 | 0.348122 | 0.994015824   | 0.00675258  |
| 1192.748 | 1214.171 | 1206.196 | -0.19621 | 0.92540314    | 0.167165088 |
| 2929.604 | 2742.336 | 2977.24  | 0.217331 | 0.867574132   | 0.035240969 |
| 369.8859 | 383.667  | 368.8801 | 0.115602 | 0.969843993   | 0.656258611 |
| 1099.83  | 1092.475 | 1093.017 | -0.10286 | 0.941323092   | 0.639253997 |
| 670.9766 | 622.4138 | 702.1298 | 0.278588 | 0.462806034   | 0.169032618 |
| 5249.878 | 5160.46  | 5086.773 | 0.178367 | 0.862474177   | 0.0410944   |
| 3268.219 | 3002.45  | 2909.123 | 0.262217 | 0.387628548   | 0.090835789 |
| 39.31155 | 32.51415 | 48.20593 | -0.03689 | 0.91441696 NA |             |
| 1735.069 | 1827.295 | 2063.423 | -0.31077 | 0.914186189   | 0.055894075 |
| 43585.78 | 45095.27 | 47477.6  | -0.00707 | 0.536033731   | 0.97680656  |
| 1826.2   | 1876.531 | 1663.104 | 0.100139 | 0.211120083   | 0.639831259 |
| 1000.658 | 973.5666 | 1018.612 | -0.01558 | 0.107942056   | 0.960940117 |
| 236.7627 | 253.6104 | 253.6051 | -0.76577 | 1.09818E-06   | 0.000164663 |
| 346697.5 | 334847.5 | 328628.2 | -0.16742 | 0.69974305    | 0.251658635 |
| 450.2959 | 453.3402 | 366.7842 | 0.300285 | 0.477021755   | 0.224439117 |
| 14080.68 | 13406.05 | 12051.48 | 0.013759 | 0.075841354   | 0.951184679 |
| 229.6152 | 224.8121 | 275.6121 | 0.102183 | 0.547973756   | 0.752110266 |
| 224.2545 | 208.0906 | 217.9746 | -0.06215 | 0.956429932   | 0.831655346 |
| 1774.38  | 1772.486 | 2083.334 | 0.423482 | 0.917013507   | 0.058175507 |
| 26.80333 | 22.29542 | 15.71932 | -0.27553 | 0.084125911   | 0.745567347 |
| 1344.634 | 1558.821 | 1378.061 | 0.112078 | 0.780724949   | 0.536664638 |
| 1380.371 | 1200.237 | 1487.048 | -0.25725 | 0.107676441   | 0.137586476 |
| 1253.502 | 1281.987 | 1391.684 | -0.15604 | 0.885070844   | 0.366445441 |

|          |          |          |          |             |             |
|----------|----------|----------|----------|-------------|-------------|
| 863.0672 | 866.7344 | 927.4401 | -0.02541 | 0.258320792 | 0.914949396 |
| 205.4922 | 185.7952 | 209.591  | -0.27683 | 0.886941063 | 0.278856737 |
| 6282.7   | 5980.746 | 6485.793 | 0.095096 | 0.981637588 | 0.498608433 |
| 1423.257 | 1353.518 | 1088.825 | -0.83656 | 2.30178E-13 | 2.95106E-11 |
| 503.9026 | 523.9423 | 483.1072 | 0.040174 | 0.055422007 | 0.884584155 |
| 746.026  | 711.5954 | 738.8082 | -0.25906 | 0.984233953 | 0.070778066 |
| 453.8697 | 399.4596 | 341.6333 | 0.147617 | 0.033611173 | 0.679633204 |
| 1453.634 | 1347.015 | 1344.526 | 0.103709 | 0.184354392 | 0.515558505 |
| 1360.716 | 1440.841 | 1613.851 | -0.31922 | 0.378784486 | 0.032265541 |
| 1250.822 | 1082.257 | 1165.326 | 0.021179 | 0.5124279   | 0.937994709 |
| 8728.95  | 9018.497 | 9403.299 | -0.03825 | 0.708719765 | 0.841661214 |
| 1212.404 | 1235.538 | 1402.164 | -0.49431 | 0.817609984 | 0.000330467 |
| 353.8039 | 375.3062 | 361.5444 | -0.05183 | 0.978482639 | 0.861226913 |
| 0        | 0        | 1.047955 | #DIV/0!  | NA          |             |
| 797.8457 | 780.3396 | 746.1439 | 0.014582 | 0.989430108 | 0.958055441 |
| 844.3048 | 715.3113 | 685.3625 | 0.138636 | 0.621093622 | 0.536590083 |
| 1453.634 | 1349.802 | 1261.738 | 0.236777 | 0.786126042 | 0.119008343 |
| 3315.572 | 3052.614 | 3267.523 | -0.05903 | 0.962556121 | 0.764338813 |
| 835.3704 | 826.7884 | 979.8378 | -0.48323 | 6.59346E-21 | 0.001092886 |
| 1427.724 | 1450.131 | 1692.447 | -0.213   | 0.469841794 | 0.192883976 |
| 1685.036 | 1552.318 | 1579.268 | 0.295625 | 0.812875146 | 0.114779587 |
| 854.1327 | 840.7231 | 825.7885 | 0.175307 | 0.29215357  | 0.25282015  |
| 156.3527 | 125.4117 | 219.0226 | -0.3775  | 0.151275206 | 0.238475413 |
| 571.8043 | 604.7632 | 578.4711 | -0.24125 | 0.700017119 | 0.104544983 |
| 2552.57  | 2221.181 | 1829.729 | 0.207172 | 0.923364203 | 0.334275175 |
| 989.9362 | 928.0468 | 854.0832 | 0.289931 | 0.861070915 | 0.136946799 |
| 48.24599 | 47.37776 | 36.67842 | 0.212552 | 0.759261525 | 0.775439768 |
| 402.9434 | 379.9511 | 431.7574 | -0.07254 | 0.38441957  | 0.810673588 |
| 804.9933 | 881.598  | 774.4387 | 0.040258 | 0.149692089 | 0.848456292 |
| 426.1729 | 484.9253 | 493.5868 | -0.04434 | 0.281045561 | 0.9018207   |
| 30.3771  | 76.17601 | 39.82229 | -0.51728 | 0.437903723 | NA          |
| 105.4264 | 130.0566 | 126.8025 | 0.52243  | 0.837998472 | 0.329120807 |
| 945.264  | 967.0638 | 1055.291 | -0.14282 | 0.743726011 | 0.362995196 |
| 13.40166 | 16.72156 | 26.19887 | -1.51655 | 0.006057733 | 0.002226503 |
| 1640.364 | 1559.75  | 1510.103 | -0.04868 | 0.356652725 | 0.753881265 |
| 611.1159 | 520.2264 | 482.0593 | 0.133718 | 0.880937401 | 0.70012042  |
| 103.6395 | 96.61348 | 105.8434 | -0.21232 | 0.54644861  | 0.772286348 |
| 981.0018 | 920.615  | 931.6319 | 0.102945 | 0.158417136 | 0.562294649 |
| 810.3539 | 807.2799 | 890.7617 | -0.01267 | 0.358629856 | 0.964000071 |
| 147.4183 | 170.9315 | 146.7137 | 0.189545 | 0.17223247  | 0.680886616 |
| 2596.349 | 2576.979 | 2511.948 | 0.087061 | 0.652050398 | 0.55088846  |
| 22.33611 | 23.22439 | 11.5275  | -0.24042 | 0.610423065 | NA          |
| 1091.789 | 1033.95  | 919.0564 | 0.058397 | 0.992476114 | 0.818645356 |
| 430.6401 | 434.7607 | 421.2779 | -0.10175 | 0.973340554 | 0.684394991 |
| 5.360666 | 7.431806 | 24.10296 | 0.772271 | NA          | NA          |
| 573.5912 | 629.8456 | 598.3822 | -0.03092 | 0.270092699 | 0.897595016 |
| 234.9758 | 222.0252 | 190.7278 | -0.20451 | 0.523839234 | 0.537545497 |
| 24.12299 | 60.38342 | 68.11707 | -0.39506 | 0.614621507 | NA          |
| 2326.529 | 2493.371 | 2036.176 | 0.163413 | 0.727101377 | 0.361564535 |
| 973.8542 | 771.0499 | 964.1185 | -0.19884 | 0.823340861 | 0.402016091 |
| 1889.635 | 1928.554 | 1934.525 | 0.477718 | 0.796419683 | 1.03473E-05 |
| 4299.254 | 4296.513 | 4987.217 | -0.0086  | 0.795709704 | 0.974222974 |
| 4152.729 | 4525.041 | 4652.92  | -0.1859  | 0.792383666 | 0.145716826 |
| 380.6073 | 295.4143 | 362.5924 | -0.09383 | 0.88849017  | 0.735679134 |

|          |          |          |            |                |             |
|----------|----------|----------|------------|----------------|-------------|
| 3588.072 | 3363.821 | 3221.413 | 0.228723   | 0.814880408    | 0.166877585 |
| 687.9521 | 674.4364 | 622.4852 | 0.010816   | 0.310443697    | 0.962868426 |
| 48.24599 | 59.45445 | 71.26093 | 0.560007   | 0.067023828    | 0.322653852 |
| 1036.395 | 932.6917 | 858.2751 | 0.266428   | 0.843186128    | 0.149383412 |
| 0        | 0        | 0        | #DIV/0! NA | NA             |             |
| 786.2309 | 771.0499 | 797.4937 | -0.17192   | 0.211078128    | 0.406583019 |
| 620.9438 | 669.7915 | 756.6234 | -0.68653   | 0.059624319    | 3.25913E-05 |
| 1769.02  | 1877.46  | 1842.305 | -0.04357   | 0.935523245    | 0.855436532 |
| 22.33611 | 25.08235 | 35.63047 | -0.25745   | 0.962660515    | 0.730859949 |
| 2486.455 | 2532.388 | 2920.65  | -0.26657   | 0.800508699    | 0.065706279 |
| 4453.82  | 4536.189 | 4599.474 | -0.07087   | 0.504924333    | 0.602240104 |
| 5377.641 | 5427.076 | 5084.677 | 0.059182   | 0.174380645    | 0.789143179 |
| 3094.891 | 3278.355 | 3178.447 | -0.12045   | 0.832043227    | 0.484163033 |
| 1862.831 | 1666.583 | 1319.375 | 0.122454   | 0.000544345    | 0.891918558 |
| 861.2803 | 883.4559 | 792.2539 | 0.356303   | 0.446999299    | 0.060851524 |
| 633.452  | 746.8965 | 763.9591 | -0.233     | 0.603004299    | 0.229480039 |
| 1932.52  | 1734.398 | 1545.733 | 0.157333   | 0.976681492    | 0.39908158  |
| 553.9354 | 598.2604 | 660.2116 | -0.25957   | 0.535948266    | 0.173157511 |
| 40.20499 | 64.09933 | 74.4048  | -0.01112   | 0.310443697    | 0.973438605 |
| 2316.701 | 2309.434 | 2014.169 | 0.199823   | 0.327964932    | 0.27042216  |
| 370.7794 | 429.1868 | 333.2497 | -0.1738    | 0.853477462    | 0.471424918 |
| 1427.724 | 1582.046 | 1863.264 | -0.08663   | 0.269120346    | 0.739592868 |
| 534.2797 | 520.2264 | 442.237  | -0.18953   | 0.037913264    | 0.348015857 |
| 1692.183 | 1754.835 | 1929.285 | -0.09319   | 0.020628498    | 0.518372194 |
| 0        | 0        | 0        | #DIV/0!    | 0.732140966 NA |             |
| 3379.9   | 3463.222 | 3770.542 | -0.2093    | 0.890079517    | 0.168811904 |
| 536.0666 | 475.6356 | 454.8124 | 0.404199   | 0.405459844    | 0.030614917 |
| 33.95088 | 81.74987 | 119.4669 | 0.407514   | 0.975298616    | 0.515376266 |
| 9344.533 | 9272.107 | 8772.43  | 0.049866   | 0.340833229    | 0.708273109 |
| 503.9026 | 487.7123 | 492.5388 | -0.18367   | 0.29215357     | 0.327033685 |
| 1877.126 | 1897.897 | 2692.196 | -0.63013   | 0.988049891    | 6.10192E-05 |
| 343.0826 | 385.5249 | 412.8942 | -0.14108   | 0.001178787    | 0.609093663 |
| 1073.92  | 1207.668 | 1362.341 | -0.45219   | 7.08114E-06    | 0.007516064 |
| 974.7477 | 964.2768 | 942.1114 | 0.143858   | 0.92288341     | 0.55088846  |
| 3372.752 | 3023.816 | 3401.662 | -0.12322   | 0.515985444    | 0.399686741 |
| 33.05744 | 33.44313 | 44.01411 | -0.395     | 0.58195463     | 0.474497273 |
| 6.25411  | 12.07668 | 6.287729 | -0.83589   | 0.899176451 NA |             |
| 1284.773 | 1283.845 | 1161.134 | 0.401135   | 0.269842373    | 0.001173192 |
| 5388.362 | 5237.565 | 6698.528 | -0.3408    | 0.734322432    | 0.020171833 |
| 559.2961 | 548.0957 | 607.8138 | -0.09302   | 0.032727278    | 0.70713713  |
| 69.68865 | 92.89758 | 91.17208 | 0.226289   | 0.902390281    | 0.681319476 |
| 398.4761 | 478.4225 | 451.6686 | -0.04548   | 0.907095813    | 0.8721296   |
| 3846.278 | 3740.056 | 3747.487 | -0.07195   | 0.483436974    | 0.590308649 |
| 463.6976 | 294.4853 | 488.347  | 0.060356   | 0.934867993    | 0.872630949 |
| 519.0911 | 596.4024 | 600.4782 | -0.17675   | 0.00628885     | 0.413086202 |
| 619.1569 | 670.7205 | 610.9577 | 0.188441   | 0.430461737    | 0.437727687 |
| 1203.469 | 1161.22  | 1237.635 | -0.09455   | 0.098885444    | 0.547356673 |
| 561.9764 | 530.4452 | 609.9097 | -0.39629   | 0.137142422    | 0.010607892 |
| 644.1733 | 701.3767 | 714.7052 | 0.462823   | 0.00382129     | 0.07575529  |
| 496.755  | 426.3999 | 410.7983 | 0.378435   | 0.947527175    | 0.178134034 |
| 24219.49 | 22135.63 | 26864.32 | -0.10363   | 0.831439424    | 0.681319476 |
| 1760.979 | 1778.06  | 1605.467 | 0.197511   | 0.717185827    | 0.373144367 |
| 132.2298 | 135.6305 | 132.0423 | 0.653785   | 0.899176451    | 0.055252373 |
| 6146.896 | 5936.155 | 6448.066 | -0.27052   | 0.028028845    | 0.078319563 |

|          |          |          |          |             |             |
|----------|----------|----------|----------|-------------|-------------|
| 675.4439 | 678.1523 | 574.2793 | 0.27374  | 0.327634019 | 0.312936006 |
| 221.5742 | 263.8291 | 281.8999 | 0.209948 | 0.032727278 | 0.546687977 |
| 34231.42 | 33728.32 | 32413.24 | -0.30527 | 0.779325825 | 0.017617207 |
| 2118.356 | 2088.338 | 2136.78  | 0.042917 | 0.981076246 | 0.797601985 |
| 3865.933 | 3811.588 | 3739.103 | -0.26764 | 0.334053294 | 0.006455545 |
| 441.3615 | 428.2578 | 421.2779 | -0.15982 | 0.362090257 | 0.517983853 |
| 527.1321 | 598.2604 | 777.5825 | -0.42728 | 0.823319422 | 0.035071812 |
| 279.6481 | 263.8291 | 233.6939 | -0.25932 | 0.116786217 | 0.422560599 |
| 5009.542 | 4982.097 | 4646.632 | 0.221261 | 0.72031406  | 0.022150533 |
| 10970.6  | 10255.89 | 11956.12 | -0.19862 | 0.62498123  | 0.181864152 |
| 526.2387 | 589.8996 | 617.2454 | 0.051431 | 0.337335124 | 0.838085776 |
| 1245.461 | 1154.717 | 1183.141 | -0.03545 | 0.324651337 | 0.876474178 |
| 1275.838 | 1101.765 | 1151.702 | -0.00016 | 0.904997879 | 0.997242119 |
| 788.0178 | 695.8028 | 691.6502 | 0.039455 | 0.866874007 | 0.87057216  |
| 4405.574 | 4373.618 | 4539.741 | -0.00111 | 0.344168489 | 0.996992829 |
| 1140.928 | 1063.677 | 965.1665 | 0.396822 | 0.900383237 | 0.003590571 |
| 1922.692 | 1950.849 | 1984.827 | 0.450239 | 0.572336545 | 9.09677E-05 |
| 3403.129 | 3414.915 | 2896.547 | -0.03495 | 0.836327255 | 0.869498619 |
| 972.0674 | 1016.299 | 1138.079 | 0.060668 | 0.908829279 | 0.786706509 |
| 13.40166 | 11.14771 | 14.67137 | -0.10592 | 0.337999896 | NA          |
| 11662.13 | 11306.56 | 11244.56 | 0.023266 | 0.892614393 | 0.864252513 |
| 10.72133 | 15.79259 | 10.47955 | -0.93675 | 0.525774075 | NA          |
| 729.0505 | 689.3    | 770.2468 | 0.208106 | 0.98409529  | 0.390907234 |
| 747.8128 | 680.9392 | 701.0818 | -0.02087 | 0.804093095 | 0.919258281 |
| 773.7227 | 943.8394 | 915.9126 | -0.0832  | 0.022766512 | 0.746009092 |
| 2367.627 | 2438.561 | 2175.554 | -0.0047  | 0.756663214 | 0.988370025 |
| 2952.833 | 3056.33  | 2761.361 | 0.200295 | 0.014083611 | 0.077779052 |
| 2346.185 | 2526.814 | 1954.436 | 0.243239 | 0.174380645 | 0.10698808  |
| 743.3456 | 795.2033 | 681.1707 | 0.070366 | 0.107676441 | 0.759084977 |
| 452.0828 | 458.914  | 389.8392 | 0.246612 | 0.485732259 | 0.233530606 |
| 1078.387 | 1122.203 | 947.3512 | 0.17579  | 0.901380807 | 0.328024792 |
| 415.4516 | 483.9964 | 505.1143 | 0.015665 | 0.358055859 | 0.963671998 |
| 461.9107 | 465.4169 | 471.5797 | -0.24839 | 0.39778623  | 0.240259541 |
| 2742.874 | 2463.644 | 2330.652 | 0.030401 | 0.004702869 | 0.882531058 |
| 2483.775 | 2351.238 | 2355.803 | -0.00402 | 0.00758806  | 0.983593071 |
| 352.9105 | 296.3433 | 311.2426 | 0.086003 | 0.310443697 | 0.80030609  |
| 953.305  | 907.6093 | 777.5825 | 0.12771  | 0.46334755  | 0.573023969 |
| 648.6405 | 545.3088 | 516.6418 | 0.178954 | 0.668494236 | 0.484163033 |
| 245.6972 | 228.528  | 186.536  | 0.085696 | 0.732140966 | 0.795076358 |
| 1800.29  | 1839.372 | 1912.518 | -0.4258  | 0.363948776 | 2.16222E-05 |
| 366.3121 | 364.1585 | 407.6545 | 0.060802 | 0.310639346 | 0.872630949 |
| 12912.06 | 12284.78 | 12944.34 | -0.0237  | 0.867587609 | 0.882565871 |
| 483.3533 | 451.4822 | 534.457  | -0.13317 | 0.072132871 | 0.551771495 |
| 283.2218 | 300.0592 | 296.5712 | -0.01702 | 0.54674796  | 0.961973803 |
| 261.7792 | 320.4966 | 317.5303 | -0.51782 | 0.011094445 | 0.010211629 |
| 0        | 13.00566 | 2.09591  | -0.21187 | 0.917641799 | NA          |
| 165.2872 | 148.6361 | 160.3371 | -0.0695  | 0.972861407 | 0.862412114 |
| 1875.339 | 1867.241 | 1847.544 | 0.320949 | 0.699717555 | 0.075363288 |
| 1043.543 | 950.3422 | 710.5134 | 0.145897 | 0.2795135   | 0.703203936 |
| 440.468  | 442.1925 | 481.0113 | -0.0329  | 0.730204074 | 0.908612163 |
| 598.6077 | 628.9166 | 591.0466 | 0.060533 | 0.170750865 | 0.818645356 |
| 17392.68 | 17164.69 | 16838.54 | -0.00216 | 0.729944386 | 0.993537704 |
| 857.7065 | 893.6747 | 855.1312 | -0.16149 | 0.767024472 | 0.378149996 |
| 1945.922 | 1938.772 | 1673.584 | 0.25392  | 0.666493976 | 0.066899278 |

|          |          |          |          |             |             |
|----------|----------|----------|----------|-------------|-------------|
| 1140.928 | 1239.254 | 1162.182 | -0.35842 | 0.787792061 | 0.007395438 |
| 231.4021 | 204.3747 | 280.8519 | -0.43019 | 0.775670478 | 0.040486778 |
| 537.8534 | 575.036  | 466.3399 | 0.02113  | 0.826883467 | 0.928761588 |
| 443.1484 | 460.772  | 448.5247 | -0.28082 | 0.220715145 | 0.131023807 |
| 637.9192 | 667.9336 | 694.7941 | 0.173402 | 0.853790729 | 0.49586958  |
| 1184.707 | 1191.876 | 1290.032 | -0.16058 | 0.045913153 | 0.241819205 |
| 432.427  | 400.3886 | 353.1608 | 0.146145 | 0.172531274 | 0.558104763 |
| 1504.56  | 1481.716 | 1561.453 | -0.00809 | 0.324651337 | 0.975879427 |
| 1478.65  | 1387.89  | 1431.506 | 0.000824 | 0.000290047 | 0.997242119 |
| 1818.159 | 1874.673 | 1747.989 | 0.102316 | 0.231792531 | 0.509540888 |
| 4850.509 | 4701.546 | 4418.178 | 0.141002 | 0.038561058 | 0.438784455 |
| 492.2878 | 536.948  | 468.4358 | 0.063635 | 0.579600128 | 0.824241705 |
| 619.1569 | 610.3371 | 704.2257 | -0.21274 | 0.819847692 | 0.384859717 |
| 962.2395 | 998.6489 | 804.8294 | 0.13179  | 0.912898714 | 0.544534957 |
| 21.44266 | 17.65054 | 25.15092 | -0.48954 | 0.193381894 | 0.439413908 |
| 5517.912 | 6234.356 | 6476.361 | -0.12289 | 0.985442377 | 0.49318083  |
| 1412.535 | 1390.677 | 1235.539 | 0.071456 | 0.617661583 | 0.703889775 |
| 432.427  | 500.7179 | 368.8801 | 0.186351 | 0.969607454 | 0.563707226 |
| 2650.849 | 2646.652 | 2642.942 | 0.222539 | 0.976681492 | 0.0969577   |
| 1094.469 | 1020.944 | 933.7278 | 0.092279 | 0.732140966 | 0.681964737 |
| 746.026  | 723.6721 | 673.835  | -0.01381 | 0.728930628 | 0.9611653   |
| 54.5001  | 56.66752 | 64.9732  | 0.754873 | 0.905394249 | NA          |
| 556.6158 | 558.3144 | 492.5388 | 0.078175 | 0.883354954 | 0.82472084  |
| 603.9683 | 589.8996 | 532.3611 | 0.043277 | 0.735300868 | 0.875772383 |
| 1635.003 | 1396.251 | 1240.779 | 0.106758 | 0.723128445 | 0.692801718 |
| 688.8455 | 746.8965 | 646.5882 | 0.013751 | 0.976681492 | 0.948353155 |
| 87.55754 | 76.17601 | 101.6516 | -0.34875 | 0.001504449 | 0.296426431 |
| 4943.427 | 5168.821 | 4912.813 | -0.04151 | 0.0444701   | 0.767645401 |
| 1271.371 | 1230.893 | 1249.162 | 0.011266 | 0.752974908 | 0.962161209 |
| 2071.897 | 2008.446 | 2244.719 | 0.028662 | 0.95896821  | 0.908612163 |
| 841.6245 | 814.7117 | 863.5148 | -0.07901 | 0.547164305 | 0.676538655 |
| 778.1899 | 837.9361 | 918.0085 | -0.17897 | 0.85608007  | 0.391432089 |
| 419.9188 | 454.2691 | 435.9492 | 0.01351  | 0.007079262 | 0.974691849 |
| 258.2054 | 300.9881 | 295.5233 | 0.472052 | 0.034700814 | 0.181249192 |
| 898.8049 | 862.0895 | 894.9535 | -0.25078 | 0.730407446 | 0.255231987 |
| 2726.792 | 2640.149 | 2734.114 | 0.104338 | 0.88874568  | 0.556664445 |
| 974.7477 | 869.5213 | 799.5896 | 0.220083 | 0.957987619 | 0.374485512 |
| 5602.789 | 5120.514 | 4710.557 | 0.071922 | 0.028657741 | 0.709370809 |
| 1272.265 | 1276.413 | 1263.834 | -0.30432 | 0.60948547  | 0.0013197   |
| 1631.429 | 1568.111 | 1491.24  | 0.078064 | 0.892614393 | 0.690294956 |
| 586.9929 | 604.7632 | 592.0945 | -0.01766 | 0.817609984 | 0.953867552 |
| 30.3771  | 31.58518 | 55.54161 | -0.98243 | 0.001942358 | 0.016996857 |
| 418.1319 | 423.6129 | 554.3681 | 0.384212 | 0.364654282 | 0.116630357 |
| 150.0986 | 191.369  | 161.3851 | 0.104015 | 0.615439794 | 0.859505388 |
| 3648.826 | 3621.148 | 3613.348 | 0.048596 | 0.532414268 | 0.727797788 |
| 564.6568 | 497.002  | 601.5261 | -0.52339 | 0.001496948 | 0.000330475 |
| 2031.692 | 1863.525 | 2002.642 | 0.15978  | 0.794232621 | 0.394044776 |
| 1953.069 | 1873.744 | 1831.825 | 0.139868 | 0.419992784 | 0.356202781 |
| 493.1812 | 544.3798 | 389.8392 | -0.03373 | 0.671990676 | 0.929586888 |
| 1088.215 | 1153.788 | 1279.553 | -0.3404  | 0.78204194  | 0.002264631 |
| 890.7639 | 871.3793 | 910.6728 | 0.384954 | 0.639085319 | 0.616511903 |
| 645.0668 | 720.8852 | 567.9916 | 0.364417 | 0.998398411 | 0.063099827 |
| 1197.215 | 1359.092 | 1415.787 | -0.15018 | 0.541271961 | 0.420106203 |
| 201.9184 | 189.5111 | 194.9196 | -0.6964  | 0.031833517 | 0.00276038  |

|          |          |          |            |             |             |
|----------|----------|----------|------------|-------------|-------------|
| 704.9275 | 757.1152 | 729.3766 | 0.149172   | 0.828016939 | 0.518514401 |
| 545.8944 | 614.982  | 746.1439 | -0.11119   | 0.969843993 | 0.673302041 |
| 14729.32 | 14639.73 | 15448.95 | -0.00427   | 0.98299578  | 0.985850238 |
| 515.5173 | 559.2434 | 472.6277 | -0.2832    | 0.289670982 | 0.191922609 |
| 334.1482 | 380.8801 | 288.1876 | 0.102198   | 0.029154173 | 0.775889861 |
| 932.7558 | 863.9475 | 946.3033 | -0.04733   | 0.036016203 | 0.847133587 |
| 19.65577 | 29.72722 | 13.62341 | -0.08465   | 0.842190796 | NA          |
| 545.001  | 582.4678 | 637.1566 | -0.3995    | 0.064051876 | 0.021007242 |
| 1467.929 | 1218.816 | 1210.388 | 0.179895   | 0.818107632 | 0.345340904 |
| 2653.529 | 2745.123 | 2856.725 | 0.206621   | 0.017391628 | 0.247256105 |
| 11664.81 | 11551.81 | 10821.18 | -0.10384   | 0.311697167 | 0.392881614 |
| 921.141  | 793.3453 | 785.9662 | 0.20049    | 0.883354954 | 0.40615036  |
| 15946.19 | 15580.78 | 15336.82 | 0.030516   | 0.203841572 | 0.835596295 |
| 339.5088 | 410.6073 | 408.7024 | -0.01118   | 0.365953812 | 0.971161723 |
| 844.3048 | 816.5697 | 848.8435 | -0.01272   | 0.972861407 | 0.962868426 |
| 1195.428 | 1051.601 | 1142.271 | 0.082284   | 0.769710962 | 0.664215073 |
| 106.3199 | 105.9032 | 111.0832 | -0.09547   | 0.638519612 | 0.835596295 |
| 1344.634 | 1302.424 | 1231.347 | -0.05493   | 0.011275313 | 0.810986507 |
| 680.8045 | 588.0417 | 646.5882 | 0.477126   | 0.602909819 | 0.147449754 |
| 850.5589 | 923.4019 | 717.8491 | 0.153932   | 0.174775082 | 0.519070487 |
| 232.2955 | 274.0478 | 325.914  | -0.00715   | 0.825699238 | 0.977734128 |
| 578.0584 | 566.6752 | 494.6347 | 0.331551   | 0.270092699 | 0.050220436 |
| 715.6489 | 640.9933 | 700.0339 | 0.249448   | 0.33210787  | 0.269755378 |
| 1254.396 | 1097.12  | 1362.341 | 0.329168   | 0.271291894 | 0.02960885  |
| 4458.287 | 4120.936 | 3920.399 | 0.153692   | 0.681216827 | 0.519258549 |
| 952.4116 | 926.1888 | 906.481  | 0.265522   | 0.335666342 | 0.124605424 |
| 26028.71 | 25448.36 | 23480.48 | 0.101417   | 0.071245169 | 0.55088846  |
| 14744.51 | 13702.39 | 12675.01 | 0.042458   | 0.283639033 | 0.831580345 |
| 550.3617 | 528.5872 | 466.3399 | 0.171851   | 0.542904501 | 0.51210202  |
| 8722.696 | 8461.111 | 8381.543 | 0.133715   | 0.820906044 | 0.134131676 |
| 2112.996 | 1988.008 | 2068.663 | 0.204117   | 0.564427849 | 0.119008343 |
| 804.9933 | 754.3283 | 763.9591 | 0.050255   | 0.788811844 | 0.835596295 |
| 520.878  | 422.684  | 389.8392 | 0.240154   | 0.827268091 | 0.368584102 |
| 340.4023 | 363.2295 | 383.5515 | -0.10012   | 0.090068897 | 0.753881265 |
| 550.3617 | 613.124  | 600.4782 | 0.108001   | 0.412464172 | 0.573023969 |
| 1199.896 | 1316.359 | 1234.491 | -0.94598   | 0.000288624 | 2.76009E-08 |
| 605.7552 | 698.5898 | 623.5332 | -0.12707   | 0.443017929 | 0.552800466 |
| 9994.961 | 9581.456 | 8552.36  | 0.083933   | 0.394573102 | 0.680886616 |
| 2620.472 | 2718.183 | 2760.313 | -0.13569   | 0.055722587 | 0.326388465 |
| 82.19687 | 82.67884 | 74.4048  | 0.636587   | 0.851080991 | 0.19887348  |
| 2013.823 | 1977.789 | 2180.794 | 0.13078    | 0.986125936 | 0.476290126 |
| 751.3866 | 806.351  | 760.8153 | 0.02124    | 0.183923135 | 0.921848549 |
| 1057.838 | 1190.018 | 1204.1   | -0.08958   | 0.333195304 | 0.642738974 |
| 1.786889 | 0        | 0        | #DIV/0! NA | NA          |             |
| 75.94276 | 63.17035 | 74.4048  | -0.18634   | 0.827268091 | 0.765144842 |
| 172.4347 | 196.9429 | 203.3032 | -0.06667   | 0.787792061 | 0.848456292 |
| 2117.463 | 2074.403 | 2750.882 | -1.41828   | 7.42479E-28 | 3.15448E-31 |
| 381.5007 | 359.5136 | 319.6262 | 0.009184   | 0.955592311 | 0.97680656  |
| 2086.192 | 2167.3   | 2251.007 | -0.0891    | 0.483419188 | 0.608610845 |
| 10231.72 | 9830.422 | 9600.315 | 0.016434   | 0.961125122 | 0.902851746 |
| 343.0826 | 299.1302 | 336.3935 | -0.14046   | 0.701216566 | 0.659338327 |
| 1889.635 | 1771.557 | 2020.457 | -0.09423   | 0.787792061 | 0.643988563 |
| 122.4019 | 89.18167 | 106.8914 | 0.012571   | 0.512542378 | 0.990444813 |
| 2676.759 | 3053.543 | 3069.46  | -0.06733   | 0.398019504 | 0.727522975 |

|          |          |          |          |             |             |
|----------|----------|----------|----------|-------------|-------------|
| 1302.642 | 1309.856 | 1193.621 | 0.19149  | 0.798409569 | 0.178822023 |
| 854.1327 | 728.317  | 802.7334 | 0.5428   | 0.350866676 | 0.000188607 |
| 513.7304 | 471.9197 | 498.8265 | -0.23448 | 0.810901942 | 0.267468464 |
| 3303.063 | 3454.861 | 3596.581 | 0.044603 | 0.844410461 | 0.784199388 |
| 650.4274 | 726.459  | 619.3413 | -0.04727 | 0.145698843 | 0.875604624 |
| 4837.107 | 4773.077 | 4646.632 | -0.03982 | 0.177527106 | 0.818945755 |
| 2810.776 | 2558.399 | 2909.123 | -0.15815 | 0.035877527 | 0.331112797 |
| 11.61478 | 9.289758 | 18.86319 | -0.63007 | 0.218419472 | NA          |
| 334.1482 | 366.0165 | 318.5783 | 0.261912 | 0.936346196 | 0.437727687 |
| 521.7714 | 578.7519 | 500.9224 | 0.287206 | 0.865150494 | 0.099513252 |
| 1148.969 | 1190.018 | 914.8646 | 0.007824 | 0.695990097 | 0.98477285  |
| 17.86889 | 6.50283  | 8.383639 | 0.67993  | 0.731499952 | NA          |
| 3717.622 | 3828.309 | 3923.543 | -0.0766  | 0.004783907 | 0.531682752 |
| 1197.215 | 1039.524 | 1159.038 | 0.08349  | 0.774318005 | 0.680886616 |
| 982.7887 | 969.8507 | 935.8237 | 0.102652 | 0.907134252 | 0.658487105 |
| 61.64765 | 80.82089 | 82.78844 | -0.26697 | 0.296056707 | 0.536500997 |
| 1071.24  | 1092.475 | 1073.106 | 0.10296  | 0.596065856 | 0.620471139 |
| 3980.294 | 3550.545 | 3383.846 | 0.115376 | 0.417487982 | 0.603754605 |
| 3383.473 | 3453.932 | 3147.009 | 0.311575 | 0.121148599 | 0.032632609 |
| 720.1161 | 689.3    | 708.4175 | 0.194206 | 0.365272696 | 0.280613898 |
| 0        | 0        | 0        | #DIV/0!  | NA          | NA          |
| 1251.715 | 1243.899 | 1452.465 | -0.15088 | 0.998398411 | 0.402824474 |
| 1893.208 | 1992.653 | 1581.364 | 0.094161 | 0.324651337 | 0.751339004 |
| 549.4682 | 554.5985 | 505.1143 | 0.051814 | 0.569085135 | 0.821432697 |
| 2096.914 | 1975.002 | 2069.711 | 0.006093 | 0.678868378 | 0.980970686 |
| 839.8376 | 783.1266 | 719.945  | 0.100746 | 0.57058689  | 0.666556565 |
| 3.573777 | 10.21873 | 8.383639 | 0.694824 | NA          | NA          |
| 1270.478 | 1178.87  | 1078.346 | 0.312071 | 0.415765665 | 0.29075107  |
| 3664.908 | 3780.002 | 4175.052 | -0.46147 | 0.984089285 | 0.001688143 |
| 1407.175 | 1423.191 | 1445.13  | -0.28384 | 0.992476114 | 0.004814724 |
| 8.934443 | 12.07668 | 16.76728 | -0.27747 | 0.756107114 | NA          |
| 91.13131 | 103.1163 | 125.7546 | -0.17425 | 0.020548676 | 0.713308089 |
| 1730.602 | 1777.131 | 1891.559 | 0.016227 | 0.53298351  | 0.929442227 |
| 1557.273 | 1517.017 | 1636.906 | -0.05661 | 0.262947776 | 0.771436828 |
| 2737.513 | 2821.299 | 3084.131 | -0.01573 | 0.659336928 | 0.931542231 |
| 2867.063 | 2723.757 | 2848.341 | -0.13802 | 0.038048538 | 0.33000998  |
| 363.6318 | 338.1472 | 334.2976 | -0.2184  | 0.192384879 | 0.34361128  |
| 2064.75  | 1928.554 | 2105.341 | -0.10561 | 0.660833087 | 0.620471139 |
| 729.0505 | 702.3057 | 772.3428 | -0.29193 | 0.699465012 | 0.102776029 |
| 788.9113 | 753.3993 | 792.2539 | 0.159911 | 0.670504707 | 0.402824474 |
| 130.4429 | 140.2753 | 177.1044 | -0.02856 | 0.548982934 | 0.952588397 |
| 271.6071 | 312.1359 | 289.2356 | 0.029518 | 0.831928191 | 0.948353155 |
| 797.8457 | 766.405  | 747.1918 | 0.018574 | 0.716063981 | 0.951973804 |
| 1157.904 | 1172.367 | 1083.585 | 0.281323 | 0.296333484 | 0.171950723 |
| 2577.587 | 2511.021 | 2529.763 | -0.06646 | 0.127584376 | 0.658757039 |
| 3591.646 | 3508.741 | 3379.655 | 0.129458 | 0.986203512 | 0.303336182 |
| 475.3123 | 444.0504 | 433.8533 | -0.04817 | 0.368034878 | 0.87466351  |
| 1257.97  | 1263.407 | 1307.848 | -0.22331 | 0.46429351  | 0.149957196 |
| 4.467221 | 9.289758 | 6.287729 | -0.72089 | 0.701216566 | NA          |
| 293.9432 | 331.6443 | 388.7913 | -0.04689 | 0.827268091 | 0.869372302 |
| 1785.102 | 1788.278 | 1615.946 | 0.178425 | 0.497319548 | 0.414929365 |
| 456.55   | 431.9737 | 445.3808 | -0.26635 | 0.212716004 | 0.328024792 |
| 185.8364 | 206.2326 | 303.9069 | 0.263073 | 0.28287487  | 0.49413501  |
| 13054.11 | 13286.21 | 11841.89 | 0.095473 | 0.043196135 | 0.601242135 |



|          |          |          |          |             |             |
|----------|----------|----------|----------|-------------|-------------|
| 770.149  | 884.3849 | 788.0621 | -0.178   | 0.735300868 | 0.439570865 |
| 3003.76  | 3230.049 | 2969.904 | 0.034862 | 0.988049891 | 0.818645356 |
| 2589.201 | 2631.788 | 2658.662 | -0.21636 | 0.577926236 | 0.253693985 |
| 792.4851 | 836.0782 | 978.7899 | -0.058   | 0.651388825 | 0.875604624 |
| 241.2299 | 247.1076 | 202.2553 | 0.307173 | 0.867587609 | 0.382319285 |
| 143.8445 | 181.1503 | 222.1664 | 0.094752 | 0.393551305 | 0.822050288 |
| 3496.047 | 3464.151 | 3366.031 | 0.009022 | 0.562962798 | 0.969186716 |
| 523.5583 | 480.2805 | 464.244  | 0.152367 | 0.947669058 | 0.422560599 |
| 806.7802 | 857.4446 | 819.5007 | -0.12817 | 0.940969382 | 0.566141749 |
| 374.3531 | 392.9567 | 448.5247 | -0.04237 | 0.112147069 | 0.895438079 |
| 1962.004 | 2095.769 | 2211.185 | -0.15213 | 0.327964932 | 0.23616229  |
| 125.9756 | 149.5651 | 144.6178 | -0.45146 | 0.236209282 | 0.128202832 |
| 12543.06 | 12302.43 | 14059.36 | -0.02446 | 0.645124304 | 0.901090975 |
| 1500.986 | 1558.821 | 1601.275 | -0.03992 | 0.769710962 | 0.864252513 |
| 1093.576 | 1061.819 | 1045.859 | -0.07805 | 0.371964696 | 0.676897688 |
| 323.4268 | 315.8518 | 307.0508 | -0.04596 | 0.745767703 | 0.872379241 |
| 244.8037 | 266.616  | 225.3103 | -0.12704 | 0.579932002 | 0.702040936 |
| 1291.027 | 1281.987 | 1247.066 | 0.287088 | 0.587719544 | 0.087007219 |
| 75.94276 | 105.9032 | 86.98026 | -0.05714 | 0.117208522 | 0.923725803 |
| 2863.489 | 2759.058 | 2609.408 | -0.02525 | 0.033849408 | 0.875772383 |
| 808.5671 | 837.9361 | 823.6925 | -0.0567  | 0.990604058 | 0.775439768 |
| 1098.043 | 1095.262 | 1161.134 | -0.09602 | 0.772576047 | 0.672730781 |
| 3189.596 | 3368.466 | 2964.664 | 0.112998 | 0.444589889 | 0.41049793  |
| 1372.33  | 1536.526 | 1345.574 | 0.115967 | 0.17246068  | 0.639154099 |
| 1859.258 | 1767.841 | 1751.133 | 0.13366  | 0.162464449 | 0.44710318  |
| 952.4116 | 1001.436 | 1024.9   | -0.06643 | 0.855484931 | 0.772033634 |
| 8.040998 | 7.431806 | 6.287729 | 0.226514 | 0.076086967 | NA          |
| 29.48366 | 27.86927 | 52.39774 | -0.02815 | 0.729364673 | 0.957070324 |
| 5934.257 | 6228.782 | 6258.387 | -0.04893 | 0.872688807 | 0.797601985 |
| 2510.578 | 2689.385 | 2675.429 | -0.08541 | 0.428038739 | 0.603217016 |
| 497.6485 | 601.9763 | 527.1213 | 0.146626 | 0.962660515 | 0.493837083 |
| 1310.683 | 1446.415 | 1486     | -0.02381 | 0.925203985 | 0.908727843 |
| 301.9842 | 267.545  | 398.2229 | -0.23677 | 0.986203512 | 0.402824474 |
| 1408.962 | 1384.174 | 1571.932 | -0.0109  | 0.490813332 | 0.957489272 |
| 3404.023 | 3664.809 | 3641.643 | -0.02275 | 0.45171569  | 0.899731862 |
| 1470.609 | 1432.481 | 1258.594 | 0.387293 | 0.025688649 | 0.167499635 |
| 1507.24  | 1526.307 | 1834.969 | -0.3102  | 0.473487587 | 0.058966813 |
| 3202.998 | 3216.114 | 3052.693 | -0.2364  | 0.003208611 | 0.018001949 |
| 1299.961 | 1214.171 | 1221.915 | 0.050916 | 0.899176451 | 0.826468162 |
| 1804.757 | 2005.659 | 1930.333 | -0.01607 | 0.618280897 | 0.952680272 |
| 4598.558 | 4308.59  | 3740.151 | 0.220529 | 0.668230752 | 0.267586812 |
| 1248.142 | 1343.299 | 1433.602 | -0.02093 | 0.429631603 | 0.923725803 |
| 803.2064 | 762.6891 | 729.3766 | 0.164523 | 0.62292707  | 0.59816002  |
| 1275.838 | 1307.998 | 1373.869 | -0.38172 | 0.07881338  | 0.000782831 |
| 958.6657 | 977.2825 | 1154.846 | -0.06676 | 0.425337875 | 0.763346604 |
| 263.5661 | 261.9712 | 285.0437 | 0.005233 | 0.000567925 | 0.985001162 |
| 123.2953 | 129.1276 | 130.9944 | -0.00516 | 0.89036901  | 0.981434865 |
| 7186.866 | 6814.037 | 6205.989 | 0.054962 | 0.288546176 | 0.808870475 |
| 145.6314 | 137.4884 | 173.9605 | -0.16087 | 0.020628498 | 0.723437511 |
| 1426.83  | 1485.432 | 1383.3   | 0.04363  | 0.410903637 | 0.814809717 |
| 3991.909 | 4072.63  | 3577.718 | 0.114677 | 0.485973657 | 0.505302546 |
| 350.2301 | 393.8857 | 341.6333 | -0.15341 | 0.602427087 | 0.519258549 |
| 749.5997 | 778.4817 | 799.5896 | -0.06539 | 0.441361968 | 0.751940308 |
| 488.714  | 473.7776 | 536.5529 | 0.306827 | 0.006229103 | 0.207278086 |

|          |          |          |          |             |             |
|----------|----------|----------|----------|-------------|-------------|
| 273.3939 | 281.4797 | 343.7292 | -0.09552 | 0.500344775 | 0.726460865 |
| 2703.562 | 2776.709 | 3043.261 | -0.0524  | 0.382918803 | 0.784199388 |
| 1579.609 | 1557.892 | 1892.607 | 0.062931 | 0.566548852 | 0.786706509 |
| 6665.988 | 7143.824 | 7270.711 | -0.33593 | 0.378784486 | 0.002779203 |
| 35.73777 | 21.36644 | 26.19887 | -0.40341 | 0.769710962 | NA          |
| 1375.011 | 1469.64  | 1279.553 | 0.206284 | 0.935611683 | 0.358153185 |
| 3657.761 | 3522.676 | 3670.986 | 0.224198 | 0.705615772 | 0.045330931 |
| 665.616  | 634.4904 | 584.7588 | 0.046412 | 0.991136341 | 0.884584155 |
| 789.8047 | 775.6948 | 751.3837 | -0.38887 | 0.000710235 | 0.034978732 |
| 2914.415 | 2860.316 | 3386.99  | -0.45904 | 0.83213076  | 8.91351E-05 |
| 92.9182  | 93.82655 | 101.6516 | 0.363291 | 0.136084466 | 0.356068164 |
| 173.3282 | 170.0026 | 197.0155 | -0.13869 | 0.795709704 | 0.634014533 |
| 648.6405 | 588.0417 | 606.7659 | -0.11975 | 0.934554042 | 0.601858923 |
| 568.2305 | 661.4307 | 666.4993 | 0.073802 | 0.087280745 | 0.800339699 |
| 445.8287 | 428.2578 | 377.2638 | 0.453394 | 0.226021964 | 0.057894023 |
| 828.2228 | 940.1235 | 777.5825 | -0.14837 | 0.02453229  | 0.462978863 |
| 480.673  | 434.7607 | 478.9154 | 0.452857 | 0.985859213 | 0.017695039 |
| 6942.062 | 6839.12  | 6575.917 | 0.073468 | 0.139873727 | 0.524211956 |
| 229.6152 | 244.3206 | 291.3315 | -0.3812  | 0.957754117 | 0.114544408 |
| 2178.217 | 2418.124 | 2315.98  | 0.042436 | 0.220715145 | 0.832900164 |
| 69.68865 | 101.2584 | 88.02821 | -0.23242 | 0.804201321 | 0.660222897 |
| 747.8128 | 805.422  | 1075.202 | -0.59298 | 0.451991382 | 0.000232021 |
| 1475.076 | 1377.671 | 1436.746 | 0.031589 | 0.352663598 | 0.872582499 |
| 1143.609 | 1109.197 | 1149.607 | -0.01513 | 0.270719269 | 0.931618549 |
| 1914.651 | 1919.264 | 1960.724 | -0.02484 | 0.847532334 | 0.907473183 |
| 1140.928 | 1111.984 | 933.7278 | 0.050447 | 0.893366537 | 0.845206982 |
| 3092.211 | 3122.288 | 3265.427 | -0.13791 | 0.847714103 | 0.386225298 |
| 1420.576 | 1478     | 1341.382 | 0.150057 | 0.848694292 | 0.386078627 |
| 167.9675 | 180.2213 | 191.7757 | 0.343088 | 0.120606425 | 0.253693985 |
| 902.3787 | 946.6263 | 986.1256 | -0.15127 | 0.909569287 | 0.361214706 |
| 187.6233 | 181.1503 | 176.0564 | 0.407054 | 0.812875146 | 0.128665301 |
| 7680.94  | 6811.25  | 7319.965 | 0.350349 | 0.700017119 | 0.015466264 |
| 395.7958 | 413.3942 | 429.6615 | -0.29312 | 0.14853364  | 0.076809757 |
| 6150.47  | 6226.925 | 6135.776 | 0.008425 | 0.792868376 | 0.953867552 |
| 5.360666 | 7.431806 | 15.71932 | -0.38364 | 0.7406684   | NA          |
| 17171.11 | 16925.01 | 16387.92 | 0.024012 | 0.432073195 | 0.875604624 |
| 930.9689 | 1103.623 | 842.5557 | 0.083871 | 0.507065266 | 0.722021255 |
| 975.6411 | 883.4559 | 740.9041 | 0.309151 | 0.68164261  | 0.167499635 |
| 1785.995 | 1680.517 | 1515.343 | 0.095155 | 0.861070915 | 0.656460739 |
| 4326.951 | 4655.098 | 4112.175 | 0.136437 | 0.868137167 | 0.442485492 |
| 2075.471 | 2048.392 | 2065.519 | 0.03379  | 0.469347309 | 0.864363898 |
| 52.71321 | 72.46011 | 97.45981 | 0.087053 | 0.603004299 | 0.905975684 |
| 816.6081 | 969.8507 | 1009.181 | -0.3049  | 0.880647749 | 0.066700944 |
| 4540.484 | 4224.053 | 4486.295 | -0.11367 | 0.527593235 | 0.394044776 |
| 1.786889 | 0.928976 | 1.047955 | #DIV/0!  | NA          | NA          |
| 1785.102 | 1733.469 | 1816.106 | -0.038   | 0.455280748 | 0.827790925 |
| 27.69677 | 12.07668 | 2.09591  | -0.56552 | 0.739610643 | 0.583691606 |
| 1689.503 | 1682.375 | 2023.601 | -0.26091 | 0.191527971 | 0.067405031 |
| 425.2795 | 491.4282 | 512.4499 | 0.165915 | 0.835449534 | 0.420787436 |
| 332.3613 | 336.2892 | 354.2088 | 0.118494 | 0.981637588 | 0.685537269 |
| 3666.695 | 3777.215 | 3801.98  | -0.63066 | 0.000195297 | 2.34866E-13 |
| 3483.539 | 3662.022 | 3244.468 | 0.009084 | 0.168909978 | 0.962321489 |
| 2743.767 | 2508.235 | 2547.578 | 0.091702 | 0.617661583 | 0.486646679 |
| 3067.194 | 3032.177 | 3533.704 | 0.331352 | 0.29215357  | 0.018058475 |

|          |          |          |          |                |             |
|----------|----------|----------|----------|----------------|-------------|
| 301.9842 | 243.3916 | 234.7419 | 0.174716 | 0.872095034    | 0.612005134 |
| 261.7792 | 292.6274 | 278.756  | -0.14048 | 0.079950184    | 0.692421497 |
| 1126.633 | 1195.592 | 1174.757 | -0.17083 | 0.587719544    | 0.280613898 |
| 1982.553 | 2017.735 | 2181.842 | 0.245475 | 0.207483701    | 0.10424789  |
| 1157.904 | 1228.106 | 1242.875 | 0.321708 | 0.977048368    | 0.046054594 |
| 77.72965 | 81.74987 | 106.8914 | -0.12612 | 0.925116667    | 0.840777068 |
| 2094.233 | 2382.823 | 1968.059 | 0.223142 | 0.474981124    | 0.207615914 |
| 2625.833 | 3088.844 | 2742.498 | 0.158832 | 0.784378477    | 0.256199693 |
| 7317.308 | 6986.827 | 6442.827 | 0.074655 | 0.243530103    | 0.688084851 |
| 998.8707 | 1057.174 | 1034.331 | 0.053427 | 0.987989692    | 0.774230303 |
| 913.9935 | 903.8934 | 956.7828 | 0.165894 | 0.235856061    | 0.495076977 |
| 1251.715 | 1176.083 | 1064.722 | 0.038559 | 0.18279362     | 0.859505388 |
| 2457.865 | 2435.774 | 2439.639 | -0.28142 | 0.427251895    | 0.025807779 |
| 2890.292 | 3054.472 | 2905.979 | -0.18474 | 0.839922799    | 0.281445446 |
| 5240.051 | 4959.802 | 4882.422 | -0.08352 | 0.307348283    | 0.531682752 |
| 329.6809 | 407.8204 | 354.2088 | 0.143263 | 0.804410815    | 0.658487105 |
| 1937.881 | 1876.531 | 2094.862 | -0.51733 | 0.004455063    | 1.28535E-07 |
| 1233.847 | 1227.177 | 1326.711 | -0.15975 | 0.394443433    | 0.27042216  |
| 1998.635 | 1977.789 | 1974.347 | -0.12324 | 0.752974908    | 0.545627423 |
| 4397.533 | 4244.49  | 4067.113 | 0.16558  | 0.542904501    | 0.361214706 |
| 519.9846 | 628.9166 | 667.5473 | -0.0403  | 0.07582841     | 0.887845961 |
| 279.6481 | 183.9372 | 219.0226 | -0.07807 | 0.792868376    | 0.859505388 |
| 46.4591  | 31.58518 | 59.73343 | -0.45964 | 0.814880408 NA |             |
| 718.3292 | 657.7148 | 687.4584 | 0.132187 | 0.728166455    | 0.592123352 |
| 83.98376 | 58.52547 | 93.26799 | 0.34709  | 0.4069354      | 0.515558505 |
| 1741.323 | 1642.429 | 1780.475 | 0.047241 | 0.110895942    | 0.791888862 |
| 476.2058 | 526.7293 | 565.8956 | -0.15441 | 0.73478662     | 0.572103667 |
| 1863.725 | 1707.457 | 1747.989 | 0.206826 | 0.223826825    | 0.305200742 |
| 424.386  | 441.2635 | 410.7983 | 0.13015  | 0.960773888    | 0.617995918 |
| 2640.128 | 2702.39  | 2913.315 | -0.21627 | 0.310443697    | 0.099245982 |
| 1933.413 | 1963.855 | 1706.071 | 0.205395 | 0.825592309    | 0.266809788 |
| 2307.767 | 2376.32  | 2232.144 | 0.075017 | 0.27810082     | 0.66000496  |
| 803.2064 | 761.7601 | 725.1848 | -0.04201 | 0.281045561    | 0.84551374  |
| 768.3621 | 842.581  | 819.5007 | 0.009838 | 0.27470085     | 0.97680656  |
| 48.24599 | 45.51981 | 38.77433 | -0.08499 | 0.835764764    | 0.919055186 |
| 257.3119 | 250.8235 | 238.9337 | 0.039057 | 0.582750031    | 0.915422831 |
| 4918.411 | 5061.06  | 5978.583 | -0.40541 | 0.813154117    | 0.00622934  |
| 632.5585 | 659.5728 | 656.0198 | 0.055895 | 0.759261525    | 0.775439768 |
| 684.3783 | 601.0473 | 534.457  | -0.0196  | 0.592795512    | 0.945029596 |
| 146.5249 | 180.2213 | 145.6657 | 0.064165 | 0.614563272    | 0.904467867 |
| 2230.037 | 2275.062 | 2487.845 | -0.01868 | 0.174775082    | 0.929723758 |
| 4970.23  | 4828.816 | 5382.296 | 0.013732 | 0.830173942    | 0.939512313 |
| 34.84433 | 22.29542 | 26.19887 | -0.63016 | 0.828690815 NA |             |
| 36.63121 | 14.86361 | 32.4866  | -0.24273 | 0.549071806    | 0.741001187 |
| 672.7635 | 887.1719 | 643.4443 | 0.068932 | 0.302352413    | 0.814086627 |
| 727.2636 | 752.4704 | 656.0198 | 0.142338 | 0.142424892    | 0.577160388 |
| 598.6077 | 554.5985 | 572.1834 | -0.04236 | 0.518546793    | 0.881988452 |
| 310.9186 | 300.9881 | 433.8533 | 0.148595 | 0.756303962    | 0.636020697 |
| 504.796  | 522.0844 | 561.7038 | -0.03625 | 0.208221128    | 0.910820584 |
| 8364.425 | 8450.893 | 9111.968 | -0.20453 | 0.535516871    | 0.054239832 |
| 1869.085 | 1772.486 | 1987.97  | 0.001894 | 0.973922065    | 0.992528568 |
| 2221.996 | 2270.417 | 1996.354 | 0.168394 | 0.709818881    | 0.302912952 |
| 687.0586 | 683.7262 | 733.5684 | -0.11237 | 0.818647954    | 0.507147953 |
| 1703.798 | 1648.932 | 1663.104 | 0.148094 | 0.359465113    | 0.381794066 |

|          |          |          |          |             |             |
|----------|----------|----------|----------|-------------|-------------|
| 1614.454 | 1748.332 | 1661.009 | 0.091065 | 0.430461737 | 0.600511462 |
| 239.4431 | 270.3319 | 280.8519 | -0.49051 | 0.760895174 | 0.092469287 |
| 16527.83 | 16324.89 | 15413.32 | 0.176644 | 0.240910061 | 0.095730045 |
| 436.8942 | 438.4766 | 389.8392 | 0.089629 | 0.969843993 | 0.753881265 |
| 1635.896 | 1641.5   | 1534.206 | 0.199383 | 0.197390524 | 0.265058952 |
| 2830.431 | 2834.305 | 2988.767 | -0.16591 | 0.898465596 | 0.501883079 |
| 1944.135 | 2118.065 | 2187.082 | -0.3123  | 0.004522157 | 0.017040072 |
| 1012.272 | 1050.672 | 1361.293 | -0.27424 | 0.770381061 | 0.21158075  |
| 290.3694 | 250.8235 | 272.4683 | -0.0804  | 0.694854991 | 0.81402952  |
| 1212.404 | 1205.811 | 1146.463 | 0.206097 | 0.44898062  | 0.323503842 |
| 461.0172 | 510.0077 | 595.2384 | -0.16283 | 0.30299466  | 0.509206637 |
| 5081.911 | 4914.282 | 4336.437 | 0.245165 | 0.038021746 | 0.255165763 |
| 771.0424 | 744.1096 | 873.9944 | -0.23405 | 4.67312E-09 | 0.38666632  |
| 22250.34 | 21532.73 | 26309.96 | 0.381904 | 0.423638846 | 0.017404146 |
| 708.5013 | 681.8682 | 658.1157 | 0.116085 | 0.660762726 | 0.544534957 |
| 3697.966 | 3602.568 | 3800.932 | -0.32489 | 0.145034314 | 0.010351567 |
| 11.61478 | 5.573855 | 1.047955 | 1.693728 | 0.892240442 | NA          |
| 835.3704 | 720.8852 | 629.8209 | 0.352733 | 0.730407446 | 0.227305931 |
| 1148.969 | 1026.518 | 884.4739 | 0.005087 | 0.550533949 | 0.984451848 |
| 3236.949 | 3023.816 | 3109.282 | -0.13238 | 0.994145678 | 0.317595626 |
| 537.8534 | 655.8569 | 665.4514 | -0.46945 | 0.054140788 | 0.004349123 |
| 679.0176 | 704.1636 | 575.3272 | 0.448909 | 0.621884159 | 0.14738752  |
| 25.01644 | 25.08235 | 24.10296 | 0.491117 | 0.272100977 | NA          |
| 180.4757 | 165.3577 | 164.5289 | -0.06005 | 0.312335761 | 0.856558496 |
| 2583.841 | 2562.115 | 2337.987 | -0.34077 | 0.187777748 | 0.001137309 |
| 1349.994 | 1354.447 | 1216.676 | 0.081768 | 0.325572594 | 0.708273109 |
| 276.9677 | 284.2666 | 328.0099 | 0.042535 | 0.434274199 | 0.932794989 |
| 1.786889 | 4.644879 | 14.67137 | 1.526786 | NA          | NA          |
| 3353.99  | 3387.046 | 3302.106 | -0.16571 | 0.066264238 | 0.144747451 |
| 874.6819 | 961.4899 | 958.8787 | 0.134989 | 0.671378444 | 0.442655501 |
| 881.8295 | 880.669  | 734.6164 | -0.04712 | 0.886112674 | 0.858316687 |
| 3066.301 | 2908.623 | 3087.275 | 0.323628 | 0.000183667 | 0.032265541 |
| 0        | 2.786927 | 1.047955 | #DIV/0!  | NA          | NA          |
| 2.680333 | 0.928976 | 5.239774 | -0.46593 | 0.902516624 | NA          |
| 17212.2  | 17108.02 | 18343.4  | -0.19308 | 0.940969382 | 0.229480039 |
| 316.2793 | 308.42   | 334.2976 | 0.06018  | 0.936346196 | 0.841212475 |
| 102.7461 | 133.7725 | 138.33   | 0.263639 | 0.576828718 | 0.601858923 |
| 4322.483 | 4283.507 | 5038.567 | 0.086258 | 0.780212598 | 0.697774046 |
| 3244.99  | 3250.486 | 3803.028 | -0.27478 | 0.368085564 | 0.112687221 |
| 1410.748 | 1454.776 | 1570.884 | -0.31785 | 0.795811864 | 0.085100563 |
| 828.2228 | 837.0072 | 861.4189 | 1.16E-05 | 0.898465596 | 0.996992829 |
| 201.9184 | 234.1019 | 253.6051 | -0.03827 | 0.210289554 | 0.924858067 |
| 688.8455 | 761.7601 | 803.7814 | -0.02023 | 0.834965572 | 0.94960537  |
| 0        | 4.644879 | 0        | -0.37096 | 0.868785389 | NA          |
| 707.6079 | 668.8625 | 570.0875 | 0.322165 | 0.314879449 | 0.060851524 |
| 822.8622 | 827.7174 | 949.4471 | -0.1425  | 0.520961145 | 0.627247952 |
| 646.8536 | 672.5785 | 530.2652 | 0.073609 | 0.425091186 | 0.781285519 |
| 1267.797 | 1294.992 | 1351.862 | 0.01391  | 0.948896953 | 0.948371294 |
| 179.5823 | 153.281  | 219.0226 | -0.12058 | 0.00758806  | 0.79799583  |
| 2905.481 | 2892.831 | 3177.399 | -0.10736 | 0.430461737 | 0.39276575  |
| 655.7881 | 586.1837 | 743      | 0.232143 | 0.730407446 | 0.277548691 |
| 2280.07  | 2253.695 | 2692.196 | 0.002198 | 0.558928437 | 0.996992829 |
| 3783.736 | 3953.721 | 4737.804 | -0.2485  | 0.820742844 | 0.148566635 |
| 1060.518 | 1142.64  | 1109.784 | -0.0408  | 0.394573102 | 0.871061917 |

|          |          |          |          |                |             |
|----------|----------|----------|----------|----------------|-------------|
| 927.3951 | 897.3906 | 731.4725 | 0.1542   | 0.344730624    | 0.477288843 |
| 382.3941 | 377.1642 | 422.3258 | 0.053991 | 0.577578732    | 0.84002392  |
| 13116.66 | 12945.28 | 11255.04 | -0.05983 | 0.158538481    | 0.80286002  |
| 503.9026 | 510.9367 | 614.1016 | -0.16068 | 0.596065856    | 0.515285838 |
| 740.6653 | 732.9619 | 757.6714 | 0.112403 | 0.443017929    | 0.599924988 |
| 174.2216 | 189.5111 | 259.8928 | -0.35494 | 0.701216566    | 0.316260034 |
| 91.13131 | 127.2697 | 130.9944 | 0.001539 | 0.976681492    | 0.99985654  |
| 705.821  | 600.1183 | 602.5741 | -0.09398 | 0.837529432    | 0.751464759 |
| 809.4605 | 750.6124 | 739.8562 | 0.005968 | 0.847410002    | 0.984451848 |
| 941.6902 | 1113.842 | 1084.633 | -0.30305 | 0.417038094    | 0.017912698 |
| 1892.315 | 1943.417 | 1870.599 | 0.071436 | 0.837529432    | 0.679633204 |
| 2453.398 | 2393.971 | 2413.44  | -0.10823 | 0.901380807    | 0.468800279 |
| 1513.495 | 1499.367 | 1484.952 | 0.133148 | 0.066028159    | 0.48662881  |
| 1963.79  | 1976.86  | 2124.205 | -0.02389 | 0.986203512    | 0.91372954  |
| 636.1323 | 759.9022 | 788.0621 | -0.27043 | 0.976681492    | 0.109765004 |
| 13278.37 | 12870.03 | 12835.35 | -0.09369 | 0.556706854    | 0.468899388 |
| 1404.494 | 1540.242 | 1480.76  | 0.005556 | 0.496884574    | 0.978507567 |
| 2052.241 | 2025.167 | 2181.842 | -0.05836 | 0.825592309    | 0.761486667 |
| 848.772  | 914.1121 | 835.2201 | 0.154382 | 0.976681492    | 0.457073409 |
| 2491.816 | 2401.402 | 2206.993 | 0.096073 | 0.759261525    | 0.571284382 |
| 6381.872 | 6265.013 | 5792.047 | 0.124103 | 0.189629036    | 0.472093197 |
| 588.7798 | 565.7462 | 619.3413 | -0.07201 | 0.716063981    | 0.756407952 |
| 549.4682 | 621.4848 | 498.8265 | 0.146987 | 0.87773756     | 0.556052555 |
| 12691.38 | 12317.29 | 11774.82 | -0.02354 | 0.017639055    | 0.883280306 |
| 756.7473 | 749.6834 | 648.6841 | 0.248732 | 0.875830579    | 0.303824089 |
| 521.7714 | 648.4251 | 498.8265 | 0.03383  | 0.853320493    | 0.905168779 |
| 115.2543 | 115.193  | 155.0973 | 0.249976 | 0.04017813     | 0.600553967 |
| 469.0582 | 525.8003 | 519.7856 | -0.11494 | 0.010982999    | 0.630318178 |
| 1833.348 | 1786.42  | 1724.934 | 0.099532 | 0.549071806    | 0.511081603 |
| 867.5344 | 967.0638 | 1112.928 | -0.32137 | 0.272597363    | 0.210822498 |
| 2191.619 | 2186.809 | 1850.688 | 0.215095 | 0.584494617    | 0.216876753 |
| 835.3704 | 745.0386 | 674.883  | 0.215361 | 0.74589429     | 0.315911601 |
| 1838.708 | 1903.471 | 1820.298 | 0.110073 | 0.985859213    | 0.441429894 |
| 2037.053 | 2154.295 | 2184.986 | -0.00097 | 0.09014688     | 0.999675887 |
| 869.3213 | 856.5157 | 783.8703 | -0.01405 | 0.944990108    | 0.9614279   |
| 2498.07  | 2330.8   | 2064.471 | 0.25911  | 0.313396084    | 0.267586812 |
| 1259.756 | 1213.242 | 1089.873 | -0.11911 | 0.206702304    | 0.560116425 |
| 185.8364 | 259.1842 | 209.591  | -0.33222 | 0.104651539    | 0.230651936 |
| 1300.855 | 1307.998 | 976.694  | 0.19925  | 0.379509905    | 0.419308591 |
| 824.6491 | 937.3365 | 952.591  | -0.29852 | 0.623663103    | 0.024919247 |
| 1149.863 | 1136.137 | 994.5092 | -0.07386 | 0.001833424    | 0.751339004 |
| 877.3623 | 764.5471 | 945.2553 | -0.01492 | 0.730407446    | 0.967817837 |
| 1230.273 | 1195.592 | 1352.91  | 0.091984 | 0.842806932    | 0.689321642 |
| 1032.822 | 1072.038 | 1244.97  | -0.1266  | 0.911996675    | 0.555053384 |
| 1148.969 | 1181.657 | 1159.038 | 0.157855 | 0.83703582     | 0.300201673 |
| 553.9354 | 521.1554 | 577.4231 | 0.077903 | 0.622518586    | 0.748344041 |
| 1090.895 | 1124.061 | 921.1524 | 0.120783 | 0.173085065    | 0.647261886 |
| 24244.5  | 23208.6  | 22706.04 | 0.147133 | 0.114505424    | 0.13004175  |
| 13778.7  | 13094.84 | 14004.87 | 0.180948 | 0.358649739    | 0.164117766 |
| 23.22955 | 17.65054 | 20.9591  | -0.13877 | 0.395079365 NA |             |
| 4891.607 | 4924.501 | 4783.914 | -0.03189 | 0.854862911    | 0.862462136 |
| 8404.63  | 8198.211 | 8590.086 | -0.24071 | 0.933380146    | 0.005720058 |
| 363.6318 | 362.3005 | 388.7913 | -0.21546 | 0.236875869    | 0.250598589 |
| 610.2224 | 585.2547 | 588.9507 | -0.05854 | 0.095377019    | 0.823966789 |

|          |          |          |          |                |             |
|----------|----------|----------|----------|----------------|-------------|
| 430.6401 | 423.6129 | 329.0578 | 0.105677 | 0.843507519    | 0.748344041 |
| 839.8376 | 780.3396 | 763.9591 | 0.152467 | 0.27810082     | 0.616338723 |
| 1950.389 | 2016.806 | 2003.69  | -0.07601 | 0.843507519    | 0.680262772 |
| 2415.873 | 2241.619 | 2485.749 | 0.01228  | 0.175067813    | 0.945029596 |
| 1847.643 | 1958.281 | 1967.011 | 0.03442  | 0.732140966    | 0.84572993  |
| 1090.895 | 1114.771 | 1217.724 | -0.11145 | 0.937354907    | 0.536500997 |
| 1028.354 | 1133.35  | 1024.9   | -0.22686 | 0.840099446    | 0.233465653 |
| 1708.265 | 1760.409 | 1925.093 | -0.04837 | 0.652135039    | 0.838122056 |
| 1824.413 | 1715.818 | 2023.601 | -0.00278 | 0.787792061    | 0.990142758 |
| 221.5742 | 205.3036 | 215.8787 | 0.23445  | 0.614621507    | 0.422116695 |
| 309.1317 | 376.2352 | 343.7292 | -0.02247 | 0.962660515    | 0.944445597 |
| 6306.823 | 6247.362 | 7288.526 | -0.39862 | 0.614621507    | 0.004483661 |
| 124.1888 | 156.9969 | 129.9464 | -0.08958 | 0.157331056    | 0.819004    |
| 2286.324 | 2284.351 | 2047.704 | 0.290763 | 0.800609294    | 0.102488637 |
| 285.9022 | 294.4853 | 208.543  | 0.073744 | 0.084559824    | 0.864363898 |
| 359.1646 | 342.7921 | 286.0917 | 0.287134 | 0.37602059     | 0.187388152 |
| 25.01644 | 13.00566 | 24.10296 | 0.011257 | 0.919200531 NA |             |
| 1241.888 | 1348.873 | 1284.793 | -0.08188 | 0.141982581    | 0.643901257 |
| 4731.681 | 4721.984 | 4300.807 | -0.09511 | 0.892614393    | 0.484464564 |
| 787.1244 | 709.7375 | 790.158  | 0.087906 | 0.993501117    | 0.656460739 |
| 964.9198 | 905.7514 | 798.5416 | -0.45112 | 0.988049891    | 0.001957111 |
| 106.3199 | 176.5054 | 123.6587 | -0.33808 | 0.253157581    | 0.367817075 |
| 286.7956 | 357.6557 | 286.0917 | -0.09214 | 0.504054705    | 0.774230303 |
| 898.8049 | 839.7941 | 923.2483 | 0.107843 | 0.987989692    | 0.56192082  |
| 2025.438 | 2033.528 | 2463.742 | -0.07564 | 0.476024675    | 0.723760266 |
| 531.5993 | 606.6212 | 702.1298 | -0.11971 | 0.99650011     | 0.606456502 |
| 9613.46  | 9419.814 | 9466.177 | -0.12539 | 8.51337E-08    | 0.25935495  |
| 3212.826 | 3116.714 | 3220.365 | -0.09003 | 0.796419683    | 0.628282957 |
| 2825.071 | 2860.316 | 2508.804 | 0.270194 | 0.409809283    | 0.264692489 |
| 359.1646 | 334.4313 | 357.3526 | -0.39018 | 0.394573102    | 0.036057439 |
| 1249.035 | 1176.083 | 1244.97  | -0.03548 | 0.476024675    | 0.861107589 |
| 911.3131 | 963.3479 | 869.8026 | -0.21635 | 0.010982999    | 0.175074667 |
| 315.3858 | 352.0818 | 256.7489 | 0.725288 | 0.855484931    | 0.00200924  |
| 30744.31 | 29738.37 | 29091.23 | -0.03871 | 0.826883467    | 0.826468162 |
| 154.5659 | 152.352  | 148.8096 | -0.13078 | 0.989430108    | 0.739592868 |
| 957.7722 | 982.8564 | 1057.386 | 0.031557 | 0.223467289    | 0.885571199 |
| 2204.127 | 2256.482 | 2483.653 | -0.18388 | 0.791218214    | 0.219363336 |
| 419.0254 | 384.596  | 368.8801 | 0.132733 | 0.98843748     | 0.630318178 |
| 401.1565 | 362.3005 | 427.5656 | -0.18269 | 0.887028326    | 0.359873864 |
| 1282.986 | 1131.492 | 1244.97  | 0.136188 | 0.764395772    | 0.598691725 |
| 11327.98 | 11271.26 | 10430.3  | 0.120277 | 0.564057468    | 0.34727798  |
| 2586.521 | 2768.348 | 2626.175 | -0.1729  | 0.854862911    | 0.256269459 |
| 2.680333 | 0        | 0        | -0.91651 | 0.793705768 NA |             |
| 958.6657 | 929.9047 | 950.4951 | -0.04042 | 0.114505424    | 0.838059844 |
| 306.4514 | 310.2779 | 296.5712 | 0.17731  | 0.732140966    | 0.521104798 |
| 700.4603 | 517.4395 | 512.4499 | 0.040878 | 0.182617755    | 0.90980808  |
| 11283.31 | 11403.18 | 10813.85 | 0.054376 | 0.013492234    | 0.680886616 |
| 209.066  | 265.6871 | 250.4612 | -0.57027 | 0.898465596    | 0.002158789 |
| 2132.651 | 2177.519 | 2135.732 | -0.06627 | 0.04129035     | 0.677324798 |
| 1459.888 | 1406.469 | 1634.81  | 0.123854 | 0.978835583    | 0.61283164  |
| 1714.52  | 1786.42  | 1722.838 | 0.07789  | 0.504924333    | 0.679997772 |
| 797.8457 | 687.4421 | 706.3216 | 0.260125 | 0.809173332    | 0.20747063  |
| 1936.094 | 1735.327 | 1785.715 | 0.181419 | 0.526520418    | 0.159639694 |
| 1693.077 | 1686.091 | 1720.742 | -0.19576 | 0.009061203    | 0.112057261 |

|          |          |          |          |             |    |             |
|----------|----------|----------|----------|-------------|----|-------------|
| 32.16399 | 26.9403  | 28.29478 | 0.000712 | 0.530486695 | NA |             |
| 1236.527 | 1151.93  | 1127.599 | 0.338045 | 0.057825057 |    | 0.015498519 |
| 1113.232 | 1029.305 | 969.3583 | 0.165383 | 0.06446805  |    | 0.353465216 |
| 3919.54  | 4099.57  | 4659.207 | -0.22465 | 0.470002734 |    | 0.181446527 |
| 800.5261 | 761.7601 | 668.5952 | 0.286976 | 0.935506037 |    | 0.104692027 |
| 2007.569 | 1918.335 | 1814.01  | 0.10423  | 0.760106856 |    | 0.649685593 |
| 2196.086 | 2136.644 | 2105.341 | 0.002878 | 0.959739969 |    | 0.990023409 |
| 643.2799 | 708.8085 | 903.3371 | -0.18412 | 0.892240442 |    | 0.402023383 |
| 1740.429 | 1752.048 | 1815.058 | 0.132069 | 0.603609787 |    | 0.389799953 |
| 4045.516 | 4139.516 | 3728.624 | 0.072459 | 0.195806907 |    | 0.669576945 |
| 1345.527 | 1296.85  | 1310.992 | -0.28236 | 0.439053322 |    | 0.023570036 |
| 701.3537 | 716.2403 | 695.842  | 0.146203 | 0.80050738  |    | 0.471293277 |
| 710.2882 | 568.5332 | 571.1354 | 0.143767 | 0.92790798  |    | 0.531682752 |
| 885.4033 | 897.3906 | 898.0973 | 0.160004 | 0.527593235 |    | 0.365275241 |
| 3840.917 | 3706.613 | 3712.904 | 0.190286 | 0.901380807 |    | 0.060644712 |
| 4538.697 | 4535.26  | 4609.954 | -0.11092 | 0.019077937 |    | 0.372102023 |
| 889.8705 | 815.6407 | 887.6178 | 0.027309 | 0.681253334 |    | 0.903329758 |
| 0.893444 | 0        | 0        | -0.91651 | NA          |    |             |
| 1077.494 | 1075.754 | 1031.188 | 0.094443 | 0.827268091 |    | 0.648517537 |
| 9.827887 | 22.29542 | 23.05501 | 1.328467 | 0.696515701 | NA |             |
| 841.6245 | 782.1976 | 747.1918 | 0.139748 | 0.78204194  |    | 0.574986893 |
| 1897.676 | 2039.102 | 1908.326 | 0.042033 | 0.853008354 |    | 0.818055883 |
| 636.1323 | 727.388  | 703.1777 | 0.148927 | 0.926873595 |    | 0.578506971 |
| 3135.096 | 3134.364 | 2975.144 | 0.131083 | 0.760924499 |    | 0.306199402 |
| 4190.254 | 4033.613 | 3300.01  | 0.188768 | 0.045913153 |    | 0.505302546 |
| 3045.751 | 2894.688 | 2594.736 | 0.314572 | 0.02597477  |    | 0.174598931 |
| 2.680333 | 6.50283  | 4.19182  | 0.730208 | NA          |    |             |
| 3800.712 | 3751.204 | 4270.416 | -0.30792 | 0.728952588 |    | 0.034584179 |
| 100.0658 | 95.6845  | 85.9323  | 0.218729 | 0.186661493 |    | 0.681857234 |
| 172.4347 | 170.9315 | 141.4739 | -0.20481 | 0.233112258 |    | 0.573023969 |
| 12.50822 | 15.79259 | 28.29478 | -0.1574  | 0.76444128  | NA |             |
| 286.7956 | 361.3716 | 365.7363 | -0.34802 | 0.01992954  |    | 0.201829761 |
| 550.3617 | 644.7092 | 564.8477 | -0.19607 | 0.148672328 |    | 0.361564535 |
| 1432.191 | 1391.606 | 1202.004 | 0.456683 | 0.68563527  |    | 0.021007242 |
| 38.4181  | 78.03396 | 45.06206 | -0.38828 | 0.563351252 |    | 0.505493145 |
| 218.0004 | 221.0962 | 264.0846 | -0.74398 | 0.95291647  |    | 0.000703618 |
| 99.17231 | 105.9032 | 118.4189 | 0.05717  | 0.727477466 |    | 0.908612163 |
| 240.3365 | 267.545  | 227.4062 | -0.03038 | 0.587719544 |    | 0.936008754 |
| 969.387  | 1109.197 | 964.1185 | 0.003454 | 0.724149904 |    | 0.990142758 |
| 28343.63 | 28272.45 | 28948.71 | -1.02864 | 0.690439171 |    | 5.57785E-29 |
| 919.3541 | 897.3906 | 1008.133 | 0.079099 | 0.462276826 |    | 0.753881265 |
| 311.812  | 363.2295 | 312.2906 | 0.16143  | 0.398196147 |    | 0.626416386 |
| 1234.74  | 1340.512 | 1248.114 | -0.11496 | 0.207698921 |    | 0.514958257 |
| 686.1652 | 588.9706 | 600.4782 | -0.01735 | 0.766887678 |    | 0.953132992 |
| 12457.29 | 12438.99 | 12098.64 | 0.466045 | 0.054030267 |    | 8.80507E-07 |
| 1216.871 | 1335.867 | 1198.86  | 0.223319 | 0.968417488 |    | 0.278856737 |
| 842.5179 | 885.3139 | 906.481  | 0.206436 | 0.786476399 |    | 0.192142371 |
| 33.95088 | 28.79825 | 29.34274 | 0.024836 | 0.98843748  | NA |             |
| 2.680333 | 1.857952 | 5.239774 | 0.702943 | 0.295061709 | NA |             |
| 145.6314 | 159.7838 | 141.4739 | 0.293276 | 0.831484164 |    | 0.424955236 |
| 670.0832 | 723.6721 | 732.5205 | 0.070091 | 0.741406787 |    | 0.79799583  |
| 952.4116 | 961.4899 | 880.2821 | 0.150975 | 0.644250773 |    | 0.372550259 |
| 355.5908 | 368.8034 | 407.6545 | 0.138122 | 0.735508761 |    | 0.693887308 |
| 9.827887 | 7.431806 | 11.5275  | 0.531522 | 0.834159161 | NA |             |

|          |          |          |          |             |             |
|----------|----------|----------|----------|-------------|-------------|
| 1483.117 | 1537.455 | 1629.57  | -0.12149 | 0.35165001  | 0.495076977 |
| 3006.44  | 2856.6   | 2883.972 | 0.112238 | 0.098330299 | 0.379367723 |
| 452.9762 | 402.2465 | 438.0451 | -0.18647 | 0.02867794  | 0.375516452 |
| 426.1729 | 414.3232 | 463.1961 | -0.13444 | 0.872654096 | 0.59853578  |
| 1861.938 | 2147.792 | 1955.484 | 0.007901 | 0.577578732 | 0.971161723 |
| 517.3042 | 499.789  | 527.1213 | 0.010777 | 0.882395512 | 0.961026715 |
| 132.2298 | 111.4771 | 111.0832 | 0.413607 | 0.042480283 | 0.303824089 |
| 1544.765 | 1515.159 | 1732.269 | -0.33431 | 0.005683428 | 0.073757535 |
| 708.5013 | 660.5018 | 756.6234 | -0.13103 | 0.80050738  | 0.492537442 |
| 205.4922 | 143.9912 | 198.0635 | 0.158008 | 0.720425175 | 0.685537269 |
| 1813.692 | 1904.4   | 2079.143 | -0.06897 | 0.822851767 | 0.789404047 |
| 737.0915 | 750.6124 | 694.7941 | 0.393229 | 0.317414996 | 0.004483801 |
| 1509.921 | 1319.146 | 1388.54  | 0.059635 | 0.990604058 | 0.732897571 |
| 26154.69 | 24226.76 | 25809.03 | 0.002457 | 0.903271991 | 0.990142758 |
| 808.5671 | 763.6181 | 741.9521 | 0.100343 | 0.945870306 | 0.596499376 |
| 1.786889 | 0        | 1.047955 | -2.44032 | 0.458486853 | NA          |
| 1309.789 | 1257.833 | 1170.566 | 0.04879  | 0.927916216 | 0.835596295 |
| 880.936  | 928.9758 | 913.8167 | 0.140736 | 0.002469991 | 0.394044776 |
| 475.3123 | 484.9253 | 501.9704 | -0.54848 | 0.236209282 | 1.09507E-05 |
| 0        | 8.360782 | 4.19182  | 0.420378 | NA          | NA          |
| 630.7716 | 582.4678 | 634.0127 | 0.013376 | 0.960823113 | 0.976136838 |
| 436.8942 | 461.701  | 463.1961 | -0.283   | 0.66770133  | 0.20379563  |
| 377.0335 | 391.0988 | 438.0451 | 0.048437 | 0.812875146 | 0.875604624 |
| 203.7053 | 191.369  | 257.7969 | -0.05476 | 0.494492788 | 0.896670492 |
| 2193.406 | 2147.792 | 2375.714 | -0.07677 | 0.856745942 | 0.66352118  |
| 364.5253 | 350.2239 | 301.811  | -0.14725 | 0.841901206 | 0.594065295 |
| 2.680333 | 10.21873 | 5.239774 | 0.056489 | NA          | NA          |
| 425.2795 | 419.897  | 445.3808 | -0.03201 | 0.037054401 | 0.91372954  |
| 249.2709 | 362.3005 | 285.0437 | 0.04247  | 0.037913264 | 0.919915102 |
| 771.0424 | 791.4873 | 795.3978 | 0.209625 | 0.373700455 | 0.34519405  |
| 1560.847 | 1508.657 | 1624.33  | -0.24555 | 0.729363614 | 0.092021996 |
| 625.411  | 606.6212 | 684.3145 | 0.099147 | 0.016778454 | 0.725549438 |
| 2314.914 | 2421.84  | 2538.147 | -0.07505 | 0.350490225 | 0.659338327 |
| 7478.128 | 7287.815 | 8381.543 | -0.30839 | 2.46088E-31 | 0.022078636 |
| 1874.446 | 1842.159 | 1868.504 | 0.176298 | 0.412070549 | 0.158921436 |
| 55.39354 | 39.94596 | 62.87729 | 0.331067 | 0.952783825 | NA          |
| 877.3623 | 837.0072 | 869.8026 | 0.033424 | 0.869592661 | 0.864363898 |
| 809.4605 | 810.0669 | 860.371  | -0.03272 | 0.751619042 | 0.872582499 |
| 39.31155 | 18.57952 | 19.91114 | -0.03409 | 0.582750031 | 0.964166603 |
| 899.6984 | 914.1121 | 892.8576 | 0.21665  | 0.972861407 | 0.162129177 |
| 59.86077 | 60.38342 | 74.4048  | -0.06457 | 0.645010824 | 0.945263709 |
| 683.4849 | 647.4961 | 671.7391 | 0.045129 | 0.992511525 | 0.835181175 |
| 1038.182 | 1085.044 | 1017.564 | -0.12126 | 0.484625827 | 0.410479572 |
| 882.7229 | 817.4987 | 929.536  | 0.110276 | 0.730407446 | 0.630318178 |
| 534.2797 | 650.283  | 575.3272 | -0.00444 | 0.626568234 | 0.997083933 |
| 1092.682 | 941.0524 | 846.7476 | 0.183779 | 0.798030968 | 0.468420234 |
| 170.6479 | 207.1616 | 256.7489 | -0.59608 | 0.851080991 | 0.016996857 |
| 2339.037 | 2160.798 | 2044.56  | 0.131585 | 0.249636644 | 0.365253762 |
| 3.573777 | 1.857952 | 2.09591  | -2.14988 | 0.93284858  | NA          |
| 583.4191 | 573.178  | 526.0734 | 0.026602 | 0.91441696  | 0.914949396 |
| 2112.996 | 2208.175 | 2761.361 | -0.51994 | 0.827268091 | 0.001530525 |
| 1524.216 | 1463.137 | 1526.87  | -0.05383 | 0.117208522 | 0.817977011 |
| 1657.339 | 1665.654 | 1671.488 | 0.292446 | 0.579600128 | 0.054060197 |
| 280.5415 | 323.2836 | 276.6601 | -0.02649 | 0.885575053 | 0.946922147 |



|          |          |          |          |             |             |
|----------|----------|----------|----------|-------------|-------------|
| 623.6241 | 756.1863 | 556.464  | 0.186157 | 0.819879878 | 0.477288843 |
| 68.79521 | 54.80957 | 75.45275 | -0.34298 | 0.981023664 | 0.664575474 |
| 134.9101 | 134.7015 | 127.8505 | 0.273458 | 0.000238806 | 0.417522611 |
| 647.7471 | 573.178  | 609.9097 | 0.034481 | 0.976681492 | 0.883471187 |
| 208.1725 | 159.7838 | 228.4542 | -0.41174 | 0.049453408 | 0.149449076 |
| 10791.91 | 10891.31 | 9853.92  | -0.02197 | 0.071548865 | 0.885423648 |
| 3325.4   | 3287.645 | 3521.128 | -0.08951 | 0.310443697 | 0.480764167 |
| 326.1072 | 326.9995 | 320.6742 | 0.237562 | 0.804201321 | 0.550627492 |
| 1547.445 | 1594.122 | 1505.911 | -0.00161 | 0.327341    | 0.996720771 |
| 377.0335 | 376.2352 | 335.3456 | 0.086462 | 0.38025264  | 0.748270161 |
| 109.0002 | 89.18167 | 166.6248 | 0.088654 | 0.752974908 | 0.877477421 |
| 2124.61  | 2038.173 | 2075.999 | 0.355769 | 0.000788705 | 0.000832494 |
| 645.0668 | 630.7745 | 527.1213 | 0.055171 | 0.303314321 | 0.818409186 |
| 577.165  | 445.9084 | 433.8533 | 0.323628 | 0.988049891 | 0.420331471 |
| 1638.577 | 1639.642 | 1462.945 | 0.12351  | 0.98409529  | 0.471293277 |
| 1823.52  | 1909.974 | 1668.344 | 0.209892 | 0.174573346 | 0.361564535 |
| 1348.207 | 1339.583 | 1206.196 | 0.008128 | 0.947037414 | 0.97680656  |
| 42.88532 | 53.88059 | 57.63752 | -0.38627 | 0.761936154 | 0.459373691 |
| 209.9594 | 296.3433 | 318.5783 | 0.015762 | 0.617661583 | 0.974531425 |
| 1320.511 | 1302.424 | 1361.293 | -0.05938 | 0.128466875 | 0.724404377 |
| 39.31155 | 52.95162 | 42.96615 | 0.503065 | 0.928104954 | NA          |
| 680.8045 | 761.7601 | 629.8209 | 0.088338 | 0.872444605 | 0.697184019 |
| 95.59854 | 75.24704 | 93.26799 | -0.18722 | 0.185152106 | 0.689321642 |
| 76.83621 | 96.61348 | 59.73343 | 0.073752 | 0.752974908 | 0.908612163 |
| 519.0911 | 627.9876 | 529.2172 | -0.09479 | 0.248593884 | 0.728985289 |
| 3987.442 | 3986.235 | 4312.334 | 0.018103 | 0.730407446 | 0.921114792 |
| 3442.441 | 3378.685 | 3523.224 | 0.01998  | 0.349551263 | 0.906395988 |
| 559.2961 | 486.7833 | 507.2102 | -0.12422 | 0.126687185 | 0.617517934 |
| 109.0002 | 133.7725 | 115.275  | -0.45194 | 0.922265371 | 0.133640012 |
| 4437.738 | 4556.626 | 4046.154 | -0.03596 | 0.023980578 | 0.825078673 |
| 343.0826 | 446.8373 | 482.0593 | -0.39367 | 0.192723763 | 0.110990341 |
| 1122.166 | 994.0041 | 1110.832 | 0.084773 | 0.774889037 | 0.679997772 |
| 39.31155 | 59.45445 | 23.05501 | -0.80914 | 0.051957782 | 0.193779401 |
| 691.5259 | 705.0926 | 653.9239 | 0.385788 | 0.847532334 | 0.045393537 |
| 8218.794 | 8283.677 | 8518.825 | -0.14528 | 0.861070915 | 0.207154991 |
| 870.2147 | 755.2573 | 820.5487 | 0.067419 | 0.878427603 | 0.804059337 |
| 4748.656 | 4774.006 | 4534.501 | 0.045726 | 0.744600754 | 0.817988115 |
| 622.7306 | 706.0216 | 670.6911 | 0.080624 | 0.476445149 | 0.730853476 |
| 817.5015 | 850.9418 | 919.0564 | -0.53975 | 0.00049622  | 2.72524E-06 |
| 309.1317 | 276.8348 | 341.6333 | -0.5112  | 0.192952947 | 0.063993489 |
| 73.26243 | 76.17601 | 80.69253 | 0.150512 | 0.829098381 | 0.818869867 |
| 3471.924 | 3567.267 | 4231.642 | -0.11179 | 0.87547961  | 0.611282744 |
| 3978.507 | 3869.184 | 4063.969 | 0.502341 | 3.08372E-07 | 0.000660612 |
| 1599.265 | 1674.943 | 1511.151 | 0.193362 | 0.227706608 | 0.152398809 |
| 834.4769 | 876.0241 | 779.6784 | 0.031795 | 0.430461737 | 0.87383525  |
| 20509.91 | 20377.08 | 21716.77 | -0.10404 | 0.92790798  | 0.324570054 |
| 569.124  | 487.7123 | 503.0183 | 0.178998 | 0.848509848 | 0.41069386  |
| 86.66409 | 114.264  | 143.5698 | -0.12989 | 0.149675596 | 0.840777068 |
| 756.7473 | 615.9109 | 617.2454 | -0.02185 | 0.274927458 | 0.94960537  |
| 314.4924 | 384.596  | 322.7701 | 0.240236 | 0.089121906 | 0.380264685 |
| 5038.132 | 5104.722 | 5675.724 | -0.25114 | 0.709602489 | 0.169907253 |
| 467.2713 | 416.1811 | 448.5247 | 0.076319 | 0.981637588 | 0.789143179 |
| 7427.202 | 7248.798 | 6842.098 | 0.08231  | 0.072132871 | 0.656621892 |
| 1277.625 | 1321.004 | 1181.045 | 0.184911 | 0.991136341 | 0.241619328 |

|          |          |          |          |             |             |
|----------|----------|----------|----------|-------------|-------------|
| 64.32799 | 72.46011 | 84.88435 | 0.134304 | 0.035363713 | 0.832900164 |
| 1347.314 | 1350.731 | 1237.635 | 0.164608 | 0.614621507 | 0.398655382 |
| 90.23787 | 105.9032 | 50.30183 | -0.12604 | 0.544702272 | 0.856558496 |
| 687.9521 | 684.6551 | 646.5882 | -0.08468 | 0.450176533 | 0.701843587 |
| 2356.013 | 2203.531 | 2453.262 | -0.31973 | 0.837998472 | 0.139776747 |
| 106.3199 | 83.60782 | 63.92525 | -0.09061 | 0.716459644 | 0.890884082 |
| 663.8291 | 704.1636 | 698.9859 | 0.270843 | 0.140279845 | 0.093593    |
| 13903.78 | 14030.32 | 12770.38 | -0.03859 | 0.136068446 | 0.833950744 |
| 472.632  | 416.1811 | 517.6897 | 0.083075 | 0.88874568  | 0.798420235 |
| 1079.281 | 977.2825 | 963.0705 | 0.159635 | 0.475821599 | 0.361351632 |
| 199.2381 | 205.3036 | 210.6389 | 0.11113  | 0.367802825 | 0.782080618 |
| 276.9677 | 277.7638 | 291.3315 | -0.04667 | 0.223467289 | 0.901090975 |
| 3437.08  | 3239.338 | 3478.162 | -0.29061 | 0.825797061 | 0.002978476 |
| 1363.396 | 1382.316 | 1212.484 | 0.209319 | 0.811082292 | 0.24233535  |
| 3052.006 | 3238.41  | 3049.549 | -0.43071 | 0.004389074 | 2.63712E-07 |
| 353.8039 | 302.8461 | 308.0987 | 0.336718 | 0.215371475 | 0.359290838 |
| 26.80333 | 33.44313 | 63.92525 | 0.300852 | 0.960823113 | NA          |
| 977.428  | 1040.453 | 981.9337 | -0.36654 | 0.17431357  | 0.013172557 |
| 0.893444 | 4.644879 | 1.047955 | -0.26276 | 0.969607454 | NA          |
| 8798.639 | 9064.945 | 8188.72  | 0.058826 | 0.060765203 | 0.71266909  |
| 531.5993 | 553.6696 | 506.1622 | -0.14819 | 0.30979442  | 0.511081603 |
| 295.73   | 311.2069 | 316.4824 | -0.19065 | 0.992476114 | 0.536590083 |
| 440.468  | 459.843  | 422.3258 | -0.05546 | 0.72676049  | 0.818945755 |
| 1088.215 | 941.0524 | 1013.372 | 0.021012 | 0.93585746  | 0.919915102 |
| 1259.756 | 1218.816 | 1020.708 | -0.05479 | 0.78608533  | 0.806564543 |
| 1175.773 | 1127.777 | 1167.422 | -0.02448 | 0.944990108 | 0.892441232 |
| 664.7225 | 752.4704 | 778.6305 | -0.26918 | 0.200422675 | 0.09995667  |
| 59155.84 | 58722.42 | 52143.09 | -0.13142 | 0.553033696 | 0.443898537 |
| 1148.969 | 1173.296 | 978.7899 | 0.264505 | 0.410367179 | 0.240898563 |
| 631.6651 | 649.3541 | 592.0945 | -0.26906 | 0.434274199 | 0.064858857 |
| 330.5744 | 320.4966 | 362.5924 | -0.04642 | 0.936346196 | 0.907473183 |
| 11.61478 | 8.360782 | 4.19182  | -0.14169 | NA          | NA          |
| 263.5661 | 291.6984 | 215.8787 | 0.167306 | 0.842806932 | 0.702040936 |
| 832.69   | 886.2429 | 904.3851 | -0.18272 | 0.226842122 | 0.253751822 |
| 2409.619 | 2246.263 | 2515.092 | -0.54164 | 5.56055E-14 | 6.66086E-08 |
| 96.49198 | 75.24704 | 73.35684 | 0.036308 | 0.577578732 | 0.949335284 |
| 4570.861 | 4406.132 | 4135.23  | 0.128494 | 0.16710022  | 0.443898537 |
| 47.35255 | 52.95162 | 64.9732  | -0.29975 | 0.106548765 | 0.712929046 |
| 1358.035 | 1354.447 | 1310.992 | 0.13674  | 0.693771149 | 0.442655501 |
| 875.5754 | 803.564  | 902.2892 | 0.239534 | 0.600600887 | 0.238605598 |
| 101.8526 | 139.3464 | 116.323  | -0.11337 | 0.354108154 | 0.832306222 |
| 59.86077 | 71.53113 | 71.26093 | -0.11208 | 0.927256678 | 0.844024501 |
| 3315.572 | 3492.949 | 3240.277 | 0.101129 | 0.099797905 | 0.402824474 |
| 340.4023 | 337.2182 | 459.0042 | 0.100521 | 0.988049891 | 0.774877994 |
| 4291.213 | 4184.107 | 4366.828 | -0.12294 | 0.035589933 | 0.333056689 |
| 2.680333 | 2.786927 | 5.239774 | 0.40923  | NA          | NA          |
| 471.7386 | 450.5532 | 452.7165 | -0.59117 | 0.035776598 | 3.1943E-06  |
| 827.3294 | 741.3227 | 624.5811 | 0.214195 | 0.260444304 | 0.386225205 |
| 0        | 0        | 0        | #DIV/0!  | NA          | NA          |
| 2829.538 | 2681.024 | 2683.812 | -0.17618 | 0.157365929 | 0.184672738 |
| 1310.683 | 1316.359 | 1411.595 | -0.14233 | 0.946929815 | 0.417522611 |
| 0        | 0.928976 | 0        | -0.86025 | NA          | NA          |
| 1630.536 | 1517.017 | 1269.073 | 0.18615  | 0.981160904 | 0.437727687 |
| 802.3129 | 852.7997 | 780.7264 | 0.052613 | 0.86616202  | 0.814580971 |

|          |          |          |          |             |             |
|----------|----------|----------|----------|-------------|-------------|
| 30.3771  | 25.08235 | 41.9182  | -1.18197 | 0.018765686 | 0.010292932 |
| 101.8526 | 69.67318 | 56.58956 | -0.23745 | 0.92790798  | 0.722021255 |
| 163.5003 | 215.5224 | 173.9605 | 0.490535 | 0.817609984 | 0.088412059 |
| 2685.693 | 2802.72  | 3139.673 | -0.29888 | 0.572336545 | 0.012748693 |
| 2088.873 | 2030.741 | 1823.442 | -0.11984 | 0.000661553 | 0.400098164 |
| 1546.552 | 1534.668 | 1408.451 | -0.01836 | 0.731285248 | 0.947221243 |
| 594.1404 | 592.6865 | 589.9986 | 0.069122 | 0.258431804 | 0.735679134 |
| 2675.866 | 2701.462 | 2766.601 | -0.15028 | 0.894462417 | 0.280613898 |
| 2001.315 | 1812.432 | 1960.724 | -0.11099 | 0.582750031 | 0.515558505 |
| 1578.716 | 1721.392 | 1497.528 | 0.357369 | 0.311697167 | 0.075363288 |
| 1771.7   | 1730.682 | 1955.484 | -0.3408  | 0.455280748 | 0.001662103 |
| 3.573777 | 0        | 3.143865 | -0.79359 | 0.434274199 | NA          |
| 986.3625 | 914.1121 | 943.1594 | -0.24886 | 0.787792061 | 0.110349167 |
| 55.39354 | 68.74421 | 71.26093 | -0.61408 | 0.043426903 | 0.092015479 |
| 1036.395 | 1050.672 | 1400.068 | -0.12391 | 0.028028845 | 0.627660382 |
| 687.0586 | 743.1806 | 669.6432 | 0.305989 | 0.565330117 | 0.048489294 |
| 1319.617 | 1283.845 | 1198.86  | 0.308489 | 0.871801928 | 0.01955739  |
| 1034.608 | 1032.092 | 873.9944 | 0.232766 | 0.992476114 | 0.186995116 |
| 195.6643 | 209.9485 | 181.2962 | 0.072183 | 0.843507519 | 0.862412114 |
| 2056.709 | 2058.61  | 1778.379 | 0.141923 | 0.103085653 | 0.626606102 |
| 899.6984 | 943.8394 | 818.4528 | 0.240137 | 0.148004742 | 0.408058591 |
| 600.3945 | 564.8173 | 479.9633 | -0.11816 | 0.703609106 | 0.639831259 |
| 697.78   | 600.1183 | 572.1834 | 0.168859 | 0.957754117 | 0.502156977 |
| 894.3377 | 1076.683 | 1026.996 | -0.19976 | 0.735300868 | 0.25282015  |
| 1077.494 | 1034.879 | 925.3442 | 0.235878 | 0.759261525 | 0.375516452 |
| 1056.051 | 1018.157 | 1055.291 | -0.07629 | 0.828690815 | 0.697184019 |
| 1544.765 | 1572.756 | 1698.735 | -0.09349 | 0.859748112 | 0.673302041 |
| 3605.048 | 3456.719 | 3590.293 | -0.08519 | 0.034815958 | 0.497130933 |
| 1148.969 | 888.1008 | 1047.955 | 0.055962 | 0.639350783 | 0.825748549 |
| 1297.281 | 1419.475 | 1120.264 | 0.164016 | 0.770051929 | 0.467088769 |
| 2999.292 | 2829.66  | 2954.185 | 0.121863 | 0.008233634 | 0.430182989 |
| 368.9925 | 398.5306 | 376.2158 | 0.118006 | 0.298622885 | 0.616511903 |
| 115.2543 | 116.122  | 130.9944 | 0.269166 | 0.229874823 | 0.61918051  |
| 0.893444 | 4.644879 | 2.09591  | -0.74023 | 0.962556121 | NA          |
| 460.1238 | 470.9907 | 520.8336 | -0.17701 | 0.228243156 | 0.436785507 |
| 664.7225 | 800.7771 | 863.5148 | -0.43664 | 0.787835013 | 0.014438677 |
| 432.427  | 368.8034 | 361.5444 | -0.00739 | 0.915659837 | 0.979801623 |
| 1660.019 | 1645.216 | 1568.788 | -0.02459 | 0.756571209 | 0.905975684 |
| 109.8936 | 98.47143 | 110.0353 | -0.11357 | 0.335666342 | 0.829566409 |
| 1147.182 | 1144.498 | 1113.976 | -0.00118 | 0.847714103 | 0.99985654  |
| 201.9184 | 282.4086 | 234.7419 | 0.10702  | 0.051273953 | 0.778199039 |
| 274.2874 | 276.8348 | 282.9478 | 0.468174 | 0.06343049  | 0.112852596 |
| 612.9028 | 604.7632 | 606.7659 | -0.58722 | 0.639085319 | 3.93255E-05 |
| 390.4351 | 379.0221 | 402.4147 | -0.01654 | 0.72742168  | 0.962321489 |
| 22763.17 | 21942.41 | 25660.22 | -0.04305 | 0.000126563 | 0.832033519 |
| 1209.724 | 1262.478 | 1165.326 | 0.000913 | 0.397105869 | 0.99985654  |
| 435.1074 | 452.4112 | 379.3597 | 0.089737 | 0.626260019 | 0.775439768 |
| 333.2547 | 308.42   | 346.8731 | -0.30484 | 0.455280748 | 0.282666674 |
| 192.0905 | 212.7354 | 300.7631 | -0.4717  | 0.262290046 | 0.061045315 |
| 2593.669 | 2359.598 | 2421.824 | 0.06877  | 0.011540931 | 0.74730223  |
| 1128.42  | 1037.666 | 1057.386 | 0.11074  | 0.506703303 | 0.638725554 |
| 1282.093 | 1296.85  | 1176.853 | 0.279286 | 0.413714744 | 0.191769337 |
| 1376.798 | 1316.359 | 1252.306 | 0.069435 | 0.714180196 | 0.754367859 |
| 503.0091 | 425.4709 | 499.8745 | -0.65669 | 0.287050142 | 2.9108E-06  |

|          |          |          |          |             |             |
|----------|----------|----------|----------|-------------|-------------|
| 1289.24  | 1436.197 | 1096.161 | 0.089799 | 0.527593235 | 0.728406381 |
| 228.7217 | 209.0195 | 217.9746 | -0.06821 | 0.324651337 | 0.865246562 |
| 159.0331 | 210.8775 | 208.543  | 0.017203 | 0.235856061 | 0.974691849 |
| 3552.334 | 3470.653 | 3726.528 | -0.04825 | 0.990735591 | 0.753881265 |
| 3019.842 | 3116.714 | 2878.732 | 0.118565 | 0.262338145 | 0.37942314  |
| 1329.445 | 1402.753 | 1111.88  | 0.348071 | 0.732140966 | 0.11799835  |
| 718.3292 | 732.0329 | 845.6996 | 0.113157 | 0.936346196 | 0.565559013 |
| 7640.735 | 7188.414 | 9008.22  | -0.13129 | 0.369977802 | 0.456678882 |
| 300.1973 | 284.2666 | 221.1185 | 0.054144 | 0.274927458 | 0.887908388 |
| 712.9685 | 666.0756 | 581.615  | 0.189717 | 0.670790001 | 0.427452223 |
| 0        | 0        | 0        | #DIV/0!  | NA          |             |
| 121.5084 | 141.2043 | 117.3709 | 0.900311 | 0.854862911 | 0.006858707 |
| 10228.15 | 10568.96 | 11869.14 | -0.27963 | 0.867574132 | 0.064858857 |
| 368.099  | 365.0875 | 379.3597 | 0.028391 | 0.637753032 | 0.951624375 |
| 3402.236 | 3165.02  | 3519.033 | 0.107929 | 0.948896953 | 0.547918323 |
| 14982.17 | 14246.77 | 15576.8  | -0.06322 | 0.553033696 | 0.74477658  |
| 1476.863 | 1496.58  | 1405.308 | 0.012253 | 0.720966293 | 0.941411168 |
| 2372.988 | 2406.976 | 2473.174 | -0.02302 | 0.58004353  | 0.91107822  |
| 9.827887 | 13.00566 | 4.19182  | 0.261207 | 0.827268091 | NA          |
| 325.2137 | 370.6613 | 380.4076 | -0.38678 | 0.839737561 | 0.055523327 |
| 482.4599 | 470.0617 | 385.6474 | 0.065383 | 0.572219847 | 0.843531118 |
| 1291.92  | 1448.273 | 1473.425 | 0.074595 | 0.749431368 | 0.753881265 |
| 138.4839 | 125.4117 | 144.6178 | 0.015169 | 0.018619821 | 0.975406172 |
| 334.1482 | 287.9825 | 321.7222 | -0.01736 | 0.182596799 | 0.96505606  |
| 2086.192 | 2188.667 | 1881.079 | 0.054077 | 0.786445338 | 0.86344732  |
| 2619.579 | 2524.956 | 2416.584 | -0.0211  | 3.02032E-05 | 0.904467867 |
| 657.575  | 639.1353 | 576.3752 | -0.10507 | 0.59668269  | 0.606467508 |
| 251.0578 | 280.5507 | 273.5162 | 0.036579 | 0.981023664 | 0.923725803 |
| 1146.289 | 1218.816 | 1121.312 | 0.122217 | 0.832043227 | 0.5847566   |
| 1000.658 | 950.3422 | 1129.695 | -0.23524 | 0.256943324 | 0.124254462 |
| 0        | 0        | 20.9591  | 1.67032  | NA          | NA          |
| 1748.47  | 1729.753 | 1649.481 | 0.303964 | 0.088334441 | 0.018025328 |
| 407.4106 | 444.0504 | 387.7433 | -0.31178 | 0.417038094 | 0.162970478 |
| 10295.16 | 10150.92 | 10361.13 | -0.37322 | 0.434168259 | 1.53522E-08 |
| 3395.982 | 3350.816 | 3653.171 | -0.25729 | 0.804201321 | 0.092971431 |
| 2639.234 | 2613.209 | 2609.408 | 0.082389 | 0.262015581 | 0.569740265 |
| 2563.292 | 2584.411 | 2240.528 | -0.07295 | 0.434274199 | 0.744396459 |
| 1148.076 | 1164.936 | 1290.032 | 0.001108 | 0.648891486 | 0.995091298 |
| 643.2799 | 603.8342 | 559.6079 | 0.095056 | 0.98843748  | 0.68408594  |
| 1256.183 | 1402.753 | 1348.718 | 0.271528 | 0.252345272 | 0.128665301 |
| 1336.593 | 1319.146 | 1320.423 | 0.436921 | 0.467784161 | 0.00712557  |
| 592.3535 | 578.7519 | 504.0663 | 0.132089 | 0.832298202 | 0.681228083 |
| 952.4116 | 1033.021 | 937.9196 | -0.2887  | 0.270719269 | 0.016996857 |
| 0.893444 | 0        | 0        | #DIV/0!  | NA          | NA          |
| 540.5338 | 607.5501 | 652.8759 | -0.08678 | 0.906767387 | 0.699804545 |
| 1669.847 | 1712.102 | 1641.097 | 0.202037 | 9.14127E-07 | 0.371661626 |
| 2239.865 | 2205.388 | 2058.183 | -0.18593 | 0.152084817 | 0.227798107 |
| 1131.1   | 1112.913 | 1247.066 | -0.12628 | 0.524923966 | 0.535066149 |
| 11676.42 | 11770.12 | 12348.05 | -0.15512 | 0.901380807 | 0.176169028 |
| 1835.135 | 1751.119 | 1903.086 | -0.00335 | 0.853331381 | 0.992528568 |
| 20.54922 | 23.22439 | 33.53456 | 0.079917 | 0.73478662  | NA          |
| 278.7546 | 254.5394 | 253.6051 | 0.285703 | 0.763001611 | 0.376918607 |
| 1834.241 | 1964.784 | 1790.955 | -0.12245 | 0.317073718 | 0.398890652 |
| 2760.743 | 2777.638 | 2706.867 | 0.076712 | 0.446999299 | 0.599924988 |

|          |          |          |             |                |             |
|----------|----------|----------|-------------|----------------|-------------|
| 1203.469 | 955.9161 | 922.2003 | -0.21619    | 0.886888038    | 0.318625647 |
| 1.786889 | 0        | 0        | -1.55981 NA | NA             |             |
| 47.35255 | 47.37776 | 32.4866  | 0.028111    | 0.331331472    | 0.990023409 |
| 450.2959 | 331.6443 | 466.3399 | -0.03908    | 0.924284267    | 0.914772543 |
| 4286.746 | 4358.754 | 4583.755 | -0.39024    | 0.430461737    | 3.62177E-05 |
| 195.6643 | 158.8549 | 212.7348 | -0.83854    | 0.868137167    | 0.001351995 |
| 3614.875 | 3623.934 | 3502.265 | 0.017251    | 0.981711158    | 0.922071247 |
| 1452.74  | 1422.262 | 1174.757 | 0.174925    | 0.33985187     | 0.437727687 |
| 1032.822 | 933.6206 | 1031.188 | -0.06577    | 0.981637588    | 0.703203936 |
| 2336.357 | 2181.235 | 2232.144 | -0.1072     | 0.034700814    | 0.515558505 |
| 1924.479 | 1638.713 | 1955.484 | -0.07568    | 0.364654282    | 0.74872051  |
| 1043.543 | 1147.285 | 1043.763 | 0.218028    | 0.934554042    | 0.159147544 |
| 1238.314 | 1281.987 | 1241.827 | 0.135505    | 0.004283832    | 0.436738287 |
| 536.0666 | 539.7349 | 597.3343 | 0.010082    | 0.485402441    | 0.97680656  |
| 1912.864 | 1684.233 | 1782.571 | -0.05627    | 0.517968435    | 0.806564543 |
| 6.25411  | 3.715903 | 10.47955 | 0.410404    | 0.84819607 NA  |             |
| 3905.245 | 3731.696 | 3550.471 | 0.171339    | 0.323145934    | 0.258978375 |
| 1165.051 | 1275.484 | 976.694  | 0.087675    | 0.947037414    | 0.753167659 |
| 1082.854 | 973.5666 | 1108.736 | -0.14228    | 0.724349652    | 0.394044776 |
| 535.1731 | 575.965  | 499.8745 | 0.207937    | 0.308685572    | 0.545985077 |
| 150.9921 | 136.5594 | 181.2962 | -0.05453    | 0.614621507    | 0.896421455 |
| 0        | 0        | 0        | #DIV/0! NA  | NA             |             |
| 0        | 3.715903 | 14.67137 | -0.45378    | 0.682713002 NA |             |
| 792.4851 | 819.3566 | 778.6305 | -0.15716    | 0.270719269    | 0.477876695 |
| 1243.674 | 1190.018 | 1338.238 | -0.00714    | 0.926431363    | 0.983469507 |
| 1515.281 | 1371.168 | 1610.707 | -0.02207    | 0.052845299    | 0.922101817 |
| 102.7461 | 48.30674 | 76.50071 | -0.54014    | 0.637486498    | 0.210822498 |
| 4191.147 | 4002.028 | 3742.247 | 0.029602    | 0.00016523     | 0.87134989  |
| 3149.391 | 2841.737 | 3123.954 | 0.166339    | 0.668522148    | 0.247115917 |
| 67.00832 | 74.31806 | 77.54866 | -0.45163    | 0.948234757    | 0.275261425 |
| 283.2218 | 282.4086 | 283.9958 | 0.347893    | 0.94035236     | 0.174836857 |
| 1308.002 | 1308.927 | 1056.339 | 0.147929    | 0.363948776    | 0.609093663 |
| 12.50822 | 5.573855 | 5.239774 | 1.824425 NA | NA             |             |
| 0        | 0        | 0        | #NUM! NA    | NA             |             |
| 461.9107 | 475.6356 | 442.237  | 0.100533    | 0.387883832    | 0.69424407  |
| 2043.307 | 2079.977 | 2138.876 | -0.12314    | 0.832298202    | 0.378819077 |
| 276.0743 | 256.3973 | 230.5501 | -0.1117     | 0.230402467    | 0.719971458 |
| 1215.978 | 1178.87  | 976.694  | 0.133606    | 0.764395772    | 0.690294956 |
| 1163.264 | 1104.552 | 1169.518 | -0.07802    | 0.804410815    | 0.71621184  |
| 1385.732 | 1378.6   | 1233.443 | 0.045413    | 0.555061446    | 0.80030609  |
| 33.05744 | 29.72722 | 18.86319 | 0.721044    | 0.537991135 NA |             |
| 1044.436 | 1142.64  | 1037.475 | 0.301971    | 0.344558327    | 0.06712239  |
| 461.9107 | 466.3458 | 571.1354 | -0.09798    | 0.635191985    | 0.732745416 |
| 4386.811 | 4385.695 | 4312.334 | -0.26369    | 0.870263501    | 0.025807779 |
| 14595.31 | 14324.81 | 13116.2  | 0.100259    | 0.115777882    | 0.502754884 |
| 0.893444 | 0        | 0        | -2.14477 NA | NA             |             |
| 1668.954 | 1545.816 | 1825.537 | -0.12849    | 0.463993613    | 0.394829397 |
| 197.4512 | 172.7895 | 141.4739 | 0.201783    | 0.90469595     | 0.634014533 |
| 334.1482 | 354.8687 | 304.9549 | 0.086985    | 0.576613335    | 0.786706509 |
| 1711.839 | 1708.386 | 1780.475 | 0.032355    | 0.501719382    | 0.859010941 |
| 280.5415 | 229.457  | 219.0226 | -0.04532    | 0.962556121    | 0.922101817 |
| 117.9346 | 142.1333 | 144.6178 | 0.146672    | 0.37602059     | 0.698960269 |
| 3.573777 | 0        | 13.62341 | 1.517496    | 0.998829997 NA |             |
| 829.1163 | 707.8795 | 652.8759 | 0.138326    | 0.792868376    | 0.610317713 |

|          |          |          |          |             |             |
|----------|----------|----------|----------|-------------|-------------|
| 929.182  | 1029.305 | 952.591  | 0.203433 | 0.778141653 | 0.268536077 |
| 1164.158 | 1151.93  | 1314.135 | -0.18237 | 0.668522148 | 0.402824474 |
| 0        | 0        | 3.143865 | -1.79444 | 0.82365137  | NA          |
| 519.0911 | 587.1127 | 566.9436 | -0.41884 | 0.005553951 | 0.00095673  |
| 920.2476 | 917.8281 | 1102.449 | -0.0851  | 0.553033696 | 0.729565723 |
| 641.493  | 648.4251 | 645.5402 | 0.048655 | 0.430461737 | 0.87466351  |
| 194.7708 | 217.3803 | 204.3512 | 0.023224 | 0.022922256 | 0.973438605 |
| 313.5989 | 279.6217 | 335.3456 | 0.279144 | 0.14943639  | 0.267468464 |
| 1308.002 | 1308.927 | 1189.429 | 0.285067 | 0.208221128 | 0.239236051 |
| 16.97544 | 5.573855 | 23.05501 | -0.57914 | 0.882057909 | NA          |
| 522.6649 | 484.9253 | 447.4767 | 0.27977  | 0.730407446 | 0.251743462 |
| 979.2149 | 960.5609 | 1238.683 | -0.13187 | 0.988049891 | 0.545985077 |
| 23.22955 | 28.79825 | 35.63047 | -0.0166  | 0.433570568 | 0.961378287 |
| 0.893444 | 0.928976 | 0        | 0.468598 | NA          | NA          |
| 832.69   | 912.2542 | 904.3851 | -0.00452 | 0.404785633 | 0.993537704 |
| 1234.74  | 1176.083 | 912.7687 | 0.019823 | 0.596065856 | 0.952588397 |
| 444.9352 | 552.7406 | 444.3329 | 0.379197 | 0.314509384 | 0.066436334 |
| 1361.609 | 1172.367 | 1240.779 | -0.06144 | 0.064123971 | 0.822050288 |
| 629.8782 | 593.6155 | 672.787  | 0.199696 | 0.42970588  | 0.285602122 |
| 8.934443 | 3.715903 | 2.09591  | #DIV/0!  | NA          | NA          |
| 1593.905 | 1584.833 | 1519.535 | 0.209592 | 0.875368742 | 0.287569887 |
| 770.149  | 838.8651 | 707.3696 | 0.437726 | 0.73146374  | 0.046523177 |
| 6.25411  | 6.50283  | 8.383639 | 1.419723 | 0.996453878 | NA          |
| 2410.513 | 2513.808 | 2231.096 | -0.11155 | 0.992476114 | 0.437811634 |
| 1899.462 | 1850.52  | 1855.928 | -0.05659 | 0.6744135   | 0.773113821 |
| 460.1238 | 453.3402 | 675.9309 | -0.25115 | 0.947527175 | 0.350427789 |
| 1708.265 | 1805.929 | 1941.86  | -0.02733 | 0.565571713 | 0.899731862 |
| 35.73777 | 35.30108 | 18.86319 | -1.01244 | 0.483188815 | 0.060630053 |
| 637.0258 | 596.4024 | 755.5755 | -0.45247 | 0.089410503 | 0.002309437 |
| 1519.749 | 1524.449 | 1453.513 | 0.242163 | 0.406835177 | 0.099741709 |
| 406.5171 | 468.2038 | 511.402  | -0.09926 | 0.826883467 | 0.764338813 |
| 9049.697 | 9375.223 | 10473.26 | -0.50907 | 0.7784685   | 0.000804398 |
| 969.387  | 912.2542 | 962.0226 | -0.12059 | 0.900789434 | 0.414781698 |
| 8.934443 | 18.57952 | 14.67137 | -0.25437 | 0.817609984 | NA          |
| 463.6976 | 533.2321 | 505.1143 | -0.19248 | 0.861070915 | 0.437811634 |
| 2096.02  | 2042.818 | 1954.436 | 0.010128 | 0.6212524   | 0.962161209 |
| 555.7223 | 580.6099 | 666.4993 | -0.13752 | 0.854046275 | 0.536619543 |
| 1917.331 | 1939.701 | 1795.147 | 0.031047 | 0.469683278 | 0.87444105  |
| 143.8445 | 183.9372 | 171.8646 | -0.30636 | 0.713210135 | 0.262359598 |
| 1095.363 | 1221.603 | 1113.976 | 0.203759 | 0.157331056 | 0.206562409 |
| 5039.919 | 4970.949 | 4691.694 | 0.170852 | 0.112064101 | 0.370304803 |
| 1978.086 | 2060.468 | 2061.327 | -0.01754 | 0.226105917 | 0.93327699  |
| 4900.542 | 4702.475 | 4902.333 | -0.0064  | 0.695990097 | 0.975406172 |
| 60.75421 | 41.80391 | 37.72638 | 0.55674  | 0.762033914 | NA          |
| 3714.048 | 3907.272 | 3699.281 | -0.01664 | 0.310443697 | 0.919915102 |
| 1068.559 | 1183.515 | 1371.773 | -0.47614 | 0.494358204 | 0.001567387 |
| 0        | 0        | 0        | #DIV/0!  | NA          | NA          |
| 1150.756 | 1134.279 | 987.1735 | 0.059486 | 0.68066159  | 0.828926206 |
| 1826.2   | 1674.014 | 1688.255 | 0.233823 | 0.225117575 | 0.183923086 |
| 3983.868 | 3870.113 | 4393.027 | -0.05843 | 0.829098381 | 0.748961137 |
| 159.0331 | 139.3464 | 144.6178 | 0.119984 | 0.948234757 | 0.809142313 |
| 2018.291 | 1909.974 | 2087.526 | -0.5137  | 0.007236622 | 1.46636E-09 |
| 365.4187 | 377.1642 | 355.2567 | -0.07399 | 0.960773888 | 0.774877994 |
| 89.34443 | 68.74421 | 98.50776 | -0.82914 | 0.687155674 | 0.007856475 |

|          |          |          |          |                |             |
|----------|----------|----------|----------|----------------|-------------|
| 526.2387 | 605.6922 | 771.2948 | -0.73515 | 0.331795127    | 8.43329E-05 |
| 1111.445 | 1159.362 | 1251.258 | 0.079216 | 0.826883467    | 0.733968665 |
| 186.7298 | 172.7895 | 164.5289 | 0.270079 | 0.817060109    | 0.436772875 |
| 2509.685 | 2419.053 | 2724.683 | 0.092899 | 0.183178382    | 0.54110554  |
| 793.3785 | 802.6351 | 678.0268 | 0.0147   | 0.67324111     | 0.967817837 |
| 229.6152 | 168.1446 | 151.9535 | 0.573292 | 0.539220495    | 0.127945669 |
| 796.9523 | 815.6407 | 804.8294 | -0.24676 | 0.00878771     | 0.162954416 |
| 224.2545 | 220.1673 | 192.8237 | -0.27514 | 0.298839192    | 0.407575574 |
| 13.40166 | 26.01132 | 54.49365 | 0.377415 | 0.562248048    | 0.685537269 |
| 441.3615 | 334.4313 | 290.2835 | -0.26346 | 0.794232621    | 0.410222128 |
| 868.4278 | 944.7683 | 956.7828 | -0.47748 | 0.008720893    | 0.000100604 |
| 2307.767 | 2438.561 | 2337.987 | -0.0315  | 0.780980494    | 0.877477421 |
| 2618.685 | 2626.214 | 2208.041 | 0.533092 | 0.205372066    | 0.20379563  |
| 3459.416 | 3357.318 | 3270.667 | -0.06184 | 0.115981316    | 0.627713216 |
| 1910.184 | 2004.73  | 1903.086 | -0.16675 | 3.09589E-05    | 0.109807224 |
| 466.3779 | 467.2748 | 545.9845 | -0.38665 | 0.99647374     | 0.011552862 |
| 4560.139 | 4912.424 | 4706.365 | -0.05942 | 0.993774385    | 0.74588273  |
| 1615.347 | 1659.151 | 1341.382 | 0.086718 | 0.655427675    | 0.775439768 |
| 14.29511 | 9.289758 | 18.86319 | -0.31464 | 0.847096689 NA |             |
| 2281.857 | 2214.678 | 1963.867 | 0.124003 | 0.78204194     | 0.536590083 |
| 989.9362 | 876.9531 | 933.7278 | 0.141634 | 0.729364673    | 0.545985077 |
| 1373.224 | 1172.367 | 1450.37  | 0.073215 | 0.828016939    | 0.742127697 |
| 651.3209 | 707.8795 | 567.9916 | 0.268181 | 0.038048538    | 0.278856737 |
| 1616.241 | 1602.483 | 1539.446 | 0.029927 | 0.008686831    | 0.878502464 |
| 2045.987 | 2111.562 | 1873.743 | -0.05631 | 0.836240002    | 0.803458765 |
| 11613.88 | 10647.92 | 9872.783 | 0.220832 | 0.02597477     | 0.384133344 |
| 913.9935 | 944.7683 | 853.0353 | -0.04752 | 0.592978918    | 0.823966789 |
| 1017.633 | 1067.393 | 1021.756 | -0.13873 | 0.045913153    | 0.402824474 |
| 934.5427 | 943.8394 | 760.8153 | 0.07973  | 0.666270528    | 0.783107724 |
| 645.9602 | 484.9253 | 495.6827 | 0.366196 | 0.910726255    | 0.142474764 |
| 1799.397 | 1735.327 | 1571.932 | 0.19938  | 0.310114043    | 0.350867993 |
| 1324.978 | 1252.259 | 1356.054 | 0.349397 | 0.13366062     | 0.190817982 |
| 3293.236 | 3306.225 | 4095.408 | -0.64995 | 0.494209809    | 5.09008E-06 |
| 64.32799 | 46.44879 | 55.54161 | 0.185969 | 0.668508083    | 0.82132239  |
| 682.5914 | 660.5018 | 641.3484 | 0.195432 | 0.549290634    | 0.251743462 |
| 3673.843 | 3418.631 | 3239.229 | 0.211895 | 0.008454108    | 0.181725119 |
| 57.18043 | 87.32372 | 88.02821 | -0.73457 | 7.08114E-06    | 0.020139549 |
| 1064.986 | 1029.305 | 991.3653 | 0.255084 | 0.842806932    | 0.219264296 |
| 1505.454 | 1438.983 | 1474.473 | 0.139576 | 0.045913153    | 0.41822825  |
| 444.9352 | 421.755  | 417.086  | -0.0341  | 0.619820968    | 0.914120833 |
| 814.8212 | 798.9192 | 666.4993 | 0.369389 | 0.718622163    | 0.098479436 |
| 622.7306 | 704.1636 | 594.1904 | -0.08858 | 0.564346914    | 0.690294956 |
| 3024.309 | 3072.123 | 3179.495 | -0.27759 | 0.011304032    | 0.000732015 |
| 1093.576 | 1030.234 | 875.0423 | 0.113362 | 0.907472172    | 0.656368654 |
| 1928.053 | 1745.545 | 1751.133 | 0.15264  | 0.143062759    | 0.243388227 |
| 1741.323 | 1731.611 | 1651.577 | 0.129195 | 0.310443697    | 0.535221009 |
| 3244.99  | 3239.338 | 3458.251 | -0.22884 | 0.434274199    | 0.064954005 |
| 1750.257 | 1781.776 | 1994.258 | -0.0358  | 0.868137167    | 0.846177331 |
| 2534.701 | 2679.166 | 2337.987 | 0.136348 | 0.379440934    | 0.433632804 |
| 1031.035 | 1078.541 | 869.8026 | 0.143886 | 0.856763291    | 0.525178886 |
| 585.206  | 602.9053 | 570.0875 | 0.352374 | 0.500344775    | 0.051038786 |
| 1243.674 | 1157.504 | 1155.894 | 0.081386 | 0.113562986    | 0.686433182 |
| 740.6653 | 761.7601 | 737.7602 | 0.233352 | 0.638519612    | 0.306279885 |
| 1055.158 | 1079.47  | 902.2892 | 0.028166 | 0.396688154    | 0.923725803 |

|          |          |          |            |                |             |
|----------|----------|----------|------------|----------------|-------------|
| 410.9844 | 517.4395 | 511.402  | -0.42717   | 0.798105246    | 0.033509815 |
| 2574.906 | 2326.155 | 2496.229 | 0.443743   | 0.376884278    | 0.000572062 |
| 573.5912 | 588.0417 | 668.5952 | -0.11006   | 0.904254847    | 0.625382385 |
| 41.09844 | 52.02264 | 48.20593 | -0.55737   | 0.261514221    | 0.205726872 |
| 1499.199 | 1671.227 | 1563.549 | 0.127221   | 0.766253365    | 0.450085983 |
| 627.1979 | 630.7745 | 661.2595 | 0.087076   | 0.654926306    | 0.66000496  |
| 305.5579 | 376.2352 | 364.6883 | 0.21776    | 0.759261525    | 0.437727687 |
| 1548.339 | 1510.515 | 1781.523 | 0.039742   | 0.697514819    | 0.889915228 |
| 2132.651 | 2131.999 | 1896.798 | -0.18515   | 0.000532839    | 0.309248984 |
| 0        | 0        | 0        | #DIV/0! NA | NA             |             |
| 1707.372 | 1775.273 | 1769.996 | -0.09908   | 0.002387022    | 0.515285838 |
| 508.3698 | 465.4169 | 515.5938 | 0.128891   | 0.573024726    | 0.575546698 |
| 402.9434 | 449.6243 | 418.134  | -0.05181   | 0.626260019    | 0.86814025  |
| 1546.552 | 1739.043 | 1712.358 | -0.06869   | 0.982280934    | 0.728253469 |
| 856.813  | 901.1065 | 979.8378 | -0.36135   | 0.6744135      | 0.00861945  |
| 6377.405 | 5717.846 | 6959.468 | 0.029226   | 0.451912698    | 0.89451867  |
| 562.8699 | 493.2861 | 538.6488 | -0.34469   | 0.67324111     | 0.066594503 |
| 2626.726 | 2711.68  | 2514.044 | 0.013613   | 0.071245169    | 0.947221243 |
| 400.263  | 394.8147 | 450.6206 | -0.49957   | 0.490813332    | 0.007994297 |
| 410.0909 | 403.1755 | 406.6065 | -0.08758   | 0.430461737    | 0.799909776 |
| 1.786889 | 0        | 2.09591  | -1.51098   | 0.6333028 NA   |             |
| 1.786889 | 0        | 0        | -3.27372   | 0.870947007 NA |             |
| 46.4591  | 26.01132 | 36.67842 | -0.03692   | 0.586117995 NA |             |
| 3148.498 | 3014.526 | 2789.656 | 0.171246   | 0.246058895    | 0.260773478 |
| 945.264  | 925.2599 | 860.371  | 0.033061   | 0.871801928    | 0.89969904  |
| 6580.217 | 6470.316 | 6610.499 | -0.16854   | 0.825797061    | 0.210414951 |
| 1394.666 | 1387.89  | 1406.355 | 0.020455   | 0.122329881    | 0.923725803 |
| 2005.782 | 2047.463 | 1755.324 | 0.14362    | 0.570003668    | 0.61918051  |
| 661.1488 | 686.5131 | 659.1636 | 0.140832   | 0.673772903    | 0.510445084 |
| 2976.063 | 2938.35  | 3219.317 | -0.04592   | 0.352900476    | 0.81253834  |
| 984.5756 | 881.598  | 855.1312 | -0.01645   | 0.776530046    | 0.953528509 |
| 4291.213 | 4336.459 | 3962.317 | 0.166065   | 0.651806624    | 0.269360139 |
| 552.1486 | 577.8229 | 659.1636 | 0.018232   | 0.957987619    | 0.946922147 |
| 1569.782 | 1405.54  | 1323.567 | 0.276116   | 0.247855038    | 0.144968034 |
| 9780.534 | 9633.479 | 9673.672 | -0.23739   | 0.226056492    | 0.060802767 |
| 869.3213 | 881.598  | 701.0818 | 0.176056   | 0.563625743    | 0.529024216 |
| 1018.526 | 956.845  | 964.1185 | 0.250147   | 0.653304895    | 0.198030129 |
| 2115.676 | 2387.468 | 2204.897 | 0.163687   | 0.959859312    | 0.268382708 |
| 1396.453 | 1418.546 | 1381.205 | -0.1329    | 0.48612699     | 0.361214706 |
| 888.977  | 873.2372 | 819.5007 | 0.342368   | 0.73478662     | 0.013177469 |
| 175.1151 | 206.2326 | 270.3724 | -0.07301   | 0.842190796    | 0.855100406 |
| 1073.027 | 1025.589 | 1002.893 | 0.035268   | 0.831143588    | 0.850669379 |
| 932.7558 | 1064.606 | 1039.571 | -0.14997   | 0.934554042    | 0.352934781 |
| 1014.059 | 1106.41  | 926.3921 | -0.05807   | 0.140032454    | 0.822780332 |
| 968.4936 | 1103.623 | 940.0155 | 0.04183    | 0.925903677    | 0.864363898 |
| 487.8206 | 467.2748 | 448.5247 | -0.01191   | 0.995526989    | 0.965791283 |
| 154.5659 | 192.298  | 212.7348 | -0.1612    | 0.682715357    | 0.651302885 |
| 832.69   | 818.4276 | 899.1453 | 0.135062   | 0.231422023    | 0.470568982 |
| 386.8614 | 360.4426 | 391.9351 | 0.147279   | 0.252668387    | 0.608073878 |
| 963.1329 | 915.9701 | 1082.537 | 0.017909   | 0.865404007    | 0.941511899 |
| 1643.044 | 1655.435 | 1753.229 | -0.10722   | 0.208221128    | 0.520301247 |
| 1263.33  | 1127.777 | 1219.819 | -0.01889   | 0.803184945    | 0.92540057  |
| 337.7219 | 314.9228 | 314.3865 | 0.433633   | 0.602494298    | 0.060691739 |
| 8.934443 | 34.3721  | 19.91114 | -0.24511   | 0.831143588 NA |             |



|          |          |          |          |             |             |
|----------|----------|----------|----------|-------------|-------------|
| 75.94276 | 66.88625 | 97.45981 | -0.01401 | 0.014661969 | 0.984451848 |
| 1593.905 | 1557.892 | 1826.585 | 0.224948 | 0.456240675 | 0.097879485 |
| 12.50822 | 25.08235 | 16.76728 | -0.15411 | 0.249012381 | NA          |
| 235.8693 | 235.0309 | 313.3385 | -0.38447 | 0.465047544 | 0.12612237  |
| 313.5989 | 321.4256 | 230.5501 | 0.357095 | 0.856680478 | 0.355134703 |
| 35.73777 | 51.09367 | 73.35684 | 0.266759 | 0.716971101 | 0.68408594  |
| 327.894  | 352.0818 | 398.2229 | -0.50956 | 0.188880644 | 0.005141611 |
| 167.0741 | 157.9259 | 212.7348 | -0.06572 | 0.367802825 | 0.875604624 |
| 498.5419 | 502.5759 | 535.505  | -0.18222 | 0.162901755 | 0.339186935 |
| 788.0178 | 732.0329 | 714.7052 | 0.046244 | 0.766887678 | 0.838059844 |
| 438.6811 | 357.6557 | 358.4006 | 0.001601 | 0.022968717 | 0.992528568 |
| 1026.567 | 1023.731 | 1076.25  | 0.251644 | 0.303915516 | 0.097199704 |
| 3.573777 | 1.857952 | 4.19182  | 0.218433 | NA          | NA          |
| 314.4924 | 330.7154 | 389.8392 | -0.37278 | 0.67997963  | 0.06712239  |
| 13269.43 | 13116.21 | 14078.23 | -0.33512 | 0.571061175 | 0.010351567 |
| 4155.409 | 4297.442 | 4347.965 | -0.05828 | 0.417487982 | 0.7475811   |
| 2866.169 | 3115.785 | 3179.495 | -0.02494 | 0.794232621 | 0.900914914 |
| 460.1238 | 424.5419 | 433.8533 | 0.105918 | 0.547416205 | 0.690294956 |
| 1069.453 | 1111.055 | 1101.401 | 0.226461 | 0.29215357  | 0.219723352 |
| 241.2299 | 211.8065 | 231.598  | 0.03262  | 0.791689312 | 0.929939946 |
| 852.3458 | 854.6577 | 920.1044 | -0.07642 | 0.231538797 | 0.764793691 |
| 2240.758 | 2317.795 | 2058.183 | 0.147298 | 0.937354907 | 0.30760874  |
| 2322.062 | 2276.92  | 2361.042 | 0.031581 | 0.161427291 | 0.908612163 |
| 553.9354 | 561.1014 | 628.7729 | -0.50534 | 0.1874606   | 0.001448138 |
| 6.25411  | 7.431806 | 17.81523 | -0.1558  | 0.921503066 | NA          |
| 276.0743 | 245.2496 | 292.3794 | 0.513646 | 0.872688807 | 0.096021406 |
| 539.6403 | 441.2635 | 440.1411 | 0.112526 | 0.380058107 | 0.751151284 |
| 280.5415 | 311.2069 | 310.1946 | -0.40168 | 0.035767958 | 0.091639488 |
| 17892.11 | 17925.52 | 19990.79 | -0.43578 | 0.787835013 | 0.001519825 |
| 3.573777 | 3.715903 | 2.09591  | -1.16351 | 0.362417219 | NA          |
| 1371.437 | 1502.154 | 1506.959 | 0.02995  | 0.757209202 | 0.875604624 |
| 1512.601 | 1740.901 | 1714.454 | 0.013665 | 0.696149523 | 0.953867552 |
| 17.86889 | 20.43747 | 25.15092 | 1.271165 | 0.327964932 | NA          |
| 1534.937 | 1560.679 | 1269.073 | 0.295    | 0.178700298 | 0.167165088 |
| 500.3288 | 483.9964 | 537.6009 | 0.02551  | 0.835664498 | 0.929220289 |
| 550.3617 | 469.1328 | 508.2581 | 0.127415 | 0.662466622 | 0.583691606 |
| 49.13943 | 64.09933 | 57.63752 | -0.4626  | 0.920564616 | 0.385354962 |
| 410.0909 | 369.7324 | 368.8801 | 0.212279 | 0.870816496 | 0.324099572 |
| 343.0826 | 419.897  | 369.9281 | -0.17856 | 0.146490289 | 0.403397484 |
| 1494.732 | 1590.407 | 1366.533 | 0.161058 | 0.904254847 | 0.465657685 |
| 126.8691 | 143.9912 | 192.8237 | -0.40796 | 0.025591463 | 0.162129177 |
| 902.3787 | 852.7997 | 869.8026 | 0.187811 | 0.477428994 | 0.194057829 |
| 641.493  | 570.3911 | 695.842  | 0.304224 | 0.986203512 | 0.193060221 |
| 2787.546 | 2920.7   | 2916.458 | -0.04209 | 0.957987619 | 0.818945755 |
| 3731.917 | 3651.804 | 3732.815 | -0.16292 | 0.897766774 | 0.317888314 |
| 469.9517 | 536.948  | 464.244  | 0.028906 | 0.460515819 | 0.931131803 |
| 973.8542 | 863.0185 | 1061.578 | -0.08015 | 0.919200531 | 0.74872051  |
| 292.1563 | 329.7864 | 232.646  | -0.48952 | 0.050382968 | 0.04967295  |
| 249.2709 | 268.474  | 205.3992 | 0.080303 | 0.462388123 | 0.835596295 |
| 1031.035 | 1093.404 | 1190.477 | -0.00114 | 0.716459644 | 0.99985654  |
| 15001.82 | 14464.15 | 15654.35 | -0.14078 | 0.665780513 | 0.178134034 |
| 620.9438 | 607.5501 | 591.0466 | -0.00933 | 0.935506037 | 0.988943755 |
| 3002.866 | 3047.04  | 2713.155 | 0.179174 | 0.354108154 | 0.2912749   |
| 3348.629 | 3466.009 | 2757.169 | 0.07317  | 0.579415204 | 0.823637286 |

|          |          |          |            |                |             |
|----------|----------|----------|------------|----------------|-------------|
| 137.5904 | 138.4174 | 130.9944 | -0.03026   | 0.476187241    | 0.967817837 |
| 1972.725 | 1903.471 | 1964.915 | 0.18152    | 0.759069408    | 0.078157207 |
| 514.6239 | 534.1611 | 462.1481 | -0.03493   | 0.872444605    | 0.89969904  |
| 788.9113 | 842.581  | 696.89   | 0.22541    | 0.585115533    | 0.392881614 |
| 2408.726 | 2514.737 | 2978.288 | 0.142187   | 0.935523245    | 0.542274871 |
| 807.6736 | 855.5867 | 846.7476 | -0.25962   | 0.001474651    | 0.066045956 |
| 484.2468 | 472.8487 | 429.6615 | 0.18076    | 0.98409529     | 0.465657685 |
| 25.01644 | 22.29542 | 22.00705 | -0.12328   | 0.967317013 NA |             |
| 997.9772 | 824.0015 | 951.543  | 0.04631    | 0.769710962    | 0.864252513 |
| 352.017  | 317.7097 | 281.8999 | 0.047136   | 0.192384879    | 0.877477421 |
| 13.40166 | 7.431806 | 8.383639 | -0.9999    | 0.948896953 NA |             |
| 7630.014 | 7651.044 | 8553.408 | -0.43708   | 0.587719544    | 7.94614E-05 |
| 114.3609 | 120.7668 | 104.7955 | -0.00215   | 0.871801928    | 0.997036378 |
| 8275.081 | 8069.083 | 7112.47  | 0.084535   | 0.026728815    | 0.718440886 |
| 930.9689 | 912.2542 | 900.1933 | 0.019745   | 0.572336545    | 0.938924382 |
| 1004.231 | 1197.45  | 1203.052 | -0.17842   | 0.7406592      | 0.423533881 |
| 10.72133 | 21.36644 | 22.00705 | -0.15881   | 0.875368742 NA |             |
| 1417.003 | 1495.651 | 1556.213 | 0.747378   | 0.509740526    | 1.89846E-06 |
| 46.4591  | 69.67318 | 32.4866  | 0.214495   | 0.834965572    | 0.757863278 |
| 1792.249 | 1757.622 | 1710.262 | 0.030682   | 0.652050398    | 0.872703049 |
| 962.2395 | 910.3962 | 904.3851 | -0.07499   | 0.835449534    | 0.722021255 |
| 575.3781 | 601.0473 | 569.0395 | -0.13597   | 0.870174956    | 0.582412098 |
| 98.27887 | 83.60782 | 96.41185 | -0.06467   | 0.512918953    | 0.922101817 |
| 1425.937 | 1425.978 | 1425.219 | -0.00147   | 0.182950095    | 0.99985654  |
| 296.6235 | 200.6588 | 245.2214 | 0.37202    | 0.325505488    | 0.271247752 |
| 2741.087 | 2803.649 | 2989.815 | 0.237361   | 0.9788673      | 0.156915071 |
| 291.2628 | 250.8235 | 313.3385 | -0.19038   | 0.767697372    | 0.484464564 |
| 5167.682 | 5208.767 | 5099.349 | 0.006178   | 0.617661583    | 0.973599965 |
| 440.468  | 376.2352 | 368.8801 | -0.28998   | 0.515985444    | 0.142939621 |
| 599.5011 | 675.3654 | 716.8011 | 0.287595   | 0.451912698    | 0.237500588 |
| 193.8774 | 160.7128 | 195.9676 | -0.35433   | 0.307232061    | 0.129766751 |
| 191.1971 | 234.1019 | 348.969  | -0.24175   | 0.917641799    | 0.519070487 |
| 1517.068 | 1542.1   | 1576.124 | -0.03493   | 0.783200259    | 0.834432692 |
| 1431.298 | 1412.043 | 1346.622 | 0.211223   | 0.469683278    | 0.285769191 |
| 3697.072 | 3879.403 | 3976.989 | 0.194623   | 0.836962769    | 0.253693985 |
| 410.9844 | 418.0391 | 362.5924 | -0.44437   | 0.288884373    | 0.017692756 |
| 520.878  | 471.9197 | 492.5388 | 0.072468   | 0.842165531    | 0.767228242 |
| 716.5423 | 742.2516 | 703.1777 | -0.06416   | 0.956452433    | 0.737455632 |
| 15.18855 | 24.15337 | 11.5275  | -0.48472   | 0.882494351 NA |             |
| 367.2056 | 382.738  | 311.2426 | -0.28208   | 0.15308256     | 0.189524038 |
| 283.2218 | 254.5394 | 255.701  | -0.1345    | 0.187619163    | 0.669189286 |
| 481.5665 | 577.8229 | 521.8815 | 0.165652   | 0.854862911    | 0.394829397 |
| 1059.625 | 1091.547 | 1122.36  | 0.01214    | 0.907551741    | 0.953867552 |
| 0        | 0        | 0        | #DIV/0! NA | NA             |             |
| 76.83621 | 87.32372 | 103.7475 | -0.16765   | 0.16816951     | 0.709172058 |
| 1419.683 | 1523.52  | 1549.925 | -0.14811   | 0.622402254    | 0.36518668  |
| 742.4522 | 744.1096 | 750.3357 | -0.03675   | 0.836327255    | 0.8721296   |
| 865.7475 | 821.2146 | 812.165  | 0.292712   | 0.886112674    | 0.083745142 |
| 373.4597 | 388.3119 | 399.2708 | -0.07003   | 0.187509131    | 0.789143179 |
| 608.4355 | 629.8456 | 662.3075 | 0.126222   | 0.136068446    | 0.59372632  |
| 251.0578 | 258.2553 | 312.2906 | 0.040528   | 0.503721512    | 0.901090975 |
| 727.2636 | 728.317  | 825.7885 | 0.255045   | 0.228465218    | 0.136895784 |
| 6894.709 | 6798.245 | 5704.018 | 0.04943    | 0.094605412    | 0.859505388 |
| 4304.614 | 4226.84  | 4685.406 | -0.12598   | 0.854862911    | 0.41069386  |

|          |          |          |          |             |             |
|----------|----------|----------|----------|-------------|-------------|
| 542.3207 | 482.1384 | 453.7645 | 0.226853 | 0.504834011 | 0.549888611 |
| 496.755  | 510.9367 | 430.7095 | 0.13975  | 0.363948776 | 0.549697898 |
| 2079.045 | 2081.835 | 1876.887 | 0.153622 | 0.231792531 | 0.554207814 |
| 4936.28  | 4916.14  | 4725.229 | 0.020324 | 0.842190796 | 0.919912874 |
| 83.09032 | 65.0283  | 30.39069 | -0.11384 | 0.849658023 | 0.885571199 |
| 2554.357 | 2700.533 | 2388.289 | 0.170239 | 0.159784266 | 0.377946785 |
| 1370.543 | 1404.611 | 1225.059 | -0.20418 | 0.509444319 | 0.244049419 |
| 4242.073 | 4559.413 | 4351.109 | -0.00648 | 0.515985444 | 0.969852341 |
| 1602.839 | 1757.622 | 1790.955 | 0.133578 | 0.794232621 | 0.579998211 |
| 2686.587 | 2589.055 | 3002.391 | -0.21446 | 0.90421043  | 0.231736184 |
| 3355.777 | 3313.657 | 3068.412 | -0.02581 | 0.004275303 | 0.914120833 |
| 729.0505 | 774.7658 | 678.0268 | -0.23854 | 0.944990108 | 0.200449188 |
| 1266.011 | 1291.276 | 1476.568 | -0.01012 | 0.216768104 | 0.975406172 |
| 1743.11  | 1718.605 | 1605.467 | 0.198249 | 0.960823113 | 0.220390487 |
| 482.4599 | 516.5105 | 467.3879 | 0.004369 | 0.584647995 | 0.996316779 |
| 498.5419 | 504.4338 | 497.7786 | 0.030278 | 0.950721216 | 0.91372954  |
| 5798.453 | 5753.147 | 5704.018 | -0.06558 | 0.937354907 | 0.593866078 |
| 25.01644 | 26.9403  | 16.76728 | 0.004701 | 0.730407446 | NA          |
| 617.37   | 562.0303 | 726.2327 | 0.004315 | 0.44116367  | 0.996992829 |
| 843.4114 | 896.4616 | 853.0353 | 0.061699 | 0.394573102 | 0.803458765 |
| 424.386  | 443.1214 | 433.8533 | -0.01091 | 0.901380807 | 0.975406172 |
| 117.0412 | 120.7668 | 106.8914 | -0.08225 | 0.779325825 | 0.847133587 |
| 1465.249 | 1583.904 | 1698.735 | -0.15196 | 0.00628885  | 0.542805648 |
| 2205.02  | 2057.681 | 2011.025 | 0.220743 | 0.43882432  | 0.140495882 |
| 34.84433 | 41.80391 | 59.73343 | -0.90567 | 0.798439173 | 0.137586476 |
| 162.6069 | 167.2156 | 209.591  | 0.48431  | 0.084787806 | 0.232634698 |
| 1.786889 | 1.857952 | 7.335684 | 0.474655 | 0.960823113 | NA          |
| 433.3205 | 426.3999 | 576.3752 | 0.616869 | 0.156929518 | 0.009798351 |
| 158.1396 | 206.2326 | 203.3032 | 0.30025  | 0.92288341  | 0.630318178 |
| 721.903  | 588.9706 | 693.7461 | -0.34625 | 1.59768E-16 | 0.056918147 |
| 499.4353 | 434.7607 | 516.6418 | -0.30145 | 0.186095147 | 0.238463934 |
| 244.8037 | 237.8178 | 204.3512 | 0.359778 | 0.747302666 | 0.253751822 |
| 50.92632 | 30.6562  | 31.43865 | 0.828362 | 0.855606042 | NA          |
| 584.3125 | 573.178  | 597.3343 | -0.07483 | 0.050113237 | 0.740018919 |
| 423.4926 | 428.2578 | 456.9083 | 0.135849 | 0.524923966 | 0.564967632 |
| 819.2884 | 763.6181 | 845.6996 | 0.13537  | 0.032527447 | 0.542081593 |
| 4359.115 | 4367.115 | 4955.779 | 0.061268 | 0.746491819 | 0.725549438 |
| 1363.396 | 1287.56  | 1328.807 | -0.25799 | 0.276391642 | 0.130436078 |
| 944.3706 | 1007.01  | 904.3851 | 0.228995 | 0.662090696 | 0.205984307 |
| 222.4676 | 160.7128 | 230.5501 | -0.0399  | 0.183178382 | 0.923910484 |
| 362.7384 | 389.2408 | 431.7574 | -0.02173 | 0.336152763 | 0.925909288 |
| 460.1238 | 449.6243 | 510.354  | -0.30034 | 0.39778623  | 0.13251575  |
| 4333.205 | 4135.8   | 4451.712 | 0.091791 | 0.860359707 | 0.656215943 |
| 897.018  | 879.74   | 1021.756 | 0.099741 | 0.864963799 | 0.686807001 |
| 4241.18  | 3869.184 | 3970.701 | 0.048541 | 0.429722241 | 0.746009092 |
| 1589.437 | 1757.622 | 1861.168 | 0.047284 | 0.732140966 | 0.824432784 |
| 864.854  | 849.0838 | 859.323  | 0.090393 | 0.395100931 | 0.730853476 |
| 1952.176 | 1806.858 | 1764.756 | -0.00862 | 0.826883467 | 0.971886993 |
| 1126.633 | 919.686  | 889.7137 | 0.124007 | 0.963574889 | 0.616511903 |
| 955.9854 | 800.7771 | 1036.427 | -0.2625  | 0.077927263 | 0.18366757  |
| 109.0002 | 88.2527  | 124.7066 | -0.12749 | 0.410903637 | 0.826468162 |
| 1544.765 | 1588.549 | 1911.47  | -0.01482 | 0.872444605 | 0.956290296 |
| 7282.464 | 7623.175 | 7372.363 | 0.008829 | 0.000468039 | 0.971658868 |
| 976.5346 | 1146.356 | 905.433  | 0.248342 | 0.637435429 | 0.138224336 |

|          |          |          |          |             |             |
|----------|----------|----------|----------|-------------|-------------|
| 348.4433 | 288.9115 | 325.914  | 0.26331  | 0.312218414 | 0.273534982 |
| 2978.743 | 3144.583 | 2701.628 | 0.258841 | 0.775422074 | 0.26142392  |
| 336.8285 | 393.8857 | 303.9069 | 0.09962  | 0.2795135   | 0.771436828 |
| 4.467221 | 3.715903 | 0        | 0.234721 | 0.365953812 | NA          |
| 993.51   | 977.2825 | 1255.45  | -0.19844 | 0.026312287 | 0.387451456 |
| 362.7384 | 343.721  | 334.2976 | 0.188987 | 0.490813332 | 0.470895778 |
| 754.067  | 679.0813 | 583.7109 | 0.297841 | 0.910345048 | 0.208318412 |
| 1332.125 | 1382.316 | 1288.985 | 0.08821  | 0.156349661 | 0.622128808 |
| 5324.928 | 5192.046 | 5306.844 | -0.00303 | 0.569590917 | 0.990023409 |
| 2488.242 | 2458.999 | 2305.501 | 0.027175 | 0.206702304 | 0.889811144 |
| 2375.668 | 2196.099 | 2526.619 | 0.039736 | 0.310443697 | 0.853437613 |
| 723.6898 | 656.7859 | 580.567  | -0.01117 | 0.206816173 | 0.966582892 |
| 10395.22 | 9891.734 | 8655.059 | 0.198273 | 0.084784548 | 0.321405678 |
| 1158.797 | 1248.543 | 1214.58  | 0.048708 | 0.004149955 | 0.80286002  |
| 0.893444 | 0        | 0        | -0.91651 | NA          | NA          |
| 2870.636 | 3047.04  | 2662.853 | 0.170144 | 0.764235559 | 0.392881614 |
| 721.903  | 717.1693 | 765.0071 | 0.051358 | 0.843507519 | 0.809054023 |
| 108.1068 | 91.03962 | 121.5628 | -0.43756 | 0.863207554 | 0.212919918 |
| 22332.53 | 21516.94 | 21928.46 | -0.20067 | 0.958449073 | 0.237500588 |
| 537.8534 | 458.914  | 448.5247 | 0.566816 | 0.322090293 | 0.04830568  |
| 593.247  | 516.5105 | 601.5261 | 0.049752 | 0.944840582 | 0.875604624 |
| 47.35255 | 45.51981 | 31.43865 | 0.513224 | 0.817609984 | 0.379845684 |
| 1446.486 | 1456.634 | 1337.19  | 0.133685 | 0.907095813 | 0.443509781 |
| 602.1814 | 629.8456 | 572.1834 | 0.000187 | 0.32066134  | 0.996992829 |
| 193.8774 | 201.5877 | 253.6051 | -0.43834 | 0.717185827 | 0.092469287 |
| 1379.478 | 1374.884 | 1451.418 | -0.13543 | 0.990604058 | 0.484964546 |
| 295.73   | 313.0648 | 335.3456 | 0.154679 | 0.185572017 | 0.557712736 |
| 1108.764 | 1262.478 | 1211.436 | -0.0533  | 0.041683941 | 0.795655341 |
| 337.7219 | 318.6387 | 373.0719 | -0.18486 | 0.999199613 | 0.511678067 |
| 605.7552 | 681.8682 | 780.7264 | -0.01889 | 0.660114316 | 0.948840677 |
| 1255.289 | 1198.379 | 1192.573 | -0.02085 | 0.628362657 | 0.923910484 |
| 323.4268 | 322.3546 | 402.4147 | 0.0399   | 0.518074182 | 0.914120833 |
| 186.7298 | 224.8121 | 226.3583 | 0.197867 | 0.39473091  | 0.564516422 |
| 448.509  | 484.9253 | 514.5459 | 0.250663 | 0.089410503 | 0.733530443 |
| 535.1731 | 480.2805 | 483.1072 | 0.149233 | 0.094200573 | 0.437989627 |
| 176.902  | 198.8008 | 216.9267 | -0.13471 | 0.098330299 | 0.729293105 |
| 524.4518 | 588.9706 | 658.1157 | -0.22388 | 0.885070844 | 0.348491003 |
| 27.69677 | 42.73289 | 20.9591  | 0.331807 | 0.28287487  | NA          |
| 3923.114 | 3969.513 | 4205.443 | -0.00993 | 0.974211326 | 0.964166603 |
| 461.9107 | 418.0391 | 446.4288 | -0.43366 | 0.287050142 | 0.009798351 |
| 3570.203 | 3530.108 | 3618.588 | 0.045308 | 0.82365137  | 0.764996976 |
| 365.4187 | 357.6557 | 429.6615 | 0.215957 | 0.847714103 | 0.408353147 |
| 89.34443 | 72.46011 | 102.6996 | -0.00781 | 0.976661259 | 0.99985654  |
| 3.573777 | 0        | 2.09591  | -0.08334 | NA          | NA          |
| 475.3123 | 497.931  | 599.4302 | -0.27886 | 0.637486498 | 0.129766751 |
| 2013.823 | 1767.841 | 1747.989 | 0.251416 | 0.344730624 | 0.143052735 |
| 2347.972 | 2202.602 | 2161.931 | 0.045313 | 0.151730694 | 0.818645356 |
| 537.8534 | 547.1667 | 453.7645 | 0.200088 | 0.840099446 | 0.333065318 |
| 137.5904 | 137.4884 | 124.7066 | 0.554886 | 0.873487899 | 0.089996507 |
| 492.2878 | 488.6413 | 459.0042 | 0.351557 | 0.896727268 | 0.046180368 |
| 318.9596 | 267.545  | 208.543  | 0.310869 | 0.832043227 | 0.266775275 |
| 224.2545 | 250.8235 | 209.591  | 0.273972 | 0.907472172 | 0.394829397 |
| 1048.904 | 1012.584 | 950.4951 | 0.137714 | 0.015463986 | 0.56624122  |
| 1660.019 | 1632.21  | 1678.824 | 0.020542 | 0.80107822  | 0.904467867 |

|          |          |          |          |             |             |
|----------|----------|----------|----------|-------------|-------------|
| 358.2711 | 256.3973 | 306.0028 | 0.241225 | 0.848694292 | 0.421538281 |
| 4133.073 | 4193.397 | 3581.91  | 0.159777 | 0.380779612 | 0.422793542 |
| 921.141  | 1019.086 | 972.5021 | -0.19558 | 0.56870053  | 0.247307157 |
| 1692.183 | 1755.764 | 1759.516 | -0.09135 | 0.115119266 | 0.583691606 |
| 3635.425 | 3675.028 | 3618.588 | -0.12744 | 0.219675312 | 0.318625647 |
| 484.2468 | 498.86   | 470.5317 | 0.220525 | 0.500344775 | 0.269882397 |
| 727.2636 | 876.0241 | 877.1382 | 0.035084 | 0.919200531 | 0.896670492 |
| 1898.569 | 1926.696 | 1470.281 | 0.215225 | 0.491320652 | 0.402165869 |
| 780.8703 | 886.2429 | 871.8985 | -0.1126  | 0.484084014 | 0.5608115   |
| 1650.192 | 1703.742 | 1878.983 | -0.27763 | 0.275860802 | 0.054657929 |
| 355.5908 | 412.4652 | 313.3385 | -0.65368 | 0.836962769 | 0.001622235 |
| 749.5997 | 659.5728 | 676.9789 | 0.390321 | 0.587719544 | 0.014777529 |
| 1121.273 | 1142.64  | 1050.051 | 0.194649 | 0.920564616 | 0.342128545 |
| 509.2632 | 528.5872 | 674.883  | -0.41507 | 0.270719269 | 0.026149665 |
| 2067.43  | 2064.184 | 2075.999 | -0.00646 | 0.05082493  | 0.974691849 |
| 1064.092 | 961.4899 | 780.7264 | 0.240407 | 0.021160717 | 0.439957542 |
| 5.360666 | 15.79259 | 5.239774 | -0.67902 | 0.935100162 | NA          |
| 257.3119 | 299.1302 | 298.6671 | 0.34728  | 0.826883467 | 0.207300547 |
| 732.6243 | 573.178  | 725.1848 | 0.053899 | 0.783200259 | 0.859505388 |
| 1743.11  | 1692.594 | 1747.989 | -0.25244 | 0.861141154 | 0.056859994 |
| 2608.857 | 2748.839 | 2386.193 | 0.073112 | 0.643482442 | 0.676538655 |
| 389.5417 | 348.3659 | 423.3738 | -0.24628 | 0.828016939 | 0.320138645 |
| 551.2551 | 531.3741 | 622.4852 | -0.37752 | 0.170962625 | 0.027155407 |
| 259.0988 | 280.5507 | 275.6121 | 0.148159 | 0.98409529  | 0.626829627 |
| 0.893444 | 9.289758 | 10.47955 | -0.12607 | NA          | NA          |
| 1056.051 | 1133.35  | 1140.175 | -0.11655 | 0.168770086 | 0.521135669 |
| 626.3044 | 638.2063 | 616.1975 | 0.069696 | 0.967934287 | 0.725153631 |
| 3894.524 | 3580.273 | 3330.401 | 0.052734 | 0.588304645 | 0.832900164 |
| 0        | 0        | 0        | #DIV/0!  | NA          | NA          |
| 147.4183 | 142.1333 | 229.5021 | -0.53425 | 0.441920545 | 0.083978449 |
| 130.4429 | 143.0623 | 114.2271 | -0.08679 | 0.582003857 | 0.855100406 |
| 1131.994 | 1002.365 | 1088.825 | 0.009515 | 0.950182379 | 0.965909471 |
| 1113.232 | 1104.552 | 1064.722 | 0.225361 | 0.394573102 | 0.131442568 |
| 438.6811 | 436.6186 | 531.3131 | 0.077702 | 0.753108802 | 0.832900164 |
| 1011.379 | 846.2969 | 809.0212 | 0.385377 | 0.747302666 | 0.163640813 |
| 836.2638 | 784.0555 | 715.7532 | 0.233358 | 0.685468572 | 0.217256598 |
| 479.7796 | 520.2264 | 500.9224 | -0.005   | 0.729944386 | 0.983593071 |
| 388.6483 | 379.0221 | 311.2426 | 0.251351 | 0.820906044 | 0.422560599 |
| 284.1153 | 319.5677 | 331.1537 | -0.29097 | 0.50823828  | 0.181725119 |
| 655.7881 | 690.229  | 621.4373 | 0.158148 | 0.858869281 | 0.406611401 |
| 1336.593 | 1540.242 | 1669.392 | -0.14309 | 0.484084014 | 0.377059311 |
| 27.69677 | 21.36644 | 24.10296 | 0.546063 | 0.433973714 | NA          |
| 1240.101 | 1373.955 | 1121.312 | 0.026955 | 0.434274199 | 0.923725803 |
| 881.8295 | 934.5496 | 866.6587 | -0.05674 | 0.265502165 | 0.79052565  |
| 3232.481 | 3027.532 | 3169.016 | 0.203386 | 0.156929518 | 0.149720105 |
| 874.6819 | 887.1719 | 940.0155 | -0.42578 | 0.587188155 | 0.000186998 |
| 4253.688 | 4240.774 | 3547.327 | -0.01786 | 0.000548797 | 0.93142242  |
| 427.0664 | 478.4225 | 448.5247 | -0.076   | 0.913212741 | 0.811374268 |
| 570.9109 | 536.948  | 604.67   | -0.06009 | 0.892614393 | 0.797980755 |
| 11850.64 | 12422.26 | 11577.81 | -0.12353 | 0.598960113 | 0.395957024 |
| 329.6809 | 384.596  | 377.2638 | 0.109124 | 0.841901206 | 0.684679019 |
| 0        | 0        | 0        | #DIV/0!  | NA          | NA          |
| 258.2054 | 155.139  | 232.646  | 0.269698 | 0.925116667 | 0.505493145 |
| 3262.858 | 3053.543 | 3029.638 | 0.214669 | 0.164920979 | 0.161107365 |

|          |          |          |          |             |             |
|----------|----------|----------|----------|-------------|-------------|
| 432.427  | 469.1328 | 503.0183 | -0.02919 | 0.785492922 | 0.929693512 |
| 9830.567 | 9485.772 | 10490.03 | -0.32434 | 0.673839005 | 0.012748693 |
| 1808.331 | 1845.875 | 1866.408 | 0.146381 | 0.769710962 | 0.33950184  |
| 37.52466 | 14.86361 | 25.15092 | 0.740292 | 0.985859213 | NA          |
| 1275.838 | 1232.751 | 1287.937 | -0.07005 | 0.769710962 | 0.724404377 |
| 542.3207 | 602.9053 | 504.0663 | -0.09718 | 0.981637588 | 0.73912962  |
| 1014.059 | 1165.865 | 1162.182 | 0.041972 | 0.921802179 | 0.838059844 |
| 264.4595 | 277.7638 | 333.2497 | -0.54558 | 0.396688154 | 0.003281665 |
| 1660.019 | 1552.318 | 1599.179 | -0.08636 | 0.963625684 | 0.556915963 |
| 1173.092 | 1212.313 | 1087.777 | -0.19473 | 0.197390524 | 0.229480039 |
| 1207.043 | 994.933  | 1152.75  | 0.041    | 0.465047544 | 0.875772383 |
| 2520.406 | 2260.198 | 2184.986 | 0.321408 | 0.335666342 | 0.161220563 |
| 1.786889 | 0        | 1.047955 | -1.47895 | NA          | NA          |
| 1003.338 | 1063.677 | 1043.763 | 0.205368 | 0.999122571 | 0.26142392  |
| 142.0576 | 176.5054 | 155.0973 | 0.06946  | 0.798439173 | 0.87466351  |
| 4258.155 | 4123.723 | 5096.205 | -0.38043 | 0.947527175 | 0.018979885 |
| 1.786889 | 0        | 5.239774 | #DIV/0!  | NA          | NA          |
| 4282.278 | 4353.18  | 4647.68  | -0.01763 | 0.881060269 | 0.923910484 |
| 653.1078 | 714.3824 | 528.1693 | 0.21629  | 0.934554042 | 0.42381604  |
| 56.28699 | 73.38909 | 105.8434 | 0.044562 | 0.735300868 | 0.960357548 |
| 61.64765 | 48.30674 | 52.39774 | -0.82706 | 0.394743874 | 0.04089481  |
| 368.9925 | 367.8744 | 382.5035 | 0.292392 | 0.981637588 | 0.169257941 |
| 1559.06  | 1799.426 | 1686.159 | -0.124   | 0.12559908  | 0.457073409 |
| 561.083  | 573.178  | 656.0198 | 0.019286 | 0.903964934 | 0.94960537  |
| 117.9346 | 113.335  | 112.1312 | 0.237789 | 0.888097311 | 0.563424525 |
| 1259.756 | 1198.379 | 1043.763 | 0.223579 | 0.956797855 | 0.223810637 |
| 944.3706 | 1046.027 | 880.2821 | -0.00131 | 0.311074517 | 0.996992829 |
| 1727.028 | 1864.454 | 1487.048 | 0.195294 | 0.331098637 | 0.443864778 |
| 777.2965 | 748.7545 | 649.732  | 0.167273 | 0.643355604 | 0.620471139 |
| 2606.177 | 2811.081 | 2975.144 | -0.09333 | 0.839737561 | 0.621036339 |
| 4050.876 | 4010.388 | 4604.714 | -0.08827 | 0.861136809 | 0.649685593 |
| 1710.946 | 1800.355 | 1524.774 | 0.308006 | 0.134933146 | 0.020590928 |
| 0        | 0        | 0        | #DIV/0!  | NA          | NA          |
| 998.8707 | 1006.081 | 783.8703 | 0.258386 | 0.247657122 | 0.161220563 |
| 622.7306 | 565.7462 | 643.4443 | -0.06325 | 0.580755221 | 0.769874588 |
| 1036.395 | 1159.362 | 1153.798 | -0.13465 | 0.193381894 | 0.407722648 |
| 1037.289 | 916.8991 | 847.7955 | 0.43654  | 0.30979442  | 0.054657929 |
| 2.680333 | 5.573855 | 13.62341 | 0.778674 | 0.78204194  | NA          |
| 25.01644 | 15.79259 | 37.72638 | 0.987019 | 0.081926061 | NA          |
| 499.4353 | 555.5275 | 610.9577 | -0.09794 | 0.784189637 | 0.681942449 |
| 141.1642 | 190.44   | 130.9944 | 0.283624 | 0.592574853 | 0.565559013 |
| 2779.505 | 2662.445 | 2878.732 | 0.266295 | 0.584804307 | 0.0786728   |
| 28.59022 | 39.01698 | 32.4866  | 0.2576   | 0.92280023  | NA          |
| 1540.298 | 1589.478 | 1426.267 | 0.037395 | 0.520356385 | 0.836904079 |
| 508.3698 | 452.4112 | 367.8322 | -0.04489 | 0.663061022 | 0.899561084 |
| 735.3046 | 653.07   | 695.842  | -0.03987 | 0.856763291 | 0.885866808 |
| 5440.182 | 5245.926 | 5162.226 | -0.01153 | 0.211634187 | 0.950246349 |
| 409.1975 | 492.3572 | 383.5515 | 0.37129  | 0.302288037 | 0.122997082 |
| 1131.1   | 1194.663 | 1135.983 | 0.407352 | 0.933668895 | 0.001916809 |
| 985.469  | 1137.066 | 1068.914 | 0.000264 | 0.783200259 | 0.996720771 |
| 745.1325 | 666.0756 | 807.9732 | -0.33491 | 0.493325129 | 0.054657929 |
| 12.50822 | 12.07668 | 14.67137 | 0.569514 | 0.820906044 | NA          |
| 1244.568 | 1403.682 | 1456.657 | -0.08094 | 0.66770133  | 0.73912962  |
| 871.1082 | 792.4163 | 807.9732 | -0.0398  | 0.730407446 | 0.859505388 |

|          |          |          |             |                |             |
|----------|----------|----------|-------------|----------------|-------------|
| 350.2301 | 401.3175 | 384.5994 | 0.281641    | 0.434940845    | 0.280613898 |
| 1080.174 | 1129.635 | 980.8858 | 0.110379    | 0.106967826    | 0.542805648 |
| 4653.951 | 4505.532 | 5112.972 | -0.41879    | 0.380570392    | 2.68458E-06 |
| 480.673  | 592.6865 | 576.3752 | 0.009688    | 0.239965637    | 0.972140885 |
| 1073.92  | 1141.711 | 1025.948 | -0.02928    | 0.108410382    | 0.884337789 |
| 922.9279 | 903.8934 | 1013.372 | 0.227473    | 0.812875146    | 0.252689545 |
| 3338.801 | 3702.897 | 3451.963 | -0.00064    | 0.187777748    | 0.99985654  |
| 603.0749 | 680.9392 | 784.9182 | -0.15277    | 0.820906044    | 0.605782742 |
| 5.360666 | 4.644879 | 17.81523 | 0.768277 NA | NA             |             |
| 972.9608 | 977.2825 | 893.9055 | -0.09723    | 0.02392532     | 0.646200858 |
| 700.4603 | 617.7689 | 620.3893 | -0.00181    | 0.8315774      | 0.997694701 |
| 515.5173 | 569.4621 | 631.9168 | 0.124824    | 0.720937669    | 0.667557921 |
| 545.8944 | 454.2691 | 521.8815 | -0.56409    | 0.827268091    | 0.002810557 |
| 786.2309 | 684.6551 | 820.5487 | -0.23964    | 0.708011334    | 0.208318412 |
| 470.8451 | 397.6016 | 517.6897 | 0.208863    | 0.760267849    | 0.538616173 |
| 12115.1  | 12010.73 | 11662.69 | 0.028034    | 0.412665866    | 0.826228143 |
| 1623.388 | 1559.75  | 1655.769 | 0.024358    | 0.092299784    | 0.884584155 |
| 1014.059 | 1013.513 | 1248.114 | -0.0405     | 0.043065691    | 0.914553818 |
| 573.5912 | 653.07   | 805.8773 | -0.42792    | 0.394915233    | 0.022699188 |
| 2036.159 | 1884.892 | 1954.436 | -0.09193    | 0.455042454    | 0.665181522 |
| 0        | 1.857952 | 3.143865 | -1.60143    | 0.950742266 NA |             |
| 410.0909 | 491.4282 | 565.8956 | -0.29178    | 0.683062991    | 0.210155633 |
| 5113.181 | 5157.673 | 5232.439 | 0.074991    | 0.229123467    | 0.567449963 |
| 256.4185 | 278.6927 | 343.7292 | -0.13317    | 0.347941211    | 0.66509742  |
| 0        | 0        | 0        | #DIV/0! NA  | NA             |             |
| 768.3621 | 744.1096 | 613.0536 | 0.208565    | 0.387883832    | 0.36518668  |
| 185.8364 | 152.352  | 187.5839 | -0.35728    | 0.257353068    | 0.201829761 |
| 763.0014 | 822.1435 | 816.3569 | 0.024898    | 0.209444421    | 0.947221243 |
| 2811.669 | 2682.882 | 2571.681 | 0.116678    | 0.914164397    | 0.494034305 |
| 1298.175 | 1326.577 | 1360.245 | -0.32036    | 0.208221128    | 0.076250172 |
| 2590.988 | 2601.132 | 2150.403 | 0.384387    | 0.211501936    | 0.073051917 |
| 524.4518 | 605.6922 | 540.7447 | -0.00764    | 0.934554042    | 0.979820281 |
| 2797.374 | 2855.671 | 2974.096 | 0.011034    | 0.854862911    | 0.94960537  |
| 4603.025 | 4578.922 | 4496.774 | 0.248487    | 0.425091186    | 0.137779465 |
| 2285.43  | 2098.556 | 2520.332 | -0.08707    | 0.904254847    | 0.649408519 |
| 1352.675 | 1281.987 | 1235.539 | 0.300257    | 0.696064091    | 0.064216598 |
| 0        | 0        | 0        | #DIV/0! NA  | NA             |             |
| 153.6724 | 182.0792 | 173.9605 | 0.456476    | 0.46017679     | 0.110990341 |
| 426.1729 | 429.1868 | 426.5176 | 0.135618    | 0.902390281    | 0.575970418 |
| 2048.668 | 2304.789 | 1982.731 | 0.04874     | 0.981637588    | 0.79799583  |
| 647.7471 | 653.07   | 518.7377 | 0.054342    | 0.973922065    | 0.86344732  |
| 426.1729 | 445.9084 | 591.0466 | -0.22254    | 0.478079371    | 0.333065318 |
| 469.9517 | 436.6186 | 438.0451 | 0.162594    | 0.871801928    | 0.420331471 |
| 5924.429 | 5679.758 | 6351.655 | 0.252341    | 0.962011634    | 0.027121839 |
| 1029.248 | 955.9161 | 1121.312 | -0.15065    | 0.92790798     | 0.361214706 |
| 146.5249 | 142.1333 | 163.481  | 0.105286    | 0.831928191    | 0.764996976 |
| 823.7556 | 835.1492 | 708.4175 | 0.383202    | 0.599504319    | 0.150109736 |
| 302.8776 | 401.3175 | 400.3188 | -0.21449    | 0.045014426    | 0.468420234 |
| 612.0093 | 720.8852 | 670.6911 | 0.120951    | 0.900383854    | 0.583691606 |
| 186.7298 | 160.7128 | 237.8858 | 0.111006    | 0.824111765    | 0.786995178 |
| 2843.833 | 3056.33  | 2788.608 | 0.125019    | 0.175845813    | 0.387856411 |
| 1467.035 | 1422.262 | 1303.656 | 0.461267    | 0.363948776    | 0.280613898 |
| 846.9852 | 786.8425 | 734.6164 | 0.079891    | 0.79861807     | 0.732126215 |
| 3567.523 | 3610.929 | 3273.811 | 0.005066    | 0.031159       | 0.975879427 |

| 0        | 0        | 0        | #DIV/0!  | NA          | NA          |  |
|----------|----------|----------|----------|-------------|-------------|--|
| 41.09844 | 79.89192 | 97.45981 | -0.84166 | 0.070750961 | 0.150320193 |  |
| 12619.01 | 12149.15 | 13863.4  | -0.46284 | 0.670790001 | 0.000187867 |  |
| 7182.398 | 7166.119 | 7377.602 | -0.03834 | 0.162448502 | 0.772252375 |  |
| 384.181  | 417.1101 | 373.0719 | -0.1958  | 0.474093273 | 0.328075371 |  |
| 964.0264 | 809.1379 | 879.2342 | 0.193361 | 0.633808524 | 0.497467758 |  |
| 2655.316 | 2535.175 | 2502.516 | 0.12101  | 0.86365129  | 0.384595188 |  |
| 909.5263 | 810.0669 | 904.3851 | 0.024457 | 0.804201321 | 0.922828908 |  |
| 5.360666 | 4.644879 | 4.19182  | -1.16926 | NA          |             |  |
| 722.7964 | 759.9022 | 741.9521 | 0.05486  | 0.43839941  | 0.7932398   |  |
| 6956.357 | 6736.003 | 7675.222 | -0.20919 | 0.384189305 | 0.177690671 |  |
| 2569.546 | 2737.692 | 2655.518 | -0.13538 | 0.802471571 | 0.487331989 |  |
| 38.4181  | 46.44879 | 52.39774 | 0.019619 | 0.914796531 | NA          |  |
| 1609.093 | 1616.418 | 1456.657 | 0.180328 | 0.432618079 | 0.374236525 |  |
| 2730.366 | 2656.871 | 2988.767 | -0.17747 | 0.267258978 | 0.343625666 |  |
| 3576.457 | 3672.241 | 3462.443 | -0.04135 | 0.694473591 | 0.794422811 |  |
| 821.9687 | 866.7344 | 803.7814 | 0.113048 | 0.444234906 | 0.710509604 |  |
| 30.3771  | 27.86927 | 37.72638 | -0.59854 | 0.935960933 | 0.318625647 |  |
| 6.25411  | 3.715903 | 9.431594 | -0.1931  | 0.856745942 | NA          |  |
| 30.3771  | 27.86927 | 17.81523 | -0.47339 | 0.73478662  | 0.567139643 |  |
| 1328.552 | 1479.858 | 1391.684 | -0.03181 | 0.651759792 | 0.896567419 |  |
| 229.6152 | 243.3916 | 225.3103 | 0.184178 | 0.986125936 | 0.525310286 |  |
| 1115.018 | 1102.694 | 951.543  | -0.07018 | 0.960823113 | 0.796040638 |  |
| 1.786889 | 0        | 1.047955 | -1.50799 | NA          |             |  |
| 340.4023 | 401.3175 | 367.8322 | 0.197617 | 0.842806932 | 0.483238043 |  |
| 12.50822 | 3.715903 | 8.383639 | -1.18933 | 0.237605221 | NA          |  |
| 14.29511 | 24.15337 | 29.34274 | 0.192348 | 0.716063981 | NA          |  |
| 549.4682 | 678.1523 | 810.0691 | -0.0784  | 0.861070915 | 0.81251428  |  |
| 88.45098 | 52.95162 | 116.323  | -1.00667 | 0.767300341 | 0.002249649 |  |
| 1345.527 | 1265.265 | 1249.162 | -0.04261 | 0.574512226 | 0.838059844 |  |
| 1224.912 | 1265.265 | 1258.594 | 0.080131 | 0.153105196 | 0.647435632 |  |
| 40.20499 | 30.6562  | 44.01411 | -0.21242 | 0.010566322 | 0.765789524 |  |
| 1105.191 | 995.862  | 992.4133 | 0.165986 | 0.854862911 | 0.361564535 |  |
| 0        | 0        | 0        | #DIV/0!  | NA          |             |  |
| 404.7302 | 345.579  | 368.8801 | 0.022775 | 0.995598118 | 0.929693512 |  |
| 51.81977 | 33.44313 | 67.06911 | -0.20517 | 0.033849408 | 0.797601985 |  |
| 5945.872 | 5964.953 | 6230.092 | 0.083426 | 0.138269747 | 0.549038919 |  |
| 525.3452 | 500.7179 | 442.237  | 0.221122 | 0.399767691 | 0.36518668  |  |
| 278.7546 | 261.9712 | 273.5162 | -0.11767 | 0.230402467 | 0.718291318 |  |
| 394.0089 | 415.2522 | 409.7504 | 0.164662 | 0.872444605 | 0.422560599 |  |
| 5419.633 | 5208.767 | 5561.497 | -0.06558 | 0.859974619 | 0.65282506  |  |
| 67.00832 | 86.39475 | 82.78844 | -0.713   | 0.522361449 | 0.017202731 |  |
| 2.680333 | 3.715903 | 7.335684 | -0.05629 | NA          |             |  |
| 25.90988 | 18.57952 | 34.58251 | -0.68225 | 0.746491819 | NA          |  |
| 1.786889 | 0        | 2.09591  | 0.203136 | NA          |             |  |
| 1526.003 | 1472.427 | 1315.183 | 0.045687 | 0.940099788 | 0.818055883 |  |
| 4803.156 | 4302.087 | 4343.773 | 0.003891 | 0.276280221 | 0.987875073 |  |
| 25.90988 | 68.74421 | 44.01411 | -0.06393 | 0.34814074  | 0.941511899 |  |
| 2.680333 | 2.786927 | 2.09591  | -0.54908 | NA          |             |  |
| 95.59854 | 100.3294 | 67.06911 | 0.180311 | 0.992476114 | 0.746837826 |  |
| 3298.596 | 3253.273 | 3021.254 | 0.256899 | 0.072365168 | 0.161220563 |  |
| 542.3207 | 668.8625 | 519.7856 | 0.263274 | 0.412070549 | 0.277548691 |  |
| 1815.479 | 1664.725 | 1613.851 | 0.259626 | 0.539994787 | 0.244756568 |  |
| 172.4347 | 157.9259 | 180.2482 | 0.350596 | 0.981394188 | 0.332544931 |  |



|          |          |          |          |             |             |
|----------|----------|----------|----------|-------------|-------------|
| 1340.166 | 1249.472 | 1484.952 | 0.163668 | 0.250094568 | 0.39900629  |
| 18.76233 | 15.79259 | 17.81523 | 1.014539 | 0.734144448 | NA          |
| 47.35255 | 32.51415 | 54.49365 | -0.28589 | 0.731963541 | 0.656368654 |
| 18.76233 | 26.01132 | 24.10296 | 0.519337 | 0.813154117 | NA          |
| 868.4278 | 910.3962 | 900.1933 | 0.013269 | 0.792137512 | 0.961026715 |
| 3370.965 | 3483.659 | 3331.449 | 0.035419 | 0.670790001 | 0.82991092  |
| 1070.346 | 1173.296 | 978.7899 | 0.130944 | 0.92288341  | 0.655129754 |
| 4378.77  | 4023.394 | 3833.419 | 0.057284 | 0.597827152 | 0.755018053 |
| 564.6568 | 533.2321 | 512.4499 | 0.204381 | 0.559595899 | 0.647117771 |
| 1533.15  | 1503.083 | 1404.26  | -0.15324 | 0.024042196 | 0.357987739 |
| 848.772  | 813.7828 | 741.9521 | 0.129094 | 0.991136341 | 0.547201181 |
| 757.6407 | 842.581  | 838.3639 | 0.036872 | 0.590474301 | 0.875604624 |
| 1849.43  | 1838.443 | 1649.481 | 0.22019  | 0.302288037 | 0.0852812   |
| 3202.998 | 3270.924 | 3111.378 | -0.24813 | 0.366033665 | 0.088369497 |
| 605.7552 | 598.2604 | 691.6502 | 0.030933 | 0.842190796 | 0.906493978 |
| 209.9594 | 187.6531 | 232.646  | 0.048658 | 0.714978777 | 0.908612163 |
| 25991.19 | 25875.69 | 26637.97 | -0.35055 | 0.933496228 | 0.000652328 |
| 797.8457 | 744.1096 | 845.6996 | -0.23361 | 0.805217464 | 0.224439117 |
| 12988.89 | 13304.79 | 13258.73 | -0.18349 | 0.231538797 | 0.087860617 |
| 492.2878 | 507.2208 | 527.1213 | 0.045072 | 0.941323092 | 0.862606323 |
| 1.786889 | 3.715903 | 3.143865 | -1.01635 | 0.614621507 | NA          |
| 4059.811 | 4141.374 | 4781.818 | -0.74159 | 0.947853941 | 1.88401E-07 |
| 712.0751 | 692.0869 | 662.3075 | 0.258675 | 0.960773888 | 0.162970478 |
| 15.18855 | 18.57952 | 15.71932 | -0.46125 | 0.919006495 | NA          |
| 836.2638 | 919.686  | 1011.276 | -0.35965 | 0.84819607  | 0.036487394 |
| 809.4605 | 774.7658 | 714.7052 | -0.16398 | 0.906767387 | 0.366628987 |
| 2795.587 | 2945.782 | 2574.825 | -0.18003 | 0.000906247 | 0.124906775 |
| 8351.023 | 8362.64  | 8111.171 | 8.62E-05 | 0.972082308 | 0.999234423 |
| 626.3044 | 620.5558 | 570.0875 | -0.00825 | 0.900789434 | 0.984451848 |
| 1806.544 | 1904.4   | 1623.282 | 0.154659 | 0.287237928 | 0.50961549  |
| 14403.21 | 13881.68 | 15069.59 | -0.04115 | 2.89616E-19 | 0.780864543 |
| 172.4347 | 207.1616 | 190.7278 | 0.251597 | 0.918350023 | 0.422793542 |
| 2224.676 | 2001.943 | 2317.028 | -0.44276 | 0.286635593 | 4.6512E-05  |
| 321.6399 | 315.8518 | 291.3315 | 0.353857 | 0.484865818 | 0.095730045 |
| 298.4104 | 308.42   | 322.7701 | 0.177858 | 0.612170686 | 0.562454643 |
| 984.5756 | 881.598  | 853.0353 | 0.006479 | 0.967693355 | 0.987413808 |
| 2585.628 | 2547.252 | 2440.687 | -0.05416 | 0.000701205 | 0.712630985 |
| 2176.43  | 1918.335 | 2270.918 | 0.008671 | 0.910682739 | 0.969852341 |
| 192.0905 | 182.0792 | 295.5233 | -0.40633 | 0.922937786 | 0.224223422 |
| 721.903  | 680.0103 | 847.7955 | -0.08177 | 0.389882185 | 0.704908984 |
| 985.469  | 846.2969 | 898.0973 | 0.18993  | 0.795376015 | 0.39908158  |
| 857.7065 | 894.6037 | 906.481  | 0.380265 | 0.429631603 | 0.072863991 |
| 1335.699 | 1277.342 | 1166.374 | 0.155755 | 0.455280748 | 0.452447922 |
| 2221.102 | 2269.488 | 2485.749 | 0.21447  | 0.69974305  | 0.13004175  |
| 413.6647 | 410.6073 | 397.1749 | -0.2434  | 0.733488302 | 0.201158042 |
| 1503.667 | 1529.094 | 1658.913 | 0.129167 | 0.342349862 | 0.423225223 |
| 106.3199 | 133.7725 | 132.0423 | -0.06692 | 0.09014688  | 0.872689474 |
| 3.573777 | 8.360782 | 0        | 0.015758 | NA          | NA          |
| 6069.167 | 5556.204 | 5810.91  | -0.17234 | 0.770381061 | 0.326388465 |
| 819.2884 | 834.2202 | 822.6446 | 0.174323 | 0.526872244 | 0.293268311 |
| 419.0254 | 456.1271 | 495.6827 | 0.198115 | 0.626106285 | 0.41069386  |
| 2351.545 | 2229.542 | 2083.334 | 0.262029 | 0.011540931 | 0.068011569 |
| 2609.751 | 2533.317 | 2320.172 | 0.140012 | 0.430461737 | 0.431825344 |
| 1205.256 | 1302.424 | 1288.985 | -0.08907 | 0.560453068 | 0.614824771 |

|          |          |          |          |             |             |
|----------|----------|----------|----------|-------------|-------------|
| 3042.178 | 3122.288 | 2923.794 | -0.09087 | 0.00628885  | 0.502754884 |
| 1484.011 | 1486.361 | 1636.906 | -0.15718 | 0.687794385 | 0.385380994 |
| 227.8283 | 242.4627 | 244.1735 | 0.241529 | 0.854862911 | 0.554806856 |
| 1323.191 | 1329.364 | 1473.425 | -0.07288 | 0.22234484  | 0.646200858 |
| 1725.241 | 1532.81  | 1637.953 | 0.103749 | 0.469683278 | 0.697184019 |
| 292.1563 | 281.4797 | 253.6051 | 0.091106 | 0.84337655  | 0.740018919 |
| 97.38542 | 110.5481 | 128.8985 | -0.0676  | 0.812875146 | 0.914949396 |
| 631.6651 | 618.6979 | 680.1227 | -0.10132 | 0.430461737 | 0.630402098 |
| 461.9107 | 413.3942 | 430.7095 | -0.3997  | 0.596065856 | 0.012414864 |
| 210.8528 | 234.1019 | 237.8858 | 0.249031 | 0.923364203 | 0.535221009 |
| 695.0996 | 806.351  | 839.4119 | 0.036344 | 0.101973806 | 0.884380405 |
| 19.65577 | 15.79259 | 19.91114 | -0.98048 | 0.434274199 | NA          |
| 1355.355 | 1333.08  | 1262.786 | 0.001764 | 0.279741714 | 0.992528568 |
| 818.3949 | 831.4333 | 962.0226 | -0.21058 | 0.324651337 | 0.311435996 |
| 6.25411  | 3.715903 | 7.335684 | -0.41538 | NA          | NA          |
| 39558.14 | 39491.69 | 36040.22 | -0.16836 | 0.521899793 | 0.267468464 |
| 7.147554 | 13.00566 | 12.57546 | 1.445878 | NA          | NA          |
| 993.51   | 1075.754 | 1097.209 | -0.03575 | 0.990604058 | 0.885866808 |
| 1604.626 | 1525.378 | 1412.643 | 0.164815 | 0.362417219 | 0.302912952 |
| 465.4845 | 492.3572 | 501.9704 | -0.10902 | 0.831439424 | 0.752683558 |
| 413.6647 | 430.1158 | 461.1002 | -0.40229 | 0.189917625 | 0.019146595 |
| 28700.11 | 28763.88 | 26895.76 | 0.196539 | 0.530365059 | 0.045640789 |
| 3225.334 | 3277.426 | 3121.858 | 0.188402 | 0.009905069 | 0.131130356 |
| 1207.937 | 1211.384 | 1256.498 | 0.226815 | 0.368034878 | 0.351041753 |
| 704.0341 | 715.3113 | 707.3696 | -0.09018 | 0.325126896 | 0.647117771 |
| 895.2311 | 968.9217 | 1159.038 | -0.52256 | 0.249113533 | 0.001069433 |
| 2545.423 | 2540.749 | 2829.478 | -0.07952 | 0.432073195 | 0.672052681 |
| 144.738  | 117.9799 | 160.3371 | 0.288321 | 0.925116667 | 0.539409857 |
| 581.6322 | 627.9876 | 625.6291 | 0.121361 | 0.44116367  | 0.579139814 |
| 369.8859 | 405.9624 | 490.4429 | 0.001159 | 0.371964696 | 0.996720771 |
| 2954.62  | 2998.734 | 2722.587 | 0.154524 | 0.147626297 | 0.422116695 |
| 1506.347 | 1525.378 | 1550.973 | -0.09444 | 0.981762093 | 0.612461786 |
| 329.6809 | 280.5507 | 380.4076 | -0.00813 | 0.827268091 | 0.990023409 |
| 597.7142 | 557.3855 | 471.5797 | 0.295548 | 0.262338145 | 0.252563103 |
| 1602.839 | 1562.537 | 1438.842 | 0.072568 | 0.950605067 | 0.730702561 |
| 2017.397 | 1857.952 | 1694.543 | 0.242371 | 0.0779973   | 0.317595626 |
| 1444.699 | 1207.668 | 1280.601 | -0.07823 | 0.451017634 | 0.738713732 |
| 960.4526 | 1033.021 | 970.4062 | 0.11006  | 0.94309735  | 0.549936538 |
| 3518.383 | 3714.045 | 3589.246 | -0.39702 | 0.886112674 | 0.017099575 |
| 205.4922 | 235.0309 | 223.2144 | 0.08698  | 0.029186964 | 0.81253834  |
| 76.83621 | 69.67318 | 114.2271 | 0.158404 | 0.766253365 | 0.783572702 |
| 10353.23 | 10300.48 | 9988.058 | 0.061082 | 0.233074614 | 0.643988563 |
| 3042.178 | 2788.785 | 2754.025 | 0.323761 | 0.139314666 | 0.002049784 |
| 5373.174 | 5154.887 | 5631.71  | 0.134475 | 0.419992784 | 0.207615914 |
| 454.7631 | 362.3005 | 435.9492 | 0.240816 | 0.866015481 | 0.298450788 |
| 442.2549 | 521.1554 | 594.1904 | 0.334329 | 0.831928191 | 0.153668434 |
| 475.3123 | 427.3289 | 421.2779 | -0.07791 | 0.619820968 | 0.831655346 |
| 645.0668 | 728.317  | 809.0212 | -0.24414 | 0.57058689  | 0.207615914 |
| 32.16399 | 47.37776 | 56.58956 | -0.35653 | 0.794232621 | 0.545985077 |
| 21.44266 | 7.431806 | 10.47955 | -0.32247 | 0.756663214 | NA          |
| 641.493  | 589.8996 | 538.6488 | 0.127977 | 0.658567464 | 0.602733581 |
| 201.9184 | 126.3407 | 202.2553 | -0.09343 | 0.499877044 | 0.834319281 |
| 374.3531 | 405.9624 | 462.1481 | -0.46019 | 0.468943258 | 0.00941523  |
| 1197.215 | 1086.902 | 1086.729 | 0.141118 | 0.096837782 | 0.435236327 |

|          |          |          |             |                |             |
|----------|----------|----------|-------------|----------------|-------------|
| 1698.438 | 1460.35  | 1449.322 | 0.249649    | 0.41286504     | 0.251743462 |
| 696.8865 | 656.7859 | 907.5289 | -0.3162     | 0.553198087    | 0.146815781 |
| 64.32799 | 68.74421 | 64.9732  | 0.377177    | 0.681216827    | 0.553844877 |
| 287.6891 | 322.3546 | 322.7701 | 0.020092    | 0.907472172    | 0.959341496 |
| 46.4591  | 63.17035 | 61.82934 | 0.113028    | 0.828379866    | 0.886786965 |
| 4720.959 | 4727.558 | 4321.766 | -0.00015    | 0.540391114    | 0.998959824 |
| 704.9275 | 643.7802 | 647.6361 | 0.320576    | 0.960956671    | 0.186593864 |
| 1027.461 | 930.8337 | 940.0155 | 0.335743    | 0.168465623    | 0.251817128 |
| 983.6821 | 1101.765 | 1013.372 | 0.018634    | 0.759261525    | 0.923910484 |
| 0        | 0        | 0        | #DIV/0! NA  | NA             |             |
| 36.63121 | 39.94596 | 29.34274 | -0.37341    | 0.989820945    | 0.539844242 |
| 351.1236 | 345.579  | 379.3597 | -0.08227    | 0.22648195     | 0.786706509 |
| 808.5671 | 847.2259 | 1037.475 | -0.66657    | 0.837292836    | 3.21175E-06 |
| 439.5746 | 409.6783 | 339.5374 | -0.1357     | 0.27470085     | 0.588371763 |
| 1.786889 | 2.786927 | 2.09591  | 0.34037 NA  | NA             |             |
| 1668.06  | 1572.756 | 1716.55  | 0.009471    | 0.43802737     | 0.9614279   |
| 1826.2   | 1776.202 | 1759.516 | 0.019885    | 0.485402441    | 0.922101817 |
| 2180.004 | 2312.221 | 1928.237 | -0.03331    | 0.004783907    | 0.889879926 |
| 3720.302 | 3846.889 | 3730.719 | 0.11019     | 0.28025041     | 0.305200742 |
| 8058.867 | 7771.811 | 8583.799 | -0.38661    | 0.71685777     | 0.001102729 |
| 796.9523 | 770.1209 | 682.2186 | 0.224097    | 0.941098554    | 0.374248122 |
| 5131.05  | 5101.006 | 4993.505 | -0.05579    | 0.901342739    | 0.796040638 |
| 1194.535 | 1291.276 | 1350.814 | -0.18128    | 0.254252351    | 0.324099572 |
| 554.8289 | 548.0957 | 562.7518 | -0.06765    | 0.549915616    | 0.786706509 |
| 607.5421 | 638.2063 | 591.0466 | -0.0854     | 0.530449366    | 0.703022228 |
| 3954.384 | 3982.519 | 4463.24  | -0.23312    | 0.836588992    | 0.110742141 |
| 1078.387 | 1151.001 | 1006.037 | 0.234361    | 0.495904925    | 0.342128545 |
| 1776.167 | 1513.302 | 1564.597 | 0.279378    | 0.458486853    | 0.320399987 |
| 10.72133 | 13.00566 | 14.67137 | -0.68663    | 0.901132408 NA |             |
| 2073.684 | 2128.283 | 2024.649 | 0.043045    | 0.199696516    | 0.81253834  |
| 2490.923 | 2668.947 | 2737.258 | -0.1328     | 0.886112674    | 0.315833346 |
| 18037.75 | 17834.48 | 19790.63 | -0.41043    | 0.794679259    | 0.001503374 |
| 230.5086 | 246.1786 | 253.6051 | -0.02145    | 0.274927458    | 0.931975702 |
| 1045.33  | 979.1405 | 892.8576 | 0.097933    | 0.79121035     | 0.687134752 |
| 5.360666 | 16.72156 | 24.10296 | -0.16544    | 0.817650331 NA |             |
| 1790.462 | 1531.881 | 1643.193 | 0.160437    | 0.034700814    | 0.37339403  |
| 1288.347 | 1230.893 | 1323.567 | -0.03125    | 0.185152106    | 0.889747395 |
| 879.1491 | 875.0952 | 935.8237 | 0.073408    | 0.164920979    | 0.791888862 |
| 662.9356 | 667.0046 | 536.5529 | 0.127835    | 0.985859213    | 0.611282744 |
| 1587.65  | 1656.364 | 1893.654 | 0.104469    | 0.034700814    | 0.682436785 |
| 368.099  | 404.1045 | 365.7363 | 0.142392    | 0.572336545    | 0.65282506  |
| 3345.949 | 2866.819 | 2790.704 | 0.397998    | 0.237605221    | 0.410595442 |
| 7.147554 | 4.644879 | 6.287729 | 0.757246    | 0.907551741 NA |             |
| 410.9844 | 471.9197 | 477.8674 | -0.01415    | 0.081828292    | 0.972140885 |
| 231.4021 | 239.6757 | 176.0564 | 0.062608    | 0.962011634    | 0.850669379 |
| 3324.506 | 3405.625 | 3431.004 | -0.09962    | 0.944173424    | 0.484163033 |
| 598.6077 | 476.5646 | 460.0522 | 0.116       | 0.884585407    | 0.658878607 |
| 256.4185 | 185.7952 | 203.3032 | 0.035004    | 0.37602059     | 0.92316895  |
| 0.893444 | 0.928976 | 6.287729 | 1.433123 NA | NA             |             |
| 578.0584 | 622.4138 | 511.402  | -0.03462    | 0.808425694    | 0.914553818 |
| 523.5583 | 424.5419 | 598.3822 | 0.137904    | 0.682715357    | 0.636454553 |
| 1.786889 | 0        | 4.19182  | 0.468662 NA | NA             |             |
| 182.2626 | 135.6305 | 207.4951 | -0.14856    | 0.29215357     | 0.739592868 |
| 67.00832 | 61.3124  | 50.30183 | -0.04364    | 0.935960933    | 0.971658868 |

|          |          |          |          |                |             |
|----------|----------|----------|----------|----------------|-------------|
| 1090.895 | 1011.655 | 1134.935 | -0.12838 | 0.240595478    | 0.595440724 |
| 1134.674 | 1265.265 | 1104.544 | 0.285201 | 0.33210787     | 0.260327022 |
| 83.98376 | 98.47143 | 84.88435 | -0.32867 | 0.826736401    | 0.47562949  |
| 2134.438 | 2263.914 | 1968.059 | 0.238912 | 0.265699092    | 0.168910143 |
| 1152.543 | 1155.646 | 1094.065 | 0.136299 | 0.835449534    | 0.463413871 |
| 661.1488 | 638.2063 | 640.3004 | 0.10732  | 0.542904501    | 0.656368654 |
| 1731.495 | 1923.909 | 1816.106 | -0.10115 | 0.967813477    | 0.589270302 |
| 1968.258 | 1927.625 | 1856.976 | 0.065772 | 0.301433669    | 0.672204533 |
| 1752.044 | 1958.281 | 1873.743 | -0.20595 | 0.243873626    | 0.221138056 |
| 542.3207 | 497.002  | 507.2102 | 0.11374  | 0.239965637    | 0.61283164  |
| 874.6819 | 915.9701 | 1018.612 | -0.44585 | 0.187415981    | 0.001258658 |
| 84.8772  | 61.3124  | 75.45275 | -0.50707 | 0.592673308    | 0.192843722 |
| 1179.346 | 1117.558 | 1294.224 | -0.31822 | 0.01192228     | 0.06712239  |
| 838.0507 | 797.0612 | 976.694  | -0.18169 | 0.010145368    | 0.431825344 |
| 116.1478 | 164.4287 | 165.5769 | -0.06843 | 0.007236622    | 0.879709806 |
| 2608.857 | 2474.791 | 2209.089 | 0.241416 | 0.226961756    | 0.285602122 |
| 645.0668 | 744.1096 | 838.3639 | -0.38885 | 0.786445338    | 0.029788115 |
| 3376.326 | 3543.114 | 3684.609 | -0.13607 | 0.324105472    | 0.339645561 |
| 1123.059 | 1011.655 | 1051.099 | 0.042211 | 0.114505424    | 0.835596295 |
| 23.22955 | 20.43747 | 26.19887 | 0.37428  | 0.542904501 NA |             |
| 680.8045 | 656.7859 | 642.3963 | 0.0757   | 0.956452433    | 0.730853476 |
| 543.2141 | 600.1183 | 667.5473 | -0.32215 | 0.883354954    | 0.049190168 |
| 442.2549 | 409.6783 | 550.1763 | 0.000491 | 0.408718189    | 0.999397196 |
| 355.5908 | 366.0165 | 313.3385 | 0.117406 | 0.610241564    | 0.677324798 |
| 970.2805 | 991.2171 | 955.7349 | 0.172514 | 0.896802518    | 0.372335894 |
| 18.76233 | 12.07668 | 6.287729 | 0.323708 | 0.827572328 NA |             |
| 792.4851 | 763.6181 | 773.3907 | -0.14937 | 0.388777613    | 0.512079093 |
| 267.1398 | 213.6644 | 247.3174 | 0.020436 | 0.666493976    | 0.975879427 |
| 1553.7   | 1573.685 | 1516.391 | -0.12555 | 0.975298616    | 0.291835413 |
| 16.082   | 13.00566 | 17.81523 | 0.256867 | 0.967813477 NA |             |
| 1.786889 | 0        | 12.57546 | -1.7644  | 0.990064993 NA |             |
| 319.853  | 310.2779 | 362.5924 | -0.07749 | 0.982390822    | 0.833611802 |
| 1198.109 | 1111.055 | 1131.791 | 0.182736 | 0.791689312    | 0.198030129 |
| 1350.888 | 1550.461 | 1303.656 | 0.077241 | 0.34687574     | 0.723437511 |
| 6445.307 | 6329.112 | 6842.098 | -0.06822 | 0.0779973      | 0.583691606 |
| 3.573777 | 3.715903 | 3.143865 | -0.48944 | 0.826883467 NA |             |
| 2765.21  | 2847.311 | 2591.592 | -0.0583  | 0.755826522    | 0.774121067 |
| 1219.551 | 1293.134 | 1322.519 | 0.376369 | 0.642246351    | 0.008625676 |
| 345046.4 | 339485.8 | 323258.5 | -0.25475 | 0.904254847    | 0.049333376 |
| 285.9022 | 287.0535 | 257.7969 | 0.195136 | 0.399288509    | 0.614824771 |
| 386.8614 | 449.6243 | 378.3117 | 0.058274 | 0.812875146    | 0.858146459 |
| 788.0178 | 883.4559 | 813.213  | 0.184746 | 0.028201152    | 0.302912952 |
| 555.7223 | 544.3798 | 552.2722 | 0.056756 | 0.998609328    | 0.835596295 |
| 865.7475 | 896.4616 | 911.7208 | -0.19723 | 0.002987139    | 0.239315229 |
| 598.6077 | 615.9109 | 511.402  | 0.18945  | 0.072027046    | 0.395164375 |
| 441.3615 | 377.1642 | 248.3653 | 0.069797 | 0.469347309    | 0.856460907 |
| 45517.41 | 43678.58 | 41578.66 | -0.05744 | 0.212716004    | 0.672730781 |
| 1791.356 | 2032.599 | 2229     | 0.809213 | 0.617661583    | 7.09339E-10 |
| 1450.06  | 1308.927 | 1465.041 | -0.10662 | 0.723128445    | 0.495076977 |
| 220.6807 | 191.369  | 215.8787 | -0.12056 | 0.503345543    | 0.745567347 |
| 4029.434 | 3986.235 | 4132.086 | 0.217097 | 0.695594764    | 0.011539863 |
| 734.4112 | 881.598  | 623.5332 | 0.223593 | 0.553198087    | 0.374236525 |
| 1122.166 | 1220.674 | 974.5981 | 0.236538 | 0.179746977    | 0.327516537 |
| 6388.126 | 6503.759 | 6464.834 | -0.16507 | 0.44116367     | 0.064858857 |

|          |          |          |          |             |             |
|----------|----------|----------|----------|-------------|-------------|
| 621.8372 | 689.3    | 712.6093 | -0.02035 | 0.269120346 | 0.929220289 |
| 352.017  | 354.8687 | 407.6545 | -0.31766 | 0.08410248  | 0.10698808  |
| 8.934443 | 8.360782 | 9.431594 | -0.21313 | 0.871801928 | NA          |
| 3535.359 | 3725.193 | 3516.937 | -0.09301 | 0.001223265 | 0.65282506  |
| 576.2715 | 516.5105 | 455.8604 | 0.085975 | 0.38025264  | 0.797601985 |
| 76.83621 | 75.24704 | 88.02821 | 0.322646 | 0.960823113 | 0.572969021 |
| 520.878  | 520.2264 | 528.1693 | -0.04858 | 0.54674796  | 0.841070222 |
| 2120.143 | 1975.002 | 1847.544 | 0.10269  | 0.948896953 | 0.521095388 |
| 2723.218 | 2580.695 | 2618.839 | 0.01972  | 0.769710962 | 0.915543523 |
| 0        | 1.857952 | 6.287729 | -0.37122 | 0.837998472 | NA          |
| 12.50822 | 12.07668 | 27.24683 | 1.897833 | 0.986203512 | NA          |
| 26.80333 | 13.00566 | 6.287729 | 0.297055 | 0.354108154 | NA          |
| 437.7877 | 366.9454 | 422.3258 | -0.21824 | 0.6333028   | 0.361214706 |
| 4342.139 | 4067.985 | 4107.983 | 0.262503 | 0.07224611  | 0.067080808 |
| 192.0905 | 229.457  | 170.8166 | 0.001841 | 0.827268091 | 0.990142758 |
| 1276.732 | 1208.597 | 1166.374 | 0.354181 | 0.728952588 | 0.137586476 |
| 2169.283 | 1988.937 | 2090.67  | 0.079814 | 0.607918252 | 0.589603442 |
| 10.72133 | 7.431806 | 8.383639 | -0.49962 | 0.831317845 | NA          |
| 104.533  | 88.2527  | 75.45275 | 0.961239 | 0.842806932 | 0.12712136  |
| 2124.61  | 2039.102 | 2133.636 | 0.180081 | 0.220715145 | 0.190817982 |
| 2190.725 | 2174.732 | 2101.15  | -0.0673  | 0.506564301 | 0.680780346 |
| 1.786889 | 0.928976 | 3.143865 | -1.46042 | 0.694447279 | NA          |
| 841.6245 | 753.3993 | 739.8562 | 0.20802  | 0.173204878 | 0.394044776 |
| 5.360666 | 6.50283  | 3.143865 | -0.08921 | 0.774045793 | NA          |
| 8.040998 | 3.715903 | 6.287729 | 0.912204 | NA          | NA          |
| 29.48366 | 33.44313 | 28.29478 | 0.3795   | 0.8968711   | NA          |
| 506.5829 | 442.1925 | 518.7377 | -0.23788 | 0.007739408 | 0.22043651  |
| 686.1652 | 716.2403 | 698.9859 | 0.036603 | 0.828016939 | 0.884087376 |
| 4958.616 | 4841.822 | 4686.454 | 0.143203 | 0.86365129  | 0.189401758 |
| 19.65577 | 70.60216 | 58.68547 | -0.40887 | 0.965666941 | 0.540191544 |
| 50.92632 | 56.66752 | 54.49365 | 0.232814 | 0.283463824 | 0.800895715 |
| 5.360666 | 8.360782 | 2.09591  | -0.91503 | 0.962556121 | NA          |
| 20.54922 | 12.07668 | 27.24683 | -0.04577 | 0.471685453 | NA          |
| 160.82   | 184.8662 | 132.0423 | -0.35698 | 0.730800205 | 0.380365797 |
| 5.360666 | 7.431806 | 0        | 0.958038 | NA          | NA          |
| 1416.109 | 1425.978 | 1194.669 | 0.116357 | 0.392128795 | 0.568229673 |
| 843.4114 | 875.0952 | 849.8914 | 0.082448 | 0.684723286 | 0.690294956 |
| 1.786889 | 0.928976 | 1.047955 | -0.48506 | NA          | NA          |
| 889.8705 | 874.1662 | 974.5981 | -0.21385 | 0.208221128 | 0.186548284 |
| 201.9184 | 164.4287 | 185.488  | -0.04885 | 0.875720952 | 0.891559992 |
| 5390.149 | 5051.77  | 4488.391 | -0.10814 | 5.99679E-07 | 0.644740483 |
| 31.27055 | 20.43747 | 28.29478 | -0.27328 | 0.393551305 | NA          |
| 3330.76  | 3204.037 | 2915.411 | 0.272687 | 0.125442514 | 0.280613898 |
| 33.95088 | 31.58518 | 19.91114 | -0.91075 | 0.183923135 | 0.097257448 |
| 1388.412 | 1293.134 | 1435.698 | 0.033464 | 0.520751048 | 0.855100406 |
| 585.206  | 610.3371 | 671.7391 | -0.27613 | 0.381821718 | 0.073548481 |
| 594.1404 | 491.4282 | 681.1707 | -0.11024 | 0.947527175 | 0.754561878 |
| 686.1652 | 622.4138 | 606.7659 | 0.040722 | 0.352157146 | 0.886786965 |
| 1176.666 | 1147.285 | 994.5092 | -0.04295 | 0.962433805 | 0.87466351  |
| 335.935  | 404.1045 | 359.4485 | -0.24744 | 0.285144055 | 0.247307157 |
| 431.5336 | 364.1585 | 418.134  | -0.15978 | 0.362090257 | 0.517933072 |
| 966.7067 | 930.8337 | 1031.188 | -0.06204 | 0.001914596 | 0.744172227 |
| 1542.978 | 1542.1   | 1424.171 | 0.185511 | 0.586957479 | 0.333065318 |
| 33221.83 | 33453.35 | 33559.71 | -0.56541 | 0.585115533 | 2.31559E-10 |

|          |          |          |             |                |             |
|----------|----------|----------|-------------|----------------|-------------|
| 3279.834 | 3214.256 | 3042.213 | -0.05849    | 0.711956678    | 0.684131921 |
| 33.05744 | 15.79259 | 37.72638 | -0.05656    | 0.918350023    | 0.93327699  |
| 1384.839 | 1324.719 | 1288.985 | 0.046749    | 0.707368241    | 0.859505388 |
| 547.6813 | 607.5501 | 592.0945 | 0.135092    | 0.936346196    | 0.511081603 |
| 386.8614 | 354.8687 | 325.914  | 0.201873    | 0.826098854    | 0.443275405 |
| 619.1569 | 620.5558 | 685.3625 | -0.01075    | 0.690391809    | 0.957969787 |
| 1295.494 | 1298.708 | 1309.944 | -0.05135    | 0.403965481    | 0.797601985 |
| 1.786889 | 0        | 6.287729 | #DIV/0! NA  | NA             |             |
| 25.01644 | 12.07668 | 18.86319 | 0.581027    | 0.875830579 NA |             |
| 3299.49  | 3380.543 | 3694.041 | 0.191139    | 0.260444304    | 0.173745879 |
| 15.18855 | 13.00566 | 19.91114 | -0.70661    | 0.962011634 NA |             |
| 3078.809 | 3118.572 | 3877.433 | -0.69588    | 0.025214551    | 4.83481E-06 |
| 972.0674 | 1010.726 | 1068.914 | 0.062444    | 0.617789656    | 0.80286002  |
| 3759.613 | 3852.462 | 5105.636 | -0.59292    | 0.969447004    | 0.000264275 |
| 4930.919 | 5452.159 | 5590.839 | -0.24105    | 0.847517975    | 0.100672129 |
| 2532.021 | 2677.308 | 2384.097 | 0.261518    | 0.54674796     | 0.055185829 |
| 422.5991 | 317.7097 | 281.8999 | -0.06278    | 0.252640265    | 0.878767667 |
| 1399.134 | 1452.918 | 1461.897 | 0.077358    | 0.892240442    | 0.658276069 |
| 58.07388 | 22.29542 | 37.72638 | 0.34401     | 0.827268091 NA |             |
| 1324.084 | 1325.648 | 1125.504 | 0.118208    | 0.493325129    | 0.579998211 |
| 253.7382 | 235.0309 | 285.0437 | -0.34419    | 0.784378477    | 0.10424789  |
| 1017.633 | 873.2372 | 889.7137 | 0.241285    | 0.988569159    | 0.164747869 |
| 1051.584 | 1033.021 | 1207.244 | -0.16777    | 0.792868376    | 0.364490432 |
| 235.8693 | 171.8605 | 141.4739 | -0.22871    | 0.919799198    | 0.553799324 |
| 1064.092 | 1018.157 | 870.8505 | 0.032207    | 0.485973657    | 0.912173468 |
| 1090.895 | 994.933  | 947.3512 | 0.180565    | 0.573411006    | 0.451963117 |
| 0.893444 | 0        | 2.09591  | 1.182577 NA | NA             |             |
| 1688.61  | 1727.895 | 1693.495 | -0.30712    | 0.804201321    | 0.039022257 |
| 6431.012 | 6310.532 | 6401.956 | 0.163478    | 0.154093864    | 0.159141538 |
| 7.147554 | 3.715903 | 0        | 1.211875 NA | NA             |             |
| 2104.955 | 2278.778 | 2073.903 | -0.06042    | 0.94035236     | 0.794119423 |
| 1376.798 | 1426.907 | 1199.908 | 0.199855    | 0.683079974    | 0.275261425 |
| 3946.343 | 3923.065 | 3500.169 | 0.107465    | 0.00758806     | 0.659338327 |
| 2919.776 | 2897.475 | 3046.405 | -0.34845    | 0.904254847    | 0.003399865 |
| 3183.342 | 3065.62  | 2936.37  | 0.159382    | 0.727266789    | 0.149596369 |
| 308.2383 | 324.2125 | 427.5656 | -0.02842    | 0.817060109    | 0.935768815 |
| 4010.671 | 3989.022 | 3186.831 | 0.251049    | 0.270624697    | 0.566028914 |
| 1071.24  | 1189.089 | 1330.903 | -0.24398    | 0.600008341    | 0.258978375 |
| 14127.14 | 13938.35 | 14911.35 | 0.132413    | 0.897766774    | 0.341785585 |
| 826.4359 | 715.3113 | 577.4231 | 0.231279    | 0.324651337    | 0.465059088 |
| 773.7227 | 701.3767 | 686.4105 | 0.076529    | 0.133378715    | 0.762106199 |
| 69.68865 | 44.59084 | 83.83639 | -0.30896    | 0.226105917    | 0.570089152 |
| 2303.299 | 2485.939 | 2517.188 | -0.14493    | 0.9951976      | 0.33997316  |
| 1323.191 | 1252.259 | 1321.471 | 0.094844    | 0.840763345    | 0.637407167 |
| 5350.838 | 5247.784 | 6302.401 | -0.28967    | 0.875368742    | 0.073064303 |
| 1730.602 | 1571.827 | 1583.46  | 0.082427    | 0.072027046    | 0.681523937 |
| 1354.461 | 1369.31  | 1425.219 | 0.020021    | 0.6212524      | 0.919916667 |
| 504.796  | 534.1611 | 638.2045 | -0.17102    | 0.12376446     | 0.505302546 |
| 102.7461 | 126.3407 | 167.6728 | 0.096618    | 0.377049586    | 0.836257824 |
| 97.38542 | 107.7612 | 90.12412 | 0.188636    | 0.472470204    | 0.683195977 |
| 181.3692 | 145.8492 | 161.3851 | -0.36513    | 0.843125549    | 0.210525115 |
| 1237.42  | 1159.362 | 1217.724 | 0.16964     | 0.833499639    | 0.278100425 |
| 31592.19 | 30848.5  | 33662.41 | -0.59234    | 0.864963799    | 4.66632E-07 |
| 5791.306 | 5543.198 | 5914.657 | 0.07888     | 0.894528942    | 0.55402404  |

|          |          |          |          |             |             |
|----------|----------|----------|----------|-------------|-------------|
| 223.3611 | 236.8888 | 200.1594 | 0.269218 | 0.622518586 | 0.333325701 |
| 947.0509 | 1020.944 | 828.9323 | 0.080822 | 0.990735591 | 0.818719704 |
| 741.5587 | 741.3227 | 724.1368 | 0.115227 | 0.923281561 | 0.55088846  |
| 619.1569 | 510.9367 | 617.2454 | 0.135977 | 0.730407446 | 0.642738974 |
| 675.4439 | 746.8965 | 836.268  | -0.05774 | 0.818107632 | 0.822780332 |
| 0.893444 | 3.715903 | 8.383639 | 1.470124 | 0.727337313 | NA          |
| 1011.379 | 888.1008 | 1084.633 | -0.01574 | 0.484865818 | 0.942357977 |
| 1746.684 | 1758.551 | 1716.55  | 0.217603 | 0.308044443 | 0.348829966 |
| 720.1161 | 617.7689 | 617.2454 | 0.439168 | 0.852231703 | 0.001782533 |
| 359.1646 | 401.3175 | 436.9972 | -0.18903 | 0.986203512 | 0.425905313 |
| 591.4601 | 557.3855 | 598.3822 | 0.052102 | 0.843125549 | 0.823761853 |
| 653.1078 | 666.0756 | 776.5346 | -0.01955 | 0.535057938 | 0.955311096 |
| 2002.209 | 2094.84  | 2330.652 | -0.00878 | 0.921413319 | 0.9717805   |
| 1.786889 | 0        | 0        | -1.74916 | NA          | NA          |
| 612.9028 | 616.8399 | 644.4923 | 0.087109 | 0.948896953 | 0.708596546 |
| 677.2307 | 750.6124 | 778.6305 | 0.157935 | 0.898182122 | 0.365235491 |
| 23.22955 | 24.15337 | 22.00705 | 0.713909 | 0.935506037 | NA          |
| 181.3692 | 127.2697 | 145.6657 | -0.2162  | 0.537749415 | 0.582933252 |
| 818.3949 | 881.598  | 945.2553 | 0.147296 | 0.521899793 | 0.462978863 |
| 13421.32 | 13652.23 | 13762.79 | -0.2833  | 0.730204074 | 0.043279608 |
| 1002.444 | 947.5553 | 1119.216 | 0.102256 | 0.226105917 | 0.67856997  |
| 700.4603 | 692.0869 | 732.5205 | -0.1163  | 0.935506037 | 0.534883449 |
| 422.5991 | 469.1328 | 495.6827 | 0.065108 | 0.429368942 | 0.831655346 |
| 4398.426 | 4177.604 | 4520.877 | -0.11288 | 0.904521596 | 0.517983853 |
| 14.29511 | 2.786927 | 2.09591  | 1.388777 | NA          | NA          |
| 2582.054 | 2699.604 | 2426.016 | -0.06085 | 0.848509848 | 0.764996976 |
| 641.493  | 583.3968 | 484.1552 | 0.116814 | 0.648624949 | 0.686855559 |
| 1014.953 | 1175.154 | 1341.382 | -0.04034 | 0.354108154 | 0.887908388 |
| 514.6239 | 516.5105 | 506.1622 | -0.14568 | 0.652183366 | 0.489096476 |
| 2287.217 | 2373.533 | 2549.674 | 0.098057 | 0.827268091 | 0.532286968 |
| 187.6233 | 205.3036 | 172.9126 | -0.34889 | 0.000120934 | 0.307273072 |
| 199.2381 | 155.139  | 249.4133 | -0.23988 | 0.090626117 | 0.490908806 |
| 62.5411  | 37.15903 | 77.54866 | 0.678377 | 0.916416444 | 0.201158042 |
| 560.1895 | 545.3088 | 615.1495 | 0.074102 | 0.678440947 | 0.768125604 |
| 1441.126 | 1521.662 | 1462.945 | 0.041825 | 0.493325129 | 0.79934904  |
| 1291.027 | 1335.867 | 1496.48  | -0.26881 | 0.486409231 | 0.064858857 |
| 1873.553 | 1736.256 | 1758.468 | 0.259357 | 0.707092679 | 0.294886007 |
| 7115.39  | 7201.42  | 9050.138 | -0.18801 | 0.976681492 | 0.370905349 |
| 0        | 2.786927 | 0        | 0.081418 | NA          | NA          |
| 727.2636 | 793.3453 | 766.055  | 0.102075 | 0.962433805 | 0.6924902   |
| 118.8281 | 130.0566 | 119.4669 | -0.21564 | 0.107676441 | 0.566742383 |
| 990.8297 | 885.3139 | 855.1312 | 0.158856 | 0.214675875 | 0.569403364 |
| 4328.737 | 4447.936 | 4788.106 | -0.04224 | 0.650244439 | 0.840777068 |
| 1.786889 | 9.289758 | 12.57546 | -0.41393 | 0.916361438 | NA          |
| 458.3369 | 465.4169 | 409.7504 | 0.236698 | 0.072365168 | 0.283703282 |
| 840.731  | 980.9984 | 720.993  | 0.036397 | 0.707919104 | 0.908612163 |
| 369.8859 | 358.5846 | 341.6333 | 0.039028 | 0.112254368 | 0.884584155 |
| 75.04932 | 75.24704 | 96.41185 | -0.59594 | 0.91014027  | 0.088358317 |
| 251.0578 | 224.8121 | 268.2765 | -0.44198 | 0.769710962 | 0.201829761 |
| 778.1899 | 715.3113 | 710.5134 | 0.100672 | 0.274927458 | 0.640053604 |
| 234.9758 | 257.3263 | 303.9069 | 0.103813 | 0.210289554 | 0.787901563 |
| 587.8863 | 633.5615 | 649.732  | -0.18123 | 0.033611173 | 0.314044192 |
| 12.50822 | 18.57952 | 8.383639 | -0.56472 | 0.61217167  | NA          |
| 3598.793 | 3384.259 | 3425.765 | 0.205336 | 0.811082292 | 0.117115343 |

|          |          |          |            |                |             |
|----------|----------|----------|------------|----------------|-------------|
| 310.0252 | 336.2892 | 345.8251 | -0.22054   | 0.337335124    | 0.402824474 |
| 252.8447 | 236.8888 | 219.0226 | -0.14069   | 0.759261525    | 0.677324798 |
| 1.786889 | 1.857952 | 2.09591  | #DIV/0! NA | NA             |             |
| 0        | 0        | 0        | #NUM! NA   | NA             |             |
| 3333.441 | 3271.853 | 3154.344 | 0.014862   | 0.212716004    | 0.936794868 |
| 2130.865 | 2027.025 | 1882.127 | 0.052822   | 0.44342611     | 0.832900164 |
| 60.75421 | 90.11065 | 82.78844 | -0.37659   | 0.783760899    | 0.463947642 |
| 314.4924 | 248.0365 | 351.0649 | 0.283328   | 0.241933407    | 0.372335894 |
| 2435.529 | 2495.229 | 2554.914 | -0.10695   | 0.995861369    | 0.487331989 |
| 1180.24  | 1135.208 | 1121.312 | 0.074426   | 0.451912698    | 0.728253469 |
| 3003.76  | 2799.933 | 3010.774 | -0.40631   | 0.411467295    | 0.001219868 |
| 41.09844 | 20.43747 | 54.49365 | -0.5625    | 0.904254847 NA |             |
| 558.4027 | 516.5105 | 526.0734 | -0.15123   | 0.779325825    | 0.490958801 |
| 1754.725 | 1632.21  | 1925.093 | -0.0748    | 0.582750031    | 0.752838067 |
| 1641.257 | 1623.85  | 2026.745 | 0.117199   | 0.865150494    | 0.690294956 |
| 1815.479 | 1991.724 | 1754.276 | 0.371943   | 0.280466121    | 0.028065868 |
| 368.099  | 311.2069 | 287.1396 | -0.10009   | 0.048326024    | 0.757633181 |
| 504.796  | 586.1837 | 569.0395 | -0.0454    | 0.861070915    | 0.873196229 |
| 247.4841 | 252.6814 | 193.8717 | 0.324056   | 0.072773765    | 0.27042216  |
| 2163.922 | 2266.701 | 2476.317 | 0.082905   | 0.907095813    | 0.647040539 |
| 1360.716 | 1331.222 | 1477.616 | -0.08146   | 0.04129094     | 0.583691606 |
| 1278.519 | 1484.503 | 1498.575 | -0.34981   | 0.617661583    | 0.041646854 |
| 1945.922 | 1875.602 | 2020.457 | -0.17826   | 0.579526371    | 0.167949464 |
| 559.2961 | 583.3968 | 570.0875 | -0.39165   | 0.286938782    | 0.079283616 |
| 1468.822 | 1517.946 | 1374.917 | 0.106225   | 0.482562486    | 0.542805648 |
| 0        | 0        | 0        | #DIV/0! NA | NA             |             |
| 1346.42  | 1239.254 | 1304.704 | -0.09428   | 0.864963799    | 0.595423496 |
| 234.9758 | 264.7581 | 211.6869 | -0.25485   | 0.005955217    | 0.403397484 |
| 421.7057 | 422.684  | 394.031  | 0.452269   | 0.757279972    | 0.091639488 |
| 524.4518 | 485.8543 | 517.6897 | -0.14034   | 0.860650755    | 0.55088846  |
| 671.8701 | 676.2944 | 689.5543 | 0.203671   | 0.434274199    | 0.409178926 |
| 375.2466 | 380.8801 | 358.4006 | 0.058969   | 0.60948547     | 0.880061352 |
| 8.934443 | 5.573855 | 6.287729 | -0.56536   | 0.345374681 NA |             |
| 362.7384 | 387.3829 | 400.3188 | 0.193164   | 0.905579464    | 0.422793542 |
| 488.714  | 377.1642 | 441.189  | 0.069866   | 0.58195463     | 0.833848825 |
| 1056.051 | 1085.044 | 949.4471 | 0.261918   | 0.323780681    | 0.098609359 |
| 696.8865 | 599.1894 | 688.5064 | 0.144878   | 0.869592661    | 0.561367299 |
| 323.4268 | 404.1045 | 298.6671 | 0.203262   | 0.94035236     | 0.565559013 |
| 2136.225 | 2000.085 | 1909.374 | 0.275267   | 0.136068446    | 0.250258579 |
| 15399.41 | 16334.18 | 17299.64 | -0.34034   | 0.817060109    | 0.005166188 |
| 469.0582 | 564.8173 | 463.1961 | 0.369166   | 0.985859213    | 0.046018016 |
| 959.5591 | 941.0524 | 913.8167 | 0.312896   | 0.632040487    | 0.081022399 |
| 209.066  | 215.5224 | 155.0973 | 0.01764    | 0.27747938     | 0.960357548 |
| 4421.656 | 4447.007 | 5063.718 | -0.26025   | 0.711342547    | 0.083564912 |
| 746.026  | 827.7174 | 758.7193 | -0.21639   | 0.649714874    | 0.314015775 |
| 7143.98  | 6454.524 | 6103.289 | 0.199294   | 0.171568235    | 0.280613898 |
| 2658.89  | 2376.32  | 2318.076 | 0.19192    | 0.237605221    | 0.700583782 |
| 5.360666 | 10.21873 | 4.19182  | -0.75675   | 0.83213076 NA  |             |
| 943.4771 | 957.774  | 1195.717 | -0.19453   | 0.785492922    | 0.515285838 |
| 173.3282 | 182.0792 | 211.6869 | 0.280542   | 0.785492922    | 0.557230622 |
| 1318.724 | 1351.66  | 1255.45  | 0.102387   | 0.856244695    | 0.480320232 |
| 8841.524 | 8497.341 | 8452.804 | -0.02453   | 0.856763291    | 0.86814025  |
| 1518.855 | 1516.088 | 1297.368 | 0.0343     | 0.233444561    | 0.896421455 |
| 4.467221 | 0        | 2.09591  | #DIV/0! NA | NA             |             |



|          |          |          |          |             |             |
|----------|----------|----------|----------|-------------|-------------|
| 122.4019 | 112.4061 | 121.5628 | 0.121526 | 0.183509443 | 0.797601985 |
| 1758.298 | 1753.906 | 1616.994 | 0.338193 | 0.811220717 | 0.007195336 |
| 236.7627 | 194.1559 | 206.4471 | 0.041899 | 0.952783825 | 0.912024085 |
| 16.97544 | 12.07668 | 23.05501 | 0.228548 | 0.716351188 | NA          |
| 0        | 0        | 1.047955 | -0.68638 | NA          | NA          |
| 1055.158 | 924.3309 | 954.6869 | 0.13613  | 0.206702304 | 0.658318551 |
| 966.7067 | 823.0725 | 906.481  | 0.010009 | 0.479830743 | 0.973662475 |
| 2186.258 | 2159.869 | 2517.188 | 0.008919 | 0.988569159 | 0.975879427 |
| 543.2141 | 551.8116 | 491.4908 | -0.04694 | 0.847071887 | 0.889879926 |
| 5744.847 | 5423.36  | 5084.677 | 0.100751 | 0.352115003 | 0.666217785 |
| 407.4106 | 317.7097 | 345.8251 | -0.15606 | 0.274301907 | 0.575540189 |
| 19.65577 | 33.44313 | 40.87024 | -0.19101 | 0.848694292 | NA          |
| 343.0826 | 341.8631 | 274.5642 | 0.067871 | 0.597707702 | 0.865063191 |
| 147.4183 | 139.3464 | 164.5289 | 0.447926 | 0.84488548  | 0.208318412 |
| 1303.535 | 1278.271 | 1438.842 | -0.22413 | 0.58195463  | 0.194891359 |
| 776.4031 | 716.2403 | 948.3992 | 0.403213 | 0.690604569 | 0.028545761 |
| 545.8944 | 524.8713 | 548.0804 | -0.10712 | 0.004522157 | 0.589413891 |
| 2445.357 | 2415.337 | 2167.171 | 0.096992 | 0.81803103  | 0.579811887 |
| 251.9513 | 218.3093 | 290.2835 | -0.11242 | 0.049410877 | 0.746009092 |
| 1562.634 | 1583.904 | 1258.594 | 0.238332 | 0.391682273 | 0.309248984 |
| 757.6407 | 690.229  | 800.6375 | -0.09922 | 0.80037736  | 0.685414212 |
| 945.264  | 954.9871 | 1229.251 | 0.062588 | 0.04935905  | 0.821432697 |
| 58.96732 | 56.66752 | 76.50071 | -0.48284 | 0.592978918 | 0.223810637 |
| 548.5748 | 463.5589 | 383.5515 | 0.048345 | 0.251419778 | 0.908612163 |
| 67.00832 | 91.9686  | 101.6516 | 0.45793  | 0.365690431 | 0.283438968 |
| 2130.865 | 2127.354 | 2441.735 | 0.065643 | 0.835449534 | 0.740018919 |
| 0        | 0        | 0        | #DIV/0!  | NA          | NA          |
| 319.853  | 342.7921 | 343.7292 | 0.173482 | 0.92288341  | 0.495986013 |
| 694.2062 | 759.9022 | 653.9239 | -0.19526 | 0.652050398 | 0.365235491 |
| 4859.443 | 4643.95  | 5586.648 | -0.10822 | 0.739965249 | 0.575067875 |
| 989.9362 | 1006.081 | 1091.969 | -0.12982 | 0.861070915 | 0.462496385 |
| 152.779  | 124.4828 | 111.0832 | 0.241318 | 0.577332911 | 0.516190108 |
| 25572.16 | 24808.3  | 25350.03 | -0.36827 | 0.832298202 | 0.00280023  |
| 1165.051 | 1169.58  | 1141.223 | 0.169663 | 0.383871116 | 0.281445446 |
| 1115.912 | 1227.177 | 1151.702 | -0.13521 | 0.072296871 | 0.422793542 |
| 1836.921 | 1805.929 | 1701.879 | -0.18833 | 0.770051929 | 0.161220563 |
| 1028.354 | 1098.978 | 928.488  | 0.154225 | 0.320915881 | 0.359873864 |
| 1452.74  | 1564.395 | 1781.523 | 0.116437 | 0.794679259 | 0.558104763 |
| 13691.14 | 13650.37 | 14468.07 | -0.42244 | 0.728952588 | 0.005161963 |
| 591.4601 | 548.0957 | 509.3061 | 0.450136 | 0.136068446 | 0.092469287 |
| 450.2959 | 452.4112 | 429.6615 | 0.310824 | 0.93984524  | 0.081121312 |
| 1104.297 | 997.72   | 1016.516 | 0.325788 | 0.906368111 | 0.044242334 |
| 460.1238 | 431.0448 | 444.3329 | -0.05419 | 0.510046913 | 0.840548247 |
| 1263.33  | 1353.518 | 1174.757 | 0.190902 | 0.484625827 | 0.398655382 |
| 45.56566 | 16.72156 | 36.67842 | -0.13046 | 0.572336545 | NA          |
| 176.902  | 131.9146 | 142.5219 | 0.120032 | 0.410903637 | 0.806564543 |
| 0        | 0        | 0        | #NUM!    | NA          | NA          |
| 2115.676 | 1874.673 | 1734.365 | 0.054899 | 0.637091947 | 0.819964665 |
| 0        | 0        | 1.047955 | #DIV/0!  | NA          | NA          |
| 0        | 2.786927 | 3.143865 | #DIV/0!  | NA          | NA          |
| 1065.879 | 1252.259 | 985.0776 | -0.05987 | 0.17246068  | 0.817988115 |
| 670.9766 | 646.5671 | 522.9295 | 0.276005 | 0.57058689  | 0.380264685 |
| 5187.337 | 5197.619 | 5526.914 | -0.05316 | 0.527593235 | 0.755157732 |
| 766.5752 | 828.6464 | 636.1086 | 0.375097 | 0.78618046  | 0.065248652 |

|          |          |          |          |             |             |
|----------|----------|----------|----------|-------------|-------------|
| 280.5415 | 201.5877 | 234.7419 | 0.100975 | 0.856763291 | 0.798013277 |
| 322.5334 | 354.8687 | 359.4485 | -0.08566 | 0.01003883  | 0.756795912 |
| 3113.653 | 3213.327 | 3199.406 | -0.14598 | 0.498379067 | 0.385637803 |
| 4200.975 | 4326.24  | 4009.475 | 0.020937 | 0.064220724 | 0.908612163 |
| 28.59022 | 19.50849 | 16.76728 | -0.65241 | 0.354108154 | NA          |
| 1174.879 | 1102.694 | 1096.161 | 0.129269 | 0.497263297 | 0.50924517  |
| 654.8946 | 597.3314 | 624.5811 | 0.263565 | 0.572219847 | 0.098488434 |
| 387.7548 | 400.3886 | 319.6262 | 0.185702 | 0.883354954 | 0.598691725 |
| 1368.757 | 1378.6   | 1439.89  | 0.286883 | 0.05643267  | 0.009798351 |
| 1431.298 | 1451.989 | 1415.787 | 0.000398 | 0.331331472 | 0.999397196 |
| 1003.338 | 965.2058 | 887.6178 | 0.195704 | 0.740595411 | 0.303824089 |
| 611.1159 | 645.6382 | 575.3272 | -0.03375 | 0.0779973   | 0.897989514 |
| 963.1329 | 1018.157 | 868.7546 | 0.200008 | 0.285144055 | 0.409178926 |
| 1074.813 | 1243.899 | 1026.996 | 0.219528 | 0.663047044 | 0.36518668  |
| 477.9927 | 453.3402 | 403.4626 | -0.14994 | 0.955592311 | 0.550627492 |
| 939.0099 | 926.1888 | 1040.619 | -0.41981 | 0.770051929 | 0.001123727 |
| 132.2298 | 156.9969 | 161.3851 | -0.50677 | 0.205414362 | 0.073548481 |
| 1068.559 | 1042.311 | 1096.161 | 0.012587 | 0.6333028   | 0.952666818 |
| 1008.699 | 1064.606 | 1096.161 | -0.00815 | 0.849390636 | 0.984451848 |
| 26.80333 | 32.51415 | 19.91114 | -0.11195 | 0.968645699 | NA          |
| 670.9766 | 672.5785 | 790.158  | -0.24678 | 0.871801928 | 0.200030838 |
| 0        | 0.928976 | 1.047955 | 0.586005 | NA          | NA          |
| 0.893444 | 1.857952 | 1.047955 | -1.85036 | NA          | NA          |
| 2450.718 | 2280.635 | 2750.882 | -0.24632 | 0.465940241 | 0.118990473 |
| 0        | 0        | 0        | #DIV/0!  | NA          | NA          |
| 364.5253 | 387.3829 | 386.6954 | 0.096205 | 0.716351188 | 0.73912962  |
| 801.4195 | 758.0442 | 903.3371 | -0.20759 | 0.693771149 | 0.386225298 |
| 0        | 0        | 1.047955 | -0.32968 | NA          | NA          |
| 401.1565 | 382.738  | 384.5994 | 0.752717 | 0.759261525 | 0.00133704  |
| 3.573777 | 0.928976 | 4.19182  | -0.82348 | NA          | NA          |
| 824.6491 | 822.1435 | 810.0691 | 0.101236 | 0.601878463 | 0.663320474 |
| 981.0018 | 894.6037 | 943.1594 | -0.07151 | 0.29215357  | 0.722021255 |
| 0        | 0        | 0        | #NUM!    | NA          | NA          |
| 2241.652 | 2210.033 | 2515.092 | 1.197319 | 0.371493568 | 1.85992E-19 |
| 39.31155 | 37.15903 | 42.96615 | -0.21057 | 0.38441957  | 0.727797788 |
| 0        | 0        | 0        | #NUM!    | NA          | NA          |
| 499.4353 | 473.7776 | 578.4711 | -0.26033 | 0.455280748 | 0.151699323 |
| 961.346  | 998.6489 | 970.4062 | 0.044361 | 0.792868376 | 0.843790109 |
| 1324.084 | 1228.106 | 1396.924 | -0.04788 | 0.941098554 | 0.832900164 |
| 3790.884 | 3658.307 | 3143.865 | 0.210876 | 0.16816951  | 0.258978375 |
| 119.7215 | 120.7668 | 106.8914 | -0.02515 | 0.507065266 | 0.965791283 |
| 1881.594 | 1762.267 | 1718.646 | 0.202115 | 0.03049807  | 0.365275241 |
| 3523.744 | 3456.719 | 3644.787 | -0.19392 | 0.185152106 | 0.087076242 |
| 6482.832 | 6323.538 | 6678.617 | -0.10105 | 0.914186189 | 0.483238043 |
| 62.5411  | 108.6902 | 134.1382 | 0.447863 | 0.598960113 | 0.398659502 |
| 683.4849 | 689.3    | 818.4528 | -0.07727 | 0.32066134  | 0.755018053 |
| 13893.95 | 13035.39 | 16247.49 | 0.082043 | 0.827268091 | 0.666854583 |
| 771.9358 | 824.9305 | 795.3978 | -0.19787 | 0.842806932 | 0.214649394 |
| 179.5823 | 134.7015 | 197.0155 | 0.068002 | 0.451912698 | 0.883280306 |
| 4402.893 | 4617.939 | 4160.381 | -0.03712 | 0.031037731 | 0.859505388 |
| 6917.939 | 6568.788 | 6151.495 | 0.019861 | 0.003385807 | 0.921848549 |
| 2188.045 | 2252.766 | 2218.521 | -0.07479 | 0.711479158 | 0.669238482 |
| 858.5999 | 832.3623 | 826.8364 | -0.20415 | 0.733632007 | 0.181864152 |
| 768.3621 | 701.3767 | 761.8632 | -0.07806 | 0.1975101   | 0.71014908  |

|          |          |          |          |             |             |
|----------|----------|----------|----------|-------------|-------------|
| 1051.584 | 1014.442 | 926.3921 | 0.051176 | 0.622651984 | 0.818409186 |
| 535.1731 | 471.9197 | 465.292  | 0.037809 | 0.617661583 | 0.908612163 |
| 17.86889 | 18.57952 | 23.05501 | -0.47348 | 0.134982398 | NA          |
| 544.1076 | 464.4879 | 477.8674 | 0.365619 | 0.134588876 | 0.25282015  |
| 9.827887 | 11.14771 | 17.81523 | 0.614052 | 0.965666941 | NA          |
| 3329.867 | 3223.546 | 2913.315 | 0.026619 | 0.001792577 | 0.91372954  |
| 1447.38  | 1336.796 | 1234.491 | 0.058596 | 0.777280242 | 0.755018053 |
| 1465.249 | 1290.347 | 1150.654 | 0.041324 | 0.798439173 | 0.86344732  |
| 3231.588 | 3116.714 | 2473.174 | 0.196245 | 0.813397158 | 0.477547118 |
| 6035.216 | 5811.672 | 5657.908 | -0.0245  | 0.000144604 | 0.881988452 |
| 7967.736 | 7768.095 | 7240.32  | 0.10354  | 0.014547812 | 0.575540189 |
| 0        | 3.715903 | 3.143865 | -0.39341 | NA          | NA          |
| 0        | 0        | 0        | #DIV/0!  | NA          | NA          |
| 1155.223 | 1190.018 | 1249.162 | 0.005104 | 0.14394509  | 0.988370025 |
| 913.1    | 914.1121 | 1044.811 | -0.14758 | 0.172063056 | 0.40615036  |
| 1800.29  | 1915.548 | 1935.573 | -0.00493 | 0.770144773 | 0.988996303 |
| 4255.475 | 4096.783 | 4387.787 | -0.13836 | 0.550503835 | 0.351487828 |
| 1056.945 | 1099.907 | 1010.229 | 0.279432 | 0.105688589 | 0.178362257 |
| 1194.535 | 1182.586 | 1089.873 | 0.164796 | 0.200422675 | 0.356994802 |
| 311.812  | 317.7097 | 302.859  | 0.066269 | 0.941273396 | 0.851129209 |
| 1020.313 | 1030.234 | 993.4612 | 0.059419 | 0.406960002 | 0.770283785 |
| 285.0087 | 339.0762 | 293.4274 | -0.09022 | 0.854046275 | 0.773113821 |
| 271.6071 | 310.2779 | 283.9958 | -0.14667 | 0.944990108 | 0.551771495 |
| 1322.298 | 1277.342 | 1378.061 | -0.14736 | 0.999122571 | 0.414929365 |
| 1056.051 | 1083.186 | 946.3033 | 0.097202 | 0.828379866 | 0.639253997 |
| 167.9675 | 157.9259 | 202.2553 | -0.62048 | 0.086476182 | 0.00621807  |
| 149.2052 | 118.9089 | 102.6996 | -0.25885 | 0.000791163 | 0.487331989 |
| 401.1565 | 415.2522 | 370.976  | -0.3687  | 0.25618841  | 0.089560109 |
| 12.50822 | 5.573855 | 8.383639 | 0.231017 | 0.6212524   | NA          |
| 2339.037 | 2434.845 | 2154.595 | 0.19414  | 0.268149097 | 0.321629539 |
| 0.893444 | 0        | 1.047955 | -1.38183 | NA          | NA          |
| 600.3945 | 533.2321 | 641.3484 | -0.29963 | 0.58195463  | 0.086239424 |
| 529.8124 | 455.1981 | 504.0663 | -0.27391 | 0.005578646 | 0.129374309 |
| 490.5009 | 512.7946 | 504.0663 | 0.069129 | 0.960823113 | 0.806564543 |
| 403.8368 | 419.897  | 352.1128 | 0.128289 | 0.622518586 | 0.689648756 |
| 1004.231 | 1024.66  | 1079.394 | 0.104307 | 0.769710962 | 0.522768261 |
| 1878.02  | 2027.954 | 1649.481 | 0.279706 | 0.462231702 | 0.062642702 |
| 312.7055 | 299.1302 | 232.646  | 0.569529 | 0.859167103 | 0.081190592 |
| 663.8291 | 647.4961 | 673.835  | -0.25199 | 0.362317042 | 0.127757998 |
| 832.69   | 793.3453 | 646.5882 | 0.224261 | 0.682715357 | 0.299903133 |
| 1048.01  | 974.4956 | 911.7208 | 0.180097 | 0.959739969 | 0.420331471 |
| 14.29511 | 17.65054 | 12.57546 | 0.168166 | 0.812875146 | NA          |
| 781.7637 | 755.2573 | 713.6573 | 0.271861 | 0.834965572 | 0.258108467 |
| 749.5997 | 679.0813 | 750.3357 | -0.21399 | 0.311697167 | 0.225630132 |
| 217.107  | 220.1673 | 226.3583 | 0.104697 | 0.989430108 | 0.769493959 |
| 968.4936 | 952.2002 | 1019.66  | -0.13956 | 0.053161529 | 0.446206763 |
| 3420.998 | 3517.102 | 3940.31  | 0.136635 | 0.881060269 | 0.507147953 |
| 346.6564 | 450.5532 | 409.7504 | -0.16357 | 0.953403647 | 0.578656471 |
| 50.92632 | 28.79825 | 57.63752 | 1.121818 | 0.365690431 | NA          |
| 3044.858 | 3080.484 | 3201.502 | -0.21472 | 0.798030968 | 0.163023482 |
| 7587.129 | 7633.394 | 7383.89  | -0.04438 | 0.926756894 | 0.763891732 |
| 1827.987 | 1986.15  | 1703.975 | 0.261746 | 0.484196095 | 0.198030129 |
| 857.7065 | 814.7117 | 862.4669 | 0.047484 | 0.766887678 | 0.838085776 |
| 439.5746 | 497.931  | 404.5106 | 0.132083 | 0.837529432 | 0.691450677 |

|          |          |          |             |             |             |
|----------|----------|----------|-------------|-------------|-------------|
| 336.8285 | 409.6783 | 365.7363 | -0.24932    | 0.970055623 | 0.262359598 |
| 37717.64 | 36779.08 | 35759.36 | 0.169847    | 0.443017929 | 0.318281735 |
| 130.4429 | 150.4941 | 140.426  | 0.085293    | 0.803184945 | 0.875604624 |
| 1975.405 | 1894.182 | 1963.867 | 0.146904    | 0.021160717 | 0.38666632  |
| 288.5825 | 349.2949 | 367.8322 | 0.160532    | 0.811220717 | 0.726818972 |
| 752.2801 | 713.4534 | 660.2116 | 0.156246    | 0.906767387 | 0.487357424 |
| 356.4843 | 351.1528 | 369.9281 | -0.1321     | 0.272100977 | 0.621324733 |
| 2988.571 | 2846.382 | 2952.089 | -0.23231    | 0.071282701 | 0.225879379 |
| 238.5496 | 326.9995 | 342.6813 | 0.083463    | 0.246611129 | 0.859505388 |
| 394.9024 | 354.8687 | 332.2017 | 0.017284    | 0.714180196 | 0.955305678 |
| 4418.975 | 4639.305 | 5115.068 | -0.13595    | 0.899176451 | 0.487331989 |
| 959.5591 | 922.4729 | 792.2539 | 0.350654    | 0.62974082  | 0.060691739 |
| 22700.63 | 23179.8  | 23671.21 | -0.42059    | 0.745767703 | 0.012748693 |
| 356.4843 | 316.7807 | 410.7983 | 0.181776    | 0.962011634 | 0.520301247 |
| 2423.914 | 2714.467 | 2411.344 | 0.063866    | 0.998398411 | 0.708596546 |
| 4694.156 | 3997.383 | 4051.394 | 0.161339    | 0.056337167 | 0.505493145 |
| 4837.107 | 4743.35  | 5103.54  | -0.64869    | 0.897759686 | 7.83084E-07 |
| 603.0749 | 600.1183 | 484.1552 | 0.097176    | 0.907095813 | 0.729565723 |
| 2465.906 | 2506.377 | 2522.427 | 0.163014    | 0.024577856 | 0.41069386  |
| 839.8376 | 811.9248 | 735.6643 | 0.152179    | 0.033849408 | 0.51433656  |
| 511.0501 | 432.9027 | 572.1834 | -0.26705    | 0.730407446 | 0.229480039 |
| 1571.568 | 1591.335 | 1953.388 | -0.19802    | 0.812875146 | 0.425191741 |
| 0        | 2.786927 | 0        | -0.10793 NA | NA          |             |
| 64.32799 | 36.23005 | 62.87729 | 0.49169     | 0.792383666 | 0.414929365 |
| 91.13131 | 79.89192 | 55.54161 | -0.48885    | 0.945870306 | 0.343544446 |
| 816.6081 | 955.9161 | 753.4796 | 0.298906    | 0.701216566 | 0.161220563 |
| 300.1973 | 320.4966 | 222.1664 | 0.02042     | 0.597146011 | 0.971161723 |
| 11361.04 | 11549.03 | 11156.53 | -0.08536    | 0.077745036 | 0.357987739 |
| 3319.145 | 3150.157 | 3017.062 | 0.133511    | 0.917703668 | 0.342128545 |
| 2655.316 | 2432.988 | 2397.721 | 0.19713     | 0.577332911 | 0.147355085 |
| 248.3775 | 252.6814 | 194.9196 | 0.711227    | 0.526006956 | 0.007323791 |
| 221.5742 | 151.423  | 177.1044 | -0.72477    | 0.311933404 | 0.0104057   |
| 546.7879 | 591.7576 | 530.2652 | 0.014151    | 0.738468335 | 0.964158522 |
| 559.2961 | 503.5049 | 408.7024 | 0.10607     | 0.854862911 | 0.729059351 |
| 80.40998 | 78.03396 | 90.12412 | -0.11021    | 0.585762809 | 0.859199438 |
| 259.0988 | 270.3319 | 280.8519 | -0.61828    | 4.64116E-13 | 0.060691739 |
| 234.0824 | 217.3803 | 294.4753 | -0.06535    | 0.572336545 | 0.838059844 |
| 1516.175 | 1463.137 | 1254.402 | 0.229305    | 0.570003668 | 0.299395231 |
| 754.9604 | 788.7004 | 754.5275 | -0.12848    | 0.311819514 | 0.494493869 |
| 5.360666 | 5.573855 | 11.5275  | 0.378245 NA | NA          |             |
| 739.7718 | 705.0926 | 726.2327 | 0.111499    | 0.735300868 | 0.616511903 |
| 1232.953 | 1323.79  | 1157.99  | 0.319674    | 0.429368942 | 0.098098196 |
| 823.7556 | 825.8595 | 864.5628 | -0.06876    | 0.27470085  | 0.742276559 |
| 81.30343 | 62.24138 | 76.50071 | 0.075281    | 0.384189305 | 0.923725803 |
| 0        | 0        | 0        | #NUM! NA    | NA          |             |
| 1104.297 | 1089.689 | 1229.251 | 0.099613    | 0.804410815 | 0.660222897 |
| 12493.92 | 12948.06 | 13688.39 | -0.1367     | 0.921802179 | 0.489096476 |
| 285.9022 | 328.8574 | 320.6742 | 0.049626    | 0.35165001  | 0.875604624 |
| 139.3773 | 143.0623 | 198.0635 | 0.33439     | 0.045192099 | 0.382141979 |
| 4488.664 | 4342.033 | 4949.491 | 0.019694    | 0.447580006 | 0.948574402 |
| 16642.19 | 16703.91 | 17503.99 | -0.45152    | 0.982305383 | 0.001735941 |
| 6964.398 | 7054.642 | 7275.951 | -0.01915    | 0.730204074 | 0.908612163 |
| 1532.257 | 1491.935 | 1451.418 | 0.056527    | 0.547416205 | 0.814086627 |
| 830.0097 | 834.2202 | 816.3569 | 0.135344    | 0.232757941 | 0.398655382 |

|          |          |          |          |             |             |
|----------|----------|----------|----------|-------------|-------------|
| 1782.421 | 1849.591 | 1964.915 | 0.073327 | 0.234799471 | 0.653821279 |
| 0        | 2.786927 | 2.09591  | -1.52678 | NA          |             |
| 742.4522 | 871.3793 | 929.536  | -0.18684 | 0.254252351 | 0.383759687 |
| 1721.667 | 1773.415 | 1695.591 | 0.121854 | 0.556307283 | 0.487357424 |
| 32351.62 | 31433.75 | 31734.17 | -0.30134 | 0.755573717 | 0.007579991 |
| 825.5425 | 851.8708 | 813.213  | 0.262243 | 0.285086597 | 0.36518668  |
| 801.4195 | 751.5414 | 924.2962 | -0.35502 | 0.355572646 | 0.027769084 |
| 393.1155 | 315.8518 | 283.9958 | 0.496124 | 0.085195908 | 0.088369497 |
| 1756.511 | 1758.551 | 1610.707 | 0.080103 | 0.340035461 | 0.675143077 |
| 936.3296 | 819.3566 | 774.4387 | 0.289357 | 0.323780681 | 0.200725526 |
| 457.4435 | 414.3232 | 410.7983 | -0.00606 | 0.226105917 | 0.990142758 |
| 318.0662 | 399.4596 | 356.3047 | -0.16757 | 0.296056707 | 0.502183544 |
| 841.6245 | 953.1291 | 1023.852 | -0.00441 | 0.723947258 | 0.990142758 |
| 681.698  | 604.7632 | 726.2327 | 0.258625 | 0.648256394 | 0.183989501 |
| 1125.74  | 1083.186 | 1272.217 | 0.055394 | 0.556706854 | 0.85050204  |
| 763.8948 | 626.1297 | 669.6432 | 0.12852  | 0.623348614 | 0.664215073 |
| 698.6734 | 638.2063 | 570.0875 | 0.190964 | 0.642246351 | 0.306279885 |
| 704.0341 | 738.5357 | 828.9323 | -0.13415 | 0.992476114 | 0.472093197 |
| 544.1076 | 532.3031 | 461.1002 | 0.129774 | 0.853320493 | 0.600875554 |
| 676.3373 | 740.3937 | 840.4598 | -0.00918 | 0.147125509 | 0.973002234 |
| 0.893444 | 2.786927 | 0        | -1.23132 | NA          |             |
| 1842.282 | 1747.403 | 1565.645 | 0.239964 | 0.211449188 | 0.161220563 |
| 1199.896 | 1184.444 | 1085.681 | 0.188336 | 0.787792061 | 0.438623687 |
| 1733.282 | 1925.767 | 1863.264 | -0.00974 | 0.596065856 | 0.965253376 |
| 1203.469 | 1094.333 | 1109.784 | 0.086411 | 0.6207623   | 0.656368654 |
| 360.058  | 357.6557 | 402.4147 | -0.07279 | 0.728952588 | 0.811374268 |
| 92.9182  | 66.88625 | 88.02821 | -0.13973 | 0.804201321 | 0.840718213 |
| 626.3044 | 661.4307 | 618.2934 | 0.192072 | 0.606270396 | 0.360674621 |
| 658.4684 | 857.4446 | 663.3554 | 0.210641 | 0.200039625 | 0.472093197 |
| 4514.574 | 4246.348 | 4287.183 | 0.008045 | 0.005036606 | 0.971658868 |
| 499.4353 | 459.843  | 499.8745 | -0.04133 | 0.947037414 | 0.864252513 |
| 520.878  | 402.2465 | 505.1143 | -0.15095 | 0.904254847 | 0.49318083  |
| 1798.503 | 1711.173 | 1749.037 | 0.204273 | 0.282011296 | 0.361564535 |
| 2530.234 | 2317.795 | 2329.604 | 0.208608 | 0.976681492 | 0.104998235 |
| 3273.58  | 3308.083 | 3204.646 | -0.03713 | 0.000148829 | 0.819004    |
| 585.206  | 586.1837 | 543.8886 | 0.347223 | 0.394915233 | 0.060851524 |
| 508.3698 | 516.5105 | 403.4626 | 0.071876 | 0.675005225 | 0.856558496 |
| 2852.768 | 2676.379 | 2849.389 | 0.13255  | 0.905394249 | 0.329925488 |
| 1990.594 | 1916.477 | 1986.922 | -0.05975 | 0.897759686 | 0.724404377 |
| 1619.814 | 1503.083 | 1566.693 | 0.075104 | 0.665579954 | 0.727738403 |
| 1083.748 | 1164.007 | 1399.02  | -0.47834 | 0.466138921 | 0.001735941 |
| 2507.005 | 2479.436 | 2075.999 | 0.180488 | 0.362090257 | 0.38666632  |
| 9.827887 | 22.29542 | 10.47955 | -0.26572 | 0.357841712 | NA          |
| 180.4757 | 174.6474 | 171.8646 | -0.11069 | 0.682715357 | 0.774230303 |
| 172.4347 | 154.21   | 176.0564 | 0.053546 | 0.240910061 | 0.884087376 |
| 712.9685 | 619.6268 | 620.3893 | 0.303392 | 0.779325825 | 0.149286183 |
| 6431.012 | 6736.932 | 7002.435 | -0.12284 | 0.991136341 | 0.365235491 |
| 3524.638 | 3767.926 | 4158.285 | -0.06236 | 0.582003857 | 0.746698677 |
| 509.2632 | 557.3855 | 427.5656 | 0.321129 | 0.245394561 | 0.244704905 |
| 149.2052 | 165.3577 | 149.8575 | -0.26403 | 0.926756894 | 0.422116695 |
| 454.7631 | 394.8147 | 446.4288 | 0.113452 | 0.885365393 | 0.656368654 |
| 243.0168 | 234.1019 | 275.6121 | -0.24366 | 0.985859213 | 0.426226797 |
| 812.1408 | 847.2259 | 762.9112 | 0.163723 | 0.674403807 | 0.381727979 |
| 375.2466 | 353.9398 | 429.6615 | 0.22186  | 7.81293E-07 | 0.431825344 |

|          |          |          |          |             |             |
|----------|----------|----------|----------|-------------|-------------|
| 1127.527 | 1196.521 | 1191.525 | 0.161026 | 0.478308661 | 0.389216061 |
| 967.6001 | 890.8878 | 1078.346 | 0.031292 | 0.410903637 | 0.902851746 |
| 765.6817 | 831.4333 | 813.213  | -0.06706 | 0.088789496 | 0.791888862 |
| 939.0099 | 954.0581 | 942.1114 | -0.0025  | 0.732140966 | 0.997242119 |
| 1794.036 | 1752.977 | 1909.374 | -0.01073 | 0.718383563 | 0.961026715 |
| 676.3373 | 729.246  | 678.0268 | 0.057891 | 0.384584076 | 0.830593197 |
| 14404.11 | 14090.7  | 15986.55 | 0.476241 | 0.093120159 | 0.000106385 |
| 201.9184 | 175.5764 | 208.543  | 0.487918 | 0.732140966 | 0.10999387  |
| 7.147554 | 9.289758 | 5.239774 | 0.640168 | 0.365953812 | NA          |
| 12276.82 | 12330.3  | 13401.25 | -0.25338 | 0.844410461 | 0.04168446  |
| 582.5257 | 474.7066 | 433.8533 | 0.35764  | 0.373700455 | 0.167165088 |
| 138.4839 | 143.9912 | 140.426  | -0.28051 | 0.941323092 | 0.575546698 |
| 0        | 0        | 0        | #NUM!    | NA          |             |
| 1827.987 | 1686.091 | 1812.962 | 0.158455 | 0.910682739 | 0.372768179 |
| 1181.133 | 1094.333 | 954.6869 | 0.12126  | 0.691366556 | 0.5608115   |
| 3089.53  | 2963.433 | 2963.616 | -0.01327 | 0.179898822 | 0.930336535 |
| 106.3199 | 98.47143 | 105.8434 | -0.2132  | 0.852550008 | 0.659046549 |
| 184.943  | 192.298  | 234.7419 | 0.019845 | 0.996328617 | 0.966975973 |
| 7.147554 | 8.360782 | 4.19182  | 0.758588 | 0.774889037 | NA          |
| 421.7057 | 483.0674 | 486.2511 | -0.08628 | 0.935100162 | 0.741928459 |
| 96.49198 | 150.4941 | 137.2821 | -0.5441  | 0.918426622 | 0.129705424 |
| 1579.609 | 1752.048 | 1725.982 | 0.000472 | 0.490249604 | 0.999675887 |
| 1110.551 | 1281.987 | 1216.676 | -0.15158 | 0.853195053 | 0.422560599 |
| 4176.852 | 4165.527 | 4244.217 | -0.0052  | 0.036897698 | 0.971658868 |
| 1422.363 | 1386.961 | 1276.409 | 0.404984 | 0.042369293 | 0.002256075 |
| 430.6401 | 366.0165 | 489.3949 | -0.16991 | 0.77572403  | 0.513869895 |
| 0        | 0        | 0        | #DIV/0!  | NA          |             |
| 597.7142 | 571.3201 | 451.6686 | 0.163422 | 0.111187725 | 0.486822267 |
| 1888.741 | 1911.832 | 1858.024 | 0.178999 | 0.842165531 | 0.244742241 |
| 2598.136 | 2691.243 | 2773.937 | 0.832209 | 0.233378357 | 2.4117E-09  |
| 867.5344 | 874.1662 | 796.4457 | 0.18583  | 0.767300341 | 0.483184001 |
| 705.821  | 811.9248 | 748.2398 | -0.09221 | 0.935960933 | 0.649685593 |
| 1335.699 | 1215.1   | 1273.265 | 0.278113 | 0.799313452 | 0.159445896 |
| 176.902  | 207.1616 | 209.591  | -0.24583 | 0.80496489  | 0.422116695 |
| 35.73777 | 13.00566 | 32.4866  | 0.195705 | 0.937423565 | NA          |
| 0.893444 | 2.786927 | 7.335684 | 0.231999 | NA          |             |
| 477.9927 | 461.701  | 622.4852 | -0.25865 | 0.880275635 | 0.318625647 |
| 654.8946 | 645.6382 | 626.677  | -0.10041 | 0.340833229 | 0.59853578  |
| 2879.571 | 2780.424 | 2486.797 | 0.250252 | 0.119516174 | 0.247256105 |
| 547.6813 | 554.5985 | 459.0042 | -0.00658 | 0.631766123 | 0.988370025 |
| 630.7716 | 659.5728 | 553.3202 | 0.194717 | 0.739610643 | 0.381582724 |
| 601.288  | 588.0417 | 554.3681 | -0.09921 | 0.792868376 | 0.684119849 |
| 2003.102 | 2039.102 | 1936.621 | 0.092948 | 0.459794863 | 0.669238482 |
| 243.0168 | 190.44   | 223.2144 | -0.29125 | 0.465047544 | 0.315911601 |
| 595.0339 | 651.212  | 557.512  | -0.06786 | 0.007990209 | 0.79699678  |
| 2110.315 | 2103.201 | 1924.045 | 0.206349 | 0.670790001 | 0.222710488 |
| 315.3858 | 358.5846 | 322.7701 | -0.02353 | 0.458953645 | 0.941511899 |
| 1350.888 | 1512.373 | 1593.939 | -0.09778 | 0.736846903 | 0.690294956 |
| 21850.97 | 20466.27 | 22424.14 | 0.183331 | 0.835682217 | 0.089171213 |
| 1159.691 | 1007.01  | 962.0226 | 0.306043 | 0.140612719 | 0.327516537 |
| 969.387  | 1170.509 | 899.1453 | 0.325368 | 0.345313334 | 0.22952299  |
| 730.8374 | 716.2403 | 604.67   | 0.205225 | 0.927256678 | 0.399254174 |
| 311.812  | 368.8034 | 428.6136 | 0.12601  | 0.639085319 | 0.694075461 |
| 431.5336 | 431.9737 | 440.1411 | 0.298299 | 0.107676441 | 0.370304803 |

|          |          |          |             |                |             |
|----------|----------|----------|-------------|----------------|-------------|
| 769.2555 | 725.5301 | 720.993  | 0.166727    | 0.033849408    | 0.320519165 |
| 657.575  | 806.351  | 716.8011 | -0.09541    | 0.812875146    | 0.659046549 |
| 377.9269 | 281.4797 | 316.4824 | -0.10788    | 0.550503835    | 0.780325172 |
| 6.25411  | 6.50283  | 7.335684 | 1.741989 NA | NA             |             |
| 3948.13  | 3748.417 | 4031.482 | 0.02077     | 0.834965572    | 0.942591831 |
| 1178.453 | 1235.538 | 1083.585 | -0.21066    | 0.484625827    | 0.193131605 |
| 2866.169 | 2858.458 | 3264.379 | 0.054497    | 0.458486853    | 0.778929671 |
| 574.4847 | 618.6979 | 692.6982 | -0.24431    | 0.215286681    | 0.238463934 |
| 1549.232 | 1641.5   | 1665.2   | -0.25406    | 0.470002734    | 0.015466264 |
| 106.3199 | 72.46011 | 82.78844 | -0.82775    | 0.936879535    | 0.018151008 |
| 70.5821  | 67.81523 | 66.02116 | -0.87026    | 0.000217366    | 0.011236162 |
| 10950.05 | 11230.39 | 11207.88 | -0.22983    | 0.840099446    | 0.144365513 |
| 2851.874 | 2767.419 | 2883.972 | -0.03395    | 0.677154401    | 0.830385228 |
| 28.59022 | 18.57952 | 25.15092 | 0.285657    | 0.947783958 NA |             |
| 4.467221 | 8.360782 | 18.86319 | -0.46627    | 0.748298735 NA |             |
| 2265.775 | 2325.226 | 2221.664 | -0.04442    | 0.004702869    | 0.832722668 |
| 4787.074 | 4883.626 | 4711.605 | -0.10003    | 0.990604058    | 0.58052356  |
| 3314.678 | 3289.503 | 3150.152 | 0.053247    | 0.528927394    | 0.76917002  |
| 282.3284 | 278.6927 | 285.0437 | -0.2455     | 0.857493953    | 0.273534982 |
| 3049.325 | 2971.793 | 3061.076 | 0.018413    | 0.329402028    | 0.914772543 |
| 550.3617 | 528.5872 | 623.5332 | -0.00709    | 0.731963541    | 0.984456511 |
| 4287.639 | 4456.297 | 5500.715 | -0.24711    | 0.812875146    | 0.163640813 |
| 543.2141 | 411.5363 | 451.6686 | 0.223574    | 0.962660515    | 0.386078627 |
| 427.0664 | 526.7293 | 439.0931 | -0.12135    | 0.190992184    | 0.622775043 |
| 1432.191 | 1352.589 | 1178.949 | 0.385708    | 0.179898822    | 0.131512208 |
| 1.786889 | 2.786927 | 0        | #DIV/0! NA  | NA             |             |
| 503.0091 | 502.5759 | 562.7518 | -0.5014     | 0.051978056    | 0.002570942 |
| 824.6491 | 839.7941 | 645.5402 | 0.226056    | 0.682715357    | 0.292916323 |
| 573.5912 | 441.2635 | 523.9774 | -0.20618    | 0.948234757    | 0.379367723 |
| 1410.748 | 1270.839 | 1575.076 | -0.00396    | 0.92288341     | 0.990142758 |
| 1082.854 | 1272.697 | 1287.937 | -0.32173    | 0.603004299    | 0.023502597 |
| 461.9107 | 479.3515 | 445.3808 | 0.070119    | 0.509454999    | 0.840718213 |
| 1023.887 | 1044.169 | 924.2962 | 0.143955    | 0.394915233    | 0.578237014 |
| 580.7388 | 541.5929 | 588.9507 | 0.036149    | 0.79077061     | 0.884746998 |
| 254.6316 | 185.7952 | 209.591  | -0.22794    | 0.46334755     | 0.465657685 |
| 1977.192 | 2066.042 | 1899.942 | -0.11034    | 0.231513117    | 0.388495658 |
| 8.040998 | 8.360782 | 9.431594 | -1.56135    | 0.783760899 NA |             |
| 1690.397 | 1571.827 | 1563.549 | 0.218308    | 0.959739969    | 0.178822023 |
| 997.9772 | 980.9984 | 1017.564 | -0.01831    | 0.992476114    | 0.940307062 |
| 23980.94 | 24236.05 | 27071.82 | -0.48672    | 0.824080056    | 0.001357562 |
| 906.8459 | 901.1065 | 935.8237 | -0.18039    | 0.203841572    | 0.379845684 |
| 815.7146 | 909.4673 | 925.3442 | -0.17776    | 0.93284858     | 0.335921009 |
| 1557.273 | 1548.603 | 1665.2   | -0.0323     | 0.574512226    | 0.875929853 |
| 1515.281 | 1354.447 | 1261.738 | 0.393044    | 0.424996881    | 0.102617483 |
| 1738.643 | 1713.031 | 1450.37  | 0.058173    | 0.221695862    | 0.817988115 |
| 438.6811 | 494.2151 | 426.5176 | 0.126276    | 0.918350023    | 0.627713216 |
| 404.7302 | 425.4709 | 450.6206 | 0.055133    | 0.777781833    | 0.836257824 |
| 5141.772 | 5069.421 | 5114.02  | -0.10146    | 0.258431804    | 0.387635019 |
| 3.573777 | 9.289758 | 4.19182  | -1.43791    | 0.937354907 NA |             |
| 99.17231 | 121.6958 | 107.9394 | 0.041343    | 0.774889037    | 0.93327699  |
| 4.467221 | 3.715903 | 4.19182  | 0.618093    | 0.429368942 NA |             |
| 1251.715 | 1361.878 | 1451.418 | -0.21757    | 0.867574132    | 0.27042216  |
| 1195.428 | 1134.279 | 1028.044 | 0.10522     | 0.218571331    | 0.627713216 |
| 1646.618 | 1521.662 | 1672.536 | 0.118307    | 0.179898822    | 0.579998211 |

|          |          |          |          |             |             |
|----------|----------|----------|----------|-------------|-------------|
| 343.976  | 264.7581 | 250.4612 | 0.87979  | 0.539046349 | 0.009996213 |
| 202.8118 | 238.7468 | 243.1255 | -0.15356 | 0.367802825 | 0.612574138 |
| 292.1563 | 357.6557 | 301.811  | -0.04494 | 0.713081901 | 0.896567419 |
| 409.1975 | 442.1925 | 448.5247 | 0.030295 | 0.00565249  | 0.931618549 |
| 0        | 0        | 0        | #DIV/0!  | NA          |             |
| 820.1818 | 756.1863 | 733.5684 | 0.264912 | 0.948896953 | 0.271247752 |
| 748.7063 | 673.5074 | 779.6784 | 0.086521 | 0.00602068  | 0.672998339 |
| 11956.07 | 11562.03 | 11874.38 | 0.393686 | 0.957754117 | 2.43041E-05 |
| 339.5088 | 315.8518 | 321.7222 | -0.42909 | 0.337999896 | 0.027816164 |
| 338.6154 | 380.8801 | 329.0578 | 0.163687 | 0.228848778 | 0.549038919 |
| 4.467221 | 0.928976 | 2.09591  | -0.29924 | NA          |             |
| 1.786889 | 0        | 0        | #DIV/0!  | NA          |             |
| 16.082   | 33.44313 | 42.96615 | 0.2442   | 0.873415892 | NA          |
| 852.3458 | 814.7117 | 624.5811 | 0.25573  | 0.901132408 | 0.294052191 |
| 8297.417 | 8752.81  | 8025.239 | 0.008289 | 0.310443697 | 0.964000071 |
| 1028.354 | 936.4076 | 901.2412 | 0.257589 | 0.2795135   | 0.360674621 |
| 373.4597 | 434.7607 | 320.6742 | 0.163013 | 0.579415204 | 0.552800466 |
| 610.2224 | 546.2377 | 510.354  | 0.250101 | 0.58004353  | 0.325477034 |
| 50.03288 | 50.16469 | 96.41185 | -0.21474 | 0.874036182 | 0.831655346 |
| 146.5249 | 164.4287 | 180.2482 | 0.147036 | 0.966586541 | 0.734906514 |
| 788.9113 | 948.4843 | 869.8026 | 0.070319 | 0.081224331 | 0.746662168 |
| 1105.191 | 1044.169 | 1010.229 | -0.17097 | 0.303314321 | 0.311826056 |
| 654.8946 | 629.8456 | 888.6657 | -0.4077  | 0.94035236  | 0.030371149 |
| 0        | 1.857952 | 0        | #DIV/0!  | NA          |             |
| 552.1486 | 517.4395 | 559.6079 | -0.00216 | 0.960956671 | 0.991339835 |
| 557.5092 | 498.86   | 565.8956 | 0.165709 | 0.864963799 | 0.477770886 |
| 838.9442 | 794.2743 | 759.7673 | -0.06762 | 0.980409444 | 0.794422811 |
| 1701.118 | 1723.25  | 1620.138 | -0.39609 | 0.179898822 | 0.000129741 |
| 2529.341 | 2485.01  | 2292.925 | 0.103014 | 0.725429407 | 0.551050851 |
| 426.1729 | 433.8317 | 531.3131 | 0.065479 | 0.941098554 | 0.864290969 |
| 620.9438 | 613.124  | 564.8477 | 0.120553 | 0.903271991 | 0.655129754 |
| 14.29511 | 18.57952 | 8.383639 | -0.35434 | 0.935163971 | NA          |
| 2783.972 | 2578.837 | 2641.894 | -0.04876 | 0.172896395 | 0.797601985 |
| 587.8863 | 676.2944 | 574.2793 | 0.071186 | 0.482562486 | 0.803989183 |
| 1515.281 | 1471.498 | 1301.56  | 0.035149 | 0.556307283 | 0.883471187 |
| 637.9192 | 692.0869 | 696.89   | -0.11352 | 0.98843748  | 0.579998211 |
| 552.1486 | 694.8739 | 602.5741 | 0.04695  | 0.482562486 | 0.886786965 |
| 1122.166 | 1018.157 | 1009.181 | 0.182088 | 0.113562986 | 0.311435996 |
| 2993.932 | 2969.007 | 3032.781 | -0.11529 | 0.567906243 | 0.422793542 |
| 289.4759 | 315.8518 | 295.5233 | -0.05662 | 0.484625827 | 0.872630949 |
| 2093.34  | 2168.229 | 2110.581 | -0.04846 | 0.365953812 | 0.774121067 |
| 7178.825 | 6734.145 | 6572.773 | 0.192913 | 0.208221128 | 0.134770011 |
| 1097.15  | 1055.316 | 1083.585 | 0.163834 | 0.164920979 | 0.313958096 |
| 806.7802 | 852.7997 | 949.4471 | -0.24127 | 0.785492922 | 0.164384321 |
| 32.16399 | 17.65054 | 20.9591  | -0.16018 | 0.918350023 | NA          |
| 3.573777 | 0        | 6.287729 | 0.016542 | 0.761181704 | NA          |
| 528.919  | 601.0473 | 586.8547 | 0.01343  | 0.876058554 | 0.975879427 |
| 4.467221 | 4.644879 | 10.47955 | -0.73765 | 0.899176451 | NA          |
| 140.2707 | 167.2156 | 127.8505 | -0.05416 | 0.996781128 | 0.919055186 |
| 547.6813 | 583.3968 | 651.8279 | -0.28304 | 0.208221128 | 0.104692027 |
| 1716.306 | 1620.134 | 1613.851 | -0.05963 | 0.831317845 | 0.700302444 |
| 982.7887 | 829.5754 | 709.4655 | 0.117311 | 0.146572219 | 0.687575419 |
| 2.680333 | 3.715903 | 3.143865 | 0.381405 | NA          |             |
| 2184.471 | 2231.4   | 2051.896 | 0.055267 | 0.006092421 | 0.722021255 |



|          |          |          |             |                |             |
|----------|----------|----------|-------------|----------------|-------------|
| 343.976  | 347.4369 | 244.1735 | 0.07419     | 0.212716004    | 0.815439094 |
| 2611.538 | 2599.274 | 2609.408 | -2.4E-05    | 0.830656714    | 0.99985654  |
| 2974.276 | 3085.129 | 2861.965 | 0.11463     | 0.639085319    | 0.489944774 |
| 510.1567 | 472.8487 | 463.1961 | 0.108975    | 0.795709704    | 0.638657543 |
| 1147.182 | 1097.12  | 1026.996 | 0.137945    | 0.2795135      | 0.469102863 |
| 446.7221 | 588.9706 | 485.2031 | -0.08545    | 0.320543105    | 0.764793691 |
| 22.33611 | 22.29542 | 19.91114 | -0.11001    | 0.542904501 NA |             |
| 737.985  | 826.7884 | 690.6023 | -0.10356    | 0.567589507    | 0.643988563 |
| 561.9764 | 491.4282 | 565.8956 | -0.04902    | 0.235461691    | 0.87417937  |
| 1073.027 | 1123.132 | 1040.619 | 0.176823    | 0.925203985    | 0.348491003 |
| 2265.775 | 1932.27  | 1722.838 | -0.0048     | 0.651388825    | 0.990142758 |
| 1216.871 | 1292.205 | 1211.436 | 0.09019     | 0.202320361    | 0.646200858 |
| 404.7302 | 435.6896 | 491.4908 | -0.02904    | 0.017639055    | 0.907473183 |
| 1098.043 | 1230.893 | 1160.086 | 0.168236    | 0.997889853    | 0.294466305 |
| 435.1074 | 336.2892 | 303.9069 | -0.09286    | 0.981762093    | 0.806564543 |
| 251.0578 | 208.0906 | 212.7348 | -0.10736    | 0.478531557    | 0.802920813 |
| 2284.537 | 2352.167 | 2256.247 | 0.375976    | 0.053912087    | 0.000421029 |
| 844.3048 | 786.8425 | 863.5148 | -0.20687    | 0.750700436    | 0.220273588 |
| 52669.43 | 50894.87 | 52012.1  | -0.25474    | 0.973772216    | 0.058966813 |
| 14.29511 | 19.50849 | 4.19182  | 1.136582    | 0.989430108 NA |             |
| 627.1979 | 642.8512 | 618.2934 | 0.079684    | 0.853477462    | 0.746898731 |
| 377.9269 | 340.9341 | 297.6192 | 0.248431    | 0.720425175    | 0.391432089 |
| 3001.973 | 3114.856 | 3153.296 | -0.14956    | 0.565106682    | 0.211432205 |
| 1260.65  | 1203.953 | 1199.908 | 0.161916    | 0.580937291    | 0.350427789 |
| 963.1329 | 1048.814 | 1197.812 | -0.50236    | 0.025591463    | 0.000192079 |
| 8080.31  | 7647.328 | 9411.683 | -0.07149    | 0.894177375    | 0.876430377 |
| 574.4847 | 593.6155 | 572.1834 | -0.61145    | 0.275308123    | 0.000109324 |
| 92.02476 | 57.5965  | 71.26093 | -0.13522    | 0.839922799    | 0.818645356 |
| 920.2476 | 971.7086 | 870.8505 | -0.233      | 0.668508083    | 0.186989586 |
| 539.6403 | 590.8286 | 720.993  | -0.24229    | 0.926795891    | 0.321405678 |
| 2.680333 | 4.644879 | 2.09591  | #DIV/0! NA  | NA             |             |
| 2190.725 | 2259.269 | 2128.396 | 0.087112    | 0.187777748    | 0.600823565 |
| 32144.34 | 31573.1  | 32594.54 | -0.40475    | 0.905623996    | 0.001866776 |
| 400.263  | 434.7607 | 420.2299 | 0.04973     | 0.798030968    | 0.864363898 |
| 92.9182  | 114.264  | 100.6037 | -0.30653    | 0.210289554    | 0.434560808 |
| 50.92632 | 39.94596 | 36.67842 | -0.238      | 0.774889037    | 0.684679019 |
| 467.2713 | 553.6696 | 520.8336 | -0.07212    | 0.766887678    | 0.832624087 |
| 11.61478 | 15.79259 | 22.00705 | -0.17938    | 0.842190796 NA |             |
| 0        | 3.715903 | 0        | -1.08851 NA | NA             |             |
| 1032.822 | 1075.754 | 985.0776 | 0.184103    | 0.828016939    | 0.406655479 |
| 573.5912 | 529.5162 | 553.3202 | 0.077045    | 0.91675117     | 0.809991249 |
| 357.3777 | 366.0165 | 366.7842 | -0.01244    | 0.858869281    | 0.984451848 |
| 562.8699 | 532.3031 | 682.2186 | -0.07697    | 0.079395817    | 0.788938862 |
| 1804.757 | 1795.71  | 1635.858 | 0.15333     | 0.751065001    | 0.268230461 |
| 10.72133 | 1.857952 | 2.09591  | -0.26638    | 0.766887678 NA |             |
| 480.673  | 419.897  | 439.0931 | 0.081414    | 0.766887678    | 0.739592868 |
| 22538.92 | 23205.81 | 24363.9  | -0.43687    | 0.974700015    | 0.001866776 |
| 9377.591 | 9312.053 | 8438.133 | -0.06575    | 0.185152106    | 0.647426135 |
| 42.88532 | 47.37776 | 58.68547 | 0.189387    | 0.46334755     | 0.778166558 |
| 2046.881 | 2200.744 | 2533.955 | -0.47972    | 0.947037414    | 0.000493703 |
| 1.786889 | 0        | 6.287729 | -2.34034 NA | NA             |             |
| 800.5261 | 676.2944 | 670.6911 | 0.094796    | 0.29215357     | 0.726171034 |
| 662.9356 | 752.4704 | 602.5741 | 0.115519    | 0.817609984    | 0.62247661  |
| 3.573777 | 10.21873 | 12.57546 | -0.60844    | 0.300155248 NA |             |

|          |          |          |             |                |             |
|----------|----------|----------|-------------|----------------|-------------|
| 595.9273 | 552.7406 | 504.0663 | -0.08524    | 0.839922799    | 0.712929046 |
| 3.573777 | 0        | 0        | -1.10614 NA | NA             |             |
| 6053.978 | 6109.874 | 5991.158 | -0.01442    | 0.987610613    | 0.938440797 |
| 2628.513 | 2613.209 | 2303.405 | 0.093768    | 0.126687185    | 0.755018053 |
| 860.3868 | 807.2799 | 682.2186 | 0.171156    | 0.577548143    | 0.380365797 |
| 1055.158 | 945.6973 | 977.7419 | 0.002434    | 0.249113533    | 0.992729462 |
| 259.0988 | 301.9171 | 260.9408 | -0.1708     | 0.542689845    | 0.578046344 |
| 85.77065 | 117.0509 | 120.5148 | -0.22442    | 0.923364203    | 0.658878607 |
| 3149.391 | 3188.245 | 2587.401 | 0.021012    | 0.870947007    | 0.956290296 |
| 406.5171 | 364.1585 | 308.0987 | 0.360448    | 0.73478662     | 0.298450788 |
| 682.5914 | 731.1039 | 533.409  | 0.282432    | 0.237605221    | 0.30206153  |
| 423.4926 | 457.9851 | 474.7236 | 0.144436    | 0.964929778    | 0.538616173 |
| 223.3611 | 199.7298 | 204.3512 | -0.01553    | 0.838103038    | 0.974467077 |
| 0        | 0.928976 | 0        | #DIV/0! NA  | NA             |             |
| 1518.855 | 1608.057 | 1615.946 | 0.030288    | 0.812875146    | 0.891918558 |
| 1499.199 | 1627.566 | 1706.071 | -0.15768    | 0.848694292    | 0.365235491 |
| 4648.59  | 4455.368 | 4800.681 | -0.20154    | 0.600642134    | 0.112510644 |
| 545.8944 | 572.2491 | 547.0325 | 0.091211    | 0.80496489     | 0.69424407  |
| 645.0668 | 627.0586 | 543.8886 | 0.108579    | 0.862447485    | 0.577717703 |
| 824.6491 | 1032.092 | 793.3019 | 0.161431    | 0.256151839    | 0.638645387 |
| 1125.74  | 1109.197 | 943.1594 | 0.287704    | 0.626260019    | 0.209280914 |
| 624.5175 | 565.7462 | 471.5797 | 0.316646    | 0.452580134    | 0.362764905 |
| 756.7473 | 644.7092 | 647.6361 | 0.104378    | 0.817609984    | 0.599528544 |
| 36.63121 | 57.5965  | 35.63047 | 0.286942    | 0.956677576    | 0.705641462 |
| 246.5906 | 255.4683 | 212.7348 | 0.157067    | 0.855563032    | 0.686015779 |
| 2163.922 | 2021.451 | 1670.44  | 0.234878    | 0.405505718    | 0.419821619 |
| 14.29511 | 9.289758 | 6.287729 | -0.83593    | 0.175067813 NA |             |
| 6008.413 | 5877.63  | 6751.973 | -0.37963    | 0.125178937    | 0.001988814 |
| 1582.29  | 1661.009 | 1895.75  | 0.015228    | 0.426735737    | 0.957059222 |
| 621.8372 | 675.3654 | 563.7997 | 0.051516    | 0.072365168    | 0.872630949 |
| 143.8445 | 145.8492 | 192.8237 | -0.09533    | 0.036671148    | 0.836904079 |
| 4200.975 | 4432.143 | 4364.732 | 0.058806    | 0.28625807     | 0.686712135 |
| 0.893444 | 0        | 0        | -1.74916 NA | NA             |             |
| 264.4595 | 286.1245 | 224.2623 | -0.01565    | 0.263755993    | 0.975406172 |
| 8.040998 | 7.431806 | 12.57546 | 0.314804    | 0.892614393 NA |             |
| 6817.873 | 6622.668 | 7615.488 | -0.14479    | 0.854862911    | 0.292916323 |
| 15209.1  | 15614.22 | 18740.58 | -0.45118    | 0.732718278    | 0.001157422 |
| 0        | 0        | 1.047955 | -0.32968 NA | NA             |             |
| 219.7873 | 187.6531 | 204.3512 | -0.02625    | 0.767300341    | 0.966975973 |
| 1086.428 | 1077.612 | 851.9873 | 0.265523    | 0.420515039    | 0.268588059 |
| 0        | 0        | 0        | #DIV/0! NA  | NA             |             |
| 30.3771  | 13.00566 | 15.71932 | 0.093883    | 0.152084817 NA |             |
| 188.5167 | 182.0792 | 137.2821 | 0.125659    | 0.53128891     | 0.779599442 |
| 0        | 0        | 0        | #DIV/0! NA  | NA             |             |
| 125.9756 | 72.46011 | 106.8914 | 0.422729    | 0.164920979    | 0.357079822 |
| 1.786889 | 3.715903 | 1.047955 | -1.90925    | 0.938838346 NA |             |
| 3397.769 | 3139.009 | 3178.447 | 0.004832    | 0.000656764    | 0.988943755 |
| 671.8701 | 611.2661 | 741.9521 | 0.047384    | 0.967813477    | 0.855770814 |
| 458.3369 | 467.2748 | 624.5811 | -0.41161    | 0.826883467    | 0.066899278 |
| 29.48366 | 46.44879 | 40.87024 | -0.25376    | 0.919200531 NA |             |
| 79.51654 | 46.44879 | 57.63752 | 0.150658    | 0.910682739    | 0.806564543 |
| 1019.42  | 1078.541 | 1089.873 | -0.07839    | 0.813154117    | 0.75448001  |
| 10.72133 | 0.928976 | 7.335684 | -0.85557    | 0.875830579 NA |             |
| 346.6564 | 445.9084 | 490.4429 | 0.464603    | 0.425097125    | 0.038101932 |

|          |          |          |             |                |             |
|----------|----------|----------|-------------|----------------|-------------|
| 3597.9   | 3639.727 | 3410.045 | 0.087589    | 0.949259474    | 0.563375937 |
| 29.48366 | 16.72156 | 26.19887 | 1.036314    | 0.810961861 NA |             |
| 284.1153 | 249.8945 | 293.4274 | -0.25092    | 0.095644436    | 0.244704905 |
| 898.8049 | 1018.157 | 880.2821 | -0.16561    | 0.51970267     | 0.40615036  |
| 48.24599 | 26.01132 | 48.20593 | 0.111042    | 0.02107346     | 0.881988452 |
| 963.1329 | 812.8538 | 823.6925 | 0.385266    | 0.55438266     | 0.096729284 |
| 1142.715 | 981.9274 | 796.4457 | 0.157059    | 0.985859213    | 0.56984254  |
| 199.2381 | 158.8549 | 232.646  | -0.19552    | 0.813154117    | 0.566141749 |
| 691.5259 | 634.4904 | 648.6841 | 0.134479    | 0.079089299    | 0.477547118 |
| 5151.6   | 5277.511 | 5518.53  | 0.098786    | 0.136084466    | 0.397066014 |
| 452.9762 | 405.9624 | 433.8533 | 0.099885    | 0.649302498    | 0.736452263 |
| 713.862  | 731.1039 | 651.8279 | 0.094348    | 0.050113237    | 0.711465473 |
| 711.1816 | 648.4251 | 599.4302 | 0.355577    | 0.695398138    | 0.060227128 |
| 595.9273 | 609.4081 | 621.4373 | 0.050117    | 0.337335124    | 0.832306222 |
| 5894.052 | 5718.775 | 6151.495 | -0.10032    | 0.758716249    | 0.59488868  |
| 537.8534 | 587.1127 | 500.9224 | 0.348345    | 0.310443697    | 0.193779401 |
| 1073.027 | 1132.421 | 1238.683 | 0.025513    | 0.931326642    | 0.919915102 |
| 168.861  | 162.5708 | 150.9055 | -0.04849    | 0.106548765    | 0.914120833 |
| 620.9438 | 642.8512 | 537.6009 | -0.03088    | 0.967813477    | 0.914553818 |
| 1446.486 | 1566.253 | 1484.952 | -0.05706    | 0.759261525    | 0.797980755 |
| 752.2801 | 726.459  | 658.1157 | 0.329357    | 0.29215357     | 0.178507885 |
| 974.7477 | 923.4019 | 833.1241 | 0.208446    | 0.104651539    | 0.395957024 |
| 1897.676 | 1960.139 | 1998.45  | -0.03176    | 0.550503835    | 0.907473183 |
| 849.6655 | 816.5697 | 886.5698 | 0.24324     | 0.410827034    | 0.178822023 |
| 0.893444 | 0        | 1.047955 | #DIV/0! NA  | NA             |             |
| 310.0252 | 232.2439 | 256.7489 | 0.137701    | 0.914747104    | 0.681152522 |
| 3975.827 | 3742.843 | 4105.887 | 0.014704    | 0.901380807    | 0.93327699  |
| 584.3125 | 743.1806 | 608.8618 | 0.032103    | 0.773823303    | 0.91372954  |
| 645.0668 | 614.053  | 766.055  | -0.34866    | 0.465047544    | 0.078157207 |
| 2854.554 | 2604.848 | 2450.119 | 0.192664    | 0.235669657    | 0.241819205 |
| 7924.851 | 8018.919 | 7824.031 | 0.293983    | 0.052564266    | 0.000300707 |
| 347.5498 | 307.491  | 291.3315 | -0.03482    | 0.812875146    | 0.919915102 |
| 7811.383 | 7383.499 | 8411.934 | 0.273276    | 0.98843748     | 0.101367547 |
| 1242.781 | 1202.095 | 1039.571 | 0.139813    | 0.02630298     | 0.596309029 |
| 2329.209 | 2311.292 | 2531.859 | 0.01413     | 0.572669463    | 0.952666818 |
| 1940.561 | 1938.772 | 1703.975 | 0.17386     | 0.155062297    | 0.324099572 |
| 349.3367 | 392.9567 | 386.6954 | -0.07723    | 0.768800795    | 0.791888862 |
| 102.7461 | 135.6305 | 116.323  | 0.292632    | 0.690152662    | 0.558104763 |
| 692.4193 | 634.4904 | 613.0536 | 0.014016    | 0.897898013    | 0.946922147 |
| 1255.289 | 959.632  | 935.8237 | 0.138079    | 0.504924333    | 0.575540189 |
| 8284.909 | 8182.419 | 8944.295 | -0.22449    | 0.552597953    | 0.039208875 |
| 2989.464 | 2668.018 | 3006.583 | -0.09409    | 0.225501117    | 0.594065295 |
| 15.18855 | 6.50283  | 12.57546 | -0.79194    | 0.485973657 NA |             |
| 5336.543 | 5519.045 | 6189.222 | -0.09068    | 0.249815953    | 0.596309029 |
| 192.0905 | 137.4884 | 266.1805 | -0.44643    | 0.961125122    | 0.207300547 |
| 829.1163 | 805.422  | 747.1918 | 0.315714    | 0.18468856     | 0.133980325 |
| 509.2632 | 459.843  | 390.8872 | 0.069661    | 0.755224646    | 0.835596295 |
| 24480.37 | 25001.52 | 25946.32 | -0.36451    | 0.792868376    | 0.010243246 |
| 11.61478 | 6.50283  | 8.383639 | 0.270426    | 0.826883467 NA |             |
| 277.8612 | 337.2182 | 295.5233 | -0.2703     | 0.673772903    | 0.280613898 |
| 2968.915 | 2655.942 | 2532.907 | 0.091321    | 0.054776927    | 0.741187433 |
| 11.61478 | 15.79259 | 14.67137 | -0.88905    | 0.578452627 NA |             |
| 0        | 1.857952 | 0        | -1.50354 NA | NA             |             |
| 130.4429 | 171.8605 | 153.0014 | 0.110345    | 0.268149097    | 0.791888862 |

|          |          |          |          |             |             |
|----------|----------|----------|----------|-------------|-------------|
| 10524.77 | 10990.71 | 12905.56 | 0.29051  | 0.917013507 | 0.116048789 |
| 138.4839 | 118.9089 | 111.0832 | -0.21391 | 0.609539912 | 0.579845143 |
| 41.09844 | 31.58518 | 44.01411 | 0.643287 | 0.562841483 | 0.303824089 |
| 1879.807 | 1913.69  | 1881.079 | -0.14883 | 0.034945647 | 0.343544446 |
| 398.4761 | 325.1415 | 420.2299 | 0.497087 | 0.092640355 | 0.060227128 |
| 321.6399 | 287.9825 | 297.6192 | 0.115475 | 0.944990108 | 0.721329001 |
| 487.8206 | 524.8713 | 596.2863 | 0.037433 | 0.46017679  | 0.884584155 |
| 250.1644 | 220.1673 | 207.4951 | 0.108043 | 0.972453208 | 0.739592868 |
| 586.0994 | 641.9223 | 608.8618 | 0.366492 | 0.707092679 | 0.024833343 |
| 7.147554 | 0.928976 | 8.383639 | 0.112457 | 0.79543317  | NA          |
| 96.49198 | 106.8322 | 100.6037 | -0.24842 | 0.27470085  | 0.509553026 |
| 174.2216 | 202.5167 | 190.7278 | 0.190609 | 0.2795135   | 0.602240104 |
| 210.8528 | 209.0195 | 247.3174 | -0.15155 | 0.856763291 | 0.708596546 |
| 420.8122 | 514.6526 | 515.5938 | 0.009492 | 0.732140966 | 0.984451848 |
| 906.8459 | 883.4559 | 863.5148 | -0.16097 | 0.754651689 | 0.481380095 |
| 0.893444 | 1.857952 | 1.047955 | -1.94685 | NA          | NA          |
| 27.69677 | 28.79825 | 32.4866  | 0.470302 | 0.482847539 | NA          |
| 243.9103 | 258.2553 | 250.4612 | 0.312389 | 0.936346196 | 0.17898966  |
| 4379.664 | 4191.539 | 4487.343 | -0.07656 | 0.666493976 | 0.535992604 |
| 0        | 0        | 0        | #DIV/0!  | NA          | NA          |
| 16.97544 | 24.15337 | 19.91114 | -0.80282 | 0.614621507 | NA          |
| 237.6562 | 227.5991 | 216.9267 | 0.223088 | 0.546270318 | 0.370883338 |
| 1407.175 | 1342.37  | 1359.197 | -0.06609 | 0.990064993 | 0.778199039 |
| 1.786889 | 0        | 2.09591  | #DIV/0!  | NA          | NA          |
| 1.786889 | 0        | 2.09591  | #DIV/0!  | NA          | NA          |
| 2051.348 | 2142.218 | 2167.171 | -0.07891 | 0.701216566 | 0.578074656 |
| 301.0907 | 278.6927 | 259.8928 | -0.29397 | 0.000661553 | 0.162162087 |
| 0        | 0        | 0        | #NUM!    | NA          | NA          |
| 875.5754 | 931.7627 | 1028.044 | -0.0279  | 0.897766774 | 0.908442874 |
| 4244.754 | 4238.916 | 4156.189 | 0.07185  | 0.779325825 | 0.533639004 |
| 3261.965 | 2903.049 | 2994.007 | 0.071762 | 0.045192099 | 0.756407952 |
| 478.8861 | 536.019  | 586.8547 | -0.30217 | 0.518108649 | 0.11250302  |
| 550.3617 | 537.877  | 477.8674 | -0.12674 | 0.962011634 | 0.545985077 |
| 896.1246 | 882.527  | 1129.695 | 0.063186 | 0.986203512 | 0.798013277 |
| 1031.035 | 1043.24  | 1134.935 | 0.132377 | 0.814880408 | 0.536590083 |
| 289.4759 | 290.7694 | 324.866  | -0.6662  | 0.681216827 | 0.000370485 |
| 5.360666 | 2.786927 | 4.19182  | 0.752602 | NA          | NA          |
| 975.6411 | 1047.885 | 910.6728 | 0.071607 | 0.906767387 | 0.686859684 |
| 0        | 3.715903 | 0        | #DIV/0!  | NA          | NA          |
| 915.7804 | 950.3422 | 1141.223 | 0.049732 | 0.710373411 | 0.835596295 |
| 284.1153 | 315.8518 | 381.4556 | -0.20724 | 0.828016939 | 0.536664638 |
| 674.5504 | 614.982  | 617.2454 | 0.00283  | 0.614563272 | 0.996992829 |
| 6029.855 | 6285.45  | 6360.038 | -0.2912  | 0.948896953 | 0.042689756 |
| 234.9758 | 303.7751 | 273.5162 | 0.040111 | 0.617661583 | 0.905897923 |
| 6684.75  | 6416.436 | 6191.318 | -0.01582 | 0.088704246 | 0.924154584 |
| 800.5261 | 831.4333 | 692.6982 | 0.189419 | 0.918350023 | 0.341785585 |
| 185.8364 | 247.1076 | 207.4951 | 0.487929 | 0.537944371 | 0.089456731 |
| 0        | 0        | 0        | #DIV/0!  | NA          | NA          |
| 5797.56  | 6160.967 | 5342.474 | 0.042848 | 0.017930836 | 0.826228143 |
| 812.1408 | 827.7174 | 798.5416 | 0.18447  | 0.03968658  | 0.359566588 |
| 262.6726 | 308.42   | 342.6813 | -0.46945 | 0.821754986 | 0.102175745 |
| 4233.139 | 4399.629 | 4375.212 | 0.01019  | 0.263437821 | 0.952588397 |
| 863.0672 | 759.9022 | 813.213  | 0.088252 | 0.826883467 | 0.690294956 |
| 846.0917 | 962.4189 | 943.1594 | -0.04383 | 0.902367847 | 0.864252513 |

|          |          |          |             |                |             |
|----------|----------|----------|-------------|----------------|-------------|
| 8288.482 | 8517.779 | 10173.55 | -0.57704    | 0.750700436    | 3.13602E-05 |
| 1038.182 | 1130.564 | 956.7828 | -0.10856    | 0.788592496    | 0.578237014 |
| 3.573777 | 1.857952 | 2.09591  | 0.193012 NA | NA             |             |
| 221.5742 | 228.528  | 291.3315 | 0.17458     | 0.171568235    | 0.656215943 |
| 8180.376 | 7830.337 | 8433.941 | -0.24682    | 0.980754424    | 0.062514752 |
| 424.386  | 413.3942 | 373.0719 | 0.027425    | 0.198059489    | 0.931542231 |
| 2616.005 | 2865.89  | 2509.852 | 0.12795     | 0.585762809    | 0.350286088 |
| 5923.535 | 5832.11  | 5808.814 | -0.06402    | 0.002758864    | 0.566742383 |
| 9189.968 | 8864.287 | 8030.478 | 0.129179    | 0.004218142    | 0.494493869 |
| 343.976  | 479.3515 | 459.0042 | -0.33988    | 0.210289554    | 0.18366757  |
| 93.81165 | 66.88625 | 76.50071 | 0.204357    | 0.412665866    | 0.730853476 |
| 5166.788 | 4787.012 | 4925.388 | 0.061651    | 0.857370872    | 0.680262772 |
| 3014.481 | 3029.39  | 3446.724 | -0.79482    | 0.5124279      | 2.89763E-07 |
| 595.0339 | 718.0983 | 701.0818 | 0.150762    | 0.957697061    | 0.505302546 |
| 33.95088 | 16.72156 | 27.24683 | 0.47891     | 0.466642335 NA |             |
| 4236.713 | 4259.354 | 4354.253 | -0.04162    | 0.795376015    | 0.836904079 |
| 87.55754 | 88.2527  | 96.41185 | 0.183004    | 0.879019047    | 0.709925559 |
| 622.7306 | 542.5218 | 687.4584 | -0.118      | 0.009557355    | 0.753881265 |
| 1067.666 | 1131.492 | 1085.681 | 0.332839    | 0.431874361    | 0.020934062 |
| 2346.185 | 2277.849 | 2558.058 | -0.10634    | 0.953403647    | 0.539224916 |
| 417.2385 | 423.6129 | 428.6136 | -0.02972    | 0.743600406    | 0.924895748 |
| 324.3203 | 287.0535 | 290.2835 | 0.075257    | 0.734144448    | 0.84358525  |
| 18.76233 | 17.65054 | 29.34274 | 0.58148     | 0.918350023 NA |             |
| 1.786889 | 17.65054 | 4.19182  | -0.61099    | 0.471685453 NA |             |
| 1208.83  | 1133.35  | 1230.299 | -0.10198    | 0.61781651     | 0.607746892 |
| 938.1165 | 947.5553 | 936.8717 | -0.25695    | 0.972861407    | 0.05827215  |
| 753.1735 | 855.5867 | 926.3921 | -0.22852    | 0.408488796    | 0.283703282 |
| 8.934443 | 1.857952 | 8.383639 | 0.674627 NA | NA             |             |
| 0        | 3.715903 | 2.09591  | -0.13372 NA | NA             |             |
| 30.3771  | 26.9403  | 23.05501 | -0.29628    | 0.284504666 NA |             |
| 2019.184 | 1998.227 | 1711.31  | 0.193212    | 0.80496489     | 0.267586812 |
| 1689.503 | 1572.756 | 1501.719 | 0.132445    | 0.717053318    | 0.595440724 |
| 1123.953 | 1190.018 | 1025.948 | 0.165465    | 0.177527106    | 0.310947968 |
| 848.772  | 874.1662 | 716.8011 | 0.053985    | 0.990604058    | 0.836257824 |
| 34413.69 | 33523.95 | 34225.16 | -0.27985    | 0.767024472    | 0.022140132 |
| 24.12299 | 37.15903 | 20.9591  | -0.43906    | 0.434285263 NA |             |
| 7180.612 | 7226.502 | 6780.268 | -0.10863    | 0.896393169    | 0.401260914 |
| 473.5255 | 455.1981 | 636.1086 | -0.16747    | 0.243530103    | 0.553711578 |
| 198.3446 | 155.139  | 140.426  | 0.006018    | 0.945439891    | 0.994756086 |
| 303.771  | 270.3319 | 302.859  | -0.08225    | 0.031086718    | 0.784199388 |
| 1388.412 | 1242.97  | 1195.717 | 0.05193     | 0.02496009     | 0.826486725 |
| 1202.576 | 1115.7   | 1469.233 | 0.08196     | 0.35165001     | 0.797980755 |
| 20174.86 | 19506.63 | 21812.13 | -0.49236    | 0.83986426     | 0.002079329 |
| 1793.143 | 1687.02  | 1611.755 | 0.198355    | 0.614621507    | 0.241619328 |
| 628.0913 | 663.2887 | 616.1975 | 0.545483    | 0.058039065    | 0.001207474 |
| 0        | 0.928976 | 0        | -1.86025 NA | NA             |             |
| 3219.08  | 3151.086 | 3080.987 | 0.025096    | 0.222727039    | 0.883471187 |
| 279.6481 | 270.3319 | 339.5374 | 0.29071     | 0.488617455    | 0.328024792 |
| 0.893444 | 0        | 0        | -1.74916 NA | NA             |             |
| 990.8297 | 975.4245 | 885.5219 | 0.119649    | 0.890335462    | 0.602036712 |
| 364.5253 | 303.7751 | 331.1537 | 0.137818    | 0.577332911    | 0.723437511 |
| 708.5013 | 777.5527 | 797.4937 | 0.097066    | 0.951118826    | 0.608228413 |
| 22315.56 | 21516.94 | 23629.29 | -0.3641     | 0.657109304    | 0.00526791  |
| 380.6073 | 400.3886 | 352.1128 | 0.133695    | 0.185762147    | 0.684131921 |

|          |          |          |             |              |             |
|----------|----------|----------|-------------|--------------|-------------|
| 94.70509 | 85.46577 | 54.49365 | -0.03937    | 0.525181455  | 0.946922147 |
| 4.467221 | 8.360782 | 0        | -0.03796 NA | NA           |             |
| 1192.748 | 1186.302 | 1197.812 | -0.11838    | 0.072365168  | 0.539224916 |
| 317.1727 | 336.2892 | 373.0719 | -0.004      | 0.465047544  | 0.999234423 |
| 1021.207 | 1036.737 | 1103.497 | -0.17045    | 0.428811885  | 0.303824089 |
| 981.0018 | 928.9758 | 767.103  | 0.369097    | 0.068521623  | 0.054239832 |
| 726.3702 | 731.1039 | 709.4655 | 0.16294     | 0.356320255  | 0.409178926 |
| 314.4924 | 428.2578 | 319.6262 | 0.292217    | 0.924284267  | 0.266775275 |
| 5953.913 | 5838.613 | 6157.783 | -0.14498    | 0.504339531  | 0.361564535 |
| 2984.104 | 2929.061 | 2537.099 | 0.12273     | 0.07224611   | 0.604835014 |
| 2985.891 | 2681.024 | 2470.03  | 0.34112     | 0.441155859  | 0.389799953 |
| 12773.57 | 12866.31 | 12351.2  | -0.12414    | 0.795376015  | 0.40615036  |
| 1595.691 | 1581.117 | 1326.711 | 0.073968    | 0.465814049  | 0.798292995 |
| 29061.06 | 28556.71 | 30939.82 | -0.48378    | 0.985859213  | 0.000831448 |
| 5884.224 | 5685.332 | 5783.663 | -0.34262    | 1.23607E-14  | 0.000181416 |
| 129.5494 | 114.264  | 149.8575 | 0.055371    | 0.732140966  | 0.914120833 |
| 712.9685 | 635.4194 | 613.0536 | 0.338552    | 0.455280748  | 0.237811367 |
| 6406.889 | 6291.953 | 6407.196 | -0.19098    | 0.006535586  | 0.016524168 |
| 500.3288 | 705.0926 | 545.9845 | -0.02557    | 0.460515819  | 0.942267738 |
| 1085.535 | 872.3082 | 990.3174 | 0.303399    | 0.507065266  | 0.10424789  |
| 380.6073 | 388.3119 | 355.2567 | -0.04693    | 0.31587804   | 0.864252513 |
| 1007.805 | 888.1008 | 944.2074 | 0.275396    | 0.049321046  | 0.070866904 |
| 3934.729 | 3678.744 | 3622.78  | 0.032826    | 0.69974305   | 0.852816937 |
| 229.6152 | 246.1786 | 222.1664 | 0.094089    | 0.759261525  | 0.764338813 |
| 55.39354 | 69.67318 | 86.98026 | -0.37832    | 0.354108154  | 0.398613087 |
| 1841.389 | 1846.804 | 1541.542 | 0.125504    | 0.146940246  | 0.613915007 |
| 3054.686 | 2874.251 | 2997.151 | -0.04163    | 0.852231703  | 0.79799583  |
| 1321.404 | 1310.785 | 1262.786 | 0.416943    | 0.652135039  | 0.361323147 |
| 360.058  | 396.6727 | 395.079  | -0.11074    | 0.766887678  | 0.690294956 |
| 995.2969 | 1048.814 | 1089.873 | -0.28348    | 0.161758304  | 0.028626623 |
| 5232.903 | 5169.75  | 5393.824 | -0.15728    | 0.872654096  | 0.300201673 |
| 1584.077 | 1519.804 | 1643.193 | -0.14434    | 0.990064993  | 0.390556389 |
| 388.6483 | 415.2522 | 463.1961 | -0.25053    | 0.962011634  | 0.315076194 |
| 835.3704 | 863.9475 | 880.2821 | 0.026819    | 0.003450987  | 0.91372954  |
| 1058.731 | 1133.35  | 1239.731 | -0.07229    | 0.826883467  | 0.721329001 |
| 357.3777 | 379.0221 | 377.2638 | 0.069244    | 0.97594944   | 0.838085776 |
| 7.147554 | 11.14771 | 19.91114 | 3.026206    | 0.2795135 NA |             |
| 1749.364 | 1612.702 | 1423.123 | 0.132061    | 0.382461453  | 0.708596546 |
| 551.2551 | 603.8342 | 559.6079 | 0.06013     | 0.660321043  | 0.826008003 |
| 415.4516 | 481.2094 | 684.3145 | -0.74445    | 0.951538779  | 0.000330467 |
| 0        | 4.644879 | 1.047955 | -0.24481 NA | NA           |             |
| 2128.184 | 2163.585 | 2322.268 | -0.28225    | 0.014948404  | 0.026340179 |
| 1465.249 | 1413.901 | 1412.643 | 0.044511    | 0.186095147  | 0.782219628 |
| 4517.254 | 4604.004 | 4498.87  | -0.0602     | 0.183199252  | 0.693887308 |
| 426.1729 | 407.8204 | 381.4556 | -0.03897    | 0.828016939  | 0.893102595 |
| 247.4841 | 187.6531 | 187.5839 | -0.17558    | 0.363948776  | 0.620413666 |
| 1039.076 | 1028.376 | 909.6248 | 0.23067     | 0.44898062   | 0.316203475 |
| 2116.569 | 2067.9   | 2194.418 | -0.0485     | 0.515985444  | 0.791888862 |
| 545.8944 | 493.2861 | 537.6009 | 0.009912    | 0.464099155  | 0.965364339 |
| 2651.743 | 2428.343 | 2420.776 | 0.274071    | 0.899176451  | 0.084617521 |
| 1178.453 | 1324.719 | 1132.839 | 0.345674    | 0.579526371  | 0.102958379 |
| 188.5167 | 203.4457 | 197.0155 | 0.134843    | 0.962433805  | 0.73912962  |
| 386.8614 | 428.2578 | 389.8392 | 0.099619    | 0.25875662   | 0.691804481 |
| 2138.906 | 2318.724 | 2314.932 | -0.0028     | 0.152933305  | 0.990142758 |

|          |          |          |             |             |             |
|----------|----------|----------|-------------|-------------|-------------|
| 1891.421 | 1937.843 | 2025.697 | 0.022652    | 0.771558038 | 0.904467867 |
| 0        | 0        | 0        | #DIV/0! NA  | NA          |             |
| 2036.159 | 2114.349 | 2599.976 | -0.14328    | 0.753964428 | 0.471231263 |
| 2318.488 | 2249.979 | 2066.567 | 0.00899     | 0.392876266 | 0.962321489 |
| 3767.654 | 3570.054 | 3368.127 | 0.15019     | 0.856763291 | 0.469528865 |
| 1156.117 | 1148.214 | 1038.523 | 0.172573    | 0.230347011 | 0.351487828 |
| 3097.571 | 2953.214 | 3265.427 | -0.13599    | 0.740595411 | 0.370304803 |
| 556.6158 | 591.7576 | 640.3004 | -0.30503    | 0.234941511 | 0.063099827 |
| 2337.25  | 2286.209 | 2065.519 | -0.01988    | 0.941323092 | 0.948371294 |
| 327.0006 | 421.755  | 387.7433 | 0.092992    | 0.735300868 | 0.762489303 |
| 146.5249 | 139.3464 | 119.4669 | 0.087328    | 0.901380807 | 0.840777068 |
| 259.0988 | 284.2666 | 299.7151 | 0.11097     | 0.732140966 | 0.767228242 |
| 0        | 0        | 0        | #NUM! NA    | NA          |             |
| 324.3203 | 334.4313 | 463.1961 | -0.02223    | 0.442771688 | 0.956290296 |
| 3179.768 | 3074.91  | 2883.972 | -0.00813    | 0.025591463 | 0.972140885 |
| 936.3296 | 1042.311 | 979.8378 | -0.10586    | 0.295581805 | 0.596309029 |
| 287.6891 | 234.1019 | 225.3103 | 0.244934    | 0.254673637 | 0.390556389 |
| 1404.494 | 1411.114 | 1350.814 | 0.157882    | 0.012122297 | 0.497448576 |
| 208.1725 | 258.2553 | 241.0296 | -0.03239    | 0.354108154 | 0.952588397 |
| 1093.576 | 978.2115 | 1111.88  | 0.138253    | 0.979755434 | 0.394829397 |
| 379.7138 | 393.8857 | 444.3329 | -0.18147    | 0.876595319 | 0.505302546 |
| 19808.55 | 18724.44 | 18357.03 | -0.37731    | 0.905623996 | 0.010218325 |
| 528.919  | 570.3911 | 410.7983 | 0.08239     | 0.399767691 | 0.82871401  |
| 452.0828 | 491.4282 | 498.8265 | 0.139917    | 0.060961265 | 0.648218962 |
| 429.7467 | 468.2038 | 399.2708 | 0.271176    | 0.189991943 | 0.205836834 |
| 746.026  | 649.3541 | 779.6784 | 0.163471    | 0.69974305  | 0.426846696 |
| 3701.54  | 3626.721 | 3555.711 | 0.009242    | 0.910682739 | 0.952588397 |
| 1894.102 | 1947.133 | 1916.71  | -0.09463    | 0.880033865 | 0.517983853 |
| 766.5752 | 782.1976 | 775.4866 | 0.119882    | 0.369165716 | 0.710878442 |
| 1004.231 | 903.8934 | 957.8308 | -0.22418    | 0.597867308 | 0.147203406 |
| 9756.411 | 9783.973 | 9807.81  | -0.08595    | 0.37757303  | 0.421538281 |
| 279.6481 | 273.1189 | 268.2765 | 0.329502    | 0.900383237 | 0.263613142 |
| 455.6566 | 439.4055 | 404.5106 | 0.134304    | 0.617323493 | 0.590570691 |
| 377.9269 | 468.2038 | 444.3329 | -0.07019    | 0.233378357 | 0.818645356 |
| 2303.299 | 2235.116 | 2129.444 | 0.072781    | 0.453550494 | 0.744172227 |
| 0        | 2.786927 | 2.09591  | -1.10954 NA | NA          |             |
| 0        | 1.857952 | 8.383639 | #DIV/0! NA  | NA          |             |
| 972.9608 | 1011.655 | 996.6051 | 0.023641    | 0.234629688 | 0.921848549 |
| 705.821  | 824.9305 | 746.1439 | 0.083154    | 0.97820156  | 0.678425078 |
| 1034.608 | 983.7853 | 856.1791 | -0.4478     | 0.0444701   | 0.001688143 |
| 229.6152 | 197.8718 | 228.4542 | -0.04813    | 0.310443697 | 0.912679298 |
| 2770.571 | 2816.655 | 2417.632 | 0.051861    | 0.758804926 | 0.763536617 |
| 2008.463 | 2124.568 | 2224.808 | -0.04069    | 0.940969382 | 0.844024501 |
| 1648.405 | 1650.79  | 1764.756 | -0.12837    | 0.032552764 | 0.36518668  |
| 1165.051 | 1315.43  | 1187.333 | -0.07465    | 0.869438043 | 0.729565723 |
| 1871.766 | 1790.136 | 1676.728 | -0.05205    | 0.565330117 | 0.818645356 |
| 2393.537 | 2329.871 | 2633.511 | 0.131681    | 0.454285123 | 0.470568982 |
| 723.6898 | 802.6351 | 798.5416 | -0.00653    | 0.899176451 | 0.986413752 |
| 988.1493 | 991.2171 | 1025.948 | 0.083032    | 0.825200136 | 0.672998339 |
| 0        | 0        | 1.047955 | -2.94368 NA | NA          |             |
| 315.3858 | 331.6443 | 344.7772 | -0.07893    | 0.005435534 | 0.780344055 |
| 381.5007 | 431.0448 | 553.3202 | 0.036805    | 0.649714874 | 0.919467952 |
| 0        | 0.928976 | 4.19182  | 1.959111 NA | NA          |             |
| 748.7063 | 840.7231 | 772.3428 | -0.28493    | 0.187714147 | 0.042867461 |

|          |          |          |             |                |             |
|----------|----------|----------|-------------|----------------|-------------|
| 518.1977 | 562.9593 | 477.8674 | 0.240359    | 0.831470267    | 0.225664658 |
| 4.467221 | 0        | 2.09591  | -0.51515 NA | NA             |             |
| 290.3694 | 373.4483 | 330.1058 | -0.13993    | 0.173427762    | 0.684119849 |
| 2.680333 | 1.857952 | 3.143865 | -1.12057    | 0.38441957 NA  |             |
| 616.4765 | 498.86   | 501.9704 | 0.425527    | 0.544702272    | 0.193397574 |
| 92.9182  | 114.264  | 118.4189 | -0.09676    | 0.572219693    | 0.841259647 |
| 3455.842 | 3282.071 | 3427.86  | 0.020143    | 0.20047115     | 0.903329758 |
| 20858.35 | 21429.61 | 20953.86 | -0.4496     | 0.98409529     | 0.003590571 |
| 2561.505 | 2350.309 | 2241.576 | 0.015257    | 0.74152952     | 0.938924382 |
| 910.4197 | 1039.524 | 992.4133 | -0.09356    | 0.974826797    | 0.675143077 |
| 1165.051 | 1013.513 | 859.323  | 0.186017    | 0.732140966    | 0.422560599 |
| 567.3371 | 536.948  | 491.4908 | 0.333692    | 0.364476852    | 0.114325948 |
| 1.786889 | 0.928976 | 1.047955 | 1.51494 NA  | NA             |             |
| 1458.994 | 1270.839 | 1321.471 | 0.13083     | 0.168661373    | 0.558104763 |
| 447.6156 | 494.2151 | 501.9704 | 0.130904    | 0.7406592      | 0.58759663  |
| 1428.617 | 1433.41  | 1271.169 | 0.245678    | 0.488752278    | 0.307823418 |
| 1166.838 | 1140.782 | 1480.76  | -0.31385    | 0.313396084    | 0.116775899 |
| 0        | 0        | 2.09591  | #DIV/0! NA  | NA             |             |
| 5708.215 | 5637.954 | 5340.378 | -0.04215    | 0.025591463    | 0.754367859 |
| 250.1644 | 231.315  | 286.0917 | -0.21523    | 0.15696576     | 0.422252477 |
| 884.5098 | 814.7117 | 759.7673 | 0.18656     | 0.365690431    | 0.416620055 |
| 821.9687 | 701.3767 | 697.938  | 0.046499    | 0.145617043    | 0.875604624 |
| 378.8204 | 451.4822 | 361.5444 | -0.00159    | 0.936346196    | 0.996992829 |
| 3271.793 | 3324.804 | 2927.986 | -0.15814    | 0.861602547    | 0.310467353 |
| 3.573777 | 8.360782 | 2.09591  | 0.223886 NA | NA             |             |
| 8.040998 | 8.360782 | 13.62341 | -0.6785     | 0.892614393 NA |             |
| 1890.528 | 1652.648 | 1730.174 | 0.161783    | 0.543812671    | 0.371885384 |
| 0        | 0        | 0        | #DIV/0! NA  | NA             |             |
| 900.5918 | 954.9871 | 885.5219 | 0.271806    | 0.826883467    | 0.328024792 |
| 1859.258 | 1895.111 | 1743.797 | -0.2232     | 0.603004299    | 0.076637307 |
| 839.8376 | 776.6237 | 766.055  | 0.318444    | 0.344730624    | 0.057538814 |
| 2272.029 | 2201.673 | 2146.212 | -0.00798    | 0.707368241    | 0.976485768 |
| 1934.307 | 2061.397 | 2243.671 | -0.12398    | 0.746491819    | 0.565559013 |
| 927.3951 | 988.4302 | 781.7744 | 0.036369    | 0.949687139    | 0.875772383 |
| 7.147554 | 2.786927 | 3.143865 | -1.32071    | 0.478308661 NA |             |
| 5391.936 | 5334.179 | 4634.057 | 0.042449    | 0.077746639    | 0.852939392 |
| 6173.7   | 6468.458 | 7633.303 | -0.72662    | 0.938838346    | 4.23024E-07 |
| 4992.567 | 4769.362 | 4914.908 | 0.21007     | 0.914796531    | 0.030371149 |
| 28322.18 | 27223.63 | 26886.33 | -0.31585    | 0.735300868    | 0.010917743 |
| 871.1082 | 778.4817 | 694.7941 | 0.159273    | 0.462276826    | 0.422560599 |
| 1065.879 | 991.2171 | 989.2694 | 0.041013    | 0.207773529    | 0.838059844 |
| 0        | 0        | 0        | #DIV/0! NA  | NA             |             |
| 1481.331 | 1517.946 | 1297.368 | 0.164893    | 0.285283589    | 0.373144367 |
| 1072.133 | 1067.393 | 872.9464 | 0.364491    | 0.233378357    | 0.081762395 |
| 1681.462 | 1727.895 | 1820.298 | 0.036897    | 0.682134131    | 0.828690234 |
| 486.9271 | 432.9027 | 465.292  | -0.45954    | 0.854862911    | 0.011489515 |
| 5.360666 | 11.14771 | 7.335684 | 2.593338 NA | NA             |             |
| 501.2222 | 565.7462 | 642.3963 | -0.02586    | 0.909289996    | 0.93327699  |
| 232.2955 | 218.3093 | 194.9196 | -0.0102     | 0.170982117    | 0.991297078 |
| 219.7873 | 260.1132 | 210.6389 | 0.161737    | 0.73478662     | 0.647117771 |
| 2415.873 | 2396.757 | 2255.199 | 0.027244    | 0.259725973    | 0.912679298 |
| 4177.745 | 4061.482 | 3434.148 | -0.62345    | 1.48777E-07    | 4.43158E-06 |
| 850.5589 | 817.4987 | 848.8435 | 0.000841    | 0.997294627    | 0.990023409 |
| 737.985  | 784.0555 | 871.8985 | -0.13261    | 0.451912698    | 0.515558505 |



|          |          |          |             |                |             |
|----------|----------|----------|-------------|----------------|-------------|
| 1004.231 | 1065.535 | 789.11   | 0.220747    | 0.331795127    | 0.365253762 |
| 13612.52 | 13221.18 | 14506.84 | -0.13364    | 0.988049891    | 0.376402197 |
| 3942.77  | 3948.147 | 4406.65  | -0.25672    | 0.375474938    | 0.081215714 |
| 833.5835 | 796.1322 | 731.4725 | 0.122154    | 0.996781128    | 0.56192082  |
| 443.1484 | 412.4652 | 400.3188 | 0.155485    | 0.740887036    | 0.552800466 |
| 2129.971 | 2275.991 | 2217.473 | -0.18374    | 0.69974305     | 0.163200347 |
| 268.0333 | 360.4426 | 285.0437 | -0.16609    | 0.792868376    | 0.578237014 |
| 3750.679 | 3730.767 | 3895.248 | 0.006581    | 0.018706432    | 0.972140885 |
| 2.680333 | 1.857952 | 0        | #DIV/0! NA  | NA             |             |
| 0        | 2.786927 | 0        | -1.10793 NA | NA             |             |
| 564.6568 | 588.0417 | 565.8956 | 0.020597    | 0.759261525    | 0.929442227 |
| 340.4023 | 324.2125 | 366.7842 | 0.385685    | 0.853195053    | 0.118990473 |
| 189.4102 | 191.369  | 182.3442 | 0.136418    | 0.618648297    | 0.688746278 |
| 0        | 0        | 1.047955 | -0.68638 NA | NA             |             |
| 402.0499 | 390.1698 | 304.9549 | 0.178276    | 0.910682739    | 0.620471139 |
| 503.0091 | 471.9197 | 513.4979 | -0.02677    | 0.812875146    | 0.919654113 |
| 1050.69  | 1072.038 | 981.9337 | 0.132691    | 0.179898822    | 0.697184019 |
| 1103.404 | 1056.245 | 977.7419 | 0.223157    | 0.556307283    | 0.306279885 |
| 579.8453 | 566.6752 | 584.7588 | 0.048765    | 0.915659837    | 0.859505388 |
| 1032.822 | 844.439  | 893.9055 | 0.332994    | 0.09408214     | 0.117751922 |
| 348.4433 | 323.2836 | 352.1128 | 0.043181    | 0.134933146    | 0.885571199 |
| 353.8039 | 366.0165 | 280.8519 | 0.414026    | 0.638519612    | 0.32698614  |
| 11.61478 | 18.57952 | 20.9591  | -0.49481    | 0.927238755 NA |             |
| 66.11488 | 74.31806 | 64.9732  | -0.61822    | 0.899235412    | 0.129766751 |
| 1826.2   | 1737.185 | 1715.502 | 0.027489    | 0.812875146    | 0.884584155 |
| 1433.085 | 1401.824 | 1685.111 | -0.49772    | 0.04572454     | 7.52836E-05 |
| 3834.663 | 3676.886 | 4067.113 | 0.141186    | 0.485405854    | 0.2558776   |
| 4163.45  | 4453.51  | 4868.798 | -0.13822    | 0.012367726    | 0.403397484 |
| 29235.28 | 29101.09 | 27237.4  | -0.19281    | 0.662554511    | 0.196300439 |
| 1758.298 | 1595.051 | 1501.719 | -0.25792    | 0.068720229    | 0.068696986 |
| 2481.988 | 2743.265 | 2700.58  | -0.1825     | 0.173742426    | 0.302912952 |
| 0.893444 | 5.573855 | 1.047955 | #DIV/0! NA  | NA             |             |
| 16.97544 | 16.72156 | 26.19887 | -0.08879    | 0.962011634 NA |             |
| 1715.413 | 1685.162 | 1837.065 | 0.134699    | 0.052828239    | 0.569189198 |
| 20557.26 | 20709.66 | 20198.28 | -0.39205    | 0.878477491    | 0.007126765 |
| 248.3775 | 246.1786 | 239.9817 | 0.083175    | 0.053797631    | 0.81253834  |
| 868.4278 | 793.3453 | 837.316  | 0.342901    | 0.72089777     | 0.154958521 |
| 151.8855 | 161.6418 | 163.481  | 0.116799    | 0.1432612      | 0.812861677 |
| 3356.67  | 3324.804 | 3492.834 | -0.06957    | 0.002670611    | 0.65282506  |
| 1137.355 | 1051.601 | 1175.805 | -0.00622    | 0.928693659    | 0.989508176 |
| 717.4357 | 744.1096 | 664.4034 | 0.354464    | 0.83213076     | 0.131764306 |
| 1490.265 | 1370.239 | 1614.898 | -0.08417    | 0.939073649    | 0.736598036 |
| 472.632  | 444.0504 | 562.7518 | -0.03094    | 0.803184945    | 0.91372954  |
| 637.9192 | 666.0756 | 632.9648 | 0.070238    | 0.572336545    | 0.767705112 |
| 0        | 2.786927 | 0        | #DIV/0! NA  | NA             |             |
| 3860.573 | 3950.934 | 5061.622 | -0.32021    | 0.334672105    | 0.049072029 |
| 79833.71 | 79921.64 | 77896.58 | -0.24864    | 0.766843138    | 0.0410944   |
| 836.2638 | 859.3026 | 720.993  | 0.202301    | 0.102584855    | 0.3265611   |
| 1361.609 | 1385.103 | 1615.946 | 0.304944    | 0.757469981    | 0.145716826 |
| 485.1402 | 546.2377 | 529.2172 | -0.05829    | 0.963625684    | 0.813492611 |
| 595.0339 | 531.3741 | 609.9097 | -0.02554    | 0.49329978     | 0.939639228 |
| 3286.088 | 3167.807 | 2959.425 | 0.00409     | 0.000215183    | 0.983469507 |
| 2.680333 | 1.857952 | 2.09591  | 0.143316 NA | NA             |             |
| 1113.232 | 1165.865 | 981.9337 | 0.091887    | 0.042077294    | 0.685362267 |

|          |          |          |          |             |             |
|----------|----------|----------|----------|-------------|-------------|
| 1354.461 | 1297.779 | 1348.718 | -0.14723 | 0.375097568 | 0.359566588 |
| 3489.793 | 3206.824 | 3638.499 | -0.0179  | 0.000641579 | 0.931683541 |
| 5970.888 | 6168.399 | 6151.495 | 0.004661 | 0.189082264 | 0.97680656  |
| 5.360666 | 7.431806 | 4.19182  | 0.688872 | 0.485973657 | NA          |
| 968.4936 | 1075.754 | 813.213  | 0.21105  | 0.152569697 | 0.446297475 |
| 167.0741 | 178.3633 | 186.536  | 0.061077 | 0.254252351 | 0.912679298 |
| 952.4116 | 797.0612 | 752.4316 | -0.05676 | 0.69974305  | 0.850619089 |
| 1167.732 | 1072.967 | 1082.537 | 0.042947 | 0.310443697 | 0.81253834  |
| 891.6574 | 780.3396 | 1023.852 | 0.11592  | 0.577332911 | 0.669238482 |
| 287.6891 | 267.545  | 278.756  | 0.092246 | 0.886123912 | 0.773113821 |
| 470.8451 | 449.6243 | 569.0395 | 0.009982 | 0.683705537 | 0.980251134 |
| 232.2955 | 258.2553 | 264.0846 | 0.040399 | 0.940969382 | 0.931131803 |
| 234.0824 | 270.3319 | 189.6798 | 0.229587 | 0.962556121 | 0.511081603 |
| 2594.562 | 2630.859 | 2344.275 | 0.135987 | 0.211120083 | 0.305420728 |
| 6.25411  | 3.715903 | 3.143865 | -0.93864 | NA          | NA          |
| 7.147554 | 5.573855 | 4.19182  | -1.54224 | 0.857865109 | NA          |
| 69454.57 | 68540.76 | 68073.05 | -0.16614 | 0.701216566 | 0.167165088 |
| 40641.89 | 40538.64 | 38433.75 | -0.21205 | 0.826883467 | 0.069341932 |
| 17.86889 | 12.07668 | 15.71932 | 1.549978 | 0.821934951 | NA          |
| 234.0824 | 402.2465 | 294.4753 | -0.08921 | 0.756223951 | 0.835596295 |
| 316.2793 | 215.5224 | 244.1735 | 0.179798 | 0.783760899 | 0.713323797 |
| 1283.879 | 1378.6   | 1251.258 | -0.11375 | 0.999122571 | 0.465657685 |
| 950.6247 | 946.6263 | 937.9196 | 0.424105 | 0.027170262 | 0.00145335  |
| 1156.117 | 1247.614 | 1230.299 | -0.09114 | 0.92426981  | 0.607746892 |
| 9.827887 | 5.573855 | 14.67137 | 0.123339 | 0.613472884 | NA          |
| 677.2307 | 620.5558 | 765.0071 | -0.39594 | 0.968581517 | 0.110349167 |
| 1274.945 | 1312.643 | 1200.956 | 0.154571 | 0.021160717 | 0.333065318 |
| 616.4765 | 659.5728 | 570.0875 | 0.026077 | 0.249012381 | 0.918453677 |
| 1473.29  | 1399.037 | 1285.841 | 0.069957 | 0.440055258 | 0.695789063 |
| 0        | 0.928976 | 0        | -1.69289 | NA          | NA          |
| 1387.519 | 1243.899 | 1212.484 | 0.183349 | 0.925203985 | 0.434126424 |
| 1062.305 | 1074.825 | 886.5698 | 0.158323 | 0.948896953 | 0.377946785 |
| 2420.34  | 2631.788 | 2296.069 | 0.03976  | 0.35165001  | 0.864252513 |
| 1140.928 | 1136.137 | 1355.006 | -0.22303 | 0.117671029 | 0.152005617 |
| 620.0503 | 529.5162 | 472.6277 | 0.20388  | 0.840870655 | 0.394829397 |
| 3.573777 | 0.928976 | 1.047955 | #DIV/0!  | NA          | NA          |
| 1314.257 | 1356.305 | 1498.575 | 0.071607 | 0.324651337 | 0.712630985 |
| 7.147554 | 16.72156 | 9.431594 | 1.129031 | 0.973819598 | NA          |
| 4.467221 | 9.289758 | 8.383639 | -0.28791 | 0.996384969 | NA          |
| 973.8542 | 859.3026 | 775.4866 | 0.214802 | 0.03049807  | 0.359873864 |
| 565.5502 | 562.0303 | 494.6347 | 0.313231 | 0.296333484 | 0.090902558 |
| 2362.267 | 2269.488 | 2331.7   | 0.106112 | 0.364668012 | 0.567449963 |
| 841.6245 | 843.51   | 763.9591 | 0.098227 | 0.598960113 | 0.765789524 |
| 751.3866 | 807.2799 | 759.7673 | 0.053524 | 0.359347275 | 0.819004    |
| 1112.338 | 1220.674 | 1300.512 | -0.01787 | 0.001685017 | 0.936474207 |
| 610.2224 | 599.1894 | 691.6502 | -0.30689 | 0.837998472 | 0.043238479 |
| 2.680333 | 0        | 2.09591  | -0.8553  | NA          | NA          |
| 1054.264 | 980.9984 | 1055.291 | 0.042959 | 0.981076246 | 0.835181175 |
| 1703.798 | 1680.517 | 1377.013 | 0.28781  | 0.453640482 | 0.169935181 |
| 187.6233 | 183.0082 | 168.7207 | -0.34728 | 0.582750031 | 0.206277032 |
| 11.61478 | 9.289758 | 5.239774 | -0.40744 | 0.843186128 | NA          |
| 393.1155 | 465.4169 | 430.7095 | 0.009799 | 0.579415204 | 0.986255577 |
| 394.0089 | 312.1359 | 411.8463 | -0.03178 | 0.38010566  | 0.918453677 |
| 1897.676 | 1947.133 | 1986.922 | -0.15316 | 0.490493745 | 0.243675681 |

|          |          |          |          |             |             |
|----------|----------|----------|----------|-------------|-------------|
| 360.9515 | 422.684  | 450.6206 | -0.07538 | 0.8968711   | 0.786706509 |
| 8435.007 | 8384.935 | 7949.786 | -0.06898 | 0.045913153 | 0.533405119 |
| 634.3454 | 635.4194 | 578.4711 | 0.117811 | 0.527593235 | 0.708596546 |
| 368.9925 | 308.42   | 441.189  | -0.20371 | 0.743382516 | 0.493206792 |
| 19.65577 | 10.21873 | 11.5275  | 0.455399 | 0.967317013 | NA          |
| 1994.168 | 2304.789 | 1816.106 | 0.150517 | 0.181062142 | 0.394044776 |
| 930.9689 | 898.3196 | 863.5148 | 0.208585 | 0.981584314 | 0.162129177 |
| 1.786889 | 0.928976 | 1.047955 | -1.0314  | NA          | NA          |
| 1147.182 | 1390.677 | 1348.718 | -0.2327  | 0.648256394 | 0.208176931 |
| 354.6974 | 329.7864 | 333.2497 | 0.15872  | 0.246273306 | 0.533112779 |
| 1717.2   | 1595.051 | 1460.849 | 0.285527 | 0.208221128 | 0.223904778 |
| 5668.01  | 5735.496 | 5143.363 | 0.159634 | 0.37106799  | 0.323917219 |
| 1149.863 | 1067.393 | 884.4739 | 0.100869 | 0.027170262 | 0.728985289 |
| 120.615  | 129.1276 | 141.4739 | -0.32242 | 0.369650796 | 0.418473065 |
| 3471.924 | 3079.555 | 3202.55  | 0.088911 | 0.004218142 | 0.66509742  |
| 823.7556 | 870.4503 | 745.0959 | -0.0226  | 0.192952947 | 0.923725803 |
| 1894.995 | 1875.602 | 2422.872 | -0.44338 | 0.078425971 | 0.001283062 |
| 1239.207 | 1162.149 | 1093.017 | 0.039501 | 0.904997879 | 0.832306222 |
| 2209.488 | 2267.63  | 2059.231 | 0.088531 | 0.000548353 | 0.583691606 |
| 598.6077 | 571.3201 | 618.2934 | -0.35328 | 0.208033102 | 0.105321547 |
| 267.1398 | 327.9284 | 288.1876 | 0.297345 | 0.012060723 | 0.221138056 |
| 222.4676 | 205.3036 | 238.9337 | 0.165996 | 0.73037883  | 0.672730781 |
| 541.4272 | 579.6809 | 488.347  | 0.260776 | 0.29215357  | 0.383690121 |
| 620.9438 | 510.0077 | 554.3681 | -0.25928 | 0.000208059 | 0.243388227 |
| 2226.463 | 2328.942 | 2299.213 | 0.094805 | 0.999646615 | 0.55088846  |
| 3461.203 | 3088.844 | 3205.694 | 0.085357 | 0.230347011 | 0.741928459 |
| 548.5748 | 619.6268 | 543.8886 | 0.111202 | 0.90738959  | 0.718291318 |
| 611.1159 | 617.7689 | 591.0466 | -0.10345 | 0.880275635 | 0.639253997 |
| 2519.513 | 2257.411 | 2515.092 | -0.2592  | 0.230347011 | 0.010871985 |
| 2204.127 | 2192.383 | 2204.897 | -0.363   | 0.049453408 | 0.000370769 |
| 1193.642 | 1108.268 | 1058.434 | 0.312937 | 0.237372928 | 0.265938654 |
| 0.893444 | 1.857952 | 3.143865 | #DIV/0!  | NA          | NA          |
| 435.1074 | 497.931  | 420.2299 | 0.241495 | 0.666951881 | 0.403033225 |
| 32764.39 | 31366.87 | 32452.02 | -0.05292 | 0.032727278 | 0.647117771 |
| 2259.521 | 2262.056 | 2039.32  | 0.18064  | 0.97820156  | 0.423493651 |
| 858.5999 | 859.3026 | 964.1185 | -0.26419 | 0.959504681 | 0.150320193 |
| 2200.553 | 2309.434 | 2241.576 | 0.094353 | 0.83213076  | 0.561102297 |
| 0        | 0        | 0        | #DIV/0!  | NA          | NA          |
| 1367.863 | 1387.89  | 1350.814 | 0.049744 | 0.888097311 | 0.795108707 |
| 463.6976 | 462.6299 | 488.347  | 0.008642 | 0.868137167 | 0.974691849 |
| 1639.47  | 1697.239 | 1472.377 | 0.092664 | 0.100001859 | 0.699804545 |
| 0        | 0        | 0        | #DIV/0!  | NA          | NA          |
| 0        | 0        | 0        | #DIV/0!  | NA          | NA          |
| 8436.794 | 8900.517 | 8795.485 | -0.06881 | 0.19615888  | 0.638648576 |
| 1209.724 | 1116.629 | 940.0155 | -0.00217 | 0.954065397 | 0.997469085 |
| 0        | 0        | 0        | #NUM!    | NA          | NA          |
| 4.467221 | 9.289758 | 5.239774 | 0.076113 | NA          | NA          |
| 4038.368 | 4113.505 | 4488.391 | -0.14774 | 0.962660515 | 0.22043651  |
| 717.4357 | 770.1209 | 747.1918 | 0.004297 | 0.907772492 | 0.97680656  |
| 1623.388 | 1629.423 | 1534.206 | -0.02888 | 0.412665866 | 0.907489673 |
| 55.39354 | 36.23005 | 49.25388 | -0.32624 | 0.233378357 | 0.607944538 |
| 839.8376 | 850.0128 | 892.8576 | 0.149633 | 0.803209236 | 0.502996806 |
| 0        | 0        | 0        | #NUM!    | NA          | NA          |
| 0        | 0.928976 | 1.047955 | 0.229302 | NA          | NA          |

|          |          |          |          |             |             |
|----------|----------|----------|----------|-------------|-------------|
| 1503.667 | 1491.935 | 1430.458 | -0.08834 | 0.413714744 | 0.627713216 |
| 578.9519 | 561.1014 | 582.6629 | 0.050109 | 0.151730694 | 0.818055883 |
| 7.147554 | 6.50283  | 5.239774 | 0.261741 | 0.503345543 | NA          |
| 772.8293 | 699.5187 | 649.732  | 0.156125 | 0.743382516 | 0.523923403 |
| 259.0988 | 282.4086 | 238.9337 | -0.05396 | 0.729848204 | 0.886786965 |
| 5118.542 | 5432.65  | 5535.298 | -0.19498 | 0.352221493 | 0.143013287 |
| 2847.407 | 3032.177 | 3122.906 | -0.10078 | 0.703034676 | 0.656215943 |
| 933.6492 | 850.9418 | 885.5219 | 0.118888 | 0.884692467 | 0.56192082  |
| 1546.552 | 1735.327 | 1509.055 | 0.003216 | 0.550503835 | 0.990023409 |
| 0        | 0        | 0        | #NUM!    | NA          | NA          |
| 0        | 0        | 0        | #NUM!    | NA          | NA          |
| 0        | 0        | 0        | #NUM!    | NA          | NA          |
| 0        | 0        | 0        | #NUM!    | NA          | NA          |
| 0.893444 | 0        | 1.047955 | 0.203136 | NA          | NA          |
| 1620.708 | 1618.276 | 1364.437 | -0.0033  | 0.250094568 | 0.992866088 |
| 11780.96 | 11205.31 | 12670.82 | 0.165694 | 0.363948776 | 0.236901534 |
| 5.360666 | 0        | 2.09591  | -0.27305 | NA          | NA          |
| 3.573777 | 1.857952 | 3.143865 | 2.346276 | NA          | NA          |
| 1029.248 | 925.2599 | 903.3371 | 0.19794  | 0.867574132 | 0.369657389 |
| 2568.652 | 2405.118 | 2398.769 | -0.10877 | 0.000656764 | 0.486031819 |
| 648.6405 | 679.0813 | 523.9774 | 0.034718 | 0.310443697 | 0.921848549 |
| 550.3617 | 531.3741 | 514.5459 | 0.06822  | 0.825444223 | 0.801363023 |
| 629.8782 | 651.212  | 582.6629 | 0.232689 | 0.873884347 | 0.267586812 |
| 199.2381 | 231.315  | 206.4471 | 0.266267 | 0.084077452 | 0.322653852 |
| 125.9756 | 82.67884 | 88.02821 | 0.053396 | 0.521522096 | 0.911521311 |
| 3851.638 | 3963.011 | 3854.378 | -0.05345 | 0.978922635 | 0.702040936 |
| 3180.662 | 3091.631 | 3354.504 | -0.12322 | 0.854950923 | 0.385996817 |
| 5.360666 | 6.50283  | 1.047955 | -0.85097 | 0.848694292 | NA          |
| 18974.08 | 18642.69 | 19590.47 | -0.26821 | 0.572219847 | 0.057314358 |
| 1157.904 | 1265.265 | 1338.238 | -0.19495 | 0.98843748  | 0.28127578  |
| 1185.601 | 1360.949 | 1400.068 | -0.1826  | 0.940969382 | 0.300201673 |
| 1166.838 | 1192.805 | 1176.853 | 0.032312 | 0.537178644 | 0.858512476 |
| 1.786889 | 2.786927 | 0        | #DIV/0!  | NA          | NA          |
| 701.3537 | 760.8311 | 684.3145 | 0.195664 | 0.988049891 | 0.223810637 |
| 464.591  | 540.6639 | 526.0734 | -0.134   | 0.62498123  | 0.575540189 |
| 545.8944 | 589.8996 | 643.4443 | -0.13462 | 0.863207554 | 0.685537269 |
| 1894.995 | 1694.452 | 1495.432 | 0.276206 | 0.153154897 | 0.080704627 |
| 0.893444 | 2.786927 | 4.19182  | #DIV/0!  | NA          | NA          |
| 609.329  | 696.7318 | 832.0762 | 0.051334 | 0.965666941 | 0.886786965 |
| 16.97544 | 14.86361 | 45.06206 | -0.52841 | 0.654781049 | NA          |
| 2399.791 | 2275.991 | 2413.44  | -0.06245 | 0.001564335 | 0.740438137 |
| 207.2791 | 168.1446 | 248.3653 | -0.65682 | 0.057104652 | 0.003921392 |
| 8.934443 | 11.14771 | 14.67137 | -0.18916 | 0.221695862 | NA          |
| 127.7625 | 127.2697 | 213.7828 | 0.338872 | 0.303314321 | 0.41069386  |
| 934.5427 | 908.5383 | 739.8562 | 0.154817 | 0.796419683 | 0.596309029 |
| 3000.186 | 2923.487 | 2919.602 | -0.13638 | 0.01483465  | 0.168460337 |
| 1987.913 | 2107.846 | 2586.353 | -0.52059 | 0.843186128 | 0.001198985 |
| 426.1729 | 416.1811 | 387.7433 | 0.04696  | 0.787835013 | 0.870138542 |
| 1.786889 | 1.857952 | 2.09591  | -1.35136 | NA          | NA          |
| 738.8784 | 775.6948 | 732.5205 | -0.097   | 0.721504488 | 0.60614092  |
| 37.52466 | 30.6562  | 28.29478 | -0.56299 | 0.669860929 | 0.385354962 |
| 3260.178 | 3179.884 | 2941.609 | 0.140194 | 0.030520992 | 0.399254174 |
| 2120.143 | 2323.368 | 2276.158 | -0.28514 | 0.482562486 | 0.050220436 |
| 33.95088 | 11.14771 | 22.00705 | 0.481757 | 0.936346196 | NA          |

|          |          |          |          |             |             |
|----------|----------|----------|----------|-------------|-------------|
| 1676.101 | 1527.236 | 1765.804 | -0.07775 | 0.981637588 | 0.655129754 |
| 7.147554 | 9.289758 | 6.287729 | 0.476397 | 0.383871116 | NA          |
| 878.2557 | 731.1039 | 708.4175 | 0.086174 | 0.496884574 | 0.703453769 |
| 202.8118 | 170.9315 | 195.9676 | -0.63738 | 0.075331737 | 0.010292932 |
| 567.3371 | 650.283  | 580.567  | 0.013691 | 0.569085135 | 0.971658868 |
| 2.680333 | 2.786927 | 3.143865 | -0.06537 | NA          | NA          |
| 300.1973 | 358.5846 | 292.3794 | 0.134073 | 0.783760899 | 0.690294956 |
| 526.2387 | 482.1384 | 419.182  | -0.03976 | 0.901380807 | 0.91305142  |
| 3168.153 | 3133.435 | 3899.44  | -0.19894 | 0.98843748  | 0.501904702 |
| 0        | 2.786927 | 1.047955 | -0.39974 | NA          | NA          |
| 0.893444 | 0        | 4.19182  | 1.949066 | NA          | NA          |
| 1712.733 | 1716.747 | 2005.786 | -0.0444  | 0.430461737 | 0.864107722 |
| 2469.48  | 2377.249 | 2372.57  | -0.02338 | 0.928104954 | 0.929693512 |
| 1618.028 | 1642.429 | 1648.433 | -0.09651 | 0.779325825 | 0.536657785 |
| 1270.478 | 1344.228 | 1358.15  | -0.03589 | 0.497263297 | 0.872630949 |
| 367.2056 | 428.2578 | 391.9351 | -0.06591 | 0.666493976 | 0.835596295 |
| 549.4682 | 465.4169 | 328.0099 | 0.300191 | 0.63463635  | 0.327911681 |
| 21065.63 | 20745.89 | 21550.14 | -0.34517 | 0.501025279 | 0.005879945 |
| 795.1654 | 728.317  | 760.8153 | 0.178498 | 0.856547191 | 0.290794331 |
| 4408.254 | 4289.081 | 4238.978 | 0.004092 | 0.013199381 | 0.984451848 |
| 0        | 0        | 2.09591  | #DIV/0!  | NA          | NA          |
| 737.985  | 673.5074 | 664.4034 | 0.207713 | 0.961122583 | 0.37977825  |
| 9.827887 | 1.857952 | 8.383639 | -0.0268  | 0.846759683 | NA          |
| 57385.92 | 55399.47 | 56731.04 | -0.17589 | 0.826883467 | 0.228353073 |
| 11354.78 | 11464.49 | 11439.48 | -0.36247 | 0.610617723 | 0.013575411 |
| 3.573777 | 1.857952 | 0        | -1.43119 | NA          | NA          |
| 0        | 1.857952 | 4.19182  | 0.257957 | NA          | NA          |
| 2238.078 | 2461.786 | 2725.731 | -0.13358 | 0.574512226 | 0.41892422  |
| 1779.741 | 2036.315 | 2088.574 | -0.31008 | 0.892193515 | 0.131512208 |
| 1797.61  | 1954.565 | 1658.913 | 0.009281 | 0.51970267  | 0.972140885 |
| 365.4187 | 350.2239 | 357.3526 | 0.197252 | 0.249815953 | 0.436395412 |
| 288.5825 | 347.4369 | 288.1876 | 0.098922 | 0.331866416 | 0.752110266 |
| 2.680333 | 3.715903 | 3.143865 | 1.667399 | NA          | NA          |
| 624.5175 | 608.4791 | 623.5332 | -0.00487 | 0.466761023 | 0.987875073 |
| 473.5255 | 429.1868 | 477.8674 | 0.370238 | 0.647202438 | 0.101359597 |
| 955.0919 | 1102.694 | 888.6657 | 0.042247 | 0.835368749 | 0.885788144 |
| 410.0909 | 510.0077 | 536.5529 | 0.031953 | 0.871252597 | 0.921848549 |
| 934.5427 | 826.7884 | 842.5557 | 0.054113 | 0.54674796  | 0.844024501 |
| 772.8293 | 803.564  | 883.426  | 0.216635 | 0.837998472 | 0.206834201 |
| 880.936  | 850.0128 | 1023.852 | -0.02637 | 0.732140966 | 0.91372954  |
| 536.0666 | 550.8826 | 556.464  | -0.24494 | 0.425091186 | 0.224439117 |
| 545.8944 | 600.1183 | 625.6291 | -0.10911 | 0.475984345 | 0.626775052 |
| 7685.408 | 7598.093 | 7825.079 | -0.10304 | 0.51752002  | 0.406585578 |
| 83.09032 | 114.264  | 92.22003 | 0.258879 | 0.973922065 | 0.635110879 |
| 292.1563 | 389.2408 | 345.8251 | 0.073418 | 0.935100162 | 0.814086627 |
| 5.360666 | 0.928976 | 4.19182  | #DIV/0!  | NA          | NA          |
| 22906.12 | 22517.44 | 26182.11 | -0.4559  | 0.904254847 | 0.000514141 |
| 16.082   | 33.44313 | 14.67137 | 0.135784 | 0.555851348 | NA          |
| 11313.68 | 11291.7  | 11840.84 | -0.21457 | 0.02013663  | 0.022543507 |
| 2114.783 | 2316.866 | 2355.803 | -0.08038 | 0.881060269 | 0.696921855 |
| 3244.096 | 3840.386 | 3662.602 | -0.22035 | 0.720425175 | 0.166478516 |
| 5681.412 | 5448.443 | 5425.262 | -0.0424  | 0.914186189 | 0.791888862 |
| 1034.608 | 1041.382 | 877.1382 | 0.214159 | 0.455280748 | 0.304039612 |
| 104.533  | 68.74421 | 88.02821 | -0.42889 | 0.119516174 | 0.348491003 |

|          |          |          |          |             |             |
|----------|----------|----------|----------|-------------|-------------|
| 211.7463 | 230.386  | 206.4471 | 0.019861 | 0.875368742 | 0.96505606  |
| 449.4025 | 560.1724 | 500.9224 | 0.358628 | 0.665579954 | 0.057717325 |
| 802.3129 | 683.7262 | 610.9577 | 0.149277 | 0.71440019  | 0.707584171 |
| 3146.711 | 3261.634 | 3110.33  | 0.092387 | 0.734144448 | 0.448426543 |
| 1945.922 | 1961.068 | 1863.264 | 0.112721 | 0.009017011 | 0.544356068 |
| 250.1644 | 273.1189 | 190.7278 | 0.051671 | 0.880647749 | 0.88945982  |
| 737.985  | 688.371  | 629.8209 | 0.429352 | 0.831439424 | 0.190817982 |
| 1853.897 | 1910.903 | 2208.041 | -0.16088 | 0.930586489 | 0.381961888 |
| 3.573777 | 7.431806 | 11.5275  | -0.16962 | 0.899176451 | NA          |
| 17.86889 | 18.57952 | 13.62341 | 1.345296 | 0.941273396 | NA          |
| 5565.264 | 5842.329 | 6492.081 | 0.127965 | 0.780724949 | 0.41822825  |
| 0        | 0        | 0        | #DIV/0!  | NA          | NA          |
| 0        | 0        | 0        | #DIV/0!  | NA          | NA          |
| 261.7792 | 262.9001 | 226.3583 | -0.25699 | 0.072365168 | 0.354829766 |
| 0        | 0.928976 | 0        | -0.50354 | NA          | NA          |
| 0        | 0.928976 | 0        | -0.50354 | NA          | NA          |
| 2159.455 | 2171.016 | 2089.622 | 0.002954 | 0.000593396 | 0.992729462 |
| 16372.37 | 16484.67 | 17316.41 | -0.47363 | 0.638519612 | 0.000657216 |
| 326.1072 | 247.1076 | 270.3724 | 0.294518 | 0.779325825 | 0.315911601 |
| 375.2466 | 376.2352 | 343.7292 | -0.30755 | 0.856505841 | 0.097581147 |
| 305.5579 | 360.4426 | 402.4147 | -0.04973 | 0.637435429 | 0.884584155 |
| 205.4922 | 230.386  | 235.7899 | -0.27001 | 0.871801928 | 0.329468078 |
| 1242.781 | 1169.58  | 1393.78  | -0.24017 | 0.971068458 | 0.178822023 |
| 134.9101 | 151.423  | 170.8166 | 0.062526 | 0.759261525 | 0.89838494  |
| 3652.4   | 3637.869 | 3407.949 | 0.062124 | 3.48359E-05 | 0.725549438 |
| 607.5421 | 649.3541 | 667.5473 | 0.082013 | 0.387628548 | 0.708596546 |
| 393.1155 | 392.9567 | 448.5247 | -0.03504 | 0.31724782  | 0.913266339 |
| 1071.24  | 1103.623 | 1077.298 | 0.287388 | 0.077699804 | 0.103528732 |
| 47278.39 | 45781.78 | 46403.44 | -0.32217 | 0.811082292 | 0.005454133 |
| 2439.103 | 2626.214 | 2659.71  | -0.28441 | 0.946696226 | 0.010267904 |
| 2550.783 | 2365.172 | 2571.681 | 0.109646 | 0.890335462 | 0.515054924 |
| 2202.34  | 2160.798 | 2428.111 | -0.10939 | 0.988569159 | 0.642738974 |
| 273.3939 | 265.6871 | 316.4824 | 0.128764 | 0.717185827 | 0.679997772 |
| 337.7219 | 297.2722 | 306.0028 | 0.184428 | 0.900088322 | 0.501883079 |
| 295.73   | 246.1786 | 312.2906 | 0.500466 | 0.812875146 | 0.154195687 |
| 3698.859 | 3337.81  | 3032.781 | 0.393294 | 0.173129151 | 0.10698808  |
| 1576.036 | 1764.125 | 1707.119 | -0.19403 | 0.729802201 | 0.167165088 |
| 105.4264 | 120.7668 | 98.50776 | -0.39213 | 0.84337655  | 0.24818395  |
| 1.786889 | 1.857952 | 2.09591  | 1.767279 | NA          | NA          |
| 1680.569 | 1588.549 | 1585.556 | 0.066167 | 0.910682739 | 0.765144842 |
| 26981.12 | 27102.87 | 26487.06 | -0.29442 | 0.597867308 | 0.025884044 |
| 628.9848 | 693.9449 | 661.2595 | -0.04651 | 0.941323092 | 0.859505388 |
| 900.5918 | 1020.944 | 995.5571 | -0.20715 | 0.577332911 | 0.240893274 |
| 240.3365 | 238.7468 | 216.9267 | -0.12633 | 0.272240073 | 0.718291318 |
| 101459.5 | 96397.96 | 81927.02 | 0.042607 | 0.084787806 | 0.869372302 |
| 193.8774 | 199.7298 | 202.2553 | 0.075264 | 0.628616407 | 0.835596295 |
| 2650.849 | 2628.072 | 2427.064 | -0.03748 | 0.00628885  | 0.855100406 |
| 939.9034 | 1030.234 | 1189.429 | -0.33407 | 0.87345829  | 0.039409822 |
| 638.8126 | 538.8059 | 602.5741 | -0.19503 | 0.960823113 | 0.283832642 |
| 1332.125 | 1221.603 | 1410.547 | -0.01327 | 0.285144055 | 0.952680272 |
| 17892.11 | 17544.64 | 17926.32 | -0.05407 | 0.935506037 | 0.743917252 |
| 24.12299 | 43.66186 | 59.73343 | -0.21851 | 0.952331288 | NA          |
| 30.3771  | 33.44313 | 35.63047 | -0.2489  | 0.831235563 | 0.722021255 |
| 11.61478 | 6.50283  | 13.62341 | 0.730606 | 0.271435677 | NA          |

|          |          |          |          |             |             |
|----------|----------|----------|----------|-------------|-------------|
| 515.5173 | 540.6639 | 425.4697 | 0.354428 | 0.982541147 | 0.093149564 |
| 732.6243 | 790.5584 | 634.0127 | 0.039928 | 0.596065856 | 0.897900971 |
| 740.6653 | 732.9619 | 656.0198 | 0.091806 | 0.999122571 | 0.641336618 |
| 13706.33 | 13596.49 | 13424.3  | 0.080859 | 0.482847539 | 0.502156977 |
| 871.1082 | 883.4559 | 1060.53  | -0.11033 | 0.811082292 | 0.656368654 |
| 9.827887 | 6.50283  | 10.47955 | -0.47055 | 0.836356366 | NA          |
| 23.22955 | 16.72156 | 29.34274 | -0.57566 | 0.900088322 | NA          |
| 41.09844 | 68.74421 | 51.34979 | 0.149547 | 0.983824284 | 0.831655346 |
| 1190.961 | 1098.049 | 1161.134 | 0.105661 | 0.182617755 | 0.647435632 |
| 900.5918 | 804.493  | 714.7052 | 0.401144 | 0.504924333 | 0.045848266 |
| 2294.365 | 2112.491 | 2169.267 | -0.14996 | 0.968325512 | 0.240898563 |
| 890.7639 | 876.0241 | 813.213  | 0.155834 | 0.245108675 | 0.492960564 |
| 523.5583 | 444.0504 | 481.0113 | -0.04831 | 0.554349677 | 0.881724648 |
| 973.8542 | 935.4786 | 860.371  | 0.099885 | 0.139818546 | 0.700799427 |
| 405.6237 | 362.3005 | 462.1481 | -0.0641  | 0.981023664 | 0.855100406 |
| 630.7716 | 657.7148 | 575.3272 | -0.00793 | 0.497309965 | 0.979493428 |
| 1085.535 | 1207.668 | 1191.525 | -0.23001 | 0.872688807 | 0.089192563 |
| 691.5259 | 580.6099 | 760.8153 | -0.12524 | 0.716459644 | 0.596309029 |
| 1.786889 | 0.928976 | 5.239774 | 0.880806 | NA          | NA          |
| 3813.22  | 3909.13  | 3593.437 | 0.017303 | 0.259281616 | 0.914553818 |
| 1046.223 | 1045.098 | 957.8308 | 0.234407 | 0.976661259 | 0.146815781 |
| 559.2961 | 698.5898 | 553.3202 | -0.08358 | 0.504339531 | 0.764338813 |
| 2446.25  | 2514.737 | 2094.862 | 0.19182  | 0.152686951 | 0.519258549 |
| 2997.505 | 3008.024 | 2893.403 | 0.071784 | 0.272240073 | 0.684131921 |
| 162.6069 | 229.457  | 210.6389 | 0.017161 | 0.498379067 | 0.96505606  |
| 525.3452 | 552.7406 | 388.7913 | 0.046966 | 0.924509037 | 0.881268659 |
| 662.9356 | 667.0046 | 534.457  | 0.062194 | 0.794232621 | 0.838059844 |
| 461.9107 | 455.1981 | 436.9972 | 0.034057 | 0.66770133  | 0.913036427 |
| 1.786889 | 0        | 3.143865 | -1.64179 | NA          | NA          |
| 398.4761 | 403.1755 | 387.7433 | 0.153588 | 0.543612102 | 0.561176106 |
| 1286.56  | 1183.515 | 1125.504 | 0.102437 | 0.7406592   | 0.547627123 |
| 75.94276 | 64.09933 | 90.12412 | -0.1345  | 0.225736107 | 0.802920813 |
| 2239.865 | 2055.823 | 1984.827 | 0.148589 | 0.136068446 | 0.457772469 |
| 301.9842 | 292.6274 | 282.9478 | -0.56721 | 2.34806E-39 | 0.000330467 |
| 437.7877 | 454.2691 | 429.6615 | -0.24012 | 0.337335124 | 0.161220563 |
| 1257.076 | 1386.961 | 1285.841 | -0.28309 | 0.430461737 | 0.043279608 |
| 0        | 0        | 0        | #DIV/0!  | NA          | NA          |
| 0        | 0        | 0        | #DIV/0!  | NA          | NA          |
| 0        | 0        | 0        | #DIV/0!  | NA          | NA          |
| 0        | 0        | 0        | #DIV/0!  | NA          | NA          |
| 2649.956 | 2609.493 | 2566.442 | 0.216196 | 0.720425175 | 0.051095669 |
| 1343.74  | 1332.151 | 1469.233 | -0.37973 | 0.32159394  | 0.009064744 |
| 280.5415 | 368.8034 | 342.6813 | 0.193585 | 0.657109304 | 0.569294963 |
| 610.2224 | 528.5872 | 659.1636 | -0.065   | 0.314709824 | 0.793207865 |
| 4162.557 | 4378.263 | 3703.473 | -0.00539 | 0.301433669 | 0.987413808 |
| 973.8542 | 929.9047 | 879.2342 | 0.273772 | 0.159614653 | 0.361564535 |
| 3499.621 | 3638.798 | 3559.903 | -0.02387 | 0.811082292 | 0.896421455 |
| 670.9766 | 645.6382 | 647.6361 | 0.330287 | 0.023800238 | 0.065123044 |
| 523.5583 | 603.8342 | 644.4923 | -0.08745 | 0.926756894 | 0.732368319 |
| 8310.818 | 7840.555 | 8555.504 | -0.17714 | 0.525162342 | 0.150260522 |
| 661.1488 | 672.5785 | 671.7391 | 0.226013 | 0.430461737 | 0.137783355 |
| 920.2476 | 784.0555 | 813.213  | 0.314645 | 0.086446082 | 0.181725119 |
| 978.3215 | 1010.726 | 794.3498 | 0.180324 | 0.953918397 | 0.352822706 |
| 1.786889 | 2.786927 | 4.19182  | -0.23653 | NA          | NA          |

|          |          |          |          |             |             |
|----------|----------|----------|----------|-------------|-------------|
| 612.0093 | 660.5018 | 598.3822 | 0.049416 | 0.811220717 | 0.875604624 |
| 8549.368 | 8499.199 | 8832.164 | -0.28293 | 0.671382026 | 0.005450387 |
| 1209.724 | 1294.992 | 1240.779 | 0.079379 | 0.831439424 | 0.622064701 |
| 26.80333 | 27.86927 | 30.39069 | -0.27918 | 0.888097311 | NA          |
| 4117.885 | 3878.474 | 4029.387 | -0.14893 | 0.692644952 | 0.178937334 |
| 631.6651 | 774.7658 | 771.2948 | 0.086961 | 0.980746287 | 0.727522975 |
| 418.1319 | 429.1868 | 484.1552 | 0.347466 | 0.000302523 | 0.054060197 |
| 21.44266 | 18.57952 | 33.53456 | 0.29999  | 0.913769516 | NA          |
| 29382.7  | 29478.26 | 31330.71 | -0.45435 | 0.671382026 | 0.00095673  |
| 372.5663 | 338.1472 | 325.914  | 0.012909 | 0.31587804  | 0.975950358 |
| 0.893444 | 0        | 0        | #DIV/0!  | NA          | NA          |
| 657.575  | 579.6809 | 658.1157 | 0.358393 | 0.690861229 | 0.019657367 |
| 1616.241 | 1413.901 | 1475.52  | 0.021535 | 0.764395772 | 0.928761588 |
| 2092.446 | 2003.801 | 1795.147 | 0.131459 | 0.473286484 | 0.34571639  |
| 870.2147 | 783.1266 | 741.9521 | 0.255274 | 0.476445149 | 0.225630132 |
| 297.5169 | 239.6757 | 238.9337 | 0.320466 | 0.703609106 | 0.238605598 |
| 1058.731 | 1075.754 | 1196.764 | -0.36376 | 0.249012381 | 0.023203343 |
| 42936.25 | 41654.34 | 41247.5  | -0.24069 | 0.853477462 | 0.118176723 |
| 333.2547 | 374.3772 | 397.1749 | -0.02283 | 0.363948776 | 0.94960537  |
| 245.6972 | 265.6871 | 241.0296 | 0.195225 | 0.231792531 | 0.553844877 |
| 972.9608 | 1244.828 | 1113.976 | -0.11266 | 0.927256678 | 0.640018073 |
| 5.360666 | 3.715903 | 13.62341 | 0.287491 | 0.960773888 | NA          |
| 1078.387 | 1007.939 | 1020.708 | 0.14872  | 0.729944386 | 0.462496385 |
| 665.616  | 744.1096 | 621.4373 | -0.00842 | 0.557418993 | 0.988370025 |
| 150.9921 | 213.6644 | 199.1114 | -0.1421  | 0.467380763 | 0.712891158 |
| 3250.35  | 3189.174 | 2897.595 | 0.029804 | 0.00077072  | 0.865246562 |
| 1511.708 | 1475.214 | 1838.113 | -0.04514 | 0.944173424 | 0.859010941 |
| 1903.93  | 1770.628 | 1581.364 | 0.08201  | 0.1202463   | 0.737751404 |
| 43.77877 | 56.66752 | 68.11707 | -0.42802 | 0.986125936 | 0.359873864 |
| 291.2628 | 320.4966 | 367.8322 | -0.22729 | 0.105688589 | 0.383494766 |
| 534.2797 | 510.9367 | 518.7377 | 0.287226 | 0.999122571 | 0.21207515  |
| 174.2216 | 191.369  | 157.1932 | 0.256128 | 0.30299466  | 0.568964645 |
| 57551.21 | 57116.22 | 68528.91 | -0.2508  | 0.279564109 | 0.119487438 |
| 32.16399 | 45.51981 | 33.53456 | -0.58897 | 0.072199218 | 0.280245751 |
| 2213.061 | 1977.789 | 1882.127 | 0.218563 | 0.0444701   | 0.423534898 |
| 878.2557 | 855.5867 | 833.1241 | -0.18258 | 0.688569751 | 0.237500588 |
| 0        | 0        | 2.09591  | #DIV/0!  | NA          | NA          |
| 0        | 0.928976 | 1.047955 | #DIV/0!  | NA          | NA          |
| 0.893444 | 0.928976 | 0        | #DIV/0!  | NA          | NA          |
| 0.893444 | 0.928976 | 0        | #DIV/0!  | NA          | NA          |
| 0.893444 | 0.928976 | 0        | #DIV/0!  | NA          | NA          |
| 838.0507 | 842.581  | 749.2877 | 0.126498 | 0.03547414  | 0.595440724 |
| 0        | 1.857952 | 0        | #DIV/0!  | NA          | NA          |
| 0        | 1.857952 | 0        | #DIV/0!  | NA          | NA          |
| 0        | 1.857952 | 0        | #DIV/0!  | NA          | NA          |
| 0        | 1.857952 | 0        | #DIV/0!  | NA          | NA          |
| 746.9194 | 650.283  | 759.7673 | 0.136951 | 0.828016939 | 0.542805648 |
| 2213.955 | 2300.144 | 2040.368 | 0.086263 | 0.484084014 | 0.691256188 |
| 1136.461 | 979.1405 | 1262.786 | 0.104795 | 0.233074614 | 0.695789063 |
| 5171.255 | 5327.676 | 5261.782 | -0.05606 | 0.105979651 | 0.751824432 |
| 1.786889 | 0        | 0        | #DIV/0!  | NA          | NA          |
| 1.786889 | 0        | 0        | #DIV/0!  | NA          | NA          |
| 1.786889 | 0        | 0        | #DIV/0!  | NA          | NA          |
| 1.786889 | 3.715903 | 2.09591  | 0.127822 | NA          | NA          |



|           |           |           |           |              |              |
|-----------|-----------|-----------|-----------|--------------|--------------|
| 1. 786889 | 1. 857952 | 1. 047955 | -0. 35616 | NA           |              |
| 2387. 283 | 2306. 647 | 2020. 457 | 0. 085956 | 0. 66770133  | 0. 79052565  |
| 14. 29511 | 0. 928976 | 2. 09591  | -0. 44989 | NA           |              |
| 2835. 792 | 2615. 996 | 3291. 626 | -0. 07653 | 0. 805217464 | 0. 718323278 |
| 468. 1648 | 619. 6268 | 666. 4993 | 0. 061529 | 0. 996781128 | 0. 849305911 |
| 662. 9356 | 661. 4307 | 774. 4387 | -0. 2263  | 0. 544035793 | 0. 293133991 |
| 98. 27887 | 98. 47143 | 103. 7475 | -0. 25086 | 0. 389992881 | 0. 579811887 |
| 2900. 12  | 2864. 032 | 2874. 54  | -0. 00946 | 0. 766253365 | 0. 97378472  |
| 393. 1155 | 475. 6356 | 523. 9774 | 0. 567026 | 0. 828016939 | 0. 01925496  |
| 746. 9194 | 693. 0159 | 960. 9746 | -0. 32145 | 0. 310443697 | 0. 116630357 |
| 737. 985  | 696. 7318 | 638. 2045 | 0. 024885 | 0. 66770133  | 0. 923725803 |
| 16352. 71 | 15344. 82 | 15061. 21 | -0. 16917 | 0. 792297854 | 0. 167949464 |
| 139. 3773 | 143. 9912 | 137. 2821 | -0. 33843 | 0. 812875146 | 0. 255474802 |
| 1022. 994 | 971. 7086 | 1126. 552 | 0. 190608 | 0. 862452498 | 0. 349930843 |
| 75. 04932 | 59. 45445 | 70. 21298 | -0. 03432 | 0. 851080991 | 0. 939380143 |
| 1. 786889 | 13. 00566 | 9. 431594 | 1. 616154 | 0. 757669883 | NA           |
| 641. 493  | 626. 1297 | 608. 8618 | 0. 225996 | 0. 34723135  | 0. 255165763 |
| 228. 7217 | 251. 7524 | 259. 8928 | 0. 170036 | 0. 416597489 | 0. 542805648 |
| 142. 9511 | 143. 0623 | 166. 6248 | 0. 064828 | 0. 665579954 | 0. 875604624 |
| 1493. 839 | 1385. 103 | 1509. 055 | 0. 512464 | 0. 38183291  | 0. 015498519 |
| 628. 9848 | 627. 0586 | 609. 9097 | 0. 086087 | 0. 455280748 | 0. 672747744 |
| 383. 2876 | 376. 2352 | 335. 3456 | -0. 07366 | 0. 365690431 | 0. 786995178 |
| 1280. 306 | 1255. 046 | 1302. 608 | 0. 061879 | 0. 962011634 | 0. 806564543 |
| 1789. 569 | 1900. 684 | 1823. 442 | -0. 38785 | 0. 757469981 | 0. 005720058 |
| 290. 3694 | 279. 6217 | 366. 7842 | -0. 30664 | 0. 901132408 | 0. 263268062 |
| 1558. 167 | 1436. 197 | 1601. 275 | -0. 14271 | 0. 056286582 | 0. 30760874  |
| 15393. 15 | 14479. 02 | 14930. 21 | -0. 02916 | 0. 582207349 | 0. 80432116  |
| 840. 731  | 808. 2089 | 856. 1791 | -0. 2175  | 0. 916416444 | 0. 200030838 |
| 830. 9032 | 818. 4276 | 864. 5628 | -0. 11666 | 0. 975298616 | 0. 583053599 |
| 1617. 134 | 1633. 139 | 1535. 254 | 0. 158316 | 0. 29215357  | 0. 413081195 |
| 0. 893444 | 1. 857952 | 0         | -2. 65101 | NA           |              |
| 651. 3209 | 741. 3227 | 725. 1848 | -0. 02048 | 0. 769710962 | 0. 937994709 |
| 1950. 389 | 1981. 505 | 2087. 526 | -0. 23272 | 0. 585762809 | 0. 112687221 |
| 586. 0994 | 563. 8883 | 428. 6136 | 0. 425362 | 0. 363948776 | 0. 514122373 |
| 337. 7219 | 332. 5733 | 417. 086  | -0. 72505 | 0. 046345161 | 9. 85399E-05 |
| 0         | 0. 928976 | 2. 09591  | -1. 71895 | NA           |              |
| 3272. 686 | 3393. 548 | 3084. 131 | -0. 07162 | 0. 947527175 | 0. 690294956 |
| 1162. 371 | 1215. 1   | 1240. 779 | 0. 152131 | 0. 429631603 | 0. 398344249 |
| 1850. 323 | 1909. 974 | 1593. 939 | 0. 126836 | 0. 999656194 | 0. 614824771 |
| 6. 25411  | 0. 928976 | 1. 047955 | 2. 643818 | NA           |              |
| 221. 5742 | 229. 457  | 187. 5839 | -0. 06936 | 0. 521899793 | 0. 8721296   |
| 846. 0917 | 707. 8795 | 864. 5628 | 0. 028141 | 0. 867490475 | 0. 919337062 |
| 0         | 0         | 0         | #NUM!     | NA           |              |
| 4. 467221 | 0         | 1. 047955 | -0. 82186 | NA           |              |
| 574. 4847 | 589. 8996 | 536. 5529 | -0. 01926 | 0. 80050738  | 0. 94960537  |
| 0         | 0         | 0         | #DIV/0!   | NA           |              |
| 0         | 0         | 0         | #DIV/0!   | NA           |              |
| 0         | 0         | 0         | #DIV/0!   | NA           |              |
| 628. 0913 | 700. 4477 | 678. 0268 | 0. 045118 | 0. 60948547  | 0. 86814025  |
| 184. 943  | 146. 7782 | 147. 7616 | 0. 815268 | 0. 274927458 | 0. 049190168 |
| 1212. 404 | 1267. 123 | 1061. 578 | 0. 037109 | 0. 515985444 | 0. 885975149 |
| 25. 01644 | 34. 3721  | 18. 86319 | -0. 02782 | 0. 122047295 | NA           |
| 668. 2963 | 691. 158  | 668. 5952 | 0. 077055 | 0. 332003738 | 0. 722021255 |
| 75038. 6  | 71553. 43 | 69187. 03 | -0. 02061 | 0. 009038328 | 0. 923910484 |

|           |           |           |           |    |              |              |
|-----------|-----------|-----------|-----------|----|--------------|--------------|
| 5. 360666 | 0. 928976 | 3. 143865 | -0. 74003 | NA | NA           |              |
| 897. 018  | 765. 476  | 887. 6178 | 0. 054189 |    | 0. 01003883  | 0. 84358525  |
| 256. 4185 | 309. 3489 | 313. 3385 | -0. 12847 |    | 0. 80037736  | 0. 693112942 |
| 0         | 0         | 0         | #NUM!     | NA | NA           |              |
| 182. 2626 | 190. 44   | 236. 8378 | 0. 375769 |    | 0. 607918252 | 0. 323379782 |
| 8. 934443 | 5. 573855 | 4. 19182  | 2. 827718 | NA | NA           |              |
| 951. 5181 | 816. 5697 | 932. 6799 | 0. 033382 |    | 0. 647710343 | 0. 880577976 |
| 1213. 297 | 1263. 407 | 1238. 683 | 0. 139228 |    | 0. 603004299 | 0. 431825344 |
| 598. 6077 | 671. 6495 | 722. 0409 | -0. 10888 |    | 0. 988569159 | 0. 690038797 |
| 370. 7794 | 403. 1755 | 444. 3329 | -0. 28377 |    | 0. 923364203 | 0. 149383412 |
| 6. 25411  | 9. 289758 | 6. 287729 | -0. 72322 |    | 0. 563351252 | NA           |
| 2. 680333 | 0. 928976 | 0         | 0. 454465 | NA | NA           |              |
| 696. 8865 | 770. 1209 | 747. 1918 | 0. 010918 |    | 0. 745767703 | 0. 966582892 |
| 1104. 297 | 1151. 93  | 1217. 724 | -0. 19215 |    | 0. 476024675 | 0. 321405678 |
| 2. 680333 | 2. 786927 | 3. 143865 | 0. 094945 | NA | NA           |              |
| 1256. 183 | 1240. 183 | 1483. 904 | -0. 24283 |    | 0. 655427675 | 0. 164996552 |
| 1529. 577 | 1480. 787 | 1547. 829 | 0. 051178 |    | 0. 567589507 | 0. 775439768 |
| 199. 2381 | 235. 0309 | 215. 8787 | 0. 297492 |    | 0. 035776598 | 0. 35429586  |
| 419. 0254 | 274. 9768 | 334. 2976 | 0. 09013  |    | 0. 625996416 | 0. 797601985 |
| 828. 2228 | 803. 564  | 805. 8773 | 0. 011882 |    | 0. 252404744 | 0. 970425422 |
| 3692. 605 | 3762. 352 | 3916. 207 | -0. 3052  |    | 0. 825797061 | 0. 034322372 |
| 9905. 616 | 9835. 066 | 8797. 581 | 0. 121777 |    | 0. 035172288 | 0. 527040487 |
| 14100. 34 | 13774. 85 | 14483. 78 | 0. 002246 |    | 0. 988569159 | 0. 990142758 |
| 637. 9192 | 641. 9223 | 664. 4034 | -0. 03685 |    | 0. 581224219 | 0. 87433787  |
| 62. 5411  | 83. 60782 | 57. 63752 | 0. 223407 |    | 0. 699574787 | 0. 735169964 |
| 1937. 881 | 2014. 019 | 2421. 824 | -0. 11507 |    | 2. 34671E-09 | 0. 60286387  |
| 513. 7304 | 548. 0957 | 427. 5656 | 0. 148478 |    | 0. 967693355 | 0. 697416669 |
| 10243. 34 | 9222. 871 | 9510. 191 | 0. 256152 |    | 0. 051055002 | 0. 227558056 |
| 784. 4441 | 769. 1919 | 737. 7602 | -0. 11932 |    | 0. 358814452 | 0. 55088846  |
| 255. 5251 | 324. 2125 | 275. 6121 | 0. 041445 |    | 0. 064827883 | 0. 914120833 |
| 41168. 12 | 41480. 63 | 42414. 93 | -0. 3678  |    | 0. 848681983 | 0. 007033921 |
| 250. 1644 | 257. 3263 | 325. 914  | -0. 00522 |    | 0. 57058689  | 0. 979395135 |
| 0. 893444 | 13. 00566 | 4. 19182  | -0. 60987 |    | 0. 812875146 | NA           |
| 8. 040998 | 9. 289758 | 12. 57546 | 0. 20624  |    | 0. 711398577 | NA           |
| 40. 20499 | 31. 58518 | 39. 82229 | 0. 479847 |    | 0. 510420572 | NA           |
| 129. 5494 | 175. 5764 | 175. 0085 | 0. 316597 |    | 0. 407216733 | 0. 370646519 |
| 2972. 489 | 2726. 544 | 2903. 883 | -0. 05503 |    | 0. 001564335 | 0. 727163127 |
| 1. 786889 | 0. 928976 | 8. 383639 | 3. 075166 | NA | NA           |              |
| 1039. 076 | 999. 5779 | 1087. 777 | 0. 007647 |    | 0. 642006987 | 0. 969852341 |
| 859. 4934 | 942. 9104 | 937. 9196 | -0. 08095 |    | 0. 174380645 | 0. 702604821 |
| 954. 1985 | 998. 6489 | 712. 6093 | 0. 198749 |    | 0. 365953812 | 0. 420675433 |
| 275. 1808 | 227. 5991 | 306. 0028 | -0. 34248 |    | 0. 380570392 | 0. 198030129 |
| 3. 573777 | 4. 644879 | 17. 81523 | -0. 24127 |    | 0. 935506037 | NA           |
| 1242. 781 | 1299. 637 | 1161. 134 | 0. 082684 |    | 0. 022968717 | 0. 696921855 |
| 0         | 0         | 0         | #NUM!     | NA | NA           |              |
| 301. 9842 | 344. 65   | 283. 9958 | -0. 12096 |    | 0. 760924499 | 0. 663320474 |
| 15. 18855 | 11. 14771 | 30. 39069 | -0. 02311 |    | 0. 872444605 | NA           |
| 144. 738  | 124. 4828 | 105. 8434 | -0. 14027 |    | 0. 50823828  | 0. 786995178 |
| 2. 680333 | 5. 573855 | 0         | 0. 933955 | NA | NA           |              |
| 0         | 0         | 0         | #NUM!     | NA | NA           |              |
| 2590. 988 | 2469. 218 | 2554. 914 | -0. 06592 |    | 0. 92288341  | 0. 721425275 |
| 0. 893444 | 3. 715903 | 3. 143865 | 0. 082194 | NA | NA           |              |
| 186. 7298 | 192. 298  | 134. 1382 | 0. 7098   |    | 0. 907472172 | 0. 119008343 |
| 274. 2874 | 310. 2779 | 337. 4415 | -0. 17365 |    | 0. 237605221 | 0. 549352823 |

|          |          |          |             |             |             |
|----------|----------|----------|-------------|-------------|-------------|
| 1398.24  | 1363.736 | 1384.348 | -0.13382    | 0.330052034 | 0.389216061 |
| 1029.248 | 932.6917 | 1089.873 | 0.532508    | 0.033904641 | 0.016996857 |
| 70.5821  | 51.09367 | 73.35684 | 0.068142    | 0.71034712  | 0.948574402 |
| 137.5904 | 135.6305 | 143.5698 | 0.166554    | 0.798030968 | 0.739117108 |
| 646.8536 | 749.6834 | 565.8956 | 0.101968    | 0.785492922 | 0.752941037 |
| 0.893444 | 0        | 0        | #DIV/0! NA  | NA          |             |
| 16.97544 | 21.36644 | 6.287729 | 0.438816    | 0.997889853 | NA          |
| 612.9028 | 649.3541 | 500.9224 | 0.1854      | 0.250094568 | 0.527767428 |
| 0        | 1.857952 | 2.09591  | -1.67116 NA | NA          |             |
| 354.6974 | 362.3005 | 358.4006 | 0.302202    | 0.294050379 | 0.175074667 |
| 889.8705 | 882.527  | 971.4542 | 0.149734    | 0.812875146 | 0.552800466 |
| 388.6483 | 458.914  | 448.5247 | -0.22753    | 5.99679E-07 | 0.403397484 |
| 321.6399 | 337.2182 | 335.3456 | 0.329265    | 0.897766774 | 0.205984307 |
| 521.7714 | 487.7123 | 448.5247 | -0.07468    | 0.143621832 | 0.790388906 |
| 1674.315 | 1589.478 | 1799.339 | -0.01963    | 0.36585589  | 0.921976304 |
| 8.934443 | 4.644879 | 14.67137 | 0.115167    | 0.824080056 | NA          |
| 141.1642 | 180.2213 | 146.7137 | 0.001634    | 0.108921558 | 0.999877981 |
| 403.8368 | 405.9624 | 438.0451 | -0.00234    | 0.530486695 | 0.996180974 |
| 1.786889 | 3.715903 | 3.143865 | 1.129923 NA | NA          |             |
| 171.5413 | 139.3464 | 151.9535 | 0.065527    | 0.335983122 | 0.873067467 |
| 0.893444 | 0.928976 | 5.239774 | #DIV/0! NA  | NA          |             |
| 110.7871 | 150.4941 | 101.6516 | 0.287363    | 0.424996881 | 0.502996806 |
| 1372.33  | 1242.97  | 1357.102 | -0.22493    | 0.992511525 | 0.159540184 |
| 718.3292 | 752.4704 | 587.9027 | 0.152326    | 0.934132954 | 0.536590083 |
| 3339.695 | 3355.46  | 3224.557 | 0.140682    | 0.072881149 | 0.256269459 |
| 2164.815 | 2141.289 | 1977.491 | 0.283533    | 0.507862868 | 0.102175745 |
| 2117.463 | 1935.057 | 2011.025 | 0.182643    | 0.28025041  | 0.27042216  |
| 0.893444 | 0.928976 | 0        | -1.80685 NA | NA          |             |
| 37.52466 | 40.87493 | 41.9182  | 0.507681    | 0.841901206 | 0.406585578 |
| 3704.22  | 3508.741 | 4194.963 | -0.37468    | 0.43802737  | 0.010034507 |
| 1771.7   | 1754.835 | 1779.427 | 0.400465    | 0.378509673 | 0.001906013 |
| 1105.191 | 1126.848 | 1103.497 | 0.184472    | 0.248869679 | 0.167165088 |
| 805.8867 | 839.7941 | 953.639  | 0.125174    | 0.785492922 | 0.562726251 |
| 87.55754 | 82.67884 | 120.5148 | -0.55325    | 0.58195463  | 0.168553612 |
| 1778.848 | 1798.497 | 1718.646 | -0.04138    | 0.986125936 | 0.861226913 |
| 48687.35 | 46775.79 | 50854.11 | -0.04287    | 0.24779362  | 0.835596295 |
| 2251.48  | 2131.999 | 2268.822 | -0.07253    | 0.289945869 | 0.652302842 |
| 303.771  | 200.6588 | 298.6671 | 0.217874    | 0.215286681 | 0.690294956 |
| 209.9594 | 203.4457 | 222.1664 | -0.09556    | 0.136084466 | 0.834332496 |
| 20.54922 | 15.79259 | 12.57546 | 0.256847    | 0.582207349 | NA          |
| 340.4023 | 308.42   | 418.134  | -0.18557    | 0.173157428 | 0.553486024 |
| 1463.462 | 1463.137 | 1451.418 | 0.027393    | 0.614621507 | 0.87433787  |
| 617.37   | 595.4735 | 579.5191 | -0.15474    | 0.000316132 | 0.675625717 |
| 671.8701 | 619.6268 | 555.4161 | 0.343967    | 0.666720621 | 0.203537925 |
| 469.9517 | 463.5589 | 457.9563 | -0.05611    | 0.871208906 | 0.818055883 |
| 12591.31 | 11911.33 | 12932.81 | -0.37067    | 0.827268091 | 0.005669712 |
| 1039.969 | 1010.726 | 1123.408 | -0.09226    | 0.576058796 | 0.737803127 |
| 2767.89  | 2998.734 | 2722.587 | -0.00709    | 0.937354907 | 0.979395135 |
| 3185.129 | 3231.907 | 3334.592 | -0.10516    | 0.950686887 | 0.402824474 |
| 1010.485 | 1156.575 | 1072.058 | 0.038064    | 0.904997879 | 0.875604624 |
| 0        | 1.857952 | 0        | 0.496456 NA | NA          |             |
| 1849.43  | 1572.756 | 1583.46  | 0.110769    | 0.350490225 | 0.673302041 |
| 761.2145 | 733.8909 | 662.3075 | -0.01767    | 0.360714981 | 0.95937982  |
| 711.1816 | 676.2944 | 622.4852 | 0.206492    | 0.30299466  | 0.402165869 |

|           |           |           |           |              |    |              |
|-----------|-----------|-----------|-----------|--------------|----|--------------|
| 3. 573777 | 2. 786927 | 4. 19182  | 0. 031131 | NA           |    |              |
| 705. 821  | 631. 7035 | 647. 6361 | 0. 183097 | 0. 243547924 |    | 0. 576591259 |
| 221. 5742 | 310. 2779 | 358. 4006 | -0. 2903  | 0. 524823502 |    | 0. 359566588 |
| 225. 148  | 183. 9372 | 215. 8787 | -0. 22344 | 0. 485974888 |    | 0. 422560599 |
| 0. 893444 | 0         | 2. 09591  | -0. 75909 | NA           |    |              |
| 2628. 513 | 2602. 061 | 2478. 413 | 0. 134791 | 0. 004040821 |    | 0. 365253762 |
| 2242. 545 | 2235. 116 | 2123. 157 | 0. 105842 | 0. 155062297 |    | 0. 672204533 |
| 0         | 1. 857952 | 4. 19182  | #DIV/0!   | NA           |    |              |
| 292. 1563 | 271. 2609 | 238. 9337 | 0. 143068 | 0. 062616413 |    | 0. 578237014 |
| 342. 1892 | 405. 0334 | 439. 0931 | -0. 46715 | 0. 108410382 |    | 0. 040784938 |
| 2. 680333 | 1. 857952 | 2. 09591  | 1. 975961 | NA           |    |              |
| 810. 3539 | 910. 3962 | 905. 433  | 0. 085937 | 0. 989820945 |    | 0. 690294956 |
| 109. 0002 | 81. 74987 | 106. 8914 | -0. 29991 | 0. 172771811 |    | 0. 457211032 |
| 8. 934443 | 7. 431806 | 3. 143865 | 0. 040647 | 0. 904254847 | NA |              |
| 156142. 8 | 149439. 7 | 153508. 6 | -0. 13115 | 0. 862400346 |    | 0. 370304803 |
| 1353. 568 | 1318. 217 | 1208. 292 | 0. 134826 | 0. 483401265 |    | 0. 567139643 |
| 1378. 584 | 1348. 873 | 1352. 91  | -0. 21127 | 0. 535057938 |    | 0. 089456731 |
| 320. 7465 | 333. 5023 | 315. 4344 | -0. 19372 | 0. 579980685 |    | 0. 472793604 |
| 1939. 667 | 1969. 429 | 1854. 88  | 0. 060121 | 0. 182617755 |    | 0. 746837826 |
| 2082. 619 | 2074. 403 | 2282. 446 | 0. 277111 | 0. 279012259 |    | 0. 025118017 |
| 2934. 071 | 2908. 623 | 2710. 011 | 0. 088972 | 0. 009784878 |    | 0. 711465473 |
| 28. 59022 | 36. 23005 | 22. 00705 | -0. 52722 | 0. 699040789 | NA |              |
| 14. 29511 | 11. 14771 | 17. 81523 | 0. 628658 | 0. 993190072 | NA |              |
| 775. 5096 | 718. 0983 | 698. 9859 | 0. 152856 | 0. 552781792 |    | 0. 515558505 |
| 169. 7544 | 154. 21   | 159. 2891 | 0. 116154 | 0. 327964932 |    | 0. 752110266 |
| 45. 56566 | 44. 59084 | 33. 53456 | -0. 35531 | 0. 888097311 |    | 0. 578237014 |
| 802. 3129 | 770. 1209 | 735. 6643 | 0. 167265 | 0. 544035793 |    | 0. 578896646 |
| 2964. 448 | 2969. 936 | 2582. 161 | 0. 074372 | 0. 136655574 |    | 0. 690106308 |
| 637. 0258 | 600. 1183 | 564. 8477 | 0. 358309 | 0. 179898822 |    | 0. 251815507 |
| 2803. 628 | 2836. 163 | 2801. 183 | 0. 275245 | 0. 187777748 |    | 0. 076809757 |
| 783. 5506 | 712. 5244 | 620. 3893 | 0. 132509 | 0. 720425175 |    | 0. 566028914 |
| 1041. 756 | 963. 3479 | 931. 6319 | 0. 314027 | 0. 674403807 |    | 0. 027833357 |
| 0         | 0         | 0         | #DIV/0!   | NA           |    |              |
| 1782. 421 | 1947. 133 | 1800. 387 | -0. 02228 | 0. 011540931 |    | 0. 914553818 |
| 0         | 0         | 0         | #DIV/0!   | NA           |    |              |
| 0         | 0         | 0         | #DIV/0!   | NA           |    |              |
| 0         | 0         | 0         | #DIV/0!   | NA           |    |              |
| 0         | 0         | 0         | #DIV/0!   | NA           |    |              |
| 0         | 0         | 0         | #DIV/0!   | NA           |    |              |
| 31. 27055 | 17. 65054 | 26. 19887 | 0. 03249  | 0. 669860929 | NA |              |
| 3556. 802 | 3526. 392 | 4018. 907 | 0. 06452  | 0. 948223269 |    | 0. 755018053 |
| 290. 3694 | 257. 3263 | 308. 0987 | 0. 023965 | 0. 390161167 |    | 0. 928702649 |
| 2811. 669 | 2882. 612 | 2890. 26  | -0. 0071  | 0. 001496948 |    | 0. 972140885 |
| 551. 2551 | 575. 965  | 562. 7518 | 0. 137535 | 0. 690152662 |    | 0. 489096476 |
| 16749. 4  | 16822. 82 | 16589. 13 | -0. 25942 | 0. 606270396 |    | 0. 029788115 |
| 566. 4437 | 474. 7066 | 484. 1552 | 0. 073517 | 0. 957996061 |    | 0. 79934904  |
| 886. 2967 | 995. 862  | 804. 8294 | 0. 209648 | 0. 997568936 |    | 0. 333065318 |
| 9. 827887 | 8. 360782 | 11. 5275  | -0. 53294 | 0. 803730942 | NA |              |
| 281. 4349 | 222. 0252 | 287. 1396 | -0. 20684 | 0. 812875146 |    | 0. 532286968 |
| 623. 6241 | 590. 8286 | 679. 0748 | 0. 369077 | 0. 735300868 |    | 0. 161154644 |
| 337. 7219 | 365. 0875 | 398. 2229 | -0. 21119 | 0. 701861094 |    | 0. 394022844 |
| 563. 7633 | 541. 5929 | 517. 6897 | -0. 32658 | 0. 462276826 |    | 0. 048893739 |
| 3110. 973 | 2887. 257 | 3265. 427 | -0. 05256 | 0. 981711158 |    | 0. 818645356 |
| 1053. 371 | 945. 6973 | 912. 7687 | 0. 304767 | 0. 91014027  |    | 0. 059410136 |

|          |          |          |             |                |             |
|----------|----------|----------|-------------|----------------|-------------|
| 249.2709 | 238.7468 | 343.7292 | -0.33194    | 0.549071806    | 0.256199693 |
| 2739.3   | 2825.015 | 2665.997 | 0.017616    | 0.458486853    | 0.924154584 |
| 51.81977 | 42.73289 | 56.58956 | -0.15557    | 0.757469981    | 0.864252513 |
| 5314.206 | 5261.719 | 6107.481 | 0.489691    | 0.847983366    | 0.13275794  |
| 759.4276 | 736.6778 | 727.2807 | -0.01783    | 0.977332424    | 0.952680272 |
| 835.3704 | 698.5898 | 803.7814 | 0.109328    | 0.936346196    | 0.663320474 |
| 27503.79 | 26573.35 | 28788.37 | -0.29847    | 0.495011768    | 0.010351567 |
| 5624.232 | 5524.619 | 6186.078 | -0.24539    | 0.883354954    | 0.084073915 |
| 1607.306 | 1548.603 | 1560.405 | -0.22194    | 0.786928941    | 0.129766751 |
| 0        | 1.857952 | 0        | -0.50354 NA | NA             |             |
| 24.12299 | 10.21873 | 23.05501 | 0.254848    | 0.935731617 NA |             |
| 922.0345 | 991.2171 | 1043.763 | -0.20698    | 0.837529432    | 0.303824089 |
| 1830.667 | 1823.579 | 2239.48  | -0.24829    | 0.918350023    | 0.184072788 |
| 641.493  | 658.6438 | 607.8138 | -0.09533    | 0.972861407    | 0.693303686 |
| 1141.822 | 1127.777 | 1016.516 | -0.09382    | 0.730407446    | 0.612005134 |
| 15.18855 | 13.93464 | 22.00705 | 0.549596    | 0.716063981 NA |             |
| 4.467221 | 3.715903 | 7.335684 | 0.369341 NA | NA             |             |
| 89456.11 | 87385.96 | 85233.32 | -0.14661    | 0.506703303    | 0.198106267 |
| 645.0668 | 691.158  | 754.5275 | -0.0314     | 0.888097311    | 0.914772543 |
| 5209.673 | 5383.415 | 5453.557 | -0.14671    | 0.987797193    | 0.143013287 |
| 1010.485 | 1057.174 | 1036.427 | -0.01284    | 0.989297532    | 0.964974564 |
| 3.573777 | 0        | 3.143865 | -0.04998 NA | NA             |             |
| 8611.016 | 8453.679 | 9950.332 | -0.20305    | 0.901380807    | 0.251743462 |
| 1898.569 | 1841.23  | 2009.977 | 0.031389    | 0.836962769    | 0.896670492 |
| 1106.977 | 1257.833 | 1091.969 | 0.061713    | 0.881060269    | 0.762276725 |
| 5465.199 | 5380.628 | 4642.44  | 0.006282    | 0.705615772    | 0.984451848 |
| 475.3123 | 440.3345 | 468.4358 | 0.0113      | 0.64485916     | 0.961026715 |
| 335.935  | 376.2352 | 264.0846 | -0.008      | 0.92288341     | 0.992528568 |
| 10.72133 | 27.86927 | 25.15092 | -0.02176    | 0.526561206 NA |             |
| 615.5831 | 608.4791 | 468.4358 | -0.09364    | 0.901132408    | 0.748344041 |
| 3.573777 | 0        | 2.09591  | #DIV/0! NA  | NA             |             |
| 363.6318 | 406.8914 | 399.2708 | -0.20325    | 0.166831969    | 0.386029809 |
| 8616.376 | 8907.949 | 9259.729 | -0.26451    | 0.724579185    | 0.049190168 |
| 42.88532 | 41.80391 | 48.20593 | -0.18891    | 0.031433       | 0.782080618 |
| 460.1238 | 450.5532 | 473.6756 | 0.067329    | 0.572336545    | 0.791888862 |
| 5336.543 | 5143.739 | 4857.271 | 0.044907    | 0.37602059     | 0.814809717 |
| 36183.6  | 35168.24 | 34768    | -0.32973    | 0.758097373    | 0.023440007 |
| 1156.117 | 1124.061 | 1014.42  | 0.361461    | 0.618280897    | 0.03394343  |
| 22.33611 | 13.93464 | 27.24683 | 0.454018    | 0.987797193 NA |             |
| 856.813  | 970.7797 | 898.0973 | 0.026892    | 0.960823113    | 0.924920797 |
| 236.7627 | 248.9655 | 299.7151 | -0.12625    | 0.92660939     | 0.659308719 |
| 456.55   | 525.8003 | 478.9154 | 0.191327    | 0.759261525    | 0.365253762 |
| 1798.503 | 1904.4   | 2005.786 | -0.2855     | 0.812356506    | 0.276791768 |
| 47022.86 | 46915.13 | 47457.69 | -0.28223    | 0.862447485    | 0.043763037 |
| 264.4595 | 220.1673 | 164.5289 | 0.276317    | 0.766253365    | 0.494999963 |
| 1439.339 | 1362.807 | 1340.334 | 0.13171     | 0.491451873    | 0.399848949 |
| 70.5821  | 52.02264 | 80.69253 | -0.33507    | 0.918350023    | 0.462481429 |
| 1821.733 | 1775.273 | 1459.801 | 0.222588    | 0.337335124    | 0.359566588 |
| 577.165  | 513.7236 | 512.4499 | -0.16       | 0.158766689    | 0.43593104  |
| 103.6395 | 105.9032 | 115.275  | -0.30124    | 0.484953599    | 0.503886247 |
| 1306.216 | 1288.489 | 1263.834 | 0.053083    | 0.337709829    | 0.749984274 |
| 1.786889 | 0        | 1.047955 | 0.106012 NA | NA             |             |
| 32818.89 | 33199.74 | 32748.59 | -0.17301    | 0.41136268     | 0.113154692 |
| 1014.059 | 980.0694 | 922.2003 | -0.33731    | 0.246058895    | 0.017778808 |

|          |          |          |             |                |             |
|----------|----------|----------|-------------|----------------|-------------|
| 420.8122 | 475.6356 | 347.921  | 0.306784    | 0.847410002    | 0.197029258 |
| 102.7461 | 134.7015 | 169.7687 | -0.11951    | 0.856505841    | 0.791888862 |
| 34.84433 | 27.86927 | 33.53456 | -0.33367    | 0.946357028    | 0.603217016 |
| 3543.4   | 3753.062 | 3892.104 | -0.19368    | 0.836962769    | 0.207006031 |
| 1168.625 | 1105.481 | 1108.736 | 0.111092    | 0.014083611    | 0.614824771 |
| 1177.56  | 961.4899 | 1229.251 | 0.252896    | 0.105557831    | 0.361214706 |
| 0.893444 | 2.786927 | 2.09591  | 0.41897 NA  | NA             |             |
| 4535.123 | 4632.802 | 4271.464 | 0.0176      | 0.035767958    | 0.914553818 |
| 165.2872 | 220.1673 | 282.9478 | -0.14715    | 0.58195463     | 0.767583474 |
| 356.4843 | 290.7694 | 344.7772 | -0.12971    | 0.402196969    | 0.690294956 |
| 301.9842 | 353.0108 | 333.2497 | -0.11677    | 0.755224646    | 0.737751404 |
| 4.467221 | 16.72156 | 25.15092 | 0.310831    | 0.870174956 NA |             |
| 736.1981 | 642.8512 | 767.103  | -0.00633    | 0.988569159    | 0.990023409 |
| 420.8122 | 523.0134 | 374.1199 | 0.198689    | 0.842806932    | 0.422560599 |
| 1036.395 | 996.791  | 1072.058 | 0.05079     | 0.941466278    | 0.823966789 |
| 2.680333 | 3.715903 | 3.143865 | 1.024468 NA | NA             |             |
| 270.7136 | 290.7694 | 227.4062 | -0.03083    | 0.769710962    | 0.924895748 |
| 181379.9 | 177768.8 | 190230   | -0.32261    | 0.903964934    | 0.000452251 |
| 316.2793 | 265.6871 | 241.0296 | 0.59876     | 0.972861407    | 0.045848266 |
| 167.9675 | 126.3407 | 134.1382 | -0.22475    | 0.733488302    | 0.551771495 |
| 964.9198 | 934.5496 | 741.9521 | 0.228432    | 0.14394509     | 0.453163355 |
| 394.0089 | 498.86   | 472.6277 | -0.12165    | 0.828016939    | 0.694075461 |
| 294.8366 | 254.5394 | 229.5021 | 0.392961    | 0.811082292    | 0.168910143 |
| 417.2385 | 424.5419 | 500.9224 | -0.12189    | 0.866564571    | 0.621297414 |
| 5.360666 | 3.715903 | 6.287729 | 0.997916 NA | NA             |             |
| 0        | 1.857952 | 0        | -0.50354 NA | NA             |             |
| 36707.16 | 36429.78 | 36780.07 | -0.33372    | 0.709468629    | 0.011978719 |
| 1.786889 | 1.857952 | 0        | -1.33876 NA | NA             |             |
| 1588.544 | 1607.128 | 1904.134 | 0.089121    | 0.938838346    | 0.744396459 |
| 1185.601 | 1112.913 | 1134.935 | 0.145915    | 0.795376015    | 0.297698909 |
| 94.70509 | 80.82089 | 133.0903 | -0.08462    | 0.023209184    | 0.889287206 |
| 9.827887 | 4.644879 | 19.91114 | -0.52664    | 0.920564616 NA |             |
| 94.70509 | 79.89192 | 83.83639 | -0.35481    | 0.817609984    | 0.536657785 |
| 1858.364 | 1934.128 | 2127.348 | -0.05251    | 0.536133458    | 0.840718213 |
| 3.573777 | 1.857952 | 8.383639 | 0.369112 NA | NA             |             |
| 891.6574 | 781.2686 | 781.7744 | 0.189801    | 0.98878626     | 0.292831789 |
| 425.2795 | 536.019  | 434.9013 | 0.231699    | 0.491534977    | 0.327516537 |
| 905.059  | 917.8281 | 707.3696 | 0.27714     | 0.256943324    | 0.220509545 |
| 1693.077 | 1776.202 | 1671.488 | 0.007319    | 0.835449534    | 0.975879427 |
| 529.8124 | 516.5105 | 491.4908 | 0.145209    | 0.879847555    | 0.56624122  |
| 1479.544 | 1478.929 | 1479.712 | 0.043939    | 0.178803574    | 0.87466351  |
| 827.3294 | 834.2202 | 748.2398 | 0.303779    | 0.428811885    | 0.028065868 |
| 1989.7   | 2162.656 | 2095.91  | -0.18094    | 0.868137167    | 0.194519967 |
| 2696.415 | 2538.891 | 3155.392 | 0.170904    | 0.831470267    | 0.422560599 |
| 432.427  | 452.4112 | 467.3879 | -0.19876    | 0.87547961     | 0.372138887 |
| 2442.677 | 2117.136 | 2277.206 | -0.08644    | 0.79502649     | 0.615745925 |
| 1490.265 | 1487.29  | 1693.495 | -0.32186    | 0.763001611    | 0.109807224 |
| 150.9921 | 183.0082 | 246.2694 | -0.437      | 0.306599955    | 0.098435777 |
| 642.3864 | 640.0643 | 763.9591 | 0.156855    | 0.637016749    | 0.43545502  |
| 4113.417 | 4314.163 | 4179.244 | -0.16829    | 0.899911835    | 0.150320193 |
| 3708.687 | 3579.344 | 4369.972 | -0.05574    | 0.435014967    | 0.838085776 |
| 1619.814 | 1569.969 | 1467.137 | -0.02975    | 0.132284706    | 0.889915228 |
| 8425.179 | 8097.882 | 8449.66  | -0.01503    | 0.668522148    | 0.923725803 |
| 1207.043 | 1371.168 | 1415.787 | -0.0556     | 0.497263297    | 0.819004    |

|          |          |          |          |             |             |
|----------|----------|----------|----------|-------------|-------------|
| 452.0828 | 437.5476 | 580.567  | -0.08393 | 0.15584882  | 0.765789524 |
| 1036.395 | 1080.399 | 1153.798 | -0.43631 | 0.371004931 | 0.000188607 |
| 1232.06  | 1357.234 | 1444.082 | 0.342025 | 0.935100162 | 0.084617521 |
| 6446.2   | 6423.867 | 8084.972 | 0.573031 | 0.833159137 | 9.80382E-05 |
| 0        | 0        | 0        | #NUM!    | NA          | NA          |
| 0        | 0        | 0        | #NUM!    | NA          | NA          |
| 0        | 0        | 0        | #NUM!    | NA          | NA          |
| 0        | 0        | 0        | #NUM!    | NA          | NA          |
| 8.934443 | 8.360782 | 3.143865 | 0.616581 | NA          | NA          |
| 792.4851 | 723.6721 | 748.2398 | -0.23381 | 0.221789876 | 0.278856737 |
| 1664.487 | 2006.588 | 1859.072 | -0.22269 | 0.257353068 | 0.159445896 |
| 523.5583 | 625.2007 | 706.3216 | 0.114964 | 0.228243156 | 0.696002785 |
| 0        | 0        | 0        | #NUM!    | NA          | NA          |
| 0        | 0        | 0        | #NUM!    | NA          | NA          |
| 0        | 0        | 0        | #NUM!    | NA          | NA          |
| 0        | 0        | 0        | #NUM!    | NA          | NA          |
| 0        | 0        | 0        | #NUM!    | NA          | NA          |
| 0        | 0        | 0        | #NUM!    | NA          | NA          |
| 736.1981 | 684.6551 | 696.89   | -0.5758  | 0.302288037 | 0.000125515 |
| 810.3539 | 859.3026 | 824.7405 | -0.0256  | 0.899176451 | 0.941596912 |
| 14.29511 | 5.573855 | 3.143865 | 0.032412 | 0.960823113 | NA          |
| 458.3369 | 480.2805 | 554.3681 | 0.508243 | 0.671382026 | 0.001957111 |
| 6.25411  | 11.14771 | 9.431594 | 0.02941  | 0.872688807 | NA          |
| 483.3533 | 526.7293 | 487.299  | -0.00021 | 0.947037414 | 0.990142758 |
| 1689.503 | 1782.704 | 1832.873 | -0.02655 | 0.046345161 | 0.886786965 |
| 1594.798 | 1590.407 | 1752.181 | 0.047398 | 0.804201321 | 0.818055883 |
| 27700.35 | 27070.35 | 27923.81 | -0.29672 | 0.711342547 | 0.030380867 |
| 1029.248 | 1086.902 | 980.8858 | -0.2729  | 0.311277227 | 0.053703999 |
| 1573.355 | 1459.421 | 1361.293 | 0.171403 | 0.46334755  | 0.292023088 |
| 147.4183 | 148.6361 | 151.9535 | 0.128218 | 0.730204074 | 0.807576186 |
| 89.34443 | 96.61348 | 80.69253 | 0.089653 | 0.804201321 | 0.889915228 |
| 740.6653 | 771.0499 | 727.2807 | 0.259774 | 0.969447004 | 0.292831789 |
| 478.8861 | 533.2321 | 470.5317 | -0.35556 | 0.300155248 | 0.06712239  |
| 0        | 0        | 0        | #NUM!    | NA          | NA          |
| 1842.282 | 1683.304 | 1713.406 | 0.142809 | 0.079835741 | 0.359983511 |
| 0        | 2.786927 | 1.047955 | #DIV/0!  | NA          | NA          |
| 0.893444 | 0.928976 | 0        | -1.24532 | NA          | NA          |
| 124.1888 | 131.9146 | 155.0973 | 0.233669 | 0.604042936 | 0.563375937 |
| 1737.749 | 1570.898 | 1926.141 | 0.096962 | 0.940848107 | 0.632121198 |
| 0        | 0        | 2.09591  | -1.16196 | NA          | NA          |
| 627.1979 | 747.8255 | 783.8703 | 0.144642 | 0.548339498 | 0.627256877 |
| 1.786889 | 1.857952 | 3.143865 | -0.52213 | NA          | NA          |
| 5482.174 | 5140.952 | 5414.783 | -0.10011 | 0.6346531   | 0.41069386  |
| 8747.713 | 8900.517 | 10952.18 | -0.63315 | 0.872444605 | 3.97861E-05 |
| 62.5411  | 58.52547 | 42.96615 | 0.035766 | 0.831799154 | 0.967817837 |
| 900.5918 | 909.4673 | 700.0339 | 0.070684 | 0.542904501 | 0.82871401  |
| 1005.125 | 1085.973 | 1200.956 | -0.15653 | 0.453640482 | 0.463635155 |
| 4458.287 | 4636.518 | 4984.073 | -0.27863 | 0.717935188 | 0.031877471 |
| 280.5415 | 313.9938 | 267.2285 | 0.06654  | 0.475821599 | 0.84162581  |
| 276.9677 | 230.386  | 280.8519 | -0.11818 | 0.430461737 | 0.709201387 |
| 10.72133 | 8.360782 | 2.09591  | -1.06514 | 0.935100162 | NA          |
| 5.360666 | 2.786927 | 0        | -2.01263 | NA          | NA          |
| 6514.996 | 5912.002 | 6229.044 | 0.090116 | 0.658567464 | 0.48354547  |
| 3.573777 | 0        | 0        | #DIV/0!  | NA          | NA          |

|          |          |          |             |                |             |
|----------|----------|----------|-------------|----------------|-------------|
| 209.066  | 297.2722 | 312.2906 | -0.13403    | 0.734526609    | 0.72003423  |
| 2222.889 | 2023.309 | 2200.705 | -0.11932    | 0.913769516    | 0.40615036  |
| 38.4181  | 26.01132 | 31.43865 | -0.32305    | 0.918350023    | 0.658487105 |
| 316.2793 | 330.7154 | 328.0099 | -0.3229     | 0.04906058     | 0.224319643 |
| 1915.544 | 1962.926 | 2231.096 | -0.37123    | 0.504924333    | 0.006271401 |
| 6947.423 | 6582.722 | 7581.954 | 0.236056    | 0.960956671    | 0.208056675 |
| 236.7627 | 249.8945 | 309.1467 | -0.26814    | 0.927256678    | 0.317595626 |
| 8.934443 | 7.431806 | 4.19182  | 1.964376 NA | NA             |             |
| 555.7223 | 584.3258 | 644.4923 | 0.07436     | 0.759261525    | 0.808870475 |
| 2536.488 | 2427.414 | 3096.707 | -0.22649    | 0.082930432    | 0.295310061 |
| 546.7879 | 706.0216 | 579.5191 | -0.1962     | 0.587719544    | 0.422560599 |
| 1911.077 | 2041.889 | 1986.922 | -0.0448     | 0.883354954    | 0.855100406 |
| 13.40166 | 24.15337 | 14.67137 | -0.12783    | 0.820929887 NA |             |
| 29.48366 | 13.00566 | 14.67137 | 0.18991     | 0.579415204 NA |             |
| 320.7465 | 238.7468 | 310.1946 | -0.0759     | 0.938838346    | 0.859552774 |
| 1406.281 | 1353.518 | 1358.15  | 0.192139    | 0.727531507    | 0.112687221 |
| 2482.882 | 2590.913 | 2755.073 | -0.03976    | 0.80037736     | 0.81253834  |
| 35.73777 | 30.6562  | 30.39069 | -0.30738    | 0.40292054 NA  |             |
| 58.96732 | 71.53113 | 59.73343 | -0.04009    | 0.98409529     | 0.962321489 |
| 1069.453 | 1184.444 | 889.7137 | 0.250576    | 0.362090257    | 0.433694723 |
| 6.25411  | 13.00566 | 8.383639 | -0.72303    | 0.880489034 NA |             |
| 173.3282 | 185.7952 | 225.3103 | 0.177308    | 0.641408722    | 0.640053604 |
| 1567.101 | 1522.591 | 1572.98  | -0.05673    | 0.034815958    | 0.712929046 |
| 439.5746 | 460.772  | 462.1481 | 0.078458    | 0.377099016    | 0.751258336 |
| 1666.274 | 1746.474 | 1696.639 | 0.181202    | 0.29215357     | 0.172785623 |
| 1790.462 | 1571.827 | 1620.138 | 0.366346    | 0.668508083    | 0.028626623 |
| 7.147554 | 4.644879 | 0        | -1.08262 NA | NA             |             |
| 1485.798 | 1527.236 | 1586.604 | -0.16231    | 0.923053858    | 0.248501551 |
| 2878.677 | 2821.299 | 2647.134 | 0.260096    | 0.107676441    | 0.181593979 |
| 4.467221 | 8.360782 | 8.383639 | -0.44751    | 0.774045793 NA |             |
| 2890.292 | 2869.606 | 2723.635 | -0.10252    | 0.100000333    | 0.442655501 |
| 259.0988 | 224.8121 | 290.2835 | 0.346324    | 0.730204291    | 0.284997366 |
| 473.5255 | 445.9084 | 398.2229 | -0.12213    | 0.732779178    | 0.596761405 |
| 2146.947 | 2082.764 | 1978.539 | -0.11475    | 0.022055853    | 0.3930505   |
| 18270.04 | 18109.45 | 19192.25 | -0.43315    | 0.794232621    | 0.000984217 |
| 2297.939 | 2171.016 | 2117.917 | 0.052463    | 0.034700814    | 0.814086627 |
| 838.9442 | 755.2573 | 970.4062 | 0.066296    | 0.652050398    | 0.771436828 |
| 2500.75  | 2550.967 | 2653.422 | -0.14692    | 0.325126896    | 0.380129121 |
| 476.2058 | 427.3289 | 469.4838 | 0.146757    | 0.368034878    | 0.55088846  |
| 544.1076 | 533.2321 | 540.7447 | -0.02666    | 0.919799198    | 0.923725803 |
| 248.3775 | 256.3973 | 243.1255 | -0.23329    | 0.592795512    | 0.414929365 |
| 597.7142 | 565.7462 | 454.8124 | 0.169914    | 0.184818229    | 0.605438344 |
| 0        | 0.928976 | 0        | #DIV/0! NA  | NA             |             |
| 7202.054 | 7189.343 | 7980.177 | -0.16615    | 0.859167103    | 0.224223422 |
| 0        | 0.928976 | 1.047955 | -3.20111 NA | NA             |             |
| 1374.117 | 1286.631 | 1191.525 | 0.022068    | 0.600467264    | 0.923910484 |
| 20893.19 | 20190.36 | 22921.92 | -0.44262    | 0.787835013    | 0.000914912 |
| 0        | 1.857952 | 2.09591  | -1.35566 NA | NA             |             |
| 712.0751 | 739.4647 | 675.9309 | 0.346744    | 0.730441275    | 0.131442568 |
| 630.7716 | 653.9989 | 528.1693 | 0.026014    | 0.655321049    | 0.94960537  |
| 130.4429 | 141.2043 | 173.9605 | -0.47302    | 0.444234906    | 0.110387265 |
| 22.33611 | 26.9403  | 20.9591  | 0.32789     | 0.66963368 NA  |             |
| 891.6574 | 1020.015 | 901.2412 | -0.03587    | 0.005036606    | 0.882926075 |
| 499.4353 | 510.9367 | 471.5797 | -0.03735    | 0.714180196    | 0.893531532 |



|          |          |          |          |             |             |
|----------|----------|----------|----------|-------------|-------------|
| 54.5001  | 101.2584 | 97.45981 | 0.248211 | 0.30299466  | 0.658487105 |
| 1689.503 | 1631.281 | 1847.544 | -0.24847 | 0.434274199 | 0.093593    |
| 8.934443 | 15.79259 | 11.5275  | 0.712017 | 0.862400346 | NA          |
| 425.2795 | 428.2578 | 397.1749 | 0.186398 | 0.068025474 | 0.36518668  |
| 558.4027 | 529.5162 | 563.7997 | 0.226582 | 0.901132408 | 0.362764905 |
| 2337.25  | 2242.547 | 2260.439 | -0.12729 | 0.007079262 | 0.348491003 |
| 353.8039 | 330.7154 | 280.8519 | 0.202252 | 0.914186189 | 0.535992604 |
| 1947.708 | 1877.46  | 2026.745 | -0.01667 | 0.813154117 | 0.936747437 |
| 444.9352 | 543.4508 | 596.2863 | -0.03698 | 0.16161829  | 0.908612163 |
| 962.2395 | 923.4019 | 839.4119 | 0.17259  | 0.802750793 | 0.316260034 |
| 13489.22 | 13159.87 | 13041.8  | -0.10568 | 0.025591463 | 0.253027668 |
| 828.2228 | 787.7714 | 915.9126 | 0.063658 | 0.18468856  | 0.800895715 |
| 56480.87 | 56184.45 | 56331.77 | -0.25761 | 0.92288341  | 0.034382552 |
| 807.6736 | 771.0499 | 833.1241 | -0.08574 | 0.757209202 | 0.719971458 |
| 252.8447 | 276.8348 | 265.1326 | 0.17125  | 0.600642134 | 0.510255874 |
| 2186.258 | 2157.082 | 2311.788 | -0.33037 | 0.025591463 | 0.002333217 |
| 173.3282 | 110.5481 | 134.1382 | -0.2126  | 0.241828097 | 0.583691606 |
| 4783.501 | 5010.895 | 5177.945 | 0.111508 | 0.745403683 | 0.339045793 |
| 38.4181  | 60.38342 | 55.54161 | -0.36485 | 0.824080056 | 0.497130933 |
| 2495.39  | 2497.087 | 2565.394 | -0.16829 | 0.671378444 | 0.317944832 |
| 0.893444 | 0        | 1.047955 | 0.203136 | NA          | NA          |
| 422.5991 | 433.8317 | 391.9351 | 0.068656 | 0.597339281 | 0.774877994 |
| 1893.208 | 2045.605 | 1898.894 | 0.214314 | 0.798030968 | 0.08210346  |
| 991.7231 | 966.1348 | 958.8787 | -0.03057 | 0.50957694  | 0.920188536 |
| 9.827887 | 5.573855 | 10.47955 | -0.88163 | 0.992476114 | NA          |
| 1493.839 | 1613.631 | 1490.192 | -0.05805 | 0.06343049  | 0.724404377 |
| 50.92632 | 57.5965  | 48.20593 | -0.04794 | 0.152933305 | 0.953867552 |
| 1210.617 | 1244.828 | 1225.059 | -0.15527 | 0.101166359 | 0.339089471 |
| 4488.664 | 4211.047 | 4036.722 | -0.04278 | 0.001306775 | 0.780344055 |
| 4.467221 | 4.644879 | 6.287729 | 1.833671 | NA          | NA          |
| 1.786889 | 0.928976 | 0        | -1.56985 | NA          | NA          |
| 40851.85 | 40003.55 | 39186.18 | -0.35685 | 0.946929815 | 0.00684915  |
| 100.9592 | 87.32372 | 156.1453 | 0.09905  | 0.880647749 | 0.871061917 |
| 669.1897 | 745.9675 | 775.4866 | -0.24319 | 0.826883467 | 0.198030129 |
| 152.779  | 206.2326 | 197.0155 | 0.036103 | 0.92288341  | 0.931618549 |
| 721.0095 | 848.1549 | 877.1382 | -0.49031 | 0.71554501  | 0.003904411 |
| 3249.457 | 3327.591 | 3459.299 | -0.12615 | 0.413714744 | 0.403397484 |
| 271.6071 | 353.0108 | 367.8322 | 0.396426 | 0.817060109 | 0.091639488 |
| 29.48366 | 68.74421 | 48.20593 | 0.560769 | 0.910682739 | NA          |
| 2165.709 | 2213.749 | 2173.458 | 0.024523 | 0.866874007 | 0.876257447 |
| 465.4845 | 491.4282 | 479.9633 | 0.595238 | 0.729802201 | 0.012314933 |
| 219.7873 | 206.2326 | 183.3921 | 0.263379 | 0.794232621 | 0.370687445 |
| 395.7958 | 410.6073 | 478.9154 | -0.09925 | 0.256151839 | 0.726635623 |
| 8.934443 | 8.360782 | 15.71932 | 0.308352 | 0.98299578  | NA          |
| 2692.841 | 2989.444 | 2480.509 | 0.034642 | 0.47934099  | 0.896421455 |
| 473.5255 | 564.8173 | 448.5247 | -0.23281 | 0.31883203  | 0.258091148 |
| 1.786889 | 0        | 4.19182  | 0.350297 | NA          | NA          |
| 1735.069 | 1634.068 | 1759.516 | -0.10985 | 0.859974619 | 0.447363679 |
| 859.4934 | 803.564  | 753.4796 | -0.01465 | 0.951118826 | 0.956290296 |
| 712.9685 | 702.3057 | 714.7052 | 0.146031 | 0.350762724 | 0.503879072 |
| 228.7217 | 215.5224 | 227.4062 | 0.098821 | 0.257483954 | 0.764162229 |
| 17388.21 | 17050.42 | 15920.53 | 0.015938 | 0.358649739 | 0.922703497 |
| 2305.98  | 2067.9   | 1969.107 | 0.044109 | 0.147662937 | 0.862092728 |
| 332.3613 | 318.6387 | 318.5783 | -0.02727 | 0.801320748 | 0.953279068 |

|          |          |          |          |             |             |
|----------|----------|----------|----------|-------------|-------------|
| 0        | 0        | 1.047955 | -0.68638 | NA          | NA          |
| 545.001  | 536.948  | 522.9295 | 0.251108 | 0.613451408 | 0.440703722 |
| 1013.166 | 892.7457 | 936.8717 | 0.211537 | 0.515985444 | 0.262359598 |
| 201.9184 | 274.9768 | 293.4274 | -0.0535  | 0.505612976 | 0.896670492 |
| 311.812  | 358.5846 | 297.6192 | 0.142696 | 0.46017679  | 0.636454553 |
| 18758.76 | 18869.36 | 19760.24 | -0.3679  | 0.484625827 | 0.002095105 |
| 75.04932 | 61.3124  | 81.74048 | -0.10986 | 0.134933146 | 0.860281493 |
| 1364.289 | 1375.813 | 1384.348 | 0.045701 | 0.867574132 | 0.775119272 |
| 585.206  | 564.8173 | 710.5134 | -0.37755 | 0.526676057 | 0.035698458 |
| 0        | 0        | 0        | #DIV/0!  | NA          | NA          |
| 0        | 0        | 0        | #DIV/0!  | NA          | NA          |
| 974.7477 | 1007.939 | 1006.037 | -0.32279 | 0.515985444 | 0.007388645 |
| 1342.847 | 1182.586 | 1195.717 | 0.074652 | 0.368786861 | 0.767645401 |
| 0        | 0        | 0        | #DIV/0!  | NA          | NA          |
| 0        | 0        | 0        | #DIV/0!  | NA          | NA          |
| 0        | 0        | 0        | #DIV/0!  | NA          | NA          |
| 0        | 0        | 0        | #DIV/0!  | NA          | NA          |
| 503.0091 | 491.4282 | 466.3399 | -0.10562 | 0.020838235 | 0.688662561 |
| 763.0014 | 648.4251 | 691.6502 | 0.260959 | 0.260444304 | 0.219522094 |
| 15.18855 | 22.29542 | 41.9182  | -0.13082 | 0.98878626  | NA          |
| 1119.486 | 1176.083 | 1327.759 | -0.30581 | 0.866564571 | 0.049190168 |
| 568.2305 | 476.5646 | 497.7786 | 0.17522  | 0.867574132 | 0.505302546 |
| 37.52466 | 43.66186 | 34.58251 | 0.305373 | 0.485974888 | 0.656460739 |
| 16.97544 | 22.29542 | 16.76728 | -0.18484 | 0.76103064  | NA          |
| 526.2387 | 549.0247 | 534.457  | 0.124213 | 0.441489237 | 0.653404441 |
| 4191.147 | 4281.649 | 4576.419 | -0.52995 | 3.50512E-06 | 3.97686E-08 |
| 734.4112 | 717.1693 | 577.4231 | 0.347398 | 0.411467295 | 0.139322477 |
| 24335.63 | 24341.02 | 23951.01 | -0.31265 | 0.70781734  | 0.044732366 |
| 968.4936 | 810.9958 | 736.7123 | 0.28561  | 0.899176451 | 0.161107365 |
| 292.1563 | 292.6274 | 333.2497 | -0.05781 | 0.382918803 | 0.869374053 |
| 880.0426 | 819.3566 | 867.7067 | 0.036872 | 0.019363982 | 0.885571199 |
| 1988.807 | 2092.053 | 2130.492 | 0.020486 | 0.496167264 | 0.912679298 |
| 370.7794 | 409.6783 | 390.8872 | 0.122927 | 0.817609984 | 0.628282957 |
| 3.573777 | 0        | 0        | -0.50147 | NA          | NA          |
| 0        | 0.928976 | 1.047955 | 0.229302 | NA          | NA          |
| 1030.141 | 921.544  | 859.323  | 0.177255 | 0.617661583 | 0.394044776 |
| 882.7229 | 1006.081 | 915.9126 | 0.17189  | 0.526561206 | 0.365253762 |
| 106.3199 | 83.60782 | 102.6996 | 0.035161 | 0.965666941 | 0.961026715 |
| 2.680333 | 0.928976 | 2.09591  | 0.758321 | NA          | NA          |
| 3890.056 | 4202.686 | 4089.12  | -0.19444 | 0.660114316 | 0.047449206 |
| 4930.919 | 4854.827 | 4804.873 | -0.15935 | 0.333641544 | 0.131512208 |
| 280.5415 | 319.5677 | 219.0226 | 0.010195 | 0.446999299 | 0.984456511 |
| 15.18855 | 6.50283  | 16.76728 | -0.00809 | 0.590474301 | NA          |
| 1221.338 | 1215.1   | 1369.677 | 0.064606 | 0.214235831 | 0.794250417 |
| 0        | 5.573855 | 4.19182  | 0.701114 | NA          | NA          |
| 253.7382 | 262.9001 | 241.0296 | 0.257133 | 0.941323092 | 0.387856411 |
| 354.6974 | 405.0334 | 356.3047 | 0.044189 | 0.596065856 | 0.907473183 |
| 2650.849 | 2643.865 | 2459.55  | 0.167681 | 0.231422023 | 0.335454169 |
| 1341.953 | 1426.907 | 1256.498 | 0.052727 | 0.033849408 | 0.808493325 |
| 745.1325 | 739.4647 | 662.3075 | -0.06224 | 0.367802825 | 0.797601985 |
| 949.7312 | 993.0751 | 1096.161 | 0.211148 | 0.349682314 | 0.251658635 |
| 2524.873 | 2372.604 | 2321.22  | 0.042118 | 0.014661969 | 0.875604624 |
| 1185.601 | 1251.33  | 1022.804 | 0.260221 | 0.083019794 | 0.186989586 |
| 100.9592 | 143.0623 | 77.54866 | -0.17616 | 0.596065856 | 0.752110266 |

|          |          |          |          |             |             |
|----------|----------|----------|----------|-------------|-------------|
| 0        | 0        | 1.047955 | #DIV/0!  | NA          | NA          |
| 0        | 0        | 1.047955 | #DIV/0!  | NA          | NA          |
| 0        | 0        | 1.047955 | #DIV/0!  | NA          | NA          |
| 0        | 0        | 1.047955 | #DIV/0!  | NA          | NA          |
| 2992.145 | 3197.535 | 2919.602 | -0.14322 | 0.010013524 | 0.321405678 |
| 0        | 0.928976 | 0        | #DIV/0!  | NA          | NA          |
| 0        | 0.928976 | 0        | #DIV/0!  | NA          | NA          |
| 0        | 0.928976 | 0        | #DIV/0!  | NA          | NA          |
| 0.893444 | 0        | 0        | #DIV/0!  | NA          | NA          |
| 0.893444 | 0        | 0        | #DIV/0!  | NA          | NA          |
| 0.893444 | 0        | 0        | #DIV/0!  | NA          | NA          |
| 0.893444 | 0        | 0        | #DIV/0!  | NA          | NA          |
| 0.893444 | 0        | 0        | #DIV/0!  | NA          | NA          |
| 1773.487 | 1920.193 | 1942.908 | -0.09638 | 0.065480816 | 0.569109784 |
| 724.5833 | 663.2887 | 697.938  | 0.131352 | 0.603004299 | 0.536510619 |
| 436.8942 | 482.1384 | 477.8674 | 0.173673 | 0.981076246 | 0.556186772 |
| 0        | 0        | 0        | #NUM!    | NA          | NA          |
| 2834.005 | 2955.072 | 2465.838 | 0.075329 | 0.396359861 | 0.724404377 |
| 1363.396 | 1412.043 | 1205.148 | 0.200663 | 0.46017679  | 0.318625647 |
| 1791.356 | 1692.594 | 1957.58  | -0.20428 | 0.430087902 | 0.114544408 |
| 854.1327 | 783.1266 | 833.1241 | 0.078753 | 0.618280897 | 0.752110266 |
| 787.1244 | 787.7714 | 746.1439 | 0.235835 | 0.752287766 | 0.278856737 |
| 597.7142 | 552.7406 | 542.8406 | 0.13027  | 0.503345543 | 0.502183544 |
| 240.3365 | 239.6757 | 211.6869 | 0.047084 | 0.682715357 | 0.899275854 |
| 174.2216 | 140.2753 | 148.8096 | -0.00377 | 0.2795135   | 0.996992829 |
| 1725.241 | 1690.736 | 1589.748 | -0.22513 | 0.367802825 | 0.045823334 |
| 820.1818 | 909.4673 | 820.5487 | -0.03185 | 0.033512898 | 0.896567419 |
| 11.61478 | 7.431806 | 6.287729 | -0.80662 | 0.871801928 | NA          |
| 1245.461 | 1198.379 | 1279.553 | 0.039925 | 0.6771199   | 0.869372302 |
| 437.7877 | 405.0334 | 320.6742 | -0.00111 | 0.948234757 | 0.999921357 |
| 6914.365 | 7006.335 | 6902.879 | -0.01587 | 0.301520393 | 0.924154584 |
| 77.72965 | 88.2527  | 66.02116 | 0.101582 | 0.844410461 | 0.886786965 |
| 675.4439 | 540.6639 | 613.0536 | -0.12265 | 0.97820156  | 0.645108746 |
| 195.6643 | 259.1842 | 266.1805 | -0.18776 | 0.021160717 | 0.576050724 |
| 15113.5  | 14782.79 | 14965.84 | -0.17909 | 0.612715269 | 0.136963708 |
| 775.5096 | 706.0216 | 914.8646 | -0.50904 | 0.768012666 | 0.005818131 |
| 392.222  | 403.1755 | 360.4965 | -0.27446 | 0.1759595   | 0.146138686 |
| 3093.997 | 3043.325 | 3382.798 | -0.08875 | 0.981637588 | 0.602240104 |
| 276.9677 | 235.0309 | 274.5642 | -0.20947 | 0.230144662 | 0.420106203 |
| 1179.346 | 1125.919 | 1186.285 | -0.1112  | 0.290962131 | 0.586606456 |
| 1279.412 | 1277.342 | 1488.096 | 0.002409 | 0.838656637 | 0.993021449 |
| 1.786889 | 4.644879 | 13.62341 | 0.38231  | NA          | NA          |
| 897.018  | 829.5754 | 958.8787 | -0.24506 | 0.445880938 | 0.070104672 |
| 150.9921 | 186.7241 | 199.1114 | -0.31326 | 0.946065985 | 0.309801385 |
| 938.1165 | 953.1291 | 927.4401 | 0.083737 | 0.489992231 | 0.787476613 |
| 147.4183 | 162.5708 | 111.0832 | 0.173085 | 0.337999896 | 0.74588273  |
| 9260.55  | 9313.911 | 11885.9  | -0.53077 | 0.715641565 | 0.000501849 |
| 1461.675 | 1517.946 | 1381.205 | -0.02491 | 0.739965249 | 0.902386847 |
| 14664.99 | 14505.96 | 15230.98 | -0.27412 | 0.916166526 | 0.040829913 |
| 1704.692 | 1684.233 | 1482.856 | 0.063473 | 0.136814544 | 0.721425275 |
| 9428.517 | 9551.729 | 9342.518 | -0.11665 | 0.983970277 | 0.30864647  |
| 1.786889 | 0.928976 | 2.09591  | -1.13069 | NA          | NA          |
| 168.861  | 164.4287 | 177.1044 | 0.674409 | 0.66770133  | 0.060851524 |
| 0.893444 | 1.857952 | 1.047955 | -1.12238 | NA          | NA          |

|          |          |          |          |             |             |
|----------|----------|----------|----------|-------------|-------------|
| 855.9196 | 785.9135 | 879.2342 | -0.11373 | 0.847624712 | 0.559214222 |
| 2641.915 | 2720.041 | 2801.183 | -0.07402 | 0.994002024 | 0.658318551 |
| 3.573777 | 8.360782 | 3.143865 | -0.34326 | 0.813154117 | NA          |
| 422.5991 | 443.1214 | 390.8872 | 0.397434 | 0.962011634 | 0.165590641 |
| 947.0509 | 945.6973 | 822.6446 | 0.226665 | 0.999122571 | 0.180352621 |
| 2494.496 | 2230.471 | 2382.001 | -0.13492 | 0.324651337 | 0.484163033 |
| 322.5334 | 291.6984 | 315.4344 | -0.0122  | 0.327341    | 0.96505606  |
| 141.1642 | 115.193  | 126.8025 | 0.317941 | 0.426622274 | 0.563375937 |
| 4.467221 | 7.431806 | 8.383639 | 0.29404  | 0.897766774 | NA          |
| 301.9842 | 185.7952 | 238.9337 | -0.22583 | 0.968581517 | 0.520301247 |
| 2943.005 | 2951.356 | 2651.326 | 0.156743 | 0.957754117 | 0.486229634 |
| 334.1482 | 385.5249 | 350.0169 | -0.24279 | 0.837998472 | 0.237500588 |
| 2174.643 | 2076.261 | 2140.972 | 0.034695 | 0.959690198 | 0.848456292 |
| 2599.029 | 2374.462 | 2231.096 | 0.086101 | 0.005997911 | 0.696921855 |
| 626.3044 | 599.1894 | 637.1566 | 0.067304 | 0.707092679 | 0.765789524 |
| 53.60666 | 79.89192 | 46.11002 | 0.203152 | 0.794232621 | 0.748708061 |
| 3524.638 | 3264.421 | 3166.92  | 0.111364 | 0.022069615 | 0.559214222 |
| 544.1076 | 660.5018 | 606.7659 | -0.27975 | 0.975298616 | 0.119347432 |
| 61.64765 | 45.51981 | 72.30889 | 0.291541 | 0.937806584 | 0.676538655 |
| 1910.184 | 1785.491 | 1687.207 | 0.172185 | 0.269120346 | 0.472093197 |
| 24.12299 | 31.58518 | 41.9182  | 0.028875 | 0.892240442 | NA          |
| 310.9186 | 394.8147 | 389.8392 | -0.15808 | 0.85272133  | 0.567139643 |
| 2995.719 | 2893.759 | 2456.406 | -0.00434 | 0.735300868 | 0.990142758 |
| 5414.272 | 5404.781 | 5311.035 | 0.111565 | 0.218540286 | 0.317595626 |
| 170.6479 | 143.9912 | 124.7066 | 0.275659 | 0.856763291 | 0.522839098 |
| 744.2391 | 592.6865 | 648.6841 | -0.10563 | 0.608976999 | 0.660222897 |
| 352.017  | 300.0592 | 323.8181 | 0.297714 | 0.080445087 | 0.1869705   |
| 1340.166 | 1382.316 | 1341.382 | -0.02393 | 0.12999813  | 0.896421455 |
| 83.98376 | 81.74987 | 78.59662 | 0.186051 | 0.817712901 | 0.703453769 |
| 1534.937 | 1457.563 | 1607.563 | 0.16058  | 0.517968435 | 0.278856737 |
| 702.2472 | 711.5954 | 795.3978 | -0.05498 | 0.310114043 | 0.822050288 |
| 528.919  | 543.4508 | 572.1834 | -0.00644 | 0.352663598 | 0.988943755 |
| 7746.162 | 7840.555 | 6856.769 | 0.008524 | 0.590879965 | 0.990023409 |
| 1286.56  | 1458.492 | 1199.908 | -0.16903 | 0.976661259 | 0.353465216 |
| 1944.135 | 2119.923 | 2216.425 | -0.18562 | 0.804201321 | 0.241619328 |
| 248.3775 | 230.386  | 247.3174 | -0.07676 | 0.907472172 | 0.838059844 |
| 927.3951 | 992.1461 | 934.7758 | 0.277891 | 0.760227016 | 0.162293367 |
| 1846.749 | 1719.534 | 1681.968 | 0.025908 | 0.825444223 | 0.91372954  |
| 2041.52  | 1896.969 | 2165.075 | 0.09093  | 0.469192599 | 0.656162087 |
| 41533.54 | 40559.08 | 42057.57 | -0.43407 | 0.766887678 | 0.001503374 |
| 486.0337 | 549.9537 | 551.2243 | 0.014697 | 0.532750573 | 0.96009156  |
| 496.755  | 575.965  | 599.4302 | -0.07968 | 0.402252256 | 0.726635623 |
| 882.7229 | 916.8991 | 796.4457 | 0.025369 | 0.246680945 | 0.915970521 |
| 814.8212 | 930.8337 | 816.3569 | 0.049021 | 0.503345543 | 0.854044896 |
| 1733.282 | 1674.943 | 1768.948 | 0.202656 | 0.755224646 | 0.284997366 |
| 0        | 0.928976 | 1.047955 | 0.586005 | NA          | NA          |
| 3118.12  | 3043.325 | 3338.784 | -0.02724 | 0.226746984 | 0.872508626 |
| 674.5504 | 693.9449 | 797.4937 | -0.01097 | 0.968325512 | 0.974691849 |
| 1081.961 | 1065.535 | 1131.791 | 0.165164 | 0.233378357 | 0.523725333 |
| 1168.625 | 1164.007 | 1085.681 | 0.096885 | 0.794232621 | 0.615745925 |
| 3467.457 | 3531.037 | 3176.351 | -0.08265 | 0.001009169 | 0.683195977 |
| 51.81977 | 52.02264 | 50.30183 | 0.557328 | 0.470002734 | 0.360145579 |
| 1.786889 | 0        | 3.143865 | #DIV/0!  | NA          | NA          |
| 23.22955 | 23.22439 | 15.71932 | -0.70697 | 0.302724041 | NA          |

|          |          |          |          |             |             |
|----------|----------|----------|----------|-------------|-------------|
| 588.7798 | 594.5445 | 615.1495 | 0.329936 | 0.201936757 | 0.051992282 |
| 101.8526 | 115.193  | 164.5289 | 0.48839  | 0.827474725 | 0.2912749   |
| 810.3539 | 764.5471 | 804.8294 | 0.022133 | 0.613734914 | 0.923725803 |
| 271.6071 | 274.0478 | 201.2073 | -0.10805 | 0.327341    | 0.775439768 |
| 2448.931 | 2630.859 | 2354.755 | -0.06908 | 0.175031997 | 0.678741853 |
| 353.8039 | 319.5677 | 417.086  | 0.217624 | 0.430461737 | 0.432540736 |
| 627.1979 | 678.1523 | 674.883  | -0.13327 | 0.926742921 | 0.505493145 |
| 1081.961 | 1122.203 | 1063.674 | 0.353187 | 0.182855445 | 0.021007242 |
| 1257.076 | 1258.762 | 1189.429 | 0.064978 | 0.462276826 | 0.739117108 |
| 721.0095 | 733.8909 | 769.1989 | 0.062912 | 0.787792061 | 0.802401887 |
| 940.7968 | 1067.393 | 999.749  | 0.556127 | 0.03968658  | 0.000601979 |
| 243.9103 | 257.3263 | 242.0776 | 0.368836 | 0.879847555 | 0.148994093 |
| 1039.076 | 1101.765 | 1059.482 | 0.070301 | 0.502258444 | 0.786706509 |
| 679.9111 | 893.6747 | 748.2398 | -0.15135 | 0.824114534 | 0.576591259 |
| 0        | 0        | 3.143865 | #DIV/0!  | NA          |             |
| 61.64765 | 34.3721  | 47.15797 | 0.367692 | 0.490249604 | 0.596309029 |
| 0.893444 | 1.857952 | 0        | 0.062907 | NA          |             |
| 593.247  | 578.7519 | 624.5811 | 0.105992 | 0.766253365 | 0.690294956 |
| 247.4841 | 242.4627 | 263.0367 | 0.181967 | 0.898465596 | 0.544356068 |
| 97.38542 | 90.11065 | 98.50776 | -0.28097 | 0.317073718 | 0.495283424 |
| 268.0333 | 241.5337 | 317.5303 | 0.019663 | 0.649714874 | 0.9717805   |
| 2551.677 | 2617.854 | 2309.693 | 0.135523 | 0.167511517 | 0.346094927 |
| 1713.626 | 1874.673 | 1792.003 | 0.073326 | 0.051978056 | 0.673302041 |
| 1180.24  | 1063.677 | 1030.14  | 0.202126 | 0.394915233 | 0.41069386  |
| 377.9269 | 347.4369 | 343.7292 | 0.443589 | 0.03968658  | 0.16141555  |
| 538.7469 | 471.9197 | 531.3131 | -0.17936 | 0.946929815 | 0.39276575  |
| 1329.445 | 1196.521 | 1395.876 | -0.46086 | 7.34828E-05 | 0.000739443 |
| 3.573777 | 0.928976 | 2.09591  | -0.59366 | NA          |             |
| 227.8283 | 188.5821 | 233.6939 | 0.037702 | 0.025033988 | 0.928448576 |
| 3.573777 | 0        | 4.19182  | 0.203136 | NA          |             |
| 844.3048 | 973.5666 | 846.7476 | -0.12677 | 0.686179051 | 0.538565977 |
| 407.4106 | 404.1045 | 358.4006 | -0.01502 | 0.828379866 | 0.965364339 |
| 1265.117 | 998.6489 | 1221.915 | -0.08891 | 0.897898013 | 0.71268973  |
| 8.040998 | 5.573855 | 8.383639 | -0.82771 | 0.072756064 | NA          |
| 415.4516 | 362.3005 | 388.7913 | -0.02811 | 0.185762147 | 0.930744684 |
| 352.9105 | 325.1415 | 326.9619 | 0.04664  | 0.54674796  | 0.896421455 |
| 981.0018 | 1009.797 | 1099.305 | -0.39337 | 0.778796446 | 0.01252509  |
| 15256.45 | 14770.71 | 14769.88 | -0.02567 | 0.335983122 | 0.875604624 |
| 671.8701 | 775.6948 | 684.3145 | -0.09733 | 0.141058983 | 0.678003973 |
| 6.25411  | 3.715903 | 6.287729 | 1.625798 | NA          |             |
| 229.6152 | 203.4457 | 213.7828 | -0.10252 | 0.433690703 | 0.795664302 |
| 863.9606 | 716.2403 | 760.8153 | 0.041972 | 0.672813076 | 0.877444629 |
| 824.6491 | 920.615  | 785.9662 | 0.019868 | 0.005734939 | 0.948840677 |
| 952.4116 | 967.9927 | 886.5698 | -0.02995 | 0.58195463  | 0.884746998 |
| 9474.976 | 9195.002 | 11331.54 | -0.06726 | 0.962556121 | 0.778766112 |
| 1099.83  | 1067.393 | 1113.976 | 0.072854 | 0.446999299 | 0.75448001  |
| 1192.748 | 1214.171 | 1054.243 | 0.174692 | 0.44839829  | 0.429681987 |
| 1.786889 | 0.928976 | 0        | #DIV/0!  | NA          |             |
| 1117.699 | 995.862  | 998.701  | 0.365718 | 0.499877044 | 0.163200347 |
| 0        | 0        | 0        | #DIV/0!  | NA          |             |
| 0        | 0        | 0        | #DIV/0!  | NA          |             |
| 0        | 0        | 0        | #NUM!    | NA          |             |
| 0        | 0        | 0        | #DIV/0!  | NA          |             |
| 0        | 0        | 0        | #DIV/0!  | NA          |             |

|          |          |          |          |             |             |
|----------|----------|----------|----------|-------------|-------------|
| 0        | 0        | 0        | #DIV/0!  | NA          | NA          |
| 0        | 0        | 0        | #DIV/0!  | NA          | NA          |
| 0        | 0        | 0        | #DIV/0!  | NA          | NA          |
| 0        | 0        | 0        | #DIV/0!  | NA          | NA          |
| 0        | 0        | 0        | #DIV/0!  | NA          | NA          |
| 0        | 0        | 0        | #DIV/0!  | NA          | NA          |
| 0        | 0        | 0        | #DIV/0!  | NA          | NA          |
| 0        | 0        | 0        | #DIV/0!  | NA          | NA          |
| 0        | 0        | 0        | #DIV/0!  | NA          | NA          |
| 43.77877 | 26.01132 | 22.00705 | 0.250047 | 0.818823133 | NA          |
| 1527.79  | 1445.486 | 1532.11  | -0.08513 | 0.896968012 | 0.622470399 |
| 7186.866 | 6803.818 | 7117.71  | -0.04161 | 0.986125936 | 0.83508691  |
| 660.2553 | 700.4477 | 692.6982 | 0.01161  | 0.743726011 | 0.971658868 |
| 0        | 0.928976 | 0        | -3.18218 | NA          | NA          |
| 433.3205 | 452.4112 | 446.4288 | 0.055885 | 0.858075407 | 0.872630949 |
| 768.3621 | 742.2516 | 847.7955 | -0.22767 | 0.824111765 | 0.324170132 |
| 217.107  | 238.7468 | 248.3653 | -0.42301 | 0.860108299 | 0.045393537 |
| 1320.511 | 1240.183 | 1291.08  | -0.20243 | 0.032629043 | 0.316402463 |
| 290.3694 | 307.491  | 280.8519 | -0.02947 | 0.916416444 | 0.933856082 |
| 1.786889 | 2.786927 | 3.143865 | -0.84976 | NA          | NA          |
| 5126.583 | 5330.463 | 5845.492 | -0.2272  | 0.232941496 | 0.06712239  |
| 0        | 0        | 1.047955 | -2.91464 | NA          | NA          |
| 802.3129 | 810.9958 | 731.4725 | 0.009506 | 0.68563527  | 0.964974564 |
| 1090.002 | 1016.299 | 1168.47  | 0.070144 | 0.813154117 | 0.723760266 |
| 1802.077 | 1765.983 | 1969.107 | 0.158983 | 0.69338056  | 0.527083496 |
| 1.786889 | 0        | 2.09591  | 0.55984  | NA          | NA          |
| 3947.237 | 4044.76  | 4472.671 | -0.12508 | 0.837998472 | 0.406585578 |
| 0        | 2.786927 | 3.143865 | 0.338688 | NA          | NA          |
| 1751.151 | 1833.798 | 1863.264 | -0.1014  | 0.944097019 | 0.420675433 |
| 35199.92 | 34772.49 | 35241.68 | -0.3735  | 0.713016559 | 0.002890232 |
| 0        | 0        | 3.143865 | #DIV/0!  | NA          | NA          |
| 154.5659 | 174.6474 | 165.5769 | 0.629107 | 0.842190796 | 0.118018607 |
| 2675.866 | 2706.106 | 2421.824 | 0.15798  | 0.036478363 | 0.422498267 |
| 0        | 3.715903 | 0        | #DIV/0!  | NA          | NA          |
| 275.1808 | 341.8631 | 319.6262 | -0.10311 | 0.569085135 | 0.754561878 |
| 854.1327 | 743.1806 | 780.7264 | 0.248301 | 0.599504319 | 0.155370416 |
| 2161.242 | 2197.028 | 2000.546 | 0.158467 | 0.312337571 | 0.46008868  |
| 247.4841 | 241.5337 | 281.8999 | 0.09742  | 0.209524948 | 0.80177911  |
| 2.680333 | 4.644879 | 0        | 1.286265 | NA          | NA          |
| 1220.445 | 1219.745 | 1191.525 | 0.073137 | 0.621093622 | 0.813492611 |
| 3501.408 | 3602.568 | 3201.502 | -0.02779 | 0.106967826 | 0.895919028 |
| 0        | 0.928976 | 2.09591  | #DIV/0!  | NA          | NA          |
| 1350.888 | 1450.131 | 1639.001 | -0.32937 | 0.648624949 | 0.037459793 |
| 2737.513 | 2892.831 | 2697.436 | 0.105503 | 0.004142595 | 0.639253997 |
| 706.7144 | 843.51   | 756.6234 | 0.086291 | 0.112535001 | 0.733719596 |
| 742.4522 | 865.8054 | 779.6784 | -0.29417 | 0.4069354   | 0.068011569 |
| 38.4181  | 13.00566 | 25.15092 | 0.140934 | 0.976681492 | NA          |
| 394.9024 | 405.0334 | 318.5783 | 0.174488 | 0.907551741 | 0.55088846  |
| 1584.077 | 1673.085 | 1687.207 | -0.06794 | 0.492727322 | 0.752110266 |
| 2041.52  | 2034.457 | 1997.402 | -0.04962 | 0.920564616 | 0.783572702 |
| 0.893444 | 0        | 2.09591  | -1.59173 | NA          | NA          |
| 160.82   | 186.7241 | 173.9605 | 0.169892 | 0.529229854 | 0.665181522 |
| 69.68865 | 97.54245 | 99.55571 | 0.094001 | 0.234629688 | 0.880577976 |
| 3848.064 | 3775.357 | 3615.444 | -0.06867 | 0.994679365 | 0.566742383 |

|          |          |          |          |             |             |
|----------|----------|----------|----------|-------------|-------------|
| 517.3042 | 457.9851 | 427.5656 | -0.2096  | 0.573411006 | 0.362995196 |
| 444.9352 | 461.701  | 434.9013 | 0.228469 | 0.310443697 | 0.344955641 |
| 18756.97 | 18882.36 | 20484.37 | -0.41775 | 0.43229338  | 0.000594901 |
| 3.573777 | 0.928976 | 6.287729 | -0.92204 | 0.648256394 | NA          |
| 343.0826 | 399.4596 | 440.1411 | -0.0277  | 0.826883467 | 0.924895748 |
| 792.4851 | 861.1605 | 788.0621 | 0.164776 | 0.817609984 | 0.397126214 |
| 410.0909 | 373.4483 | 402.4147 | 0.029018 | 0.798409569 | 0.924154584 |
| 1160.584 | 1021.873 | 1060.53  | -0.11    | 0.976681492 | 0.579998211 |
| 3.573777 | 3.715903 | 3.143865 | #DIV/0!  | NA          |             |
| 802.3129 | 828.6464 | 838.3639 | 0.126994 | 0.947529145 | 0.500602324 |
| 17.86889 | 26.01132 | 17.81523 | 0.908088 | 0.903271991 | NA          |
| 688.8455 | 771.9789 | 755.5755 | 0.30911  | 0.9397169   | 0.072626489 |
| 535.1731 | 466.3458 | 479.9633 | -0.00344 | 0.855606042 | 0.992528568 |
| 1128.42  | 1181.657 | 1143.319 | -0.27858 | 0.744600754 | 0.056859994 |
| 487.8206 | 522.0844 | 597.3343 | 0.114788 | 0.856745942 | 0.666030043 |
| 516.4108 | 593.6155 | 427.5656 | 0.107744 | 0.709468629 | 0.72969638  |
| 910.4197 | 795.2033 | 819.5007 | 0.311565 | 0.812875146 | 0.076772392 |
| 0        | 0        | 5.239774 | #DIV/0!  | NA          |             |
| 3.573777 | 2.786927 | 3.143865 | 0.019084 | NA          |             |
| 204.5987 | 150.4941 | 185.488  | -0.13193 | 0.743382516 | 0.714941358 |
| 212.6397 | 210.8775 | 230.5501 | -0.11143 | 0.703609106 | 0.739592868 |
| 83.98376 | 107.7612 | 190.7278 | -0.38424 | 0.619720339 | 0.407303742 |
| 113.4674 | 117.9799 | 114.2271 | -0.1164  | 0.84819607  | 0.765144842 |
| 0        | 0        | 1.047955 | #DIV/0!  | NA          |             |
| 962.2395 | 979.1405 | 1046.907 | 0.181529 | 0.820929887 | 0.239197322 |
| 1324.978 | 1304.282 | 1285.841 | 0.138769 | 0.518546793 | 0.361564535 |
| 0        | 5.573855 | 0        | -0.01636 | NA          |             |
| 2731.259 | 2688.456 | 2593.688 | 0.027396 | 0.010350895 | 0.875604624 |
| 331.4678 | 386.4539 | 357.3526 | 0.485603 | 0.733351868 | 0.021007242 |
| 1760.085 | 1724.179 | 1807.722 | 0.249733 | 0.134933146 | 0.056160428 |
| 809.4605 | 814.7117 | 970.4062 | 0.042374 | 0.114505424 | 0.894414367 |
| 3271.793 | 3070.265 | 2565.394 | 0.067688 | 0.458486853 | 0.806564543 |
| 1066.772 | 1010.726 | 1010.229 | 0.199818 | 0.064620826 | 0.332512918 |
| 520.878  | 505.3628 | 486.2511 | 0.175138 | 0.614621507 | 0.499732235 |
| 1412.535 | 1337.725 | 1379.109 | -0.10577 | 0.338642963 | 0.697416669 |
| 571.8043 | 479.3515 | 456.9083 | 0.152296 | 0.828016939 | 0.625382385 |
| 3982.081 | 3878.474 | 4248.409 | -0.19318 | 0.939162869 | 0.21731463  |
| 1802.077 | 1939.701 | 1913.566 | 0.031787 | 0.934088907 | 0.855100406 |
| 5084.591 | 5174.395 | 6086.522 | 0.282518 | 0.406883355 | 0.057034038 |
| 3528.211 | 3652.733 | 3451.963 | -0.3936  | 0.006229103 | 4.66726E-07 |
| 654.0012 | 549.0247 | 681.1707 | 0.074854 | 0.09014688  | 0.793207865 |
| 330.5744 | 439.4055 | 429.6615 | 0.076849 | 0.817060109 | 0.8325893   |
| 1429.511 | 1437.126 | 1444.082 | -0.22697 | 0.078514584 | 0.324099572 |
| 586.0994 | 595.4735 | 654.9718 | 0.019238 | 0.828016939 | 0.952588397 |
| 111.6805 | 87.32372 | 99.55571 | 0.155903 | 0.6771199   | 0.762128192 |
| 3741.745 | 3887.764 | 4301.855 | -0.2261  | 0.938838346 | 0.071238709 |
| 365.4187 | 436.6186 | 447.4767 | -0.10362 | 0.660114316 | 0.708596546 |
| 18.76233 | 28.79825 | 28.29478 | -0.02815 | 0.84819607  | NA          |
| 237.6562 | 209.0195 | 183.3921 | -0.04163 | 0.748298735 | 0.919915102 |
| 995.2969 | 983.7853 | 923.2483 | -0.00418 | 0.669860929 | 0.988370025 |
| 4883.566 | 4784.225 | 5342.474 | 0.00972  | 0.365690431 | 0.956290296 |
| 1315.15  | 1532.81  | 1596.035 | -0.10426 | 0.962660515 | 0.656489824 |
| 0        | 0.928976 | 0        | -3.3109  | NA          |             |
| 589.6732 | 580.6099 | 525.0254 | 0.171937 | 0.617661583 | 0.491917195 |

|          |          |          |          |             |             |
|----------|----------|----------|----------|-------------|-------------|
| 282.3284 | 301.9171 | 310.1946 | -0.38291 | 0.547164305 | 0.129705424 |
| 1156.117 | 1072.038 | 1142.271 | 0.136684 | 0.499740672 | 0.452447922 |
| 536.0666 | 472.8487 | 418.134  | 0.14042  | 0.720425175 | 0.602036712 |
| 203.7053 | 209.9485 | 212.7348 | 0.100345 | 0.485574782 | 0.794150873 |
| 612.9028 | 587.1127 | 540.7447 | 0.078263 | 0.040735143 | 0.739592868 |
| 109.0002 | 113.335  | 96.41185 | 0.490188 | 0.919747739 | 0.394438057 |
| 1216.871 | 1205.811 | 1067.866 | -0.17544 | 0.71034712  | 0.351487828 |
| 18311.14 | 18172.62 | 18244.89 | -0.3297  | 0.6333028   | 0.02032709  |
| 9890.428 | 9987.418 | 9853.92  | -0.06035 | 0.257606642 | 0.684131921 |
| 464.591  | 444.0504 | 479.9633 | -0.23277 | 0.511726855 | 0.38622273  |
| 930.0755 | 866.7344 | 944.2074 | 0.15347  | 0.203841572 | 0.49670864  |
| 145.6314 | 138.4174 | 132.0423 | -0.59406 | 0.831928191 | 0.139776747 |
| 438.6811 | 378.0931 | 366.7842 | -0.54003 | 0.357841712 | 0.017241442 |
| 3600.58  | 3690.821 | 3330.401 | 0.05296  | 0.573411006 | 0.80030609  |
| 2750.915 | 2636.433 | 2851.485 | -0.01573 | 0.990604058 | 0.948957763 |
| 820.1818 | 924.3309 | 788.0621 | 0.050388 | 0.827268091 | 0.839609028 |
| 8.934443 | 1.857952 | 4.19182  | -1.63966 | 0.999199613 | NA          |
| 165.2872 | 190.44   | 232.646  | -0.3716  | 0.910726255 | 0.199496415 |
| 547.6813 | 520.2264 | 624.5811 | 0.231837 | 0.817609984 | 0.255582054 |
| 731.7308 | 614.982  | 810.0691 | 0.050113 | 0.235856061 | 0.884584155 |
| 14.29511 | 14.86361 | 25.15092 | 0.200352 | 0.837529432 | NA          |
| 1814.585 | 1726.037 | 1892.607 | -0.0858  | 0.936346196 | 0.694075461 |
| 3455.842 | 3225.404 | 3421.573 | 0.082253 | 0.22919987  | 0.600739068 |
| 301.9842 | 281.4797 | 297.6192 | -0.22168 | 0.71270119  | 0.422793542 |
| 1609.093 | 1616.418 | 1462.945 | 0.155952 | 0.169117813 | 0.375904486 |
| 5753.781 | 6298.456 | 5938.76  | -0.10405 | 0.831143588 | 0.499455038 |
| 553.042  | 535.09   | 520.8336 | -0.00619 | 0.368085564 | 0.977548356 |
| 1.786889 | 4.644879 | 7.335684 | 0.024094 | NA          | NA          |
| 45.56566 | 52.95162 | 59.73343 | -0.86132 | 0.92288341  | 0.102132739 |
| 233.189  | 211.8065 | 293.4274 | -0.36688 | 0.71034712  | 0.171952931 |
| 14.29511 | 9.289758 | 8.383639 | 0.424564 | 0.817609984 | NA          |
| 852.3458 | 718.0983 | 594.1904 | 0.231259 | 0.226961756 | 0.40615036  |
| 83.09032 | 36.23005 | 51.34979 | 0.203556 | 0.682715357 | 0.840777068 |
| 1623.388 | 1680.517 | 1502.767 | 0.142706 | 0.795376015 | 0.38666632  |
| 1266.011 | 1391.606 | 1221.915 | 0.034722 | 0.457531489 | 0.878767667 |
| 33.95088 | 24.15337 | 50.30183 | 0.432014 | 0.681419018 | NA          |
| 1999.528 | 2326.155 | 2363.138 | -0.08456 | 0.455280748 | 0.668686407 |
| 7.147554 | 4.644879 | 12.57546 | -0.18015 | 0.948234757 | NA          |
| 0.893444 | 0.928976 | 3.143865 | -0.91737 | NA          | NA          |
| 1629.642 | 1712.102 | 1620.138 | 0.122472 | 0.610382096 | 0.351487828 |
| 2728.579 | 2857.529 | 2739.354 | -0.16934 | 0.197190189 | 0.142939621 |
| 1003.338 | 1005.152 | 780.7264 | 0.265244 | 0.572336545 | 0.267586812 |
| 1795.823 | 1788.278 | 2013.121 | -0.04811 | 0.102371821 | 0.870656158 |
| 657.575  | 719.9562 | 780.7264 | 0.126283 | 0.469683278 | 0.600553967 |
| 276.9677 | 249.8945 | 250.4612 | 0.050507 | 0.679066538 | 0.882926075 |
| 3094.891 | 3113.927 | 3349.264 | 0.480866 | 0.840099446 | 6.42867E-06 |
| 328.7875 | 279.6217 | 321.7222 | -0.07253 | 0.497263297 | 0.815439094 |
| 1753.831 | 1926.696 | 1692.447 | 0.091556 | 0.220715145 | 0.658878607 |
| 0        | 5.573855 | 0        | -1.10793 | NA          | NA          |
| 132.2298 | 86.39475 | 147.7616 | -0.28529 | 0.843186128 | 0.44144154  |
| 167.9675 | 153.281  | 209.591  | 0.368058 | 0.38025264  | 0.413703728 |
| 1806.544 | 1607.128 | 1623.282 | 0.118575 | 0.226842122 | 0.421538281 |
| 805.8867 | 796.1322 | 783.8703 | -0.02488 | 0.207380345 | 0.914120833 |
| 299.3038 | 333.5023 | 296.5712 | -0.02012 | 0.959859312 | 0.953528509 |



|          |          |          |          |             |    |             |
|----------|----------|----------|----------|-------------|----|-------------|
| 1.786889 | 1.857952 | 1.047955 | #DIV/0!  | NA          | NA |             |
| 4899.648 | 4619.796 | 5134.979 | 0.080729 | 0.72676049  |    | 0.626829627 |
| 11024.21 | 11028.8  | 10299.3  | -0.04231 | 0.985859213 |    | 0.802920813 |
| 2261.307 | 2367.959 | 1900.99  | 0.050396 | 0.469192599 |    | 0.854337819 |
| 116.1478 | 161.6418 | 142.5219 | 0.217455 | 0.080905938 |    | 0.613026721 |
| 773.7227 | 842.581  | 951.543  | -0.46299 | 0.017639055 |    | 0.00145335  |
| 6104.905 | 6022.55  | 5926.185 | 0.053512 | 0.62498123  |    | 0.745567347 |
| 1823.52  | 1833.798 | 1802.482 | -0.1766  | 0.691366556 |    | 0.162970478 |
| 166.1806 | 168.1446 | 185.488  | -0.22106 | 0.759261525 |    | 0.436291984 |
| 877.3623 | 750.6124 | 753.4796 | 0.064266 | 0.447208798 |    | 0.780325172 |
| 338.6154 | 366.9454 | 267.2285 | -0.06949 | 0.27384839  |    | 0.87466351  |
| 328.7875 | 317.7097 | 294.4753 | 0.102135 | 0.848694292 |    | 0.720614012 |
| 694.2062 | 743.1806 | 782.8223 | 0.010933 | 0.698024229 |    | 0.9717805   |
| 1459.888 | 1360.021 | 1380.157 | -0.11094 | 0.967813477 |    | 0.55088846  |
| 12630.62 | 12587.62 | 12392.07 | -0.29705 | 0.74589429  |    | 0.009939038 |
| 971.1739 | 853.7287 | 877.1382 | 0.138631 | 0.6333028   |    | 0.498608433 |
| 431.5336 | 480.2805 | 479.9633 | -0.00325 | 0.585115533 |    | 0.988966742 |
| 736.1981 | 605.6922 | 606.7659 | 0.230705 | 0.536343685 |    | 0.21731463  |
| 48.24599 | 52.95162 | 52.39774 | 0.042285 | 0.937806584 |    | 0.973573759 |
| 5744.847 | 5537.625 | 5919.897 | -0.15226 | 0.989430108 |    | 0.253946352 |
| 1587.65  | 1485.432 | 1287.937 | 0.118836 | 0.307348283 |    | 0.505302546 |
| 454.7631 | 412.4652 | 347.921  | 0.087679 | 0.551840208 |    | 0.775439768 |
| 54.5001  | 66.88625 | 58.68547 | -0.0475  | 0.191229725 |    | 0.936563036 |
| 1129.314 | 1184.444 | 1075.202 | 0.286996 | 0.231538797 |    | 0.095730045 |
| 851.4524 | 939.1945 | 828.9323 | 0.13286  | 0.59039068  |    | 0.505302546 |
| 50.92632 | 73.38909 | 75.45275 | 0.59685  | 0.978835583 |    | 0.333065318 |
| 971.1739 | 1006.081 | 891.8096 | 0.016986 | 0.706962639 |    | 0.946838074 |
| 41.09844 | 42.73289 | 54.49365 | 0.203385 | 0.826883467 |    | 0.767645401 |
| 70.5821  | 64.09933 | 75.45275 | -0.28825 | 0.513499171 |    | 0.552800466 |
| 4863.911 | 4886.413 | 4723.133 | 0.095825 | 4.17743E-05 |    | 0.536510619 |
| 943.4771 | 976.3535 | 1147.511 | -0.40821 | 0.810878938 |    | 0.033645271 |
| 300.1973 | 350.2239 | 343.7292 | -0.17411 | 0.138269747 |    | 0.507147953 |
| 237.6562 | 270.3319 | 215.8787 | 0.666015 | 0.090068897 |    | 0.15455096  |
| 846.9852 | 893.6747 | 930.5839 | 0.201688 | 0.164920979 |    | 0.251743462 |
| 394.9024 | 429.1868 | 414.9901 | -0.20195 | 0.373011749 |    | 0.433949395 |
| 0        | 0        | 0        | #NUM!    | NA          | NA |             |
| 4.467221 | 11.14771 | 1.047955 | -0.06595 | 0.594712518 | NA |             |
| 2188.938 | 2127.354 | 2160.883 | 0.096396 | 0.268223584 |    | 0.599614212 |
| 1321.404 | 1369.31  | 1536.302 | -0.20811 | 0.621093622 |    | 0.325427264 |
| 1014.059 | 1009.797 | 958.8787 | 0.177018 | 0.413905026 |    | 0.353465216 |
| 308.2383 | 336.2892 | 287.1396 | -0.11628 | 0.555044592 |    | 0.682436785 |
| 709.3947 | 735.7488 | 710.5134 | 0.144591 | 0.203841572 |    | 0.610317713 |
| 4276.918 | 4185.036 | 3661.554 | 0.111502 | 0.187509131 |    | 0.515247485 |
| 14554.21 | 14600.71 | 15600.9  | -0.27241 | 0.936346196 |    | 0.027333973 |
| 0.893444 | 2.786927 | 0        | 0.482594 | NA          | NA |             |
| 461.9107 | 480.2805 | 543.8886 | 0.016448 | 0.378784486 |    | 0.952761149 |
| 11.61478 | 5.573855 | 12.57546 | 0.538381 | 0.972370311 | NA |             |
| 1170.412 | 1190.947 | 1153.798 | 0.06215  | 0.857370872 |    | 0.729827413 |
| 811.2474 | 796.1322 | 779.6784 | 0.306927 | 0.494492788 |    | 0.061045315 |
| 1674.315 | 1590.407 | 1615.946 | -0.13028 | 0.003735039 |    | 0.38935837  |
| 4472.582 | 4388.481 | 4013.667 | -0.01055 | 0.454541325 |    | 0.961026715 |
| 853.2393 | 860.2316 | 837.316  | 0.294045 | 0.412158288 |    | 0.060691739 |
| 49.13943 | 66.88625 | 56.58956 | -0.29633 | 0.618280897 |    | 0.575540189 |
| 641.493  | 625.2007 | 615.1495 | 0.117522 | 0.935100162 |    | 0.502996806 |

|           |           |           |           |              |              |
|-----------|-----------|-----------|-----------|--------------|--------------|
| 6. 25411  | 1. 857952 | 9. 431594 | -0. 32468 | 0. 938838346 | NA           |
| 0         | 0         | 0         | #NUM!     | NA           | NA           |
| 0         | 0         | 3. 143865 | -0. 10142 | NA           | NA           |
| 0         | 0         | 0         | #NUM!     | NA           | NA           |
| 238. 5496 | 233. 1729 | 212. 7348 | -0. 30901 | 0. 835449534 | 0. 229480039 |
| 600. 3945 | 589. 8996 | 517. 6897 | 0. 069098 | 0. 991590779 | 0. 836257824 |
| 19711. 17 | 19597. 67 | 20091. 39 | -0. 20509 | 0. 868269106 | 0. 053731064 |
| 1340. 166 | 1324. 719 | 1315. 183 | 0. 078471 | 0. 779325825 | 0. 68795231  |
| 0         | 1. 857952 | 2. 09591  | 1. 229302 | NA           | NA           |
| 1777. 061 | 1724. 179 | 1863. 264 | 0. 049569 | 0. 504339531 | 0. 838059844 |
| 619. 1569 | 470. 9907 | 558. 56   | -0. 04998 | 0. 323363221 | 0. 851146657 |
| 354. 6974 | 404. 1045 | 450. 6206 | 0. 103512 | 0. 84602472  | 0. 713323797 |
| 0. 893444 | 0         | 0         | -2. 39209 | NA           | NA           |
| 2355. 119 | 2234. 187 | 2568. 537 | -0. 29291 | 0. 882057909 | 0. 033645271 |
| 64. 32799 | 55. 73855 | 57. 63752 | -0. 33972 | 0. 362841481 | 0. 489722452 |
| 378. 8204 | 438. 4766 | 396. 1269 | 0. 087109 | 0. 732718278 | 0. 739117108 |
| 4187. 573 | 4103. 286 | 4433. 897 | 0. 021375 | 0. 235856061 | 0. 923725803 |
| 93. 81165 | 85. 46577 | 64. 9732  | -0. 1465  | 0. 675005225 | 0. 806564543 |
| 2251. 48  | 2153. 366 | 2057. 135 | -0. 01725 | 0. 000445095 | 0. 923725803 |
| 3363. 818 | 3385. 188 | 3085. 179 | 0. 142625 | 0. 290962131 | 0. 515558505 |
| 861. 2803 | 866. 7344 | 963. 0705 | -0. 28635 | 0. 187777748 | 0. 088148215 |
| 2253. 266 | 2223. 039 | 2105. 341 | 0. 121405 | 0. 136711904 | 0. 348491003 |
| 10. 72133 | 9. 289758 | 4. 19182  | -0. 57446 | 0. 777234647 | NA           |
| 434. 2139 | 396. 6727 | 444. 3329 | 0. 238544 | 0. 265804194 | 0. 335635384 |
| 755. 8538 | 823. 0725 | 779. 6784 | -0. 02289 | 0. 187777748 | 0. 933856082 |
| 1003. 338 | 928. 0468 | 949. 4471 | 0. 031349 | 0. 962660515 | 0. 875604624 |
| 1327. 658 | 1328. 435 | 1282. 697 | -0. 01762 | 0. 001226703 | 0. 941511899 |
| 1291. 027 | 1186. 302 | 1098. 257 | 0. 044297 | 0. 270719269 | 0. 847133587 |
| 534. 2797 | 452. 4112 | 493. 5868 | 0. 08918  | 0. 905394249 | 0. 708596546 |
| 101. 8526 | 101. 2584 | 68. 11707 | -0. 29599 | 0. 552891956 | 0. 549038919 |
| 686. 1652 | 663. 2887 | 788. 0621 | 0. 067461 | 0. 757279972 | 0. 775439768 |
| 154. 5659 | 170. 0026 | 195. 9676 | 0. 342374 | 0. 967813477 | 0. 484163033 |
| 1275. 838 | 1264. 336 | 1393. 78  | 0. 02825  | 0. 948234757 | 0. 914120833 |
| 292. 1563 | 253. 6104 | 358. 4006 | -0. 18791 | 0. 982305383 | 0. 570700534 |
| 723. 6898 | 706. 0216 | 715. 7532 | 0. 181017 | 0. 573411006 | 0. 33908301  |
| 7. 147554 | 0         | 0         | -1. 33412 | NA           | NA           |
| 26236. 88 | 25632. 3  | 27680. 68 | -0. 45516 | 0. 918350023 | 0. 001491463 |
| 4553. 885 | 4621. 654 | 4425. 514 | 0. 025852 | 0. 02221007  | 0. 881988452 |
| 5619. 764 | 5590. 576 | 5172. 705 | -0. 00818 | 0. 86365129  | 0. 964158522 |
| 1. 786889 | 0         | 3. 143865 | -1. 60673 | NA           | NA           |
| 997. 9772 | 926. 1888 | 993. 4612 | 0. 086204 | 0. 708719765 | 0. 708596546 |
| 301. 0907 | 365. 0875 | 357. 3526 | 0. 044917 | 0. 398426428 | 0. 911997158 |
| 356. 4843 | 303. 7751 | 470. 5317 | -0. 28224 | 0. 720532728 | 0. 278856737 |
| 2. 680333 | 2. 786927 | 3. 143865 | 0. 611166 | NA           | NA           |
| 16977. 23 | 17454. 53 | 18441. 91 | -0. 37258 | 0. 814318858 | 0. 00657616  |
| 612. 9028 | 722. 7431 | 651. 8279 | 0. 241411 | 0. 378784486 | 0. 187946773 |
| 665. 616  | 607. 5501 | 694. 7941 | 0. 178275 | 0. 910682739 | 0. 358153185 |
| 945. 264  | 869. 5213 | 988. 2215 | 0. 057888 | 0. 58371648  | 0. 795108707 |
| 1364. 289 | 1491. 935 | 1439. 89  | -0. 3591  | 0. 638519612 | 0. 020113967 |
| 394. 0089 | 353. 9398 | 293. 4274 | 0. 175124 | 0. 935100162 | 0. 579998211 |
| 628. 9848 | 694. 8739 | 599. 4302 | 0. 132693 | 0. 684623494 | 0. 575540189 |
| 857. 7065 | 739. 4647 | 765. 0071 | 0. 218613 | 0. 745767703 | 0. 43545502  |
| 0         | 5. 573855 | 4. 19182  | 0. 41512  | NA           | NA           |
| 627. 1979 | 765. 476  | 651. 8279 | 0. 24158  | 0. 601191315 | 0. 214445591 |

|          |          |          |             |             |             |
|----------|----------|----------|-------------|-------------|-------------|
| 258.2054 | 272.1899 | 257.7969 | -0.66553    | 0.759611543 | 0.000220628 |
| 1397.347 | 1221.603 | 1268.025 | -0.29215    | 0.411467295 | 0.027121839 |
| 1379.478 | 1357.234 | 1456.657 | 0.1881      | 0.572336545 | 0.250564669 |
| 960.4526 | 1014.442 | 938.9676 | 0.107311    | 0.577190434 | 0.613454546 |
| 427.9598 | 547.1667 | 581.615  | -0.11124    | 0.947853941 | 0.708596546 |
| 24380.31 | 24117.14 | 25821.61 | -0.32265    | 0.716063981 | 0.006052647 |
| 3412.064 | 3355.46  | 3035.925 | -0.04401    | 0.084125911 | 0.839088125 |
| 427.9598 | 410.6073 | 404.5106 | 0.087053    | 0.584165589 | 0.819004    |
| 510.1567 | 480.2805 | 411.8463 | -0.14876    | 0.477428994 | 0.606332686 |
| 844.3048 | 906.6803 | 865.6107 | 0.188543    | 0.489329504 | 0.289910731 |
| 720.1161 | 813.7828 | 653.9239 | 0.321337    | 0.63359404  | 0.071096214 |
| 2469.48  | 2531.459 | 2701.628 | -0.45231    | 0.820929887 | 0.008985522 |
| 277.8612 | 255.4683 | 245.2214 | 0.005023    | 0.925846914 | 0.999397196 |
| 1033.715 | 907.6093 | 1061.578 | -0.17868    | 0.638519612 | 0.446369682 |
| 1048.904 | 864.8764 | 1033.284 | 0.070576    | 0.487260716 | 0.764996976 |
| 206.3856 | 227.5991 | 300.7631 | 0.03693     | 0.649131648 | 0.925883666 |
| 746.026  | 722.7431 | 593.1425 | 0.202609    | 0.713210135 | 0.374485512 |
| 779.0834 | 868.5923 | 876.0903 | -0.10668    | 0.944990108 | 0.61728503  |
| 975.6411 | 1075.754 | 950.4951 | 0.343949    | 0.518134411 | 0.022241758 |
| 3311.104 | 3152.944 | 3193.119 | -0.04063    | 0.187777748 | 0.786995178 |
| 44.67221 | 61.3124  | 63.92525 | -0.37812    | 0.187777748 | 0.434560808 |
| 5.360666 | 5.573855 | 4.19182  | 1.199806 NA | NA          |             |
| 1845.856 | 1818.006 | 1615.946 | 0.209085    | 0.094557838 | 0.394044776 |
| 583.4191 | 549.9537 | 538.6488 | 0.007421    | 0.287050142 | 0.974691849 |
| 675.4439 | 594.5445 | 580.567  | 0.083058    | 0.330281656 | 0.729293105 |
| 499.4353 | 535.09   | 486.2511 | 0.429768    | 0.899527569 | 0.009159478 |
| 1112.338 | 1048.814 | 1194.669 | 0.008778    | 0.928104954 | 0.976136838 |
| 2597.242 | 2595.558 | 2490.989 | -0.04146    | 0.112700802 | 0.797601985 |
| 4.467221 | 4.644879 | 5.239774 | 0.212868 NA | NA          |             |
| 1461.675 | 1543.958 | 1550.973 | 0.24561     | 0.108117004 | 0.139151972 |
| 0        | 7.431806 | 2.09591  | -0.2429 NA  | NA          |             |
| 3925.794 | 3847.818 | 4014.715 | -0.10781    | 0.352157146 | 0.393779503 |
| 3.573777 | 0        | 0        | -1.03515 NA | NA          |             |
| 197.4512 | 168.1446 | 197.0155 | 0.49098     | 0.608209302 | 0.143013287 |
| 252.8447 | 313.9938 | 277.708  | 0.009097    | 0.785492922 | 0.990142758 |
| 20425.92 | 21359.01 | 21842.52 | -0.28771    | 0.809173332 | 0.027121839 |
| 140.2707 | 140.2753 | 160.3371 | 0.241712    | 0.706962639 | 0.574986893 |
| 32.16399 | 29.72722 | 56.58956 | -0.23701    | 0.834965572 | 0.792240634 |
| 461.9107 | 418.0391 | 414.9901 | -0.10859    | 0.892614393 | 0.672161194 |
| 292.1563 | 293.5563 | 331.1537 | 0.099632    | 0.458486853 | 0.751940308 |
| 1.786889 | 2.786927 | 9.431594 | #DIV/0! NA  | NA          |             |
| 165.2872 | 138.4174 | 148.8096 | -0.33529    | 0.817609984 | 0.359873864 |
| 1232.06  | 1143.569 | 1248.114 | 0.19736     | 0.666493976 | 0.224223422 |
| 3211.039 | 3322.946 | 3022.302 | 0.074276    | 0.00311479  | 0.715956488 |
| 716.5423 | 749.6834 | 717.8491 | 0.102894    | 0.734144448 | 0.662690338 |
| 5454.477 | 5150.242 | 5193.664 | 0.022418    | 0.010810987 | 0.897900971 |
| 355.5908 | 339.0762 | 440.1411 | -0.7514     | 0.310443697 | 6.15961E-06 |
| 498.5419 | 433.8317 | 450.6206 | -0.07453    | 0.40292054  | 0.786000778 |
| 703.1406 | 630.7745 | 801.6855 | 0.137882    | 0.766760576 | 0.537032146 |
| 0        | 0        | 0        | #NUM! NA    | NA          |             |
| 1333.019 | 1412.043 | 1264.882 | 0.259042    | 0.243847797 | 0.141040456 |
| 497.6485 | 577.8229 | 431.7574 | 0.149262    | 0.337428805 | 0.600875554 |
| 1450.06  | 1544.887 | 1567.741 | 0.028754    | 0.754774366 | 0.880577976 |
| 796.9523 | 671.6495 | 669.6432 | 0.097295    | 0.556307283 | 0.672747744 |

|          |          |          |             |                |             |
|----------|----------|----------|-------------|----------------|-------------|
| 2020.077 | 2126.426 | 2001.594 | -0.05453    | 0.683501136    | 0.763587743 |
| 4664.672 | 4491.598 | 4196.011 | 0.072621    | 0.00256492     | 0.640018073 |
| 0.893444 | 0        | 0        | -0.91651 NA | NA             |             |
| 1823.52  | 2002.872 | 1876.887 | 0.032745    | 0.787054981    | 0.86393308  |
| 3370.965 | 3485.517 | 3729.671 | -0.32801    | 0.090068897    | 0.025777316 |
| 646.8536 | 618.6979 | 636.1086 | 0.046721    | 0.865576104    | 0.82472084  |
| 1626.069 | 1608.986 | 1512.199 | 0.105628    | 0.494492788    | 0.495089963 |
| 1883.38  | 1956.423 | 1785.715 | -0.03091    | 0.157100667    | 0.868461891 |
| 2233.611 | 2068.829 | 1817.154 | 0.054672    | 0.730407446    | 0.836841581 |
| 158.1396 | 188.5821 | 161.3851 | -0.23319    | 0.351446149    | 0.469810501 |
| 411.8778 | 446.8373 | 421.2779 | 0.073652    | 0.791941475    | 0.795076358 |
| 623.6241 | 672.5785 | 528.1693 | 0.099497    | 0.478531557    | 0.739346002 |
| 461.0172 | 416.1811 | 519.7856 | -0.01856    | 0.075531813    | 0.961142155 |
| 555.7223 | 557.3855 | 504.0663 | 0.373199    | 0.871801928    | 0.108399569 |
| 138.4839 | 100.3294 | 122.6107 | 0.265314    | 0.220715145    | 0.558104763 |
| 753.1735 | 801.7061 | 760.8153 | 0.058628    | 0.363948776    | 0.764338813 |
| 18.76233 | 16.72156 | 26.19887 | -0.44358    | 0.918350023 NA |             |
| 4708.451 | 4463.729 | 4308.143 | 0.054035    | 0.354108154    | 0.710256666 |
| 19.65577 | 20.43747 | 23.05501 | -0.60906    | 0.770381061 NA |             |
| 1027.461 | 1044.169 | 909.6248 | 0.09252     | 0.596065856    | 0.710256666 |
| 385.9679 | 343.721  | 308.0987 | 0.096036    | 0.517968435    | 0.764996976 |
| 1527.79  | 1518.875 | 1458.753 | 0.032067    | 0.505612976    | 0.86344732  |
| 0        | 0        | 0        | #NUM! NA    | NA             |             |
| 0        | 0        | 0        | #NUM! NA    | NA             |             |
| 0        | 0.928976 | 0        | #DIV/0! NA  | NA             |             |
| 8.934443 | 12.07668 | 16.76728 | -0.55176    | 0.603004299 NA |             |
| 9.827887 | 25.08235 | 15.71932 | -0.4948     | 0.426735737 NA |             |
| 10.72133 | 15.79259 | 13.62341 | 0.248928    | 0.953403647 NA |             |
| 452.0828 | 510.9367 | 418.134  | -0.14301    | 0.453095561    | 0.609543168 |
| 453.8697 | 540.6639 | 563.7997 | 0.159391    | 0.601338342    | 0.505493145 |
| 0.893444 | 1.857952 | 2.09591  | #DIV/0! NA  | NA             |             |
| 2.680333 | 0.928976 | 2.09591  | 0.115025 NA | NA             |             |
| 5010.435 | 4889.199 | 5438.886 | -0.1266     | 0.80496489     | 0.4158179   |
| 273.3939 | 271.2609 | 254.653  | 0.000199    | 0.686653189    | 0.997242119 |
| 0        | 0        | 1.047955 | #DIV/0! NA  | NA             |             |
| 1.786889 | 3.715903 | 1.047955 | -0.08627 NA | NA             |             |
| 35.73777 | 31.58518 | 17.81523 | -0.74821    | 0.670790001 NA |             |
| 1303.535 | 1362.807 | 1486     | -0.34527    | 0.369892369    | 0.002315134 |
| 3206.571 | 3442.784 | 3390.134 | -0.3252     | 0.80037736     | 0.029788115 |
| 26.80333 | 6.50283  | 22.00705 | 0.415567    | 0.732140966 NA |             |
| 2285.43  | 2435.774 | 2017.313 | 0.00915     | 0.184558164    | 0.983469507 |
| 441.3615 | 478.4225 | 559.6079 | -0.1748     | 0.570597858    | 0.571802385 |
| 21.44266 | 31.58518 | 22.00705 | -0.62099    | 0.979366541 NA |             |
| 0        | 0        | 1.047955 | #DIV/0! NA  | NA             |             |
| 20.54922 | 19.50849 | 16.76728 | -0.42709    | 0.2768804 NA   |             |
| 0        | 0.928976 | 0        | -1.50354 NA | NA             |             |
| 916.6738 | 788.7004 | 818.4528 | 0.062187    | 0.132511083    | 0.765887785 |
| 3.573777 | 0.928976 | 1.047955 | 1.075415 NA | NA             |             |
| 45.56566 | 47.37776 | 58.68547 | -0.09937    | 0.004092287    | 0.87466351  |
| 390.4351 | 433.8317 | 405.5585 | -0.1769     | 0.26155741     | 0.509930639 |
| 1165.945 | 1094.333 | 968.3103 | 0.118643    | 0.521198556    | 0.583691606 |
| 2624.046 | 2775.78  | 2285.59  | 0.165031    | 0.111482683    | 0.758294944 |
| 630.7716 | 638.2063 | 660.2116 | 0.008227    | 0.927256678    | 0.985850238 |
| 30428.92 | 30829.92 | 31571.74 | -0.31842    | 0.736589995    | 0.029788115 |

|          |          |          |             |                |             |
|----------|----------|----------|-------------|----------------|-------------|
| 126.8691 | 156.0679 | 142.5219 | -0.45245    | 0.022050761    | 0.142039527 |
| 902.3787 | 962.4189 | 1081.489 | -0.18261    | 0.410903637    | 0.324718738 |
| 4.467221 | 1.857952 | 2.09591  | -0.42103 NA | NA             |             |
| 127.7625 | 137.4884 | 164.5289 | 0.083691    | 0.622518586    | 0.86814025  |
| 9.827887 | 12.07668 | 6.287729 | -0.63346    | 0.430461737 NA |             |
| 75.04932 | 88.2527  | 82.78844 | 0.085153    | 0.713312904    | 0.89773245  |
| 5.360666 | 4.644879 | 4.19182  | 0.359478 NA | NA             |             |
| 1089.109 | 931.7627 | 952.591  | -0.06425    | 0.649302498    | 0.793207865 |
| 12755.7  | 12830.08 | 15606.14 | -0.51303    | 0.557551669    | 0.000230052 |
| 1307.109 | 1317.288 | 1323.567 | 0.156195    | 0.384189305    | 0.402824474 |
| 3591.646 | 3467.867 | 3708.712 | -0.0012     | 0.505612976    | 0.996992829 |
| 37.52466 | 10.21873 | 19.91114 | 0.241526    | 0.764243604 NA |             |
| 183.1561 | 166.2867 | 168.7207 | -0.12573    | 0.26155741     | 0.752110266 |
| 221.5742 | 212.7354 | 225.3103 | 0.13843     | 0.803497374    | 0.80286002  |
| 216.2135 | 241.5337 | 243.1255 | 0.220543    | 0.728952588    | 0.422560599 |
| 3130.629 | 3322.017 | 3267.523 | -0.07015    | 0.000198278    | 0.601096936 |
| 1681.462 | 1623.85  | 1456.657 | 0.282051    | 0.503345543    | 0.134770011 |
| 551.2551 | 626.1297 | 559.6079 | 0.115654    | 0.817609984    | 0.681942449 |
| 0        | 0        | 0        | #NUM! NA    | NA             |             |
| 2377.455 | 2332.658 | 2350.563 | 0.170068    | 0.682184622    | 0.146298537 |
| 797.8457 | 787.7714 | 857.2271 | -0.23817    | 0.963492814    | 0.161107365 |
| 0        | 1.857952 | 0        | #DIV/0! NA  | NA             |             |
| 414.5581 | 396.6727 | 418.134  | 0.109512    | 0.872444605    | 0.664227919 |
| 8.040998 | 5.573855 | 2.09591  | 0.505608 NA | NA             |             |
| 210.8528 | 189.5111 | 186.536  | 0.021792    | 0.831470267    | 0.972817917 |
| 1308.002 | 1150.072 | 1305.752 | 0.080135    | 0.967813477    | 0.765789524 |
| 11.61478 | 18.57952 | 15.71932 | 0.440852    | 0.959739969 NA |             |
| 491.3943 | 471.9197 | 457.9563 | 0.010025    | 0.968417488    | 0.988370025 |
| 2406.045 | 2589.984 | 2662.853 | -0.23238    | 3.36957E-07    | 0.038166749 |
| 3.573777 | 3.715903 | 4.19182  | 0.102149 NA | NA             |             |
| 90.23787 | 109.6191 | 67.06911 | 0.116235    | 0.96940125     | 0.864363898 |
| 461.0172 | 364.1585 | 321.7222 | 0.434469    | 0.162448502    | 0.176169028 |
| 442.2549 | 409.6783 | 451.6686 | -0.09339    | 0.380498844    | 0.731268074 |
| 673.657  | 619.6268 | 705.2736 | 0.466242    | 0.43802737     | 0.009491168 |
| 318.9596 | 281.4797 | 361.5444 | 0.12194     | 0.80107822     | 0.746009092 |
| 0        | 1.857952 | 0        | -0.86025 NA | NA             |             |
| 846.0917 | 1067.393 | 1057.386 | -0.0722     | 0.551840208    | 0.738713732 |
| 1891.421 | 2024.238 | 1721.79  | -0.02747    | 0.760924499    | 0.91372954  |
| 579.8453 | 669.7915 | 723.0889 | 0.432131    | 0.393551305    | 0.016825284 |
| 293.9432 | 375.3062 | 417.086  | -0.20413    | 0.545771146    | 0.481380095 |
| 204.5987 | 235.0309 | 237.8858 | 0.116954    | 0.962011634    | 0.724404377 |
| 634.3454 | 675.3654 | 638.2045 | 0.169874    | 0.358629856    | 0.402824474 |
| 403.8368 | 350.2239 | 379.3597 | 0.297895    | 0.976681492    | 0.502421025 |
| 695.9931 | 651.212  | 598.3822 | 0.060502    | 0.485974888    | 0.86758766  |
| 6.25411  | 1.857952 | 0        | 1.037849 NA | NA             |             |
| 1094.469 | 1188.16  | 975.646  | 0.17504     | 0.218419472    | 0.291835413 |
| 1146.289 | 1203.953 | 1126.552 | -0.05082    | 0.72034461     | 0.775439768 |
| 2.680333 | 0.928976 | 0        | -2.11131 NA | NA             |             |
| 159.9265 | 160.7128 | 183.3921 | 0.317383    | 0.995299355    | 0.426846696 |
| 397.5827 | 411.5363 | 355.2567 | -0.00535    | 0.998398411    | 0.999234423 |
| 8.934443 | 2.786927 | 8.383639 | 1.742878 NA | NA             |             |
| 17918.02 | 17135.89 | 16877.31 | -0.15849    | 0.395739876    | 0.107848818 |
| 681.698  | 648.4251 | 494.6347 | 0.167357    | 0.335900008    | 0.547201181 |
| 472.632  | 528.5872 | 461.1002 | -0.15817    | 0.968581517    | 0.41087768  |

|          |          |          |          |             |             |
|----------|----------|----------|----------|-------------|-------------|
| 501.2222 | 625.2007 | 574.2793 | -0.05297 | 0.881060269 | 0.866936111 |
| 1769.02  | 1799.426 | 1644.241 | 0.17143  | 0.764235559 | 0.167165088 |
| 995.2969 | 1083.186 | 1075.202 | 0.185897 | 0.344730624 | 0.300952186 |
| 8.934443 | 18.57952 | 11.5275  | -0.82759 | 0.859748112 | NA          |
| 1.786889 | 0        | 2.09591  | 0.203136 | NA          | NA          |
| 469.9517 | 526.7293 | 577.4231 | -0.00688 | 0.811082292 | 0.987875073 |
| 738.8784 | 799.8481 | 877.1382 | 0.031921 | 0.947037414 | 0.915422831 |
| 723.6898 | 762.6891 | 707.3696 | 0.062249 | 0.242151376 | 0.842118027 |
| 854.1327 | 695.8028 | 861.4189 | -0.10231 | 0.799806234 | 0.686433182 |
| 965.8132 | 1003.294 | 765.0071 | -0.09243 | 0.268706533 | 0.756407952 |
| 162.6069 | 148.6361 | 107.9394 | 0.271444 | 0.775670478 | 0.538616173 |
| 1026.567 | 1031.163 | 866.6587 | 0.301627 | 0.252640265 | 0.337040194 |
| 0        | 5.573855 | 0        | 0.367504 | NA          | NA          |
| 27262.56 | 27058.28 | 29883.48 | -0.38024 | 0.70754392  | 0.016940762 |
| 1420.576 | 1402.753 | 1329.855 | -0.08874 | 0.453550494 | 0.706703794 |
| 1.786889 | 0.928976 | 1.047955 | 0.51494  | NA          | NA          |
| 7.147554 | 2.786927 | 15.71932 | -0.57838 | 0.798043362 | NA          |
| 820.1818 | 785.9135 | 686.4105 | 0.112548 | 0.344738271 | 0.558104763 |
| 3315.572 | 3343.384 | 3163.776 | 0.02716  | 0.910726255 | 0.875929853 |
| 13.40166 | 4.644879 | 27.24683 | -0.43102 | 0.837139541 | NA          |
| 0.893444 | 0.928976 | 0        | -0.5314  | NA          | NA          |
| 1277.625 | 1145.427 | 1028.044 | 0.080297 | 0.2758693   | 0.81253834  |
| 4126.819 | 4125.581 | 3821.891 | 0.069557 | 0.358629856 | 0.669238482 |
| 6.25411  | 1.857952 | 4.19182  | 0.748442 | NA          | NA          |
| 824.6491 | 850.9418 | 809.0212 | 0.238611 | 0.323780681 | 0.176171477 |
| 634.3454 | 671.6495 | 585.8068 | 0.148732 | 0.817609984 | 0.439411562 |
| 1335.699 | 1172.367 | 1306.8   | -0.12182 | 0.000591296 | 0.471424918 |
| 16824.45 | 16543.2  | 18147.43 | -0.34518 | 0.794039558 | 0.010218325 |
| 5.360666 | 2.786927 | 1.047955 | #DIV/0!  | NA          | NA          |
| 3.573777 | 10.21873 | 10.47955 | 1.371688 | 0.869438043 | NA          |
| 3.573777 | 0.928976 | 0        | 1.77355  | NA          | NA          |
| 2638.341 | 2440.419 | 2685.908 | 0.090329 | 0.92288341  | 0.554997306 |
| 40158.53 | 40657.55 | 38826.73 | -0.33459 | 0.579191948 | 0.007913336 |
| 1440.232 | 1391.606 | 1457.705 | -0.09216 | 0.184558164 | 0.620926433 |
| 394.9024 | 428.2578 | 387.7433 | -0.10028 | 0.892614393 | 0.690294956 |
| 867.5344 | 871.3793 | 899.1453 | 0.080741 | 0.755175799 | 0.659046549 |
| 1400.921 | 1316.359 | 1175.805 | 0.415885 | 0.733488302 | 0.04967295  |
| 2287.217 | 2212.82  | 1858.024 | -0.02944 | 0.014189422 | 0.921848549 |
| 8248.277 | 7990.121 | 7830.319 | -0.00236 | 0.999122571 | 0.990142758 |
| 201.9184 | 237.8178 | 241.0296 | -0.07607 | 0.072773765 | 0.809142313 |
| 8.040998 | 12.07668 | 12.57546 | -0.01512 | 0.340833229 | NA          |
| 1.786889 | 0        | 0        | 0.440193 | NA          | NA          |
| 909.5263 | 890.8878 | 972.5021 | 0.187301 | 0.0444701   | 0.193131605 |
| 2554.357 | 2479.436 | 2787.56  | -0.3536  | 0.835283405 | 0.003563456 |
| 148.3117 | 133.7725 | 142.5219 | -0.33962 | 0.410903637 | 0.353286634 |
| 0        | 1.857952 | 2.09591  | 0.586005 | NA          | NA          |
| 1896.782 | 1847.733 | 2158.787 | -0.16321 | 0.732140966 | 0.367518225 |
| 1723.454 | 1717.676 | 1483.904 | 0.168444 | 0.017930836 | 0.503999921 |
| 0.893444 | 0        | 0        | -0.91651 | NA          | NA          |
| 1707.372 | 1893.253 | 1608.611 | 0.19998  | 0.036816142 | 0.35622113  |
| 0        | 0        | 2.09591  | -1.27135 | NA          | NA          |
| 552.1486 | 501.6469 | 548.0804 | 0.111809 | 0.59039068  | 0.688084851 |
| 0        | 0.928976 | 2.09591  | -2.17923 | NA          | NA          |
| 389.5417 | 457.0561 | 364.6883 | -0.00606 | 0.976830702 | 0.996992829 |

|          |          |          |          |             |    |             |
|----------|----------|----------|----------|-------------|----|-------------|
| 0.893444 | 0        | 1.047955 | 0.203136 | NA          | NA |             |
| 8040.998 | 7858.206 | 9845.536 | 0.41716  | 0.425091186 |    | 0.055098956 |
| 1137.355 | 1270.839 | 1073.106 | 0.074599 | 0.886746968 |    | 0.713405771 |
| 623.6241 | 495.1441 | 504.0663 | 0.206985 | 0.864963799 |    | 0.379704424 |
| 200.1315 | 173.7185 | 207.4951 | -0.10015 | 0.603586196 |    | 0.822050288 |
| 8.040998 | 3.715903 | 9.431594 | -0.32275 | 0.756540804 | NA |             |
| 2926.923 | 3025.674 | 3368.127 | -0.19188 | 0.220715145 |    | 0.192993665 |
| 47.35255 | 38.08801 | 45.06206 | -0.26059 | 0.711398577 |    | 0.734906514 |
| 2165.709 | 2391.184 | 2494.133 | -0.16213 | 0.740229545 |    | 0.373348081 |
| 0        | 1.857952 | 0        | #DIV/0!  | NA          |    |             |
| 4310.869 | 4434.93  | 4643.488 | -0.06872 | 0.051055002 |    | 0.600056926 |
| 0        | 1.857952 | 0        | #DIV/0!  | NA          |    |             |
| 1.786889 | 0        | 0        | #DIV/0!  | NA          |    |             |
| 1.786889 | 0        | 0        | #DIV/0!  | NA          |    |             |
| 897.9115 | 872.3082 | 819.5007 | 0.147666 | 0.014083611 |    | 0.481884668 |
| 436.8942 | 455.1981 | 545.9845 | 0.376826 | 0.599211134 |    | 0.042179555 |
| 3657.761 | 3518.031 | 3644.787 | -0.17159 | 0.010114821 |    | 0.118990473 |
| 670.0832 | 681.8682 | 658.1157 | 0.250844 | 0.37602059  |    | 0.13275794  |
| 671.8701 | 579.6809 | 528.1693 | -0.19797 | 3.20007E-05 |    | 0.392697207 |
| 551.2551 | 496.0731 | 505.1143 | -0.0354  | 0.882057909 |    | 0.91372954  |
| 12.50822 | 33.44313 | 20.9591  | 2.120566 | 0.729363614 | NA |             |
| 250.1644 | 252.6814 | 228.4542 | 0.128096 | 0.804018865 |    | 0.666556565 |
| 2497.177 | 2535.175 | 2571.681 | 0.255223 | 0.522361449 |    | 0.023809238 |
| 516.4108 | 487.7123 | 538.6488 | 0.111833 | 0.457830725 |    | 0.673302041 |
| 855.9196 | 1027.447 | 1013.372 | -0.09628 | 0.74589429  |    | 0.626119342 |
| 705.821  | 575.965  | 664.4034 | 0.017855 | 0.577332911 |    | 0.945439187 |
| 647.7471 | 613.124  | 572.1834 | 0.047512 | 0.812875146 |    | 0.831655346 |
| 1278.519 | 1266.194 | 1075.202 | -0.21385 | 0.506893267 |    | 0.20379563  |
| 1339.273 | 1335.867 | 1717.598 | -0.25865 | 0.962011634 |    | 0.239315229 |
| 698.6734 | 750.6124 | 755.5755 | -0.16866 | 0.992476114 |    | 0.446951468 |
| 2303.299 | 2455.283 | 2509.852 | -0.02287 | 0.558928437 |    | 0.918341317 |
| 1163.264 | 1129.635 | 1094.065 | 0.020675 | 0.118929144 |    | 0.924858067 |
| 9.827887 | 18.57952 | 20.9591  | 0.37204  | 0.922856432 | NA |             |
| 448.509  | 405.9624 | 365.7363 | 0.255351 | 0.967934287 |    | 0.301903647 |
| 468.1648 | 446.8373 | 487.299  | -0.09754 | 0.753964428 |    | 0.655129754 |
| 0.893444 | 0        | 4.19182  | #DIV/0!  | NA          |    |             |
| 0.893444 | 0        | 0        | #DIV/0!  | NA          |    |             |
| 317.1727 | 332.5733 | 251.5092 | 0.299114 | 0.005435534 |    | 0.266775275 |
| 0.893444 | 0        | 0        | #DIV/0!  | NA          |    |             |
| 5.360666 | 9.289758 | 5.239774 | 0.727381 | 0.868137167 | NA |             |
| 588.7798 | 564.8173 | 555.4161 | 0.242418 | 0.864963799 |    | 0.208112627 |
| 0.893444 | 0        | 1.047955 | -0.62951 | NA          |    |             |
| 2621.365 | 2515.666 | 2324.364 | 0.172976 | 0.112535001 |    | 0.383494766 |
| 21968.9  | 21684.15 | 19588.37 | -0.2022  | 0.430087902 |    | 0.178134034 |
| 34672.78 | 35183.1  | 35914.46 | -0.44015 | 0.783200259 |    | 0.010243246 |
| 747.8128 | 773.8368 | 754.5275 | 0.12388  | 0.57058689  |    | 0.511122414 |
| 801.4195 | 954.0581 | 1101.401 | 0.044219 | 0.973007344 |    | 0.881988452 |
| 0        | 0.928976 | 0        | #DIV/0!  | NA          |    |             |
| 359.1646 | 359.5136 | 350.0169 | 0.275462 | 0.684723286 |    | 0.23616229  |
| 192.984  | 181.1503 | 177.1044 | -0.04403 | 0.098114491 |    | 0.923725803 |
| 2112.102 | 2249.979 | 2302.357 | -0.15069 | 0.769710962 |    | 0.348491003 |
| 5361.559 | 4993.245 | 5595.031 | 0.012771 | 0.759261525 |    | 0.938440797 |
| 4.467221 | 0        | 0        | #DIV/0!  | NA          |    |             |
| 1199.896 | 1141.711 | 1257.546 | -0.14898 | 0.283674866 |    | 0.386078627 |

|          |          |          |          |             |             |
|----------|----------|----------|----------|-------------|-------------|
| 114.3609 | 96.61348 | 118.4189 | 0.097244 | 0.642246351 | 0.844024501 |
| 0.893444 | 3.715903 | 9.431594 | -0.33012 | 0.907411185 | NA          |
| 1761.872 | 1703.742 | 1713.406 | 0.062407 | 0.988049891 | 0.764162229 |
| 259.9923 | 274.0478 | 308.0987 | -0.00832 | 0.249012381 | 0.990023409 |
| 547.6813 | 553.6696 | 650.78   | 0.032362 | 0.618280897 | 0.915422831 |
| 4381.451 | 4397.771 | 4213.827 | -0.06185 | 0.170750865 | 0.601613256 |
| 25425.64 | 25227.27 | 25754.54 | -0.31131 | 0.525774075 | 0.018025328 |
| 620.0503 | 641.9223 | 505.1143 | -0.00577 | 0.598960113 | 0.988943755 |
| 364.5253 | 419.897  | 323.8181 | 0.089571 | 0.389352673 | 0.773113821 |
| 1056.051 | 1082.257 | 1173.709 | -0.12834 | 0.504924333 | 0.386225205 |
| 0        | 0        | 0        | #NUM!    | NA          |             |
| 2264.881 | 2498.945 | 2221.664 | 0.061097 | 0.027170262 | 0.764793691 |
| 96.49198 | 88.2527  | 113.1791 | 0.244108 | 0.29215357  | 0.61955727  |
| 870.2147 | 826.7884 | 947.3512 | -0.14841 | 0.617342557 | 0.540291582 |
| 137.5904 | 117.9799 | 143.5698 | 0.547286 | 0.596427641 | 0.253693985 |
| 427.0664 | 372.5193 | 343.7292 | 0.082565 | 0.863679003 | 0.783429367 |
| 3605.941 | 3715.903 | 3363.935 | 0.037895 | 0.249012381 | 0.847597088 |
| 31627.03 | 31527.58 | 31744.65 | -0.40371 | 0.218682865 | 0.001662103 |
| 1571.568 | 1713.96  | 1869.552 | -0.09032 | 0.784914078 | 0.658487105 |
| 26505.81 | 26610.51 | 27574.84 | -0.30867 | 0.641408722 | 0.042689756 |
| 1.786889 | 0.928976 | 0        | -0.14519 | NA          |             |
| 3916.86  | 4043.831 | 4580.611 | 0.475403 | 0.335666342 | 3.21175E-06 |
| 24.12299 | 39.94596 | 27.24683 | -0.46006 | 0.777781833 | NA          |
| 7.147554 | 20.43747 | 14.67137 | 0.073673 | 0.905394249 | NA          |
| 25.90988 | 32.51415 | 28.29478 | -0.27187 | 0.46017679  | NA          |
| 0        | 2.786927 | 4.19182  | 0.405711 | NA          |             |
| 561.9764 | 470.9907 | 439.0931 | 0.291927 | 0.9960277   | 0.359566588 |
| 474.4189 | 506.2918 | 390.8872 | 0.193613 | 0.918350023 | 0.431825344 |
| 866.6409 | 879.74   | 1007.085 | 0.096026 | 0.484084014 | 0.625626406 |
| 32109.49 | 31834.14 | 31472.18 | -0.2545  | 0.599211134 | 0.024919247 |
| 1501.88  | 1383.245 | 1619.09  | -0.09564 | 0.884585407 | 0.680348001 |
| 27.69677 | 12.07668 | 8.383639 | -0.25537 | 0.256151839 | NA          |
| 1026.567 | 973.5666 | 962.0226 | 0.167189 | 0.973922065 | 0.457073409 |
| 8048.146 | 7760.664 | 6924.886 | 0.018152 | 0.00756732  | 0.93327699  |
| 2.680333 | 4.644879 | 2.09591  | 0.437968 | NA          |             |
| 20.54922 | 23.22439 | 20.9591  | -0.01799 | 0.757209202 | NA          |
| 651.3209 | 568.5332 | 693.7461 | 0.36904  | 0.695456738 | 0.034869884 |
| 0        | 0        | 4.19182  | -0.68638 | NA          |             |
| 0        | 0.928976 | 1.047955 | 0.229302 | NA          |             |
| 747.8128 | 841.652  | 954.6869 | 0.000183 | 0.598960113 | 0.997469085 |
| 40708    | 39018.84 | 40444.77 | -0.36777 | 0.598960113 | 0.006992399 |
| 687.9521 | 614.982  | 761.8632 | -0.21563 | 0.07582841  | 0.27042216  |
| 1308.896 | 1354.447 | 1458.753 | 0.132403 | 0.770051929 | 0.566742383 |
| 1.786889 | 0        | 0        | 0.083489 | NA          |             |
| 0.893444 | 0.928976 | 1.047955 | #DIV/0!  | NA          |             |
| 190.3036 | 259.1842 | 256.7489 | -0.23514 | 0.767024472 | 0.533112779 |
| 2141.586 | 2261.127 | 2049.8   | -0.08702 | 0.005386667 | 0.531391342 |
| 362.7384 | 427.3289 | 405.5585 | 0.112859 | 0.580245461 | 0.659046549 |
| 697.78   | 747.8255 | 594.1904 | 0.024859 | 0.817609984 | 0.923910484 |
| 399.3696 | 493.2861 | 431.7574 | -0.33524 | 0.053184762 | 0.073272362 |
| 211.7463 | 180.2213 | 197.0155 | 0.042742 | 0.145286779 | 0.923725803 |
| 677.2307 | 614.053  | 624.5811 | 0.156104 | 0.477428994 | 0.470568982 |
| 883.6164 | 971.7086 | 824.7405 | -0.04286 | 0.171797519 | 0.892893032 |
| 437.7877 | 404.1045 | 428.6136 | -0.05247 | 0.794232621 | 0.871061917 |



|          |          |          |          |             |             |
|----------|----------|----------|----------|-------------|-------------|
| 482.4599 | 431.0448 | 408.7024 | 0.519506 | 0.570003668 | 0.051038786 |
| 0        | 7.431806 | 4.19182  | #DIV/0!  | NA          |             |
| 1.786889 | 0        | 5.239774 | -0.2353  | NA          |             |
| 5224.862 | 5474.454 | 5492.332 | 0.035728 | 0.413714744 | 0.8085461   |
| 1624.282 | 1837.514 | 1658.913 | -0.15775 | 0.158417136 | 0.329120807 |
| 959.5591 | 837.9361 | 850.9394 | -0.23748 | 0.947527175 | 0.174598931 |
| 7628.227 | 7363.062 | 6811.707 | 0.077649 | 0.812875146 | 0.764793691 |
| 162.6069 | 139.3464 | 209.591  | -0.26549 | 0.413905026 | 0.426257832 |
| 76.83621 | 68.74421 | 77.54866 | 0.660049 | 0.433973714 | 0.217405432 |
| 1466.142 | 1434.339 | 1436.746 | 0.027247 | 0.92288341  | 0.904467867 |
| 370.7794 | 406.8914 | 299.7151 | 0.216451 | 0.802471571 | 0.422116695 |
| 13.40166 | 33.44313 | 23.05501 | 0.708127 | 0.183923135 | NA          |
| 416.345  | 501.6469 | 476.8195 | 0.106096 | 0.740595411 | 0.715172443 |
| 483.3533 | 603.8342 | 599.4302 | 0.009648 | 0.04381621  | 0.984451848 |
| 928.2886 | 863.0185 | 724.1368 | 0.017065 | 0.649714874 | 0.94581612  |
| 1666.274 | 1643.358 | 1709.214 | 0.123186 | 0.350762724 | 0.365253762 |
| 0        | 7.431806 | 2.09591  | 1.854873 | NA          |             |
| 2482.882 | 2406.047 | 2086.478 | 0.149117 | 0.053089664 | 0.477876695 |
| 247.4841 | 299.1302 | 307.0508 | -0.34562 | 0.540189768 | 0.122362777 |
| 976.5346 | 1176.083 | 1153.798 | -0.19579 | 0.835449534 | 0.329120807 |
| 1.786889 | 0        | 0        | #DIV/0!  | NA          |             |
| 14.29511 | 22.29542 | 23.05501 | -0.47285 | 0.928104954 | NA          |
| 619.1569 | 616.8399 | 703.1777 | 0.478571 | 0.148074498 | 0.002531629 |
| 7790.834 | 7994.765 | 8274.652 | -0.16176 | 0.761936154 | 0.118990473 |
| 1.786889 | 0        | 0        | #DIV/0!  | NA          |             |
| 1251.715 | 1247.614 | 1295.272 | -0.16988 | 0.995598118 | 0.323922459 |
| 357.3777 | 428.2578 | 401.3667 | -0.09726 | 0.455739606 | 0.690294956 |
| 403.8368 | 495.1441 | 539.6968 | 0.129982 | 0.28287487  | 0.644875718 |
| 1232.953 | 1226.248 | 1284.793 | -0.02636 | 0.819879878 | 0.907473183 |
| 495.8616 | 570.3911 | 451.6686 | 0.229196 | 0.331098637 | 0.318452284 |
| 3085.063 | 2999.663 | 3018.11  | 0.005038 | 0.011540931 | 0.979410591 |
| 357.3777 | 353.9398 | 368.8801 | 0.04147  | 0.642006987 | 0.87909951  |
| 290.3694 | 319.5677 | 279.804  | 0.05452  | 0.901380807 | 0.865246562 |
| 410.9844 | 389.2408 | 503.0183 | -0.04409 | 0.246611129 | 0.875929853 |
| 5.360666 | 6.50283  | 5.239774 | 1.113981 | NA          |             |
| 1033.715 | 1029.305 | 928.488  | 0.168602 | 0.400955126 | 0.457073409 |
| 61.64765 | 55.73855 | 54.49365 | -0.05973 | 0.795811864 | 0.923910484 |
| 3013.587 | 2898.404 | 2749.834 | 0.059178 | 0.866564571 | 0.820867679 |
| 287.6891 | 314.9228 | 228.4542 | 0.154352 | 0.574512226 | 0.620471139 |
| 2255.053 | 2306.647 | 2474.222 | 0.00701  | 0.785492922 | 0.97417638  |
| 2314.021 | 2298.286 | 2385.145 | -0.16318 | 0.79239225  | 0.247256105 |
| 604.8618 | 695.8028 | 615.1495 | 0.081174 | 0.10822328  | 0.714693632 |
| 877.3623 | 1053.459 | 896.0014 | -0.02268 | 0.73037883  | 0.923725803 |
| 23340.34 | 23445.49 | 23397.69 | -0.38146 | 0.853046438 | 0.003889306 |
| 1568.888 | 1639.642 | 1673.584 | -0.119   | 0.371004931 | 0.450196624 |
| 2214.848 | 2235.116 | 2519.284 | -0.13297 | 0.895968293 | 0.400713698 |
| 580.7388 | 491.4282 | 579.5191 | -0.07631 | 0.824582133 | 0.798185205 |
| 17723.25 | 17538.13 | 16282.08 | -0.14277 | 0.580611002 | 0.422560599 |
| 2960.874 | 2924.416 | 2900.739 | -0.09988 | 0.968196977 | 0.583691606 |
| 439.5746 | 496.0731 | 443.2849 | 0.049654 | 0.684723286 | 0.84551374  |
| 222.4676 | 250.8235 | 225.3103 | 0.010874 | 0.685427571 | 0.975406172 |
| 2346.185 | 2563.044 | 2374.666 | -0.31379 | 0.990064993 | 0.029788115 |
| 955.9854 | 810.9958 | 925.3442 | 0.307665 | 0.73176709  | 0.088358317 |
| 386.8614 | 400.3886 | 407.6545 | 0.296177 | 0.124733431 | 0.115345014 |

|          |          |          |             |             |             |
|----------|----------|----------|-------------|-------------|-------------|
| 335.935  | 342.7921 | 276.6601 | 0.086243    | 0.577981995 | 0.80030609  |
| 559.2961 | 575.036  | 569.0395 | -0.18901    | 0.469683278 | 0.326192074 |
| 2230.93  | 2344.735 | 2168.219 | 0.124612    | 0.023980578 | 0.340424273 |
| 15525.38 | 15185.97 | 14506.84 | 0.086568    | 0.517968435 | 0.49413501  |
| 15.18855 | 14.86361 | 6.287729 | -0.39199    | 0.748298735 | NA          |
| 1631.429 | 1517.946 | 1588.7   | -0.06781    | 0.058460789 | 0.728787361 |
| 155.4593 | 163.4997 | 166.6248 | -0.4815     | 7.59971E-05 | 0.033645271 |
| 174.2216 | 157.9259 | 248.3653 | -0.55748    | 0.283463824 | 0.060691739 |
| 33823.12 | 32577.32 | 34546.88 | -0.07363    | 0.716459644 | 0.546900844 |
| 427.0664 | 477.4935 | 427.5656 | 0.021086    | 0.168996242 | 0.961800697 |
| 108.1068 | 154.21   | 136.2341 | -0.43748    | 0.209524948 | 0.313958096 |
| 734.4112 | 758.0442 | 701.0818 | 0.19377     | 0.600467264 | 0.291487478 |
| 1928.053 | 2105.059 | 2241.576 | -0.01442    | 0.009038328 | 0.953867552 |
| 368.9925 | 408.7493 | 387.7433 | 0.086246    | 0.484625827 | 0.792240634 |
| 68.79521 | 73.38909 | 83.83639 | -0.38273    | 0.523530764 | 0.313505068 |
| 1213.297 | 1166.794 | 1277.457 | -0.14783    | 0.469347309 | 0.333065318 |
| 3734.597 | 3977.874 | 4095.408 | -0.20775    | 0.152933305 | 0.103471246 |
| 958.6657 | 876.0241 | 883.426  | -0.28338    | 0.62498123  | 0.073806318 |
| 572.6978 | 584.3258 | 602.5741 | 0.077484    | 0.679066538 | 0.716565058 |
| 13234.59 | 12666.58 | 11814.64 | 0.116407    | 0.127584376 | 0.503879072 |
| 1086.428 | 1053.459 | 1139.127 | -0.18299    | 0.643621852 | 0.320138645 |
| 0        | 0        | 2.09591  | #DIV/0! NA  | NA          |             |
| 437.7877 | 326.0705 | 362.5924 | 0.174067    | 0.67324111  | 0.549888611 |
| 955.0919 | 935.4786 | 1023.852 | -0.05725    | 0.647886117 | 0.752110266 |
| 6.25411  | 1.857952 | 4.19182  | 0.053859 NA | NA          |             |
| 950.6247 | 684.6551 | 919.0564 | -0.28052    | 0.442989531 | 0.144365513 |
| 442.2549 | 479.3515 | 504.0663 | 0.065311    | 0.484921587 | 0.797601985 |
| 0.893444 | 0        | 2.09591  | #DIV/0! NA  | NA          |             |
| 282.3284 | 353.9398 | 313.3385 | 0.075017    | 0.384584076 | 0.798876088 |
| 726.3702 | 582.4678 | 757.6714 | -0.46753    | 0.897766774 | 0.025807779 |
| 1234.74  | 1221.603 | 1343.478 | -0.15548    | 0.216910334 | 0.266398936 |
| 410.9844 | 444.0504 | 414.9901 | 0.285       | 0.917013507 | 0.245528705 |
| 1426.83  | 1330.293 | 1196.764 | 0.140238    | 0.991590779 | 0.503205042 |
| 250.1644 | 222.9542 | 215.8787 | 0.111466    | 0.272065999 | 0.718168497 |
| 748.7063 | 679.0813 | 601.5261 | 0.232754    | 0.503914082 | 0.365235491 |
| 978.3215 | 915.9701 | 996.6051 | 0.176612    | 0.139873727 | 0.380365797 |
| 592.3535 | 596.4024 | 561.7038 | 0.192334    | 0.708011334 | 0.361564535 |
| 1129.314 | 1171.438 | 1062.626 | 0.019323    | 0.298839192 | 0.941596912 |
| 13.40166 | 22.29542 | 26.19887 | -0.06629    | 0.709065901 | NA          |
| 653.1078 | 616.8399 | 654.9718 | 0.127458    | 0.989306104 | 0.564967632 |
| 8372.466 | 8150.833 | 7465.631 | 0.12603     | 0.18789975  | 0.302912952 |
| 5.360666 | 1.857952 | 0        | 1.454465 NA | NA          |             |
| 220.6807 | 245.2496 | 291.3315 | 0.081704    | 0.994145678 | 0.843896683 |
| 427.9598 | 436.6186 | 380.4076 | -0.05649    | 0.154093864 | 0.844024501 |
| 1028.354 | 1026.518 | 1118.168 | -0.28507    | 0.418813799 | 0.034479858 |
| 7033.193 | 7477.326 | 7574.618 | 0.164618    | 0.045192099 | 0.229483247 |
| 1593.011 | 1602.483 | 1360.245 | 0.087679    | 0.116586762 | 0.683321289 |
| 5.360666 | 2.786927 | 1.047955 | 0.61433 NA  | NA          |             |
| 3739.064 | 3697.324 | 3835.515 | 0.199262    | 0.092299784 | 0.287877942 |
| 2.680333 | 0.928976 | 0        | #DIV/0! NA  | NA          |             |
| 13.40166 | 14.86361 | 11.5275  | -0.59023    | 0.831439424 | NA          |
| 25.01644 | 26.01132 | 23.05501 | -0.06316    | 0.90469595  | NA          |
| 541.4272 | 628.9166 | 588.9507 | -0.07882    | 0.344730624 | 0.752110266 |
| 829.1163 | 837.0072 | 970.4062 | -0.32789    | 0.892240442 | 0.022120531 |

|          |          |          |          |             |             |
|----------|----------|----------|----------|-------------|-------------|
| 1096.256 | 934.5496 | 992.4133 | 0.33222  | 0.673923772 | 0.225879379 |
| 1177.56  | 1183.515 | 1127.599 | -0.02251 | 0.362841481 | 0.912679298 |
| 243.9103 | 275.9058 | 289.2356 | -0.37867 | 0.869770641 | 0.088001869 |
| 458.3369 | 431.9737 | 481.0113 | -0.40741 | 0.746342492 | 0.009491168 |
| 37.52466 | 64.09933 | 52.39774 | -0.09774 | 0.881060269 | 0.901090975 |
| 394.9024 | 443.1214 | 440.1411 | 0.253365 | 0.716351188 | 0.292802751 |
| 643.2799 | 596.4024 | 535.505  | -0.00956 | 0.327866713 | 0.97680656  |
| 248.3775 | 219.2383 | 294.4753 | -0.18883 | 0.210589435 | 0.487331989 |
| 421.7057 | 470.0617 | 428.6136 | 0.141359 | 0.655062777 | 0.56820839  |
| 2163.922 | 2154.295 | 2216.425 | 0.092606 | 0.310114043 | 0.578074656 |
| 25.01644 | 27.86927 | 24.10296 | 0.427986 | 0.960773888 | NA          |
| 9770.706 | 9679.927 | 10659.8  | -0.3003  | 0.92790798  | 0.088369497 |
| 80.40998 | 58.52547 | 93.26799 | 0.18076  | 0.987280421 | 0.764338813 |
| 283.2218 | 239.6757 | 322.7701 | -0.16201 | 0.542904501 | 0.589672784 |
| 23.22955 | 39.01698 | 20.9591  | 0.221905 | 0.995299355 | NA          |
| 6054.872 | 6086.649 | 5708.21  | -0.03946 | 0.985859213 | 0.817066359 |
| 510.1567 | 579.6809 | 402.4147 | 0.107597 | 0.973340554 | 0.709912994 |
| 7808.703 | 7877.714 | 10015.3  | -0.08587 | 1.1083E-07  | 0.864107722 |
| 1257.076 | 1298.708 | 1491.24  | 0.076677 | 0.732140966 | 0.716565058 |
| 1995.954 | 2056.752 | 1899.942 | -0.16929 | 0.012847448 | 0.192883976 |
| 862.1737 | 834.2202 | 807.9732 | 0.071166 | 0.917013507 | 0.759033711 |
| 609.329  | 627.9876 | 621.4373 | -0.28406 | 0.122493092 | 0.068898592 |
| 16.082   | 2.786927 | 8.383639 | 0.738506 | 0.509078826 | NA          |
| 482.4599 | 506.2918 | 519.7856 | 0.304772 | 0.760762822 | 0.071096214 |
| 512.837  | 614.982  | 488.347  | 0.324011 | 0.369977802 | 0.10872211  |
| 1041.756 | 1050.672 | 1017.564 | -0.1629  | 0.545399422 | 0.27042216  |
| 0.893444 | 1.857952 | 5.239774 | 0.125807 | NA          | NA          |
| 3.573777 | 0        | 0        | 0.440193 | NA          | NA          |
| 1333.912 | 1320.075 | 1140.175 | 0.191895 | 0.668522148 | 0.372138887 |
| 1049.797 | 1073.896 | 1192.573 | -0.4767  | 0.236875869 | 0.000164663 |
| 87.55754 | 86.39475 | 76.50071 | -0.37424 | 0.962556121 | 0.365253762 |
| 37.52466 | 39.01698 | 42.96615 | -0.49973 | 0.604929869 | 0.324099572 |
| 30.3771  | 52.95162 | 69.16502 | -0.28533 | 0.935506037 | 0.690294956 |
| 2568.652 | 2671.734 | 2455.358 | -0.1285  | 0.960956671 | 0.501904702 |
| 8.934443 | 8.360782 | 15.71932 | 1.209282 | 0.439271214 | NA          |
| 668.2963 | 717.1693 | 762.9112 | 0.053316 | 0.962011634 | 0.834432692 |
| 358.2711 | 440.3345 | 423.3738 | 0.264784 | 0.728952588 | 0.22284642  |
| 482.4599 | 600.1183 | 609.9097 | -0.41313 | 0.154093864 | 0.034322372 |
| 46913.86 | 46495.24 | 47030.12 | -0.24012 | 0.826883467 | 0.063510063 |
| 6566.815 | 6895.787 | 7121.901 | -0.18921 | 0.956608426 | 0.241575828 |
| 247.4841 | 228.528  | 255.701  | 0.033874 | 0.973223327 | 0.93327699  |
| 813.0343 | 706.9506 | 935.8237 | -0.0908  | 0.434274199 | 0.770449453 |
| 1.786889 | 6.50283  | 2.09591  | -0.2779  | NA          | NA          |
| 499.4353 | 558.3144 | 538.6488 | -0.02247 | 0.715549426 | 0.923725803 |
| 1056.945 | 1256.904 | 1046.907 | 0.071357 | 0.76103064  | 0.708596546 |
| 201.9184 | 198.8008 | 215.8787 | -0.71319 | 0.183923135 | 0.000227187 |
| 369.8859 | 353.0108 | 398.2229 | 0.134389 | 0.993005178 | 0.673302041 |
| 937.223  | 959.632  | 998.701  | -0.06195 | 0.97836084  | 0.764338813 |
| 696.8865 | 713.4534 | 606.7659 | -3.5E-05 | 0.846759683 | 0.996720771 |
| 1794.93  | 2056.752 | 1930.333 | 0.042895 | 0.8968711   | 0.818409186 |
| 683.4849 | 647.4961 | 608.8618 | 0.100002 | 0.956452433 | 0.678425078 |
| 5555.436 | 5196.69  | 4973.594 | 0.334521 | 0.149001182 | 0.033609232 |
| 849.6655 | 794.2743 | 716.8011 | 0.109661 | 0.62292707  | 0.708596546 |
| 581.6322 | 463.5589 | 515.5938 | -0.30707 | 0.209856535 | 0.167165088 |

|          |          |          |          |             |             |
|----------|----------|----------|----------|-------------|-------------|
| 1623.388 | 1531.881 | 1532.11  | -0.04063 | 0.034700814 | 0.835596295 |
| 11.61478 | 5.573855 | 22.00705 | 0.533528 | 0.648891486 | NA          |
| 701.3537 | 707.8795 | 599.4302 | 0.111944 | 0.967813477 | 0.607944538 |
| 849.6655 | 859.3026 | 857.2271 | 0.262741 | 0.72031406  | 0.131463633 |
| 2573.119 | 2470.147 | 2332.748 | -0.06656 | 0.000185215 | 0.752312486 |
| 1428.617 | 1643.358 | 1692.447 | -0.21152 | 0.888097311 | 0.253027668 |
| 13.40166 | 19.50849 | 12.57546 | 0.222072 | 0.710373411 | NA          |
| 107.2133 | 64.09933 | 70.21298 | 0.339833 | 0.386644751 | 0.620471139 |
| 1382.158 | 1516.088 | 1585.556 | -0.00675 | 0.761936154 | 0.978405477 |
| 3602.367 | 3735.412 | 3589.246 | -0.15011 | 0.051957782 | 0.353563667 |
| 0        | 0        | 0        | #NUM!    | NA          | NA          |
| 598.6077 | 557.3855 | 558.56   | -0.01994 | 0.187619163 | 0.946818235 |
| 2254.16  | 2320.581 | 2001.594 | 0.105321 | 8.89999E-05 | 0.602270106 |
| 443.1484 | 376.2352 | 375.1679 | 0.477909 | 0.167094261 | 0.022550727 |
| 0        | 0        | 0        | #NUM!    | NA          | NA          |
| 368.9925 | 254.5394 | 289.2356 | -0.21035 | 0.785971011 | 0.539844242 |
| 493.1812 | 538.8059 | 519.7856 | -0.32202 | 0.465950462 | 0.091608354 |
| 789.8047 | 724.6011 | 656.0198 | 0.060904 | 0.997568936 | 0.866936111 |
| 0        | 0.928976 | 0        | -0.50354 | NA          | NA          |
| 15827.37 | 15486.95 | 15962.45 | -0.27451 | 0.651961753 | 0.044918766 |
| 1.786889 | 5.573855 | 6.287729 | -0.89292 | 0.833722816 | NA          |
| 279.6481 | 271.2609 | 247.3174 | 0.072643 | 0.956452433 | 0.882926075 |
| 247.4841 | 247.1076 | 224.2623 | -0.15387 | 0.727251544 | 0.676897688 |
| 1507.24  | 1582.975 | 1491.24  | 0.088559 | 0.621884159 | 0.570700534 |
| 508.3698 | 399.4596 | 412.8942 | 0.158946 | 0.553033696 | 0.572103667 |
| 22.33611 | 21.36644 | 30.39069 | 0.266549 | 0.828690815 | NA          |
| 1535.831 | 1503.083 | 1471.329 | 0.384357 | 0.470002734 | 0.053095679 |
| 509.2632 | 583.3968 | 471.5797 | 0.208668 | 0.848681983 | 0.487331989 |
| 28.59022 | 26.01132 | 31.43865 | -1.29905 | 0.014948404 | 0.023695036 |
| 1541.191 | 1523.52  | 1390.636 | 0.041392 | 0.107676441 | 0.8721296   |
| 547.6813 | 536.948  | 444.3329 | -0.03938 | 0.938838346 | 0.893756708 |
| 1646.618 | 1430.623 | 1470.281 | 0.228655 | 0.71685777  | 0.130431848 |
| 4364.475 | 4377.334 | 4569.083 | -0.15505 | 0.935100162 | 0.300201673 |
| 746.9194 | 726.459  | 769.1989 | -0.16703 | 0.477428994 | 0.386225298 |
| 857.7065 | 859.3026 | 681.1707 | 0.173754 | 0.464552004 | 0.505302546 |
| 1034.608 | 1129.635 | 1080.441 | 0.148522 | 0.120606425 | 0.333065318 |
| 7.147554 | 11.14771 | 22.00705 | -0.24268 | 0.720648336 | NA          |
| 356.4843 | 367.8744 | 304.9549 | 0.063357 | 0.511726855 | 0.855100406 |
| 506.5829 | 532.3031 | 394.031  | 0.241376 | 0.586160756 | 0.408058591 |
| 1280.306 | 1211.384 | 1150.654 | 0.235537 | 0.430461737 | 0.24175269  |
| 88.45098 | 75.24704 | 96.41185 | 0.085989 | 0.962660515 | 0.893701659 |
| 4687.009 | 4642.092 | 4269.368 | 0.320717 | 0.028304309 | 0.036381838 |
| 3437.08  | 3483.659 | 3776.829 | -0.23172 | 0.455280748 | 0.057894023 |
| 671.8701 | 725.5301 | 630.8688 | 0.196061 | 0.900383237 | 0.302414442 |
| 2804.522 | 2781.353 | 2721.539 | -0.04214 | 0.1433784   | 0.818645356 |
| 0        | 0        | 0        | #NUM!    | NA          | NA          |
| 2.680333 | 0.928976 | 6.287729 | 0.634289 | NA          | NA          |
| 659.3619 | 650.283  | 536.5529 | 0.242052 | 0.179668524 | 0.380365797 |
| 416.345  | 458.914  | 468.4358 | -0.23233 | 0.35165001  | 0.359873864 |
| 1.786889 | 0        | 1.047955 | #DIV/0!  | NA          | NA          |
| 581.6322 | 519.2975 | 627.725  | -0.07201 | 0.73478662  | 0.794250417 |
| 6263.044 | 6431.299 | 7516.98  | -0.52776 | 0.759261525 | 2.16222E-05 |
| 18951.74 | 19647.84 | 19956.21 | -0.29427 | 0.739965249 | 0.026742345 |
| 89.34443 | 148.6361 | 133.0903 | -0.15476 | 0.390042791 | 0.775439768 |

|          |          |          |             |                |             |
|----------|----------|----------|-------------|----------------|-------------|
| 4096.442 | 3772.571 | 3611.253 | 0.048496    | 0.827268091    | 0.794250417 |
| 1315.15  | 1058.103 | 1209.34  | 0.064237    | 0.61217167     | 0.806564543 |
| 990.8297 | 919.686  | 809.0212 | 0.222112    | 0.784425728    | 0.283438968 |
| 2182.684 | 2095.769 | 2179.746 | -0.04828    | 0.965163416    | 0.797601985 |
| 955.9854 | 893.6747 | 901.2412 | 0.083214    | 0.444125545    | 0.716565058 |
| 425.2795 | 457.0561 | 495.6827 | 0.027257    | 0.501942014    | 0.935768815 |
| 1467.929 | 1396.251 | 1357.102 | 0.116272    | 0.081926061    | 0.520805117 |
| 5757.355 | 5547.843 | 5647.429 | -0.02876    | 0.735300868    | 0.87134989  |
| 3327.186 | 3049.827 | 3206.742 | 0.137578    | 0.239965637    | 0.398613087 |
| 18531.82 | 18190.27 | 19744.52 | -0.2771     | 0.709468629    | 0.016996857 |
| 1.786889 | 1.857952 | 0        | -1.58112 NA | NA             |             |
| 6301.462 | 6212.99  | 5737.553 | 0.036155    | 0.001564335    | 0.891918558 |
| 459.2303 | 587.1127 | 485.2031 | 0.235108    | 0.945870306    | 0.245528705 |
| 1793.143 | 1799.426 | 1542.59  | 0.237336    | 0.325979266    | 0.225879379 |
| 638.8126 | 681.8682 | 806.9253 | 0.405766    | 0.755224646    | 0.02451735  |
| 709.3947 | 627.0586 | 484.1552 | 0.113244    | 0.649714874    | 0.698234721 |
| 1078.387 | 1051.601 | 974.5981 | -0.00603    | 0.736581016    | 0.982607912 |
| 80.40998 | 104.0453 | 129.9464 | -0.06623    | 0.010353677    | 0.915422831 |
| 583.4191 | 631.7035 | 613.0536 | -0.08369    | 0.099551501    | 0.729827413 |
| 387.7548 | 457.9851 | 326.9619 | 0.284198    | 0.86365129     | 0.27042216  |
| 76.83621 | 100.3294 | 74.4048  | 0.05428     | 0.718668252    | 0.923602174 |
| 1250.822 | 1130.564 | 1093.017 | 0.154171    | 0.406333601    | 0.472093197 |
| 1883.38  | 1866.312 | 1690.351 | 0.072467    | 0.1975101      | 0.778199039 |
| 455.6566 | 431.0448 | 427.5656 | 0.354819    | 0.799313452    | 0.052658569 |
| 5779.691 | 6108.016 | 5553.113 | -0.00473    | 0.475984345    | 0.982131958 |
| 1090.895 | 1098.049 | 813.213  | 0.126422    | 0.700014781    | 0.669238482 |
| 1375.011 | 1406.469 | 1474.473 | -0.04217    | 0.614621507    | 0.80030609  |
| 0.893444 | 0        | 0        | -2.74916 NA | NA             |             |
| 7171.677 | 7178.196 | 6050.892 | -0.07582    | 0.028285791    | 0.777508737 |
| 209.066  | 222.9542 | 258.8449 | 0.179977    | 0.848301697    | 0.603217016 |
| 417.2385 | 481.2094 | 425.4697 | -0.10183    | 0.173085065    | 0.708596546 |
| 255.5251 | 277.7638 | 237.8858 | -0.05982    | 0.812875146    | 0.890721169 |
| 226.9348 | 203.4457 | 199.1114 | 0.265704    | 0.755224646    | 0.441429894 |
| 724.5833 | 742.2516 | 575.3272 | 0.035726    | 0.310073788    | 0.912679298 |
| 788.0178 | 873.2372 | 833.1241 | 0.008143    | 0.785492922    | 0.988370025 |
| 811.2474 | 829.5754 | 723.0889 | 0.290806    | 0.353648271    | 0.24818395  |
| 595.0339 | 599.1894 | 582.6629 | 0.155223    | 0.165510999    | 0.531462254 |
| 1026.567 | 969.8507 | 912.7687 | 0.137997    | 0.899176451    | 0.461673135 |
| 19.65577 | 27.86927 | 24.10296 | 0.632393    | 0.578995017 NA |             |
| 1368.757 | 1405.54  | 1462.945 | 0.080751    | 0.745767703    | 0.620471139 |
| 24338.32 | 23880.25 | 24748.5  | -0.36674    | 0.824080056    | 0.010962375 |
| 0        | 0.928976 | 1.047955 | -0.41399 NA | NA             |             |
| 10.72133 | 13.00566 | 1.047955 | 0.795062    | 0.936832996 NA |             |
| 854.1327 | 1053.459 | 881.3301 | -0.18945    | 0.813397158    | 0.33275563  |
| 1207.043 | 1192.805 | 1026.996 | 0.15139     | 0.467158435    | 0.556864585 |
| 3.573777 | 7.431806 | 8.383639 | 0.425292    | 0.730407446 NA |             |
| 23525.28 | 23321.94 | 24193.09 | -0.242      | 0.93399229     | 0.119229885 |
| 4205.442 | 4104.215 | 3853.33  | 0.030773    | 0.140612719    | 0.917805295 |
| 350.2301 | 375.3062 | 368.8801 | 0.187895    | 0.875368742    | 0.526905314 |
| 2.680333 | 0        | 1.047955 | -0.33102 NA | NA             |             |
| 12.50822 | 29.72722 | 10.47955 | -0.79758    | 0.993312366 NA |             |
| 0        | 1.857952 | 0        | #DIV/0! NA  | NA             |             |
| 574.4847 | 549.9537 | 455.8604 | 0.106854    | 0.726598225    | 0.696921855 |
| 4744.189 | 4974.665 | 5214.624 | -0.23713    | 0.951394798    | 0.110990341 |

|          |          |          |          |             |             |
|----------|----------|----------|----------|-------------|-------------|
| 378.8204 | 434.7607 | 326.9619 | 0.097029 | 0.811082292 | 0.726171034 |
| 402.9434 | 380.8801 | 485.2031 | 0.072618 | 0.029440414 | 0.832900164 |
| 500.3288 | 508.1497 | 608.8618 | -0.06228 | 0.310443697 | 0.819964665 |
| 1363.396 | 1237.396 | 1412.643 | -0.22908 | 0.274927458 | 0.130685332 |
| 424.386  | 370.6613 | 407.6545 | 0.009222 | 0.821250302 | 0.990142758 |
| 1103.404 | 1095.262 | 1219.819 | -0.07051 | 0.408721528 | 0.757350793 |
| 1048.904 | 1064.606 | 896.0014 | 0.037553 | 0.234941511 | 0.904467867 |
| 226.0414 | 238.7468 | 189.6798 | 0.092618 | 0.665579954 | 0.811724117 |
| 3597.007 | 3806.943 | 3874.289 | 0.191655 | 0.697514819 | 0.07575529  |
| 3083.276 | 3104.637 | 3183.687 | -0.06287 | 0.668641279 | 0.75448001  |
| 858.5999 | 770.1209 | 831.0282 | 0.236001 | 0.301324739 | 0.294466305 |
| 787.1244 | 824.9305 | 940.0155 | -0.25489 | 0.36939921  | 0.132850703 |
| 4661.099 | 4276.075 | 4036.722 | -0.06018 | 0.000208059 | 0.782083823 |
| 1683.249 | 1833.798 | 1913.566 | -0.19379 | 0.894528942 | 0.296722063 |
| 225.148  | 234.1019 | 206.4471 | 0.03623  | 0.216003389 | 0.922546597 |
| 6056.659 | 6000.254 | 6346.415 | 0.077407 | 0.635969974 | 0.563375937 |
| 2315.808 | 2266.701 | 2020.457 | 0.17839  | 0.652183366 | 0.372138887 |
| 556.6158 | 522.0844 | 460.0522 | 0.031874 | 0.573830327 | 0.923725803 |
| 268.0333 | 264.7581 | 254.653  | 0.010045 | 0.29215357  | 0.975227629 |
| 858.5999 | 800.7771 | 876.0903 | 0.073434 | 0.98843748  | 0.711465473 |
| 754.067  | 740.3937 | 580.567  | 0.036954 | 0.67997963  | 0.901090975 |
| 12.50822 | 15.79259 | 14.67137 | -0.25914 | 0.812875146 | NA          |
| 303.771  | 315.8518 | 297.6192 | -0.07089 | 0.995722579 | 0.808330041 |
| 563.7633 | 620.5558 | 648.6841 | -0.04847 | 0.792868376 | 0.832431036 |
| 0        | 0        | 0        | #NUM!    | NA          | NA          |
| 3.573777 | 4.644879 | 7.335684 | 0.086646 | NA          | NA          |
| 0.893444 | 0.928976 | 1.047955 | -0.23272 | NA          | NA          |
| 0        | 3.715903 | 1.047955 | #DIV/0!  | NA          | NA          |
| 140.2707 | 153.281  | 176.0564 | 0.223599 | 0.478308661 | 0.55088846  |
| 1399.134 | 1269.91  | 1429.41  | -0.07415 | 0.088547132 | 0.896567419 |
| 14.29511 | 30.6562  | 20.9591  | 0.0208   | 0.655624618 | NA          |
| 837.1573 | 908.5383 | 718.8971 | 0.03514  | 0.962903592 | 0.896421455 |
| 2375.668 | 2571.405 | 2946.849 | -0.29856 | 0.090626117 | 0.025807779 |
| 913.1    | 954.9871 | 883.426  | 0.412592 | 0.613734914 | 0.023955106 |
| 941.6902 | 927.1178 | 950.4951 | 0.146353 | 0.985102475 | 0.386078627 |
| 3.573777 | 4.644879 | 0        | 0.452297 | NA          | NA          |
| 306.4514 | 330.7154 | 291.3315 | -0.10544 | 0.65458858  | 0.691804481 |
| 1304.429 | 1194.663 | 1275.361 | 0.081869 | 0.962011634 | 0.626829627 |
| 226.9348 | 230.386  | 223.2144 | 0.221545 | 0.614311366 | 0.535992604 |
| 53.60666 | 51.09367 | 42.96615 | -0.30988 | 0.76103064  | 0.56624122  |
| 10.72133 | 7.431806 | 10.47955 | -0.56316 | 0.727251544 | NA          |
| 2558.824 | 2810.152 | 2757.169 | -0.01921 | 0.344738271 | 0.923725803 |
| 22.33611 | 12.07668 | 16.76728 | -0.7459  | 0.141487454 | NA          |
| 707.6079 | 733.8909 | 698.9859 | 0.232277 | 0.662554511 | 0.177201026 |
| 1.786889 | 0        | 2.09591  | 0.55984  | NA          | NA          |
| 1.786889 | 0        | 0        | -0.55981 | NA          | NA          |
| 1853.897 | 1734.398 | 1822.394 | 0.233258 | 0.916233061 | 0.053045424 |
| 512.837  | 576.8939 | 610.9577 | 0.061471 | 0.622518586 | 0.822050288 |
| 2494.496 | 2283.422 | 2198.609 | 0.350065 | 0.263755993 | 0.12612237  |
| 2629.406 | 2778.567 | 2695.34  | -0.20332 | 0.37602059  | 0.192142371 |
| 6.25411  | 12.07668 | 6.287729 | 0.213458 | 0.614621507 | NA          |
| 694.2062 | 615.9109 | 727.2807 | 0.156597 | 0.702415456 | 0.400713698 |
| 1908.397 | 1674.943 | 1577.172 | 0.105347 | 0.769710962 | 0.647261886 |
| 2588.308 | 2984.799 | 2768.697 | -0.0995  | 0.80496489  | 0.52313639  |

|          |          |          |          |             |             |  |
|----------|----------|----------|----------|-------------|-------------|--|
| 0        | 0        | 0        | #NUM!    | NA          | NA          |  |
| 746.9194 | 839.7941 | 797.4937 | 0.123751 | 0.914164397 | 0.486948273 |  |
| 565.5502 | 605.6922 | 545.9845 | 0.157288 | 0.607353168 | 0.451963117 |  |
| 1.786889 | 2.786927 | 1.047955 | -0.68054 | NA          |             |  |
| 191.1971 | 179.2923 | 193.8717 | 0.256206 | 0.006307785 | 0.365253762 |  |
| 300.1973 | 263.8291 | 337.4415 | -0.41516 | 0.792868376 | 0.068859716 |  |
| 638.8126 | 697.6608 | 706.3216 | -0.20766 | 0.228848778 | 0.322281806 |  |
| 0.893444 | 1.857952 | 2.09591  | -1.06174 | NA          |             |  |
| 3218.186 | 3091.631 | 3019.158 | 0.235304 | 0.276178144 | 0.098090079 |  |
| 11.61478 | 0        | 0        | 0.366322 | NA          |             |  |
| 78.62309 | 72.46011 | 123.6587 | -0.16945 | 0.056337167 | 0.763319325 |  |
| 2488.242 | 2485.01  | 2287.686 | 0.143128 | 0.901380807 | 0.381582724 |  |
| 8268.827 | 8124.822 | 8462.236 | 0.023511 | 0.270977162 | 0.874744904 |  |
| 872.0016 | 758.0442 | 695.842  | 0.19783  | 0.030146682 | 0.400713698 |  |
| 281.4349 | 260.1132 | 243.1255 | 0.239174 | 0.885575053 | 0.333065318 |  |
| 167.9675 | 126.3407 | 113.1791 | 0.128752 | 0.779325825 | 0.775439768 |  |
| 566.4437 | 600.1183 | 571.1354 | 0.027629 | 0.111234411 | 0.923725803 |  |
| 50408.13 | 50694.21 | 50810.09 | -0.3423  | 0.652135039 | 0.001201529 |  |
| 805.8867 | 923.4019 | 867.7067 | -0.07879 | 0.641408722 | 0.751151284 |  |
| 89.34443 | 94.75553 | 124.7066 | -0.06506 | 0.999034414 | 0.911521311 |  |
| 351.1236 | 296.3433 | 378.3117 | 0.115246 | 0.187777748 | 0.706876462 |  |
| 3473.711 | 3542.185 | 3488.642 | -0.05236 | 0.867574132 | 0.741368284 |  |
| 4844.255 | 5031.333 | 5034.375 | 0.150054 | 0.32170196  | 0.225879379 |  |
| 836.2638 | 719.9562 | 920.1044 | 0.008088 | 0.817609984 | 0.980529916 |  |
| 31.27055 | 18.57952 | 26.19887 | 0.304136 | 0.991136341 | NA          |  |
| 2833.112 | 2759.058 | 3245.516 | -0.13724 | 0.798439173 | 0.481380095 |  |
| 2577.587 | 2595.558 | 2635.607 | 0.008872 | 0.951001819 | 0.956290296 |  |
| 482.4599 | 498.86   | 414.9901 | 0.144258 | 0.853477462 | 0.583053599 |  |
| 4590.517 | 4547.336 | 4300.807 | 0.026949 | 0.000548797 | 0.855100406 |  |
| 250.1644 | 261.9712 | 276.6601 | -0.03387 | 0.184109237 | 0.911916486 |  |
| 1.786889 | 1.857952 | 1.047955 | -1.44226 | NA          |             |  |
| 3671.162 | 3416.773 | 4012.619 | -0.04161 | 0.621884159 | 0.855100406 |  |
| 389.5417 | 371.5903 | 303.9069 | 0.080802 | 0.618790469 | 0.778766112 |  |
| 1002.444 | 1061.819 | 1023.852 | 0.08277  | 0.960773888 | 0.625457131 |  |
| 604.8618 | 560.1724 | 625.6291 | 0.051182 | 0.770381061 | 0.844024501 |  |
| 0        | 0        | 0        | #NUM!    | NA          | NA          |  |
| 2156.774 | 2116.207 | 2090.67  | 0.145978 | 0.86365129  | 0.240259541 |  |
| 5.360666 | 0        | 0        | 0.192875 | NA          |             |  |
| 479.7796 | 530.4452 | 418.134  | -0.08653 | 0.944990108 | 0.755018053 |  |
| 51.81977 | 46.44879 | 55.54161 | 0.220725 | 0.017930836 | 0.719971458 |  |
| 427.9598 | 462.6299 | 496.7306 | -0.05305 | 0.324651337 | 0.840718213 |  |
| 3507.662 | 3563.551 | 3532.656 | 0.06181  | 0.553033696 | 0.675143077 |  |
| 0        | 0.928976 | 5.239774 | 0.395441 | NA          |             |  |
| 0        | 0        | 4.19182  | #DIV/0!  | NA          |             |  |
| 7072.505 | 6877.208 | 7157.532 | 0.180424 | 0.585762809 | 0.292538732 |  |
| 1362.502 | 1405.54  | 1227.155 | 0.095635 | 0.2795135   | 0.708596546 |  |
| 259.0988 | 287.0535 | 302.859  | -0.05217 | 0.288584519 | 0.908612163 |  |
| 1727.921 | 1582.975 | 1346.622 | 0.261042 | 0.263755993 | 0.349930843 |  |
| 15.18855 | 24.15337 | 15.71932 | -0.29601 | 0.564427849 | NA          |  |
| 1.786889 | 0        | 0        | -1.50147 | NA          |             |  |
| 237.6562 | 194.1559 | 202.2553 | 0.039212 | 0.897759686 | 0.913620457 |  |
| 369.8859 | 355.7977 | 326.9619 | 0.048263 | 0.463180957 | 0.896421455 |  |
| 778.1899 | 730.1749 | 835.2201 | -0.16859 | 0.159614653 | 0.431825344 |  |
| 0        | 0        | 1.047955 | -0.68638 | NA          |             |  |

|          |          |          |          |             |             |
|----------|----------|----------|----------|-------------|-------------|
| 255.5251 | 247.1076 | 264.0846 | -0.03453 | 0.107676441 | 0.914120833 |
| 2058.496 | 1833.798 | 1931.381 | -0.03321 | 0.136068446 | 0.863216533 |
| 5907.453 | 6029.982 | 6864.105 | -0.31883 | 0.913769516 | 0.039022257 |
| 1986.127 | 2176.59  | 2066.567 | -0.12426 | 0.962433805 | 0.422116695 |
| 913.9935 | 954.0581 | 800.6375 | 0.114383 | 0.651943512 | 0.659338327 |
| 414.5581 | 414.3232 | 460.0522 | 0.166254 | 0.800508699 | 0.466447289 |
| 1.786889 | 0        | 2.09591  | #DIV/0!  | NA          |             |
| 570.9109 | 562.0303 | 556.464  | 0.042585 | 0.147626297 | 0.840777068 |
| 248.3775 | 287.9825 | 280.8519 | 0.081467 | 0.837529432 | 0.795655341 |
| 807.6736 | 893.6747 | 763.9591 | 0.186055 | 0.2795135   | 0.333065318 |
| 16.082   | 26.01132 | 22.00705 | 0.311948 | 0.212716004 | NA          |
| 2336.357 | 2397.686 | 2146.212 | 0.118699 | 0.232941496 | 0.589270302 |
| 28362.39 | 28609.67 | 27392.49 | -0.29496 | 0.730204074 | 0.030614917 |
| 106.3199 | 107.7612 | 98.50776 | 0.131175 | 0.004400836 | 0.764338813 |
| 9768.026 | 9518.286 | 8299.803 | -0.03098 | 0.208221128 | 0.923725803 |
| 1995.061 | 2226.755 | 1751.133 | -0.00148 | 0.139314666 | 0.996720771 |
| 1162.371 | 1281.058 | 1242.875 | 0.233914 | 0.84819607  | 0.317595626 |
| 640.5995 | 747.8255 | 706.3216 | -0.29118 | 0.185572017 | 0.104841824 |
| 103.6395 | 122.6248 | 111.0832 | 0.510639 | 0.333641544 | 0.328024792 |
| 1167.732 | 1183.515 | 1263.834 | 0.03624  | 0.390042791 | 0.872630949 |
| 96.49198 | 92.89758 | 83.83639 | -1.02199 | 0.000205284 | 0.006124694 |
| 6240.708 | 6185.121 | 6128.44  | 0.031486 | 0.732718278 | 0.835181175 |
| 1129.314 | 968.9217 | 1022.804 | 0.177991 | 0.832298202 | 0.39921965  |
| 773.7227 | 950.3422 | 837.316  | 0.175422 | 0.189947746 | 0.467083166 |
| 4192.04  | 4201.757 | 3621.732 | -0.0549  | 0.901380807 | 0.831655346 |
| 634.3454 | 622.4138 | 714.7052 | -0.35086 | 0.095897541 | 0.047027405 |
| 1.786889 | 0        | 0        | 0.083489 | NA          |             |
| 6.25411  | 4.644879 | 8.383639 | 0.011559 | 0.903271991 | NA          |
| 3241.416 | 3181.742 | 3149.104 | 0.123553 | 0.985859213 | 0.333065318 |
| 3363.818 | 3271.853 | 3078.891 | 0.067942 | 0.005621011 | 0.748344041 |
| 658.4684 | 701.3767 | 698.9859 | 0.243999 | 0.892614393 | 0.287132004 |
| 2058.496 | 2029.812 | 2133.636 | -0.14496 | 0.331331472 | 0.225630132 |
| 58.07388 | 54.80957 | 88.02821 | 0.140556 | 0.752287766 | 0.875604624 |
| 232.2955 | 277.7638 | 318.5783 | 0.222149 | 0.214140629 | 0.477547118 |
| 195.6643 | 175.5764 | 188.6319 | -0.01932 | 0.478079371 | 0.965791283 |
| 30.3771  | 37.15903 | 56.58956 | 0.206218 | 0.078454607 | 0.814120559 |
| 427.9598 | 536.019  | 498.8265 | 0.092661 | 0.29215357  | 0.724404377 |
| 1060.518 | 1143.569 | 1309.944 | -0.05281 | 0.896802518 | 0.831655346 |
| 752.2801 | 814.7117 | 871.8985 | -0.07845 | 0.698024229 | 0.765988241 |
| 730.8374 | 844.439  | 718.8971 | 0.038141 | 0.470002734 | 0.882565871 |
| 25.01644 | 22.29542 | 49.25388 | -0.37645 | 0.114505424 | NA          |
| 963.1329 | 1072.967 | 1163.23  | -0.11591 | 0.494209809 | 0.625382385 |
| 1764.552 | 1885.821 | 1753.229 | -0.0493  | 0.378784486 | 0.835293664 |
| 2.680333 | 2.786927 | 3.143865 | 0.519596 | NA          |             |
| 830.0097 | 653.9989 | 756.6234 | 0.115857 | 0.367802825 | 0.644740483 |
| 561.083  | 593.6155 | 580.567  | -0.08718 | 0.899761215 | 0.682436785 |
| 1464.355 | 1399.966 | 1173.709 | 0.048874 | 0.161272124 | 0.875604624 |
| 419.0254 | 427.3289 | 471.5797 | -0.14877 | 0.242503197 | 0.477876695 |
| 1061.412 | 1090.618 | 1173.709 | -0.39028 | 0.57058689  | 0.036067988 |
| 0        | 1.857952 | 1.047955 | -1.25894 | NA          |             |
| 73678.77 | 72584.59 | 72839.15 | -0.47742 | 0.83213076  | 0.00164999  |
| 637.0258 | 614.982  | 629.8209 | 0.055762 | 0.80050738  | 0.821432697 |
| 1205.256 | 1176.083 | 1309.944 | -0.03965 | 0.520356385 | 0.869696905 |
| 855.9196 | 744.1096 | 705.2736 | -0.03998 | 0.755573717 | 0.891918558 |



|          |          |          |             |                |             |
|----------|----------|----------|-------------|----------------|-------------|
| 1135.568 | 1119.416 | 1129.695 | -0.07978    | 0.816234041    | 0.693887308 |
| 488.714  | 444.9794 | 551.2243 | -0.19849    | 0.974771919    | 0.422793542 |
| 32273.89 | 32041.3  | 33430.81 | -0.20002    | 0.960823113    | 0.060851524 |
| 777.2965 | 741.3227 | 682.2186 | 0.289907    | 0.248671635    | 0.184454481 |
| 904.1656 | 1038.595 | 892.8576 | -0.00865    | 0.92288341     | 0.979395135 |
| 317.1727 | 295.4143 | 293.4274 | 0.004525    | 0.879847555    | 0.983593071 |
| 2642.808 | 2724.686 | 2742.498 | 0.01617     | 0.220796999    | 0.922101817 |
| 529.8124 | 596.4024 | 616.1975 | 0.069591    | 0.901380807    | 0.795076358 |
| 2962.661 | 3017.313 | 2936.37  | -0.16302    | 0.135397929    | 0.181725119 |
| 195.6643 | 220.1673 | 195.9676 | -0.00011    | 0.187777748    | 0.996992829 |
| 921.141  | 925.2599 | 1058.434 | -0.18944    | 0.923364203    | 0.411765294 |
| 0.893444 | 0.928976 | 0        | -1.36368 NA | NA             |             |
| 1569.782 | 1849.591 | 2081.238 | -0.29211    | 0.023293079    | 0.071238709 |
| 18109.22 | 17444.31 | 16846.92 | -0.22411    | 0.764235559    | 0.177201026 |
| 76.83621 | 65.95728 | 71.26093 | -0.30306    | 0.907589146    | 0.55088846  |
| 16149.9  | 16152.1  | 20022.23 | 0.393912    | 0.880647749    | 0.040358902 |
| 705.821  | 723.6721 | 717.8491 | 0.085871    | 0.769573539    | 0.708596546 |
| 6054.872 | 6357.91  | 6119.009 | -0.06862    | 0.587123529    | 0.691450677 |
| 694.2062 | 827.7174 | 798.5416 | 0.09032     | 0.948234757    | 0.734906514 |
| 444.0418 | 438.4766 | 432.8054 | -0.13441    | 0.71270119     | 0.49670864  |
| 2327.422 | 2261.127 | 2061.327 | 0.142029    | 0.214235831    | 0.449939346 |
| 2482.882 | 2419.053 | 2388.289 | -0.29324    | 0.568895197    | 0.034322372 |
| 1289.24  | 1267.123 | 1214.58  | 0.119874    | 0.655321049    | 0.521104798 |
| 0.893444 | 1.857952 | 2.09591  | #DIV/0! NA  | NA             |             |
| 451.1894 | 484.9253 | 664.4034 | -0.25896    | 0.681419018    | 0.278856737 |
| 649.534  | 754.3283 | 909.6248 | -0.47508    | 0.775017701    | 0.035238922 |
| 485.1402 | 454.2691 | 386.6954 | 0.304284    | 0.38441957     | 0.127757998 |
| 4.467221 | 15.79259 | 20.9591  | 0.064604    | 0.944990108 NA |             |
| 437.7877 | 531.3741 | 587.9027 | -0.27403    | 0.549290634    | 0.321405678 |
| 10.72133 | 16.72156 | 15.71932 | -1.07511    | 0.503345543 NA |             |
| 1215.084 | 1222.532 | 987.1735 | 0.391673    | 0.268223584    | 0.086195548 |
| 1756.511 | 1689.807 | 1586.604 | 0.73237     | 0.311074517    | 4.02321E-09 |
| 312.7055 | 353.9398 | 252.5571 | -0.34057    | 0.504924333    | 0.162970478 |
| 1513.495 | 1439.912 | 1662.056 | -0.14144    | 0.608976999    | 0.447154499 |
| 1371.437 | 1360.021 | 1224.011 | -0.00266    | 0.953363514    | 0.990142758 |
| 3.573777 | 1.857952 | 2.09591  | -0.9604 NA  | NA             |             |
| 0        | 0        | 2.09591  | #DIV/0! NA  | NA             |             |
| 4665.566 | 4694.115 | 5076.294 | -0.00529    | 0.466743878    | 0.977528539 |
| 7.147554 | 11.14771 | 9.431594 | -0.07939    | 0.812875146 NA |             |
| 444.0418 | 498.86   | 483.1072 | 0.027987    | 0.901096965    | 0.91817406  |
| 0        | 0.928976 | 1.047955 | #DIV/0! NA  | NA             |             |
| 798.7392 | 665.1466 | 785.9662 | 0.185063    | 0.554725555    | 0.545985077 |
| 511.0501 | 582.4678 | 532.3611 | 0.119314    | 0.8892252      | 0.566141749 |
| 810.3539 | 779.4107 | 805.8773 | 0.325194    | 0.230144662    | 0.013575411 |
| 4284.065 | 4253.78  | 3722.336 | 0.081839    | 0.020689285    | 0.731333029 |
| 6363.11  | 6422.009 | 5830.821 | 0.075952    | 0.066189238    | 0.741368284 |
| 8474.319 | 8744.449 | 8501.01  | -0.24065    | 0.134073214    | 0.00280023  |
| 427.0664 | 373.4483 | 347.921  | 0.028165    | 0.730407446    | 0.939380143 |
| 1320.511 | 1307.069 | 1279.553 | 0.173498    | 0.581539609    | 0.359873864 |
| 1573.355 | 1535.597 | 1549.925 | 0.041442    | 0.071137852    | 0.825886448 |
| 1680.569 | 1589.478 | 1586.604 | 0.064997    | 0.649891554    | 0.709370809 |
| 1792.249 | 1944.346 | 2053.992 | 0.11298     | 0.783760899    | 0.578896646 |
| 779.9768 | 862.0895 | 897.0494 | 0.00561     | 0.952783825    | 0.992528568 |
| 159.0331 | 161.6418 | 146.7137 | -0.29285    | 0.09408214     | 0.291835413 |

|          |          |          |             |             |             |
|----------|----------|----------|-------------|-------------|-------------|
| 5710.896 | 5843.258 | 4874.038 | -0.06961    | 0.000616166 | 0.768568541 |
| 1533.15  | 1416.688 | 1482.856 | 0.191496    | 0.393551305 | 0.126868093 |
| 933.6492 | 864.8764 | 1137.031 | 0.1225      | 0.212716004 | 0.611282744 |
| 1242.781 | 1249.472 | 1229.251 | 0.08909     | 0.922856432 | 0.626527921 |
| 544.1076 | 494.2151 | 560.6559 | 0.029059    | 0.826883467 | 0.923725803 |
| 552.1486 | 549.0247 | 587.9027 | 0.133802    | 0.614621507 | 0.658878607 |
| 911.3131 | 916.8991 | 795.3978 | 0.040694    | 0.907095813 | 0.865063191 |
| 18.76233 | 13.93464 | 17.81523 | 0.464032    | 0.962433805 | NA          |
| 71.47554 | 75.24704 | 81.74048 | 0.194917    | 0.478184092 | 0.69424407  |
| 0        | 0        | 0        | #NUM! NA    | NA          |             |
| 0        | 0.928976 | 0        | -1.86025 NA | NA          |             |
| 804.9933 | 928.9758 | 691.6502 | 0.032352    | 0.122553551 | 0.915543523 |
| 61.64765 | 52.95162 | 52.39774 | 0.139091    | 0.901380807 | 0.840777068 |
| 0        | 0        | 0        | #NUM! NA    | NA          |             |
| 751.3866 | 774.7658 | 804.8294 | -0.10651    | 0.820906044 | 0.625457131 |
| 3621.13  | 3663.88  | 3131.289 | 0.111242    | 0.405505718 | 0.499756226 |
| 188.5167 | 163.4997 | 144.6178 | 0.238005    | 0.302724041 | 0.518234816 |
| 2490.029 | 2700.533 | 2117.917 | -0.07534    | 0.05699652  | 0.740018919 |
| 1.786889 | 0.928976 | 2.09591  | -0.32004 NA | NA          |             |
| 15291.3  | 14914.71 | 15745.52 | -0.28939    | 0.919799198 | 0.033123987 |
| 6657.947 | 7025.844 | 7070.552 | 0.036564    | 0.415980367 | 0.835596295 |
| 4.467221 | 5.573855 | 8.383639 | 0.330971    | 0.825200136 | NA          |
| 1037.289 | 1214.171 | 1021.756 | -0.14751    | 0.859611064 | 0.498498627 |
| 1620.708 | 1774.344 | 1492.288 | 0.169417    | 0.285839486 | 0.352934781 |
| 1333.912 | 1251.33  | 1416.835 | -0.24008    | 0.853331381 | 0.204865574 |
| 2811.669 | 2774.851 | 3014.966 | -0.24016    | 0.868785389 | 0.05825118  |
| 650.4274 | 712.5244 | 775.4866 | 0.008862    | 0.861862766 | 0.975406172 |
| 1366.97  | 1360.021 | 1332.999 | 0.088453    | 0.110845457 | 0.664215073 |
| 4612.853 | 4354.109 | 4275.656 | 0.056697    | 0.817609984 | 0.819964665 |
| 0        | 0        | 0        | #NUM! NA    | NA          |             |
| 478.8861 | 497.002  | 452.7165 | -0.29457    | 0.044964859 | 0.144968034 |
| 0.893444 | 0        | 0        | -3.44782 NA | NA          |             |
| 663.8291 | 704.1636 | 769.1989 | -0.26543    | 0.92790798  | 0.093149564 |
| 334.1482 | 354.8687 | 357.3526 | 0.083731    | 0.559366656 | 0.802920813 |
| 0        | 2.786927 | 0        | -1.86025 NA | NA          |             |
| 467.2713 | 456.1271 | 453.7645 | 0.208837    | 0.207579254 | 0.408058591 |
| 2092.446 | 2225.826 | 2077.047 | -0.03237    | 0.000217366 | 0.87466351  |
| 26729.17 | 27426.15 | 27145.18 | -0.36489    | 0.826883467 | 0.012748693 |
| 6486.405 | 6776.878 | 7091.511 | -0.24639    | 0.91441696  | 0.151699323 |
| 3119.014 | 2960.646 | 3273.811 | -0.15235    | 0.959739969 | 0.270288837 |
| 3624.703 | 3474.369 | 3295.818 | 0.217593    | 0.283964296 | 0.060344767 |
| 209.9594 | 202.5167 | 265.1326 | -0.0786     | 0.818107632 | 0.845206982 |
| 1663.593 | 1662.867 | 1458.753 | 0.079429    | 0.285144055 | 0.678741853 |
| 301.0907 | 282.4086 | 266.1805 | -0.13175    | 0.903964934 | 0.628282957 |
| 1429.511 | 1380.458 | 1256.498 | 0.1363      | 0.526561206 | 0.391432089 |
| 24679.61 | 24524.96 | 24449.84 | -0.28153    | 0.730407446 | 0.049157122 |
| 373.4597 | 328.8574 | 307.0508 | -0.10736    | 0.772432927 | 0.748961137 |
| 193922.1 | 186558.8 | 218181.1 | -0.43123    | 0.911468001 | 0.004352618 |
| 226.9348 | 248.9655 | 242.0776 | 0.229522    | 0.728952588 | 0.536664638 |
| 1081.068 | 1148.214 | 1111.88  | -0.31747    | 0.660321043 | 0.004593992 |
| 1754.725 | 1635.926 | 1581.364 | 0.041426    | 0.640224868 | 0.812861677 |
| 1034.608 | 1019.086 | 1195.717 | -0.05443    | 0.550503835 | 0.8325893   |
| 599.5011 | 570.3911 | 532.3611 | 0.086103    | 0.573411006 | 0.718291318 |
| 522.6649 | 496.0731 | 512.4499 | 0.127726    | 0.416166733 | 0.55841527  |

|          |          |          |          |             |             |
|----------|----------|----------|----------|-------------|-------------|
| 0        | 0.928976 | 0        | #DIV/0!  | NA          | NA          |
| 0.893444 | 0        | 0        | #DIV/0!  | NA          | NA          |
| 0        | 0        | 0        | #NUM!    | NA          | NA          |
| 0        | 0        | 0        | #NUM!    | NA          | NA          |
| 3052.899 | 3101.85  | 2770.793 | -0.02638 | 0.005035345 | 0.877477421 |
| 3254.817 | 3251.415 | 3105.09  | -0.02732 | 0.024420121 | 0.891411326 |
| 1619.814 | 1701.884 | 1557.261 | -0.00617 | 0.43802737  | 0.982230296 |
| 92.02476 | 84.53679 | 56.58956 | 0.332557 | 0.798409569 | 0.58759663  |
| 3528.211 | 3340.597 | 3079.939 | 0.216976 | 0.006208168 | 0.283557823 |
| 14354.08 | 14320.16 | 15547.46 | -0.31839 | 0.68563527  | 0.024919247 |
| 1125.74  | 1233.68  | 1147.511 | 0.027219 | 0.708696414 | 0.890884082 |
| 32.16399 | 34.3721  | 40.87024 | -0.1616  | 0.92444453  | NA          |
| 72.36898 | 99.40041 | 63.92525 | 0.102024 | 0.242725862 | 0.883471187 |
| 998.8707 | 931.7627 | 910.6728 | 0.02512  | 0.081224331 | 0.91372954  |
| 1593.905 | 1515.159 | 1466.089 | 0.027509 | 0.286526774 | 0.91372954  |
| 92.02476 | 79.89192 | 105.8434 | -0.04112 | 0.779325825 | 0.937994709 |
| 192.0905 | 220.1673 | 220.0705 | -0.10879 | 0.88874568  | 0.713405771 |
| 2045.094 | 2139.431 | 1751.133 | -0.03393 | 0.071245169 | 0.905168779 |
| 908.6328 | 795.2033 | 702.1298 | 0.216966 | 0.935100162 | 0.439570865 |
| 708.5013 | 784.9845 | 746.1439 | -0.16267 | 0.638519612 | 0.443275405 |
| 27.69677 | 26.01132 | 14.67137 | -0.49809 | 0.798030968 | NA          |
| 0        | 3.715903 | 4.19182  | -1.07882 | NA          | NA          |
| 82.19687 | 95.6845  | 95.3639  | 0.49413  | 0.881060269 | 0.360674621 |
| 674.5504 | 777.5527 | 733.5684 | 0.245966 | 0.324610791 | 0.12530366  |
| 928.2886 | 863.9475 | 869.8026 | 0.323714 | 0.059452673 | 0.069345614 |
| 19397.57 | 19201.93 | 20800.86 | -0.36355 | 0.814880408 | 0.004688416 |
| 234.0824 | 308.42   | 254.653  | 0.137879 | 0.976681492 | 0.6924902   |
| 325.2137 | 339.0762 | 265.1326 | -0.17712 | 0.780429274 | 0.624554774 |
| 19.65577 | 14.86361 | 33.53456 | 0.524355 | 0.439271214 | NA          |
| 4767.419 | 4577.993 | 4890.805 | -0.01948 | 0.904254847 | 0.897989514 |
| 1254.396 | 1252.259 | 1195.717 | 0.16056  | 0.55061661  | 0.316157156 |
| 297.5169 | 277.7638 | 258.8449 | 0.509238 | 0.894061214 | 0.063275758 |
| 874.6819 | 954.9871 | 912.7687 | -0.08305 | 0.632040487 | 0.660222897 |
| 409.1975 | 430.1158 | 465.292  | 0.006317 | 0.269120346 | 0.992866088 |
| 318.9596 | 326.9995 | 320.6742 | 0.051435 | 0.368085564 | 0.882926075 |
| 81.30343 | 72.46011 | 90.12412 | 0.297205 | 0.842806932 | 0.531682752 |
| 19.65577 | 14.86361 | 29.34274 | -0.21619 | 0.690588843 | NA          |
| 1246.355 | 1242.97  | 1213.532 | 0.087344 | 0.377099016 | 0.775439768 |
| 23927.33 | 23735.33 | 26307.86 | -0.0129  | 0.380779612 | 0.941511899 |
| 0        | 1.857952 | 2.09591  | 0.229302 | NA          | NA          |
| 426.1729 | 443.1214 | 440.1411 | 0.156567 | 0.677154401 | 0.542805648 |
| 70.5821  | 63.17035 | 78.59662 | -0.0367  | 0.324651337 | 0.952535643 |
| 781.7637 | 739.4647 | 784.9182 | 0.156068 | 0.886112674 | 0.434560808 |
| 8.934443 | 23.22439 | 13.62341 | -0.69948 | 0.938838346 | NA          |
| 729.944  | 720.8852 | 806.9253 | 0.005803 | 0.44898062  | 0.990444813 |
| 3242.309 | 3299.722 | 2901.787 | 0.180398 | 0.083350036 | 0.354829766 |
| 3.573777 | 2.786927 | 2.09591  | -0.38799 | NA          | NA          |
| 2619.579 | 2616.925 | 2364.186 | -0.03077 | 5.38978E-05 | 0.883471187 |
| 131.3363 | 110.5481 | 142.5219 | 0.383679 | 0.185931343 | 0.311435996 |
| 5059.575 | 5008.108 | 4787.058 | -0.00154 | 0.000886762 | 0.992729462 |
| 36983.23 | 36378.69 | 36587.25 | -0.28243 | 0.848681983 | 0.060870852 |
| 1851.217 | 1642.429 | 1800.387 | -0.04519 | 0.036638284 | 0.82132239  |
| 79.51654 | 78.96294 | 58.68547 | 0.553639 | 0.637091947 | 0.287569887 |
| 6675.815 | 6516.765 | 6689.096 | -0.29326 | 0.817609984 | 0.005150683 |

|          |          |          |             |                |             |
|----------|----------|----------|-------------|----------------|-------------|
| 407.4106 | 307.491  | 292.3794 | 0.390792    | 0.759261525    | 0.123535461 |
| 6115.626 | 5938.942 | 6437.587 | 0.260322    | 0.837998472    | 0.092351218 |
| 6518.569 | 6060.638 | 6027.837 | -0.19373    | 0.396423722    | 0.368062441 |
| 1377.691 | 1419.475 | 1274.313 | 0.091662    | 0.221789876    | 0.642738974 |
| 1223.125 | 1330.293 | 1258.594 | 0.129584    | 0.475821599    | 0.388495658 |
| 905.9525 | 816.5697 | 858.2751 | 0.355713    | 0.848681983    | 0.043133767 |
| 2091.553 | 1891.395 | 1970.155 | -0.08841    | 0.334053294    | 0.572969021 |
| 235.8693 | 329.7864 | 294.4753 | -0.4477     | 0.868914561    | 0.060644712 |
| 1168.625 | 1211.384 | 1165.326 | 0.20793     | 0.948896953    | 0.149449076 |
| 645.9602 | 721.8142 | 710.5134 | 0.130087    | 0.4878075      | 0.54849911  |
| 1755.618 | 1956.423 | 1876.887 | -0.1969     | 0.962011634    | 0.190192716 |
| 466.3779 | 509.0787 | 493.5868 | 0.275998    | 0.938838346    | 0.142189757 |
| 296.6235 | 303.7751 | 290.2835 | 0.001093    | 0.185391819    | 0.990023409 |
| 695.9931 | 570.3911 | 754.5275 | -0.22623    | 0.981762093    | 0.225238011 |
| 0.893444 | 0        | 0        | -0.55981 NA | NA             |             |
| 3216.399 | 3098.134 | 3378.607 | 0.147987    | 0.846759683    | 0.351487828 |
| 509.2632 | 529.5162 | 565.8956 | -0.01916    | 0.131849064    | 0.936794868 |
| 7473.661 | 6889.284 | 7641.687 | 0.017236    | 0.147626297    | 0.931798896 |
| 293.9432 | 284.2666 | 360.4965 | -0.02017    | 0.285144055    | 0.952666818 |
| 1267.797 | 1211.384 | 1128.647 | 0.387768    | 0.443341372    | 0.036086837 |
| 3812.327 | 3557.048 | 3733.863 | 0.10253     | 0.759069408    | 0.588371763 |
| 8.934443 | 11.14771 | 10.47955 | 0.745468    | 0.813397158 NA |             |
| 335.935  | 435.6896 | 436.9972 | -0.16009    | 0.817609984    | 0.558104763 |
| 0        | 0        | 2.09591  | #DIV/0! NA  | NA             |             |
| 2604.39  | 2764.632 | 2616.743 | 0.059395    | 0.107676441    | 0.753881265 |
| 924.7148 | 1014.442 | 1017.564 | -0.09683    | 0.769573539    | 0.596309029 |
| 3268.219 | 3052.614 | 3184.735 | 0.078644    | 0.759261525    | 0.529445162 |
| 1522.429 | 1601.554 | 1679.872 | -0.0367     | 0.505612976    | 0.841070222 |
| 448.509  | 412.4652 | 402.4147 | -0.03723    | 0.234225111    | 0.889954225 |
| 7722.932 | 7815.473 | 7856.518 | -0.09742    | 0.887028326    | 0.468374832 |
| 40.20499 | 48.30674 | 66.02116 | -0.46099    | 0.831870041    | 0.357441003 |
| 2512.365 | 2400.473 | 2346.371 | 0.091039    | 0.106548765    | 0.639253997 |
| 33.95088 | 20.43747 | 45.06206 | -0.52404    | 0.926756894    | 0.565559013 |
| 62.5411  | 34.3721  | 36.67842 | 0.258141    | 0.897759686    | 0.723437511 |
| 1023.887 | 1097.12  | 1213.532 | -0.02862    | 0.596065856    | 0.91372954  |
| 16.97544 | 13.93464 | 20.9591  | 0.043766    | 0.652050398 NA |             |
| 384.181  | 396.6727 | 455.8604 | 0.110506    | 0.774889037    | 0.778199039 |
| 761.2145 | 710.6665 | 641.3484 | 0.077653    | 0.812111557    | 0.751339004 |
| 10.72133 | 1.857952 | 14.67137 | -0.02722    | 0.658567464 NA |             |
| 104.533  | 119.8379 | 163.481  | 0.001948    | 0.523530764    | 0.999675887 |
| 929.182  | 936.4076 | 834.1721 | 0.351441    | 0.310443697    | 0.065668139 |
| 681.698  | 599.1894 | 575.3272 | 0.348002    | 0.324651337    | 0.070299477 |
| 125.9756 | 157.9259 | 151.9535 | 0.168798    | 0.828016939    | 0.760432859 |
| 886.2967 | 776.6237 | 914.8646 | -0.1009     | 0.999825784    | 0.640018073 |
| 97.38542 | 98.47143 | 113.1791 | -0.13358    | 0.427509427    | 0.818869867 |
| 558.4027 | 584.3258 | 749.2877 | 0.058045    | 0.475984345    | 0.857210686 |
| 270.7136 | 215.5224 | 215.8787 | 0.127383    | 0.973922065    | 0.680886616 |
| 1268.691 | 1082.257 | 1082.537 | 0.120088    | 0.325451376    | 0.665181522 |
| 725.4767 | 711.5954 | 767.103  | 0.145112    | 0.285144055    | 0.572718815 |
| 362.7384 | 401.3175 | 465.292  | -0.16232    | 0.780980494    | 0.542274871 |
| 1121.273 | 1045.098 | 1030.14  | 0.09112     | 0.486116151    | 0.748270161 |
| 605.7552 | 555.5275 | 496.7306 | 0.143762    | 0.872688807    | 0.665181522 |
| 769.2555 | 837.9361 | 848.8435 | -0.19543    | 0.503345543    | 0.345371472 |
| 791.5916 | 758.0442 | 725.1848 | 0.08751     | 0.844410461    | 0.660222897 |

[illegible]

[illegible]

[illegible]

[illegible]



[illegible]

[illegible]

| EdgeR FDR_G  | EdgeR FDR_E  | EdgeR FDR_GE | logFC_G   | logFC_E   | logFC_GE  | Gene Sym          |
|--------------|--------------|--------------|-----------|-----------|-----------|-------------------|
| 0            | 2. 11162E-22 | 4. 7478E-05  | 4. 710321 | 0. 76902  | 0. 776607 | FIT3              |
| 0            | 7. 76736E-23 | 0. 000588078 | 4. 343715 | 0. 99971  | 0. 884277 | FIT2              |
| 0            | 0. 569517503 | 0. 000805631 | 8. 513084 | 0. 12302  | -5. 3745  | EHD3              |
| 0            | 0. 341849588 | 0. 000827407 | -4. 26702 | -0. 10851 | -0. 64448 | FL011             |
| 0            | 0. 019464433 | 0. 00883753  | -5. 14165 | -0. 28888 | -0. 9461  | YAL065C           |
| 0            | 0. 765135358 | 0. 009006324 | -3. 29564 | 0. 043076 | -0. 55074 | FDH1              |
| 0            | 0. 027370663 | 0. 142407082 | -4. 10047 | -0. 26103 | 0. 4455   | STE6              |
| 0            | 0. 00012681  | 0. 168520344 | 6. 720575 | 0. 379575 | 0. 403278 | MF (ALPHA)        |
| 0            | 0. 936093775 | 0. 197874004 | -9. 79029 | -0. 02303 | 0. 885199 | MFA2              |
| 0            | 0. 407136042 | 0. 235407237 | -2. 97628 | 0. 086681 | 0. 277229 | EFT2              |
| 0            | 0. 003277486 | 0. 241562819 | -4. 94446 | -0. 35856 | -0. 4436  | FL09              |
| 0            | 0. 806307841 | 0. 26370665  | -11. 7039 | 0. 058727 | -3. 56345 | FL010             |
| 0            | 4. 85742E-10 | 0. 293969078 | 7. 736513 | 0. 93065  | 1. 561877 | ARN2              |
| 0            | 0. 231604832 | 0. 430239299 | 5. 356079 | -0. 17614 | 0. 390751 | COS5              |
| 0            | 0. 628397894 | 0. 449495496 | -8. 17047 | -0. 09236 | 0. 842899 | AGA2              |
| 0            | 0. 746926462 | 0. 459099096 | -8. 34015 | -0. 04966 | 0. 384737 | STE2              |
| 0            | 1. 03382E-05 | 0. 509608089 | 11. 81727 | 0. 583668 | -2. 13892 | MAL11             |
| 0            | 1. 24275E-06 | 0. 600468279 | 10. 58723 | 0. 576502 | 1. 422408 | ENB1              |
| 0            | 0. 14551117  | 0. 69956533  | -5. 66481 | -0. 19482 | 0. 25552  | BAR1              |
| 0            | 0. 025326351 | 0. 807027851 | 2. 921372 | 0. 214437 | -0. 11111 | YHB1              |
| 0            | 0. 230929934 | 0. 87592683  | 6. 832219 | 0. 15659  | -0. 14515 | STE3              |
| 0            | 0. 152200112 | 0. 889079564 | 5. 49858  | 0. 18567  | 0. 104638 | SAG1              |
| 0            | 0. 492734305 | 0. 907281575 | -9. 58468 | -0. 13405 | 0. 689822 | YIL014C- <i>l</i> |
| 0            | 0. 031070961 | 0. 953514172 | 4. 593255 | 0. 213242 | -0. 05808 | AFB1              |
| 0            | 0. 000179933 | 0. 972259946 | -5. 01889 | 0. 494491 | 0. 085768 | PCK1              |
| 0            | 0. 025415061 | 1            | 11. 7986  | -0. 41279 | -0. 41345 | YOL159C- <i>l</i> |
| 0            | 0. 289051446 | 1            | 3. 817915 | 0. 149975 | 0. 02189  | COS4              |
| 0            | 0. 391096287 | 1            | 3. 410634 | -0. 08135 | -0. 01697 | KRS1              |
| 0            | 0. 505793014 | 1            | -4. 78527 | 0. 112582 | 0. 043552 | YEL073C           |
| 0            | 0. 805302069 | 1            | -6. 19957 | 0. 056616 | 0. 048756 | SNZ3              |
| 0            | 0. 871135401 | 1            | -4. 29733 | -0. 03739 | -0. 02208 | YCL049C           |
| 1. 0437E-306 | 0. 295659    | 0. 29930175  | -3. 64625 | 0. 139076 | 0. 331968 | THI7              |
| 1. 9773E-304 | 0. 657453737 | 1            | 10. 54456 | 0. 176744 | -0. 09462 | MF (ALPHA)        |
| 2. 2786E-304 | 0. 986843508 | 0. 795907717 | -7. 71244 | 0. 019957 | 0. 511901 | MFA1              |
| 4. 4381E-296 | 0. 015182854 | 0. 014857079 | 4. 233924 | 0. 362358 | 0. 847374 | IMA1              |
| 1. 3774E-286 | 0. 411661642 | 0. 802035501 | -4. 54558 | -0. 1408  | -0. 23789 | YAL064W- <i>I</i> |
| 3. 905E-283  | 0. 836107259 | 1            | -12. 1829 | 0. 070568 | -0. 07069 | HMRA1             |
| 7. 1133E-278 | 0. 883064096 | 0. 32087275  | -2. 63279 | -0. 02526 | 0. 261878 | ARO10             |
| 2. 4326E-262 | 0. 109990533 | 1            | -11. 4933 | 0. 322338 | -0. 32282 | YJL218W           |
| 3. 2259E-258 | 0. 768264114 | 1            | 11. 13426 | -0. 09143 | -0. 09163 | MAL13             |
| 3. 6492E-252 | 0. 398327474 | 1            | 2. 742094 | -0. 10826 | -0. 02247 | HBN1              |
| 3. 71E-252   | 0. 451996377 | 1            | -11. 4954 | 0. 180015 | -0. 1803  | PGU1              |
| 4. 1417E-247 | 0. 446288659 | 0. 933469902 | -6. 29698 | 0. 16556  | 0. 256237 | SNZ2              |
| 3. 4684E-245 | 0. 006455564 | 0. 420929331 | -5. 75273 | 0. 517992 | -0. 55346 | AQY1              |
| 1. 4829E-234 | 0. 515760255 | 5. 95983E-05 | -2. 48685 | -0. 07781 | -0. 73848 | UBX6              |
| 1. 211E-223  | 0. 905759808 | 0. 267503245 | 1. 686172 | -0. 01626 | 0. 211219 | EFT2              |
| 7. 1769E-221 | 2. 96228E-17 | 0. 533418515 | -1. 89839 | 0. 515573 | 0. 161894 | CTR3              |
| 5. 5138E-217 | 0. 188573634 | 0. 417425061 | -6. 36675 | 0. 286456 | -1. 05374 | COS6              |
| 4. 9557E-214 | 0. 017246708 | 0. 711541955 | -1. 88434 | 0. 184122 | 0. 119368 | IRC7              |
| 5. 014E-204  | 0. 622972832 | 0. 626633158 | 1. 970577 | 0. 055888 | 0. 154591 | ADH2              |

|              |              |              |           |           |           |         |
|--------------|--------------|--------------|-----------|-----------|-----------|---------|
| 8. 4133E-200 | 0. 98408428  | 0. 042142302 | 2. 553187 | -0. 01206 | -0. 5179  | FDC1    |
| 1. 2677E-199 | 0. 496224832 | 0. 979797115 | -8. 37765 | 0. 181371 | 0. 370788 | VTH2    |
| 3. 5155E-199 | 0. 47612507  | 0. 952440864 | -6. 31778 | 0. 183913 | 0. 235966 | YEL077C |
| 4. 3634E-197 | 0. 795533688 | 0. 777291545 | -8. 09189 | -0. 085   | -1. 10381 | RDT1    |
| 1. 3942E-196 | 0. 256874534 | 0. 404345893 | 3. 560844 | 0. 202772 | -0. 39261 | MAL33   |
| 5. 3956E-192 | 0. 005227243 | 0. 643429399 | 4. 053539 | 0. 47642  | -0. 36618 | ENA5    |
| 1. 8139E-191 | 8. 00081E-06 | 4. 96566E-13 | 2. 131557 | 0. 377994 | -1. 1814  | FMP48   |
| 3. 0324E-190 | 1. 90606E-11 | 0. 204980083 | 1. 633876 | 0. 406106 | 0. 244118 | HSP104  |
| 4. 2932E-188 | 1. 50591E-09 | 0. 744376434 | -5. 73596 | 1. 07095  | -0. 44099 | PH089   |
| 2. 2501E-187 | 0. 089587852 | 0. 575130318 | -2. 91873 | 0. 221794 | 0. 256881 | SMX3    |
| 4. 3563E-187 | 0. 084977816 | 0. 446640364 | 1. 764429 | 0. 145842 | 0. 190481 | SFA1    |
| 1. 4905E-186 | 4. 75894E-09 | 0. 024892656 | -3. 3792  | 0. 693619 | -0. 74812 | FMP45   |
| 1. 1155E-183 | 0. 005293865 | 2. 07221E-05 | 1. 727811 | 0. 215622 | 0. 63596  | FET3    |
| 1. 1154E-179 | 0. 20626184  | 0. 085923561 | -2. 53808 | 0. 156562 | -0. 4617  | CYB2    |
| 4. 6238E-178 | 8. 1361E-06  | 0. 798608504 | 2. 944726 | 0. 535197 | 0. 174056 | TIS11   |
| 1. 1197E-175 | 0. 137864205 | 0. 243549962 | 2. 468677 | 0. 186686 | 0. 365776 | DOG2    |
| 1. 7382E-174 | 0. 099278382 | 0. 50705979  | -2. 67016 | 0. 206687 | -0. 26799 | GND2    |
| 1. 2183E-172 | 0. 612847593 | 0. 592065914 | -2. 14189 | 0. 064864 | 0. 185147 | TEF1    |
| 7. 7813E-167 | 0. 840784015 | 0. 474290885 | 1. 546551 | 0. 024766 | 0. 170976 | TEF1    |
| 8. 9396E-167 | 0. 719429107 | 0. 890182184 | -2. 89158 | 0. 066905 | 0. 120572 | FLO1    |
| 5. 5953E-166 | 0. 762436308 | 1            | 4. 213966 | 0. 089288 | -0. 02466 | MAL31   |
| 2. 2916E-162 | 0. 03246642  | 0. 615820553 | -1. 83841 | -0. 18793 | 0. 160193 | MRH1    |
| 2. 3353E-162 | 0. 157263376 | 1            | 10. 45614 | 0. 401856 | 0. 403209 | CSS3    |
| 5. 5309E-162 | 1. 16401E-07 | 0. 766734697 | 3. 939187 | 0. 83854  | 0. 247961 | MAL32   |
| 2. 5731E-161 | 0. 793839626 | 0. 894445004 | -2. 10382 | 0. 039427 | 0. 087287 | COA2    |
| 2. 1945E-154 | 0. 483584986 | 0. 264879577 | -8. 47087 | -0. 19563 | 3. 379724 | SN03    |
| 2. 1083E-152 | 0. 304258036 | 0. 493450262 | 2. 571731 | -0. 15702 | -0. 2966  | PRM5    |
| 1. 4304E-151 | 0. 569517503 | 0. 996250082 | 2. 11618  | -0. 07941 | 0. 042247 | IMD2    |
| 2. 088E-150  | 7. 60973E-07 | 0. 08281148  | -2. 18966 | 0. 449394 | 0. 435479 | FMP16   |
| 3. 0679E-149 | 3. 87209E-06 | 0. 919926509 | 1. 617483 | 0. 331709 | 0. 060991 | HSP82   |
| 9. 92E-143   | 2. 42059E-08 | 0. 000222678 | 1. 336175 | 0. 329779 | -0. 50215 | GSY1    |
| 2. 7957E-142 | 6. 72684E-13 | 0. 992505689 | -2. 37435 | 0. 685903 | 0. 049238 | PNS1    |
| 2. 9334E-142 | 0. 934743268 | 0. 720083939 | -1. 45147 | 0. 013806 | 0. 110437 | TIF1    |
| 3. 5982E-142 | 3. 8513E-20  | 0. 340583382 | 1. 591633 | 0. 607864 | 0. 226221 | HSP42   |
| 5. 1014E-140 | 0. 000118538 | 0. 844390643 | 1. 944626 | 0. 35873  | -0. 10794 | FRE4    |
| 8. 7716E-139 | 0. 445190402 | 1            | -10. 0499 | 0. 206968 | -0. 20739 | DDI3    |
| 1. 9763E-137 | 0. 977693292 | 0. 747048811 | 3. 52605  | -0. 02141 | -0. 28725 | YNL034W |
| 1. 8377E-136 | 0. 096099628 | 0. 328463464 | -1. 69856 | -0. 15438 | -0. 24133 | ERG5    |
| 1. 4322E-135 | 0. 995096172 | 0. 89826709  | -2. 17073 | 0. 009305 | 0. 094479 | EEB1    |
| 1. 0601E-134 | 0. 302105614 | 0. 096995994 | 2. 889456 | 0. 186022 | 0. 622583 | HSP30   |
| 8. 9229E-134 | 0. 000649548 | 0. 378603211 | -1. 4604  | -0. 24439 | -0. 20023 | YGR079W |
| 5. 9506E-133 | 0. 384932157 | 0. 589775129 | 1. 350242 | -0. 07606 | 0. 141176 | KAR2    |
| 2. 3103E-132 | 0. 454754335 | 0. 069148732 | -2. 25503 | 0. 106363 | -0. 49387 | COX26   |
| 1. 8915E-129 | 0. 001389186 | 0. 059232365 | -1. 87061 | -0. 29968 | -0. 42922 | TIR4    |
| 4. 4572E-127 | 0. 758162333 | 0. 978193638 | 1. 40695  | 0. 035518 | -0. 03708 | HXK2    |
| 5. 0685E-125 | 0. 004004613 | 0. 800614102 | 5. 428371 | 0. 77035  | -0. 44992 | MAL12   |
| 2. 2271E-124 | 0. 976915818 | 0. 711317454 | -2. 83196 | 0. 017414 | 0. 229349 | NCA3    |
| 6. 2552E-124 | 0. 196724669 | 0. 689558052 | -1. 62588 | 0. 125774 | 0. 14263  | PET10   |
| 3. 4313E-123 | 0. 860955797 | 1            | -2. 13901 | 0. 034742 | -0. 02914 | CSS2    |
| 8. 2006E-122 | 0. 686382379 | 0. 28514767  | 1. 267981 | -0. 04035 | 0. 211402 | TIF1    |
| 1. 9619E-121 | 0. 051484274 | 0. 324301066 | -2. 63364 | 0. 279271 | -0. 3906  | GAP1    |
| 2. 0401E-121 | 0. 080620238 | 1            | 9. 971244 | 0. 540375 | 0. 542685 | YER188W |
| 3. 8869E-121 | 0. 072884259 | 0. 996250082 | 1. 359458 | -0. 14508 | 0. 030284 | HXT4    |
| 1. 8027E-120 | 0. 140485465 | 1            | -3. 47968 | 0. 284426 | 0. 038457 | HPA2    |

|              |              |              |             |           |           |         |
|--------------|--------------|--------------|-------------|-----------|-----------|---------|
| 2. 1131E-120 | 0. 008068108 | 0. 949031652 | -4. 40986   | 0. 534606 | 0. 182787 | ECM12   |
| 1. 3436E-119 | 0. 012650856 |              | 1 -1. 29617 | -0. 17982 | 0. 020383 | PRY2    |
| 1. 4797E-118 | 3. 43381E-12 | 0. 770752057 | -2. 13406   | 0. 661481 | 0. 153966 | NQM1    |
| 9. 9562E-118 | 0. 892744236 |              | 1 -10. 1342 | 0. 06782  | -0. 06802 | YKR104W |
| 1. 0128E-117 | 0. 097493121 | 0. 042142302 | 1. 551111   | -0. 15857 | -0. 41362 | YHR112C |
| 1. 7952E-117 | 0. 505136536 | 0. 251462984 | -1. 82771   | 0. 083955 | -0. 3147  | HMX1    |
| 1. 3027E-115 | 0. 78818634  | 0. 172556429 | -7. 44257   | 0. 098694 | 3. 631728 | YFR057W |
| 4. 0538E-115 | 0. 410849697 | 0. 281242785 | -3. 3154    | 0. 174611 | 0. 585879 | YMR321C |
| 4. 1624E-115 | 0. 001963602 | 0. 921286576 | -2. 67811   | -0. 43504 | -0. 1121  | AQY2    |
| 4. 8029E-115 | 0. 05078776  | 0. 617215067 | -1. 63505   | 0. 184719 | 0. 169671 | YGP1    |
| 5. 1394E-114 | 0. 214770818 | 0. 555225439 | -2. 68474   | -0. 20349 | -0. 30207 | PRM7    |
| 6. 0083E-114 | 4. 7614E-06  | 0. 545272974 | -3. 89835   | 0. 797195 | 0. 416351 | HSP12   |
| 1. 2265E-110 | 0. 386354047 | 0. 26370665  | -1. 71037   | 0. 100989 | 0. 297477 | CYC1    |
| 1. 6975E-109 | 0. 98811108  |              | 1 4. 81374  | -0. 02421 | 0. 011565 | YHR219W |
| 4. 6057E-108 | 0. 569289414 |              | 1 -10. 2652 | -0. 22041 | 0. 221207 | NFT1    |
| 7. 6746E-108 | 0. 030221222 | 0. 484474484 | -2. 58776   | 0. 32032  | 0. 356186 | ATG34   |
| 2. 5292E-107 | 0. 276167395 | 0. 791580335 | -2. 26823   | 0. 163335 | 0. 166841 | YER186C |
| 2. 1269E-106 | 0. 109495914 | 0. 806662883 | -2. 77442   | -0. 26906 | 0. 191332 | YLL053C |
| 6. 5979E-105 | 0. 009754686 | 0. 057460658 | 2. 290509   | -0. 36328 | -0. 60707 | TIR2    |
| 2. 2323E-104 | 2. 8142E-14  | 0. 283510967 | 1. 953227   | 0. 734937 | 0. 352034 | SIT1    |
| 6. 476E-104  | 7. 31945E-19 | 4. 99598E-11 | 1. 236154   | 0. 537252 | -0. 85117 | HXT2    |
| 2. 219E-101  | 5. 38755E-16 | 0. 742563863 | -1. 99492   | 0. 767446 | 0. 165765 | PHO84   |
| 6. 7172E-101 | 0. 655308895 | 1. 2293E-06  | -1. 99453   | -0. 07258 | -1. 05108 | STR3    |
| 4. 1954E-100 | 0. 124795835 | 0. 031266694 | -2. 30067   | 0. 223691 | 0. 669141 | YR02    |
| 4. 3517E-99  | 0. 138509482 | 0. 712613882 | -1. 83822   | 0. 177541 | 0. 17326  | YLR046C |
| 8. 1555E-99  | 0. 017747826 | 0. 006151828 | -1. 3432    | 0. 196207 | -0. 48258 | ARG1    |
| 2. 57122E-97 | 4. 8916E-05  | 0. 139514641 | 2. 513445   | 0. 579198 | -0. 58274 | HXT6    |
| 3. 81453E-97 | 0. 3855976   | 0. 951428598 | -1. 63472   | -0. 1038  | 0. 060212 | CYB5    |
| 5. 72999E-97 | 0. 980110212 | 0. 768691181 | 1. 412497   | 0. 010155 | 0. 118106 | MNN5    |
| 5. 76612E-97 | 0. 118813668 | 0. 859769494 | 1. 08197    | -0. 11575 | -0. 06852 | URA4    |
| 7. 06149E-97 | 0. 907732085 | 0. 457137216 | -1. 32324   | 0. 018756 | -0. 19319 | EHT1    |
| 1. 20637E-95 | 0. 673042136 | 0. 905065494 | 2. 612438   | 0. 097228 | -0. 13657 | COS1    |
| 1. 62446E-95 | 0. 040742569 | 0. 808567391 | -1. 34597   | 0. 175149 | 0. 098364 | None    |
| 2. 68206E-93 | 0. 860003201 |              | 1 -1. 52434 | 0. 029188 | 0. 027479 | ERG3    |
| 1. 13098E-92 | 0. 01637518  | 0. 715570823 | -3. 1491    | 0. 449141 | -0. 31877 | YHR022C |
| 1. 40053E-90 | 0. 669617672 | 0. 00883753  | -1. 42604   | 0. 05329  | 0. 51663  | TAT1    |
| 5. 29487E-90 | 0. 758588991 | 0. 7225564   | -2. 90734   | 0. 076799 | 0. 318904 | COS7    |
| 5. 68573E-90 | 2. 09773E-17 | 0. 017068248 | 1. 122894   | 0. 505491 | 0. 391053 | HSP78   |
| 1. 30635E-89 | 0. 749122844 | 0. 678833479 | -2. 29764   | 0. 067764 | 0. 25288  | YER187W |
| 2. 04655E-89 | 2. 5751E-16  | 0. 017074244 | 1. 339124   | 0. 582476 | 0. 465965 | EGO4    |
| 1. 46519E-88 | 0. 726657504 | 0. 28514767  | -1. 31128   | -0. 04297 | 0. 251454 | PHO3    |
| 9. 13185E-88 | 0. 895841581 | 0. 907544049 | 1. 223777   | 0. 020313 | 0. 065098 | TDH2    |
| 2. 77032E-85 | 0. 36814865  |              | 1 -1. 37651 | 0. 097385 | 0. 015471 | COX5A   |
| 8. 09642E-85 | 0. 234261318 |              | 1 -1. 23068 | -0. 10993 | -0. 0104  | CHO2    |
| 1. 30465E-84 | 6. 97719E-09 | 2. 41586E-09 | 1. 356068   | 0. 451967 | -0. 96516 | NRG2    |
| 1. 70527E-83 | 0. 915720176 | 0. 545272974 | -8. 21445   | -0. 07578 | -2. 57166 | AAD15   |
| 2. 99044E-82 | 0. 929429208 | 0. 769965504 | -1. 88584   | 0. 024481 | -0. 16747 | GYP8    |
| 1. 74885E-81 | 0. 533524502 |              | 1 -9. 86133 | 0. 270348 | -0. 27169 | None    |
| 2. 84623E-81 | 1. 28038E-08 | 4. 65146E-09 | -1. 24437   | 0. 404191 | -0. 86875 | CTT1    |
| 7. 07661E-81 | 0. 655801161 | 0. 533418515 | 1. 335321   | -0. 05702 | -0. 19585 | PRY3    |
| 6. 37824E-80 | 0. 007154715 | 0. 817868751 | -1. 15537   | -0. 21009 | 0. 090983 | HMG1    |
| 3. 71987E-79 | 0. 972383608 | 0. 69956533  | 1. 892966   | -0. 01659 | -0. 20962 | YML131W |
| 1. 94295E-78 | 0. 028520862 | 0. 017068248 | -1. 79245   | 0. 270112 | 0. 645558 | ARO9    |
| 2. 88176E-78 | 0. 828465678 | 0. 017297064 | -2. 00128   | 0. 04774  | -0. 71305 | PIR3    |

|              |              |              |           |           |           |                   |
|--------------|--------------|--------------|-----------|-----------|-----------|-------------------|
| 1. 27252E-77 | 0. 290897532 | 0. 69828171  | -1. 94945 | 0. 162764 | 0. 218537 | ATG36             |
| 1. 27252E-77 | 0. 010256893 | 0. 708495578 | 2. 097917 | -0. 38716 | 0. 235285 | YPL277C           |
| 3. 42832E-76 | 6. 38852E-05 | 0. 002316113 | -1. 17745 | -0. 29848 | -0. 51595 | SAM2              |
| 6. 28909E-76 | 0. 0122332   | 0. 125375403 | 3. 002929 | 0. 536875 | -0. 83986 | YLR036C           |
| 4. 40537E-75 | 6. 17915E-05 | 0. 860187522 | 1. 54479  | 0. 403468 | -0. 11072 | YER079W           |
| 1. 5724E-74  | 0. 689168252 | 0. 306543708 | 1. 553411 | -0. 0633  | -0. 32106 | ECM22             |
| 2. 0671E-74  | 0. 762146426 | 0. 956492205 | -1. 22064 | -0. 03868 | -0. 05065 | ERG10             |
| 2. 77744E-74 | 0. 039495936 | 1            | -9. 26512 | -0. 67206 | 0. 674695 | YLR460C           |
| 1. 20224E-73 | 0. 981817797 | 0. 938399843 | 2. 08459  | -0. 0168  | 0. 099272 | SMA2              |
| 7. 86369E-73 | 0. 021107766 | 0. 010751875 | 1. 630001 | 0. 278635 | 0. 66058  | ARN1              |
| 1. 5416E-72  | 0. 0122332   | 0. 220954671 | -1. 47863 | 0. 262859 | 0. 343672 | YPR010C- <i>f</i> |
| 2. 12134E-72 | 0. 93529408  | 0. 001799415 | 3. 242428 | 0. 04314  | -1. 73625 | YHL044W           |
| 3. 3356E-72  | 4. 11288E-13 | 1. 01919E-05 | 1. 734332 | 0. 753714 | -1. 03896 | ICY1              |
| 4. 28187E-72 | 0. 914594311 | 0. 924605282 | -6. 35434 | -0. 06286 | 0. 624094 | VBA3              |
| 4. 44359E-72 | 0. 001129793 | 0. 077372954 | -1. 51166 | 0. 331402 | 0. 451631 | TSA2              |
| 5. 07593E-72 | 0. 005971008 | 0. 223381301 | -1. 35397 | 0. 261114 | 0. 314725 | RPS22B            |
| 9. 47158E-72 | 1            | 0. 721271027 | 1. 564822 | 0. 004829 | -0. 17202 | ADH5              |
| 1. 97493E-71 | 0. 134487173 | 0. 598611712 | -1. 55408 | -0. 18018 | -0. 212   | IZH1              |
| 2. 01824E-71 | 0. 184854161 | 0. 777291545 | -1. 25189 | 0. 132109 | 0. 116778 | CYT1              |
| 2. 7161E-71  | 1            | 0. 717705244 | 1. 173396 | -0. 00615 | -0. 13076 | YKR018C           |
| 6. 83856E-71 | 0. 145608335 | 0. 904680493 | -1. 20251 | 0. 137865 | -0. 07112 | FAA1              |
| 2. 57078E-70 | 0. 997292987 | 1            | -8. 8701  | -0. 02244 | 0. 022524 | VBA5              |
| 3. 97296E-70 | 6. 54753E-15 | 3. 88711E-07 | 1. 105561 | 0. 523625 | -0. 75714 | AIM17             |
| 1. 97019E-69 | 0. 032400162 | 0. 352843224 | -2. 89008 | 0. 41609  | -0. 65957 | SUE1              |
| 5. 52108E-69 | 0. 477410911 | 1            | 1. 012677 | -0. 06731 | -0. 01329 | INA1              |
| 6. 65801E-69 | 0. 567411892 | 1            | -2. 88309 | -0. 15044 | -0. 05338 | YMR244W           |
| 1. 18608E-68 | 0. 362927385 | 0. 907281575 | 0. 986766 | -0. 08141 | -0. 05968 | NPT1              |
| 1. 19412E-68 | 0. 653568266 | 0. 711247098 | 1. 255641 | -0. 05841 | -0. 14617 | MLF3              |
| 2. 07468E-68 | 0. 044230009 | 0. 484106841 | -1. 32672 | 0. 202072 | 0. 22281  | None              |
| 3. 24528E-68 | 0. 94100612  | 1            | -1. 02749 | -0. 01333 | 0. 018657 | IDI1              |
| 1. 01382E-67 | 0. 345281679 | 0. 764622115 | -2. 24542 | 0. 180665 | -0. 2176  | YLL056C           |
| 1. 57686E-67 | 0. 98685381  | 1            | -1. 27651 | 0. 009364 | 0. 011027 | ERG24             |
| 3. 20797E-67 | 1            | 0. 704009942 | 1. 207592 | -0. 00238 | -0. 14463 | SUT2              |
| 3. 22881E-66 | 1. 7725E-18  | 3. 36001E-11 | 1. 327309 | 0. 717612 | 1. 174806 | SSA4              |
| 3. 46464E-66 | 0. 157263376 | 0. 298558417 | -1. 35615 | -0. 15658 | -0. 29193 | SCM4              |
| 5. 70188E-66 | 9. 11881E-08 | 0. 000400404 | 1. 026722 | 0. 361449 | -0. 5519  | SDS24             |
| 6. 69692E-66 | 4. 8916E-05  | 0. 32467013  | -1. 18463 | 0. 325044 | -0. 24969 | CYC7              |
| 8. 49802E-66 | 0. 477410911 | 0. 681411478 | -1. 6225  | 0. 106111 | -0. 19909 | PRY1              |
| 1. 39945E-65 | 0. 946937461 | 0. 289206404 | -1. 35113 | -0. 01691 | -0. 29665 | ELO1              |
| 2. 53929E-64 | 0. 003275972 | 1. 58678E-05 | 1. 900437 | 0. 420781 | -1. 17654 | CIT2              |
| 6. 55909E-64 | 0. 122926465 | 0. 919516515 | 0. 95767  | -0. 12516 | 0. 056111 | GFA1              |
| 7. 41937E-64 | 0. 225195997 | 0. 697639077 | -1. 28258 | -0. 13404 | -0. 15727 | YEH1              |
| 1. 82895E-63 | 0. 030015186 | 1            | -0. 93339 | 0. 159352 | -0. 01855 | LSC1              |
| 2. 31891E-63 | 0. 04701393  | 0. 223381301 | -1. 2489  | -0. 19737 | 0. 314859 | SLP1              |
| 1. 47432E-62 | 0. 332602552 | 1            | -0. 92176 | -0. 08229 | -0. 00871 | MVD1              |
| 1. 86308E-62 | 0. 374998623 | 0. 7990478   | 4. 134283 | -0. 30803 | 0. 5052   | PAU8              |
| 1. 08677E-61 | 0. 077481906 | 0. 601496564 | -1. 28059 | 0. 184633 | 0. 189306 | QCR9              |
| 4. 24037E-61 | 0. 040357896 | 0. 13805534  | -2. 21027 | 0. 353558 | -0. 63085 | RSB1              |
| 8. 55251E-61 | 0. 111956571 | 0. 669483248 | -1. 05642 | 0. 14146  | 0. 141018 | COX4              |
| 9. 34809E-61 | 0. 650518689 | 0. 070441681 | 2. 24575  | 0. 112387 | -0. 76973 | FLO5              |
| 4. 8842E-60  | 0. 103071132 | 0. 099020366 | 1. 609602 | 0. 226865 | 0. 522537 | FRE2              |
| 1. 20624E-59 | 0. 914995243 | 0. 341937853 | 0. 918668 | -0. 01624 | -0. 20281 | RNR4              |
| 3. 86727E-59 | 0. 086223435 | 0. 166524458 | -1. 2312  | 0. 177019 | 0. 347151 | COX12             |
| 1. 22626E-58 | 0. 035394486 | 0. 777291545 | 1. 496683 | 0. 264311 | -0. 1575  | APT2              |

|              |              |                                                    |
|--------------|--------------|----------------------------------------------------|
| 1. 58053E-58 | 0. 820966378 | 0. 944544569 -1. 68486 -0. 0484 -0. 08599 COS12    |
| 1. 67181E-58 | 0. 019540108 | 0. 058656331 -1. 33168 0. 249336 0. 465427 COX7    |
| 2. 72171E-57 | 0. 488044682 | 0. 05005618 -3. 25389 -0. 21083 1. 280358 FEX2     |
| 3. 02613E-57 | 2. 68527E-07 | 0. 00384257 -1. 40608 0. 497414 0. 690571 INH1     |
| 3. 40339E-57 | 0. 164194878 | 0. 349940473 -1. 29003 0. 158299 0. 283316 YPR127W |
| 3. 88726E-57 | 0. 011080935 | 0. 016422539 1. 726341 0. 363283 0. 758739 VMR1    |
| 1. 16413E-56 | 0. 507360916 | 0. 484106841 0. 886199 0. 061197 -0. 16722 SED1    |
| 1. 96557E-56 | 0. 010256893 | 0. 865801776 1. 892383 -0. 41136 -0. 15503 YCR102C |
| 2. 75872E-56 | 0. 159515372 | 0. 978338942 -1. 69536 0. 209026 0. 065613 BNA5    |
| 7. 99277E-56 | 0. 001613442 | 0. 283481217 0. 877498 -0. 22228 -0. 21786 PLB2    |
| 4. 32787E-55 | 0. 48908547  | 0. 698712509 1. 007048 -0. 07325 0. 135915 PGA3    |
| 4. 44207E-55 | 1            | 0. 786137812 -2. 44673 0. 008879 -0. 25311 TEN1    |
| 9. 97321E-55 | 0. 067063438 | 0. 985804511 -1. 17737 0. 185884 -0. 04241 DLD1    |
| 3. 76819E-54 | 0. 196968379 | 0. 56739618 4. 701004 0. 461926 -1. 1641 None      |
| 3. 8357E-54  | 0. 312265984 | 0. 611449773 -1. 53506 0. 149555 0. 24117 YOR238W  |
| 5. 11738E-54 | 0. 139167921 | 0. 711541955 -0. 85061 -0. 11469 -0. 10995 ITR1    |
| 8. 31477E-54 | 1            | 0. 920405239 0. 974123 0. 002136 0. 061334 SCH9    |
| 8. 70112E-54 | 0. 199012093 | 0. 152940749 -1. 79859 0. 211096 -0. 54062 AAD10   |
| 1. 15795E-53 | 0. 413008972 | 0. 888371569 0. 884057 -0. 07516 -0. 06716 UTR2    |
| 1. 7914E-53  | 0. 152890044 | 0. 904680493 -1. 70184 0. 21859 -0. 11519 HBT1     |
| 1. 92429E-53 | 0. 760915703 | 1 -3. 55742 0. 115046 0. 037296 SIP18              |
| 1. 94371E-53 | 0. 733844269 | 0. 752830626 -1. 25403 0. 051906 -0. 14393 ERG29   |
| 2. 82169E-53 | 0. 021955716 | 1 2. 817188 0. 557681 -0. 06847 RCK1               |
| 3. 06771E-53 | 0. 156840624 | 0. 822329423 1. 263213 -0. 16918 -0. 12272 YGL039W |
| 4. 43708E-53 | 0. 10288549  | 0. 482770834 1. 079522 0. 161184 0. 211502 RIB4    |
| 5. 21417E-53 | 0. 005839442 | 0. 818523526 -0. 87813 -0. 20185 -0. 08504 ERG13   |
| 5. 58959E-53 | 0. 144550842 | 0. 867310986 2. 596904 0. 354662 -0. 22002 YPL278C |
| 1. 00306E-52 | 0. 929795254 | 0. 971609311 -1. 30046 0. 02138 -0. 0576 NEJ1      |
| 1. 56134E-52 | 0. 000827676 | 0. 255041627 -0. 95041 0. 253177 -0. 24936 TMA17   |
| 6. 57983E-52 | 0. 812862656 | 0. 169547502 0. 849663 -0. 02775 -0. 25869 RNR2    |
| 2. 40715E-51 | 0. 651526803 | 0. 91703897 -4. 01608 0. 171104 0. 335375 ENA1     |
| 3. 30685E-51 | 9. 00139E-10 | 0. 227690315 1. 600451 0. 718113 -0. 44762 YNR014W |
| 6. 59839E-51 | 0. 516700017 | 0. 85743687 -1. 08117 -0. 07593 -0. 09413 YGL101W  |
| 7. 87148E-51 | 0. 194243001 | 0. 89915479 -2. 89599 0. 336656 -0. 22289 YHR140W  |
| 1. 08382E-50 | 0. 69190085  | 0. 564416885 -6. 59808 -0. 19057 -2. 45276 YFL067W |
| 1. 09896E-50 | 0. 713873054 | 1 -0. 85523 -0. 03888 0. 011189 ERG6               |
| 1. 42369E-50 | 6. 02083E-07 | 0. 577042274 1. 940592 0. 736056 -0. 33563 YNL194C |
| 2. 60408E-50 | 0. 574872729 | 1 0. 834961 0. 054207 0. 021663 GLR1               |
| 3. 8308E-50  | 0. 721368967 | 0. 711257523 0. 856566 0. 038976 0. 117108 PGK1    |
| 7. 9988E-50  | 1. 05046E-24 | 0. 958971364 -1. 0756 0. 759043 0. 054722 OM14     |
| 1. 30418E-49 | 0. 776818407 | 0. 906168502 -1. 18742 0. 043692 0. 083667 RPL22B  |
| 2. 59601E-49 | 0. 310202666 | 0. 522217116 -1. 08608 -0. 11306 0. 207084 MSH1    |
| 6. 16377E-49 | 0. 434822927 | 1 2. 371535 0. 203032 -0. 0824 AYT1                |
| 8. 30072E-49 | 1            | 0. 492136803 -1. 88071 -0. 00434 -0. 39097 YLR030W |
| 1. 24213E-48 | 0. 650085956 | 0. 029197458 1. 398636 -0. 07873 -0. 61755 HMS1    |
| 1. 74471E-48 | 0. 371648425 | 1 1. 245376 0. 120743 -0. 00991 GYP7               |
| 1. 85213E-48 | 0. 542558974 | 1 -2. 68013 0. 173682 -0. 03877 YOL118C            |
| 4. 49124E-48 | 0. 525158576 | 1 -3. 17955 0. 202575 -0. 12459 DCG1               |
| 6. 22396E-48 | 0. 013676019 | 0. 029970437 -1. 01573 0. 22214 0. 443219 COX8     |
| 9. 34907E-48 | 0. 009383928 | 0. 918382276 -1. 26966 0. 290167 0. 085251 ODC1    |
| 9. 46849E-48 | 0. 08182657  | 0. 593717896 0. 883644 0. 147711 0. 154634 CPR6    |
| 2. 15951E-47 | 0. 303874634 | 0. 041755209 1. 407668 0. 15422 -0. 59334 YAK1     |
| 5. 68774E-47 | 0. 267371286 | 0. 839890676 0. 896129 -0. 10545 -0. 08815 RPN1    |
| 6. 33995E-47 | 0. 002804181 | 5. 06852E-08 -0. 76664 0. 199501 0. 683365 HPF1    |

|              |              |              |           |           |           |                   |
|--------------|--------------|--------------|-----------|-----------|-----------|-------------------|
| 6. 98821E-47 | 5. 56603E-23 | 0. 019048423 | 1. 773623 | 1. 276551 | 0. 849991 | FIT1              |
| 8. 00571E-47 | 3. 93115E-08 | 0. 803816091 | 1. 058096 | 0. 453136 | -0. 11553 | YIR016W           |
| 8. 46152E-47 | 0. 028520862 | 0. 405149238 | 1. 232201 | 0. 253077 | -0. 28324 | BNA6              |
| 1. 14139E-46 | 0. 759694936 | 0. 094839053 | -1. 61863 | 0. 065259 | -0. 58732 | TKL2              |
| 2. 38763E-46 | 0. 053274021 | 0. 215066762 | 1. 640084 | 0. 303457 | -0. 49286 | GAC1              |
| 2. 56424E-46 | 0. 615223063 | 0. 328463464 | -1. 18358 | -0. 0717  | -0. 30321 | ARA2              |
| 4. 27994E-46 | 0. 378159684 | 0. 74594446  | 1. 924464 | -0. 19046 | 0. 252847 | SPO21             |
| 1. 23355E-45 | 0. 928674902 | 0. 188377816 | 1. 118064 | 0. 020647 | -0. 3528  | SNX4              |
| 1. 33337E-45 | 0. 720422379 | 0. 379383422 | 6. 242347 | 0. 190062 | 2. 915094 | DDI3              |
| 2. 09615E-45 | 0. 102540414 | 1. 10658E-05 | 0. 835774 | -0. 13615 | -0. 64054 | HIS4              |
| 4. 03532E-45 | 0. 406769713 | 1            | -0. 93551 | -0. 08621 | -0. 00017 | ERG25             |
| 5. 2429E-45  | 0. 637757348 | 0. 931005601 | 1. 109485 | 0. 066307 | -0. 07031 | DIF1              |
| 9. 56594E-45 | 0. 001225541 | 0. 121458281 | -0. 9012  | 0. 254187 | 0. 316248 | MCR1              |
| 1. 11176E-44 | 0. 00098634  | 0. 175291985 | 1. 392872 | 0. 405362 | -0. 45094 | CMK2              |
| 2. 85588E-44 | 0. 967457599 | 0. 669524096 | -1. 17661 | 0. 014673 | -0. 1861  | YFH7              |
| 3. 01137E-44 | 0. 529464272 | 0. 807027851 | 4. 475536 | -0. 28267 | 0. 671536 | YML133C           |
| 7. 16911E-44 | 0. 058256084 | 0. 908303081 | -1. 3645  | 0. 246598 | 0. 100262 | QCR10             |
| 9. 4438E-44  | 0. 016099167 | 0. 420929331 | 2. 118966 | -0. 49014 | -0. 52329 | YCR100C           |
| 1. 26832E-43 | 0. 156939743 | 0. 449106932 | -0. 9408  | 0. 135683 | 0. 209314 | COX6              |
| 1. 59684E-43 | 0. 998303878 | 1            | 3. 036698 | 0. 021165 | -0. 02839 | MST27             |
| 3. 58372E-43 | 0. 678241823 | 0. 049980756 | 3. 006434 | 0. 164449 | -1. 27444 | MAN2              |
| 1. 2255E-42  | 0. 970013423 | 1            | 1. 585874 | 0. 019956 | -0. 01047 | KIN82             |
| 2. 47759E-42 | 0. 16612431  | 0. 672010939 | 4. 118743 | -0. 52033 | 0. 898616 | YNR075C- <i>+</i> |
| 2. 55463E-42 | 0. 187412702 | 0. 817868751 | -4. 0796  | 0. 447773 | -0. 60725 | THI5              |
| 2. 67392E-42 | 0. 284831522 | 0. 597863762 | -1. 77238 | 0. 201818 | -0. 33841 | YLR031W           |
| 9. 72866E-42 | 8. 72349E-05 | 0. 067121145 | 1. 593843 | 0. 551982 | -0. 65753 | YLR149C           |
| 3. 01429E-41 | 0. 005726133 | 0. 015213313 | -0. 82403 | 0. 214852 | 0. 426696 | NDE1              |
| 3. 85891E-41 | 0. 455741185 | 0. 213690034 | -0. 78598 | 0. 069499 | 0. 249867 | RPS4A             |
| 4. 55991E-41 | 0. 598147339 | 0. 592391518 | 0. 894589 | -0. 06163 | -0. 16916 | GAL80             |
| 8. 25007E-41 | 0. 425297662 | 0. 74594446  | 1. 71626  | -0. 16284 | -0. 23144 | JSN1              |
| 1. 28574E-40 | 0. 007698559 | 1            | 0. 796111 | 0. 20735  | -0. 02703 | GLO1              |
| 2. 02939E-40 | 2. 78205E-06 | 0. 793455902 | 0. 833232 | 0. 337457 | 0. 101654 | YDL124W           |
| 2. 07646E-40 | 0. 98811108  | 0. 856077623 | -2. 00757 | -0. 01788 | 0. 191343 | YER053C- <i>+</i> |
| 2. 21877E-40 | 0. 162783034 | 1            | 0. 718289 | 0. 108797 | 0. 020114 | APD1              |
| 2. 80032E-40 | 0. 01626178  | 0. 361862491 | -3. 24366 | 0. 70803  | 0. 831502 | DAL1              |
| 2. 91821E-40 | 0. 02375103  | 0. 022570781 | 1. 018443 | 0. 23204  | -0. 51013 | YPL247C           |
| 3. 32629E-40 | 0. 788431804 | 0. 804576171 | 1. 513058 | -0. 06129 | -0. 17794 | ECM34             |
| 3. 77714E-40 | 0. 684890005 | 0. 562048326 | -0. 94271 | -0. 05192 | -0. 1855  | ERG26             |
| 4. 60089E-40 | 0. 500936572 | 1            | 7. 894569 | -0. 36524 | -0. 3687  | PAU24             |
| 8. 64957E-40 | 0. 032210521 | 0. 031200361 | -1. 13195 | 0. 240906 | -0. 53913 | VID24             |
| 9. 09338E-40 | 5. 66115E-06 | 0. 151369301 | -0. 71894 | -0. 28299 | -0. 25576 | EXG1              |
| 9. 09338E-40 | 0. 034194294 | 0. 972764042 | -0. 72757 | 0. 154755 | -0. 0364  | RAS2              |
| 1. 0531E-39  | 0. 012654875 | 0. 84918567  | -0. 85354 | -0. 20919 | -0. 08628 | OLE1              |
| 1. 9575E-39  | 0. 036556402 | 1            | -1. 27594 | -0. 26791 | -0. 03576 | RGS2              |
| 2. 13381E-39 | 0. 086190501 | 0. 859769494 | 0. 853496 | -0. 15618 | 0. 0855   | KTI12             |
| 3. 46389E-39 | 0. 003427909 | 0. 609220601 | -3. 11142 | 0. 774761 | -0. 65757 | UGA4              |
| 3. 95567E-39 | 1            | 0. 786584362 | -2. 40762 | -0. 01244 | 0. 30523  | HXT8              |
| 6. 03041E-39 | 0. 134427143 | 0. 664126703 | 0. 837526 | 0. 13738  | -0. 1444  | GUT1              |
| 9. 16072E-39 | 0. 010917159 | 0. 133200553 | -0. 95598 | 0. 240762 | 0. 35378  | YMR090W           |
| 2. 13268E-38 | 0. 758146893 | 0. 98198617  | 1. 228695 | 0. 057453 | -0. 05742 | FUS1              |
| 2. 20953E-38 | 2. 00864E-05 | 0. 096973919 | 1. 157373 | 0. 447326 | -0. 46569 | MRK1              |
| 2. 56534E-38 | 0. 97665513  | 0. 843533194 | 1. 379655 | -0. 01693 | -0. 14908 | YER134C           |
| 2. 57598E-38 | 0. 026262642 | 0. 931568877 | -0. 71462 | 0. 161953 | -0. 04819 | LSC2              |
| 3. 08236E-38 | 0. 46286428  | 0. 290162005 | -0. 79661 | -0. 0723  | 0. 233824 | RCF2              |



|              |              |                                                    |
|--------------|--------------|----------------------------------------------------|
| 3. 08236E-38 | 0. 870423644 | 1 -0. 77379 0. 022617 -0. 00401 HEM12              |
| 4. 40502E-38 | 0. 323714622 | 0. 771931968 -0. 93413 0. 108489 -0. 12189 ZRT1    |
| 6. 11244E-38 | 0. 737659987 | 0. 839890676 -0. 90293 0. 044378 -0. 09748 YNL134C |
| 6. 37598E-38 | 0. 276237448 | 1 -3. 79431 -0. 4395 0. 136153 BSC1                |
| 6. 61282E-38 | 4. 62271E-06 | 0. 58793448 -1. 47024 0. 582091 0. 285687 YNL195C  |
| 1. 45483E-37 | 0. 100174653 | 0. 87592683 -1. 29135 0. 225324 0. 120511 GRE2     |
| 1. 47264E-37 | 0. 001475204 | 0. 116060268 -0. 74167 -0. 2278 -0. 28706 ERG1     |
| 1. 52646E-37 | 0. 006732239 | 0. 840202254 -0. 77652 -0. 21069 -0. 08407 ACS2    |
| 1. 52711E-37 | 0. 286101355 | 0. 469965664 1. 41587 -0. 18157 -0. 33462 FRK1     |
| 1. 60686E-37 | 0. 538147246 | 0. 12136599 1. 487834 0. 120099 -0. 57536 MGA1     |
| 1. 80755E-37 | 0. 885106299 | 0. 164318185 0. 899239 0. 025217 -0. 32778 DDI1    |
| 3. 29227E-37 | 0. 413618808 | 1 -0. 72622 -0. 07306 -0. 00857 ERG9               |
| 4. 18883E-37 | 1            | 0. 005175755 -0. 74167 -0. 00248 0. 449853 ERG2    |
| 4. 58447E-37 | 0. 983012168 | 0. 590394506 1. 440912 -0. 0163 -0. 28837 YHL042W  |
| 4. 69683E-37 | 0. 402010292 | 0. 243765908 1. 161215 0. 12096 0. 376717 RPL1B    |
| 5. 68372E-37 | 0. 464159202 | 0. 013997445 0. 981398 -0. 09265 -0. 54829 SRL3    |
| 6. 66958E-37 | 0. 133335918 | 0. 587251805 0. 774509 -0. 13083 -0. 156 RPT1      |
| 8. 60244E-37 | 1. 3186E-20  | 0. 08281148 -1. 18765 0. 889771 -0. 49245 YHR033W  |
| 1. 53536E-36 | 0. 894801769 | 0. 712488585 0. 91968 -0. 02404 0. 146851 HSC82    |
| 2. 02662E-36 | 0. 653029567 | 0. 931005601 -1. 50807 -0. 09354 0. 104187 FPK1    |
| 2. 02662E-36 | 0. 713530484 | 0. 931568877 -0. 77408 -0. 04187 0. 053731 ERG8    |
| 2. 32716E-36 | 0. 012133386 | 0. 163693857 0. 951409 0. 25043 -0. 35201 YKR011C  |
| 3. 28078E-36 | 0. 000508482 | 0. 818523526 0. 904683 0. 306314 -0. 10808 UBI4    |
| 3. 63063E-36 | 0. 039547582 | 0. 561567789 0. 846316 -0. 1884 -0. 17932 RQC2     |
| 5. 11359E-36 | 0. 652629347 | 1 -1. 32097 -0. 08317 0. 046779 YNL040W            |
| 5. 25839E-36 | 0. 940255249 | 0. 289206404 -0. 8715 -0. 01594 0. 265015 RRP46    |
| 5. 53087E-36 | 0. 000648063 | 0. 563376575 1. 031332 0. 344641 -0. 21766 SIS1    |
| 5. 66415E-36 | 0. 570336862 | 0. 255041627 1. 771444 0. 137645 0. 57593 DOG1     |
| 8. 49326E-36 | 0. 019432143 | 0. 738189833 -0. 83311 -0. 20408 -0. 12267 MSC7    |
| 2. 80058E-35 | 0. 518133314 | 0. 93147427 -2. 14105 0. 172334 -0. 1598 YKL065W-1 |
| 2. 95002E-35 | 0. 013695435 | 0. 118862393 1. 269151 0. 332443 -0. 51026 YAP5    |
| 3. 03024E-35 | 1            | 0. 817868751 0. 734029 0. 001686 -0. 08959 APA1    |
| 3. 51715E-35 | 0. 048237469 | 0. 099783852 0. 880453 0. 19103 0. 369989 GRX1     |
| 3. 68468E-35 | 1. 4131E-17  | 0. 008362627 -0. 90467 -0. 65615 -0. 53894 DAN1    |
| 6. 69203E-35 | 0. 713873054 | 0. 003795849 -1. 07156 -0. 05883 0. 687928 PDC5    |
| 7. 64415E-35 | 0. 860071452 | 0. 362845506 1. 504832 0. 049479 0. 433739 GIP1    |
| 8. 01649E-35 | 0. 09555214  | 0. 420929331 -0. 78905 0. 146953 0. 20416 QCR6     |
| 8. 6083E-35  | 0. 005966489 | 1 -2. 23631 0. 608546 -0. 01483 GRE1               |
| 9. 06296E-35 | 0. 431938847 | 0. 836674365 1. 618579 0. 166396 -0. 18761 AQY3    |
| 1. 12771E-34 | 0. 050189688 | 0. 011211089 1. 117141 0. 243129 -0. 65375 YLR177W |
| 1. 24811E-34 | 1            | 0. 040783448 1. 22555 -0. 00019 -0. 61471 VHS3     |
| 1. 43977E-34 | 0. 001843378 | 0. 011781836 -0. 74712 0. 234452 0. 434501 QCR7    |
| 2. 92229E-34 | 0. 000286932 | 0. 06526418 -0. 72444 0. 256564 -0. 32754 GPP2     |
| 4. 43322E-34 | 0. 051527774 | 1 -0. 89209 0. 190257 0. 022259 RIP1               |
| 9. 32878E-34 | 0. 324679283 | 0. 7990478 0. 932487 0. 117551 0. 122231 TOH1      |
| 1. 02316E-33 | 0. 024386386 | 0. 239034519 3. 345272 -0. 76022 -1. 41951 YAR066W |
| 1. 1284E-33  | 0. 834204    | 1 -1. 16371 0. 042552 0. 017211 PSR1               |
| 1. 55136E-33 | 0. 335596279 | 0. 360013074 0. 89605 0. 111197 -0. 25928 FMP52    |
| 2. 38871E-33 | 0. 968276508 | 0. 661759663 -0. 79278 0. 011363 -0. 1466 SCS7     |
| 4. 29404E-33 | 0. 008822013 | 0. 635840497 -1. 55059 0. 423312 0. 307458 YIL029C |
| 4. 55652E-33 | 6. 60621E-07 | 0. 607000533 1. 069811 0. 504416 -0. 22032 GPM2    |
| 5. 06911E-33 | 0. 427585494 | 0. 147719526 1. 148332 0. 122114 -0. 4557 YAP6     |
| 9. 60121E-33 | 0. 177946472 | 0. 653725725 -6. 3108 0. 560845 -2. 42287 None     |
| 2. 1892E-32  | 0. 977602377 | 0. 235142919 -0. 79921 -0. 0103 -0. 27954 PKH1     |

|              |              |              |           |           |           |           |
|--------------|--------------|--------------|-----------|-----------|-----------|-----------|
| 2. 85093E-32 | 0. 002104078 | 0. 532461006 | -1. 07995 | -0. 34757 | 0. 251098 | ATF2      |
| 3. 01168E-32 | 0. 413242794 | 0. 119718988 | -5. 06715 | 0. 368755 | 3. 838316 | YNL146C-1 |
| 4. 10039E-32 | 0. 177324846 | 0. 862693719 | -1. 23895 | 0. 199058 | 0. 133647 | APQ12     |
| 4. 13714E-32 | 0. 709900242 | 0. 972387712 | -0. 7478  | 0. 043527 | 0. 041899 | RHO3      |
| 4. 21636E-32 | 0. 391890423 | 0. 711247098 | -0. 89018 | 0. 100168 | -0. 15053 | PIC2      |
| 4. 68605E-32 | 0. 713873054 | 0. 511755541 | 1. 171777 | 0. 06893  | -0. 28421 | UBP9      |
| 5. 36659E-32 | 0. 986843508 | 0. 620580042 | 0. 71274  | -0. 0079  | -0. 14636 | RPN3      |
| 7. 48002E-32 | 0. 138242749 | 0. 000270263 | 0. 80647  | -0. 14587 | -0. 64316 | LYS1      |
| 1. 41027E-31 | 0. 759529423 | 0. 686727083 | -0. 73522 | -0. 03705 | 0. 133671 | ERG28     |
| 1. 4866E-31  | 0. 144030831 | 0. 891813186 | 0. 682735 | 0. 121892 | -0. 06622 | STI1      |
| 1. 52707E-31 | 0. 770087587 | 0. 444473065 | -0. 87132 | 0. 041693 | -0. 23075 | GTR1      |
| 1. 61371E-31 | 1            | 1            | -7. 5702  | -0. 0201  | 0. 020245 | SN04      |
| 1. 88534E-31 | 0. 402601173 | 0. 846846052 | -0. 93963 | 0. 10458  | 0. 108893 | GCV3      |
| 2. 0882E-31  | 0. 919717643 | 0. 938399843 | -0. 82779 | 0. 019363 | -0. 05956 | AIF1      |
| 2. 31058E-31 | 0. 813711396 | 0. 013045788 | 1. 413136 | 0. 059703 | -0. 85921 | SUT1      |
| 3. 70403E-31 | 0. 73093128  | 0. 851392759 | -0. 98616 | 0. 054573 | -0. 11231 | CIR2      |
| 3. 79063E-31 | 0. 363817999 | 0. 764340274 | 1. 47202  | -0. 18107 | 0. 221333 | COS111    |
| 3. 83177E-31 | 0. 060073338 | 0. 807027851 | -1. 75539 | 0. 371254 | -0. 23118 | ZPS1      |
| 4. 14955E-31 | 0. 461111981 | 1            | 1. 03403  | -0. 10714 | -0. 03152 | ATF1      |
| 4. 20395E-31 | 4. 61671E-19 | 0. 284571567 | 0. 638194 | 0. 515816 | 0. 213835 | EMI2      |
| 5. 43468E-31 | 0. 563145324 | 0. 87592683  | 0. 988813 | -0. 08444 | -0. 10354 | HRK1      |
| 5. 599E-31   | 3. 51833E-06 | 0. 221074524 | 1. 948368 | 0. 884328 | 0. 708731 | BTN2      |
| 6. 14682E-31 | 0. 677097244 | 0. 507578381 | 4. 433115 | -0. 23034 | -1. 59389 | YHR213W   |
| 7. 48511E-31 | 1            | 0. 043873822 | 1. 560111 | 0. 001057 | -0. 82724 | AAD4      |
| 8. 46187E-31 | 0. 489296691 | 0. 011931128 | 1. 187287 | -0. 11632 | -0. 73138 | MSN4      |
| 9. 50002E-31 | 0. 624879898 | 0. 920011392 | -1. 25356 | 0. 091275 | -0. 10309 | CAD1      |
| 1. 37806E-30 | 0. 4171016   | 1            | -1. 81511 | 0. 194685 | -0. 03955 | MLS1      |
| 1. 57616E-30 | 0. 089587852 | 1            | -0. 66675 | 0. 135262 | 0. 02458  | MIX17     |
| 1. 86085E-30 | 0. 76984172  | 0. 294796767 | -0. 76443 | 0. 037382 | -0. 25033 | MOT3      |
| 1. 86794E-30 | 0. 882548805 | 0. 568492423 | -2. 99536 | 0. 083253 | -0. 79323 | DAL4      |
| 2. 07108E-30 | 6. 47181E-07 | 0. 467354309 | 1. 543726 | 0. 759363 | -0. 4163  | YJL144W   |
| 2. 3831E-30  | 0. 463310994 | 0. 930420244 | -0. 74903 | -0. 0766  | -0. 05824 | ZRT2      |
| 3. 15246E-30 | 0. 045727816 | 0. 844430869 | 1. 295979 | 0. 307304 | 0. 157264 | AFR1      |
| 3. 97586E-30 | 0. 194770307 | 0. 058656331 | 1. 677346 | 0. 278624 | 0. 855103 | THI72     |
| 4. 06415E-30 | 0. 934679773 | 0. 714788215 | 0. 649814 | -0. 01414 | -0. 11371 | PHD1      |
| 4. 73723E-30 | 0. 743416838 | 0. 243549962 | -1. 08996 | 0. 059114 | 0. 388613 | SIR2      |
| 4. 76508E-30 | 0. 048981072 | 0. 77583136  | -0. 89082 | 0. 205105 | 0. 131067 | UPS2      |
| 5. 81185E-30 | 0. 328875125 | 0. 941464384 | 1. 013263 | 0. 135457 | -0. 07416 | TAD2      |
| 5. 98725E-30 | 0. 905759808 | 0. 853297291 | -2. 32749 | 0. 058769 | -0. 27597 | YPR195C   |
| 6. 0124E-30  | 0. 397478501 | 0. 47679402  | 1. 029063 | -0. 1217  | -0. 27185 | RTK1      |
| 7. 39641E-30 | 0. 624111878 | 0. 894068915 | 4. 080825 | 0. 29104  | 0. 476314 | MATALPHA2 |
| 7. 86415E-30 | 0. 899541977 | 0. 16782387  | 0. 767879 | 0. 021646 | -0. 31193 | GPA2      |
| 8. 84244E-30 | 0. 97988247  | 0. 12136599  | 0. 897233 | 0. 011883 | -0. 39253 | PRM15     |
| 1. 06463E-29 | 0. 70026044  | 0. 357766808 | -1. 18901 | 0. 073006 | -0. 35839 | COX15     |
| 1. 30932E-29 | 0. 171035344 | 0. 053709945 | 0. 833031 | 0. 145914 | -0. 42883 | CTS1      |
| 1. 43772E-29 | 0. 045989617 | 0. 857272986 | -0. 58685 | -0. 13915 | 0. 067987 | NCP1      |
| 1. 95986E-29 | 0. 737846426 | 0. 950592115 | 0. 640382 | -0. 03661 | -0. 04535 | UBP6      |
| 2. 41564E-29 | 0. 604770313 | 0. 92806956  | -0. 69841 | 0. 055341 | 0. 056419 | GDS1      |
| 2. 52387E-29 | 1            | 0. 554211132 | -0. 90486 | 0. 004342 | -0. 21209 | DAP1      |
| 2. 76692E-29 | 0. 818564873 | 0. 603045192 | 0. 64053  | 0. 027538 | -0. 14152 | FRA1      |
| 3. 59016E-29 | 0. 338970995 | 0. 056523979 | -0. 67067 | 0. 087648 | 0. 341244 | RPL8A     |
| 3. 92578E-29 | 0. 92384638  | 0. 339657587 | -0. 73663 | 0. 017434 | 0. 233035 | HHF1      |
| 4. 00112E-29 | 0. 737846426 | 0. 238946444 | -0. 68707 | 0. 038856 | 0. 253075 | YBL081W   |
| 4. 62772E-29 | 0. 033709464 | 0. 7990478   | -0. 75798 | -0. 19043 | -0. 10566 | SAM1      |

|              |              |              |           |           |           |                   |
|--------------|--------------|--------------|-----------|-----------|-----------|-------------------|
| 5. 32505E-29 | 0. 132624237 | 0. 243549962 | 0. 957615 | -0. 18358 | -0. 35142 | ASK10             |
| 5. 56225E-29 | 0. 839560652 | 0. 218100263 | 0. 849288 | -0. 03361 | -0. 32444 | TYE7              |
| 5. 61898E-29 | 0. 488044682 | 0. 264879577 | -4. 05999 | -0. 30859 | 1. 978557 | YJL225C           |
| 6. 40932E-29 | 0. 440961232 | 0. 007546041 | -0. 77304 | 0. 084249 | 0. 514822 | RPS14B            |
| 7. 7401E-29  | 0. 497819776 | 0. 717477893 | 0. 768833 | 0. 076597 | -0. 13613 | GLC8              |
| 9. 56219E-29 | 0. 332333267 | 0. 373162993 | -0. 76057 | 0. 101383 | -0. 23221 | PUT2              |
| 1. 76737E-28 | 0. 980772539 | 0. 990208543 | -0. 82711 | 0. 01078  | 0. 040638 | IES6              |
| 1. 87271E-28 | 0. 33526319  | 0. 717705244 | -0. 66344 | -0. 08864 | -0. 11687 | ANP1              |
| 2. 29734E-28 | 1. 62768E-07 |              | 1         | 0. 969209 | 0. 516849 | 0. 001289 OPI10   |
| 2. 32382E-28 | 0. 068421358 | 0. 420929331 | -1. 14421 | 0. 252191 | 0. 33096  | None              |
| 2. 39536E-28 | 0. 511462308 | 0. 062663543 | 1. 165387 | 0. 114754 | -0. 59291 | YDL241W           |
| 2. 55183E-28 | 0. 663621022 | 0. 947945497 | 0. 801627 | -0. 05732 | -0. 05884 | PEP8              |
| 2. 58783E-28 | 0. 652629347 | 0. 545272974 | 0. 999436 | 0. 073523 | -0. 24619 | HAL1              |
| 3. 64343E-28 | 0. 20100005  | 0. 417425061 | -5. 4446  | 0. 550509 | -3. 2247  | THI12             |
| 4. 40164E-28 | 0. 505136536 |              | 1         | 1. 304157 | -0. 13062 | -0. 05697 YMR265C |
| 6. 05666E-28 | 1. 4333E-13  | 0. 00034954  | -0. 75131 | -0. 53866 | -0. 62103 | MET6              |
| 6. 24764E-28 | 0. 63816324  | 0. 201505014 | -1. 57825 | 0. 115519 | -0. 64211 | IRC4              |
| 6. 92889E-28 | 0. 203402724 | 0. 509579361 | -0. 79704 | -0. 13349 | 0. 206134 | BDF2              |
| 7. 0598E-28  | 1            | 0. 893930829 | 0. 680045 | 0. 005296 | 0. 07002  | ENO2              |
| 7. 17047E-28 | 0. 002804181 | 0. 331627583 | 0. 659134 | 0. 227651 | 0. 218723 | HSP60             |
| 7. 46753E-28 | 0. 97665513  | 0. 410354533 | -0. 67987 | 0. 009657 | -0. 20157 | PDE2              |
| 7. 6377E-28  | 0. 227967015 | 0. 043168161 | 0. 984895 | 0. 161566 | -0. 54403 | PPZ2              |
| 8. 14435E-28 | 3. 22957E-16 | 5. 89829E-07 | 0. 721506 | 0. 569423 | 0. 791254 | HSP26             |
| 9. 82498E-28 | 0. 979039665 | 0. 770001732 | 0. 605363 | -0. 00839 | 0. 095693 | SSE1              |
| 9. 86954E-28 | 0. 781865517 | 0. 16670075  | -4. 54118 | 0. 155034 | -4. 05988 | PRM9              |
| 1. 0178E-27  | 0. 368966584 | 0. 152940749 | 0. 808326 | -0. 10503 | -0. 3497  | YPS1              |
| 1. 0178E-27  | 0. 815832814 | 0. 602319742 | -1. 17672 | 0. 05108  | -0. 26339 | ALD2              |
| 1. 15169E-27 | 0. 970013423 | 0. 599915058 | -0. 72715 | -0. 01123 | -0. 16467 | YOR1              |
| 1. 29843E-27 | 0. 170043734 | 0. 614405454 | 1. 264886 | 0. 229617 | -0. 28251 | ECM10             |
| 1. 59274E-27 | 0. 768264114 | 0. 712529354 | 0. 753797 | -0. 03975 | 0. 139202 | CDC37             |
| 1. 97014E-27 | 0. 887609886 | 0. 582585088 | 0. 6119   | 0. 019536 | -0. 14471 | PRE4              |
| 2. 04931E-27 | 0. 815832814 | 0. 240672347 | 0. 706679 | -0. 03162 | 0. 270586 | GPM1              |
| 2. 13988E-27 | 0. 511462308 | 0. 466577874 | -0. 87476 | -0. 0858  | -0. 24345 | ERT1              |
| 2. 17069E-27 | 0. 004061065 | 0. 710318897 | -1. 45959 | 0. 476125 | -0. 26621 | MEP2              |
| 2. 34723E-27 | 3. 9889E-12  | 0. 001723265 | -0. 61552 | 0. 418261 | 0. 474166 | GPH1              |
| 2. 34723E-27 | 0. 760989947 | 0. 83080918  | 0. 92819  | 0. 051004 | 0. 124679 | CTL1              |
| 2. 69824E-27 | 0. 196724669 |              | 1         | -1. 08685 | 0. 184599 | -0. 03694 PFA5    |
| 2. 76087E-27 | 0. 140700887 | 0. 609220601 | -1. 06321 | -0. 20171 | 0. 237755 | GFD2              |
| 3. 1838E-27  | 0. 030221222 | 0. 854094663 | 0. 853563 | 0. 22911  | -0. 10515 | YHR097C           |
| 3. 54189E-27 | 0. 922329251 | 0. 517080711 | 0. 658665 | 0. 016601 | -0. 17301 | GPD2              |
| 4. 17515E-27 | 0. 462711274 | 0. 977659028 | -0. 84774 | -0. 09191 | -0. 04921 | DSD1              |
| 5. 00142E-27 | 0. 377674449 | 0. 842613421 | 1. 071703 | 0. 138312 | 0. 138796 | YOL014W           |
| 7. 05572E-27 | 0. 320534014 | 0. 74313321  | 0. 587221 | 0. 083856 | -0. 10053 | PRE10             |
| 7. 54327E-27 | 0. 936226276 |              | 1         | 1. 204678 | 0. 027309 | -0. 02889 YPK2    |
| 1. 04762E-26 | 0. 55847489  | 0. 800614102 | 0. 579579 | 0. 053791 | -0. 08544 | GSF2              |
| 1. 05659E-26 | 0. 295242295 | 0. 290162005 | 0. 797301 | -0. 11963 | -0. 28446 | DIG1              |
| 1. 2327E-26  | 0. 423652434 | 0. 00020131  | 0. 681768 | -0. 08149 | -0. 60462 | DLD3              |
| 1. 57652E-26 | 2. 87517E-46 |              | 1         | -0. 57917 | 0. 778378 | 0. 00629 SUC2     |
| 2. 76605E-26 | 0. 017283264 | 0. 020433989 | 1. 739183 | 0. 517074 | -1. 10839 | MAN2              |
| 3. 2323E-26  | 0. 000779302 | 0. 197911929 | -0. 78206 | 0. 299427 | 0. 321151 | QCR8              |
| 3. 43787E-26 | 0. 45440874  | 0. 124159404 | 0. 952631 | 0. 10872  | -0. 44275 | GGA1              |
| 3. 57318E-26 | 0. 067793298 | 0. 868996053 | -1. 11541 | 0. 256884 | 0. 130492 | ATP23             |
| 4. 57157E-26 | 0. 253536732 | 0. 764340274 | -0. 65425 | 0. 104733 | 0. 107085 | ERG4              |
| 4. 98278E-26 | 0. 094724157 | 0. 720195138 | -0. 70896 | 0. 154014 | 0. 1305   | GTT1              |

|              |              |              |           |           |           |                   |
|--------------|--------------|--------------|-----------|-----------|-----------|-------------------|
| 5. 21184E-26 | 0. 01494163  | 0. 689558052 | -1. 00527 | 0. 297646 | -0. 20018 | ECM4              |
| 6. 73563E-26 | 0. 783235602 | 1            | 0. 549233 | 0. 028245 | 0. 009072 | PGI1              |
| 8. 66875E-26 | 5. 40673E-06 | 1            | -0. 643   | 0. 315378 | -0. 01827 | YMR196W           |
| 1. 07183E-25 | 0. 824878272 | 0. 812668751 | 0. 57699  | 0. 025926 | -0. 08393 | SCL1              |
| 1. 35541E-25 | 0. 482993634 | 0. 000560624 | -0. 63347 | -0. 06836 | -0. 54185 | SER3              |
| 1. 73709E-25 | 0. 541155731 | 0. 669483248 | 0. 74735  | -0. 07332 | -0. 15846 | AIM21             |
| 1. 77209E-25 | 0. 427585494 | 0. 938683904 | 0. 666995 | 0. 080876 | 0. 053984 | SSA2              |
| 2. 01523E-25 | 0. 346709681 | 1            | 0. 841656 | -0. 11902 | -0. 01122 | YPR174C           |
| 2. 07568E-25 | 0. 799128108 | 0. 255041627 | 1. 054729 | 0. 052359 | -0. 40833 | YGR127W           |
| 2. 86973E-25 | 1            | 0. 032675489 | 0. 716566 | -0. 00545 | -0. 43577 | RAD52             |
| 2. 88085E-25 | 0. 677097244 | 0. 114153044 | 0. 568811 | 0. 041299 | 0. 276502 | RPS4A             |
| 2. 92012E-25 | 2. 0891E-19  | 1. 79499E-06 | 0. 737194 | -0. 67922 | 0. 819337 | PDR12             |
| 3. 89547E-25 | 1            | 0. 946767444 | 2. 118238 | -0. 01277 | 0. 173103 | COS3              |
| 4. 67484E-25 | 0. 552705567 | 0. 202387133 | -1. 0143  | 0. 095963 | 0. 4231   | KTI11             |
| 6. 49925E-25 | 0. 005890111 | 0. 983661882 | -1. 24355 | 0. 414557 | 0. 070368 | YDR381C- <i>l</i> |
| 7. 30252E-25 | 0. 267599743 | 0. 385959394 | -2. 79438 | 0. 394868 | -1. 06286 | YCL048W- <i>l</i> |
| 7. 3047E-25  | 0. 51846587  | 0. 595381214 | 2. 686576 | -0. 27073 | 0. 715716 | YPR078C           |
| 7. 40093E-25 | 0. 067354761 | 0. 043168161 | -0. 56095 | 0. 134615 | 0. 327837 | COR1              |
| 7. 84055E-25 | 0. 98811108  | 0. 427445927 | -0. 9737  | -0. 01165 | 0. 303151 | MSS1              |
| 8. 74598E-25 | 0. 914594311 | 0. 930835922 | 0. 618317 | -0. 01728 | 0. 053873 | PCM1              |
| 9. 6175E-25  | 0. 0122332   | 0. 004646745 | 0. 594579 | -0. 19099 | -0. 45129 | BI02              |
| 1. 38838E-24 | 0. 864526529 | 0. 056128421 | 0. 770602 | 0. 029696 | -0. 43212 | UBX5              |
| 1. 51249E-24 | 0. 102673469 | 0. 69956533  | 0. 80684  | 0. 179899 | -0. 164   | PSK1              |
| 1. 78077E-24 | 0. 148485947 | 0. 008483052 | 0. 664441 | -0. 13466 | -0. 48204 | VHS2              |
| 1. 78077E-24 | 1            | 0. 837234982 | -0. 71632 | -0. 00279 | 0. 098761 | GTT3              |
| 1. 93145E-24 | 0. 31098292  | 0. 853367097 | 1. 081033 | -0. 16513 | 0. 141463 | STP4              |
| 2. 1024E-24  | 0. 320262782 | 0. 58876642  | -2. 06216 | -0. 29556 | -0. 52264 | ASG7              |
| 2. 39838E-24 | 0. 024098511 | 0. 404345893 | 0. 771405 | 0. 227504 | -0. 2487  | PEP12             |
| 2. 55442E-24 | 0. 623266105 | 0. 711247098 | -0. 91738 | -0. 07649 | 0. 180677 | YPR071W           |
| 2. 78271E-24 | 0. 232185134 | 0. 44250063  | 0. 528521 | -0. 09206 | 0. 163299 | SCW10             |
| 3. 39197E-24 | 0. 670263285 | 0. 737474906 | -0. 74431 | 0. 055363 | 0. 135335 | DUR1, 2           |
| 3. 4012E-24  | 0. 000278456 | 0. 117748886 | -0. 58279 | 0. 248192 | 0. 284765 | ATP4              |
| 4. 82633E-24 | 0. 585440433 | 0. 798608504 | 0. 922829 | 0. 085855 | -0. 14473 | MMM1              |
| 6. 74661E-24 | 0. 712618958 | 0. 689558052 | 1. 077236 | -0. 0742  | -0. 22714 | LUC7              |
| 8. 02802E-24 | 0. 769795979 | 0. 781154036 | -0. 71965 | -0. 04004 | 0. 117762 | RPS9A             |
| 9. 23374E-24 | 0. 816009058 | 0. 57834141  | 0. 670958 | 0. 032346 | -0. 17177 | PRE1              |
| 1. 27086E-23 | 0. 011964436 | 0. 625394004 | -0. 68682 | -0. 22358 | -0. 16247 | RRM3              |
| 1. 29781E-23 | 0. 754750696 | 1            | 3. 095821 | 0. 172224 | -0. 16839 | YOR387C           |
| 1. 72629E-23 | 0. 746350726 | 0. 056128421 | -0. 52253 | -0. 03237 | 0. 299345 | HMT1              |
| 1. 72884E-23 | 0. 78296105  | 0. 530625906 | 0. 637767 | -0. 03468 | -0. 17702 | DOA1              |
| 1. 73877E-23 | 0. 003719396 | 0. 853162234 | -1. 46851 | 0. 521924 | -0. 19494 | DAL2              |
| 1. 9846E-23  | 8. 21754E-10 | 0. 020319939 | 0. 598442 | 0. 402799 | -0. 40256 | CIT1              |
| 2. 03856E-23 | 0. 568538677 | 0. 573905565 | -1. 3399  | 0. 126382 | -0. 34486 | YHR180W           |
| 2. 04105E-23 | 8. 28909E-06 | 1. 11734E-07 | -0. 71005 | -0. 36243 | -0. 87318 | MET17             |
| 2. 16782E-23 | 0. 596380201 | 0. 69956533  | 1. 716461 | 0. 158853 | -0. 36111 | YCR099C           |
| 2. 50031E-23 | 0. 767459399 | 0. 135324685 | 0. 697222 | -0. 0403  | -0. 33889 | MPE1              |
| 2. 51677E-23 | 0. 87366229  | 1            | 0. 703488 | -0. 02672 | 0. 008842 | SNU71             |
| 2. 89599E-23 | 0. 16612431  | 0. 021354889 | 0. 504339 | -0. 1009  | -0. 33874 | GLN1              |
| 3. 78096E-23 | 0. 250933629 | 0. 927365945 | 0. 828851 | -0. 14432 | -0. 07762 | GCR1              |
| 5. 8578E-23  | 0. 004542745 | 0. 50705979  | -0. 85753 | 0. 308085 | 0. 245745 | PET9              |
| 5. 98143E-23 | 0. 000483252 | 0. 035718466 | -0. 72666 | 0. 30747  | 0. 455425 | MRPS12            |
| 6. 42409E-23 | 0. 044769919 | 0. 706171263 | 0. 755298 | -0. 20785 | 0. 156745 | CDC19             |
| 6. 49119E-23 | 0. 001052654 | 0. 054756353 | -0. 68769 | 0. 277773 | 0. 399622 | COX9              |
| 6. 55517E-23 | 0. 31098292  | 0. 871227843 | 0. 820761 | -0. 12979 | 0. 10315  | TAH18             |

|              |              |              |           |           |           |           |
|--------------|--------------|--------------|-----------|-----------|-----------|-----------|
| 6. 64487E-23 | 0. 528966778 | 0. 771481707 | 0. 694059 | 0. 07326  | 0. 120501 | TPI1      |
| 6. 78862E-23 | 0. 667005173 | 0. 990208543 | -0. 98202 | 0. 075431 | 0. 054204 | TAZ1      |
| 6. 82875E-23 | 0. 295461185 | 0. 46824606  | 0. 549599 | -0. 08921 | -0. 16899 | RPT2      |
| 9. 19522E-23 | 0. 843151545 | 0. 132346701 | -0. 65589 | 0. 028342 | -0. 32083 | PDR16     |
| 1. 33784E-22 | 1            | 0. 702041373 | 0. 752858 | -0. 00601 | -0. 15873 | AVT3      |
| 1. 3989E-22  | 0. 298712865 | 0. 000241139 | 0. 977278 | -0. 15999 | -0. 93702 | RNR3      |
| 1. 49995E-22 | 0. 436108065 | 0. 235733788 | -1. 12371 | -0. 14004 | -0. 46848 | YPC1      |
| 1. 70869E-22 | 0. 89418929  | 0. 368515913 | -0. 69423 | 0. 023078 | 0. 242623 | SOD1      |
| 1. 8483E-22  | 0. 759694936 | 0. 771481707 | -1. 05959 | 0. 062965 | 0. 182121 | RFU1      |
| 1. 94868E-22 | 0. 940875632 | 0. 768691181 | 0. 523115 | 0. 01232  | -0. 09248 | RPN2      |
| 2. 02796E-22 | 0. 384508616 | 0. 100874715 | 3. 590254 | 0. 42751  | -2. 81177 | None      |
| 2. 08205E-22 | 0. 934155569 | 0. 697639077 | -1. 12172 | -0. 02791 | -0. 23877 | YOR389W   |
| 2. 13461E-22 | 0. 835487572 | 0. 75114195  | 0. 785116 | 0. 036249 | -0. 1443  | SDS22     |
| 2. 33085E-22 | 0. 435407492 | 1            | -0. 60666 | -0. 07686 | 0. 016737 | PAN6      |
| 2. 59523E-22 | 0. 799456203 | 0. 492130336 | -5. 3712  | 0. 186838 | -2. 87657 | YHR125W   |
| 3. 83439E-22 | 0. 030776241 | 0. 599665071 | -0. 80652 | 0. 235496 | 0. 205374 | RCF1      |
| 4. 0623E-22  | 0. 121546688 | 0. 584277027 | -1. 59703 | 0. 345607 | -0. 4174  | NDE2      |
| 4. 18821E-22 | 0. 402684486 | 0. 983370642 | 0. 850467 | -0. 11669 | -0. 05238 | SHE4      |
| 4. 75403E-22 | 0. 333037056 | 0. 930420244 | -1. 48296 | -0. 22328 | -0. 13563 | YIL166C   |
| 6. 05072E-22 | 6. 61603E-07 | 0. 822329423 | 0. 608187 | 0. 353959 | 0. 093299 | MSC1      |
| 6. 81531E-22 | 0. 690335313 | 0. 990712634 | -0. 67414 | 0. 050293 | 0. 037719 | HTA1      |
| 7. 76988E-22 | 0. 079856981 | 0. 060772124 | 0. 698513 | 0. 176175 | -0. 40953 | YMR181C   |
| 8. 0871E-22  | 0. 385272897 | 0. 099020366 | 0. 744374 | 0. 105891 | -0. 39968 | FMS1      |
| 8. 16854E-22 | 0. 000138851 | 0. 628060129 | -0. 81102 | 0. 37567  | 0. 197941 | HOR7      |
| 8. 45188E-22 | 1            | 0. 712529354 | 1. 311653 | 0. 002125 | 0. 27376  | FEX1      |
| 8. 95481E-22 | 0. 663252335 | 0. 715570823 | 0. 548598 | -0. 04486 | -0. 11298 | RPT4      |
| 9. 02237E-22 | 0. 156630548 | 0. 847404354 | -1. 11155 | 0. 228368 | 0. 156439 | YDR286C   |
| 1. 32847E-21 | 0. 956605945 | 0. 705630037 | 0. 743546 | -0. 01534 | -0. 15897 | YGL036W   |
| 1. 71982E-21 | 0. 892842541 | 0. 545272974 | -4. 66846 | 0. 11726  | 1. 848102 | None      |
| 1. 77037E-21 | 0. 582123297 | 0. 022570781 | -0. 81586 | 0. 079368 | 0. 561221 | PMP2      |
| 1. 99237E-21 | 0. 305193244 | 1            | 0. 680278 | -0. 11208 | -0. 03557 | TFG1      |
| 2. 20452E-21 | 0. 514232347 | 1            | -0. 59643 | 0. 066436 | -0. 01065 | WHI2      |
| 2. 21839E-21 | 0. 215871633 | 0. 388478515 | 0. 518278 | -0. 09918 | -0. 18267 | RPT3      |
| 2. 39664E-21 | 0. 026560847 | 1            | -1. 64426 | 0. 489004 | 0. 049641 | YDR461C-1 |
| 2. 53114E-21 | 0. 733704736 | 0. 842612183 | -0. 84591 | -0. 05682 | -0. 12299 | PRP31     |
| 2. 6209E-21  | 0. 633340819 | 0. 00166885  | -0. 60581 | -0. 05313 | -0. 52751 | ALD6      |
| 2. 77325E-21 | 0. 023687856 | 0. 318881364 | -0. 73826 | -0. 23102 | 0. 284809 | GPX2      |
| 2. 80115E-21 | 0. 775390182 | 1            | -0. 76259 | -0. 04412 | -0. 01434 | NPY1      |
| 2. 94482E-21 | 0. 059742746 | 1            | 0. 897432 | -0. 24308 | -0. 00984 | SOK2      |
| 3. 3285E-21  | 0. 363817999 | 0. 119718988 | 0. 674551 | -0. 10182 | -0. 35445 | LSB1      |
| 3. 76383E-21 | 0. 968013408 | 0. 031200361 | -0. 57023 | 0. 010462 | 0. 380737 | RPL9B     |
| 3. 80303E-21 | 0. 72655191  | 0. 808567391 | -0. 77964 | -0. 05389 | 0. 125557 | EAR1      |
| 3. 85143E-21 | 0. 186602961 | 1            | -0. 70789 | 0. 140916 | -0. 01893 | DMA1      |
| 4. 09679E-21 | 0. 36891213  | 0. 94082376  | 1. 845118 | -0. 27823 | -0. 16403 | YJR154W   |
| 4. 69678E-21 | 0. 265919992 | 0. 35208106  | -1. 26852 | 0. 219619 | -0. 4635  | YOR338W   |
| 4. 78772E-21 | 0. 497819776 | 0. 964236348 | -0. 59808 | 0. 069268 | 0. 045777 | YIM1      |
| 4. 80488E-21 | 0. 98685381  | 0. 23260457  | -0. 73866 | -0. 00996 | -0. 32443 | RAD57     |
| 4. 80579E-21 | 0. 052367663 | 0. 890182184 | 0. 580564 | -0. 16245 | 0. 070251 | CLN2      |
| 6. 63166E-21 | 0. 753511485 | 0. 546473621 | 0. 579429 | -0. 03763 | 0. 167005 | RSN1      |
| 7. 26334E-21 | 0. 607278799 | 0. 049893598 | 0. 585833 | -0. 05599 | 0. 369221 | SRL1      |
| 8. 0676E-21  | 0. 134575272 | 0. 139610149 | -0. 84157 | 0. 186537 | -0. 42772 | ERS1      |
| 8. 73595E-21 | 0. 98474138  | 0. 955327449 | -3. 28363 | -0. 03806 | -0. 34707 | None      |
| 9. 13784E-21 | 0. 985451395 | 0. 91703897  | -0. 82438 | 0. 011684 | 0. 086367 | FEN2      |
| 1. 02467E-20 | 0. 402148664 | 1            | -0. 63798 | -0. 08908 | -0. 02175 | ERG27     |

|              |              |              |           |           |           |         |
|--------------|--------------|--------------|-----------|-----------|-----------|---------|
| 1. 08771E-20 | 0. 15351117  | 0. 810575835 | -1. 29828 | 0. 274037 | 0. 211298 | CSI1    |
| 1. 08999E-20 | 0. 979904046 | 0. 933146024 | 0. 515    | -0. 0082  | -0. 04804 | CDC48   |
| 1. 23556E-20 | 0. 169066016 | 1            | 0. 723848 | -0. 15405 | -0. 03652 | BUD13   |
| 1. 55794E-20 | 0. 006930015 | 0. 077555297 | 1. 421075 | 0. 532398 | -0. 83714 | LEE1    |
| 1. 56759E-20 | 1            | 0. 726816534 | 0. 767408 | 0. 000152 | -0. 1579  | NUR1    |
| 1. 63161E-20 | 0. 849454954 | 0. 341891426 | -0. 78342 | 0. 034795 | 0. 297229 | MIX23   |
| 1. 70223E-20 | 0. 297563912 | 1            | 0. 91523  | 0. 156632 | 0. 0097   | SOL1    |
| 1. 7967E-20  | 0. 887204289 | 0. 403591361 | 1. 006145 | 0. 037696 | -0. 35583 | PTP2    |
| 1. 93727E-20 | 0. 00609714  | 0. 931568877 | -0. 83476 | 0. 310924 | -0. 07777 | RSM7    |
| 2. 44348E-20 | 0. 836107259 | 1            | -0. 63954 | -0. 03049 | 0. 015705 | CPT1    |
| 2. 80825E-20 | 0. 009421675 | 1            | -0. 6753  | 0. 243203 | -0. 03607 | MIC27   |
| 3. 07864E-20 | 0. 37200931  | 0. 856109565 | 1. 027953 | -0. 15674 | 0. 147096 | RGM1    |
| 4. 78145E-20 | 0. 663621022 | 0. 384202197 | 2. 038868 | -0. 17541 | -0. 74837 | DAK2    |
| 5. 14823E-20 | 0. 440243906 | 0. 69956533  | -0. 5244  | 0. 069679 | 0. 11739  | POR1    |
| 5. 90477E-20 | 0. 463310994 | 1            | -0. 57679 | -0. 07358 | -0. 01171 | HHT1    |
| 6. 26164E-20 | 1. 9093E-08  | 0. 224875404 | 0. 633259 | 0. 429478 | 0. 291792 | SOL4    |
| 7. 75261E-20 | 0. 413532829 | 0. 550781538 | -0. 82345 | 0. 114326 | 0. 239958 | BOL3    |
| 8. 19653E-20 | 1            | 0. 27811547  | -0. 53259 | -0. 00452 | 0. 226604 | PPT1    |
| 8. 25453E-20 | 0. 734964949 | 0. 373398241 | 0. 650296 | 0. 04595  | -0. 24335 | YNL208W |
| 9. 16093E-20 | 0. 53992737  | 0. 032675489 | 0. 782041 | 0. 087708 | -0. 53937 | HSV2    |
| 1. 03254E-19 | 0. 164194878 | 0. 711421266 | 0. 759279 | 0. 165968 | -0. 16731 | PUN1    |
| 1. 06022E-19 | 0. 404471627 | 0. 36347688  | -2. 99025 | 0. 3748   | -1. 34038 | YOL085C |
| 1. 18817E-19 | 4. 35944E-07 | 0. 385959394 | -0. 60514 | 0. 373389 | 0. 221524 | GAD1    |
| 1. 24395E-19 | 0. 013475412 | 0. 403591361 | 1. 388173 | 0. 494439 | -0. 50101 | YAR023C |
| 1. 61294E-19 | 0. 004691149 | 0. 90453709  | -0. 86641 | 0. 337927 | -0. 1011  | YIL077C |
| 1. 83999E-19 | 0. 040760459 | 0. 539379949 | 0. 857161 | 0. 260864 | -0. 25811 | YOR385W |
| 1. 92332E-19 | 0. 487247805 | 0. 313527933 | -0. 56221 | -0. 06938 | 0. 229068 | NSA2    |
| 1. 9802E-19  | 0. 790107901 | 0. 914989908 | -0. 67418 | -0. 03889 | -0. 07433 | ERG12   |
| 1. 98329E-19 | 0. 340662441 | 0. 893360707 | -0. 66821 | 0. 107576 | -0. 08243 | YKR070W |
| 1. 99705E-19 | 0. 062448847 | 0. 92745323  | -0. 6763  | 0. 186736 | 0. 068632 | DOT5    |
| 2. 09834E-19 | 0. 235853165 | 0. 313687377 | 1. 041065 | -0. 20385 | -0. 42625 | NRT1    |
| 2. 10899E-19 | 1. 27641E-09 | 0. 000885507 | 0. 96031  | 0. 706272 | -0. 92048 | YJR115W |
| 2. 16376E-19 | 0. 00097274  | 0. 276169893 | -0. 69739 | 0. 3089   | 0. 29922  | RDL1    |
| 2. 22493E-19 | 0. 853333651 | 0. 699858425 | 0. 696605 | -0. 03204 | -0. 15977 | MSB4    |
| 2. 31515E-19 | 0. 714551955 | 1            | -0. 71628 | 0. 05352  | -0. 0257  | YPL068C |
| 2. 5337E-19  | 0. 446288659 | 1            | 0. 871276 | 0. 117884 | 0. 045245 | COS9    |
| 2. 55229E-19 | 0. 321761523 | 0. 688473731 | -0. 63968 | -0. 10699 | -0. 14987 | YLR407W |
| 2. 84714E-19 | 0. 891627765 | 0. 055048108 | 0. 54548  | 0. 020379 | -0. 34893 | CUP9    |
| 4. 05803E-19 | 0. 024386386 | 0. 846570403 | 1. 194537 | -0. 40458 | -0. 1872  | IME2    |
| 4. 08912E-19 | 0. 885372644 | 0. 631857671 | 0. 500763 | -0. 01969 | -0. 13199 | RPN6    |
| 4. 65529E-19 | 0. 137864205 | 0. 16733912  | 0. 925436 | 0. 218097 | -0. 47395 | MTH1    |
| 4. 74856E-19 | 0. 237237286 | 0. 818523526 | 1. 626141 | 0. 317979 | 0. 277322 | None    |
| 4. 88913E-19 | 0. 529464272 | 1            | -0. 90752 | -0. 10375 | 0. 023722 | JLP2    |
| 5. 17114E-19 | 0. 462711274 | 0. 493450262 | 0. 988653 | 0. 131423 | 0. 323539 | LIF1    |
| 5. 40519E-19 | 0. 098340256 | 0. 179756965 | -0. 60395 | 0. 153351 | 0. 302587 | ATP17   |
| 5. 48534E-19 | 0. 581221243 | 1            | 3. 269033 | -0. 34579 | -0. 19105 | YCR101C |
| 6. 28834E-19 | 0. 662458676 | 0. 888371569 | -0. 75331 | 0. 065327 | 0. 096749 | TIM21   |
| 6. 34562E-19 | 0. 836107259 | 1            | 0. 743457 | -0. 03739 | 0. 015805 | VPS9    |
| 6. 69808E-19 | 0. 46143745  | 0. 87592683  | 0. 829918 | -0. 11099 | -0. 11254 | ECM29   |
| 6. 86153E-19 | 0. 107981181 | 0. 004134287 | -0. 71866 | -0. 17911 | 0. 629561 | AGA1    |
| 7. 09198E-19 | 0. 290286754 | 0. 889649609 | 0. 9641   | -0. 1759  | -0. 12371 | PFK26   |
| 7. 96083E-19 | 0. 672577856 | 0. 2432512   | -1. 00348 | 0. 084098 | 0. 459268 | TCA17   |
| 8. 69956E-19 | 0. 979039665 | 0. 809711663 | 3. 044639 | 0. 047049 | -0. 60742 | None    |
| 8. 72057E-19 | 0. 649028901 | 0. 598759914 | 0. 485724 | -0. 04451 | -0. 1364  | LYS12   |

|              |              |              |           |           |           |           |
|--------------|--------------|--------------|-----------|-----------|-----------|-----------|
| 9. 05971E-19 | 0. 051638227 | 0. 385959394 | -0. 5202  | 0. 152401 | 0. 195794 | QCR2      |
| 1. 00293E-18 | 0. 83092898  | 0. 063075209 | 0. 653747 | 0. 033757 | -0. 41263 | NPL4      |
| 1. 01889E-18 | 0. 97733147  | 0. 35748349  | -1. 46812 | 0. 024911 | -0. 57783 | AAD14     |
| 1. 01889E-18 | 0. 66730791  | 0. 949031652 | -1. 51016 | 0. 126913 | 0. 134518 | SHU2      |
| 1. 10735E-18 | 0. 041753901 | 1            | 0. 609262 | 0. 188085 | 0. 032854 | ILV6      |
| 1. 10942E-18 | 0. 001315508 | 0. 41145986  | 1. 232444 | 0. 555225 | 0. 454591 | HXT1      |
| 1. 2262E-18  | 7. 17105E-05 | 0. 063185034 | -0. 54533 | 0. 285252 | 0. 343326 | ATP5      |
| 1. 24292E-18 | 0. 813026602 | 0. 241434728 | 0. 580277 | -0. 03219 | -0. 27005 | SSL1      |
| 1. 49311E-18 | 0. 885106299 | 0. 623756562 | -1. 4145  | 0. 054814 | 0. 383075 | BNS1      |
| 1. 54744E-18 | 0. 877996534 | 0. 744376434 | -0. 6565  | 0. 027138 | -0. 13478 | AEP2      |
| 1. 58405E-18 | 0. 616558301 | 0. 648751155 | -0. 61203 | 0. 059949 | 0. 158001 | HHF1      |
| 2. 01993E-18 | 0. 525275245 | 0. 937179795 | 0. 490132 | -0. 05857 | -0. 04763 | RPT6      |
| 2. 09109E-18 | 0. 157263376 | 0. 340307283 | 0. 642403 | -0. 14833 | 0. 261736 | MRX12     |
| 2. 156E-18   | 0. 885106299 | 0. 742563863 | 0. 517978 | 0. 020857 | -0. 10825 | PRE5      |
| 2. 17462E-18 | 0. 338017134 | 0. 210048952 | 0. 674651 | 0. 114329 | -0. 33047 | IML2      |
| 2. 48635E-18 | 0. 374954065 | 0. 163898132 | 0. 634322 | -0. 10096 | 0. 336971 | HXT3      |
| 2. 69695E-18 | 0. 940898947 | 0. 50705979  | -0. 71169 | 0. 018355 | 0. 231368 | RPC25     |
| 3. 00568E-18 | 0. 007771785 | 0. 919271701 | -3. 42449 | -1. 15337 | -0. 47117 | YPR108W-I |
| 3. 07361E-18 | 0. 227774912 | 0. 614405454 | -1. 37366 | 0. 27079  | -0. 38055 | PHO11     |
| 3. 13242E-18 | 0. 272944905 | 0. 647883595 | -1. 07134 | 0. 198111 | 0. 280846 | MGT1      |
| 3. 21477E-18 | 0. 936093775 | 0. 637177071 | -0. 91301 | 0. 02485  | -0. 24038 | GCV1      |
| 3. 56217E-18 | 0. 398255447 | 0. 180992827 | 0. 477741 | -0. 07299 | -0. 24614 | SHP1      |
| 3. 77377E-18 | 0. 697408284 | 0. 489219563 | -0. 64839 | 0. 052445 | 0. 2162   | YDR524W-C |
| 4. 10068E-18 | 0. 814509078 | 0. 785906893 | -0. 61315 | 0. 033787 | -0. 11515 | SEN2      |
| 4. 29128E-18 | 0. 687268707 | 0. 975984512 | -2. 60981 | 0. 200176 | 0. 205201 | YIG1      |
| 4. 68116E-18 | 2. 26709E-17 | 0. 001009254 | 0. 662274 | 0. 67776  | -0. 65543 | TSL1      |
| 4. 87767E-18 | 0. 910686173 | 0. 068733809 | 0. 869849 | 0. 029638 | -0. 55074 | DIC1      |
| 5. 21401E-18 | 0. 622910776 | 0. 97458978  | 0. 524027 | 0. 05207  | 0. 039701 | ADH3      |
| 5. 41148E-18 | 0. 887439198 | 0. 179756965 | 1. 298267 | -0. 05233 | -0. 67759 | YML083C   |
| 5. 4879E-18  | 3. 15242E-05 | 0. 040245891 | -0. 81054 | 0. 445399 | 0. 568072 | MRPL33    |
| 5. 66584E-18 | 0. 663460514 | 0. 55065098  | -0. 6172  | 0. 054994 | 0. 190109 | GNA1      |
| 6. 08062E-18 | 0. 343957891 | 0. 784759141 | -0. 45207 | -0. 07594 | 0. 085546 | VMA1      |
| 6. 62388E-18 | 0. 058697807 | 0. 600468279 | -0. 44028 | 0. 129256 | -0. 12522 | PIL1      |
| 6. 69408E-18 | 0. 863721096 | 0. 712488585 | -0. 60865 | 0. 02736  | -0. 13909 | OPI3      |
| 8. 64521E-18 | 0. 412595975 | 1            | -0. 5966  | 0. 088544 | 0. 022038 | RPB7      |
| 8. 90797E-18 | 0. 999036524 | 0. 261124045 | -0. 67339 | -0. 00738 | -0. 30785 | DUG3      |
| 9. 10465E-18 | 0. 427585494 | 0. 000344374 | -0. 97451 | 0. 139721 | -1. 04022 | FAT3      |
| 9. 41591E-18 | 0. 040742569 | 0. 725989422 | -0. 84253 | 0. 263335 | 0. 185652 | PAI3      |
| 9. 82326E-18 | 0. 007154715 | 0. 438570787 | 1. 13279  | 0. 45745  | 0. 415149 | SDD1      |
| 1. 08663E-17 | 0. 019255559 | 0. 27982387  | 0. 567011 | -0. 20469 | -0. 25653 | MET22     |
| 1. 13188E-17 | 0. 0122332   | 0. 28514767  | -0. 66604 | 0. 249598 | 0. 295472 | MIR1      |
| 1. 19256E-17 | 0. 897246027 | 0. 89043028  | -0. 51427 | -0. 01912 | -0. 06737 | TSC10     |
| 1. 23108E-17 | 0. 499874449 | 0. 288830675 | 0. 820436 | 0. 105476 | -0. 36436 | GID8      |
| 1. 23962E-17 | 0. 55262733  | 0. 733663876 | 0. 814852 | -0. 09502 | 0. 179124 | HSP31     |
| 1. 27516E-17 | 0. 04568163  | 0. 058656331 | -0. 6473  | -0. 20137 | 0. 426709 | SAP185    |
| 1. 52345E-17 | 0. 527119409 | 0. 38020077  | -0. 61185 | 0. 073669 | 0. 240681 | IES3      |
| 1. 56107E-17 | 0. 011900388 | 0. 007546041 | -0. 83337 | 0. 314509 | 0. 720836 | ATP19     |
| 1. 60566E-17 | 0. 639535568 | 0. 438612707 | -0. 55457 | 0. 053139 | 0. 2023   | YDR524C-I |
| 1. 63639E-17 | 0. 127610291 | 0. 368395884 | 1. 454303 | 0. 364874 | -0. 58113 | MAG1      |
| 1. 7224E-17  | 0. 152125016 | 0. 62830703  | -0. 87605 | 0. 204859 | -0. 24251 | EDS1      |
| 1. 91053E-17 | 0. 834779949 | 0. 804181925 | -0. 87156 | -0. 04515 | -0. 15732 | SR09      |
| 1. 95887E-17 | 0. 080143076 | 0. 392148505 | 0. 7685   | 0. 218055 | 0. 300874 | INM2      |
| 2. 3441E-17  | 0. 842054391 | 0. 909621954 | 0. 521797 | 0. 026632 | -0. 06322 | TPD3      |
| 2. 37941E-17 | 0. 968967353 | 0. 782726705 | 0. 598024 | -0. 0122  | -0. 11637 | TGL1      |

|              |              |              |           |           |           |           |
|--------------|--------------|--------------|-----------|-----------|-----------|-----------|
| 2. 44696E-17 | 0. 118813668 | 8. 86376E-05 | 0. 538218 | -0. 13939 | -0. 62259 | ARG4      |
| 2. 47026E-17 | 0. 969492509 | 0. 051669961 | 0. 804276 | -0. 01633 | -0. 55056 | SKM1      |
| 2. 47913E-17 | 0. 413532829 | 0. 976378097 | 0. 770782 | 0. 11736  | -0. 05843 | YAR028W   |
| 2. 65796E-17 | 0. 011575654 | 0. 659038749 | 0. 496053 | 0. 192797 | 0. 132315 | BAT2      |
| 2. 69938E-17 | 0. 025415054 | 0. 488692236 | -0. 8828  | 0. 302309 | -0. 30086 | PDR15     |
| 2. 774E-17   | 0. 554757324 | 0. 524992421 | -1. 06903 | 0. 122333 | -0. 34526 | COQ2      |
| 2. 93628E-17 | 0. 001445517 | 0. 136710348 | -0. 53812 | 0. 247714 | 0. 304259 | MRPL11    |
| 3. 05434E-17 | 0. 589760072 | 0. 321715999 | 0. 671565 | -0. 07386 | -0. 29004 | FAR8      |
| 3. 07404E-17 | 0. 909821229 | 0. 043873822 | -0. 5784  | 0. 02003  | -0. 40552 | ADI1      |
| 3. 23891E-17 | 0. 155051744 | 0. 032675489 | -0. 70921 | 0. 167256 | -0. 52024 | SSA3      |
| 3. 24402E-17 | 0. 018000801 | 0. 29383174  | -0. 75936 | -0. 27621 | -0. 33537 | MNN4      |
| 3. 25368E-17 | 0. 063687056 | 0. 648898447 | 0. 528898 | -0. 15807 | 0. 143638 | SAC1      |
| 3. 32275E-17 | 0. 382143759 | 0. 919926509 | -0. 66676 | 0. 106551 | -0. 07587 | TAF13     |
| 3. 36555E-17 | 0. 96027393  | 0. 223381301 | -0. 75502 | -0. 01666 | 0. 373716 | YML108W   |
| 3. 74652E-17 | 0. 055084413 | 0. 711247098 | 0. 753258 | -0. 23243 | 0. 179704 | CHS1      |
| 4. 02473E-17 | 0. 199012093 | 0. 690551186 | 1. 626261 | -0. 36532 | -0. 4106  | YIR014W   |
| 4. 77586E-17 | 0. 003630141 | 0. 081519515 | -0. 60966 | 0. 26324  | 0. 38401  | MRPL20    |
| 4. 80295E-17 | 0. 008969822 | 1            | -0. 55937 | -0. 22367 | 0. 012878 | EFM1      |
| 5. 16161E-17 | 1            | 0. 229037932 | -0. 80853 | -0. 0046  | -0. 39833 | GAT1      |
| 5. 25897E-17 | 0. 41585352  | 0. 449106932 | -0. 50478 | 0. 076232 | -0. 18409 | NSG2      |
| 5. 25897E-17 | 0. 358333717 | 0. 997024491 | 0. 875687 | -0. 14965 | 0. 05325  | RSF2      |
| 5. 26519E-17 | 8. 2412E-08  | 0. 064361732 | -0. 77171 | 0. 536923 | 0. 508228 | YOR289W   |
| 5. 45024E-17 | 0. 037345625 | 0. 92578246  | 0. 719731 | -0. 24014 | 0. 080236 | SIP1      |
| 5. 74203E-17 | 0. 529154357 | 0. 937363635 | 0. 668442 | -0. 08294 | -0. 06755 | ROT2      |
| 5. 7588E-17  | 0. 509499029 | 0. 967394603 | 4. 485026 | 0. 438228 | -0. 43038 | None      |
| 5. 78928E-17 | 0. 652939653 | 0. 088859612 | -1. 46159 | 0. 135023 | -0. 9141  | ECM13     |
| 6. 22853E-17 | 5. 31206E-10 | 1            | 0. 498058 | 0. 401184 | 0. 01324  | GLK1      |
| 6. 44498E-17 | 0. 843256522 | 0. 886876142 | -0. 58856 | -0. 02978 | 0. 081314 | RSA1      |
| 6. 80473E-17 | 0. 642716671 | 0. 962684605 | 0. 76284  | 0. 074879 | -0. 06648 | RP041     |
| 7. 5051E-17  | 4. 7614E-06  | 0. 254952703 | -0. 94042 | 0. 574194 | -0. 4459  | TPK1      |
| 7. 5056E-17  | 0. 637757348 | 0. 312925981 | -1. 02189 | 0. 099426 | -0. 44355 | YKL068W-1 |
| 9. 50914E-17 | 0. 43007847  | 0. 876200558 | 0. 504974 | -0. 07605 | 0. 072977 | PFK1      |
| 1. 12592E-16 | 0. 186363168 | 0. 688473731 | -0. 57908 | 0. 13109  | -0. 14653 | CPA1      |
| 1. 14301E-16 | 1            | 0. 323254295 | -0. 73363 | -0. 00537 | -0. 32018 | THI20     |
| 1. 22767E-16 | 0. 670717765 | 1            | 0. 472245 | 0. 043443 | -0. 01999 | SNF7      |
| 1. 43854E-16 | 0. 851320842 | 0. 411002948 | 0. 462154 | -0. 02322 | -0. 18107 | RPT5      |
| 1. 55439E-16 | 0. 03938265  | 0. 155227311 | 0. 554614 | 0. 184931 | -0. 31305 | ORM2      |
| 1. 72236E-16 | 0. 103941245 | 0. 845425423 | -1. 94609 | 0. 504363 | -0. 32253 | YAR068W   |
| 1. 75975E-16 | 0. 616539813 | 0. 086540485 | 0. 74132  | 0. 078638 | -0. 47153 | HUL5      |
| 1. 87067E-16 | 0. 8316826   | 0. 997335542 | 1. 833017 | -0. 1012  | -0. 1167  | None      |
| 1. 89718E-16 | 0. 953675948 | 0. 50705979  | 0. 496662 | -0. 01225 | -0. 17219 | STE4      |
| 1. 95734E-16 | 0. 761809122 | 0. 992021238 | 0. 565983 | 0. 040222 | -0. 03696 | BRO1      |
| 1. 98826E-16 | 0. 518133314 | 1            | 0. 548462 | 0. 070367 | -0. 0266  | ARC35     |
| 2. 00377E-16 | 0. 261791204 | 0. 616944383 | -0. 56287 | 0. 113626 | -0. 16343 | HFD1      |
| 2. 04484E-16 | 0. 102434008 | 0. 314344681 | -1. 05688 | 0. 283473 | 0. 470031 | MIX14     |
| 2. 0854E-16  | 0. 865084571 | 1            | 0. 461785 | -0. 02188 | 0. 021464 | PRO2      |
| 2. 14053E-16 | 0. 750533048 | 1            | -1. 86237 | 0. 131411 | -0. 10143 | MND1      |
| 2. 1643E-16  | 0. 887439198 | 0. 840006224 | 0. 675176 | -0. 02835 | 0. 11467  | BZZ1      |
| 2. 17751E-16 | 0. 795533688 | 0. 984748505 | 0. 482831 | -0. 0304  | -0. 0344  | RPN5      |
| 2. 20722E-16 | 0. 881859811 | 0. 992021238 | 1. 120096 | 0. 049554 | 0. 073838 | RMA1      |
| 2. 5065E-16  | 0. 412644964 | 0. 056128421 | -0. 46118 | -0. 07195 | 0. 32055  | LTV1      |
| 2. 68658E-16 | 0. 805302069 | 1            | 0. 73076  | 0. 044695 | 0. 02917  | MIF2      |
| 2. 84558E-16 | 0. 236477875 | 0. 940676267 | 0. 425104 | -0. 0908  | -0. 04306 | THR4      |
| 3. 07012E-16 | 0. 893574975 | 0. 61504221  | 2. 383414 | 0. 09548  | -0. 72826 | ENA2      |



|              |              |                                                              |
|--------------|--------------|--------------------------------------------------------------|
| 3. 19585E-16 | 0. 160949853 | 0. 017177219 -0. 57938 0. 139575 -0. 47934 UGA1              |
| 3. 6352E-16  | 0. 017770743 | 0. 744381844 -1. 36195 0. 49904 -0. 30262 SHC1               |
| 3. 84297E-16 | 0. 385471859 | 1 0. 442646 0. 073553 0. 002416 ASN2                         |
| 4. 27378E-16 | 0. 002352769 | 0. 593717896 -0. 51499 0. 237545 -0. 15664 MDG1              |
| 4. 42821E-16 | 0. 767459399 | 0. 049980756 -0. 54617 0. 037777 0. 39031 RLP24              |
| 4. 55716E-16 | 0. 000264138 | 0. 017177219 -1. 23913 0. 646957 -1. 00302 PUT4              |
| 4. 82381E-16 | 0. 248612302 | 0. 471735065 0. 591845 -0. 12543 -0. 21842 PBS2              |
| 5. 04583E-16 | 0. 87305028  | 0. 617460449 -0. 48547 0. 022205 -0. 14261 RH05              |
| 5. 11532E-16 | 0. 911657957 | 0. 975984512 0. 476745 -0. 01715 -0. 038 YPR1                |
| 5. 20676E-16 | 0. 018089723 | 1. 71379E-06 -0. 73756 -0. 27901 -1. 01805 GCV2              |
| 5. 22344E-16 | 0. 630857184 | 0. 785906893 0. 58498 -0. 06095 -0. 11818 MVP1               |
| 5. 24246E-16 | 0. 483640078 | 0. 558625562 0. 530876 0. 073996 0. 173302 SPE3              |
| 5. 27591E-16 | 0. 362927385 | 0. 125375403 1. 444897 0. 252345 -0. 86112 YBR201C- <i>l</i> |
| 5. 38354E-16 | 0. 001445517 | 0. 0420421 -0. 78586 0. 374493 0. 579272 ATP15               |
| 5. 53311E-16 | 0. 427585494 | 0. 373751943 -0. 5156 -0. 07919 0. 215389 RTT10              |
| 5. 76775E-16 | 1            | 0. 322647589 0. 813028 0. 00466 -0. 36597 YMR317W            |
| 5. 97709E-16 | 1            | 0. 26370665 0. 738476 -0. 00352 -0. 36016 SLM1               |
| 6. 34623E-16 | 6. 9967E-06  | 0. 546473621 0. 651164 -0. 4164 -0. 216 MAE1                 |
| 7. 24158E-16 | 0. 295461185 | 0. 737036218 0. 758244 -0. 14965 -0. 17417 JIP4              |
| 7. 39342E-16 | 0. 177522395 | 0. 133656507 -0. 55591 -0. 13161 0. 330441 DBP8              |
| 7. 57332E-16 | 0. 418025408 | 0. 950921142 0. 626979 -0. 09948 0. 061354 YNL058C           |
| 8. 3899E-16  | 0. 72085728  | 0. 75616091 0. 618145 -0. 05148 -0. 13534 CNA1               |
| 8. 81302E-16 | 0. 783246578 | 0. 755222158 0. 536743 0. 035839 -0. 11783 FLC1              |
| 9. 50485E-16 | 0. 217407387 | 0. 063736572 -0. 78937 0. 173562 0. 542251 MRX14             |
| 1. 02938E-15 | 0. 903919288 | 0. 818523526 -2. 43296 0. 081217 -0. 52169 None              |
| 1. 03014E-15 | 0. 003904221 | 0. 635840497 0. 714822 0. 325134 -0. 20718 XKS1              |
| 1. 1583E-15  | 0. 985451395 | 1 0. 552019 0. 009263 0. 032314 YLR179C                      |
| 1. 19161E-15 | 0. 004332188 | 0. 045957184 -0. 60175 0. 267441 0. 4431 MIC10               |
| 1. 20989E-15 | 8. 58497E-07 | 0. 847404354 -0. 6067 -0. 41703 -0. 1022 ISU2                |
| 1. 22892E-15 | 0. 518133314 | 1 -0. 53038 -0. 06921 -0. 02784 ARO1                         |
| 1. 31822E-15 | 0. 09134229  | 0. 702041373 0. 700388 -0. 20483 0. 179739 TAF12             |
| 1. 6369E-15  | 0. 111813466 | 0. 019048423 -0. 49539 -0. 13658 0. 417595 SPB1              |
| 1. 64713E-15 | 0. 782040669 | 1 -1. 10991 -0. 07365 -0. 02414 GRX8                         |
| 1. 6539E-15  | 0. 464405882 | 0. 411752857 0. 455617 -0. 06716 -0. 18461 PRE2              |
| 1. 69253E-15 | 0. 995096172 | 0. 186752472 -1. 96084 -0. 02465 -1. 23541 None              |
| 1. 72522E-15 | 0. 983426723 | 1 -0. 71428 -0. 01239 -0. 02685 TP01                         |
| 1. 88523E-15 | 0. 570094142 | 0. 869100567 0. 695323 -0. 08438 -0. 10857 INP52             |
| 2. 20564E-15 | 0. 293605247 | 1 -0. 72924 0. 144014 0. 01323 GPI15                         |
| 2. 26696E-15 | 0. 670089723 | 0. 742768539 0. 803123 -0. 07741 -0. 18439 PUT3              |
| 2. 42444E-15 | 1. 80782E-05 | 0. 90423793 -0. 56149 0. 345743 0. 074989 MRPS18             |
| 2. 44048E-15 | 0. 021955716 | 0. 878872633 0. 863986 0. 328922 -0. 12926 ALG13             |
| 2. 44501E-15 | 0. 702542191 | 0. 58793448 0. 464064 -0. 04116 0. 148038 PDI1               |
| 2. 44734E-15 | 0. 942240663 | 1 -1. 92007 0. 052069 -0. 11018 YGR039W                      |
| 2. 52301E-15 | 0. 644005887 | 1 -0. 45862 -0. 04679 0. 007037 SAH1                         |
| 2. 5961E-15  | 0. 720356067 | 0. 812812583 -0. 65389 -0. 05462 -0. 12412 SNF8              |
| 2. 68263E-15 | 8. 26747E-09 | 0. 664126703 -0. 62231 0. 488214 0. 173117 ALD3              |
| 2. 76646E-15 | 0. 177885721 | 0. 598011569 -1. 21492 0. 287402 0. 377969 None              |
| 2. 98424E-15 | 0. 39604593  | 0. 937179795 -1. 0022 0. 164813 -0. 10738 PRM1               |
| 3. 04718E-15 | 0. 236294203 | 0. 378557332 -0. 70176 -0. 15314 -0. 29603 ARE2              |
| 3. 39511E-15 | 0. 051373477 | 0. 868427687 0. 88756 0. 295817 -0. 14074 FYV10              |
| 3. 65894E-15 | 0. 914594311 | 0. 911465377 -1. 54645 -0. 05319 -0. 20829 None              |
| 3. 76699E-15 | 0. 448109038 | 0. 89043028 0. 640759 -0. 09857 -0. 09174 SOG2               |
| 3. 83475E-15 | 0. 126331092 | 0. 593717896 0. 829603 0. 226103 -0. 26257 VID30             |
| 3. 86984E-15 | 1            | 0. 068733809 -0. 59211 0. 004775 0. 410544 REI1              |

|              |              |              |             |           |           |         |
|--------------|--------------|--------------|-------------|-----------|-----------|---------|
| 4. 25585E-15 | 0. 482993634 | 0. 325581139 | 1. 222123   | -0. 17803 | -0. 56356 | ATG1    |
| 4. 47938E-15 | 0. 995919167 | 0. 894068915 | 0. 782847   | 0. 010668 | -0. 11105 | ECL1    |
| 4. 82776E-15 | 0. 795210933 | 0. 483346657 | -0. 62344   | 0. 040647 | -0. 2325  | AIM14   |
| 5. 31921E-15 | 0. 824457464 | 0. 274285823 | 0. 49445    | 0. 029507 | -0. 24597 | PRB1    |
| 5. 35854E-15 | 0. 587156933 |              | 1 0. 617556 | 0. 073296 | -0. 00505 | ABD1    |
| 5. 58208E-15 | 0. 418773131 |              | 1 -0. 42256 | 0. 068059 | 0. 021075 | AC01    |
| 5. 67314E-15 | 0. 781328521 |              | 1 -1. 00997 | 0. 068654 | -0. 0599  | FMP40   |
| 6. 63428E-15 | 0. 446288659 | 0. 764340274 | 0. 555416   | 0. 086106 | -0. 12318 | PRE3    |
| 6. 95275E-15 | 0. 381873848 | 0. 538130573 | -1. 04853   | 0. 179231 | -0. 36616 | SIP2    |
| 7. 01964E-15 | 0. 098839893 | 0. 89915479  | -3. 42219   | 0. 799766 | 0. 533035 | PAU8    |
| 8. 18795E-15 | 0. 094389373 | 0. 615253714 | -0. 77934   | 0. 22759  | 0. 239879 | RSM27   |
| 8. 8633E-15  | 0. 321967781 | 0. 883095126 | -0. 59831   | 0. 115053 | 0. 089513 | SCP1    |
| 1. 00119E-14 | 0. 281429987 | 0. 860528802 | 0. 582731   | -0. 12245 | -0. 09702 | PIM1    |
| 1. 00119E-14 | 0. 954916262 | 0. 91703897  | 0. 480319   | 0. 01231  | -0. 06105 | GET2    |
| 1. 02661E-14 | 2. 6848E-06  | 0. 560238155 | 0. 543491   | 0. 373032 | 0. 184813 | GRE3    |
| 1. 03652E-14 | 0. 719972823 | 0. 461806117 | 0. 458671   | 0. 039669 | -0. 17982 | PUP1    |
| 1. 03652E-14 | 0. 119397766 | 0. 77583136  | -0. 78406   | 0. 216561 | -0. 1681  | RMI1    |
| 1. 03652E-14 | 0. 386071027 |              | 1 -1. 09889 | -0. 18786 | 0. 022932 | PMA2    |
| 1. 05404E-14 | 0. 443115783 | 0. 404345893 | -0. 58487   | -0. 09107 | -0. 24455 | PSR2    |
| 1. 12655E-14 | 2. 72727E-39 | 0. 680777882 | -0. 64231   | 1. 087463 | 0. 175933 | RTC3    |
| 1. 13055E-14 | 0. 826578265 | 0. 834791774 | -0. 82395   | -0. 04857 | -0. 15022 | MRX11   |
| 1. 16638E-14 | 0. 490597664 |              | 1 6. 205693 | 0. 542241 | 0. 553428 | YPS5    |
| 1. 17741E-14 | 0. 986058626 | 0. 712223429 | 1. 124451   | 0. 019304 | 0. 289926 | BNA1    |
| 1. 18706E-14 | 6. 75421E-06 | 0. 931568877 | -0. 47088   | 0. 309417 | 0. 052737 | GDB1    |
| 1. 32787E-14 | 0. 026368793 | 0. 530625906 | -0. 48977   | -0. 18506 | -0. 17366 | PST1    |
| 1. 344E-14   | 0. 759733432 | 0. 739589142 | -2. 40373   | 0. 167034 | -0. 62459 | PAU10   |
| 1. 507E-14   | 0. 752831669 | 0. 298179325 | 0. 628678   | 0. 049701 | -0. 30565 | SRC1    |
| 1. 5781E-14  | 0. 197930958 | 0. 89826709  | -0. 6897    | -0. 16503 | -0. 09744 | MNT3    |
| 1. 58857E-14 | 0. 644005887 | 0. 740020932 | 0. 51128    | -0. 05429 | -0. 12191 | PEX3    |
| 1. 58976E-14 | 0. 001922433 |              | 1 0. 634496 | -0. 31971 | -0. 03099 | MGA2    |
| 1. 68543E-14 | 0. 792192617 |              | 1 -0. 84627 | -0. 05658 | -0. 02918 | REV7    |
| 1. 88991E-14 | 0. 095680569 | 0. 326601143 | 0. 867001   | 0. 260975 | -0. 40789 | SNF3    |
| 2. 07912E-14 | 0. 446288659 | 0. 92745323  | 0. 537871   | -0. 08516 | 0. 064715 | ITR2    |
| 2. 17541E-14 | 0. 47929582  |              | 1 -0. 44841 | -0. 06623 | 0. 026483 | ETT1    |
| 2. 23646E-14 | 0. 054666041 | 0. 023996351 | -0. 78982   | 0. 262295 | 0. 667697 | ATP18   |
| 2. 4342E-14  | 0. 139798632 | 0. 898464555 | 0. 542221   | -0. 14793 | -0. 0776  | NPL3    |
| 2. 44718E-14 | 0. 760989947 | 0. 863626849 | 1. 190774   | -0. 09229 | -0. 19906 | YHR210C |
| 2. 4565E-14  | 0. 526283651 | 0. 322465729 | -0. 52271   | 0. 070353 | 0. 247659 | CSS1    |
| 2. 47874E-14 | 0. 455132842 | 0. 91199009  | 0. 983495   | 0. 15444  | -0. 13013 | SP077   |
| 2. 61551E-14 | 0. 437604832 | 0. 804919045 | 0. 486374   | 0. 07862  | -0. 09818 | RPN12   |
| 2. 62154E-14 | 0. 454673425 | 0. 281435365 | 4. 662053   | -0. 57336 | -3. 51215 | PAU18   |
| 2. 67414E-14 | 0. 619431177 | 0. 822329423 | -0. 64774   | 0. 072489 | -0. 12357 | ARH1    |
| 2. 79564E-14 | 0. 363192071 | 0. 781154036 | -1. 2713    | 0. 228722 | -0. 27183 | AGX1    |
| 2. 80605E-14 | 0. 260412922 | 0. 929344228 | -0. 69755   | 0. 151738 | -0. 08153 | PEX21   |
| 3. 05158E-14 | 0. 008253001 | 0. 868127068 | 0. 445466   | -0. 20005 | 0. 073523 | HIS5    |
| 3. 25154E-14 | 0. 005414104 | 0. 016422539 | -0. 65266   | 0. 298979 | 0. 586255 | TOM5    |
| 3. 28609E-14 | 0. 97665513  | 0. 812668751 | -1. 23972   | 0. 024761 | -0. 24767 | IDP2    |
| 3. 46964E-14 | 0. 026560847 | 0. 457306305 | 0. 447303   | -0. 17343 | -0. 17977 | RSC6    |
| 3. 66543E-14 | 0. 033770868 |              | 1 1. 13802  | 0. 423436 | -0. 00573 | CSR2    |
| 3. 91396E-14 | 0. 979904046 | 0. 570313772 | -0. 96294   | 0. 018324 | 0. 325776 | YBL071C |
| 4. 15538E-14 | 0. 389706992 | 0. 281242785 | -0. 59939   | 0. 104831 | 0. 303178 | YLR050C |
| 4. 34561E-14 | 0. 017099317 | 0. 466577874 | -0. 69721   | 0. 28272  | 0. 275603 | ATP20   |
| 4. 49006E-14 | 0. 266200922 | 0. 959977162 | -0. 66656   | 0. 144796 | 0. 065747 | ORM1    |
| 4. 88341E-14 | 0. 153332607 | 0. 87592683  | 0. 740109   | -0. 19889 | 0. 117766 | INO80   |

|              |              |                                                              |
|--------------|--------------|--------------------------------------------------------------|
| 4. 98058E-14 | 0. 889053342 | 0. 89043028 -0. 46894 0. 02085 -0. 06957 YJU3                |
| 5. 07939E-14 | 0. 060882746 | 0. 28605422 -0. 48583 -0. 16161 0. 244768 ELP2               |
| 5. 41916E-14 | 0. 386071027 | 0. 043873822 -0. 53651 0. 095008 0. 423273 RPS27A            |
| 5. 58708E-14 | 1. 90848E-10 | 0. 53398283 0. 472222 0. 430349 0. 171929 PNC1               |
| 5. 63838E-14 | 0. 055888135 | 0. 969243029 -0. 43768 -0. 14852 0. 040066 ERG11             |
| 5. 97127E-14 | 0. 358012927 | 0. 931005601 0. 510128 0. 096605 0. 059787 PUP2              |
| 6. 25665E-14 | 0. 440961232 | 0. 123887547 -0. 53677 0. 08625 0. 347106 ARF1               |
| 6. 74212E-14 | 0. 343034258 | 1 0. 51824 -0. 10109 0. 02614 EXG2                           |
| 6. 95227E-14 | 0. 301220993 | 0. 88137054 0. 669571 -0. 14056 -0. 10518 SKI7               |
| 6. 96123E-14 | 0. 019167121 | 0. 620580042 -1. 21471 0. 481333 -0. 38432 FBP1              |
| 7. 50321E-14 | 0. 770116444 | 0. 699343867 -0. 63788 0. 047201 0. 174216 RBD2              |
| 7. 74442E-14 | 0. 398327474 | 0. 499488496 1. 819906 0. 319602 0. 715316 YGR174W- <i>l</i> |
| 8. 66007E-14 | 0. 818575144 | 0. 931005601 2. 464151 0. 156925 -0. 29488 YOL155W- <i>l</i> |
| 8. 79912E-14 | 0. 998178363 | 0. 848126811 -0. 55762 -0. 00714 0. 099855 YMR209C           |
| 9. 63305E-14 | 1            | 0. 844390643 0. 458659 -0. 00159 -0. 08433 PRD1              |
| 9. 71601E-14 | 0. 995096172 | 0. 668242189 -1. 41916 0. 020221 -0. 42823 ULI1              |
| 1. 06411E-13 | 0. 788431804 | 0. 265706256 -0. 51358 0. 035926 0. 269341 PN01              |
| 1. 12454E-13 | 0. 443553864 | 0. 795907717 -0. 4798 -0. 07772 0. 101819 TCD1               |
| 1. 20161E-13 | 1. 24175E-13 | 0. 099133414 -0. 53394 0. 555449 0. 365219 BDH1              |
| 1. 25984E-13 | 0. 263065203 | 0. 888371569 -1. 07272 0. 235818 0. 163829 YOR019W           |
| 1. 28294E-13 | 0. 882194755 | 0. 380020625 -0. 57717 0. 027607 -0. 25949 SHE2              |
| 1. 29739E-13 | 0. 954188947 | 0. 752502722 0. 493778 -0. 01334 -0. 11787 DST1              |
| 1. 4207E-13  | 0. 24298702  | 0. 217741418 -0. 53838 0. 123772 0. 305302 SUI1              |
| 1. 44192E-13 | 0. 97156603  | 0. 757681998 -1. 4705 -0. 03149 0. 354574 None               |
| 1. 45707E-13 | 0. 2730437   | 0. 283481217 0. 620836 0. 137903 -0. 32086 MDH2              |
| 1. 47684E-13 | 0. 168010422 | 1 0. 659817 0. 175009 -0. 00054 ALT2                         |
| 1. 5059E-13  | 0. 644005887 | 0. 16670075 0. 564571 -0. 06215 0. 350373 MDN1               |
| 1. 53632E-13 | 0. 00064536  | 0. 855930058 0. 486026 0. 271554 -0. 08609 YLR257W           |
| 1. 61117E-13 | 0. 6123064   | 0. 568492423 0. 551608 -0. 066 -0. 19333 PAH1                |
| 1. 65837E-13 | 0. 536021145 | 0. 837446458 0. 807264 -0. 11161 -0. 15298 HSF1              |
| 1. 66655E-13 | 0. 997705487 | 0. 760963293 0. 496017 -0. 0066 -0. 11695 UBX7               |
| 1. 76164E-13 | 2. 51892E-13 | 0. 005759542 1. 210265 1. 267967 -1. 22503 MPC3              |
| 1. 87041E-13 | 0. 928554724 | 1 0. 418982 0. 014607 0. 024586 SGT2                         |
| 2. 22392E-13 | 0. 905759808 | 0. 871227843 -0. 64879 -0. 0263 0. 107668 KTR2               |
| 2. 28099E-13 | 0. 005024141 | 0. 767199943 -0. 53004 0. 253531 0. 122728 ATP7              |
| 2. 47583E-13 | 0. 984954183 | 0. 674519217 0. 676186 -0. 01246 -0. 19949 YGR130C           |
| 2. 50532E-13 | 0. 977906393 | 1 1. 822488 0. 037827 0. 09305 HXT17                         |
| 2. 55924E-13 | 0. 374954065 | 0. 328122933 0. 429086 0. 080829 0. 211347 UBC4              |
| 2. 59017E-13 | 0. 176877685 | 0. 115159129 0. 542982 0. 143014 -0. 36726 PEX30             |
| 2. 72418E-13 | 0. 036997746 | 0. 008610678 -0. 43805 -0. 16484 0. 438028 UTP9              |
| 2. 75175E-13 | 0. 000145646 | 0. 721271027 0. 819529 0. 502718 -0. 21543 YMR103C           |
| 2. 77437E-13 | 0. 770350536 | 0. 962371769 -0. 48236 0. 036572 -0. 04779 PPN1              |
| 2. 98391E-13 | 0. 707280138 | 0. 274807381 0. 483841 0. 045942 -0. 25699 FRD1              |
| 3. 06893E-13 | 0. 01281546  | 0. 617266112 0. 413533 -0. 18313 -0. 13571 LYS21             |
| 3. 16089E-13 | 0. 904919797 | 0. 867310986 -0. 66979 0. 027588 0. 11458 RMP1               |
| 3. 16135E-13 | 6. 24419E-10 | 2. 0367E-05 0. 509698 0. 467134 -0. 72368 PRM10              |
| 3. 17752E-13 | 0. 519987007 | 0. 330481176 -0. 60618 -0. 08616 0. 296615 MSI1              |
| 3. 24515E-13 | 0. 023022877 | 0. 032004077 -3. 0143 1. 007266 -3. 68766 YBR296C- <i>l</i>  |
| 3. 29526E-13 | 0. 22826373  | 1 -0. 49922 0. 119454 -0. 00697 UBC1                         |
| 3. 41117E-13 | 1            | 0. 17444567 -0. 91834 0. 000501 -0. 56018 CRR1               |
| 3. 43345E-13 | 0. 055168494 | 1 0. 590609 -0. 20977 -0. 02437 AVL9                         |
| 3. 43509E-13 | 0. 085590336 | 0. 023505165 -0. 4323 -0. 13881 0. 387289 GCD10              |
| 3. 43942E-13 | 0. 816346001 | 0. 607571263 -0. 63599 -0. 04129 -0. 2116 YNL035C            |
| 3. 46528E-13 | 0. 950105874 | 0. 91703897 0. 60371 0. 017324 -0. 08131 MAD3                |

|              |              |                                                             |
|--------------|--------------|-------------------------------------------------------------|
| 3. 89852E-13 | 0. 762473638 | 1 0. 504387 0. 040254 -0. 01526 AIM9                        |
| 3. 91972E-13 | 0. 241759995 | 0. 818523526 1. 136351 -0. 27151 -0. 23164 ECM2             |
| 4. 24113E-13 | 0. 008487526 | 0. 040783448 -0. 49571 0. 228406 0. 412378 COX13            |
| 4. 26564E-13 | 0. 645668107 | 0. 92711763 0. 695517 0. 077937 -0. 08835 ERV15             |
| 4. 33564E-13 | 0. 030231646 | 0. 273681355 0. 661909 -0. 26307 -0. 35498 ACA1             |
| 4. 60021E-13 | 0. 101132655 | 0. 373398241 1. 025863 0. 321186 -0. 4809 ZNF1              |
| 5. 11441E-13 | 0. 379997978 | 0. 727497356 0. 485843 0. 091876 0. 127429 MMF1             |
| 6. 1343E-13  | 0. 014673884 | 0. 155227311 1. 049015 0. 46162 -0. 67404 HFM1              |
| 6. 44663E-13 | 0. 881859811 | 1 0. 698625 0. 034911 0. 013633 KSP1                        |
| 6. 56112E-13 | 0. 714551955 | 1 0. 529297 0. 049906 0. 034891 RAD6                        |
| 6. 58202E-13 | 0. 033976678 | 0. 98500242 -0. 42007 0. 162134 0. 033278 ARA1              |
| 6. 70455E-13 | 0. 910686173 | 0. 602319742 -0. 51987 0. 020896 -0. 17581 DPP1             |
| 6. 7091E-13  | 0. 000703715 | 0. 688444366 0. 783066 0. 447226 -0. 22932 MH01             |
| 7. 59769E-13 | 0. 046513917 | 0. 182165955 -0. 48649 -0. 17919 0. 300048 NRP1             |
| 7. 94828E-13 | 0. 0122332   | 0. 940676267 -0. 44968 -0. 20192 0. 051365 FAS1             |
| 8. 57777E-13 | 0. 616558301 | 0. 781154036 0. 426085 0. 051571 0. 098269 PAA1             |
| 8. 86702E-13 | 0. 100684361 | 0. 863302781 -0. 7305 0. 226944 0. 128769 YLF2              |
| 9. 08018E-13 | 0. 369301019 | 0. 167974771 0. 605691 -0. 11845 -0. 3847 VAC7              |
| 9. 54837E-13 | 0. 915872899 | 0. 825106502 0. 554056 0. 02171 0. 112952 HMG2              |
| 9. 79207E-13 | 0. 598332204 | 0. 801754205 -0. 75287 0. 093678 0. 162365 YHR202W          |
| 9. 83794E-13 | 0. 724774474 | 0. 777667569 0. 942237 -0. 08743 -0. 21964 SIP5             |
| 9. 96216E-13 | 0. 693233428 | 0. 67702211 -0. 4707 0. 046605 0. 141016 KRE9               |
| 9. 96216E-13 | 0. 696300915 | 0. 898244609 -0. 45737 0. 045022 0. 069573 YOR342C          |
| 9. 96646E-13 | 5. 75249E-08 | 0. 625394004 0. 478314 0. 399919 0. 158676 SSA1             |
| 1. 02388E-12 | 0. 217407387 | 0. 664126703 0. 533969 -0. 13473 -0. 1657 KSS1              |
| 1. 03866E-12 | 0. 812803114 | 0. 929199554 0. 52049 -0. 03549 0. 065907 GLE2              |
| 1. 0697E-12  | 0. 080149997 | 0. 954808558 0. 593499 -0. 20019 0. 06384 LCB5              |
| 1. 11368E-12 | 0. 842349593 | 0. 980342156 1. 262167 0. 076097 -0. 10701 ZRG8             |
| 1. 15419E-12 | 0. 227918099 | 0. 744376434 0. 607352 0. 150684 -0. 15367 TRR2             |
| 1. 30373E-12 | 0. 590801428 | 1 -0. 99553 -0. 12616 -0. 05295 SNO2                        |
| 1. 31783E-12 | 0. 000364043 | 0. 218691212 0. 535052 0. 321419 -0. 31648 GAT2             |
| 1. 32304E-12 | 0. 73191055  | 0. 553808105 0. 431868 0. 039201 -0. 16091 CUB1             |
| 1. 38647E-12 | 0. 743338017 | 0. 795907717 0. 458962 -0. 04043 -0. 10204 SHE3             |
| 1. 40043E-12 | 0. 311249398 | 0. 721271027 -1. 6088 0. 328519 0. 447711 YJL047C- <i>f</i> |
| 1. 51774E-12 | 0. 730753693 | 0. 805275919 -0. 69743 0. 062844 0. 149791 NNF1             |
| 1. 56168E-12 | 0. 767359823 | 0. 679082788 0. 934207 0. 075403 -0. 28338 STB2             |
| 1. 67999E-12 | 0. 782040669 | 0. 955306351 -0. 61674 0. 046361 0. 066254 COX18            |
| 1. 71147E-12 | 0. 336320447 | 0. 933469902 0. 580177 -0. 12144 -0. 07068 IRC20            |
| 1. 8034E-12  | 0. 007240661 | 0. 146124605 1. 94677 0. 945454 -1. 3248 HXT11              |
| 1. 84164E-12 | 0. 846530385 | 0. 748466881 -0. 71782 -0. 04216 -0. 18128 SNU23            |
| 2. 09511E-12 | 0. 884663483 | 0. 908303081 -1. 02893 -0. 05062 -0. 14945 MMS21            |
| 2. 39565E-12 | 0. 528966778 | 0. 004089016 0. 547335 -0. 08068 -0. 60719 YLR108C          |
| 2. 40075E-12 | 0. 0122332   | 0. 099020366 -0. 52604 -0. 24124 -0. 37978 TDA4             |
| 2. 45007E-12 | 0. 641634198 | 0. 966118712 -1. 10568 0. 125605 -0. 11155 POT1             |
| 2. 47566E-12 | 0. 157263376 | 0. 477818318 -0. 47501 0. 133856 -0. 19891 GLO2             |
| 2. 49915E-12 | 0. 196724669 | 0. 815112247 0. 414327 0. 109717 -0. 08838 GPP1             |
| 2. 60178E-12 | 0. 729652252 | 0. 04122541 -0. 95117 -0. 08669 0. 826464 YKR005C           |
| 2. 60369E-12 | 0. 632634392 | 0. 041689887 0. 808764 -0. 09732 -0. 70051 TOS8             |
| 2. 6054E-12  | 0. 007561283 | 0. 930835922 0. 439581 0. 214311 0. 055498 AIM2             |
| 2. 61841E-12 | 0. 758162333 | 0. 502003374 0. 916691 -0. 07782 0. 374915 RPI1             |
| 2. 63326E-12 | 0. 995214622 | 0. 967394603 0. 367072 -0. 00565 0. 036678 YRA1             |
| 2. 73403E-12 | 0. 254444296 | 0. 549318354 0. 716101 -0. 17351 0. 273463 IMH1             |
| 2. 87135E-12 | 0. 753511485 | 0. 080581045 -0. 49632 0. 042275 0. 374135 RPL11B           |
| 2. 93651E-12 | 1            | 0. 488692236 0. 895337 0. 008841 -0. 37299 TDP1             |

|              |              |                                                      |
|--------------|--------------|------------------------------------------------------|
| 2. 96314E-12 | 0. 466138178 | 0. 446640364 -0. 69185 0. 113609 -0. 30181 MRS4      |
| 3. 05279E-12 | 0. 962059221 | 1 -0. 76531 -0. 01995 -0. 03249 YER158C              |
| 3. 10606E-12 | 0. 71920823  | 0. 979084259 -0. 47145 0. 044658 -0. 04091 PTC7      |
| 3. 20449E-12 | 0. 934332746 | 0. 128116449 0. 744193 0. 026247 -0. 51561 PRP21     |
| 3. 39207E-12 | 0. 360478488 | 0. 385959394 -0. 61105 -0. 12259 -0. 2877 HNM1       |
| 3. 42418E-12 | 0. 238567362 | 1. 68413E-07 -0. 42256 -0. 10423 -0. 73242 HEM13     |
| 3. 55005E-12 | 0. 995214622 | 0. 664126703 -1. 12841 -0. 01704 -0. 35427 MRX3      |
| 3. 59653E-12 | 0. 629304116 | 0. 635840497 -0. 59954 0. 07153 0. 198687 KSH1       |
| 3. 72042E-12 | 0. 065477864 | 1 0. 671555 -0. 24127 0. 033002 BUL2                 |
| 3. 75779E-12 | 0. 315306627 | 0. 870558299 -0. 56241 0. 121661 -0. 09836 OXA1      |
| 3. 76245E-12 | 0. 325985364 | 0. 744381844 -0. 52438 0. 111575 0. 135118 PDP3      |
| 3. 77044E-12 | 0. 463827899 | 0. 868996053 0. 417884 -0. 07035 -0. 0748 RPN8       |
| 3. 90231E-12 | 0. 395197397 | 0. 979069474 0. 528433 0. 100893 0. 046412 LST8      |
| 3. 90747E-12 | 0. 011628293 | 0. 113089839 -0. 67556 0. 312548 0. 479856 RTC6      |
| 3. 95518E-12 | 0. 787133068 | 1 0. 410586 -0. 03132 0. 015457 FPS1                 |
| 3. 98597E-12 | 0. 905759808 | 0. 911946622 -0. 51452 0. 022119 0. 074117 FMP42     |
| 4. 02265E-12 | 0. 159515372 | 0. 767199943 -1. 13429 0. 315471 0. 277082 SE01      |
| 4. 04871E-12 | 0. 663400253 | 0. 968819743 1. 645293 0. 184386 -0. 16425 YIR020C   |
| 4. 063E-12   | 0. 963282012 | 0. 52788087 -0. 41939 0. 01095 0. 165753 LOA1        |
| 4. 23613E-12 | 2. 87766E-09 | 0. 57156263 1. 201889 1. 11246 -0. 45457 LS01        |
| 4. 35687E-12 | 0. 230911149 | 0. 733389979 0. 652472 0. 165227 0. 175603 PPM1      |
| 4. 38395E-12 | 0. 342998394 | 0. 921286576 1. 113998 -0. 23632 -0. 15245 YKR075C   |
| 4. 84702E-12 | 0. 770350536 | 0. 041614907 0. 378685 -0. 03059 0. 331587 FPR4      |
| 4. 89562E-12 | 7. 32313E-05 | 0. 106067898 0. 413602 0. 276421 0. 302214 MDH1      |
| 4. 96457E-12 | 0. 267136118 | 1 -0. 3614 -0. 08599 -0. 01077 ERG20                 |
| 5. 07155E-12 | 0. 089965595 | 0. 29406496 0. 398706 -0. 1344 -0. 21609 CRH1        |
| 5. 09523E-12 | 6. 35933E-12 | 7. 79184E-05 0. 396592 0. 418417 -0. 5615 GLC3       |
| 5. 11391E-12 | 0. 276167395 | 0. 978193638 -0. 48678 -0. 11397 -0. 04315 ERG7      |
| 5. 74925E-12 | 0. 596380201 | 0. 279528124 0. 988063 0. 13048 0. 553896 TDA6       |
| 6. 1339E-12  | 0. 004247119 | 0. 027182603 -0. 38983 -0. 20274 0. 36152 NOG1       |
| 6. 35406E-12 | 0. 102121722 | 0. 103916575 0. 472514 -0. 15487 -0. 34647 URA2      |
| 6. 35406E-12 | 0. 339193543 | 0. 546473621 -0. 46088 0. 097029 0. 177958 MRPL4     |
| 6. 43878E-12 | 0. 166941663 | 0. 385856136 0. 394753 -0. 11267 -0. 19108 TRP3      |
| 6. 6198E-12  | 0. 824457464 | 0. 837344851 -0. 63633 -0. 04253 -0. 12886 YGK3      |
| 6. 92565E-12 | 0. 692438881 | 0. 908303081 0. 551138 0. 057499 0. 082458 YOR131C   |
| 7. 09032E-12 | 0. 889353732 | 0. 131426625 -0. 62365 -0. 03021 -0. 43311 MET13     |
| 7. 11733E-12 | 0. 231864508 | 0. 482770834 0. 363765 -0. 09273 -0. 15565 TUB3      |
| 7. 18667E-12 | 0. 803994881 | 0. 060744575 0. 500917 -0. 03642 -0. 4065 MIG1       |
| 7. 37393E-12 | 0. 914451528 | 1 1. 677329 0. 06942 -0. 09938 RPL39                 |
| 7. 69108E-12 | 0. 28734684  | 0. 188318842 -0. 53011 0. 122455 0. 33767 RPA14      |
| 8. 02048E-12 | 0. 649493592 | 0. 785906893 0. 477651 -0. 05595 0. 113744 ZE01      |
| 8. 1105E-12  | 0. 150647646 | 0. 842759938 0. 533787 -0. 15849 0. 107346 SST2      |
| 8. 26028E-12 | 0. 211239403 | 0. 457306305 0. 546835 0. 144484 -0. 24234 UFD1      |
| 8. 4279E-12  | 1. 49926E-11 | 0. 993440716 -0. 77263 0. 795772 -0. 05867 YJL133C-1 |
| 8. 84528E-12 | 0. 762436308 | 0. 318346243 0. 439605 0. 037169 0. 235395 FBA1      |
| 8. 92357E-12 | 0. 884827129 | 0. 171413013 0. 76389 -0. 03951 -0. 50341 MND2       |
| 9. 10741E-12 | 0. 162783034 | 0. 412531018 0. 464897 -0. 13463 0. 218867 VAS1      |
| 9. 35076E-12 | 0. 819541577 | 0. 605911675 -0. 69173 0. 047256 -0. 24591 SAY1      |
| 9. 39673E-12 | 0. 964932829 | 0. 929344228 -0. 68971 0. 01786 0. 089821 GEP7       |
| 9. 61405E-12 | 0. 311249398 | 0. 201505014 -0. 73907 -0. 16391 -0. 45947 MMP1      |
| 1. 00047E-11 | 0. 014121187 | 0. 560238155 -1. 33222 0. 591602 -0. 52094 HXT13     |
| 1. 00348E-11 | 0. 471162403 | 0. 961511492 0. 486896 -0. 08271 -0. 05274 AMN1      |
| 1. 0558E-11  | 0. 011369315 | 1 -0. 53335 0. 253284 0. 006885 MRP4                 |
| 1. 10588E-11 | 0. 442611824 | 0. 759373966 -0. 48902 0. 086275 0. 124296 AIM45     |

|              |              |              |           |           |           |         |
|--------------|--------------|--------------|-----------|-----------|-----------|---------|
| 1. 13761E-11 | 0. 344342695 | 0. 689558052 | 0. 514876 | 0. 109961 | -0. 15859 | CAT5    |
| 1. 19417E-11 | 0. 369954042 | 0. 659101564 | -0. 69143 | 0. 13921  | 0. 226455 | HER2    |
| 1. 20622E-11 | 0. 715818525 | 0. 770752057 | 0. 401005 | -0. 03983 | -0. 09992 | DSK2    |
| 1. 22615E-11 | 6. 6889E-25  | 1            | 0. 533527 | 0. 830158 | 0. 008245 | PGM2    |
| 1. 25289E-11 | 0. 227967015 | 0. 224206217 | 0. 673975 | 0. 175372 | -0. 41296 | OXR1    |
| 1. 26641E-11 | 0. 274269052 | 0. 328463464 | -0. 48128 | 0. 114804 | 0. 253067 | PPA2    |
| 1. 29028E-11 | 0. 290286754 | 0. 095167231 | 0. 907469 | 0. 213729 | -0. 68365 | ROM1    |
| 1. 32373E-11 | 0. 666045601 | 0. 222458653 | -0. 44024 | 0. 049344 | -0. 27016 | CMP2    |
| 1. 34372E-11 | 0. 639878051 | 0. 02895691  | -0. 49984 | 0. 05981  | 0. 466825 | CGR1    |
| 1. 3469E-11  | 0. 668103802 | 0. 735602795 | 0. 552646 | 0. 062187 | -0. 15115 | TRS23   |
| 1. 41694E-11 | 0. 902912733 | 0. 786584362 | -0. 43644 | -0. 01968 | 0. 103844 | HTB2    |
| 1. 45307E-11 | 0. 010609484 | 0. 049893598 | -0. 51607 | 0. 248889 | 0. 441712 | TOM6    |
| 1. 50194E-11 | 0. 950105874 | 0. 972387712 | 0. 685417 | 0. 021273 | 0. 066752 | SAS2    |
| 1. 50573E-11 | 0. 317595659 | 0. 795458324 | -4. 76718 | -0. 70495 | -1. 15956 | YEL075C |
| 1. 54003E-11 | 0. 995469417 | 1            | 0. 617529 | -0. 00979 | -0. 01181 | SAP30   |
| 1. 55735E-11 | 0. 347850933 | 1            | 0. 59566  | -0. 12762 | -0. 02461 | YGR117C |
| 1. 58655E-11 | 0. 527787705 | 0. 246071819 | 0. 49775  | -0. 07629 | -0. 29718 | CMR3    |
| 1. 65235E-11 | 0. 814756057 | 0. 96675302  | 0. 456131 | 0. 032469 | 0. 048017 | SUB1    |
| 1. 78382E-11 | 9. 74244E-22 | 0. 015213313 | -0. 55409 | 0. 800162 | -0. 559   | DDR2    |
| 1. 88159E-11 | 0. 885106299 | 0. 151369301 | -0. 48714 | 0. 025034 | 0. 336727 | RPA12   |
| 2. 00961E-11 | 0. 48573866  | 0. 23260457  | 0. 586306 | -0. 09804 | -0. 35935 | RIB1    |
| 2. 092E-11   | 0. 085529276 | 1            | 0. 475505 | -0. 16747 | -0. 01605 | YPS3    |
| 2. 1675E-11  | 0. 032251576 | 1            | -0. 94217 | 0. 387813 | -0. 01138 | UPS3    |
| 2. 26141E-11 | 0. 144889995 | 0. 624539387 | -0. 47848 | 0. 144715 | 0. 16785  | VHC1    |
| 2. 48962E-11 | 0. 437046259 | 0. 703292774 | 0. 589539 | -0. 10847 | -0. 17869 | PTK2    |
| 2. 57643E-11 | 0. 22826373  | 0. 546331004 | 0. 606118 | -0. 1604  | -0. 24221 | PEX5    |
| 2. 68833E-11 | 0. 597836233 | 1            | -1. 55443 | -0. 20379 | -0. 01047 | YHL050C |
| 2. 69702E-11 | 0. 347244143 | 0. 87592683  | -0. 6307  | 0. 13436  | -0. 11222 | HRT1    |
| 2. 91524E-11 | 0. 199012093 | 0. 659101564 | -0. 48105 | -0. 13233 | 0. 160616 | EFM2    |
| 3. 14977E-11 | 0. 320232732 | 0. 721271027 | -0. 71389 | 0. 159573 | -0. 20422 | YNG1    |
| 3. 18134E-11 | 0. 15590479  | 0. 990712634 | 1. 922371 | 0. 578618 | -0. 15337 | FRM2    |
| 3. 22872E-11 | 0. 600450086 | 0. 415187473 | 1. 391579 | -0. 19038 | -0. 66948 | YFL051C |
| 3. 22872E-11 | 0. 343957891 | 0. 888371569 | 0. 464297 | 0. 101388 | 0. 080071 | SFT2    |
| 3. 24478E-11 | 7. 02775E-07 | 0. 781154036 | -1. 58233 | 1. 260158 | 0. 383798 | SPL2    |
| 3. 28624E-11 | 0. 366527041 | 0. 912865696 | -0. 38568 | 0. 080392 | -0. 05781 | VPS13   |
| 3. 32393E-11 | 0. 935821617 | 0. 803017727 | 0. 835005 | -0. 03035 | -0. 1938  | KKQ8    |
| 3. 3514E-11  | 0. 424274634 | 0. 937363635 | 1. 600113 | 0. 302905 | -0. 20139 | PH012   |
| 3. 39859E-11 | 0. 115959902 | 0. 837262612 | 0. 466597 | -0. 15416 | 0. 098533 | CDC20   |
| 3. 55262E-11 | 0. 437604832 | 0. 731592804 | -0. 53515 | 0. 097729 | -0. 14993 | CWC21   |
| 3. 63326E-11 | 0. 528101039 | 0. 158941638 | 0. 953805 | 0. 149026 | -0. 6637  | YNL144C |
| 4. 1599E-11  | 0. 413130887 | 1            | 0. 396028 | -0. 07678 | -0. 01888 | GSH2    |
| 4. 22422E-11 | 0. 989192764 | 0. 52960144  | 2. 372841 | -0. 04164 | 1. 071179 | COS3    |
| 4. 29524E-11 | 0. 890100171 | 0. 971847034 | 0. 568451 | -0. 02889 | -0. 05702 | MAF1    |
| 4. 30154E-11 | 0. 840784015 | 0. 861631716 | -0. 5731  | 0. 037001 | 0. 11031  | FMP30   |
| 4. 31165E-11 | 0. 621834431 | 0. 546331004 | 5. 069464 | -0. 53328 | -2. 63512 | YRF1-4  |
| 4. 34265E-11 | 0. 335509445 | 0. 735465999 | -0. 48543 | 0. 106962 | -0. 13545 | MGL2    |
| 4. 41285E-11 | 0. 240168063 | 1            | 0. 772297 | 0. 202433 | -0. 01117 | LCL1    |
| 4. 54216E-11 | 0. 37490782  | 0. 868996053 | 3. 112588 | 0. 639125 | -0. 56782 | IRC18   |
| 4. 5654E-11  | 0. 302233138 | 0. 876579012 | 0. 486723 | -0. 11501 | -0. 08769 | VIP1    |
| 4. 66556E-11 | 0. 767459399 | 0. 526082458 | 0. 634063 | 0. 054469 | 0. 265785 | DPB4    |
| 4. 75346E-11 | 0. 004332188 | 0. 028177898 | 0. 442357 | -0. 24213 | -0. 42687 | GSH1    |
| 4. 84887E-11 | 0. 867220499 | 0. 929303164 | -0. 47494 | -0. 02734 | 0. 064235 | VRG4    |
| 5. 14217E-11 | 0. 219561957 | 0. 650488242 | 0. 403617 | 0. 109227 | 0. 139018 | ARC40   |
| 5. 42368E-11 | 0. 713873054 | 0. 98500242  | -0. 60365 | 0. 061423 | 0. 051911 | SP07    |

|              |              |              |           |           |           |           |
|--------------|--------------|--------------|-----------|-----------|-----------|-----------|
| 5. 45361E-11 | 0. 558898164 | 0. 284855193 | 0. 487309 | -0. 07253 | -0. 28192 | CRP1      |
| 5. 46717E-11 | 0. 482685637 | 0. 612949583 | 0. 539446 | 0. 092722 | -0. 19751 | PFS2      |
| 5. 595E-11   | 0. 46143745  | 0. 041614907 | -1. 34729 | 0. 233266 | -1. 21985 | THI2      |
| 5. 79552E-11 | 0. 497819776 | 0. 30230998  | 0. 562335 | -0. 09396 | -0. 31767 | YPL150W   |
| 5. 95648E-11 | 0. 712206218 | 1            | -5. 90782 | -0. 36377 | 0. 371058 | GEX1      |
| 6. 01281E-11 | 0. 08182657  | 0. 987710835 | -0. 54847 | 0. 195916 | -0. 0458  | ARG8      |
| 6. 23312E-11 | 2. 5607E-06  | 0. 283881682 | -0. 61145 | 0. 487018 | 0. 352838 | GSP2      |
| 6. 35729E-11 | 0. 856203563 | 1            | 0. 49475  | 0. 030474 | 0. 022106 | UBC13     |
| 6. 49368E-11 | 0. 885748557 | 0. 828700369 | -1. 22086 | 0. 062301 | 0. 271916 | ATG10     |
| 6. 63569E-11 | 0. 412238661 | 0. 163539503 | -0. 45758 | 0. 088771 | 0. 319108 | SHR3      |
| 6. 68083E-11 | 0. 382001694 | 1            | 0. 37041  | 0. 076834 | -0. 01156 | CLC1      |
| 6. 90197E-11 | 0. 174275989 | 0. 702041373 | 0. 476819 | -0. 141   | 0. 148969 | HRP1      |
| 7. 02413E-11 | 0. 473870551 | 0. 89043028  | 0. 444783 | 0. 077877 | 0. 076372 | PDX3      |
| 7. 04692E-11 | 0. 00019709  | 0. 000278421 | 1. 317875 | 0. 883443 | -1. 7677  | RTS3      |
| 7. 11198E-11 | 0. 039037511 | 0. 708809273 | 0. 602924 | -0. 25444 | -0. 18511 | SET3      |
| 7. 13716E-11 | 0. 163690013 | 0. 822329423 | -0. 54873 | 0. 163371 | 0. 121918 | RPL28     |
| 7. 53062E-11 | 0. 560250329 | 0. 721271027 | 0. 504665 | -0. 07552 | -0. 14851 | MED2      |
| 7. 5583E-11  | 0. 813330588 | 0. 165466155 | -0. 55285 | 0. 040348 | 0. 385115 | SVP26     |
| 7. 87767E-11 | 0. 302532438 | 0. 666296417 | -1. 09158 | 0. 253009 | -0. 36699 | YGL193C   |
| 8. 07554E-11 | 0. 082198263 | 1            | 0. 502371 | -0. 18347 | -0. 02919 | LHS1      |
| 8. 47479E-11 | 0. 484349463 | 0. 855617443 | -0. 61711 | 0. 104915 | 0. 123222 | DNL4      |
| 9. 32231E-11 | 0. 213168946 | 0. 830042218 | -0. 57005 | 0. 155957 | -0. 1245  | CHO1      |
| 9. 34237E-11 | 0. 476345337 | 0. 041798259 | -0. 52897 | -0. 09198 | 0. 488285 | PZF1      |
| 9. 46051E-11 | 0. 332333267 | 0. 069148732 | -0. 38915 | -0. 08826 | 0. 325517 | HGH1      |
| 9. 98004E-11 | 0. 482993634 | 1            | -6. 38717 | 0. 725753 | -0. 74842 | None      |
| 1. 00606E-10 | 0. 289188979 | 0. 562048326 | -0. 4483  | 0. 109151 | 0. 179117 | SAR1      |
| 1. 012E-10   | 0. 019432143 | 0. 648751155 | 0. 613613 | -0. 2911  | -0. 21552 | IRS4      |
| 1. 012E-10   | 0. 678241823 | 0. 7990478   | -1. 57542 | -0. 17432 | -0. 36928 | SPS4      |
| 1. 07338E-10 | 0. 353430988 | 0. 927489937 | 0. 350384 | -0. 07731 | 0. 049456 | ARO2      |
| 1. 08451E-10 | 0. 096769268 | 1            | -0. 5144  | 0. 179119 | 0. 010334 | ATP12     |
| 1. 09123E-10 | 0. 012654875 | 0. 00883753  | -0. 56975 | 0. 279253 | 0. 635722 | PBI2      |
| 1. 12578E-10 | 0. 004018431 | 0. 201440577 | 0. 682771 | 0. 381782 | -0. 45393 | CAT2      |
| 1. 16298E-10 | 7. 18555E-09 | 0. 726816534 | -0. 56785 | 0. 545247 | -0. 16449 | ISU1      |
| 1. 20121E-10 | 0. 781683071 | 0. 727497356 | 0. 587163 | -0. 04916 | -0. 17155 | STB3      |
| 1. 2053E-10  | 0. 241267716 | 1            | 0. 405448 | 0. 108048 | 0. 027082 | UMP1      |
| 1. 27068E-10 | 0. 205442701 | 0. 967394603 | -1. 16694 | 0. 320123 | 0. 125393 | YIL165C   |
| 1. 29483E-10 | 0. 297448581 | 0. 716456431 | 3. 112661 | 0. 656481 | 1. 159203 | YOR192C-( |
| 1. 31066E-10 | 0. 417419311 | 0. 003494785 | 0. 463661 | -0. 0915  | -0. 56698 | YIL108W   |
| 1. 33405E-10 | 0. 311290484 | 0. 060238728 | -0. 47841 | 0. 112399 | 0. 412918 | RPL33B    |
| 1. 356E-10   | 0. 044199429 | 0. 522788552 | -0. 54732 | 0. 224635 | -0. 23378 | MTC2      |
| 1. 37812E-10 | 0. 679829215 | 0. 931568877 | -1. 11766 | -0. 12555 | -0. 14987 | YNR066C   |
| 1. 42411E-10 | 0. 840784015 | 1            | -0. 55682 | 0. 036956 | 0. 013469 | SNM1      |
| 1. 43884E-10 | 0. 363817999 | 1            | 0. 362641 | 0. 079017 | -0. 01327 | LYS20     |
| 1. 44549E-10 | 0. 867434951 | 1            | -0. 76642 | -0. 04482 | -0. 02904 | OGG1      |
| 1. 48946E-10 | 0. 005645605 | 0. 488692236 | 0. 583591 | 0. 318439 | -0. 26294 | RNY1      |
| 1. 50109E-10 | 0. 184156664 | 1            | 0. 639438 | -0. 18979 | -0. 00035 | BET4      |
| 1. 63688E-10 | 0. 525579538 | 0. 176431816 | -0. 41424 | -0. 06637 | 0. 288523 | TRM11     |
| 1. 64004E-10 | 0. 001985179 | 0. 712529354 | -0. 51947 | 0. 30553  | 0. 158652 | MRPL44    |
| 1. 65049E-10 | 0. 488044682 | 0. 000805631 | 0. 822306 | 0. 142806 | -1. 10006 | MUP3      |
| 1. 66548E-10 | 0. 335205662 | 0. 539256261 | 0. 824835 | -0. 19093 | -0. 34687 | YBR225W   |
| 1. 67083E-10 | 0. 610223632 | 0. 994517386 | -0. 57479 | 0. 077994 | 0. 046191 | UTH1      |
| 1. 75008E-10 | 0. 302233138 | 0. 89043028  | 0. 579137 | -0. 14101 | -0. 10139 | NAB6      |
| 1. 75755E-10 | 0. 046513917 | 0. 234678175 | 0. 899457 | -0. 37966 | -0. 58603 | YPR015C   |
| 1. 84326E-10 | 0. 00147838  | 1            | -0. 46986 | 0. 283448 | -0. 02364 | HAC1      |

|              |              |                                                              |
|--------------|--------------|--------------------------------------------------------------|
| 1. 92977E-10 | 0. 094685918 | 1 0. 723129 -0. 26159 -0. 01872 AZF1                         |
| 1. 96709E-10 | 0. 346584881 | 0. 046842154 0. 853348 0. 193561 -0. 7817 SDP1               |
| 2. 05111E-10 | 0. 286485784 | 0. 072829578 -0. 4274 0. 106341 0. 359857 RPL1B              |
| 2. 10242E-10 | 0. 877072549 | 0. 977577446 0. 378635 -0. 0218 -0. 03701 SPE2               |
| 2. 20108E-10 | 0. 533524502 | 0. 021269734 -0. 36482 0. 057873 0. 377428 NOP15             |
| 2. 30186E-10 | 0. 180943206 | 1 -0. 60309 0. 178166 -0. 0304 OMA1                          |
| 2. 42547E-10 | 0. 092479893 | 0. 315733589 -0. 63188 0. 22605 0. 360487 TOM7               |
| 2. 53475E-10 | 0. 045945353 | 0. 840006224 0. 832967 0. 349671 -0. 18094 TDA10             |
| 2. 55688E-10 | 0. 099660293 | 0. 45277276 0. 355719 -0. 12702 -0. 17076 TRP5               |
| 2. 55688E-10 | 0. 15183452  | 0. 770752057 -0. 4301 0. 135385 0. 113847 CCW14              |
| 2. 64011E-10 | 0. 347850933 | 0. 795907717 0. 552889 -0. 12618 0. 137677 RNH202            |
| 2. 68425E-10 | 0. 360478488 | 0. 781704944 -0. 47077 0. 103698 -0. 12105 BPT1              |
| 2. 71044E-10 | 0. 948230011 | 1 -0. 4543 -0. 0151 0. 025184 AFG2                           |
| 2. 75649E-10 | 0. 797483311 | 1 -0. 49792 -0. 03963 -0. 00142 CCM1                         |
| 2. 80507E-10 | 0. 524017731 | 0. 735465999 0. 353705 0. 057939 -0. 10346 HOG1              |
| 2. 97073E-10 | 0. 121199858 | 0. 058656331 0. 483023 -0. 16536 -0. 42869 YBR071W           |
| 2. 97073E-10 | 0. 003117739 | 0. 091291814 0. 432276 -0. 25411 -0. 35353 NBA1              |
| 3. 00159E-10 | 0. 995096172 | 0. 889649609 0. 423046 -0. 00732 0. 075736 AAP1              |
| 3. 00226E-10 | 0. 977851004 | 0. 883095126 -0. 486 -0. 01147 -0. 08882 MXR1                |
| 3. 08386E-10 | 0. 688094672 | 0. 293015953 2. 728107 -0. 28937 1. 9884 None                |
| 3. 13658E-10 | 0. 858991565 | 1 0. 332904 -0. 02098 -0. 00452 WTM1                         |
| 3. 18959E-10 | 0. 045349065 | 0. 646635061 -1. 45659 0. 586227 0. 531008 YPR145C- <i>i</i> |
| 3. 21717E-10 | 0. 594731542 | 0. 674519217 0. 625576 -0. 09044 -0. 21383 RTG3              |
| 3. 28904E-10 | 0. 782318684 | 1 -0. 44089 0. 037087 -0. 0272 GEP3                          |
| 3. 32624E-10 | 0. 037277785 | 0. 420929331 -0. 54053 0. 233325 -0. 26866 CCC1              |
| 3. 34746E-10 | 0. 826169604 | 0. 920011392 0. 410121 -0. 03006 0. 06205 BLM10              |
| 3. 42087E-10 | 0. 002571956 | 0. 983370642 -0. 37058 -0. 21945 0. 034521 DRE2              |
| 3. 48751E-10 | 1            | 0. 032905196 0. 451341 0. 002084 -0. 44481 VHR2              |
| 3. 56166E-10 | 0. 119807855 | 0. 661759663 -0. 50803 -0. 17306 0. 178429 YDR514C           |
| 3. 60172E-10 | 0. 880612135 | 0. 1771952 0. 578621 -0. 03332 -0. 41114 IKS1                |
| 3. 67201E-10 | 0. 427585494 | 0. 731592804 0. 486948 -0. 0969 -0. 14488 APL1               |
| 3. 73022E-10 | 0. 492643755 | 0. 66765157 -0. 58159 0. 100529 -0. 2014 SPC25               |
| 3. 7395E-10  | 0. 095680569 | 0. 937363635 -0. 57355 0. 205827 0. 076065 NHP6B             |
| 3. 77563E-10 | 0. 02963386  | 0. 202387133 -0. 41583 -0. 1883 0. 283701 UTP4               |
| 3. 79904E-10 | 0. 080001202 | 0. 186880865 -0. 37911 -0. 14308 0. 264483 UBP1              |
| 3. 93181E-10 | 0. 611875648 | 0. 427445927 0. 729488 0. 102351 -0. 36493 YJR039W           |
| 3. 96249E-10 | 0. 914616118 | 0. 406901206 0. 543622 0. 024449 -0. 27943 YGR237C           |
| 3. 97714E-10 | 0. 967317412 | 0. 477818318 0. 63892 -0. 01794 -0. 30015 MSB3               |
| 4. 0388E-10  | 0. 942225336 | 0. 750952753 -0. 73415 0. 025768 -0. 20572 MSH5              |
| 4. 24448E-10 | 0. 000459643 | 0. 099020366 -0. 38129 0. 253165 0. 308789 MRPS9             |
| 4. 37974E-10 | 0. 519603006 | 0. 533816941 -0. 71705 0. 117789 -0. 30801 IME4              |
| 4. 53708E-10 | 0. 836107259 | 1 -0. 35328 0. 024694 -0. 00199 ADO1                         |
| 4. 63896E-10 | 0. 052546303 | 0. 702435074 0. 553726 0. 229436 -0. 17929 MPM1              |
| 4. 66527E-10 | 0. 589846261 | 0. 826782727 0. 741071 0. 109043 -0. 17115 KDX1              |
| 4. 69303E-10 | 4. 27196E-05 | 0. 978799772 -0. 64697 0. 482302 0. 062568 UIP4              |
| 4. 74868E-10 | 0. 820917338 | 1 -2. 68888 0. 187052 0. 12499 SP019                         |
| 4. 81574E-10 | 0. 96826199  | 0. 962371769 -0. 65541 0. 017829 0. 076263 None              |
| 4. 92874E-10 | 0. 099021983 | 0. 559860815 0. 536934 -0. 19559 -0. 22494 SND1              |
| 5. 18236E-10 | 0. 220446608 | 0. 856077623 0. 839047 -0. 24036 0. 175624 ULP2              |
| 5. 45088E-10 | 0. 692438881 | 0. 971609311 0. 589395 0. 067804 -0. 0629 BEM4               |
| 5. 80596E-10 | 0. 407136042 | 0. 345404463 -0. 54429 0. 11184 -0. 30351 TFB3               |
| 5. 84636E-10 | 0. 782318684 | 0. 909621954 0. 425772 -0. 03661 0. 06982 TPM1               |
| 6. 05112E-10 | 0. 360876565 | 0. 861402377 -0. 47061 0. 105629 0. 096275 DDP1              |
| 6. 25895E-10 | 0. 098839893 | 0. 58793448 0. 431677 -0. 15817 -0. 17413 UFD4               |



|              |              |              |           |           |           |           |
|--------------|--------------|--------------|-----------|-----------|-----------|-----------|
| 6. 48722E-10 | 0. 214175707 | 0. 049422293 | -0. 44155 | 0. 126509 | 0. 41293  | TSR2      |
| 6. 67133E-10 | 0. 090833226 | 0. 358747602 | -0. 63641 | 0. 234296 | 0. 351098 | YKL018C-/ |
| 6. 70291E-10 | 0. 93895154  | 0. 919926509 | 0. 539297 | 0. 020417 | -0. 08304 | SLU7      |
| 6. 7943E-10  | 0. 029490195 | 0. 952440864 | -0. 52773 | 0. 240934 | 0. 065619 | CBP6      |
| 6. 89583E-10 | 0. 830118162 | 0. 629134428 | -0. 60357 | -0. 04358 | -0. 22611 | SPT8      |
| 6. 93638E-10 | 0. 642716671 | 0. 043873822 | -0. 39529 | -0. 05152 | 0. 379048 | SLX9      |
| 7. 15168E-10 | 0. 630979654 | 0. 169011865 | 0. 597381 | 0. 080992 | -0. 43593 | JHD1      |
| 7. 16238E-10 | 0. 439485588 | 0. 69956533  | 0. 453241 | 0. 089462 | -0. 14996 | SOL2      |
| 7. 18641E-10 | 0. 010710362 | 0. 041260007 | 0. 540792 | 0. 28771  | -0. 52465 | RCN2      |
| 7. 19523E-10 | 0. 149548529 | 0. 940414551 | 0. 400056 | -0. 13141 | 0. 053357 | SHS1      |
| 7. 30988E-10 | 0. 021955716 | 0. 715570823 | 0. 451637 | -0. 21968 | 0. 143071 | NUP2      |
| 7. 79302E-10 | 0. 827566727 | 0. 688403077 | 0. 62749  | 0. 046641 | -0. 21422 | FBP26     |
| 8. 01225E-10 | 0. 386354047 | 0. 821665755 | -0. 60801 | 0. 130413 | 0. 143226 | MLC2      |
| 8. 10723E-10 | 0. 788431804 | 0. 721271027 | 0. 519171 | -0. 04424 | -0. 16183 | CLF1      |
| 8. 28549E-10 | 0. 018092653 | 0. 994517386 | -1. 26317 | 0. 604935 | -0. 10851 | UBC11     |
| 8. 42398E-10 | 0. 637757348 | 0. 771481707 | -0. 43341 | 0. 05732  | 0. 117714 | ACB1      |
| 8. 52691E-10 | 0. 469895523 | 1            | 0. 429955 | -0. 08088 | 0. 01677  | PRP40     |
| 8. 53122E-10 | 0. 666318943 | 0. 846502628 | 0. 764115 | -0. 09536 | -0. 16804 | ATG20     |
| 9. 0961E-10  | 0. 347067432 | 0. 339480893 | -0. 40238 | -0. 09358 | -0. 22899 | OPT1      |
| 9. 1366E-10  | 0. 516700017 | 1            | 0. 498864 | -0. 08565 | -0. 01177 | CAB3      |
| 9. 14256E-10 | 0. 738978817 | 0. 94443883  | -0. 488   | 0. 049399 | -0. 06377 | HEM3      |
| 9. 36513E-10 | 0. 080514417 | 0. 441720189 | 1. 234364 | -0. 48663 | -0. 64187 | PAU3      |
| 1. 00024E-09 | 1            | 0. 889649609 | 0. 71734  | -0. 00682 | -0. 13231 | TDA11     |
| 1. 0034E-09  | 0. 676672695 | 0. 996250082 | 0. 540953 | -0. 06599 | 0. 044814 | CDC27     |
| 1. 00415E-09 | 0. 504911953 | 1            | 0. 586193 | -0. 10307 | -0. 00807 | RUD3      |
| 1. 007E-09   | 1            | 1            | 0. 474236 | -0. 00304 | -0. 02418 | OTU1      |
| 1. 02908E-09 | 3. 15242E-05 | 0. 480231621 | -0. 73822 | 0. 564723 | -0. 3526  | BLS1      |
| 1. 1121E-09  | 0. 339079516 | 0. 256097342 | -0. 33592 | -0. 07973 | 0. 217339 | IMD3      |
| 1. 21606E-09 | 0. 848272786 | 0. 90453709  | 0. 432885 | 0. 029556 | -0. 07477 | TAH11     |
| 1. 22566E-09 | 0. 921385339 | 1            | -0. 46248 | -0. 02023 | -0. 0145  | PAC10     |
| 1. 25242E-09 | 0. 402991749 | 1            | -0. 42769 | 0. 090334 | -0. 01939 | DEG1      |
| 1. 25516E-09 | 0. 432562651 | 0. 7990478   | -0. 51836 | 0. 10374  | 0. 131675 | YBR096W   |
| 1. 3337E-09  | 0. 050780234 | 0. 136710348 | -0. 75003 | 0. 316089 | -0. 57652 | YCT1      |
| 1. 3378E-09  | 0. 006969693 | 0. 951201607 | -0. 96391 | -0. 53778 | 0. 122254 | DDR48     |
| 1. 35149E-09 | 0. 227967015 | 0. 786058196 | 0. 574772 | 0. 166004 | 0. 153445 | ERV1      |
| 1. 36496E-09 | 0. 833831544 | 0. 712613882 | 0. 41301  | -0. 03025 | -0. 13352 | URA8      |
| 1. 37015E-09 | 0. 501017244 | 0. 713282569 | 0. 617265 | -0. 11022 | -0. 1994  | CFT2      |
| 1. 39433E-09 | 0. 044176684 | 0. 479096709 | 0. 416225 | -0. 18362 | 0. 202131 | GGA2      |
| 1. 41217E-09 | 0. 024098511 | 0. 241434728 | -0. 35587 | 0. 171184 | 0. 23688  | MRPS35    |
| 1. 4313E-09  | 0. 687268707 | 0. 971609311 | 0. 433871 | -0. 05185 | -0. 04731 | IOC2      |
| 1. 44847E-09 | 0. 820787111 | 1            | -0. 48398 | 0. 037036 | -0. 03847 | LAM6      |
| 1. 46197E-09 | 1. 11028E-06 | 1            | -1. 1525  | 0. 99877  | -0. 02778 | SPG4      |
| 1. 48161E-09 | 0. 905759808 | 0. 066622967 | -0. 67397 | -0. 03294 | -0. 60062 | MET32     |
| 1. 58993E-09 | 0. 827341893 | 0. 709422392 | 1. 066212 | 0. 080877 | -0. 351   | ISF1      |
| 1. 60937E-09 | 0. 479033885 | 1            | 0. 335963 | -0. 06288 | 0. 026593 | MTC1      |
| 1. 6753E-09  | 1. 70583E-07 | 0. 876200558 | -0. 49638 | 0. 467289 | 0. 096606 | DCS2      |
| 1. 6961E-09  | 0. 379077824 | 0. 862693719 | 0. 462327 | -0. 10454 | -0. 09719 | PIB2      |
| 1. 77315E-09 | 1            | 0. 264879577 | 0. 399039 | 0. 002165 | -0. 25817 | PAM1      |
| 1. 78495E-09 | 0. 672399752 | 0. 927845118 | 0. 690957 | 0. 086189 | -0. 10353 | YGL117W   |
| 1. 80543E-09 | 0. 035632723 | 0. 168268201 | -0. 39089 | 0. 177674 | 0. 291891 | MRPL1     |
| 1. 82008E-09 | 0. 986843508 | 0. 283724832 | 1. 187418 | 0. 025068 | -0. 73861 | YJL107C   |
| 1. 83561E-09 | 0. 235614716 | 0. 28514767  | 0. 582289 | -0. 16822 | -0. 36624 | SLD2      |
| 2. 05621E-09 | 0. 24298702  | 1            | 0. 463357 | 0. 131943 | 0. 032552 | OCA2      |
| 2. 1333E-09  | 1. 09363E-05 | 0. 854094663 | 0. 739738 | 0. 614873 | 0. 161095 | JEN1      |

|              |              |              |           |           |           |           |
|--------------|--------------|--------------|-----------|-----------|-----------|-----------|
| 2. 16258E-09 | 0. 858991565 | 0. 634900178 | 0. 543546 | -0. 03605 | -0. 20991 | VPS34     |
| 2. 19409E-09 | 0. 75339767  | 0. 90086308  | -0. 55209 | 0. 054596 | 0. 098221 | YDL085C-/ |
| 2. 19409E-09 | 1            | 1            | -0. 37495 | -0. 00081 | 0. 008941 | HHT1      |
| 2. 21098E-09 | 1            | 0. 080581045 | -0. 56945 | 0. 001337 | 0. 498587 | PUF3      |
| 2. 25008E-09 | 0. 209233788 | 0. 108272796 | 0. 73979  | 0. 223409 | -0. 61339 | AIM39     |
| 2. 25683E-09 | 0. 08182657  | 0. 385959394 | 0. 489869 | 0. 193332 | -0. 26983 | HUA1      |
| 2. 27799E-09 | 0. 842773453 | 0. 924605282 | -1. 27726 | -0. 08771 | 0. 201934 | YAR029W   |
| 2. 28789E-09 | 0. 001052654 | 0. 897313673 | -0. 52558 | 0. 344671 | 0. 094978 | COX14     |
| 2. 34593E-09 | 0. 736287769 | 0. 478036572 | 0. 483208 | -0. 05115 | -0. 23719 | PGD1      |
| 2. 34713E-09 | 0. 428360818 | 0. 012916478 | -0. 46465 | 0. 095353 | -0. 53572 | PTR2      |
| 2. 35578E-09 | 0. 924898235 | 0. 280851196 | 0. 334437 | -0. 01465 | 0. 214325 | GUS1      |
| 2. 35578E-09 | 0. 717419826 | 0. 589139583 | 0. 591662 | -0. 06616 | -0. 24602 | UBX2      |
| 2. 47062E-09 | 0. 302233138 | 0. 745371404 | 0. 328017 | -0. 08502 | 0. 098266 | OLA1      |
| 2. 55443E-09 | 0. 443908887 | 0. 735465999 | -0. 5296  | 0. 105535 | -0. 16284 | ERF2      |
| 2. 55573E-09 | 0. 98474138  | 1            | -0. 44219 | 0. 009923 | 0. 00304  | OST6      |
| 2. 68034E-09 | 0. 557203364 | 1            | 0. 425735 | -0. 06987 | -0. 02236 | SIF2      |
| 2. 73082E-09 | 0. 831957837 | 0. 721271027 | -0. 92873 | -0. 06849 | 0. 296476 | YKL071W   |
| 2. 74976E-09 | 0. 120506262 | 0. 093444318 | -0. 44673 | -0. 16004 | 0. 383863 | DBP7      |
| 2. 85659E-09 | 0. 125608279 | 0. 754736247 | 0. 915614 | -0. 32845 | -0. 26868 | IES1      |
| 2. 93581E-09 | 0. 091520513 | 0. 871412074 | 0. 550408 | -0. 21451 | 0. 112643 | FYV8      |
| 2. 93865E-09 | 0. 842773453 | 0. 976922401 | 0. 723991 | 0. 051874 | -0. 07586 | LOT6      |
| 2. 96513E-09 | 0. 795210933 | 0. 029558283 | 0. 512608 | -0. 04438 | -0. 54298 | TUL1      |
| 3. 13899E-09 | 0. 999192444 | 0. 13719416  | -0. 57762 | 0. 009033 | -0. 45644 | YCR061W   |
| 3. 25505E-09 | 0. 013423142 | 0. 708167385 | -0. 45278 | -0. 24138 | -0. 15188 | VTS1      |
| 3. 25505E-09 | 0. 367878735 | 0. 990110569 | 0. 53663  | -0. 12586 | -0. 04919 | SSD1      |
| 3. 31466E-09 | 0. 900055704 | 0. 073409423 | 0. 483213 | -0. 02547 | -0. 43641 | AIM3      |
| 3. 36999E-09 | 0. 054646422 | 0. 733389979 | 0. 390961 | -0. 16942 | 0. 122791 | SSB1      |
| 3. 41888E-09 | 0. 302395299 | 0. 782519814 | 0. 390209 | -0. 10198 | 0. 107612 | PFK2      |
| 3. 48216E-09 | 1            | 0. 410952354 | 0. 60394  | 0. 005832 | -0. 32636 | SKG3      |
| 3. 48216E-09 | 0. 339643562 | 0. 702041373 | 0. 306891 | -0. 07547 | -0. 1051  | SIM1      |
| 3. 64462E-09 | 0. 112919922 | 0. 750952753 | 0. 379879 | -0. 14093 | -0. 11339 | TMA108    |
| 3. 65275E-09 | 0. 690335313 | 1            | -0. 46185 | -0. 05545 | 0. 011129 | YHR078W   |
| 3. 65442E-09 | 0. 737054862 | 0. 50705979  | 0. 664384 | -0. 07124 | -0. 31673 | YMR160W   |
| 3. 66671E-09 | 0. 095644016 | 0. 62830703  | -0. 63649 | 0. 24185  | -0. 24893 | EDC1      |
| 3. 81171E-09 | 0. 855703098 | 0. 400503761 | -0. 44588 | 0. 030091 | -0. 24402 | KIP3      |
| 3. 82877E-09 | 7. 48719E-13 | 0. 405149238 | 0. 601073 | 0. 765721 | 0. 329023 | STF2      |
| 3. 86034E-09 | 0. 259238926 | 1            | 0. 485294 | 0. 137477 | -0. 02483 | NTR2      |
| 3. 88918E-09 | 0. 286101355 | 0. 949031652 | 0. 425893 | -0. 11542 | 0. 056884 | SCP160    |
| 3. 89214E-09 | 0. 027559605 | 0. 881648602 | -0. 36278 | 0. 175679 | -0. 07115 | IDH1      |
| 3. 97216E-09 | 0. 095680569 | 0. 523868802 | 1. 067422 | -0. 42011 | -0. 50853 | YMR320W   |
| 4. 0461E-09  | 0. 666883176 | 0. 726816534 | -0. 42386 | -0. 05426 | -0. 13445 | CDS1      |
| 4. 19413E-09 | 0. 387479358 | 0. 451887664 | 0. 449646 | 0. 101887 | -0. 23151 | YDR306C   |
| 4. 43992E-09 | 0. 748196133 | 0. 384874041 | -0. 42411 | -0. 04365 | 0. 238237 | YOR283W   |
| 4. 54492E-09 | 0. 570311092 | 0. 620580042 | -4. 11654 | -0. 50424 | -2. 21509 | CSM4      |
| 4. 59324E-09 | 0. 545224417 | 1            | 1. 034963 | 0. 175891 | 0. 021368 | PBI1      |
| 4. 70769E-09 | 0. 683010493 | 1            | -0. 6789  | 0. 083077 | -0. 02081 | IST3      |
| 4. 82752E-09 | 3. 9953E-62  | 0. 46824606  | -0. 4627  | 1. 289295 | 0. 233155 | NCE103    |
| 4. 86084E-09 | 1            | 1            | 0. 612796 | 0. 006288 | -0. 0321  | RIM8      |
| 4. 90413E-09 | 0. 899092334 | 0. 46663268  | -0. 38604 | -0. 0205  | 0. 195901 | NOC4      |
| 5. 15328E-09 | 0. 945012036 | 1            | 0. 307351 | -0. 01143 | -0. 00939 | OYE2      |
| 5. 21797E-09 | 1            | 0. 625394004 | 0. 674144 | -0. 0012  | 0. 270597 | XRS2      |
| 5. 62183E-09 | 0. 989163332 | 0. 688444366 | -0. 42746 | 0. 008736 | 0. 152633 | YPQ1      |
| 5. 74787E-09 | 0. 575831175 | 0. 733389979 | 1. 124121 | -0. 18256 | 0. 358824 | YOR365C   |
| 5. 89856E-09 | 0. 321712563 | 0. 927963214 | -0. 3963  | 0. 100935 | -0. 06078 | YHM2      |

|              |              |              |           |           |           |           |
|--------------|--------------|--------------|-----------|-----------|-----------|-----------|
| 5. 94154E-09 | 0. 257727165 | 0. 69828171  | 0. 399863 | -0. 11506 | -0. 14094 | VPS53     |
| 6. 05102E-09 | 0. 001017688 | 0. 158941638 | -0. 4785  | -0. 32573 | -0. 37527 | DSE4      |
| 6. 10417E-09 | 0. 684566541 | 0. 38020077  | -0. 51671 | 0. 063723 | 0. 293964 | PEX13     |
| 6. 12039E-09 | 0. 734964949 | 1            | 0. 344307 | -0. 03751 | -0. 01173 | STE24     |
| 6. 26839E-09 | 0. 346709681 | 0. 361142562 | -0. 501   | -0. 12247 | 0. 292795 | UME1      |
| 6. 72725E-09 | 0. 464383989 | 0. 397744731 | -0. 35096 | -0. 06957 | 0. 195931 | NOG2      |
| 7. 02853E-09 | 0. 013662562 | 0. 795907717 | 0. 401123 | 0. 218797 | -0. 10817 | SDH1      |
| 7. 38611E-09 | 0. 062193215 | 0. 522788552 | 2. 166887 | 0. 896345 | -1. 13581 | YMR082C   |
| 7. 40742E-09 | 0. 682492975 | 0. 67652728  | 0. 803758 | -0. 1018  | -0. 2965  | RPR2      |
| 7. 66432E-09 | 0. 192500342 | 0. 493450262 | 0. 492743 | -0. 15926 | -0. 24446 | ACM1      |
| 7. 90418E-09 | 0. 762704996 | 0. 876200558 | 0. 618332 | 0. 061369 | -0. 12649 | RGC1      |
| 8. 08845E-09 | 0. 989192764 | 0. 372850575 | -1. 76902 | 0. 035293 | -1. 09227 | YGR121W-1 |
| 8. 29411E-09 | 0. 253113882 | 0. 061449807 | -0. 31712 | -0. 0918  | 0. 303102 | UTP5      |
| 8. 44752E-09 | 1            | 0. 715024856 | 0. 433464 | -0. 00411 | -0. 14626 | VAM3      |
| 8. 69115E-09 | 0. 669969608 | 0. 937363635 | 0. 486109 | -0. 06368 | -0. 0705  | ESL2      |
| 8. 8146E-09  | 0. 652629347 | 0. 174129588 | -0. 7733  | -0. 1046  | 0. 601336 | YHR007C-1 |
| 8. 93887E-09 | 0. 391476898 | 1            | 0. 443723 | -0. 10217 | 0. 003766 | COG8      |
| 8. 93958E-09 | 0. 252400336 | 0. 997577123 | 0. 470424 | -0. 13774 | 0. 040882 | SYPI      |
| 9. 00261E-09 | 0. 003618928 | 0. 883095126 | 0. 418605 | -0. 26493 | -0. 08409 | PHO91     |
| 9. 21586E-09 | 0. 107317686 | 1            | 0. 45634  | -0. 17612 | -0. 03074 | SLI15     |
| 9. 23083E-09 | 0. 717511292 | 1            | -5. 47215 | -0. 38508 | 0. 394223 | YIL060W   |
| 9. 2689E-09  | 0. 598147339 | 0. 698640889 | -0. 42739 | 0. 065899 | 0. 151254 | RML2      |
| 9. 32174E-09 | 0. 271844334 | 0. 859769494 | 0. 582002 | -0. 16541 | 0. 129697 | OSH3      |
| 9. 49289E-09 | 0. 498519639 | 0. 967394603 | -0. 44712 | -0. 08357 | 0. 054246 | PRP11     |
| 9. 57672E-09 | 0. 753511485 | 0. 870558299 | -0. 42328 | 0. 043579 | -0. 08931 | ROX3      |
| 9. 65578E-09 | 0. 389906374 | 1            | 0. 501917 | -0. 11623 | 0. 024048 | UBX3      |
| 1. 01999E-08 | 0. 595901981 | 0. 543984117 | 4. 373209 | -0. 52948 | -2. 6209  | YGL258W-1 |
| 1. 02715E-08 | 0. 119925707 | 0. 984628847 | 0. 72053  | -0. 27103 | -0. 07263 | IRR1      |
| 1. 05343E-08 | 0. 052519697 | 0. 044385872 | -0. 45643 | 0. 202652 | 0. 467328 | RPL26A    |
| 1. 06956E-08 | 0. 127179683 | 0. 125525495 | -0. 33992 | 0. 124114 | 0. 285233 | PAM16     |
| 1. 07991E-08 | 0. 843062252 | 0. 706865475 | -1. 53986 | -0. 1092  | 0. 549083 | YBR032W   |
| 1. 10415E-08 | 0. 015182854 | 0. 244196805 | 0. 873885 | 0. 477308 | -0. 61239 | YER084W   |
| 1. 10415E-08 | 0. 587398198 | 0. 88087787  | -0. 35217 | -0. 05595 | 0. 071396 | YPS7      |
| 1. 10789E-08 | 0. 257480037 | 0. 816819753 | -0. 38382 | 0. 111012 | -0. 09856 | UTR4      |
| 1. 11469E-08 | 0. 676672695 | 0. 92942427  | 0. 358622 | 0. 04639  | -0. 05546 | GRH1      |
| 1. 1179E-08  | 0. 524017731 | 0. 04678456  | -0. 35598 | -0. 06372 | 0. 362901 | RPA43     |
| 1. 13954E-08 | 0. 058914883 | 1            | -0. 53398 | 0. 231967 | -0. 03103 | HNT2      |
| 1. 15837E-08 | 0. 413532829 | 1            | 0. 444048 | 0. 098486 | 0. 011676 | SNA3      |
| 1. 17535E-08 | 0. 546851455 | 0. 170622414 | 0. 488425 | 0. 084725 | 0. 384325 | CAF16     |
| 1. 17911E-08 | 0. 91441715  | 0. 433015628 | 0. 460393 | -0. 02284 | -0. 25049 | YML020W   |
| 1. 18791E-08 | 0. 544905056 | 0. 798716083 | 0. 780058 | 0. 136224 | -0. 21235 | XBP1      |
| 1. 18849E-08 | 0. 920697634 | 0. 935686072 | -0. 61385 | 0. 028579 | -0. 09024 | FRT1      |
| 1. 19241E-08 | 0. 813026602 | 0. 863626849 | 0. 559356 | 0. 047036 | -0. 12299 | RTT103    |
| 1. 19418E-08 | 0. 047950909 | 0. 966197359 | 0. 529539 | -0. 24475 | -0. 06553 | ALY1      |
| 1. 20085E-08 | 0. 139315233 | 0. 764340274 | 0. 337239 | 0. 12141  | -0. 10086 | YMR027W   |
| 1. 2016E-08  | 0. 568084758 | 0. 647440092 | 0. 335629 | -0. 05614 | -0. 13289 | RPN7      |
| 1. 20163E-08 | 0. 388201329 | 0. 789249242 | 0. 521816 | 0. 121669 | -0. 14592 | UBC8      |
| 1. 20781E-08 | 0. 085529276 | 0. 828722881 | -0. 41161 | 0. 166553 | 0. 102565 | MEF1      |
| 1. 26533E-08 | 0. 302233138 | 0. 915496392 | -1. 85885 | 0. 473841 | 0. 322548 | IME1      |
| 1. 26937E-08 | 0. 752643009 | 1            | -0. 57294 | 0. 05975  | -0. 01179 | MRM2      |
| 1. 2834E-08  | 0. 207905497 | 1            | 0. 509692 | -0. 162   | -0. 03049 | ARP5      |
| 1. 29953E-08 | 0. 058441959 | 1            | -0. 63269 | 0. 275987 | -0. 02472 | YER152C   |
| 1. 30642E-08 | 0. 770768828 | 0. 255041627 | -0. 86529 | 0. 082629 | -0. 5915  | ARG3      |
| 1. 30746E-08 | 0. 04217695  | 0. 625394004 | 0. 39196  | -0. 18482 | 0. 161505 | FRS1      |

|              |              |              |           |           |           |           |
|--------------|--------------|--------------|-----------|-----------|-----------|-----------|
| 1. 30746E-08 | 0. 363817999 | 0. 917145138 | -0. 52326 | 0. 126437 | 0. 088418 | RNH203    |
| 1. 3194E-08  | 0. 931940862 | 0. 971609311 | 0. 322049 | -0. 01402 | -0. 03756 | KGD2      |
| 1. 33061E-08 | 0. 15218416  | 0. 868996053 | 0. 457474 | 0. 160876 | 0. 09915  | YET3      |
| 1. 36113E-08 | 0. 596380201 | 0. 966118712 | -0. 65194 | 0. 101631 | -0. 08006 | SRB2      |
| 1. 41772E-08 | 0. 393339454 | 0. 786584362 | 0. 813872 | -0. 19048 | -0. 23104 | YMR279C   |
| 1. 41898E-08 | 0. 363817999 | 0. 87592683  | -0. 81654 | -0. 19756 | 0. 169938 | RAD28     |
| 1. 43757E-08 | 0. 613821587 | 0. 848611069 | 0. 404053 | -0. 06169 | 0. 094303 | SEC28     |
| 1. 48338E-08 | 0. 690379299 | 0. 671237406 | -0. 44543 | -0. 05559 | -0. 16894 | ECM25     |
| 1. 48382E-08 | 0. 639535568 | 0. 868996053 | 0. 484438 | 0. 06965  | 0. 105569 | YCR023C   |
| 1. 48437E-08 | 0. 173197183 | 0. 498203091 | 0. 616947 | 0. 209094 | -0. 30869 | BOR1      |
| 1. 49083E-08 | 1            | 0. 164318185 | -0. 34132 | 0. 000713 | 0. 272855 | BUD21     |
| 1. 49364E-08 | 0. 026191089 | 0. 919926509 | -0. 75515 | 0. 379349 | 0. 12495  | SEN15     |
| 1. 525E-08   | 0. 632899025 | 0. 946857728 | -0. 36413 | 0. 052656 | -0. 05072 | HTB1      |
| 1. 61122E-08 | 0. 934743268 | 0. 835951015 | -0. 42206 | -0. 0178  | 0. 103581 | RRP4      |
| 1. 6519E-08  | 0. 775390182 | 0. 444473065 | 0. 402507 | -0. 03893 | 0. 218258 | RFC5      |
| 1. 65727E-08 | 0. 671463457 | 1            | -0. 55615 | 0. 072869 | -0. 03852 | COX10     |
| 1. 66099E-08 | 0. 412262997 | 1            | -0. 61678 | 0. 137027 | -0. 02914 | YSF3      |
| 1. 66139E-08 | 0. 083183964 | 0. 670601582 | 0. 456668 | -0. 1905  | -0. 17446 | NUP53     |
| 1. 66723E-08 | 0. 139315233 | 0. 493774737 | -0. 87476 | 0. 31138  | -0. 43895 | PEX18     |
| 1. 68468E-08 | 0. 125494548 | 0. 443073262 | 0. 321883 | 0. 120517 | -0. 17445 | NTH1      |
| 1. 71574E-08 | 0. 874248567 | 0. 953041258 | -0. 38781 | 0. 025078 | 0. 052342 | YEA6      |
| 1. 75583E-08 | 0. 541996931 | 1            | -0. 46176 | 0. 080786 | 0. 02848  | ICE2      |
| 1. 76556E-08 | 0. 999822551 | 0. 332306908 | 0. 343642 | 0. 005558 | -0. 21519 | GDI1      |
| 1. 77073E-08 | 0. 119522468 | 0. 793556588 | 0. 504887 | -0. 19309 | 0. 141535 | RGA1      |
| 1. 83782E-08 | 0. 079535843 | 0. 91085821  | 0. 407703 | -0. 17245 | 0. 072858 | VPS70     |
| 1. 84223E-08 | 1            | 0. 838466151 | -0. 42926 | 0. 005094 | 0. 104765 | ANT1      |
| 1. 89807E-08 | 0. 015064016 | 0. 171413013 | -1. 67786 | 0. 859664 | -1. 42565 | YHL015W-1 |
| 2. 00633E-08 | 0. 715720978 | 0. 824055384 | -1. 00724 | -0. 11728 | 0. 261488 | LOH1      |
| 2. 02015E-08 | 1            | 0. 870558299 | 0. 36495  | 0. 004782 | 0. 079411 | DYS1      |
| 2. 07122E-08 | 0. 28690473  | 1            | 0. 359805 | 0. 101872 | -0. 02944 | RPN11     |
| 2. 08449E-08 | 0. 716376728 | 0. 721271027 | -0. 47492 | -0. 0559  | -0. 16038 | ABZ2      |
| 2. 08449E-08 | 0. 896694852 | 1            | 0. 389898 | 0. 022091 | 0. 003701 | REH1      |
| 2. 11433E-08 | 0. 576536639 | 0. 705630037 | -0. 64446 | 0. 105853 | 0. 228383 | POF1      |
| 2. 14037E-08 | 0. 644005887 | 0. 756960007 | -0. 36907 | -0. 05256 | 0. 113803 | POM34     |
| 2. 15076E-08 | 0. 500936572 | 0. 859694751 | 0. 33477  | 0. 064251 | -0. 07647 | PRE8      |
| 2. 1736E-08  | 0. 004018431 | 0. 902973992 | 0. 712912 | -0. 46002 | 0. 135096 | SIR4      |
| 2. 19271E-08 | 0. 642750802 | 0. 053817845 | -0. 44071 | 0. 062862 | 0. 445011 | YBL028C   |
| 2. 22035E-08 | 0. 729652252 | 0. 000827407 | -0. 32058 | -0. 03667 | 0. 49231  | RPS28B    |
| 2. 26364E-08 | 1            | 0. 903248727 | 0. 437726 | -0. 00605 | -0. 08273 | MOB2      |
| 2. 2704E-08  | 0. 73107058  | 0. 8119342   | -0. 42474 | -0. 04817 | 0. 112957 | YBR242W   |
| 2. 30646E-08 | 0. 204817452 | 0. 828700369 | 0. 471646 | -0. 15326 | -0. 12054 | CYC8      |
| 2. 40998E-08 | 0. 472617197 | 0. 812322751 | -0. 40174 | 0. 081291 | -0. 10663 | DFG5      |
| 2. 4482E-08  | 1            | 0. 533231335 | 0. 644407 | 0. 007999 | -0. 3116  | MSS11     |
| 2. 45998E-08 | 0. 00020445  | 0. 602672839 | 0. 375152 | 0. 292492 | 0. 163116 | YNK1      |
| 2. 46821E-08 | 0. 36016606  | 0. 924605282 | -0. 42742 | 0. 106261 | -0. 07057 | AVT7      |
| 2. 49364E-08 | 0. 0122332   | 0. 056523979 | -0. 56426 | 0. 320257 | -0. 56391 | FRE7      |
| 2. 49364E-08 | 0. 938970104 | 0. 98500242  | -0. 65821 | -0. 02679 | 0. 066818 | JHD2      |
| 2. 49714E-08 | 0. 280027698 | 0. 793455902 | 0. 415646 | -0. 11993 | 0. 117757 | PAN1      |
| 2. 55749E-08 | 0. 023545099 | 0. 294666115 | 0. 834368 | 0. 441154 | -0. 55343 | AGP2      |
| 2. 66417E-08 | 0. 709900242 | 0. 596430291 | 0. 374353 | 0. 045749 | -0. 16481 | YPF1      |
| 2. 66775E-08 | 0. 259482058 | 1            | 0. 379005 | -0. 11341 | -0. 00229 | NAT1      |
| 2. 73404E-08 | 1            | 0. 466394013 | -0. 50085 | -0. 00203 | 0. 267638 | POP5      |
| 2. 82426E-08 | 0. 759733432 | 0. 553808105 | -0. 41364 | -0. 04289 | 0. 194611 | DRN1      |
| 2. 83787E-08 | 0. 336744763 | 0. 005410787 | -0. 5912  | 0. 152915 | -0. 792   | NRG1      |

|              |              |              |           |           |           |           |
|--------------|--------------|--------------|-----------|-----------|-----------|-----------|
| 2. 86355E-08 | 0. 379859709 | 0. 98500242  | -0. 54953 | 0. 13223  | -0. 05525 | RDR1      |
| 2. 88034E-08 | 0. 349775738 | 0. 889649609 | -0. 3677  | 0. 093384 | -0. 07356 | HEM2      |
| 2. 92114E-08 | 0. 826578265 | 0. 646591934 | -0. 4252  | 0. 034569 | -0. 17189 | DLD2      |
| 2. 92537E-08 | 0. 387774178 | 0. 00883753  | -0. 35257 | 0. 083565 | 0. 456478 | YOP1      |
| 2. 9478E-08  | 0. 387479358 | 1            | 1. 539496 | 0. 367167 | 0. 046663 | None      |
| 2. 97332E-08 | 0. 468941828 | 0. 713702664 | 0. 513445 | -0. 10657 | -0. 18044 | RQC1      |
| 2. 98552E-08 | 0. 10529773  | 0. 523868802 | 0. 334524 | -0. 1337  | -0. 16556 | CSR1      |
| 2. 99557E-08 | 0. 942088826 | 1            | -0. 56867 | -0. 02255 | -0. 0436  | LAM4      |
| 3. 00029E-08 | 8. 48925E-06 | 0. 856077623 | -0. 50719 | 0. 452868 | -0. 11708 | IGD1      |
| 3. 00263E-08 | 0. 007294234 | 0. 033474166 | -0. 37624 | 0. 228056 | 0. 416896 | TIM10     |
| 3. 00263E-08 | 0. 564303748 | 0. 049893598 | -0. 77113 | 0. 130917 | -0. 80267 | HEF3      |
| 3. 03509E-08 | 0. 501310332 | 0. 976568193 | -0. 55938 | 0. 106984 | 0. 062737 | SWM2      |
| 3. 15347E-08 | 0. 663621022 | 0. 888371569 | -0. 46729 | 0. 063916 | 0. 094998 | YCH1      |
| 3. 15944E-08 | 0. 32591766  | 0. 224206217 | 0. 551164 | 0. 147812 | -0. 40994 | YDR262W   |
| 3. 15948E-08 | 0. 879819172 | 0. 024114512 | 0. 654509 | -0. 04274 | -0. 75753 | RAD59     |
| 3. 18245E-08 | 0. 340284679 | 0. 045896858 | -0. 44125 | -0. 11451 | 0. 465687 | RPC53     |
| 3. 207E-08   | 0. 119316051 | 0. 169011865 | 0. 545917 | -0. 21353 | -0. 44305 | NMA2      |
| 3. 44289E-08 | 0. 153838133 | 0. 888371569 | 0. 297207 | -0. 10738 | 0. 061095 | CCT4      |
| 3. 46433E-08 | 0. 286853393 | 0. 398392914 | -0. 61825 | 0. 175421 | 0. 361092 | YNL162W-1 |
| 3. 46433E-08 | 0. 475062233 | 0. 41940157  | -0. 37537 | 0. 076325 | -0. 21263 | YPT52     |
| 3. 46679E-08 | 0. 99746658  | 0. 703954346 | -0. 98438 | 0. 017018 | 0. 354908 | YPL080C   |
| 3. 49962E-08 | 0. 001146851 | 0. 122856134 | -0. 49855 | 0. 351279 | 0. 43428  | YJR085C   |
| 3. 57884E-08 | 0. 399548813 | 0. 822329423 | -0. 35201 | -0. 08232 | 0. 092121 | SAP190    |
| 3. 65684E-08 | 0. 480986795 | 0. 602769533 | -0. 36104 | -0. 07287 | 0. 158304 | RI01      |
| 3. 66703E-08 | 0. 818744368 | 1            | 0. 36098  | 0. 030774 | -0. 01326 | UBC6      |
| 3. 66842E-08 | 0. 799128108 | 1            | 0. 485507 | -0. 04441 | -0. 0141  | CRZ1      |
| 3. 76459E-08 | 0. 430072037 | 0. 811835676 | -0. 36984 | 0. 081982 | 0. 099981 | ADH6      |
| 3. 80657E-08 | 0. 75567778  | 0. 553808105 | -0. 39552 | -0. 04218 | -0. 18721 | RPH1      |
| 3. 85524E-08 | 0. 84140879  | 0. 017068248 | 0. 625574 | 0. 048757 | -0. 76894 | YSW1      |
| 3. 88019E-08 | 0. 47409746  | 0. 743105899 | -0. 3942  | 0. 080547 | 0. 128044 | ESBP6     |
| 3. 8878E-08  | 0. 173422489 | 0. 49370206  | -0. 63874 | -0. 22044 | -0. 33251 | HOS1      |
| 3. 98917E-08 | 0. 332602552 | 0. 049893598 | 0. 411712 | -0. 11006 | -0. 43006 | ROX1      |
| 4. 0349E-08  | 0. 0122332   | 0. 937363635 | -0. 44517 | 0. 257052 | 0. 067028 | RHB1      |
| 4. 0349E-08  | 0. 833160213 | 0. 995105187 | 0. 300317 | -0. 02424 | 0. 028077 | HTS1      |
| 4. 05281E-08 | 0. 899637841 | 0. 546331004 | -1. 55096 | -0. 08415 | 0. 766512 | YAR064W   |
| 4. 11877E-08 | 0. 491008005 | 0. 875200775 | 0. 307088 | -0. 06124 | 0. 066853 | URA1      |
| 4. 17257E-08 | 0. 386354047 | 0. 978338942 | 0. 462207 | -0. 11246 | 0. 05139  | DPH6      |
| 4. 2166E-08  | 0. 156939743 | 0. 710425231 | -0. 54966 | -0. 19672 | -0. 19653 | RIM15     |
| 4. 37734E-08 | 0. 926213546 | 0. 754404021 | 0. 427158 | -0. 02011 | -0. 1358  | SNF2      |
| 4. 43198E-08 | 0. 479751445 | 0. 837446458 | 0. 3961   | -0. 08122 | -0. 10003 | CCT8      |
| 4. 46208E-08 | 0. 703189392 | 0. 66258019  | 0. 367435 | 0. 046352 | -0. 14723 | ODC2      |
| 4. 47843E-08 | 0. 713873054 | 0. 745115043 | -0. 93961 | 0. 112868 | -0. 30384 | AIM33     |
| 4. 49464E-08 | 0. 16750316  | 0. 378557332 | -0. 44089 | 0. 154193 | 0. 267113 | VPS55     |
| 4. 61528E-08 | 0. 266207105 | 0. 998341694 | -0. 32677 | 0. 097341 | 0. 029357 | SHM1      |
| 4. 74694E-08 | 0. 919480877 | 0. 28677728  | -3. 30167 | -0. 1315  | -3. 59845 | SRL4      |
| 4. 79378E-08 | 0. 740566016 | 0. 647440092 | 0. 342653 | -0. 03898 | 0. 141733 | HOL1      |
| 4. 79582E-08 | 0. 414293185 | 0. 967394603 | -1. 78218 | 0. 393556 | 0. 222663 | YDR042C   |
| 4. 80273E-08 | 0. 958689082 | 0. 024114512 | -0. 37969 | 0. 012956 | 0. 446129 | UTP23     |
| 4. 80448E-08 | 0. 446288659 | 0. 840202254 | -0. 4596  | -0. 09964 | -0. 11474 | TRM12     |
| 4. 96765E-08 | 0. 803360108 | 0. 865708429 | 0. 555776 | -0. 05061 | -0. 12679 | RFX1      |
| 5. 04455E-08 | 2. 70033E-14 | 0. 099020366 | 0. 321905 | 0. 466125 | 0. 298968 | TFS1      |
| 5. 33573E-08 | 0. 310202666 | 0. 585629945 | 0. 327341 | -0. 09151 | 0. 150297 | GCD1      |
| 5. 38074E-08 | 1            | 0. 52788087  | -0. 31734 | -0. 00304 | -0. 15806 | PCT1      |
| 5. 38625E-08 | 0. 681507345 | 0. 014857079 | -0. 39601 | -0. 05265 | -0. 49348 | BAP3      |

|              |              |              |           |           |           |           |
|--------------|--------------|--------------|-----------|-----------|-----------|-----------|
| 5. 52779E-08 | 0. 613821587 | 0. 927619939 | -0. 7008  | -0. 10995 | -0. 11553 | SP071     |
| 5. 61673E-08 | 0. 078320718 | 0. 668242189 | -0. 65918 | 0. 283876 | -0. 26017 | PEX2      |
| 5. 81642E-08 | 0. 886858489 | 0. 289121329 | -0. 38022 | 0. 023641 | 0. 261139 | TSR3      |
| 5. 85881E-08 | 0. 021842714 | 0. 935686072 | -0. 38642 | -0. 21078 | -0. 05965 | LEU9      |
| 5. 86996E-08 | 0. 196724669 | 0. 27107384  | 0. 444193 | -0. 15099 | -0. 31515 | LEU2      |
| 5. 97485E-08 | 0. 97156603  | 0. 904680493 | 0. 951026 | 0. 028684 | 0. 183643 | YGR016W   |
| 6. 01512E-08 | 0. 102962713 | 0. 889079564 | 0. 425108 | -0. 17475 | -0. 0884  | FAA3      |
| 6. 10154E-08 | 0. 706333829 | 0. 385959394 | 0. 345006 | -0. 04372 | -0. 20916 | CWH43     |
| 6. 22892E-08 | 0. 196724669 | 0. 848126811 | 0. 36439  | -0. 12389 | 0. 089299 | SPF1      |
| 6. 27069E-08 | 0. 891370788 | 0. 937179795 | 0. 377014 | -0. 02298 | -0. 05824 | STP22     |
| 6. 32803E-08 | 0. 111981557 | 0. 961003401 | -0. 50988 | -0. 20385 | 0. 068572 | AQR1      |
| 6. 42324E-08 | 0. 231230763 | 0. 680395281 | -0. 39377 | -0. 12529 | 0. 153482 | AAT1      |
| 6. 47929E-08 | 0. 582123297 | 0. 037301937 | -0. 35483 | 0. 060128 | 0. 397164 | TRM112    |
| 6. 68296E-08 | 0. 330092657 | 0. 721271027 | 0. 39359  | 0. 107236 | 0. 138971 | RIB3      |
| 6. 71077E-08 | 0. 830118162 | 0. 350046527 | 0. 30835  | -0. 02559 | 0. 197406 | MAP2      |
| 6. 72873E-08 | 0. 974667192 | 0. 709738269 | 0. 628488 | -0. 01831 | -0. 23046 | CDC7      |
| 6. 81882E-08 | 3. 97272E-09 | 0. 318881364 | 0. 337078 | 0. 394393 | 0. 225247 | YJR096W   |
| 6. 83001E-08 | 0. 131339384 | 0. 978193638 | -0. 35842 | 0. 13715  | 0. 040502 | MRP1      |
| 7. 06094E-08 | 0. 431639664 | 0. 971609311 | 0. 413921 | 0. 094093 | 0. 05056  | MRI1      |
| 7. 30371E-08 | 0. 981637103 | 0. 292120686 | 0. 403913 | -0. 0106  | -0. 27849 | PDR5      |
| 7. 43984E-08 | 0. 122042485 | 0. 471735065 | -0. 52225 | 0. 20389  | -0. 28314 | IES5      |
| 7. 51288E-08 | 0. 707673932 | 1            | -0. 67996 | 0. 085097 | -0. 02613 | YJR012C   |
| 7. 8464E-08  | 0. 372381056 | 0. 932413507 | 1. 418337 | 0. 362214 | 0. 227782 | YCL021W-1 |
| 7. 89967E-08 | 0. 446288659 | 1            | -0. 49556 | -0. 10889 | -0. 04166 | SSY5      |
| 8. 12836E-08 | 0. 842370046 | 0. 300568939 | -1. 01582 | 0. 078481 | -0. 68995 | AGP3      |
| 8. 40626E-08 | 0. 398465567 | 0. 295087655 | 0. 350779 | 0. 084915 | -0. 24183 | PGC1      |
| 8. 61088E-08 | 0. 975398981 | 0. 595362002 | 0. 562819 | 0. 016371 | 0. 258168 | SAS5      |
| 8. 6572E-08  | 0. 059385215 | 1            | 0. 453812 | -0. 21287 | 0. 01428  | SWH1      |
| 8. 68879E-08 | 0. 806027991 | 0. 800614102 | -0. 50353 | -0. 0455  | -0. 14379 | ECM5      |
| 8. 81268E-08 | 0. 03959407  | 0. 873533661 | 0. 343734 | 0. 173252 | 0. 077031 | ARC19     |
| 8. 90354E-08 | 0. 65996974  | 0. 400211383 | 0. 429751 | -0. 0622  | -0. 25925 | AKR1      |
| 8. 99845E-08 | 0. 686381253 | 0. 356832107 | 0. 349273 | 0. 047049 | -0. 22323 | LAP2      |
| 9. 00258E-08 | 0. 323293401 | 0. 759373966 | 0. 400518 | 0. 111377 | -0. 12865 | FRE6      |
| 9. 27476E-08 | 0. 382001694 | 0. 661089241 | -0. 43601 | -0. 10886 | 0. 179034 | BAS1      |
| 9. 40611E-08 | 0. 758146893 | 1            | -0. 91196 | 0. 097893 | -0. 05645 | None      |
| 9. 46433E-08 | 0. 57019157  | 0. 906628341 | -0. 55881 | -0. 09783 | 0. 107191 | AIM34     |
| 9. 47573E-08 | 0. 166666159 | 0. 043168161 | -0. 41856 | 0. 150404 | 0. 461314 | RPL36A    |
| 9. 93915E-08 | 0. 98570968  | 0. 776410885 | -0. 39068 | 0. 009499 | -0. 12043 | THI6      |
| 1. 02576E-07 | 0. 731503094 | 0. 786584362 | 0. 477112 | -0. 05723 | 0. 143848 | CAF4      |
| 1. 03295E-07 | 0. 76388804  | 0. 719999469 | 0. 78118  | 0. 083739 | -0. 28079 | ARG82     |
| 1. 04902E-07 | 0. 261791204 | 0. 57885291  | 0. 372789 | 0. 115614 | -0. 17586 | LSB3      |
| 1. 08847E-07 | 0. 937038952 | 0. 937363635 | 0. 323553 | 0. 014259 | -0. 05051 | SHB17     |
| 1. 10514E-07 | 0. 472617197 | 0. 327762587 | 1. 280754 | 0. 273389 | 0. 869641 | None      |
| 1. 13049E-07 | 0. 300891646 | 1            | -1. 14271 | 0. 322188 | -0. 09515 | YJR146W   |
| 1. 14438E-07 | 0. 294101962 | 0. 789517744 | 0. 528865 | -0. 1567  | 0. 158752 | CBF2      |
| 1. 14883E-07 | 0. 554757324 | 0. 169547502 | 0. 509521 | 0. 093553 | -0. 42806 | MYO3      |
| 1. 20321E-07 | 0. 732631743 | 0. 69828171  | 0. 450437 | -0. 05418 | 0. 173871 | IRC25     |
| 1. 22231E-07 | 0. 500337208 | 1            | -0. 58072 | -0. 11673 | -0. 04653 | YLR173W   |
| 1. 22344E-07 | 0. 267877158 | 0. 656171223 | -0. 48664 | 0. 14853  | -0. 20248 | PIH1      |
| 1. 23312E-07 | 0. 080426839 | 0. 667670933 | 0. 304249 | 0. 135367 | 0. 125011 | SBA1      |
| 1. 25926E-07 | 1            | 1            | -0. 35547 | 0. 003217 | -0. 00995 | RAM2      |
| 1. 27596E-07 | 0. 263680126 | 0. 845203377 | 0. 371757 | -0. 11608 | -0. 09477 | EAP1      |
| 1. 29172E-07 | 0. 886323024 | 0. 646591934 | -0. 36831 | 0. 023557 | 0. 156797 | RIM2      |
| 1. 2921E-07  | 0. 147750837 | 1            | 0. 380608 | -0. 14549 | -0. 00209 | SCD6      |

|              |              |                                                              |
|--------------|--------------|--------------------------------------------------------------|
| 1. 32007E-07 | 0. 295659    | 1 0. 360707 -0. 10662 0. 029783 PPS1                         |
| 1. 33164E-07 | 0. 124795835 | 0. 569177865 0. 745919 0. 298836 0. 360759 SRY1              |
| 1. 33164E-07 | 0. 047118728 | 0. 924605282 0. 297259 -0. 14783 -0. 05187 ASN1              |
| 1. 34219E-07 | 0. 884827129 | 0. 906168502 0. 52383 -0. 03467 -0. 10236 YKR078W            |
| 1. 34841E-07 | 0. 048588309 | 1 0. 409892 -0. 20338 0. 010136 YOL036W                      |
| 1. 36042E-07 | 0. 767694173 | 0. 66907663 0. 499219 0. 052838 0. 205196 YCR051W            |
| 1. 36496E-07 | 3. 93083E-05 | 1 0. 362317 0. 322975 -0. 02039 MRP8                         |
| 1. 37002E-07 | 0. 224489795 | 0. 703292774 -0. 51013 0. 167247 0. 1926 YSY6                |
| 1. 37797E-07 | 0. 57661888  | 1 -0. 53835 0. 093977 -0. 03452 RCE1                         |
| 1. 39205E-07 | 0. 143500097 | 0. 990110569 0. 463268 -0. 17931 -0. 04747 BUL1              |
| 1. 41368E-07 | 0. 148042869 | 0. 996250082 -0. 50213 0. 189491 -0. 04797 OSW5              |
| 1. 42295E-07 | 0. 009076575 | 0. 868996053 0. 485898 -0. 30751 0. 11333 ABP140             |
| 1. 52684E-07 | 1. 98697E-07 | 0. 018502313 0. 597525 0. 646583 -0. 74997 YGR161W-(         |
| 1. 56623E-07 | 0. 016892634 | 0. 512491836 0. 432965 -0. 25438 -0. 22893 TIP1              |
| 1. 57338E-07 | 1            | 0. 540028729 -0. 40002 -0. 0024 -0. 2022 FIP1                |
| 1. 58292E-07 | 0. 769449587 | 0. 004134287 -0. 35507 0. 037277 0. 51989 ALB1               |
| 1. 60245E-07 | 0. 36194188  | 0. 439260184 -2. 07956 -0. 51832 -1. 40359 YOR316C- <i>l</i> |
| 1. 6043E-07  | 0. 216106098 | 0. 757681998 0. 676503 -0. 22981 -0. 22265 GLN3              |
| 1. 68975E-07 | 0. 61447221  | 0. 834791774 -0. 44479 -0. 07258 0. 118044 MCM3              |
| 1. 70897E-07 | 0. 539290348 | 0. 669483248 0. 315574 0. 060154 0. 130431 CAJ1              |
| 1. 7092E-07  | 0. 000175552 | 0. 744376434 -0. 46418 0. 383754 0. 156815 UPS1              |
| 1. 72545E-07 | 0. 128488441 | 0. 737474906 0. 752206 -0. 30317 -0. 2615 PUF2               |
| 1. 75709E-07 | 0. 032733021 | 0. 96218812 -1. 05313 -0. 55205 0. 154003 YBR219C            |
| 1. 81986E-07 | 0. 276607865 | 0. 772424036 -0. 56342 0. 171423 -0. 1785 PUS5               |
| 1. 83846E-07 | 0. 500936572 | 0. 002071764 -0. 32029 0. 065295 0. 495787 RPL7B             |
| 1. 83863E-07 | 0. 266554604 | 0. 89043028 0. 403004 -0. 12686 0. 085585 BDP1               |
| 1. 88645E-07 | 0. 613304251 | 0. 680777882 0. 774753 0. 128725 -0. 31232 MTL1              |
| 1. 91179E-07 | 0. 246099917 | 1 5. 274454 -1. 3534 -1. 43204 None                          |
| 1. 95342E-07 | 0. 821809527 | 0. 040783448 -0. 30209 -0. 02668 0. 346465 ARX1              |
| 2. 02084E-07 | 0. 343957891 | 0. 970494097 0. 392254 -0. 10847 -0. 05114 DBF2              |
| 2. 06382E-07 | 1            | 0. 913392788 -0. 41379 -0. 00022 0. 078341 MDV1              |
| 2. 09341E-07 | 0. 312265984 | 1. 74933E-05 0. 398893 0. 115891 -0. 78727 AGP1              |
| 2. 09567E-07 | 0. 374954065 | 0. 409382088 -3. 17335 -0. 68558 -2. 9986 None               |
| 2. 09567E-07 | 0. 615339573 | 0. 919516515 -1. 98819 0. 295631 0. 383942 YKR073C           |
| 2. 10888E-07 | 0. 496469376 | 0. 46824606 -0. 37078 0. 076579 0. 210256 BMH1               |
| 2. 13358E-07 | 0. 990169077 | 0. 931005601 -0. 50763 -0. 01127 -0. 08479 YMR155W           |
| 2. 1586E-07  | 0. 99746658  | 0. 411752857 0. 900168 0. 016952 -0. 5501 BNA2               |
| 2. 18372E-07 | 1            | 0. 715570823 -0. 41023 -0. 00176 -0. 15142 SUR7              |
| 2. 30939E-07 | 0. 850649627 | 0. 063736572 -0. 41665 0. 032563 0. 437976 BUD20             |
| 2. 36706E-07 | 0. 132495235 | 0. 483628979 -0. 4487 0. 178168 0. 249855 IMG1               |
| 2. 46549E-07 | 0. 94036767  | 1 0. 41251 -0. 01803 0. 031179 EAF6                          |
| 2. 51226E-07 | 0. 286080627 | 0. 649502951 -0. 69 0. 208704 -0. 29619 GDH3                 |
| 2. 55275E-07 | 0. 836107259 | 1 0. 464092 0. 039286 -0. 03885 DTD1                         |
| 2. 5776E-07  | 0. 715594168 | 1 -2. 58903 0. 292467 0. 007048 YJL028W                      |
| 2. 58501E-07 | 0. 027086984 | 0. 76280131 -0. 43472 -0. 24095 -0. 1436 YLR049C             |
| 2. 61839E-07 | 0. 912368353 | 0. 482770834 -0. 55373 -0. 03026 0. 309542 BUD23             |
| 2. 63503E-07 | 0. 730492063 | 0. 537223328 0. 47854 0. 059501 -0. 2483 YBL086C             |
| 2. 65685E-07 | 0. 954188947 | 1 -0. 32918 -0. 01248 -0. 00048 FOL1                         |
| 2. 6573E-07  | 0. 027690349 | 0. 308492125 -0. 8385 0. 456463 -0. 58232 PUT1               |
| 2. 66517E-07 | 1            | 0. 338433854 -0. 29802 -0. 00481 0. 201423 TSC13             |
| 2. 69284E-07 | 0. 752831669 | 0. 340307283 0. 480549 -0. 05597 -0. 32457 ATE1              |
| 2. 75719E-07 | 0. 629304116 | 0. 818523526 -0. 47224 -0. 07554 0. 13303 YML018C            |
| 2. 86681E-07 | 0. 515859901 | 0. 264418035 -0. 40241 0. 080862 0. 30248 PMP1               |
| 2. 98357E-07 | 0. 624893229 | 0. 608460014 -0. 39314 -0. 06379 0. 183043 DUS1              |

|              |              |              |           |           |           |                   |
|--------------|--------------|--------------|-----------|-----------|-----------|-------------------|
| 2. 98452E-07 | 0. 884827129 | 0. 264879577 | 0. 452576 | 0. 030693 | -0. 3409  | ECM21             |
| 3. 02438E-07 | 0. 788420725 | 0. 710318897 | -0. 42207 | 0. 042341 | -0. 16191 | CWC25             |
| 3. 05967E-07 | 0. 413008972 | 0. 306543708 | 0. 40473  | -0. 09999 | 0. 289436 | BFR1              |
| 3. 05967E-07 | 1            | 0. 447610866 | -0. 48341 | -0. 00152 | 0. 284822 | GOT1              |
| 3. 06029E-07 | 0. 885340254 | 0. 419798397 | 0. 430373 | 0. 028971 | -0. 26323 | STR2              |
| 3. 06235E-07 | 0. 272539197 | 0. 846605423 | -0. 7819  | 0. 242604 | 0. 201657 | MTC3              |
| 3. 06235E-07 | 1            | 1            | -0. 81525 | 0. 009722 | -0. 01694 | PCH2              |
| 3. 0753E-07  | 1            | 0. 7990478   | 0. 51507  | 0. 008243 | 0. 155462 | BN47              |
| 3. 0753E-07  | 0. 885961871 | 0. 996590888 | 0. 396046 | -0. 02643 | 0. 038732 | YML053C           |
| 3. 13185E-07 | 0. 023226764 | 0. 545272974 | -0. 35333 | 0. 200911 | 0. 181903 | RSM26             |
| 3. 21481E-07 | 0. 967392794 | 0. 768691181 | 0. 336906 | -0. 01138 | -0. 11064 | RTG2              |
| 3. 24408E-07 | 0. 549614536 | 0. 845425423 | 0. 320063 | 0. 061367 | 0. 084183 | GRX3              |
| 3. 26264E-07 | 0. 477410911 | 0. 085125736 | 0. 392231 | 0. 086232 | -0. 39557 | SUR1              |
| 3. 27066E-07 | 0. 989216982 | 1            | -0. 35267 | 0. 008098 | 0. 028062 | SFH5              |
| 3. 32705E-07 | 0. 296901865 | 0. 385959394 | -0. 40947 | 0. 123044 | 0. 262079 | LSM7              |
| 3. 4481E-07  | 1            | 0. 467794221 | 0. 290592 | 0. 00016  | 0. 169001 | ARC1              |
| 3. 50062E-07 | 0. 575429137 | 0. 810360586 | -0. 36183 | -0. 06577 | 0. 10567  | RRP45             |
| 3. 51415E-07 | 0. 669617672 | 1            | -0. 33746 | 0. 04921  | 0. 014218 | PH013             |
| 3. 5621E-07  | 0. 61337272  | 0. 752502722 | -0. 41968 | -0. 07054 | -0. 14272 | KRE5              |
| 3. 66098E-07 | 0. 47437713  | 0. 98500242  | 0. 341064 | -0. 07579 | -0. 03798 | BUG1              |
| 3. 68358E-07 | 0. 092674979 | 0. 927845118 | 0. 353044 | -0. 15835 | 0. 062324 | PUB1              |
| 3. 69948E-07 | 0. 564303748 | 1            | -0. 41711 | 0. 077514 | -0. 00862 | ARG80             |
| 3. 69959E-07 | 0. 564106215 | 0. 904680493 | 0. 491623 | -0. 09273 | -0. 10011 | HDA3              |
| 3. 71708E-07 | 0. 169066016 | 0. 206688593 | 0. 289137 | -0. 10939 | 0. 240727 | RPG1              |
| 3. 72182E-07 | 0. 374953133 | 0. 715570823 | 0. 520004 | -0. 1396  | -0. 19713 | MUK1              |
| 3. 78959E-07 | 0. 813026602 | 1            | 0. 469364 | -0. 04421 | 0. 018041 | YBP2              |
| 3. 90151E-07 | 0. 318191941 | 0. 041643157 | 0. 843869 | 0. 249593 | -0. 98502 | YKR015C           |
| 3. 9706E-07  | 0. 019464433 | 0. 392456706 | 0. 461757 | 0. 273513 | -0. 29516 | MFG1              |
| 3. 99562E-07 | 0. 327016784 | 1            | -0. 31624 | -0. 09141 | -0. 01278 | NRD1              |
| 4. 16312E-07 | 0. 049774859 | 1            | 0. 575828 | 0. 294098 | 0. 048872 | URA10             |
| 4. 21906E-07 | 0. 146749371 | 0. 834791774 | 0. 391013 | -0. 15592 | -0. 10771 | APL4              |
| 4. 30674E-07 | 0. 288190795 | 0. 832278865 | 0. 46098  | -0. 1445  | -0. 12808 | RAV1              |
| 4. 31216E-07 | 0. 633674911 | 0. 769266218 | 0. 321198 | -0. 05213 | -0. 10651 | TWF1              |
| 4. 33044E-07 | 0. 249550151 | 0. 443140468 | 0. 307665 | 0. 10208  | -0. 18514 | SEC17             |
| 4. 33044E-07 | 0. 953568694 | 1            | 0. 454909 | 0. 017985 | -0. 0062  | ZDS1              |
| 4. 40329E-07 | 0. 074432949 | 1            | 0. 5026   | -0. 23867 | -0. 03548 | PIN4              |
| 4. 40661E-07 | 0. 654858264 | 0. 223381301 | -0. 40016 | -0. 06125 | 0. 325007 | TRK1              |
| 4. 45434E-07 | 0. 01270424  | 0. 967394603 | 0. 598137 | 0. 375702 | -0. 08163 | TOS3              |
| 4. 52586E-07 | 0. 152035774 | 1            | 0. 50836  | -0. 20137 | 0. 003916 | BUD3              |
| 4. 55181E-07 | 0. 439204391 | 0. 063736572 | -0. 35649 | 0. 084485 | 0. 384197 | SUA5              |
| 4. 62338E-07 | 0. 010823015 | 0. 192674436 | 0. 413912 | 0. 266414 | -0. 35241 | ATG19             |
| 4. 67588E-07 | 0. 746430113 | 0. 93147427  | 0. 49469  | 0. 059737 | -0. 08444 | FUB1              |
| 4. 69007E-07 | 0. 63232324  | 0. 990110569 | -0. 41218 | -0. 06678 | -0. 0437  | SMF1              |
| 4. 69491E-07 | 0. 806089523 | 0. 721655021 | -0. 41453 | 0. 039653 | 0. 154614 | RRP40             |
| 4. 71546E-07 | 0. 690374119 | 0. 492151956 | 0. 348703 | -0. 04919 | -0. 19707 | POL31             |
| 4. 71976E-07 | 0. 485953152 | 1            | 0. 437309 | -0. 09621 | 0. 033313 | WSC3              |
| 4. 7619E-07  | 0. 122862341 | 0. 786892522 | 0. 476678 | -0. 2012  | 0. 151116 | AFT1              |
| 4. 78236E-07 | 0. 040876372 | 1            | 0. 270041 | -0. 14362 | -0. 00626 | TKL1              |
| 4. 78535E-07 | 0. 078709799 | 0. 917145138 | -0. 3156  | -0. 1475  | -0. 05997 | CYS4              |
| 4. 80677E-07 | 0. 607770092 | 0. 439260184 | 1. 807491 | -0. 31397 | 1. 152993 | YHR022C- <i>t</i> |
| 4. 83353E-07 | 1            | 0. 904680493 | 0. 312305 | -0. 00366 | 0. 064144 | GET3              |
| 4. 84808E-07 | 0. 191649817 | 0. 143826946 | -0. 27476 | 0. 100088 | 0. 25344  | PRC1              |
| 4. 85057E-07 | 0. 05617572  | 1            | -0. 41602 | 0. 206427 | 0. 018957 | PSF3              |
| 4. 91739E-07 | 0. 124795835 | 0. 577843626 | -0. 44059 | 0. 182681 | -0. 21822 | HAP5              |



|              |              |              |           |           |           |         |
|--------------|--------------|--------------|-----------|-----------|-----------|---------|
| 4. 92764E-07 | 1            | 0. 801134504 | -0. 5598  | -0. 00823 | -0. 16905 | ROD1    |
| 5. 09071E-07 | 0. 174071202 | 0. 904680493 | 0. 561674 | -0. 21393 | 0. 115915 | SWI1    |
| 5. 1163E-07  | 0. 962059221 | 0. 760914809 | -0. 33831 | 0. 012172 | 0. 114785 | NAF1    |
| 5. 15532E-07 | 0. 384508616 | 0. 522788552 | -0. 30125 | 0. 079219 | -0. 16319 | SUR2    |
| 5. 20801E-07 | 0. 92822386  | 0. 817868751 | 0. 318261 | 0. 016071 | -0. 09265 | YGL082W |
| 5. 21315E-07 | 0. 630029525 | 0. 848379499 | -0. 36153 | 0. 059112 | 0. 0945   | DGK1    |
| 5. 23093E-07 | 0. 298926458 | 0. 674519217 | -0. 41566 | 0. 126568 | 0. 175426 | RPL15B  |
| 5. 25353E-07 | 0. 566626373 | 0. 984628847 | -0. 3884  | 0. 07289  | -0. 04417 | SLC1    |
| 5. 25643E-07 | 0. 830118162 | 0. 962684605 | -0. 32248 | 0. 02852  | -0. 04561 | ZRT3    |
| 5. 26988E-07 | 0. 996753756 | 0. 373930465 | -0. 58206 | -0. 01153 | -0. 38508 | YTP1    |
| 5. 30263E-07 | 0. 958689082 | 1            | -0. 56362 | 0. 020794 | 0. 008513 | AVT5    |
| 5. 33652E-07 | 0. 251929013 | 0. 019048423 | -0. 37738 | 0. 12465  | 0. 496031 | RPL43A  |
| 5. 59614E-07 | 0. 146319766 | 0. 668242189 | -0. 68178 | 0. 269769 | -0. 29156 | MRX5    |
| 5. 60704E-07 | 0. 156469754 | 0. 529536924 | 0. 41833  | -0. 1654  | -0. 22601 | RFA1    |
| 5. 64346E-07 | 0. 286485784 | 0. 244196805 | 0. 711183 | 0. 225216 | -0. 56377 | FRT2    |
| 5. 88884E-07 | 0. 072758646 | 0. 90423793  | -0. 4776  | -0. 22811 | -0. 09998 | PRP24   |
| 6. 04955E-07 | 0. 985451395 | 0. 984769539 | 1. 710705 | -0. 04483 | 0. 20103  | None    |
| 6. 05986E-07 | 0. 52090053  | 0. 243549962 | -0. 33443 | -0. 0685  | 0. 267237 | TRM7    |
| 6. 05986E-07 | 0. 571586601 | 0. 868996053 | 0. 294377 | 0. 055271 | 0. 071933 | BCY1    |
| 6. 08335E-07 | 0. 795674553 | 0. 868996053 | -0. 37123 | -0. 03728 | -0. 09026 | YPK3    |
| 6. 29812E-07 | 0. 05078776  | 0. 063075209 | 0. 406176 | 0. 209991 | 0. 446331 | RIE1    |
| 6. 34398E-07 | 0. 088292462 | 1            | -0. 7853  | 0. 355853 | -0. 02524 | DAL5    |
| 6. 60254E-07 | 0. 409635054 | 0. 962371769 | -0. 50988 | 0. 128713 | -0. 0732  | IMP1    |
| 6. 65041E-07 | 0. 700423267 | 0. 835951015 | 0. 371066 | -0. 05177 | -0. 10347 | CCL1    |
| 6. 66242E-07 | 0. 803085031 | 0. 526333033 | -0. 37329 | -0. 03671 | 0. 203175 | RBG1    |
| 6. 92509E-07 | 0. 743943626 | 0. 839890676 | -0. 43213 | 0. 052819 | 0. 118388 | MTQ2    |
| 6. 93938E-07 | 0. 029527505 | 0. 000225015 | -0. 2755  | -0. 15619 | 0. 510181 | DBP2    |
| 7. 12454E-07 | 0. 534664597 | 0. 992350824 | 0. 346691 | 0. 069961 | 0. 036696 | APE1    |
| 7. 2071E-07  | 0. 102237849 | 0. 967394603 | 0. 512719 | -0. 23008 | -0. 07116 | BOI1    |
| 7. 3706E-07  | 0. 02375103  | 0. 623756562 | -0. 4588  | 0. 267354 | 0. 21464  | None    |
| 7. 3706E-07  | 0. 712618958 | 0. 673355127 | -0. 34896 | -0. 04696 | 0. 149729 | SOF1    |
| 7. 38952E-07 | 0. 002578481 | 0. 841416921 | -0. 36571 | 0. 270181 | -0. 09959 | MRPL6   |
| 7. 41562E-07 | 0. 084847041 | 0. 027801813 | 0. 628548 | -0. 29761 | -0. 79794 | YDR124W |
| 7. 53035E-07 | 1            | 0. 862828907 | 0. 3047   | -0. 00422 | 0. 077283 | IPP1    |
| 7. 55894E-07 | 0. 794730765 | 0. 889649609 | 0. 626154 | 0. 064616 | 0. 14056  | DBP1    |
| 7. 72395E-07 | 0. 285975278 | 0. 699105653 | -0. 37132 | -0. 11814 | 0. 151825 | RRP36   |
| 7. 80756E-07 | 0. 652629347 | 0. 335356848 | -0. 33362 | 0. 052481 | 0. 235199 | ERV14   |
| 7. 85176E-07 | 0. 761075278 | 0. 843716147 | 0. 499502 | -0. 05825 | -0. 13658 | YBR259W |
| 7. 86199E-07 | 0. 439669949 | 0. 744376434 | -0. 41763 | 0. 100752 | 0. 149724 | YIL161W |
| 8. 03891E-07 | 0. 479437499 | 0. 994376352 | 0. 47019  | -0. 10664 | -0. 04908 | ESC1    |
| 8. 16417E-07 | 0. 261791204 | 0. 957585746 | -0. 29034 | -0. 09635 | -0. 04354 | TAL1    |
| 8. 18742E-07 | 0. 622910776 | 0. 427445927 | -0. 33247 | 0. 056214 | 0. 208573 | RKI1    |
| 8. 33175E-07 | 0. 473677353 | 1            | -2. 80525 | 0. 546064 | 0. 065693 | ECM23   |
| 8. 39181E-07 | 0. 179859102 | 0. 635840497 | -0. 33678 | 0. 127499 | -0. 15545 | COQ6    |
| 8. 68767E-07 | 0. 37490782  | 0. 974952294 | 0. 502284 | -0. 13949 | -0. 06519 | LMO1    |
| 8. 73935E-07 | 0. 37662751  | 0. 411976149 | 0. 556203 | 0. 153021 | -0. 3562  | YGR122W |
| 8. 77383E-07 | 0. 056847963 | 0. 515564407 | 0. 269854 | -0. 13824 | 0. 151787 | DPS1    |
| 8. 78295E-07 | 0. 038009621 | 0. 073721053 | -0. 49113 | 0. 267327 | 0. 527702 | MNP1    |
| 8. 8251E-07  | 0. 327426468 | 0. 152148466 | -0. 29971 | -0. 08916 | 0. 279616 | LCP5    |
| 8. 88793E-07 | 0. 770350536 | 0. 812812583 | -0. 44042 | -0. 04888 | -0. 13139 | DAT1    |
| 9. 03354E-07 | 0. 37662751  | 1            | 0. 342875 | -0. 09457 | 0. 031229 | SEC9    |
| 9. 04695E-07 | 0. 611791537 | 0. 328203537 | 0. 457779 | -0. 08096 | -0. 32865 | RGL1    |
| 9. 04817E-07 | 0. 133951567 | 0. 834791774 | 0. 316486 | -0. 13337 | -0. 08974 | MET7    |
| 9. 10495E-07 | 0. 57019157  | 0. 006535145 | -0. 30294 | -0. 05762 | 0. 454632 | RIX1    |

|              |              |              |           |           |           |                     |
|--------------|--------------|--------------|-----------|-----------|-----------|---------------------|
| 9. 24671E-07 | 0. 553921426 | 0. 672010939 | 1. 231819 | 0. 243051 | -0. 54418 | YFL019C             |
| 9. 30187E-07 | 0. 001137492 | 0. 911946622 | 0. 368706 | -0. 29623 | -0. 07461 | YOX1                |
| 9. 36135E-07 | 0. 028455376 | 0. 849591414 | 0. 376196 | -0. 21906 | 0. 10061  | JEM1                |
| 9. 38716E-07 | 0. 091928673 | 0. 859769494 | -0. 37192 | 0. 171119 | 0. 095781 | PST2                |
| 9. 46254E-07 | 0. 252528913 | 0. 435519854 | 0. 42399  | -0. 1449  | -0. 26607 | DPB2                |
| 9. 53735E-07 | 0. 507001261 |              | 1         | 0. 405701 | -0. 08758 | VNX1                |
| 9. 72568E-07 | 0. 995096172 |              | 1         | 0. 28146  | -0. 00615 | 0. 006438 SCT1      |
| 1. 01597E-06 | 0. 715720978 | 0. 586189737 | -0. 44487 | 0. 05982  | 0. 224133 | SME1                |
| 1. 01765E-06 | 0. 96052846  | 0. 401097318 | 0. 33133  | -0. 01249 | -0. 21742 | SMF3                |
| 1. 02471E-06 | 0. 166697083 | 0. 822329423 | 0. 312583 | -0. 12358 | 0. 092181 | VPS1                |
| 1. 0316E-06  | 0. 028520862 | 0. 564685666 | -0. 32344 | 0. 186297 | 0. 168653 | MRPL7               |
| 1. 04377E-06 | 0. 877848777 | 0. 571875715 | -0. 39963 | -0. 02922 | -0. 20563 | WTM2                |
| 1. 07335E-06 | 0. 761207443 | 0. 721913447 | 0. 443134 | -0. 05216 | -0. 17117 | PTR3                |
| 1. 09231E-06 | 0. 213721853 | 0. 98500242  | 0. 381215 | -0. 13908 | -0. 04434 | NUS1                |
| 1. 11433E-06 | 0. 393739673 | 0. 293969078 | 0. 277218 | -0. 07438 | -0. 20981 | SLA2                |
| 1. 12369E-06 | 0. 428998997 | 0. 052172481 | -0. 28057 | -0. 07018 | 0. 326439 | MAK16               |
| 1. 12761E-06 | 0. 659855933 | 0. 960144684 | 0. 384237 | -0. 0609  | 0. 058163 | SET5                |
| 1. 15343E-06 | 0. 69190085  |              | 1         | -3. 4988  | 0. 384195 | 0. 114582 None      |
| 1. 18309E-06 | 0. 954188947 | 0. 726816534 | 0. 381511 | -0. 01546 | -0. 14613 | TEA1                |
| 1. 18367E-06 | 0. 361349048 | 0. 204980083 | 2. 188985 | -0. 62843 | -2. 07072 | YHL049C             |
| 1. 18367E-06 | 0. 946172816 | 0. 635167376 | 0. 463472 | -0. 0204  | -0. 21818 | YKR023W             |
| 1. 18937E-06 | 0. 753616142 |              | 1         | 0. 315543 | -0. 03847 | -0. 00794 TFG2      |
| 1. 19535E-06 | 0. 799759576 | 0. 749124796 | 0. 503019 | -0. 05175 | -0. 18132 | YBR062C             |
| 1. 21597E-06 | 0. 34403671  | 0. 836379632 | 0. 288587 | -0. 08498 | -0. 08225 | CDC3                |
| 1. 21738E-06 | 0. 030231646 | 0. 699999763 | 0. 535619 | -0. 31149 | 0. 222936 | BEM2                |
| 1. 24687E-06 | 0. 003590694 | 0. 89915479  | 0. 502547 | -0. 37528 | 0. 110953 | YBR238C             |
| 1. 24958E-06 | 0. 52090053  |              | 1         | 4. 864721 | -0. 76727 | -0. 80742 YHR214C-I |
| 1. 27421E-06 | 0. 380967903 | 0. 081519515 | -0. 35465 | 0. 097362 | 0. 379784 | HPT1                |
| 1. 27787E-06 | 0. 521735671 | 0. 116106268 | 0. 773288 | 0. 164507 | -0. 77789 | DOC1                |
| 1. 27787E-06 | 0. 122450158 | 0. 91703897  | -0. 61761 | 0. 265498 | -0. 12194 | RCF3                |
| 1. 28402E-06 | 0. 888561341 | 0. 780208648 | -1. 33567 | -0. 08951 | 0. 450221 | None                |
| 1. 31117E-06 | 0. 003365866 | 0. 863509016 | -0. 5874  | 0. 432576 | -0. 14967 | SDH8                |
| 1. 32775E-06 | 0. 049766072 | 0. 939670905 | 0. 437666 | 0. 233822 | -0. 0737  | COQ3                |
| 1. 33103E-06 | 0. 045727816 | 0. 358747602 | 0. 489532 | -0. 2669  | -0. 34309 | CLN1                |
| 1. 34135E-06 | 0. 279341459 |              | 1         | -1. 05059 | 0. 338462 | 0. 076944 RPL43A    |
| 1. 35618E-06 | 0. 030940804 | 0. 041756428 | -0. 58819 | 0. 335667 | 0. 716341 | LDB18               |
| 1. 3792E-06  | 0. 818564873 | 0. 814212332 | -0. 64129 | 0. 061182 | -0. 19537 | ERI1                |
| 1. 42351E-06 | 0. 595637107 | 0. 868996053 | 0. 592299 | 0. 11009  | -0. 14931 | YIA6                |
| 1. 43361E-06 | 0. 767359823 | 0. 919926509 | 0. 368957 | -0. 04277 | 0. 072559 | MFT1                |
| 1. 50967E-06 | 1. 07863E-14 | 4. 68727E-12 | 0. 303686 | 0. 502153 | 0. 962463 | TDH1                |
| 1. 52288E-06 | 0. 773803168 | 0. 545272974 | 0. 430183 | 0. 048751 | -0. 23524 | POR2                |
| 1. 53319E-06 | 0. 795674553 | 0. 405149238 | -0. 5823  | 0. 060325 | -0. 3827  | CAX4                |
| 1. 56685E-06 | 0. 119099734 | 0. 927845118 | -0. 34145 | 0. 150376 | -0. 0632  | NAT2                |
| 1. 56735E-06 | 0. 765569062 | 0. 967394603 | 0. 461164 | 0. 054104 | -0. 06618 | GIS1                |
| 1. 56989E-06 | 2. 4054E-06  | 0. 184572953 | -0. 29297 | -0. 31849 | -0. 26349 | FAA4                |
| 1. 57277E-06 | 0. 51219348  | 0. 545896138 | 0. 428253 | -0. 09353 | -0. 23442 | NPR1                |
| 1. 57782E-06 | 0. 628086387 | 0. 326601143 | 0. 355079 | -0. 06161 | -0. 26144 | RSR1                |
| 1. 57782E-06 | 1            |              | 1         | 1. 228048 | -0. 00194 | -0. 03637 DCV1      |
| 1. 60362E-06 | 0. 029770467 | 0. 90453709  | -2. 00115 | -1. 10425 | 0. 557122 | None                |
| 1. 62317E-06 | 0. 815168804 | 0. 544181296 | -0. 72586 | -0. 07041 | -0. 39729 | CRF1                |
| 1. 63383E-06 | 0. 614870993 |              | 1         | 0. 434048 | -0. 07772 | 0. 01816 BST1       |
| 1. 64627E-06 | 0. 929614127 | 0. 400503761 | -0. 34771 | -0. 01794 | -0. 23177 | NRM1                |
| 1. 67729E-06 | 0. 526283651 |              | 1         | 0. 587461 | -0. 12548 | -0. 0131 NNK1       |
| 1. 68807E-06 | 0. 98811108  | 0. 637650576 | -1. 38781 | 0. 033621 | -0. 6971  | YBR292C             |

|              |              |              |             |           |           |                   |
|--------------|--------------|--------------|-------------|-----------|-----------|-------------------|
| 1. 69839E-06 | 0. 867434951 | 0. 284855193 | -0. 33818   | -0. 02635 | 0. 264108 | RI02              |
| 1. 70076E-06 | 0. 060866598 | 0. 904680493 | 0. 280398   | -0. 1454  | 0. 060569 | KTR6              |
| 1. 70161E-06 | 0. 014286971 | 0. 708809273 | 0. 426628   | 0. 27783  | -0. 17533 | PDR8              |
| 1. 72938E-06 | 0. 884827129 | 0. 721271027 | -0. 45611   | 0. 032629 | 0. 179565 | DAD3              |
| 1. 73869E-06 | 0. 692438881 | 0. 804181925 | 0. 334769   | 0. 049231 | -0. 10577 | CAP1              |
| 1. 80094E-06 | 0. 894801769 |              | 1           | -0. 37505 | -0. 02488 | 0. 02129 YUR1     |
| 1. 85477E-06 | 0. 458468521 | 0. 029665642 | -0. 80409   | 0. 192288 | -1. 03434 | SHH4              |
| 1. 85503E-06 | 0. 00020564  | 0. 889649609 | 0. 431797   | 0. 390349 | -0. 10083 | PIN3              |
| 1. 86597E-06 | 0. 887609886 | 0. 599955367 | -0. 36552   | 0. 025503 | 0. 18486  | ARF3              |
| 1. 88167E-06 | 0. 489250999 |              | 1           | -0. 60749 | -0. 13768 | -0. 02188 YEA4    |
| 1. 91436E-06 | 0. 672129195 |              | 1           | 0. 411314 | 0. 064018 | 0. 009442 YIH1    |
| 1. 91519E-06 | 0. 472617197 | 0. 008726249 | 0. 373506   | -0. 08897 | -0. 56233 | UGA3              |
| 1. 97225E-06 | 0. 839560652 | 0. 931005601 | 0. 316779   | -0. 02849 | -0. 05743 | PTC5              |
| 2. 046E-06   | 0. 944196518 |              | 1           | 0. 288005 | -0. 01313 | 0. 019168 HSP150  |
| 2. 07574E-06 | 0. 677097244 | 0. 889649609 | 0. 354143   | -0. 05476 | -0. 08299 | CTK3              |
| 2. 09215E-06 | 0. 034320207 | 0. 565513961 | -2. 29811   | 1. 206342 | 1. 32595  | YGL118C           |
| 2. 09215E-06 | 0. 833783236 |              | 1           | 0. 389976 | -0. 03613 | -0. 02724 NMA1    |
| 2. 11435E-06 | 0. 00396909  | 0. 497309894 | -0. 33573   | -0. 25136 | 0. 199666 | REF2              |
| 2. 17077E-06 | 7. 09452E-05 | 0. 107069871 | -0. 35694   | 0. 339682 | 0. 370908 | MBA1              |
| 2. 19036E-06 | 0. 774791949 |              | 1           | 4. 901927 | -0. 42701 | -0. 45145 None    |
| 2. 20592E-06 | 1            |              | 1           | -0. 42948 | 0. 004489 | -0. 02447 MCH5    |
| 2. 23499E-06 | 0. 171047044 | 0. 752502722 | -0. 46505   | 0. 185429 | 0. 169618 | MRPL31            |
| 2. 25714E-06 | 0. 957720524 |              | 0. 87272328 | -0. 45624 | 0. 018044 | -0. 11456 YNL320W |
| 2. 26366E-06 | 0. 478701236 | 0. 844390643 | 0. 632859   | 0. 149821 | -0. 17944 | SHH3              |
| 2. 27121E-06 | 0. 939749928 | 0. 764340274 | -0. 30812   | 0. 014639 | 0. 109781 | NIT3              |
| 2. 31105E-06 | 0. 912049034 |              | 0. 69956533 | -0. 47123 | 0. 028052 | 0. 200201 POA1    |
| 2. 33477E-06 | 0. 84140879  | 0. 274285823 | 3. 274234   | 0. 257164 | -3. 34297 | PAU12             |
| 2. 34131E-06 | 0. 097134775 | 0. 322929135 | 0. 472347   | 0. 224219 | -0. 35466 | ATG3              |
| 2. 38182E-06 | 0. 165995342 | 0. 207271346 | 0. 658432   | 0. 26939  | -0. 58242 | PIG2              |
| 2. 4747E-06  | 0. 122042485 |              | 1           | -0. 43244 | -0. 19279 | -0. 02783 BUD8    |
| 2. 47701E-06 | 0. 125578299 | 0. 571709772 | -0. 33095   | 0. 145946 | 0. 176646 | PAM18             |
| 2. 48863E-06 | 0. 157055527 | 0. 078502393 | -0. 45366   | 0. 186998 | -0. 49841 | ASK1              |
| 2. 49808E-06 | 0. 755774382 | 0. 412531018 | -0. 30626   | -0. 0379  | 0. 204186 | DPH2              |
| 2. 50702E-06 | 3. 1416E-25  | 2. 17479E-06 | 0. 33597    | 0. 746123 | -0. 77927 | ALD4              |
| 2. 54294E-06 | 0. 899105948 | 0. 159522721 | 0. 296052   | -0. 01948 | -0. 28484 | PCS60             |
| 2. 56507E-06 | 0. 631437679 | 0. 888371569 | 1. 152891   | -0. 204   | -0. 27783 | MST28             |
| 2. 56507E-06 | 1            | 0. 917387015 | -0. 32842   | 0. 002833 | -0. 06665 | APS3              |
| 2. 56618E-06 | 0. 70191393  |              | 1           | -0. 32587 | 0. 047292 | -0. 0255 CBP3     |
| 2. 60861E-06 | 0. 506601401 | 0. 847404354 | -1. 1502    | 0. 250917 | -0. 32336 | YFL040W           |
| 2. 66421E-06 | 0. 413242794 | 0. 447610866 | 0. 347479   | -0. 09334 | -0. 2233  | RAX1              |
| 2. 69624E-06 | 0. 634951173 | 0. 916204152 | -0. 97971   | 0. 166309 | -0. 20028 | DON1              |
| 2. 70218E-06 | 0. 914039764 | 0. 982010893 | -0. 3339    | -0. 01981 | -0. 04142 | GIS4              |
| 2. 72796E-06 | 0. 25588535  |              | 1           | -0. 30814 | 0. 107959 | 0. 022225 COQ1    |
| 2. 76486E-06 | 1            | 0. 643231512 | 0. 40308    | -0. 00404 | -0. 19375 | ALG1              |
| 2. 76934E-06 | 0. 689168252 | 0. 868031723 | -0. 43282   | 0. 065007 | -0. 11252 | SDT1              |
| 2. 78236E-06 | 0. 417307855 | 0. 904680493 | 0. 474012   | -0. 12644 | -0. 10474 | SEC8              |
| 2. 79756E-06 | 0. 080426839 | 0. 224910533 | -0. 60548   | 0. 298278 | 0. 524983 | DAD4              |
| 2. 84551E-06 | 0. 103376814 |              | 1           | 0. 300831 | -0. 14182 | 0. 018143 NIC96   |
| 2. 85734E-06 | 0. 333861939 | 0. 036660041 | -1. 56119   | 0. 452493 | 2. 165809 | YDR157W           |
| 2. 85734E-06 | 1            | 0. 969393262 | 0. 438356   | 0. 003293 | -0. 06343 | RAV2              |
| 2. 87383E-06 | 0. 094508839 | 0. 021144549 | -0. 41853   | 0. 199788 | 0. 578989 | NOP10             |
| 2. 89693E-06 | 0. 138285381 | 0. 611594186 | -0. 35752   | 0. 154456 | -0. 18007 | STP3              |
| 2. 90825E-06 | 0. 062446983 | 0. 593717896 | 0. 357448   | -0. 18881 | -0. 18635 | CLA4              |
| 2. 92463E-06 | 0. 884320839 |              | 1           | -0. 47412 | 0. 03489  | -0. 02194 AIM22   |

|              |              |              |           |           |           |                   |
|--------------|--------------|--------------|-----------|-----------|-----------|-------------------|
| 2. 93646E-06 | 0. 444672436 | 0. 897848413 | 0. 488939 | -0. 12461 | -0. 11244 | YLL032C           |
| 2. 96963E-06 | 0. 763546663 | 0. 844390643 | 1. 324703 | 0. 160843 | 0. 381728 | IMA2              |
| 3. 12854E-06 | 0. 022548679 | 0. 000704396 | -0. 55327 | 0. 342493 | -1. 02217 | USV1              |
| 3. 16692E-06 | 0. 981817797 | 0. 985468267 | -0. 3861  | -0. 01148 | -0. 04565 | ATP25             |
| 3. 17434E-06 | 0. 006764926 |              | 1         | -0. 62267 | 0. 445847 | -0. 0531 YPR027C  |
| 3. 1796E-06  | 0. 319484149 | 0. 35748349  | 0. 25977  | -0. 0829  | 0. 189701 | SES1              |
| 3. 19917E-06 | 0. 20840105  |              | 1         | 0. 268159 | 0. 10258  | -0. 02297 PTC3    |
| 3. 23099E-06 | 0. 486326234 | 0. 952954023 | 0. 716151 | -0. 16979 | -0. 11696 | GPB1              |
| 3. 25618E-06 | 0. 488031192 | 0. 69579659  | 0. 310487 | -0. 07307 | 0. 13631  | KTR3              |
| 3. 25618E-06 | 0. 311879301 | 0. 913392788 | -0. 42365 | -0. 13594 | 0. 089339 | FIG2              |
| 3. 27748E-06 | 0. 676672695 |              | 1         | -0. 77263 | -0. 12001 | 0. 066882 YGR050C |
| 3. 31718E-06 | 1. 25272E-06 |              | 1         | 0. 295698 | -0. 34121 | -0. 02373 SFG1    |
| 3. 31751E-06 | 0. 300891646 | 0. 812649115 | -0. 39325 | -0. 12876 | 0. 124604 | SAS4              |
| 3. 32264E-06 | 0. 632810857 | 0. 713395097 | 0. 800511 | -0. 1414  | -0. 33211 | ATG15             |
| 3. 3306E-06  | 0. 672577856 | 0. 737914729 | 0. 336528 | -0. 05355 | -0. 13051 | SED5              |
| 3. 45468E-06 | 0. 054556292 | 0. 976378097 | 0. 442182 | -0. 24203 | 0. 059837 | SEC3              |
| 3. 45468E-06 | 1            |              | 1         | 0. 352797 | 0. 005698 | -0. 02395 DBF4    |
| 3. 4578E-06  | 0. 349747954 | 0. 876200558 | -0. 85948 | 0. 255662 | 0. 215061 | YNL143C           |
| 3. 46065E-06 | 0. 663621022 | 0. 868031723 | 0. 613104 | -0. 10082 | 0. 162261 | HOT13             |
| 3. 53291E-06 | 0. 479437499 | 0. 28677728  | 0. 301171 | -0. 07241 | 0. 242419 | IES2              |
| 3. 53318E-06 | 0. 384002013 | 0. 753347689 | 1. 049325 | -0. 30506 | -0. 39881 | YPL257W           |
| 3. 62537E-06 | 0. 94100612  | 0. 796342002 | 0. 398086 | -0. 0191  | -0. 13273 | KEL2              |
| 3. 66967E-06 | 0. 091562555 | 0. 771782988 | -0. 65603 | 0. 316523 | -0. 2334  | THI73             |
| 3. 72351E-06 | 0. 653413831 | 0. 962585601 | 0. 819736 | -0. 1392  | 0. 126995 | YBR196C-I         |
| 3. 7494E-06  | 0. 203043786 | 0. 82890057  | -0. 4285  | 0. 165145 | -0. 12998 | UIP3              |
| 3. 7494E-06  | 0. 866762221 | 0. 869100567 | 0. 285361 | 0. 023266 | -0. 07472 | RPN10             |
| 3. 82463E-06 | 0. 434023315 | 0. 789517744 | 0. 278784 | -0. 07317 | 0. 095296 | NPA3              |
| 3. 86838E-06 | 0. 094415043 | 0. 744376434 | 0. 428795 | 0. 20959  | -0. 16423 | EST3              |
| 3. 94468E-06 | 0. 39604593  | 0. 267742408 | -0. 5887  | 0. 163295 | 0. 487456 | MRPL37            |
| 3. 95789E-06 | 0. 21006721  | 0. 192811777 | -0. 27136 | -0. 10397 | 0. 251589 | URA7              |
| 3. 99888E-06 | 0. 01837786  | 0. 953041258 | -0. 53456 | 0. 344908 | 0. 086979 | MIC12             |
| 4. 01571E-06 | 1            | 0. 712529354 | 0. 357091 | -0. 00427 | -0. 15    | MCY1              |
| 4. 02265E-06 | 0. 001239292 | 0. 831370236 | 1. 136312 | 0. 955114 | -0. 34386 | SPG1              |
| 4. 07076E-06 | 0. 11971678  | 0. 354608469 | 0. 442962 | -0. 20532 | -0. 32718 | CAF120            |
| 4. 09208E-06 | 0. 604739673 | 0. 451184565 | 0. 264155 | 0. 050081 | 0. 172379 | YDJ1              |
| 4. 09208E-06 | 1            | 0. 871227843 | 0. 410785 | -0. 00682 | -0. 10696 | TAF3              |
| 4. 19911E-06 | 0. 638263859 |              | 1         | 0. 30849  | -0. 05418 | 0. 015312 SEC21   |
| 4. 20565E-06 | 0. 37662751  | 0. 971609311 | -0. 37189 | -0. 10827 | 0. 052989 | PBY1              |
| 4. 20924E-06 | 1. 40389E-09 | 0. 711247098 | 0. 333731 | 0. 46555  | 0. 141463 | SSE2              |
| 4. 22134E-06 | 0. 0122332   | 0. 87592683  | -0. 6233  | 0. 423325 | 0. 157483 | COX19             |
| 4. 26141E-06 | 0. 630769708 |              | 1         | 0. 7864   | -0. 14198 | 0. 004309 SGA1    |
| 4. 27783E-06 | 0. 603345299 | 0. 927619939 | -0. 37601 | 0. 071066 | 0. 072766 | TIF6              |
| 4. 35438E-06 | 0. 254018093 | 6. 38095E-10 | 0. 387455 | 0. 139734 | -1. 1364  | DIP5              |
| 4. 39209E-06 | 0. 04685584  | 0. 996250082 | 0. 309111 | -0. 17602 | -0. 0337  | EUG1              |
| 4. 42867E-06 | 0. 447017626 | 0. 863509016 | -0. 33418 | -0. 08538 | 0. 090237 | KAR4              |
| 4. 43604E-06 | 0. 675114365 | 0. 661089241 | 0. 245687 | 0. 03929  | 0. 11704  | APE3              |
| 4. 46524E-06 | 0. 758077955 | 0. 573905565 | 0. 423794 | -0. 054   | -0. 23206 | HCS1              |
| 4. 49387E-06 | 0. 167141351 | 0. 565702828 | 0. 983877 | 0. 412222 | -0. 54288 | YAT1              |
| 4. 49961E-06 | 0. 350666026 | 0. 674877638 | -0. 50257 | 0. 152426 | -0. 22988 | ACH1              |
| 4. 56473E-06 | 0. 61766781  | 0. 058656331 | 0. 521237 | 0. 096592 | -0. 62501 | SAF1              |
| 4. 58102E-06 | 0. 653413831 | 0. 224910533 | -0. 38028 | 0. 063995 | 0. 337618 | TRX2              |
| 4. 58659E-06 | 0. 905551788 | 0. 929199554 | -0. 43157 | -0. 02778 | -0. 08291 | VPS30             |
| 4. 60066E-06 | 0. 07176975  | 0. 665743457 | 0. 313013 | -0. 16398 | 0. 148092 | ILS1              |
| 4. 65672E-06 | 0. 454673425 | 0. 574102224 | 0. 335629 | -0. 08564 | -0. 18396 | TYR1              |

|              |              |              |           |           |           |         |
|--------------|--------------|--------------|-----------|-----------|-----------|---------|
| 4. 70425E-06 | 0. 148485947 | 0. 05005618  | 0. 853262 | 0. 372803 | -1. 06221 | ABM1    |
| 4. 7163E-06  | 0. 270560696 | 0. 962684605 | 0. 373549 | -0. 13214 | -0. 05811 | SWI5    |
| 4. 7577E-06  | 0. 736287769 | 0. 689558052 | -0. 86949 | -0. 1167  | 0. 388842 | YML122C |
| 4. 81258E-06 | 0. 801762915 | 0. 517082803 | -0. 35393 | -0. 03788 | 0. 211837 | NCS2    |
| 4. 88369E-06 | 0. 473710488 | 0. 264879577 | 0. 450074 | 0. 110653 | 0. 3806   | LSM3    |
| 4. 88369E-06 | 0. 838648058 | 0. 807027851 | -0. 78906 | -0. 07289 | 0. 257752 | SPG3    |
| 4. 98588E-06 | 1            | 0. 026784925 | 0. 369422 | 0. 004435 | -0. 50877 | YLR352W |
| 5. 00939E-06 | 0. 39100906  | 0. 339657587 | 0. 287181 | -0. 08229 | 0. 218503 | THS1    |
| 5. 05333E-06 | 1            | 0. 871227843 | -0. 49379 | -0. 00947 | -0. 12901 | DIB1    |
| 5. 18583E-06 | 1            | 0. 285732192 | 0. 350869 | -0. 00371 | -0. 28685 | VPS45   |
| 5. 18795E-06 | 0. 283359769 | 0. 82890057  | 0. 559579 | -0. 19578 | 0. 173783 | RIM13   |
| 5. 30145E-06 | 0. 267877158 | 0. 621769539 | 0. 50105  | 0. 178691 | -0. 25567 | MP01    |
| 5. 39289E-06 | 0. 052546303 | 0. 185487468 | -0. 26804 | 0. 148677 | 0. 2547   | ATP3    |
| 5. 44052E-06 | 0. 288468769 | 0. 721271027 | 0. 36675  | -0. 12689 | -0. 15231 | IOC3    |
| 5. 5266E-06  | 1. 16401E-07 | 0. 384202197 | -0. 26047 | 0. 326433 | 0. 187115 | CTR1    |
| 5. 53415E-06 | 0. 074432949 | 1            | 0. 702501 | -0. 37093 | 0. 072707 | RTG1    |
| 5. 55963E-06 | 0. 927637885 | 0. 931005601 | 2. 050581 | -0. 11546 | -0. 39013 | HSP33   |
| 5. 673E-06   | 0. 00332216  | 0. 708167385 | -0. 35412 | 0. 278942 | 0. 153204 | SWS2    |
| 5. 706E-06   | 1            | 0. 915496392 | -2. 00031 | 0. 014925 | 0. 463051 | None    |
| 5. 75676E-06 | 0. 094685918 | 0. 623419714 | 0. 275271 | -0. 13694 | 0. 141144 | GCD11   |
| 5. 86812E-06 | 0. 835487572 | 0. 2597044   | 0. 410086 | -0. 03945 | 0. 352345 | LRS4    |
| 5. 96959E-06 | 0. 680755208 | 0. 781154036 | 0. 537257 | 0. 086102 | 0. 191852 | YHI9    |
| 5. 96959E-06 | 0. 613747706 | 1            | 0. 375608 | 0. 071185 | -0. 0287  | VPS62   |
| 6. 05556E-06 | 1            | 0. 986791239 | -0. 31206 | 0. 000444 | -0. 03751 | HSL7    |
| 6. 06689E-06 | 0. 665960377 | 1            | 0. 343878 | 0. 057257 | -0. 00622 | VMS1    |
| 6. 07929E-06 | 1            | 0. 979069474 | 0. 302483 | 0. 003957 | 0. 04004  | PEX19   |
| 6. 12789E-06 | 1            | 0. 039570187 | -0. 35721 | 0. 005236 | 0. 471349 | BMT5    |
| 6. 13972E-06 | 1            | 0. 377923962 | 0. 31966  | 0. 001832 | 0. 234175 | STM1    |
| 6. 22969E-06 | 0. 095697648 | 0. 951428598 | 0. 445881 | -0. 22249 | -0. 07555 | SMC4    |
| 6. 24846E-06 | 0. 050398477 | 0. 711541955 | -0. 33393 | 0. 18822  | 0. 143094 | BCS1    |
| 6. 28321E-06 | 0. 899105948 | 1            | -0. 55044 | 0. 037197 | 0. 014156 | ALF1    |
| 6. 31583E-06 | 0. 731503094 | 0. 373162993 | 2. 21972  | -0. 2955  | 1. 889067 | None    |
| 6. 32578E-06 | 0. 636133939 | 1            | 0. 71675  | -0. 12948 | -0. 07097 | BRN1    |
| 6. 38699E-06 | 0. 062076605 | 1            | 0. 335438 | 0. 182859 | 0. 000793 | MCP2    |
| 6. 44507E-06 | 1. 76887E-20 | 0. 771051473 | 0. 289331 | 0. 60059  | -0. 10602 | RTN2    |
| 6. 47703E-06 | 0. 529154357 | 0. 795907717 | 0. 723296 | -0. 16334 | 0. 249978 | None    |
| 6. 47785E-06 | 0. 076368853 | 0. 919516515 | 0. 313828 | -0. 16502 | 0. 065985 | GLT1    |
| 6. 48127E-06 | 0. 072476199 | 0. 535695352 | 1. 211837 | 0. 642714 | -0. 71249 | YMR206W |
| 6. 49243E-06 | 0. 352588994 | 0. 954183232 | 0. 338402 | -0. 10548 | -0. 05641 | SEC2    |
| 6. 56354E-06 | 0. 167183262 | 0. 835951015 | -0. 39959 | -0. 16904 | -0. 12187 | PIF1    |
| 6. 77302E-06 | 0. 335509445 | 0. 844390643 | -0. 77338 | 0. 243705 | -0. 22775 | RIM4    |
| 6. 77302E-06 | 0. 762268437 | 1            | 0. 77922  | 0. 098815 | 0. 068267 | SP074   |
| 7. 01966E-06 | 0. 079535843 | 0. 89826709  | 0. 258825 | -0. 13541 | 0. 061556 | SPN1    |
| 7. 02173E-06 | 0. 855463498 | 0. 945585595 | -0. 52321 | -0. 04581 | -0. 0914  | YJL193W |
| 7. 02792E-06 | 0. 533524502 | 0. 056523979 | -0. 26492 | -0. 0586  | 0. 327658 | MIS1    |
| 7. 0555E-06  | 0. 759694936 | 1            | 4. 657841 | -0. 44815 | -0. 47352 | YOL160W |
| 7. 05857E-06 | 5. 83747E-07 | 0. 236584307 | -0. 34641 | 0. 417091 | 0. 308951 | COA1    |
| 7. 09286E-06 | 0. 09236487  | 1            | 0. 463862 | -0. 23519 | 0. 037266 | SMC5    |
| 7. 17391E-06 | 0. 795533688 | 1            | -4. 77804 | -0. 35682 | 0. 369785 | None    |
| 7. 2555E-06  | 0. 920697634 | 0. 058987073 | -0. 28271 | -0. 01666 | 0. 346351 | YTM1    |
| 7. 38014E-06 | 0. 542350614 | 0. 752502722 | -0. 33216 | 0. 072398 | 0. 127706 | AL01    |
| 7. 40801E-06 | 1            | 0. 976568193 | -3. 30433 | -0. 00482 | 0. 542369 | None    |
| 7. 44769E-06 | 0. 641082995 | 0. 703292774 | 0. 438165 | -0. 07848 | -0. 19427 | UBP2    |
| 7. 60456E-06 | 1            | 0. 87592683  | 0. 346603 | -0. 00296 | -0. 09094 | CUS1    |

|              |              |              |           |           |           |         |
|--------------|--------------|--------------|-----------|-----------|-----------|---------|
| 8. 25478E-06 | 3. 01165E-05 | 0. 90423793  | -1. 01289 | 1. 043139 | 0. 231923 | GT03    |
| 8. 5495E-06  | 0. 864979821 | 0. 822329423 | 0. 956702 | 0. 082043 | 0. 308863 | ATG29   |
| 8. 60998E-06 | 0. 460298273 | 0. 167222206 | -0. 57707 | -0. 14815 | -0. 57727 | SET4    |
| 8. 61632E-06 | 0. 393339454 | 0. 040274266 | -0. 29009 | 0. 084186 | 0. 387164 | RP026   |
| 8. 68922E-06 | 0. 132253729 | 0. 008726249 | -0. 27774 | -0. 1281  | 0. 446422 | TRM2    |
| 8. 9485E-06  | 0. 826578265 | 0. 871227843 | -0. 3663  | -0. 03688 | 0. 098267 | DAP2    |
| 9. 0386E-06  | 0. 595637107 | 0. 39760733  | -0. 34483 | 0. 068561 | -0. 24841 | OPY1    |
| 9. 0386E-06  | 0. 397930773 | 0. 708809273 | 0. 280684 | 0. 081458 | 0. 124419 | ERP2    |
| 9. 12225E-06 | 0. 321967781 | 1            | -0. 30193 | 0. 099573 | 0. 019571 | PTM1    |
| 9. 16072E-06 | 0. 026572164 | 0. 817835617 | 0. 430724 | -0. 27879 | -0. 1415  | ALK1    |
| 9. 39869E-06 | 0. 007955686 | 0. 280831637 | -0. 28041 | 0. 209054 | 0. 237498 | ATP14   |
| 9. 51821E-06 | 0. 056847963 | 1            | -1. 83254 | 0. 93566  | -0. 18662 | None    |
| 9. 59468E-06 | 0. 167400799 | 0. 585629945 | 0. 339641 | 0. 146816 | 0. 189425 | MID2    |
| 9. 61749E-06 | 0. 684917892 | 0. 001551953 | -0. 66456 | -0. 10627 | 1. 233012 | SPS18   |
| 9. 6356E-06  | 0. 030221222 | 0. 522788552 | 0. 421468 | 0. 266116 | -0. 25832 | YGR201C |
| 9. 82979E-06 | 0. 055483193 | 0. 600468279 | 0. 352291 | -0. 20142 | -0. 19194 | ACF4    |
| 1. 01374E-05 | 0. 263590333 | 0. 119906082 | -0. 3132  | -0. 11517 | -0. 33933 | OCH1    |
| 1. 02301E-05 | 0. 402991749 | 0. 485259038 | -0. 35492 | -0. 10205 | -0. 22895 | AXL1    |
| 1. 02591E-05 | 0. 99746658  | 0. 889079564 | -0. 63296 | 0. 013701 | -0. 15878 | YPR196W |
| 1. 03037E-05 | 0. 076342495 | 0. 716456431 | 0. 471496 | -0. 25369 | 0. 204609 | HAL5    |
| 1. 03037E-05 | 0. 055765166 | 0. 915545807 | 0. 526503 | -0. 30148 | 0. 115876 | RAD9    |
| 1. 03968E-05 | 0. 460638341 | 1            | 0. 405122 | 0. 105898 | 0. 016354 | CRT10   |
| 1. 04514E-05 | 0. 604770313 | 0. 804576171 | 0. 439532 | -0. 08722 | -0. 14991 | YRR1    |
| 1. 04724E-05 | 0. 735543796 | 0. 328203537 | -0. 34116 | 0. 047885 | 0. 27094  | YPD1    |
| 1. 05E-05    | 0. 33363674  | 0. 865605555 | 0. 487676 | -0. 16078 | -0. 13625 | SGF73   |
| 1. 07118E-05 | 0. 637757348 | 1            | -0. 31749 | 0. 057755 | 0. 031239 | SNL1    |
| 1. 0758E-05  | 0. 938970104 | 0. 755878175 | -0. 34841 | 0. 017846 | 0. 135408 | RCL1    |
| 1. 07656E-05 | 0. 440961232 | 0. 116009386 | -0. 25035 | -0. 06741 | 0. 275064 | PXR1    |
| 1. 07731E-05 | 0. 868862376 | 0. 721655021 | 0. 371123 | 0. 03136  | -0. 15806 | SWC4    |
| 1. 08181E-05 | 0. 399977002 | 0. 918382276 | 0. 399024 | -0. 11654 | -0. 0863  | DSL1    |
| 1. 08841E-05 | 0. 009676844 | 0. 567844831 | -0. 28735 | -0. 21256 | 0. 164948 | DRS1    |
| 1. 09407E-05 | 0. 194184425 | 0. 935686072 | -0. 3862  | -0. 15953 | 0. 0732   | YSR3    |
| 1. 10228E-05 | 0. 113344883 | 0. 812812583 | 0. 802573 | -0. 39737 | 0. 270071 | SAE2    |
| 1. 10533E-05 | 0. 944196518 | 0. 803017727 | -2. 06149 | 0. 093646 | 0. 738043 | None    |
| 1. 1076E-05  | 0. 096641035 | 0. 983370642 | -0. 40746 | 0. 205199 | -0. 05306 | SPC1    |
| 1. 11083E-05 | 0. 051155386 | 0. 246416963 | -0. 40563 | 0. 233398 | 0. 362919 | MRP10   |
| 1. 11252E-05 | 0. 980380105 | 1            | 0. 510406 | -0. 0166  | 0. 050267 | CDC15   |
| 1. 11713E-05 | 0. 897637238 | 0. 868427687 | 0. 304378 | -0. 02158 | 0. 0846   | SOK1    |
| 1. 13463E-05 | 0. 261791204 | 0. 740020932 | 0. 731315 | 0. 273291 | -0. 29666 | RTC2    |
| 1. 16463E-05 | 0. 905759808 | 0. 992792463 | -0. 28987 | 0. 019459 | -0. 03416 | GZF3    |
| 1. 17318E-05 | 0. 250649618 | 0. 187679572 | -0. 60696 | 0. 227155 | -0. 58902 | YOR062C |
| 1. 17723E-05 | 0. 847371083 | 0. 011005734 | 0. 61658  | 0. 057769 | -0. 97401 | USB1    |
| 1. 18131E-05 | 0. 001677606 | 0. 043873822 | -0. 36667 | 0. 314039 | 0. 485874 | YDR391C |
| 1. 18706E-05 | 0. 736287769 | 0. 94082376  | -0. 39523 | 0. 055609 | -0. 07233 | POP7    |
| 1. 19491E-05 | 0. 00332216  | 0. 069148732 | 0. 300596 | 0. 246872 | -0. 36493 | CWP1    |
| 1. 21215E-05 | 0. 533524502 | 0. 741851259 | -0. 29763 | -0. 06747 | 0. 120647 | SEN1    |
| 1. 21246E-05 | 0. 898885595 | 0. 681411478 | 0. 518125 | 0. 036723 | -0. 24647 | VPS71   |
| 1. 24963E-05 | 0. 128591907 | 0. 944495296 | -0. 52734 | 0. 247026 | 0. 094917 | PET117  |
| 1. 2517E-05  | 0. 019167121 | 0. 804576171 | -0. 54505 | 0. 368171 | 0. 186023 | SDH6    |
| 1. 25312E-05 | 0. 026262642 | 0. 336989777 | -0. 3219  | -0. 21006 | 0. 254723 | UTP22   |
| 1. 26207E-05 | 0. 335509445 | 1            | 0. 37992  | -0. 12573 | 0. 028881 | ECM3    |
| 1. 27242E-05 | 0. 080514417 | 0. 907733056 | 0. 419484 | -0. 22508 | -0. 09699 | APL2    |
| 1. 29085E-05 | 0. 558891569 | 1            | 0. 343393 | -0. 07547 | 0. 011125 | TA03    |
| 1. 29106E-05 | 3. 06854E-05 | 0. 054247253 | -0. 36692 | 0. 392312 | 0. 469189 | CMC1    |

|              |              |              |           |           |           |         |
|--------------|--------------|--------------|-----------|-----------|-----------|---------|
| 1. 30395E-05 | 0. 397361658 | 0. 98500242  | 0. 397389 | -0. 11794 | 0. 051131 | SWI3    |
| 1. 32776E-05 | 0. 305163905 | 0. 726305499 | 0. 504599 | 0. 175646 | -0. 2147  | ATG7    |
| 1. 33319E-05 | 0. 387305876 | 0. 526082458 | 0. 746296 | 0. 225189 | -0. 46081 | ICL2    |
| 1. 34754E-05 | 0. 860955797 | 0. 94748087  | 0. 257628 | 0. 022809 | 0. 04632  | LSM1    |
| 1. 37021E-05 | 0. 125297164 | 1            | 0. 264824 | -0. 12743 | 0. 016242 | CDC12   |
| 1. 39631E-05 | 0. 140156874 | 0. 616202953 | 0. 453758 | -0. 21215 | -0. 24481 | MBP1    |
| 1. 4055E-05  | 0. 799671207 | 0. 758049402 | -0. 33783 | -0. 0383  | -0. 13228 | MSG5    |
| 1. 42441E-05 | 0. 16730854  | 1            | -0. 31408 | 0. 137307 | -0. 01054 | NCE102  |
| 1. 43328E-05 | 0. 486326234 | 0. 476983582 | 0. 540486 | 0. 136556 | -0. 36004 | GAL4    |
| 1. 43441E-05 | 0. 312951757 | 0. 95424274  | 0. 431706 | -0. 14937 | -0. 07463 | KAR3    |
| 1. 4356E-05  | 0. 782040669 | 1            | -4. 8099  | -0. 40849 | 0. 426145 | None    |
| 1. 45037E-05 | 0. 046903645 | 0. 096995994 | -0. 68173 | -0. 40569 | -0. 79258 | AAR2    |
| 1. 45037E-05 | 0. 345520596 | 0. 192775793 | -0. 32232 | 0. 104384 | 0. 3167   | RPL14B  |
| 1. 45514E-05 | 0. 758146893 | 0. 818523526 | 0. 51723  | 0. 069329 | -0. 17247 | YJL070C |
| 1. 47378E-05 | 0. 64265761  | 0. 84419011  | -0. 30552 | -0. 05587 | -0. 09387 | FUS3    |
| 1. 50102E-05 | 0. 860071452 | 0. 614405454 | -0. 29873 | -0. 02653 | 0. 161794 | SOD2    |
| 1. 5117E-05  | 0. 838648058 | 0. 882626496 | -0. 27865 | 0. 027306 | -0. 07329 | RBA50   |
| 1. 52154E-05 | 0. 591426516 | 0. 909303521 | 0. 283878 | 0. 058756 | -0. 06564 | MTR2    |
| 1. 54705E-05 | 0. 613678519 | 1            | -1. 3892  | -0. 26533 | 0. 053379 | DIT2    |
| 1. 55156E-05 | 0. 130061341 | 0. 367293941 | -0. 42689 | 0. 201844 | 0. 328513 | YAH1    |
| 1. 55546E-05 | 0. 795196386 | 0. 697639077 | 0. 473461 | 0. 055343 | -0. 22163 | OKP1    |
| 1. 5577E-05  | 0. 583819577 | 1            | -0. 34849 | -0. 07287 | 0. 000252 | NNF2    |
| 1. 59071E-05 | 0. 049421861 | 0. 154422599 | -0. 52708 | 0. 309409 | -0. 5523  | CUP2    |
| 1. 61493E-05 | 0. 276167395 | 0. 5216494   | 0. 469089 | 0. 173808 | -0. 29553 | ATG2    |
| 1. 69179E-05 | 0. 69799932  | 1            | 0. 426666 | -0. 06857 | 0. 02701  | MNR2    |
| 1. 70305E-05 | 0. 0122332   | 0. 021809306 | 0. 26055  | -0. 19274 | 0. 391688 | ERO1    |
| 1. 71715E-05 | 0. 384508616 | 1            | -0. 34201 | 0. 104126 | 0. 004112 | RSM22   |
| 1. 71774E-05 | 1            | 1            | -0. 45321 | -0. 00818 | -0. 04132 | DIA4    |
| 1. 73506E-05 | 0. 542275289 | 0. 948505707 | 0. 365439 | -0. 08376 | -0. 06617 | YLR278C |
| 1. 73579E-05 | 0. 037207475 | 0. 927845118 | -0. 31772 | 0. 198008 | 0. 065309 | UCC1    |
| 1. 74719E-05 | 0. 416507101 | 1            | 5. 231342 | -1. 36866 | -1. 51321 | None    |
| 1. 74748E-05 | 0. 002244225 | 0. 853367097 | -0. 29396 | -0. 25306 | -0. 08781 | SKG6    |
| 1. 74751E-05 | 0. 070677749 | 0. 889649609 | 0. 445344 | 0. 248143 | 0. 114423 | RMR1    |
| 1. 7576E-05  | 0. 000684897 | 0. 044540629 | -0. 22276 | 0. 206871 | 0. 300733 | ATP2    |
| 1. 78444E-05 | 0. 455815867 | 0. 197874004 | -0. 31522 | 0. 084462 | 0. 31094  | APT1    |
| 1. 78877E-05 | 0. 196724669 | 0. 939670905 | -0. 26158 | -0. 11019 | 0. 049202 | MRS6    |
| 1. 80114E-05 | 0. 340284679 | 0. 929303164 | 0. 331199 | 0. 110217 | -0. 06794 | TPS3    |
| 1. 8032E-05  | 0. 711405843 | 0. 875200775 | 0. 354909 | -0. 05546 | 0. 097646 | YPL088W |
| 1. 83513E-05 | 0. 820407495 | 0. 875200775 | -0. 36734 | -0. 03925 | -0. 10064 | COM2    |
| 1. 87946E-05 | 0. 032155503 | 0. 943528578 | 0. 360947 | -0. 2342  | -0. 06707 | TOS4    |
| 1. 90724E-05 | 0. 0122332   | 0. 378603211 | 0. 372791 | -0. 27767 | -0. 28641 | VTC5    |
| 1. 90724E-05 | 0. 968013408 | 0. 743726892 | 0. 49034  | -0. 01947 | -0. 20268 | YHR131C |
| 1. 91168E-05 | 0. 692723579 | 0. 021370619 | -0. 28709 | 0. 04659  | 0. 433225 | TAN1    |
| 1. 9547E-05  | 0. 995919167 | 0. 710318897 | -3. 66073 | 0. 065447 | -2. 00911 | YFL064C |
| 2. 01204E-05 | 0. 712206218 | 0. 962684605 | -0. 35108 | 0. 054507 | 0. 058021 | COX11   |
| 2. 04816E-05 | 0. 0122332   | 9. 20876E-05 | 0. 41268  | 0. 305969 | -0. 91038 | TMC1    |
| 2. 06179E-05 | 0. 877996534 | 0. 05801516  | 0. 293825 | -0. 02463 | 0. 382164 | NOP13   |
| 2. 06179E-05 | 0. 981817797 | 0. 419798397 | -0. 34099 | -0. 01104 | 0. 247944 | BCD1    |
| 2. 07646E-05 | 0. 355434025 | 0. 617460449 | -0. 24685 | 0. 080183 | 0. 134852 | SEC53   |
| 2. 09882E-05 | 0. 896286063 | 0. 996250082 | -0. 28416 | 0. 020823 | -0. 03316 | GCN3    |
| 2. 11389E-05 | 0. 700418476 | 0. 904680493 | 1. 753098 | -0. 2857  | 0. 427664 | NDJ1    |
| 2. 14545E-05 | 0. 795533688 | 0. 438612707 | 0. 582564 | -0. 06913 | -0. 41656 | CLB6    |
| 2. 14885E-05 | 0. 910359943 | 0. 241434728 | -0. 27018 | -0. 01807 | 0. 252455 | MIC60   |
| 2. 14885E-05 | 0. 321967781 | 1            | 0. 255888 | -0. 08869 | 0. 021844 | KAP104  |

|              |              |              |           |           |           |           |
|--------------|--------------|--------------|-----------|-----------|-----------|-----------|
| 2. 17739E-05 | 0. 627561248 | 0. 501759351 | 0. 391683 | 0. 076218 | 0. 257946 | HAP4      |
| 2. 18896E-05 | 0. 001674292 | 0. 990299674 | -2. 39008 | 1. 884231 | -0. 51878 | DAL80     |
| 2. 19224E-05 | 0. 347668023 | 0. 641769073 | -0. 90672 | -0. 29702 | 0. 48124  | None      |
| 2. 21978E-05 | 1            | 0. 973674102 | -0. 53807 | -0. 00265 | 0. 080404 | YPL108W   |
| 2. 22479E-05 | 0. 001307365 | 0. 112076435 | -0. 25397 | 0. 22888  | 0. 291207 | TUF1      |
| 2. 25755E-05 | 0. 02963386  | 0. 075616863 | -0. 62245 | 0. 405063 | 0. 764134 | ATX1      |
| 2. 27047E-05 | 1            | 1            | 0. 264636 | -0. 00523 | -0. 02296 | HRI1      |
| 2. 30511E-05 | 0. 143341906 | 1            | 0. 391521 | -0. 18643 | 0. 021132 | SWI6      |
| 2. 31355E-05 | 0. 806893372 | 0. 924605282 | -0. 28217 | 0. 031824 | 0. 060559 | RRT2      |
| 2. 32217E-05 | 0. 370406831 | 0. 068005273 | -0. 28202 | -0. 08992 | 0. 355723 | NOP53     |
| 2. 32876E-05 | 0. 296901865 | 0. 889079564 | 0. 34526  | 0. 125118 | -0. 09072 | YDR476C   |
| 2. 34369E-05 | 0. 460638341 | 0. 390677789 | -0. 30931 | -0. 08354 | -0. 23513 | MET4      |
| 2. 34843E-05 | 0. 209965516 | 0. 020319939 | 0. 314032 | 0. 131331 | -0. 48074 | YAP1801   |
| 2. 38658E-05 | 0. 613304251 | 0. 744307428 | 0. 400771 | 0. 081162 | -0. 16724 | YIL152W   |
| 2. 3883E-05  | 0. 439851325 | 0. 937984736 | -0. 32122 | 0. 089993 | -0. 06162 | HTZ1      |
| 2. 42298E-05 | 0. 968013408 | 0. 737036218 | -1. 47324 | 0. 056066 | -0. 66432 | None      |
| 2. 49031E-05 | 0. 086191139 | 1            | 0. 285723 | -0. 15564 | -0. 02751 | SYH1      |
| 2. 56448E-05 | 0. 910392982 | 0. 886876142 | 0. 411698 | -0. 02797 | -0. 11014 | PAN3      |
| 2. 57026E-05 | 0. 885372644 | 0. 46824606  | -0. 30442 | 0. 024377 | 0. 211028 | IPI1      |
| 2. 57109E-05 | 0. 170043734 | 0. 967394603 | 0. 560507 | -0. 25447 | 0. 090918 | RAD26     |
| 2. 59273E-05 | 0. 776193997 | 0. 711541955 | 0. 555302 | -0. 07116 | 0. 256194 | SL01      |
| 2. 64E-05    | 0. 202764822 | 1            | -4. 54766 | 1. 316302 | -1. 37551 | YLR157W-I |
| 2. 64628E-05 | 0. 265919992 | 1            | -1. 50244 | 0. 550031 | 0. 030266 | ERR3      |
| 2. 65461E-05 | 0. 125719569 | 0. 97750026  | 0. 372853 | 0. 18464  | -0. 05404 | STE50     |
| 2. 65596E-05 | 0. 954336914 | 1            | 0. 320287 | 0. 01481  | -0. 01625 | UBC7      |
| 2. 68074E-05 | 0. 126331092 | 0. 385959394 | 0. 323064 | 0. 159789 | -0. 24896 | BXI1      |
| 2. 71949E-05 | 0. 154663593 | 0. 759373966 | -0. 78381 | 0. 359394 | 0. 314239 | OAR1      |
| 2. 73581E-05 | 0. 006993128 | 0. 079491698 | -0. 262   | -0. 20928 | 0. 323674 | TPA1      |
| 2. 75314E-05 | 0. 222579714 | 0. 817868751 | -0. 27522 | -0. 11327 | -0. 09463 | SVS1      |
| 2. 77157E-05 | 0. 388076484 | 0. 562048326 | -0. 69282 | 0. 212537 | 0. 418989 | SUL1      |
| 2. 78395E-05 | 0. 28254384  | 0. 491045055 | 0. 466548 | -0. 17674 | -0. 31539 | SMP1      |
| 2. 87066E-05 | 0. 223628637 | 0. 972387712 | -0. 45412 | -0. 18663 | 0. 069501 | NTE1      |
| 2. 88608E-05 | 0. 138144089 | 0. 702041373 | 2. 73577  | -1. 28058 | -1. 69526 | YRF1-7    |
| 2. 90117E-05 | 0. 000190923 | 1            | 4. 581553 | 4. 640587 | 5. 609004 | COX3      |
| 2. 90583E-05 | 0. 762964507 | 0. 439177977 | 0. 395445 | 0. 053359 | -0. 28673 | SLD5      |
| 2. 90583E-05 | 0. 767459399 | 0. 558164588 | -0. 25876 | 0. 033998 | 0. 158402 | MEU1      |
| 2. 90583E-05 | 0. 159373293 | 0. 761176355 | 0. 432154 | 0. 200758 | -0. 17457 | PEP7      |
| 2. 90583E-05 | 0. 54489641  | 1            | 0. 500313 | -0. 11717 | -0. 0277  | SEG2      |
| 2. 94013E-05 | 1            | 0. 749124796 | -0. 32981 | 0. 003474 | 0. 136627 | PUF4      |
| 2. 95316E-05 | 0. 834640482 | 0. 689558052 | 0. 280515 | 0. 029192 | -0. 13752 | AGE2      |
| 2. 96512E-05 | 0. 893976085 | 0. 178503269 | 1. 412894 | -0. 10957 | -1. 50954 | None      |
| 3. 00846E-05 | 0. 031788614 | 0. 786892522 | 0. 34458  | -0. 22949 | -0. 13044 | DUG2      |
| 3. 00984E-05 | 0. 47612507  | 1            | 0. 425862 | 0. 113796 | -0. 02994 | MED11     |
| 3. 09264E-05 | 0. 269333208 | 0. 143940462 | 0. 264598 | 0. 102084 | 0. 293143 | MGE1      |
| 3. 14137E-05 | 0. 079535843 | 0. 847404354 | -0. 26075 | -0. 14571 | 0. 081827 | ACC1      |
| 3. 1645E-05  | 0. 398707313 | 0. 708493888 | -2. 61621 | 0. 664009 | 1. 368774 | None      |
| 3. 16695E-05 | 0. 206911234 | 1            | -0. 27411 | 0. 116334 | 0. 021556 | MGM101    |
| 3. 21091E-05 | 0. 841225558 | 0. 742768539 | 0. 639885 | -0. 06516 | -0. 27246 | HXT5      |
| 3. 24551E-05 | 0. 832102442 | 0. 659843375 | -0. 4318  | 0. 045144 | -0. 22506 | YDL180W   |
| 3. 26122E-05 | 0. 501017244 | 0. 915496392 | -0. 26188 | -0. 06639 | 0. 060744 | UTP15     |
| 3. 26122E-05 | 0. 940649911 | 1            | -0. 47887 | 0. 025323 | 0. 017569 | LIH1      |
| 3. 27283E-05 | 0. 203402724 | 0. 922669797 | -0. 48377 | -0. 20712 | 0. 10747  | RRP17     |
| 3. 28102E-05 | 0. 619450596 | 0. 522217116 | -1. 98141 | -0. 37921 | -1. 41082 | SPR2      |
| 3. 31779E-05 | 0. 509317322 | 0. 98500242  | 0. 422563 | -0. 10656 | -0. 05665 | SGS1      |



|              |              |              |           |           |                   |                   |
|--------------|--------------|--------------|-----------|-----------|-------------------|-------------------|
| 3. 38946E-05 | 0. 709900242 | 0. 376455642 | 0. 339509 | -0. 05497 | -0. 26927         | VPS5              |
| 3. 40678E-05 | 0. 295390559 | 0. 927963214 | -0. 37922 | 0. 139567 | 0. 080481         | CLG1              |
| 3. 46228E-05 | 0. 295659    | 0. 563376575 | -2. 24172 | 0. 758612 | 1. 444533         | None              |
| 3. 48836E-05 | 5. 76932E-06 | 0. 868996053 | -0. 30727 | 0. 368827 | 0. 089272         | MRP49             |
| 3. 51256E-05 | 0. 865084571 | 0. 592065914 | -0. 35756 | -0. 03237 | 0. 20937          | ASF1              |
| 3. 57078E-05 | 0. 420761548 | 0. 8483833   | -0. 39268 | -0. 11623 | 0. 123304         | HLR1              |
| 3. 57765E-05 | 0. 097990915 | 0. 169011865 | 0. 631579 | 0. 339427 | -0. 67127         | YNL018C           |
| 3. 58281E-05 | 0. 773263368 | 0. 062663543 | -0. 44283 | 0. 057462 | -0. 57686         | RAD17             |
| 3. 59719E-05 | 0. 905759808 | 0. 073415554 | -0. 44555 | 0. 031296 | -0. 55989         | TP04              |
| 3. 60591E-05 | 0. 820966378 | 0. 568843524 | -1. 17837 | 0. 126904 | 0. 717462         | ARR2              |
| 3. 61621E-05 | 0. 231604832 | 0. 786137812 | 0. 444076 | -0. 18449 | -0. 17058         | YPT11             |
| 3. 63174E-05 | 0. 678331025 | 0. 801754205 | -0. 35164 | 0. 061156 | 0. 128217         | RER1              |
| 3. 65929E-05 | 0. 382913033 | 0. 56134476  | -0. 79292 | -0. 25083 | 0. 497046         | SPS19             |
| 3. 67235E-05 | 0. 111956571 | 0. 891157181 | -2. 89532 | -1. 31562 | 1. 164243         | YAR066W           |
| 3. 6872E-05  | 0. 526984154 | 0. 72738114  | -0. 31686 | -0. 07699 | 0. 141249         | TMA23             |
| 3. 69754E-05 | 0. 622084537 | 0. 87592683  | 0. 435474 | -0. 08824 | 0. 123218         | IRC8              |
| 3. 71394E-05 | 0. 806085641 | 0. 041689887 | 0. 427225 | -0. 05008 | -0. 60715         | RRD2              |
| 3. 71835E-05 | 0. 266929182 | 0. 202387133 | 0. 37655  | -0. 14798 | 0. 384987         | CLB2              |
| 3. 81195E-05 | 0. 133002584 | 0. 967394603 | -0. 3379  | -0. 16734 | -0. 05594         | BMT6              |
| 3. 85213E-05 | 0. 003939254 | 1 4. 435893  | -4. 1407  | -5. 37821 | YPR202W           |                   |
| 3. 85785E-05 | 0. 36891213  | 0. 705564376 | 0. 350389 | -0. 11585 | -0. 16777         | COG4              |
| 3. 86282E-05 | 0. 080514417 | 0. 446640364 | 0. 449985 | -0. 25559 | -0. 32785         | ATG13             |
| 3. 88883E-05 | 0. 621279638 | 0. 499488496 | -1. 71965 | -0. 334   | -1. 2548          | YCR085W           |
| 3. 92882E-05 | 0. 647503232 | 0. 736753793 | 0. 259101 | 0. 049515 | 0. 113631         | TOA1              |
| 3. 95346E-05 | 0. 929392974 | 0. 713395097 | -0. 28288 | -0. 01695 | 0. 131805         | BRE4              |
| 3. 95481E-05 | 0. 601349273 | 0. 581522652 | -0. 46039 | 0. 096932 | 0. 275291         | OST4              |
| 3. 97452E-05 | 0. 564303748 | 0. 905370228 | 0. 293    | 0. 067277 | -0. 07269         | HIS3              |
| 3. 98037E-05 | 0. 030733392 | 0. 570313772 | -0. 98194 | 0. 646874 | 0. 593282         | PRM2              |
| 3. 9997E-05  | 0. 00028014  | 0. 630792731 | -0. 3422  | 0. 347819 | 0. 189075         | MRPL27            |
| 4. 00701E-05 | 0. 058451856 | 0. 8119342   | 0. 300008 | -0. 18166 | -0. 10759         | TDA7              |
| 4. 01763E-05 | 0. 665960377 | 1 0. 470429  | 0. 085897 | 0. 021771 | TDA2              |                   |
| 4. 02253E-05 | 0. 091562555 | 0. 013045788 | -0. 34864 | 0. 19008  | 0. 578961         | RPL37A            |
| 4. 02327E-05 | 0. 746350726 | 0. 659101564 | -0. 27604 | 0. 040227 | 0. 146175         | SKG1              |
| 4. 13519E-05 | 0. 591976174 | 1 -1. 12992  | 0. 238024 | 0. 030361 | YLR285C- <i>l</i> |                   |
| 4. 16111E-05 | 0. 468941828 | 0. 834791774 | -0. 40962 | 0. 111907 | 0. 13741          | YJR112W- <i>l</i> |
| 4. 19566E-05 | 0. 676177191 | 0. 900882736 | 0. 263036 | -0. 04683 | 0. 067605         | GPI16             |
| 4. 2135E-05  | 0. 855524783 | 0. 670242692 | -0. 36328 | 0. 034745 | 0. 187981         | YCR090C           |
| 4. 21662E-05 | 0. 700788611 | 0. 677620076 | 0. 274303 | 0. 045824 | -0. 14014         | YRB2              |
| 4. 25831E-05 | 0. 760915703 | 0. 262505363 | -0. 45072 | 0. 062087 | 0. 422613         | CNL1              |
| 4. 26996E-05 | 0. 897122859 | 0. 060300641 | 0. 310073 | 0. 023628 | -0. 41232         | HSE1              |
| 4. 32961E-05 | 0. 037161407 | 0. 910496008 | 0. 323517 | -0. 21381 | 0. 078438         | SEC24             |
| 4. 34195E-05 | 0. 407136042 | 0. 507578381 | 0. 292576 | -0. 09052 | 0. 198049         | DUS3              |
| 4. 42111E-05 | 0. 75339767  | 0. 92806956  | 0. 245206 | 0. 035274 | -0. 05295         | PRE7              |
| 4. 4425E-05  | 0. 740307204 | 0. 378557332 | 1. 052907 | -0. 16009 | -0. 85311         | None              |
| 4. 44336E-05 | 0. 552553606 | 0. 643429399 | -0. 23933 | -0. 05617 | 0. 130657         | SWP1              |
| 4. 45394E-05 | 0. 004780956 | 0. 21536472  | -0. 3398  | 0. 286222 | 0. 341968         | TIM11             |
| 4. 49244E-05 | 0. 269333208 | 1 -4. 47193  | 1. 205944 | -1. 26202 | GEX2              |                   |
| 4. 59193E-05 | 0. 583819577 | 1 0. 368236  | -0. 08207 | 0. 042701 | EP01              |                   |
| 4. 60285E-05 | 0. 038719477 | 1 0. 328485  | -0. 21662 | -0. 02921 | FLC3              |                   |
| 4. 64264E-05 | 1            | 0. 803025975 | -0. 26907 | 0. 003346 | 0. 098999         | KRE1              |
| 4. 695E-05   | 0. 954188947 | 0. 915496392 | -0. 58542 | -0. 02772 | -0. 13862         | THI22             |
| 4. 7166E-05  | 4. 53297E-09 | 0. 136494495 | -0. 23895 | 0. 362123 | 0. 272746         | ADH4              |
| 4. 73763E-05 | 0. 920697634 | 0. 908854398 | -0. 35439 | 0. 022887 | 0. 08678          | TAD1              |
| 4. 74811E-05 | 0. 021955716 | 0. 203504846 | -0. 64128 | 0. 453448 | 0. 656083         | XYL2              |

|              |              |              |           |           |           |         |
|--------------|--------------|--------------|-----------|-----------|-----------|---------|
| 4. 80109E-05 | 0. 000213631 | 0. 119906082 | -0. 43459 | 0. 451616 | 0. 509081 | COX17   |
| 4. 8685E-05  | 0. 646727695 | 1            | -0. 32819 | -0. 06317 | -0. 02551 | PER33   |
| 4. 86934E-05 | 0. 837624198 | 0. 530280555 | -0. 54649 | -0. 0569  | -0. 35835 | FIG4    |
| 4. 87031E-05 | 0. 660417863 | 0. 226565606 | 0. 255578 | 0. 047845 | -0. 2545  | LSB5    |
| 4. 87923E-05 | 0. 700788611 | 0. 907320483 | 0. 385502 | -0. 06507 | 0. 095642 | SQS1    |
| 4. 88924E-05 | 0. 699326009 | 0. 106061312 | 0. 699939 | -0. 11928 | -0. 84306 | MCM10   |
| 4. 93604E-05 | 0. 466557694 | 0. 005401573 | -0. 33158 | -0. 09213 | 0. 607338 | DHR2    |
| 4. 93787E-05 | 0. 101928042 | 1            | 0. 545298 | 0. 295082 | -0. 04849 | GSM1    |
| 4. 93787E-05 | 0. 342526061 | 1            | -1. 15291 | -0. 39585 | 0. 063833 | TEP1    |
| 4. 95313E-05 | 0. 386627735 | 0. 878688605 | 0. 544051 | 0. 17563  | 0. 154816 | ITT1    |
| 4. 96098E-05 | 1. 05959E-06 | 0. 652552516 | -0. 29703 | 0. 386337 | 0. 160363 | MRPL10  |
| 4. 96098E-05 | 0. 725013125 | 1            | 0. 270313 | 0. 042736 | -0. 02231 | RPN9    |
| 5. 01349E-05 | 0. 001731932 | 1            | 0. 544917 | -0. 51054 | -0. 039   | SPT5    |
| 5. 01611E-05 | 0. 557460822 | 0. 28665746  | -0. 22616 | -0. 05304 | 0. 206088 | MNN10   |
| 5. 04407E-05 | 0. 193877369 | 0. 000749239 | -0. 23053 | -0. 10306 | 0. 486167 | RPF1    |
| 5. 08932E-05 | 0. 125946646 | 0. 125525495 | -0. 3348  | 0. 170144 | 0. 390316 | YNL122C |
| 5. 18825E-05 | 0. 843151545 | 0. 929344228 | 0. 265691 | 0. 027192 | 0. 057206 | PRE9    |
| 5. 23403E-05 | 0. 516700017 | 1            | 0. 422307 | -0. 10745 | 0. 037569 | SWR1    |
| 5. 24976E-05 | 0. 528882079 | 0. 951213999 | -0. 99614 | 0. 239457 | 0. 188274 | ADY2    |
| 5. 27321E-05 | 0. 450549647 | 0. 947971364 | 0. 315904 | -0. 09118 | -0. 0607  | SEC18   |
| 5. 28806E-05 | 0. 416010682 | 0. 98500242  | 0. 365777 | -0. 11243 | -0. 05045 | TIP20   |
| 5. 36566E-05 | 0. 658210054 | 1            | -0. 31629 | -0. 05958 | -0. 02336 | PHS1    |
| 5. 40915E-05 | 0. 010256893 | 0. 863490318 | -0. 42491 | -0. 33894 | 0. 129632 | SDD4    |
| 5. 41159E-05 | 0. 113100688 | 0. 131907273 | 0. 274155 | 0. 145339 | -0. 31766 | YAP1802 |
| 5. 41209E-05 | 0. 709900242 | 1            | 0. 30375  | 0. 050349 | 0. 008814 | END3    |
| 5. 4426E-05  | 0. 013199729 | 0. 715152314 | 0. 428476 | -0. 33311 | 0. 203314 | TIF4631 |
| 5. 51692E-05 | 0. 842773453 | 0. 711541955 | 0. 296103 | -0. 03063 | 0. 141974 | YML096W |
| 5. 56263E-05 | 0. 029490195 | 0. 771051473 | 0. 295702 | 0. 204997 | -0. 12068 | RIM11   |
| 5. 58165E-05 | 0. 529464272 | 1            | 0. 391108 | -0. 09745 | 0. 035417 | SAP155  |
| 5. 68967E-05 | 0. 274405007 | 0. 509579361 | 0. 476564 | -0. 18966 | -0. 32536 | PEA2    |
| 5. 79844E-05 | 0. 099649048 | 1            | 0. 360119 | -0. 19827 | -0. 00058 | CHS2    |
| 5. 81692E-05 | 0. 84140879  | 0. 043538983 | -0. 49811 | 0. 051417 | -0. 70799 | ICT1    |
| 5. 88414E-05 | 0. 044150726 | 0. 000115519 | -0. 33742 | 0. 217531 | 0. 786369 | RPS30A  |
| 6. 13673E-05 | 0. 85453023  | 0. 719739519 | -0. 9056  | 0. 087951 | -0. 42273 | NAT4    |
| 6. 15911E-05 | 0. 877653097 | 0. 244196805 | 0. 314918 | -0. 0281  | -0. 30933 | HRD1    |
| 6. 17877E-05 | 0. 001527386 | 0. 786584362 | -0. 29143 | -0. 27551 | 0. 114398 | ERC1    |
| 6. 20711E-05 | 1. 55085E-09 | 0. 616944383 | -0. 60124 | 0. 935835 | -0. 346   | YGR066C |
| 6. 22593E-05 | 0. 289155055 | 0. 665743457 | 0. 37461  | -0. 14603 | -0. 20088 | DUN1    |
| 6. 22593E-05 | 0. 027086984 | 0. 772424036 | -0. 28985 | -0. 20444 | 0. 118311 | NUP170  |
| 6. 24986E-05 | 0. 762964507 | 0. 781154036 | -0. 43706 | -0. 06085 | 0. 17469  | CWC22   |
| 6. 38197E-05 | 0. 11971678  | 0. 594195804 | 0. 428454 | -0. 22707 | -0. 25898 | PHO2    |
| 6. 38455E-05 | 0. 408733697 | 1            | 0. 332596 | 0. 104686 | -0. 02974 | VPS51   |
| 6. 45957E-05 | 0. 940918832 | 0. 000551855 | -0. 2205  | 0. 012101 | 0. 47944  | NMD3    |
| 6. 49236E-05 | 0. 882399123 | 0. 786584362 | 0. 374597 | -0. 03269 | -0. 14787 | TC089   |
| 6. 51112E-05 | 0. 048714737 | 1            | 0. 252794 | -0. 16298 | 0. 019122 | ENT1    |
| 6. 5846E-05  | 0. 166666159 | 0. 978193638 | 0. 322461 | -0. 15467 | 0. 048773 | SED4    |
| 6. 61633E-05 | 0. 049774859 | 0. 723935587 | 0. 255177 | 0. 163312 | 0. 118704 | SMT3    |
| 6. 661E-05   | 1            | 0. 90423793  | -0. 26062 | -0. 0011  | 0. 067295 | ROT1    |
| 6. 74029E-05 | 0. 162783034 | 1            | 0. 288855 | -0. 13967 | 0. 005381 | EDC3    |
| 6. 79262E-05 | 0. 519321422 | 0. 897848413 | 0. 357855 | -0. 09181 | -0. 09568 | VPS54   |
| 6. 79486E-05 | 0. 640053214 | 0. 059418296 | -0. 35603 | -0. 07084 | -0. 4855  | FD01    |
| 6. 87588E-05 | 0. 444456702 | 0. 217184527 | 0. 303414 | 0. 089719 | -0. 31249 | TRP4    |
| 6. 87911E-05 | 0. 21659995  | 0. 883095126 | 0. 389199 | -0. 17127 | -0. 11106 | YTA6    |
| 6. 89393E-05 | 0. 440961232 | 0. 771931968 | 0. 388086 | -0. 11599 | 0. 160332 | SRB4    |

|              |              |              |           |           |           |         |
|--------------|--------------|--------------|-----------|-----------|-----------|---------|
| 6. 91573E-05 | 0. 08272612  | 0. 328203537 | -0. 40037 | 0. 229755 | 0. 349982 | SRB7    |
| 6. 96161E-05 | 0. 001784516 | 0. 223097491 | 0. 291737 | -0. 27655 | -0. 29847 | YOL019W |
| 7. 04584E-05 | 0. 652629347 | 0. 919926509 | -0. 34009 | 0. 065765 | 0. 079293 | PPH3    |
| 7. 04802E-05 | 0. 013695435 | 0. 962355326 | -0. 62463 | 0. 477858 | 0. 110998 | GAS2    |
| 7. 11529E-05 | 0. 890649696 | 0. 537223328 | -0. 2832  | -0. 02305 | -0. 18725 | PSD1    |
| 7. 1268E-05  | 0. 996753756 | 0. 622534051 | 0. 306834 | 0. 007662 | -0. 17826 | RME1    |
| 7. 20563E-05 | 0. 867488635 | 0. 506928274 | 0. 473147 | -0. 04447 | -0. 32934 | YOR292C |
| 7. 33221E-05 | 0. 851320842 | 0. 803017727 | 0. 369106 | 0. 037356 | -0. 13979 | IMP2'   |
| 7. 33434E-05 | 0. 127578663 | 0. 00166885  | -0. 30614 | -0. 15892 | 0. 62403  | UTP20   |
| 7. 3502E-05  | 0. 512975922 | 1            | -4. 49391 | -0. 84859 | 0. 889266 | YLR464W |
| 7. 44518E-05 | 0. 156469754 | 0. 025085508 | -0. 25009 | -0. 12256 | 0. 397219 | IMP4    |
| 7. 49667E-05 | 0. 346555952 | 1            | -0. 34845 | -0. 1231  | -0. 00743 | PMT7    |
| 7. 56141E-05 | 0. 571690974 | 0. 962371769 | -0. 37841 | 0. 087762 | -0. 06747 | SGF11   |
| 7. 6269E-05  | 0. 860071452 | 0. 90453709  | 0. 287823 | 0. 028063 | 0. 075019 | RFC2    |
| 7. 67491E-05 | 0. 032544156 | 0. 282780148 | -0. 29755 | 0. 204895 | 0. 27986  | MRPL50  |
| 7. 78857E-05 | 0. 464410394 | 0. 847404354 | -0. 27982 | -0. 07999 | 0. 092158 | SRP40   |
| 7. 80678E-05 | 0. 086191139 | 0. 538039737 | -0. 36469 | 0. 208819 | 0. 242299 | CUE4    |
| 7. 90971E-05 | 0. 171035344 | 0. 427445927 | 0. 252563 | -0. 12114 | 0. 19674  | MKC7    |
| 7. 91859E-05 | 0. 384327883 | 0. 017068248 | -0. 39284 | 0. 129803 | 0. 657845 | ECM1    |
| 7. 97635E-05 | 0. 371129486 | 0. 903248727 | -0. 46455 | 0. 15721  | -0. 12133 | MT01    |
| 8. 02776E-05 | 0. 688973799 | 0. 214464369 | -1. 89408 | -0. 30995 | 2. 164303 | None    |
| 8. 08008E-05 | 0. 138509482 | 0. 069129419 | -1. 71672 | 0. 802196 | 2. 724821 | YBL044W |
| 8. 08496E-05 | 0. 631219113 | 0. 769354841 | 1. 240344 | 0. 257564 | -0. 52018 | PAU5    |
| 8. 09892E-05 | 0. 062184314 | 1            | 0. 269204 | -0. 16721 | -0. 00793 | NUP60   |
| 8. 09892E-05 | 0. 829983598 | 1            | 0. 339828 | -0. 03815 | 0. 008505 | RIM20   |
| 8. 19297E-05 | 0. 617873557 | 0. 378557332 | 0. 250192 | 0. 053311 | 0. 208445 | RPL18A  |
| 8. 19297E-05 | 0. 206402515 | 0. 532461006 | -0. 28906 | -0. 12969 | 0. 194785 | RSA4    |
| 8. 20013E-05 | 0. 35578661  | 1            | 0. 422644 | -0. 14904 | 0. 010819 | SNT1    |
| 8. 26336E-05 | 0. 985451395 | 0. 513475116 | 0. 342725 | -0. 0113  | -0. 23787 | ISY1    |
| 8. 31295E-05 | 0. 640183171 | 0. 529437087 | -0. 26404 | -0. 05316 | 0. 179032 | SQT1    |
| 8. 36843E-05 | 0. 776818407 | 0. 976568193 | -0. 30612 | 0. 041188 | -0. 04753 | NCR1    |
| 8. 51021E-05 | 0. 219208972 | 0. 848379499 | 0. 265345 | -0. 11742 | -0. 0878  | SHE10   |
| 8. 64995E-05 | 1            | 1            | -0. 3382  | 0. 000546 | -0. 03349 | NSE5    |
| 8. 72545E-05 | 0. 033215596 | 0. 967394603 | 0. 346125 | -0. 24238 | -0. 06026 | LCB4    |
| 8. 8611E-05  | 0. 901660388 | 0. 032905196 | -0. 2548  | 0. 019495 | 0. 393833 | NSR1    |
| 8. 89548E-05 | 0. 298926458 | 1            | 0. 428954 | -0. 16736 | -0. 01746 | PEP5    |
| 8. 9589E-05  | 0. 738978817 | 0. 237658563 | 0. 350693 | -0. 05498 | -0. 35639 | CKI1    |
| 8. 98364E-05 | 0. 535888712 | 0. 539256261 | -0. 26123 | -0. 06553 | -0. 1744  | DPL1    |
| 9. 01982E-05 | 1            | 0. 318881364 | -0. 25384 | 0. 003536 | 0. 229353 | MRN1    |
| 9. 06588E-05 | 0. 301940839 | 0. 063075209 | 0. 299867 | -0. 1165  | -0. 41291 | SLX5    |
| 9. 08012E-05 | 0. 759733432 | 1            | -0. 54594 | 0. 078594 | -0. 00215 | CRG1    |
| 9. 09616E-05 | 0. 99746658  | 0. 885798515 | -0. 27158 | 0. 006649 | -0. 07783 | MRS3    |
| 9. 13664E-05 | 0. 490088889 | 0. 723053672 | -0. 27718 | 0. 075849 | 0. 131096 | YBR053C |
| 9. 22611E-05 | 0. 375026386 | 0. 304859152 | -0. 34312 | -0. 11682 | 0. 315701 | TRM732  |
| 9. 22662E-05 | 1            | 0. 939670905 | 0. 322338 | -0. 00594 | -0. 06645 | TIP41   |
| 9. 35818E-05 | 1            | 1            | 0. 348237 | 0. 00679  | 0. 010888 | YIL067C |
| 9. 5975E-05  | 0. 444779801 | 1            | -0. 50204 | 0. 149444 | 0. 022504 | YBL059W |
| 9. 68441E-05 | 0. 753616142 | 0. 215961573 | -0. 29782 | 0. 044366 | -0. 31232 | YNL115C |
| 9. 83649E-05 | 0. 661521318 | 0. 283510967 | -0. 42581 | 0. 082002 | -0. 40338 | FYV6    |
| 9. 87571E-05 | 0. 963895677 | 0. 962145993 | -0. 29674 | 0. 013309 | -0. 05412 | YMD8    |
| 9. 88388E-05 | 0. 697921391 | 0. 221570136 | -0. 26169 | -0. 04594 | 0. 273795 | TRM8    |
| 9. 91647E-05 | 0. 920741029 | 0. 915496392 | 0. 269345 | -0. 01826 | 0. 066807 | PBR1    |
| 0. 000100663 | 0. 587866346 | 0. 081922572 | -0. 43175 | -0. 09875 | -0. 5677  | NSL1    |
| 0. 000101657 | 1            | 0. 74594446  | -0. 97612 | -0. 01915 | 0. 439352 | ARP10   |

|             |             |             |          |          |          |                   |
|-------------|-------------|-------------|----------|----------|----------|-------------------|
| 0.00010229  | 0.055381621 | 0.123468015 | 0.948382 | 0.609673 | -1.14493 | BAG7              |
| 0.000103679 | 0.781305378 | 0.099020366 | -0.26496 | -0.03571 | -0.33693 | FET4              |
| 0.000105383 | 0.179113779 | 0.384604173 | 1.248383 | 0.595764 | -1.06788 | YNL277W- <i>l</i> |
| 0.000106814 | 0.070226111 | 0.781154036 | -0.45871 | 0.278689 | 0.18844  | ELC1              |
| 0.000107153 | 0.703189392 | 0.530625906 | 0.647579 | -0.114   | -0.44409 | RRI2              |
| 0.000108204 | 0.963749362 | 0.569177865 | -0.70249 | 0.031475 | -0.45611 | RRG8              |
| 0.000108377 | 0.001489983 | 0.554003774 | -0.3797  | 0.368126 | 0.250732 | MIM2              |
| 0.000109776 | 0.361924883 | 0.804939823 | -0.49689 | 0.173856 | -0.19037 | YJL118W           |
| 0.000110669 | 0.054782399 | 0.996250082 | -0.31639 | 0.203014 | -0.04036 | AIM25             |
| 0.000112341 | 0.675724591 | 1           | -0.30638 | -0.05733 | 0.017844 | RRN7              |
| 0.000112369 | 0.101132655 | 0.214508513 | 0.483883 | 0.274614 | -0.51345 | GLG1              |
| 0.000112866 | 0.039547582 | 0.878688605 | 0.29246  | -0.20202 | -0.08722 | CDC9              |
| 0.000113657 | 0.98811108  | 0.636714322 | 3.458176 | 0.0879   | -2.03015 | YER189W           |
| 0.000115303 | 0.088953553 | 0.533231335 | -0.38729 | 0.225255 | 0.265253 | BSC2              |
| 0.000115432 | 0.360240483 | 0.029665642 | -0.27179 | 0.096139 | 0.432722 | RPL27B            |
| 0.000115973 | 0.75340855  | 0.535269963 | -0.25103 | -0.03792 | 0.17177  | CBR1              |
| 0.000117625 | 0.758146893 | 1           | 0.251424 | 0.037583 | -0.02397 | CAP2              |
| 0.000118088 | 0.88355725  | 0.555522959 | -0.38647 | 0.034368 | -0.25586 | ADA2              |
| 0.000118248 | 0.062193215 | 1           | 0.324209 | -0.20613 | -0.03834 | CPR7              |
| 0.000118312 | 0.890649696 | 0.902712809 | -0.48264 | 0.040292 | -0.12966 | PEX32             |
| 0.000118591 | 0.209498092 | 0.781875866 | -0.33844 | 0.153658 | -0.13939 | SFK1              |
| 0.000118822 | 0.598532156 | 0.571875715 | 0.251551 | -0.0573  | -0.16293 | YOL057W           |
| 0.000119907 | 0.214175707 | 0.567844831 | 0.321842 | -0.14656 | 0.210739 | MMR1              |
| 0.000120336 | 0.000616542 | 0.428151931 | -0.34126 | 0.353283 | 0.270299 | IMG2              |
| 0.000120672 | 0.826578265 | 1           | -1.20636 | 0.135615 | 0.032228 | YOR314W           |
| 0.000120931 | 0.386354047 | 0.243549962 | 0.576208 | -0.19708 | -0.58942 | SNX41             |
| 0.000121294 | 0.713873054 | 0.482770834 | 0.470907 | 0.080873 | -0.34882 | GIP4              |
| 0.000121294 | 0.002518787 | 1           | -0.44121 | 0.414171 | -0.02588 | TVP15             |
| 0.000121473 | 0.114955379 | 0.020319939 | -0.29558 | 0.162245 | 0.496025 | RPL40B            |
| 0.000122901 | 0.022170199 | 1           | -1.37548 | 0.976304 | 0.163012 | None              |
| 0.000123548 | 0.715720978 | 1           | -0.24716 | -0.04199 | 0.02343  | SLY41             |
| 0.000125647 | 0.707673932 | 0.929633058 | -0.27808 | -0.0484  | 0.062563 | YKL063C           |
| 0.000126056 | 0.003877357 | 1           | 1.247972 | -1.20719 | -0.07331 | None              |
| 0.000127573 | 0.024218523 | 1           | 0.375026 | -0.28247 | -0.02354 | SFB2              |
| 0.000127993 | 0.939749928 | 0.929035521 | -0.36172 | 0.020944 | -0.0824  | APC11             |
| 0.000128684 | 1           | 0.558528737 | -0.34526 | 0.002164 | -0.22921 | GPI1              |
| 0.000128791 | 0.321712563 | 0.670294084 | 0.713577 | 0.273826 | 0.394777 | YOR293C- <i>l</i> |
| 0.000128931 | 0.402010292 | 0.726816534 | -0.35431 | -0.11686 | -0.17019 | BIG1              |
| 0.000134368 | 0.056603162 | 0.931918778 | -0.34169 | 0.220253 | -0.07485 | PEX4              |
| 0.000134696 | 0.521582459 | 0.822329423 | 0.340784 | -0.09057 | -0.12681 | SPT7              |
| 0.000135193 | 0.002342    | 0.930039869 | -0.5013  | 0.474952 | -0.1126  | CMC4              |
| 0.00013732  | 0.900344125 | 0.197874004 | -0.26764 | -0.02117 | -0.29494 | HIS2              |
| 0.000137815 | 0.381873848 | 0.498203091 | 0.404816 | -0.14086 | -0.29557 | MCH1              |
| 0.000137815 | 0.953675948 | 0.937179795 | 0.242997 | 0.012476 | 0.052294 | ASP1              |
| 0.000144372 | 0.407136042 | 0.714876394 | 0.267039 | 0.088284 | 0.13411  | HCH1              |
| 0.000144632 | 0.628092366 | 0.69956533  | 0.408184 | 0.088162 | -0.21366 | PEX28             |
| 0.000145012 | 0.75339767  | 0.978193638 | -0.33708 | 0.051555 | 0.053053 | GON7              |
| 0.000145526 | 0.001730034 | 1           | 0.47931  | 0.472753 | 0.023994 | FRE3              |
| 0.000146949 | 0.712618958 | 0.592141711 | 0.528453 | 0.092321 | -0.336   | TDA1              |
| 0.000146949 | 0.767194808 | 0.911946622 | -0.28931 | -0.04177 | 0.074365 | GET4              |
| 0.000147691 | 0.753399338 | 0.321715999 | -0.21117 | 0.032373 | 0.195524 | BGL2              |
| 0.000148837 | 0.98811108  | 1           | -0.32814 | -0.01037 | 0.027119 | FOL3              |
| 0.000150058 | 0.096921872 | 1           | 0.278956 | -0.16341 | -0.02884 | POB3              |
| 0.000150124 | 0.492928432 | 0.960632458 | 0.412456 | -0.11653 | 0.078572 | CYR1              |

|             |             |             |          |          |          |           |
|-------------|-------------|-------------|----------|----------|----------|-----------|
| 0.000150171 | 0.531626008 | 0.772424036 | 0.742762 | 0.195272 | -0.31891 | IRC10     |
| 0.000151727 | 0.194950123 | 0.599983173 | -0.21943 | -0.10438 | -0.13793 | RAS1      |
| 0.000152041 | 0.997790364 | 0.929303164 | -0.3525  | -0.00871 | 0.080559 | DAS2      |
| 0.000153683 | 0.240878476 | 0.971609311 | 0.419    | -0.18604 | -0.07284 | MSH3      |
| 0.00015444  | 0.767134842 | 0.722642147 | -0.3407  | -0.04936 | -0.16582 | ADE4      |
| 0.000155018 | 0.000137589 | 0.834537655 | -0.27574 | 0.314823 | -0.09975 | YSC84     |
| 0.00015634  | 0.612454623 | 0.757681998 | 0.381557 | -0.08627 | -0.1712  | MSA2      |
| 0.000156427 | 0.853297263 | 0.994517386 | -0.74157 | 0.076289 | 0.09986  | None      |
| 0.000157312 | 0.938475636 | 0.834791774 | 0.340331 | 0.020552 | -0.12343 | HIS6      |
| 0.000157583 | 0.230929934 | 0.62113714  | 0.408318 | -0.18482 | 0.250252 | PNT1      |
| 0.000158309 | 0.451996377 | 0.268615319 | -1.07272 | 0.318853 | 1.082158 | None      |
| 0.00015998  | 0.091562555 | 0.002316113 | -0.25071 | 0.148278 | 0.523444 | RPS10B    |
| 0.000160558 | 0.897738563 | 0.996250082 | -0.54693 | 0.044183 | -0.07192 | BUD31     |
| 0.000162623 | 0.039001566 | 0.449106932 | 0.311688 | -0.22059 | 0.246627 | FUN12     |
| 0.000163227 | 0.612377616 | 0.889649609 | -0.27813 | -0.06253 | 0.080952 | LST4      |
| 0.000163311 | 0.355396524 | 0.912157913 | 0.347331 | 0.127344 | 0.089937 | YBR137W   |
| 0.000164145 | 0.819842906 | 1           | -1.28049 | 0.151293 | -0.03581 | DIT1      |
| 0.000164987 | 0.047600922 | 9.24605E-05 | 0.359775 | -0.24649 | -0.89329 | MET10     |
| 0.000165607 | 0.622100216 | 1           | -0.76714 | -0.16686 | -0.07395 | NIT1      |
| 0.000165723 | 0.622910776 | 0.971609311 | 0.253418 | -0.0558  | 0.044499 | GAL83     |
| 0.000165765 | 0.991616462 | 0.786892522 | 0.295157 | 0.008807 | 0.123065 | CTH1      |
| 0.000166789 | 0.871347596 | 0.711247098 | -0.36472 | 0.034993 | 0.186518 | KNS1      |
| 0.000167036 | 0.663621022 | 0.670601582 | 0.769621 | -0.15444 | 0.433922 | SLZ1      |
| 0.000170054 | 0.35545331  | 0.576969329 | -0.24175 | -0.0885  | 0.15897  | YPL245W   |
| 0.000170597 | 0.074432949 | 1           | 0.546865 | -0.34553 | -0.04292 | CDC13     |
| 0.000172814 | 0.388489658 | 0.399715437 | -0.29097 | -0.10006 | -0.24433 | OPI1      |
| 0.000174794 | 0.412262997 | 0.919926509 | -0.40613 | 0.133495 | 0.099917 | SLX1      |
| 0.000175132 | 0.754750696 | 0.862693719 | 0.219329 | 0.033929 | -0.07233 | SAC6      |
| 0.000175177 | 0.091928673 | 0.774318648 | -0.34216 | 0.202811 | 0.147699 | SYC1      |
| 0.000176352 | 0.958672582 | 0.167222206 | -0.40269 | -0.0197  | -0.47013 | YLL058W   |
| 0.000176445 | 0.028113606 | 0.871950707 | -0.39118 | 0.289443 | 0.122612 | BRR6      |
| 0.000176625 | 0.589666034 | 0.84746497  | -0.56595 | 0.132901 | 0.195046 | POC4      |
| 0.000177879 | 0.976830326 | 0.853162234 | -0.2274  | -0.00903 | 0.077486 | EMP47     |
| 0.000178537 | 0.136830998 | 0.952970302 | 0.325027 | -0.17599 | -0.06506 | CSC1      |
| 0.000179511 | 0.632634392 | 0.393421909 | 0.282177 | -0.061   | -0.24025 | LYP1      |
| 0.00017987  | 0.008041053 | 0.659234929 | 0.370661 | 0.325828 | 0.21438  | YKL091C   |
| 0.000180538 | 0.693075842 | 1           | -0.32048 | -0.05894 | -0.02312 | IBD2      |
| 0.000180685 | 0.900786402 | 0.891751427 | -0.27104 | 0.021735 | 0.078184 | YMR130W   |
| 0.000181307 | 0.440961232 | 0.781875866 | -0.84378 | 0.259394 | 0.360024 | YKL183C-1 |
| 0.000182084 | 0.936226276 | 0.043101043 | 0.364102 | -0.02256 | 0.566602 | YBR063C   |
| 0.00018347  | 0.134186983 | 0.812812583 | -0.40325 | 0.216917 | -0.15609 | RAD33     |
| 0.000183682 | 0.446288659 | 0.807027851 | -0.31362 | -0.09753 | -0.12388 | SRB5      |
| 0.000184243 | 0.914594311 | 1           | 0.294886 | -0.02175 | 0.01381  | MNT2      |
| 0.000184306 | 0.693801455 | 1           | -4.29032 | -0.57424 | 0.603042 | None      |
| 0.000185561 | 0.077645949 | 0.721271027 | -0.51308 | 0.315624 | -0.25609 | MRX7      |
| 0.000188902 | 0.918983013 | 0.377923962 | 0.26828  | 0.019166 | 0.235371 | SEC66     |
| 0.000190915 | 0.770350536 | 1           | 0.286766 | 0.041669 | -0.00908 | RIM21     |
| 0.000194673 | 0.38127191  | 0.251662308 | 0.314596 | -0.11186 | -0.32814 | PLB3      |
| 0.000195116 | 0.189863208 | 0.731592804 | -0.32397 | 0.15723  | -0.15756 | YOR097C   |
| 0.000198062 | 0.530999534 | 0.178503269 | 0.344945 | 0.092229 | -0.40092 | GPM3      |
| 0.000199789 | 0.669969608 | 0.702041373 | -0.3756  | 0.073647 | -0.19882 | HTD2      |
| 0.000200194 | 1           | 0.054904024 | 0.307111 | -0.0033  | -0.45627 | NEM1      |
| 0.00020207  | 0.134575272 | 0.524155808 | 0.334583 | -0.18322 | 0.242496 | CLU1      |
| 0.000202825 | 0.46096079  | 0.834202861 | -0.24683 | 0.075198 | 0.091117 | SUI2      |

|             |             |             |          |          |          |         |
|-------------|-------------|-------------|----------|----------|----------|---------|
| 0.000203696 | 0.294576128 | 1           | 0.559935 | -0.23248 | 0.010376 | SNU66   |
| 0.000208056 | 0.826578265 | 0.326434921 | -0.33759 | 0.040277 | -0.31642 | CLP1    |
| 0.000210186 | 0.124795835 | 0.91085821  | 0.368382 | -0.20687 | 0.097851 | RTS1    |
| 0.000214773 | 0.823461891 | 1           | 0.248664 | -0.03039 | 0.017938 | SBP1    |
| 0.000221016 | 0.977693292 | 0.897942454 | -0.75714 | -0.02964 | 0.216264 | None    |
| 0.00022126  | 0.051317862 | 0.95255919  | 0.296057 | -0.20321 | 0.060321 | SDD3    |
| 0.000224598 | 0.135026933 | 0.893930829 | -0.28742 | 0.156699 | 0.083353 | IRA2    |
| 0.000225626 | 0.642716671 | 0.86530488  | 0.209363 | 0.04476  | -0.0692  | ARP3    |
| 0.000229364 | 0.949363945 | 0.641899279 | -0.34037 | -0.01876 | -0.20455 | TAT2    |
| 0.000231071 | 0.337499055 | 0.613403067 | -0.29112 | 0.11161  | 0.18402  | FCY1    |
| 0.000232547 | 0.050446555 | 0.076212737 | -0.28435 | -0.19545 | 0.400566 | BMS1    |
| 0.000232831 | 0.361545268 | 0.549098089 | -0.30897 | 0.113819 | 0.216105 | RPB9    |
| 0.000233624 | 0.321712563 | 0.580281763 | 0.337585 | 0.134015 | -0.22517 | YPI1    |
| 0.000234579 | 0.483079932 | 0.491045055 | 0.274872 | -0.0816  | -0.20961 | VPS35   |
| 0.0002352   | 0.658725803 | 0.847404354 | -0.31944 | -0.06567 | 0.112953 | YAP3    |
| 0.000235306 | 1           | 0.986945047 | 0.335501 | -0.00402 | -0.04909 | MAK32   |
| 0.000239298 | 0.846530385 | 0.830189162 | -0.20448 | 0.022518 | 0.077126 | SAM4    |
| 0.000240766 | 0.649286461 | 0.909554543 | -0.91696 | -0.19096 | 0.249897 | REC104  |
| 0.000243255 | 0.533678741 | 0.750071687 | -0.33279 | -0.08894 | 0.155819 | GAB1    |
| 0.000243255 | 0.358263416 | 0.879698394 | -0.31312 | -0.11667 | 0.097158 | URK1    |
| 0.000246304 | 0.968504857 | 0.997335542 | -0.40749 | -0.01837 | 0.05412  | PEX31   |
| 0.000247707 | 0.652629347 | 1           | -0.50888 | 0.10581  | -0.02818 | None    |
| 0.000247881 | 0.008136572 | 0.411976149 | 0.35819  | 0.320421 | -0.30323 | MDJ1    |
| 0.000248044 | 0.846530385 | 0.113089839 | 0.262766 | -0.0292  | -0.34493 | YAP1    |
| 0.000248536 | 0.395417127 | 0.17936463  | 0.966571 | 0.33914  | 1.143791 | YGL088W |
| 0.000249799 | 0.744117095 | 0.029232    | 0.665001 | 0.109584 | -1.10508 | YDR274C |
| 0.000250641 | 1           | 0.945866293 | -1.57865 | 0.012036 | -0.35925 | FIG1    |
| 0.000250805 | 0.813026602 | 0.003519847 | -0.46837 | -0.05937 | -0.96414 | MET8    |
| 0.000250805 | 0.854733623 | 0.798608504 | 0.888879 | -0.09606 | -0.36778 | YPT35   |
| 0.000250849 | 1.04691E-14 | 0.00395857  | 0.340424 | 0.728423 | -0.69828 | BDH2    |
| 0.000250866 | 0.037225892 | 1           | 0.418027 | 0.305162 | -0.01074 | EMI1    |
| 0.000253444 | 0.261134686 | 0.750952753 | -0.51722 | -0.22778 | -0.24178 | INO1    |
| 0.000254911 | 0.369301019 | 0.236053315 | 0.931176 | -0.34901 | -1.0355  | YDL242W |
| 0.000255287 | 0.284831522 | 0.165301907 | -0.30646 | -0.13005 | 0.371336 | NOP19   |
| 0.000258098 | 0.971367697 | 0.439260184 | 0.333431 | 0.014604 | -0.2744  | FAR10   |
| 0.000259705 | 0.34403671  | 0.063736572 | 0.314951 | 0.121187 | -0.46033 | NGR1    |
| 0.000261163 | 1           | 0.731592804 | 0.237147 | 0.004151 | -0.11784 | PRE6    |
| 0.000261412 | 0.034121869 | 0.919926509 | -0.2927  | 0.215666 | 0.074278 | MRPL17  |
| 0.00026305  | 0.744117095 | 0.252787222 | 0.30757  | -0.05082 | -0.3264  | LPL1    |
| 0.000265566 | 0.261791204 | 0.567844831 | 0.598277 | 0.265685 | -0.40915 | BI05    |
| 0.00026843  | 0.397361658 | 0.743894449 | -0.32116 | 0.111712 | -0.1538  | DSS4    |
| 0.000270671 | 0.058379077 | 0.840202254 | -0.34172 | 0.228967 | 0.125059 | YNR040W |
| 0.000278806 | 0.6215647   | 0.964698121 | -0.27452 | -0.0623  | -0.05223 | CCT6    |
| 0.000281094 | 0.652115007 | 0.976568193 | -0.32138 | -0.06792 | -0.05381 | YLH47   |
| 0.000281392 | 0.779569301 | 0.586097635 | 0.214307 | 0.031058 | -0.14364 | YCK1    |
| 0.000283142 | 0.937223959 | 0.783364287 | 0.268917 | 0.016973 | -0.11726 | YLR042C |
| 0.000283598 | 0.311884893 | 0.916266829 | 0.334457 | -0.13696 | 0.088089 | TUB4    |
| 0.00028505  | 0.850784129 | 0.993440716 | 0.247306 | 0.02727  | -0.0348  | TFA1    |
| 0.000288315 | 0.788420725 | 0.810360586 | 0.337964 | -0.04761 | -0.13674 | SPT20   |
| 0.000288315 | 0.011848972 | 1           | -0.32794 | 0.282911 | -0.03611 | MRPL28  |
| 0.00028935  | 0.339164188 | 0.82890057  | 0.682252 | 0.26732  | -0.26157 | GIT1    |
| 0.000291244 | 0.881033345 | 1           | -0.28601 | 0.027332 | -0.02358 | GGC1    |
| 0.000291405 | 0.015182854 | 0.046985988 | 0.262957 | 0.220643 | -0.4114  | MBF1    |
| 0.000292964 | 0.693741522 | 0.181792015 | -0.29181 | -0.05525 | -0.34481 | OSH6    |

|             |             |             |          |          |          |           |
|-------------|-------------|-------------|----------|----------|----------|-----------|
| 0.000294111 | 0.980772539 | 0.129926108 | -0.37282 | 0.014281 | -0.47929 | SLM3      |
| 0.000294619 | 0.266011692 | 0.745371404 | 0.362392 | -0.16128 | -0.17407 | NUP116    |
| 0.000296219 | 0.596511642 | 0.402187252 | 0.43303  | 0.105103 | -0.37677 | TBS1      |
| 0.000298817 | 0.126086357 | 0.46663268  | -1.68834 | 0.887358 | -1.47313 | YLR296W   |
| 0.000298817 | 0.0122332   | 0.715570823 | -0.34911 | 0.299801 | -0.18129 | COX5B     |
| 0.000301684 | 1           | 0.330481176 | 0.389231 | 0.008405 | -0.37221 | YOR114W   |
| 0.000301717 | 0.328528692 | 0.591339962 | 0.387978 | -0.15565 | -0.25921 | ANR2      |
| 0.000302899 | 0.562298059 | 0.239874247 | 0.259134 | 0.067507 | -0.28305 | HAT2      |
| 0.000302995 | 0.7088986   | 0.848611069 | 0.207952 | -0.0384  | 0.0744   | CCT7      |
| 0.000307289 | 0.27837215  | 0.677517465 | -0.24047 | -0.10445 | 0.138287 | NOB1      |
| 0.000308542 | 0.330237847 | 0.778615611 | 0.256605 | -0.1026  | 0.114605 | SCJ1      |
| 0.000309124 | 0.36194188  | 0.525203768 | -0.30546 | -0.11487 | 0.226312 | CDC40     |
| 0.000309782 | 0.02447321  | 0.915496392 | 0.306378 | -0.24343 | 0.081684 | SUP35     |
| 0.000310272 | 0.025326351 | 0.259414235 | -0.24835 | -0.19543 | 0.264191 | DBP6      |
| 0.000310483 | 0.596380201 | 1           | -2.85436 | 0.55902  | -0.08065 | YNL067W-I |
| 0.000311305 | 0.345281679 | 0.871227843 | 0.29722  | -0.11574 | -0.09757 | SIN3      |
| 0.000311589 | 1           | 0.862693719 | -0.26453 | 0.000525 | -0.09021 | SAD1      |
| 0.000312194 | 0.27669168  | 0.585629945 | -0.52708 | 0.22773  | 0.355077 | YFR035C   |
| 0.000318535 | 0.394221434 | 0.577042274 | -0.2737  | 0.09691  | 0.187109 | RPL4B     |
| 0.000318535 | 0.023258179 | 0.750952753 | 0.525728 | -0.42454 | -0.25094 | VPS64     |
| 0.000320112 | 0.884663483 | 1           | 0.34497  | -0.03283 | -0.02322 | SIZ1      |
| 0.000321111 | 0.279341459 | 0.711247098 | -0.69249 | -0.29994 | -0.37777 | YER135C   |
| 0.00032171  | 0.529464272 | 0.818523526 | 0.27063  | -0.07497 | -0.10754 | SPT2      |
| 0.000322346 | 0.4447765   | 0.650488242 | 0.371    | -0.12104 | 0.22682  | PLC1      |
| 0.000324656 | 0.473710488 | 0.13719416  | 0.444136 | 0.137271 | 0.571261 | TFB5      |
| 0.000331802 | 0.639700807 | 0.76367822  | 0.281317 | 0.062212 | 0.131079 | DFR1      |
| 0.00033291  | 0.606249543 | 0.202387133 | -0.35802 | 0.085047 | -0.41439 | GLG2      |
| 0.000334773 | 0.24689862  | 0.185142339 | -0.25911 | -0.11895 | 0.30886  | UTP6      |
| 0.000335011 | 0.672577856 | 0.764340274 | -0.39748 | 0.080058 | 0.183986 | CIN1      |
| 0.000338473 | 0.765667428 | 0.837234982 | -0.3316  | -0.05085 | 0.125082 | LCL2      |
| 0.000339526 | 0.652629347 | 0.922539567 | 0.25829  | 0.055507 | -0.06566 | STS1      |
| 0.000343897 | 0.691034132 | 0.711541955 | 0.388959 | 0.075648 | -0.2084  | ADK2      |
| 0.000345215 | 0.8635571   | 0.28677728  | 0.447593 | 0.047366 | -0.45848 | FAA2      |
| 0.000346698 | 0.15183452  | 0.041756428 | -0.68857 | 0.370974 | -1.08733 | ATG41     |
| 0.000347392 | 0.550286053 | 0.101364046 | -0.29314 | 0.07812  | -0.40144 | TEM1      |
| 0.000347871 | 0.08272612  | 0.584732535 | 0.469654 | 0.301111 | -0.31951 | YLR456W   |
| 0.000348545 | 0.413512161 | 0.734750569 | -0.35749 | 0.122646 | 0.179115 | GPI11     |
| 0.000348662 | 0.607278799 | 0.226898765 | 1.242093 | 0.29915  | -1.39865 | YIL163C   |
| 0.000354851 | 0.986467664 | 1           | -0.23355 | 0.008181 | 0.002397 | SOL3      |
| 0.000354912 | 0.586093634 | 0.008874818 | -0.32085 | 0.079822 | 0.631032 | FYV7      |
| 0.000354912 | 1           | 0.834791774 | -0.21331 | -0.00043 | -0.08131 | SEC14     |
| 0.000358618 | 0.753846794 | 0.56134476  | 0.392963 | -0.06421 | -0.27852 | RHO4      |
| 0.000359108 | 1           | 1           | -0.63241 | -0.01176 | 0.018056 | RPL36B    |
| 0.000359112 | 1           | 1           | 4.05403  | 0.046564 | 0.050249 | YNR077C   |
| 0.000361889 | 0.639747185 | 0.171413013 | 0.318246 | 0.070855 | 0.390377 | BNA4      |
| 0.000365636 | 0.051508812 | 0.901225243 | 0.287602 | -0.20398 | -0.08408 | CDC24     |
| 0.00036572  | 0.179113779 | 0.669483248 | -0.24043 | -0.12436 | 0.142313 | YCF1      |
| 0.000371395 | 0.695223553 | 0.489652715 | 0.328524 | -0.06361 | -0.25904 | MDM36     |
| 0.000375613 | 0.083385991 | 0.321663363 | 0.466473 | -0.3038  | -0.46478 | COS10     |
| 0.00037748  | 0.156939743 | 0.30954724  | -0.31826 | -0.17249 | -0.31874 | DCR2      |
| 0.000377531 | 0.665960377 | 0.39760733  | -0.44203 | -0.09165 | -0.39268 | ROG1      |
| 0.000380885 | 0.649636464 | 0.569177865 | 0.452133 | -0.09921 | -0.31755 | YPL077C   |
| 0.000381414 | 0.236287265 | 0.046419466 | 0.330224 | 0.156001 | -0.52771 | KIN1      |
| 0.000382512 | 0.94036767  | 0.907281575 | -0.21426 | 0.013269 | -0.06006 | SIS2      |

|             |             |             |          |          |          |                    |
|-------------|-------------|-------------|----------|----------|----------|--------------------|
| 0.000390237 | 0.432562651 | 0.838437232 | 0.440816 | -0.14958 | -0.16776 | FZF1               |
| 0.000393288 | 0.152799039 |             | 1        | 0.292177 | -0.16103 | 0.002418 SPT16     |
| 0.000394542 | 0.166873945 | 0.87106839  | -0.27235 | 0.14454  | 0.090703 | BET3               |
| 0.000394665 | 0.515760255 | 0.184826991 | -0.23362 | -0.06704 | 0.281763 | FCF2               |
| 0.000395973 | 0.887970391 | 0.16670075  | -0.21256 | -0.01964 | 0.264339 | RPB5               |
| 0.00039939  | 0.950105874 | 0.224095016 | -0.31145 | -0.01758 | -0.35369 | PEX1               |
| 0.000406659 | 1           | 0.961737929 | -0.2935  | 7.55E-05 | -0.05877 | FCY21              |
| 0.000408041 | 0.198842787 |             | 1        | 0.381663 | -0.19376 | -0.04035 COY1      |
| 0.000408734 | 0.295565061 |             | 1        | -0.26904 | 0.115236 | -0.00864 TLG1      |
| 0.000408772 | 0.018092653 | 0.786892522 | -0.25597 | 0.214022 | 0.112882 | GRX2               |
| 0.000411669 | 0.098340256 | 0.02398692  | -0.40382 | 0.248671 | 0.717043 | MRP2               |
| 0.000411669 | 0.030231646 | 0.399062539 | 0.304456 | -0.23939 | -0.27309 | MMT1               |
| 0.00041254  | 0.446288659 | 0.715570823 | 0.308709 | -0.10202 | -0.16513 | GRR1               |
| 0.000412894 | 0.009676844 | 0.688473731 | -0.33857 | 0.306153 | 0.194381 | SDH7               |
| 0.000413198 | 0.184976433 | 0.327821109 | -0.2242  | -0.11587 | 0.220216 | IPI3               |
| 0.000416437 | 0.014034771 | 0.634326206 | 0.458294 | -0.40201 | 0.293812 | SPC110             |
| 0.000416928 | 0.397177764 | 0.860528802 | 1.388031 | 0.494291 | 0.506673 | YOL131W            |
| 0.000418695 | 0.279574972 | 0.656171223 | -0.43686 | -0.19328 | -0.2681  | SWF1               |
| 0.000426    | 0.951095533 | 0.837344851 | 0.355548 | 0.020118 | -0.13644 | YPL162C            |
| 0.000426402 | 0.347850933 | 0.201440577 | 0.240844 | 0.095153 | 0.286291 | SSP120             |
| 0.000427652 | 0.461309575 |             | 1        | 0.233408 | -0.07527 | 0.003743 SFB3      |
| 0.000427655 | 0.350598953 | 0.752906449 | -0.37127 | 0.144878 | 0.179009 | HSK3               |
| 0.000432116 | 0.005227243 | 0.790185414 | -0.31209 | 0.300266 | 0.136902 | MRPL19             |
| 0.000434539 | 0.781865517 | 0.830832007 | -0.42395 | -0.06234 | -0.16609 | FAR7               |
| 0.000435661 | 0.918983013 |             | 1        | 2.022039 | 0.149709 | 0.118705 YRF1-7    |
| 0.000436129 | 0.100703333 | 0.876200558 | 0.263783 | 0.163568 | -0.08622 | ZIM17              |
| 0.000436813 | 0.801294446 | 0.935685096 | -0.26652 | -0.03671 | -0.06236 | MNS1               |
| 0.000437277 | 0.812133286 | 0.697639077 | 0.288521 | 0.038509 | -0.16411 | EIS1               |
| 0.000438064 | 0.658315538 |             | 1        | -4.16282 | 0.660634 | -0.70056 YNL067W-I |
| 0.000445779 | 0.051638227 | 0.72917091  | -0.53793 | 0.379926 | 0.277011 | PEX34              |
| 0.000447194 | 0.496224832 | 0.939670905 | -0.51078 | 0.152404 | -0.11603 | THI21              |
| 0.000452229 | 0.967392794 |             | 1        | -0.25221 | -0.01211 | 0.004023 KEX1      |
| 0.000452554 | 0.876137537 | 0.107763832 | 0.263901 | -0.02681 | -0.36475 | YLR225C            |
| 0.000452836 | 0.938970104 | 0.795458324 | -0.42515 | 0.026977 | -0.18425 | ORT1               |
| 0.00045493  | 0.184282947 | 0.677737049 | 0.45007  | -0.23643 | -0.26604 | PKH3               |
| 0.000459716 | 0.193803735 | 0.780208648 | 0.307863 | -0.15918 | -0.14091 | GYL1               |
| 0.000459716 | 0.759241781 | 0.929303164 | -0.30497 | 0.049276 | -0.0754  | YCL002C            |
| 0.00046534  | 0.427585494 | 0.856262311 | -0.45512 | -0.15584 | -0.16296 | YPL216W            |
| 0.000466445 | 0.107317686 | 0.83080918  | -0.35365 | 0.215232 | 0.139175 | SPP2               |
| 0.000466571 | 0.460638341 | 0.817868751 | -0.28795 | -0.09309 | -0.11771 | YDR415C            |
| 0.000467911 | 1           | 0.292035407 | -0.24555 | 0.001635 | 0.254853 | CSL4               |
| 0.000468215 | 0.775055908 | 0.110596652 | -0.7429  | 0.110609 | -1.05873 | PEX9               |
| 0.000477402 | 0.467087012 | 0.804181925 | -0.32364 | -0.10351 | 0.137161 | FMP27              |
| 0.000481774 | 0.586124484 | 0.438960859 | 0.260693 | -0.06688 | 0.224989 | MID1               |
| 0.000490312 | 0.024098511 |             | 1        | 0.235678 | -0.19388 | -0.01536 IXR1      |
| 0.000491982 | 0.005039572 | 0.108272796 | -0.24342 | 0.237443 | 0.337881 | MRPL24             |
| 0.000495015 | 0.021955716 | 0.04443004  | 0.239324 | -0.19981 | 0.395863 | MPP10              |
| 0.000501975 | 0.788895187 |             | 1        | -0.35544 | 0.051306 | 0.038303 ASA1      |
| 0.00050356  | 0.765667428 |             | 1        | -0.28474 | 0.044887 | 0.027332 COG2      |
| 0.000505307 | 0.969164701 | 0.394712497 | 0.222938 | 0.010561 | 0.204074 | YRB1               |
| 0.000506431 | 0.612454623 | 0.993440716 | 0.334928 | -0.08196 | -0.04901 | MDM10              |
| 0.000512511 | 0.66530676  |             | 1        | -4.18987 | 0.672751 | -0.71673 YMR272W-I |
| 0.000513306 | 0.767313943 | 0.708495578 | -0.55916 | -0.08737 | -0.31002 | PSO2               |
| 0.000515221 | 0.023687856 |             | 1        | 0.248359 | -0.20558 | -0.01562 CCR4      |



|             |             |             |          |          |          |           |
|-------------|-------------|-------------|----------|----------|----------|-----------|
| 0.000519542 | 0.764865689 | 0.986912078 | 0.387491 | 0.061893 | -0.05994 | NPP2      |
| 0.000522915 | 0.314228532 | 0.045166127 | -0.24338 | 0.102668 | 0.401118 | RPL31B    |
| 0.000532694 | 0.346392845 | 0.84419011  | 0.235521 | -0.09506 | -0.0899  | BUD14     |
| 0.000537784 | 0.500936572 | 0.66765157  | 1.191689 | -0.36728 | -0.745   | YPR204W   |
| 0.000538359 | 1           | 0.740653672 | 0.254899 | -0.00131 | 0.129766 | SP012     |
| 0.000545955 | 0.860071452 | 0.90453709  | 0.345518 | 0.038213 | 0.10221  | HRT3      |
| 0.00054602  | 0.997425542 | 0.927619939 | 0.25452  | -0.00708 | -0.06481 | PBN1      |
| 0.000559068 | 0.005327849 | 0.324708204 | -0.35497 | 0.346569 | 0.357009 | ECM19     |
| 0.000559765 | 0.692852222 | 0.859694751 | -0.21414 | 0.042569 | 0.077251 | PPH21     |
| 0.000563948 | 0.04701393  | 1           | -0.25586 | 0.18864  | 0.006325 | YBR056W   |
| 0.000564329 | 0.458242569 | 0.86336133  | 0.297757 | -0.09866 | 0.105895 | MCM4      |
| 0.000566285 | 0.051155386 | 0.918987226 | 0.362468 | -0.26597 | -0.09852 | NAB3      |
| 0.000575546 | 0.333861939 | 1           | 4.014777 | 1.368806 | 1.48921  | None      |
| 0.00058138  | 0.477410911 | 0.565847555 | -0.28096 | -0.08934 | -0.20359 | MNL1      |
| 0.000582431 | 0.950105874 | 0.820868642 | 0.431717 | 0.025344 | -0.17823 | VHS1      |
| 0.000583435 | 0.105961984 | 0.179756965 | -0.28997 | 0.180065 | 0.362167 | YCR024C-I |
| 0.000583435 | 0.292826036 | 0.290004916 | -2.50059 | -1.04306 | -3.69384 | None      |
| 0.000596704 | 0.989216982 | 0.962684605 | 0.219617 | -0.00742 | 0.044753 | WBP1      |
| 0.000600525 | 0.52244313  | 0.772090669 | 0.38964  | -0.11448 | -0.18445 | UPC2      |
| 0.000604312 | 0.783881329 | 0.874343567 | -0.60957 | 0.090214 | -0.20673 | YPL264C   |
| 0.000609378 | 0.01281546  | 0.571875715 | -0.61764 | 0.548852 | 0.443159 | FMP23     |
| 0.000616129 | 0.335664802 | 0.467794221 | 0.334414 | -0.13937 | -0.28309 | RTT109    |
| 0.000619014 | 0.615223063 | 0.12209407  | -0.23936 | -0.05832 | 0.329475 | RRT14     |
| 0.000620467 | 0.990169077 | 0.981181758 | 0.328312 | 0.010927 | -0.05551 | YNL165W   |
| 0.000622251 | 0.833793818 | 0.669483248 | -0.49034 | -0.0612  | -0.30203 | RRT13     |
| 0.000626652 | 0.480485132 | 0.481039634 | 0.28779  | -0.09206 | -0.23879 | VPS27     |
| 0.000630203 | 0.440243906 | 0.664126703 | -0.27532 | -0.09439 | 0.171526 | TBF1      |
| 0.000641741 | 0.140485465 | 1           | 0.358955 | -0.21034 | 0.027971 | KCS1      |
| 0.000641982 | 0.407136042 | 1           | 0.434133 | -0.15942 | -0.01204 | LRG1      |
| 0.000642465 | 0.92392503  | 0.715570823 | 0.245012 | 0.018333 | 0.135623 | YAR1      |
| 0.000645939 | 0.620913491 | 0.96218812  | -0.24716 | 0.059572 | 0.050988 | HOM6      |
| 0.000646125 | 0.004400122 | 0.82890057  | 0.247587 | -0.25227 | -0.10086 | SIL1      |
| 0.000649216 | 0.496469376 | 1           | -4.0235  | 0.915324 | -0.97209 | HXT16     |
| 0.000652936 | 0.038593301 | 0.983370642 | 0.295829 | -0.23109 | -0.04932 | HOF1      |
| 0.000656468 | 0.478236611 | 0.985066576 | 0.271248 | 0.087368 | -0.04346 | MED8      |
| 0.000656788 | 0.091928673 | 0.976568193 | -0.24379 | 0.158552 | -0.04337 | MRPL22    |
| 0.000662824 | 0.020403094 | 0.768164938 | 0.386019 | -0.33358 | -0.18678 | SEC6      |
| 0.000662824 | 0.407136042 | 0.931568877 | -1.51067 | -0.53843 | -0.37898 | HOP2      |
| 0.0006642   | 0.472617197 | 0.009452184 | -0.96442 | 0.306431 | -1.99136 | SIP4      |
| 0.000668968 | 0.564303748 | 1           | -0.30171 | 0.082167 | 0.030055 | ARR1      |
| 0.000669332 | 0.32171509  | 1           | 0.620113 | -0.26744 | -0.01442 | YNR063W   |
| 0.000675441 | 0.077481906 | 0.636815206 | -0.254   | -0.17288 | -0.16613 | LYS4      |
| 0.000687026 | 0.893928423 | 0.7990478   | 0.874362 | -0.08192 | -0.39104 | None      |
| 0.000693342 | 0.507001261 | 0.929303164 | 0.227658 | -0.06952 | 0.058007 | PEX25     |
| 0.000693866 | 0.825517831 | 0.791580335 | 0.403965 | -0.05336 | 0.183736 | VPS41     |
| 0.000696278 | 0.995919167 | 0.915496392 | -0.29447 | -0.0088  | 0.083044 | NAT3      |
| 0.000702513 | 0.430250055 | 0.566767977 | 0.201735 | -0.07132 | 0.149002 | CCT5      |
| 0.000702513 | 0.038222175 | 0.888371569 | -0.38085 | -0.29732 | -0.12393 | SPP382    |
| 0.000702605 | 0.099346217 | 0.048861894 | -0.25623 | -0.16482 | -0.42404 | ATG26     |
| 0.000702605 | 0.835126825 | 0.936440675 | 0.286097 | 0.036173 | -0.06905 | DCP1      |
| 0.000708429 | 0.041913401 | 0.652552516 | 0.298493 | 0.229417 | 0.191996 | MXR2      |
| 0.000713012 | 0.38101428  | 1           | 1.465588 | -0.57832 | -0.06915 | YLR412C-I |
| 0.000713031 | 0.950105874 | 0.677620076 | 0.289594 | -0.01718 | 0.177577 | AIM20     |
| 0.000719287 | 0.911433046 | 0.806965865 | 0.270995 | -0.02245 | 0.118187 | SKO1      |

|             |             |             |          |          |          |           |
|-------------|-------------|-------------|----------|----------|----------|-----------|
| 0.000720842 | 0.125172898 | 0.955327449 | -0.38056 | -0.23087 | -0.08249 | POP3      |
| 0.00072089  | 0.076965336 | 0.79124327  | 0.254825 | -0.17569 | 0.116414 | STE5      |
| 0.000723378 | 0.000332944 | 0.065961241 | -0.2013  | 0.244206 | 0.315533 | ATP1      |
| 0.00072346  | 0.384327883 | 0.561585828 | -0.31703 | 0.121356 | -0.23496 | YPL107W   |
| 0.000723655 | 0.332602552 | 0.36347688  | -0.23473 | -0.09883 | 0.229312 | SSF2      |
| 0.000726464 | 0.660417863 | 0.378965865 | 0.301267 | -0.06723 | -0.28857 | MRL1      |
| 0.000730395 | 0.346188985 | 0.559860815 | 0.215234 | -0.08891 | 0.161378 | DBP5      |
| 0.000734177 | 0.533678741 | 0.963980547 | -0.38168 | 0.109975 | 0.078082 | YJR124C   |
| 0.000738267 | 0.537835584 | 0.931568877 | 1.9028   | -0.55286 | -0.52226 | YMR230W-1 |
| 0.000743111 | 0.032880551 | 0.525280623 | -0.26572 | 0.212178 | -0.20868 | PET20     |
| 0.000743111 | 0.884827129 | 0.976568193 | 0.270278 | 0.027187 | -0.04847 | YHC1      |
| 0.000743111 | 0.486616397 | 1           | -0.35268 | -0.11194 | -0.02041 | TP03      |
| 0.000752712 | 0.028417401 | 0.11348234  | -0.34978 | 0.286297 | 0.495675 | TIM8      |
| 0.000752946 | 0.195663525 | 0.743371659 | -0.2933  | 0.154979 | 0.151406 | APN1      |
| 0.000756418 | 0.951086794 | 0.586097635 | -0.45534 | -0.02663 | -0.32523 | SHR5      |
| 0.000759745 | 0.499768153 | 0.916400787 | 0.180085 | -0.05615 | 0.050803 | DED81     |
| 0.00076801  | 0.207851396 | 0.567844831 | 0.211063 | -0.11026 | 0.156637 | SHO1      |
| 0.000770238 | 0.099561277 | 0.35208106  | 0.407486 | 0.264227 | -0.40483 | RCR1      |
| 0.000775281 | 0.015544148 | 0.558625562 | -0.32648 | 0.291133 | 0.244947 | RSM19     |
| 0.000775281 | 0.308388389 | 0.98500242  | 0.261455 | 0.11533  | -0.04313 | IDP1      |
| 0.00077834  | 0.713873054 | 0.429538302 | -1.69093 | 0.307238 | 1.585854 | None      |
| 0.000780762 | 0.176877685 | 0.770752057 | 0.358997 | 0.197951 | 0.174553 | YLR126C   |
| 0.000784504 | 0.199496245 | 0.92566928  | 0.194638 | -0.10322 | 0.05184  | YNL247W   |
| 0.000784504 | 0.240592911 | 0.934511234 | -0.37865 | 0.185717 | -0.09263 | YMR252C   |
| 0.000794412 | 0.892198191 | 1           | -3.97077 | 0.277021 | -0.29333 | YLR157W-1 |
| 0.000794553 | 0.136629201 | 1           | 0.332525 | -0.20014 | -0.0184  | YJR061W   |
| 0.00080546  | 0.04046433  | 0.990208543 | -0.42337 | 0.327378 | 0.065696 | YER076C   |
| 0.000809559 | 0.367959138 | 0.496426949 | -0.38676 | 0.153891 | -0.3171  | MEP3      |
| 0.000819366 | 0.564430341 | 0.839890676 | 0.232229 | -0.06473 | -0.09276 | DCP2      |
| 0.000819558 | 0.014428866 | 0.904680493 | 0.297933 | 0.271269 | 0.090024 | FES1      |
| 0.000820249 | 0.014447394 | 0.89043028  | 0.350368 | -0.32109 | -0.11313 | GIN4      |
| 0.000821365 | 0.99176478  | 1           | -0.30658 | -0.01009 | 0.03226  | NT01      |
| 0.000829239 | 0.868504082 | 1           | 0.212402 | -0.02329 | 0.020526 | TPM2      |
| 0.000840379 | 0.062985577 | 0.838617816 | 0.262217 | -0.18977 | -0.10532 | UBA1      |
| 0.000845934 | 0.885106299 | 0.781154036 | -0.23886 | 0.02397  | 0.113417 | HIP1      |
| 0.000850902 | 0.095680569 | 0.540033807 | 0.274708 | -0.18236 | -0.2139  | ARE1      |
| 0.000856639 | 0.233652909 | 1           | -3.99943 | -1.63763 | 1.754137 | None      |
| 0.000857831 | 0.041913401 | 0.717705244 | -0.4043  | -0.31517 | -0.22822 | GUP2      |
| 0.000868595 | 0.603345299 | 0.901225243 | 0.311708 | -0.08085 | -0.09704 | YDR541C   |
| 0.000873341 | 0.868862376 | 0.971609311 | -0.22144 | -0.02418 | -0.04257 | ENT5      |
| 0.000874136 | 0.963472115 | 0.971609311 | 0.339345 | -0.01789 | -0.06533 | CUL3      |
| 0.000874869 | 0.157035658 | 0.971609311 | -0.33112 | 0.189846 | 0.063332 | SYS1      |
| 0.000874872 | 0.759733432 | 0.597863762 | -0.29037 | -0.04898 | -0.20738 | VPS38     |
| 0.000875244 | 0.231636316 | 0.203404731 | 0.210668 | -0.10674 | -0.26169 | ADE2      |
| 0.000875666 | 0.488592146 | 0.733341705 | -0.24472 | 0.07826  | 0.132122 | NUC1      |
| 0.000879168 | 0.628843645 | 1           | -0.37412 | -0.09078 | -0.03392 | PET18     |
| 0.000885214 | 0.118813668 | 0.744376434 | 0.413054 | -0.26133 | -0.21585 | YAP7      |
| 0.000885539 | 0.025661604 | 0.729715118 | -0.3981  | 0.334677 | -0.21546 | GPI18     |
| 0.000885539 | 0.615223063 | 0.908303081 | 0.287593 | -0.07258 | -0.08566 | UNG1      |
| 0.000886649 | 1           | 0.811835676 | -0.46391 | 0.004536 | -0.20218 | SCW11     |
| 0.000887025 | 0.07978505  | 0.968819743 | 0.214025 | -0.14861 | 0.043025 | RTF1      |
| 0.000889428 | 0.016503521 | 0.972387712 | 0.452725 | -0.41205 | -0.08639 | RFC1      |
| 0.000899972 | 0.619450596 | 1           | 0.283334 | -0.07092 | -0.01654 | KCH1      |
| 0.000915918 | 0.126912899 | 0.318881364 | -0.20949 | -0.12901 | 0.221533 | DBP9      |

|             |             |                                                          |
|-------------|-------------|----------------------------------------------------------|
| 0.000923197 | 0.518133314 | 1 -4.39431 -1.11181 1.205969 None                        |
| 0.000923521 | 0.010032448 | 0.994376352 0.954193 0.920282 -0.14348 PHM7              |
| 0.000929891 | 0.084180469 | 0.004134287 -0.23996 0.163565 0.543027 RPL34A            |
| 0.000943378 | 0.533678741 | 0.431105692 0.182538 -0.05411 0.167154 TIF5              |
| 0.000947636 | 0.161855773 | 0.971609311 -0.28973 0.165661 0.056203 TIM18             |
| 0.000948099 | 0.325985364 | 1 0.373527 -0.16339 -0.05184 NPR3                        |
| 0.000948827 | 0.464413458 | 0.815112247 0.209101 -0.07112 -0.09107 POP2              |
| 0.000950263 | 0.919230327 | 0.904680493 0.273925 0.021918 -0.08407 NBP35             |
| 0.0009509   | 0.308388389 | 0.438612707 1.580747 0.687459 1.508782 COX1              |
| 0.000953038 | 0.74444644  | 0.584732535 0.247837 0.044856 -0.18208 TAF7              |
| 0.000960435 | 0.929795254 | 0.113089839 -0.23907 0.017506 0.346455 NHP2              |
| 0.0009681   | 0.436731198 | 0.907281575 -0.25676 0.09149 0.077308 RPB4               |
| 0.000970632 | 0.953371228 | 1 0.672166 0.040027 -0.08657 None                        |
| 0.000989074 | 0.15633472  | 1 -0.27924 -0.1629 -0.02805 NMA111                       |
| 0.00099683  | 0.902616953 | 0.13719416 -0.26023 -0.02335 0.362384 AAH1               |
| 0.001010586 | 0.938960046 | 0.765014016 0.196956 -0.01345 0.099103 GLC7              |
| 0.001018332 | 0.329305093 | 0.953128828 0.354993 -0.15546 0.080259 CMR2              |
| 0.001024445 | 0.380470847 | 0.577843626 -0.72156 0.283423 0.536212 SSP1              |
| 0.001024623 | 0.95461314  | 0.847404354 -1.2908 -0.07315 0.514259 None               |
| 0.001031619 | 0.358276703 | 0.971561168 -0.80364 0.32733 0.159853 HUR1               |
| 0.001033649 | 0.61985593  | 0.949031652 -0.26277 0.06587 -0.06076 ERP5               |
| 0.001036637 | 0.653468553 | 0.770752057 -0.34948 -0.08079 -0.17351 YJR098C           |
| 0.001038279 | 0.927882032 | 0.919926509 0.297338 0.022487 0.083613 DOS2              |
| 0.001044019 | 0.428998997 | 1 3.869997 1.174661 1.282869 None                        |
| 0.001045304 | 0.814509078 | 0.616015902 0.384172 -0.05438 -0.27044 IST1              |
| 0.001045807 | 0.842331341 | 0.011004386 1.242998 0.155772 2.772061 YOR381W- <i>t</i> |
| 0.001045807 | 0.518133314 | 0.927131674 0.923424 -0.28811 0.25207 HXT15              |
| 0.001045807 | 0.738978817 | 1 -0.3606 0.066128 0.021412 EMC6                         |
| 0.001045968 | 0.020884935 | 0.120010897 -0.60097 0.524809 0.859505 NCE101            |
| 0.001049596 | 0.803202217 | 0.711421266 -0.23982 -0.03503 0.139674 RRN3              |
| 0.001051596 | 0.139798632 | 0.789517744 0.23019 -0.14031 0.108947 YHR045W            |
| 0.001059248 | 0.007076411 | 0.255950109 -0.70107 0.692387 -0.81253 REG2              |
| 0.001059248 | 0.414021553 | 0.789517744 0.260575 -0.09794 -0.1233 MED1               |
| 0.001059248 | 0.78141125  | 1 -3.92806 -0.47352 0.502829 None                        |
| 0.001059248 | 0.990169077 | 1 0.31703 -0.01106 -0.0275 PRP4                          |
| 0.001065815 | 0.030733392 | 0.264879577 0.833087 0.697252 -0.95438 ALP1              |
| 0.0010727   | 0.118813668 | 0.853367097 0.195544 -0.12514 0.075876 LCB1              |
| 0.001086154 | 1           | 0.229407061 0.343498 0.008026 -0.41798 POG1              |
| 0.001087953 | 0.17746989  | 0.786584362 0.394163 0.222789 -0.18755 ATG9              |
| 0.001090917 | 0.479437499 | 0.812812583 -0.28061 -0.09335 -0.12415 DYN3              |
| 0.00109483  | 0.661068682 | 0.972782671 -0.1949 0.044547 0.037542 HCR1               |
| 0.001109158 | 0.397738268 | 0.008957438 -0.44319 0.17033 0.94851 YGL194C- <i>t</i>   |
| 0.001109158 | 0.775312326 | 0.465799976 2.034528 -0.31585 2.066515 YHL037C           |
| 0.001116519 | 0.27789823  | 0.931005601 1.117896 0.537757 0.291769 THI13             |
| 0.001117436 | 0.582123297 | 0.816819753 -2.00538 0.490659 -1.00964 None              |
| 0.001117436 | 0.96919526  | 0.92711763 0.235184 -0.01183 -0.0639 RTT106              |
| 0.001123441 | 0.418773131 | 0.673402119 -0.2055 -0.07651 0.13108 YGR054W             |
| 0.001123441 | 0.402477551 | 0.744376434 -0.92286 0.348208 -0.48426 YNL019C           |
| 0.001145908 | 1           | 0.378557332 2.710867 0.022872 3.109034 YLR464W           |
| 0.001148246 | 0.76967246  | 0.90015429 0.548514 -0.09187 -0.17605 YBR013C            |
| 0.001151124 | 0.008862509 | 1 0.272905 -0.27277 0.030088 RSC8                        |
| 0.001151156 | 0.110870889 | 0.978193638 0.347977 -0.22872 -0.06368 VIK1              |
| 0.001161678 | 0.140829707 | 0.883095126 0.321777 -0.19738 -0.11112 YFR016C           |
| 0.001171297 | 0.487676602 | 0.55529834 0.471156 -0.15676 -0.36893 FAR3               |

|             |             |             |          |          |          |                    |
|-------------|-------------|-------------|----------|----------|----------|--------------------|
| 0.001173387 | 0.823755279 | 0.175838148 | -0.26552 | 0.036455 | -0.35085 | MAM3               |
| 0.001173387 | 0.482993634 | 0.179756965 | 1.063146 | -0.3591  | -1.47364 | None               |
| 0.001175156 | 0.443467125 |             | 1        | -0.72586 | 0.256296 | 0.079004 YDR034W-I |
| 0.001185603 | 0.885106299 | 0.516122403 | 1.082446 | -0.11416 | -0.91184 | YCL001W-I          |
| 0.001186742 | 0.796833215 | 0.976568193 | 0.270978 | -0.04113 | 0.050642 | ALG3               |
| 0.001189271 | 0.616266876 |             | 1        | 0.19849  | -0.05105 | 0.027268 KTR4      |
| 0.001189714 | 0.676923904 | 0.922684393 | 0.348251 | -0.07717 | -0.09725 | CET1               |
| 0.001196141 | 0.479887942 |             | 1        | 0.218144 | -0.07339 | 0.028608 CHS5      |
| 0.001199197 | 0.382001694 |             | 1        | 0.541744 | -0.21973 | 0.034659 PKH2      |
| 0.001216226 | 0.0122332   | 0.737956609 | -0.23431 | 0.224373 | -0.12728 | VTC3               |
| 0.001223321 | 0.709900242 | 0.790203342 | 0.283909 | -0.05811 | -0.13524 | ATG18              |
| 0.001224607 | 0.792133624 | 0.740431023 | 0.24794  | 0.038377 | -0.13435 | AOS1               |
| 0.001228193 | 0.041731521 | 0.86530488  | 0.218261 | -0.17628 | -0.08177 | HBS1               |
| 0.001237386 | 0.810491252 | 0.058656331 | -0.23136 | 0.033398 | 0.387294 | RPF2               |
| 0.001237386 | 0.97067567  | 0.919271701 | -0.27976 | 0.013816 | -0.0804  | SNX3               |
| 0.001249532 | 0.662458676 | 0.971609311 | -0.37684 | -0.08669 | 0.075718 | AST2               |
| 0.001268409 | 0.066428344 | 0.039714977 | -0.20164 | 0.14808  | 0.366376 | RPL17A             |
| 0.001268409 | 0.267877158 | 0.69956533  | -0.27906 | 0.136614 | 0.170135 | YJL127C-I          |
| 0.001270465 | 0.957430726 | 0.062061839 | -0.18814 | 0.010772 | 0.312016 | RTN1               |
| 0.001276125 | 0.995958449 | 0.949939733 | -0.29235 | -0.00911 | -0.06855 | UAF30              |
| 0.001292588 | 0.113532921 | 0.917327363 | -1.33688 | 0.829721 | 0.386089 | YLR365W            |
| 0.001299535 | 0.001473853 | 0.00034954  | -0.27925 | 0.32369  | 0.759841 | RPL29              |
| 0.001322471 | 0.413532829 | 0.411752857 | 0.282165 | -0.10824 | -0.2714  | STB1               |
| 0.001326018 | 0.842370046 | 0.677620076 | -0.8392  | 0.105339 | 0.54075  | None               |
| 0.001332707 | 0.295242295 | 0.127873691 | -0.28127 | 0.132132 | 0.407305 | RUB1               |
| 0.001341058 | 0.470923648 | 0.747048811 | -0.2534  | 0.087178 | 0.135341 | BER1               |
| 0.001350494 | 0.349410964 | 0.002316113 | -0.19479 | -0.08363 | 0.475414 | NOP4               |
| 0.001350947 | 1           |             | 1        | 0.171521 | 0.00277  | -0.0054 TUB2       |
| 0.001354151 | 0.962083212 |             | 1        | 0.292374 | -0.01621 | 0.041968 IAH1      |
| 0.001356237 | 0.139798632 | 0.976568193 | 0.29795  | -0.18553 | 0.056601 | MSS4               |
| 0.001360708 | 1.74071E-09 | 2.07221E-05 | 0.187935 | 0.366765 | -0.5811  | GPD1               |
| 0.001371611 | 0.491008005 | 0.750952753 | -0.38628 | -0.12751 | -0.20565 | EST2               |
| 0.001374066 | 0.000249464 | 0.148150244 | -0.21291 | 0.276389 | 0.299498 | ATP16              |
| 0.001383838 | 0.753332864 | 0.077306681 | -0.31616 | -0.05706 | -0.50716 | SWT21              |
| 0.00139251  | 0.360876565 |             | 1        | -0.39335 | -0.16606 | -0.02898 YLR297W   |
| 0.001394854 | 0.995214622 |             | 1        | -0.24944 | -0.00802 | 0.005595 VAC8      |
| 0.001412436 | 0.082198263 | 0.043168161 | -0.18982 | -0.1352  | 0.341524 | UTP18              |
| 0.001412608 | 0.985451395 |             | 1        | 0.215344 | 0.008619 | -0.03119 SKP1      |
| 0.001413184 | 0.368353535 | 0.599598606 | -0.48823 | 0.202448 | 0.360197 | SMX2               |
| 0.001415433 | 0.304299791 | 0.935962035 | -0.26198 | 0.121286 | -0.06678 | NHX1               |
| 0.001418794 | 0.819842906 | 0.496483031 | -0.30692 | -0.04341 | -0.26418 | MOG1               |
| 0.001420057 | 0.040357896 | 0.728625888 | 0.33132  | -0.27315 | -0.18823 | HPR1               |
| 0.001423903 | 0.207956416 |             | 1        | 0.275042 | -0.15109 | -0.00755 RSC4      |
| 0.001425037 | 0.628871924 | 0.207271346 | 0.220843 | -0.05609 | -0.28382 | HIS7               |
| 0.00142646  | 0.209597822 | 0.720195138 | -0.2792  | 0.151403 | 0.162198 | MRF1               |
| 0.00142646  | 0.157263376 |             | 1        | -0.22519 | -0.13496 | 0.00917 TRM10      |
| 0.001442013 | 0.082785052 | 0.451184565 | -0.40292 | 0.284426 | -0.36977 | BOP2               |
| 0.001442013 | 1           |             | 1        | 3.098652 | -0.07391 | -0.14211 YBL111C   |
| 0.001446974 | 0.310057499 | 0.8119342   | -0.2414  | 0.111133 | 0.109519 | SCS2               |
| 0.001446974 | 0.185561714 | 0.926181253 | -0.24472 | -0.13929 | -0.06811 | SEC39              |
| 0.001452648 | 0.970974534 | 0.391001548 | -0.31514 | -0.01572 | -0.3129  | YDR109C            |
| 0.001455494 | 0.000577638 | 0.972461195 | -0.22886 | -0.28676 | 0.045288 | GIC2               |
| 0.001479579 | 0.184156664 |             | 1        | 0.23737  | -0.13639 | -0.00635 CTR9      |
| 0.00149104  | 0.954188947 | 0.539917165 | -0.22313 | -0.01344 | 0.181795 | ALG5               |

|             |             |             |          |          |          |           |
|-------------|-------------|-------------|----------|----------|----------|-----------|
| 0.001491594 | 0.250649618 | 0.046235167 | -0.1913  | -0.098   | 0.341617 | ENP1      |
| 0.001492241 | 0.892744236 | 0.406901206 | -0.24293 | 0.024022 | 0.237393 | DUT1      |
| 0.001494531 | 0.529751676 | 0.91703897  | 0.493523 | -0.15423 | -0.1464  | SLD7      |
| 0.001497366 | 0.198089285 | 0.87592683  | -0.209   | 0.116435 | -0.07538 | OSH7      |
| 0.00150176  | 0.339193543 | 0.976378097 | 0.30317  | -0.13461 | 0.058694 | BNI1      |
| 0.001502187 | 1           | 0.789517744 | -0.32326 | -0.00869 | -0.157   | SR077     |
| 0.001509149 | 0.753332864 | 1           | 0.528482 | 0.096999 | -0.0765  | YLR053C   |
| 0.001509483 | 0.838806875 | 0.440092898 | -0.25791 | -0.03388 | 0.242048 | SPE4      |
| 0.00151699  | 0.028455376 | 0.350046527 | -0.27267 | 0.236574 | 0.287253 | MIC19     |
| 0.001519476 | 0.762436308 | 0.714114751 | 0.496743 | -0.08745 | -0.29591 | SSH4      |
| 0.00152807  | 0.157412865 | 0.531220921 | -0.27034 | -0.16286 | 0.224113 | FAL1      |
| 0.001533885 | 0.925288466 | 0.058656331 | -0.89358 | 0.069637 | 1.517402 | None      |
| 0.001549458 | 0.441943453 | 0.673402119 | 0.212229 | -0.07838 | 0.139604 | IOC4      |
| 0.001550845 | 0.093143688 | 1           | -0.28599 | 0.198647 | 0.022517 | FTH1      |
| 0.001555824 | 1           | 0.598011569 | 1.592643 | -0.00201 | 1.262373 | FYV12     |
| 0.001561455 | 0.912368353 | 0.23906305  | 0.216909 | 0.018991 | 0.270081 | RPL7A     |
| 0.00156893  | 0.051484274 | 0.92578246  | 1.501794 | -1.24129 | -0.51434 | HXT10     |
| 0.001590924 | 0.964932829 | 1           | 0.256818 | 0.014023 | 0.037593 | SGT1      |
| 0.001593899 | 0.121271795 | 1           | 0.229973 | -0.15122 | -0.02486 | CDC1      |
| 0.001594499 | 1           | 0.795907717 | 0.387137 | 0.00723  | 0.18592  | DOA4      |
| 0.001606664 | 0.004742556 | 0.721271027 | -0.28853 | 0.310201 | 0.168385 | AIM18     |
| 0.00161356  | 0.08826227  | 0.661089241 | -0.18113 | -0.12847 | -0.12234 | FAS2      |
| 0.001614868 | 0.002518787 | 0.881658423 | -0.19879 | -0.22734 | 0.070763 | FAR1      |
| 0.001617795 | 0.11971678  | 1           | 0.322325 | -0.21332 | -0.0211  | SNF5      |
| 0.00161907  | 0.244363463 | 0.937179795 | -0.23796 | 0.12355  | -0.06108 | MSD1      |
| 0.001628615 | 0.000743475 | 0.331627583 | -0.2842  | 0.351011 | 0.308241 | COA3      |
| 0.001642926 | 0.818575144 | 0.466577874 | 0.218675 | -0.03166 | 0.201009 | YGR026W   |
| 0.001652945 | 0.740319156 | 0.699384165 | 0.519228 | -0.10009 | -0.32619 | MMO1      |
| 0.001675285 | 0.880383419 | 0.406901206 | -0.26708 | 0.029325 | -0.26295 | ROY1      |
| 0.00167562  | 0.479887942 | 0.702041373 | -0.3228  | 0.11083  | -0.19964 | CGI121    |
| 0.001679533 | 0.055168494 | 0.910058751 | 0.249987 | -0.19689 | 0.077921 | NSP1      |
| 0.001686611 | 0.729751469 | 0.862693719 | -0.22779 | 0.044962 | 0.088523 | VCX1      |
| 0.001692024 | 0.888561341 | 0.962684605 | 0.411329 | -0.04276 | 0.091324 | PHO80     |
| 0.001692024 | 0.058914883 | 1           | 0.363319 | -0.28347 | -0.02153 | PMS1      |
| 0.001694459 | 0.775312326 | 0.953606441 | 0.241283 | -0.04067 | -0.05673 | UFD2      |
| 0.001699948 | 0.022170199 | 0.904680493 | 0.325171 | -0.29958 | 0.104784 | SBE22     |
| 0.001707274 | 0.76984172  | 0.524702337 | -0.25839 | -0.0441  | 0.218457 | RPP1      |
| 0.001707274 | 0.779493671 | 0.755422986 | -0.23151 | -0.03839 | -0.12407 | FKH1      |
| 0.001717577 | 0.187466722 | 0.088199    | -0.27285 | 0.156435 | 0.434592 | RPL12A    |
| 0.001722487 | 0.151510275 | 0.083080335 | 0.35729  | 0.221427 | -0.57432 | YDL206W   |
| 0.001732071 | 0.571273445 | 1           | -0.505   | -0.14626 | 0.005673 | COS8      |
| 0.00174176  | 0.240597184 | 0.897313673 | 0.178018 | -0.0942  | 0.059885 | SSZ1      |
| 0.00174648  | 0.001264075 | 0.592391518 | 0.197318 | -0.23994 | -0.15068 | TEC1      |
| 0.001757132 | 0.957259373 | 0.241377894 | 0.178503 | -0.01058 | -0.22291 | SER1      |
| 0.001757738 | 0.374954065 | 0.711247098 | -0.31117 | -0.13093 | -0.18972 | VFA1      |
| 0.001763044 | 0.531968668 | 0.27982387  | -0.33799 | -0.10561 | -0.39702 | MCH4      |
| 0.001777813 | 0.53992737  | 0.972387712 | 0.373262 | 0.115698 | -0.07548 | CDC23     |
| 0.001786258 | 0.138242749 | 0.828935693 | -0.27656 | 0.175271 | 0.121737 | MRP17     |
| 0.001786258 | 0.408819304 | 0.91703897  | -0.65888 | 0.257131 | 0.196804 | YNL097C-I |
| 0.001786258 | 0.413008972 | 1           | -0.80766 | 0.309583 | 0.023525 | SPO23     |
| 0.001791993 | 0.408819304 | 1           | -0.29304 | -0.11578 | -0.02067 | TEL1      |
| 0.001793005 | 0.440961232 | 0.919516515 | -0.45336 | 0.167799 | -0.13378 | SHU1      |
| 0.001798211 | 0.013379255 | 0.388159122 | -0.29875 | 0.291268 | 0.303491 | PET100    |
| 0.001807256 | 0.585153927 | 0.101545647 | 0.243873 | 0.069536 | -0.38015 | RPN4      |

|             |             |             |          |          |          |                  |
|-------------|-------------|-------------|----------|----------|----------|------------------|
| 0.001818954 | 0.100361569 | 0.955327449 | 0.301771 | -0.21067 | -0.0708  | GPI13            |
| 0.00184571  | 0.748281711 | 0.139610149 | -0.3175  | 0.059565 | 0.463743 | YLR363W-/        |
| 0.001883706 | 0.265931927 |             | 1        | 0.636512 | -0.33072 | -0.08036 POX1    |
| 0.001894393 | 0.986058626 | 0.990110569 | -0.30989 | 0.012481 | -0.05213 | TTI2             |
| 0.001912501 | 0.947996628 | 0.875200775 | -0.62174 | 0.040589 | -0.23089 | YGL081W          |
| 0.001916819 | 0.666318943 | 0.837446458 | 0.1863   | -0.04413 | 0.080621 | SEC27            |
| 0.0019364   | 0.36194188  | 0.50572517  | -0.34597 | -0.15004 | -0.30275 | CAC2             |
| 0.00193781  | 0.035674243 |             | 1        | 0.402214 | -0.34808 | 0.027922 RSC2    |
| 0.001947108 | 0.754399867 | 0.983370642 | 0.22398  | -0.04165 | 0.040879 | LNP1             |
| 0.001960702 | 0.75339767  |             | 1        | -3.8096  | 0.546366 | -0.58595 None    |
| 0.00196616  | 0.653029567 | 0.67221425  | -0.53713 | 0.130295 | 0.361229 | MRPL51           |
| 0.001970272 | 0.213420104 | 0.76367822  | -0.33272 | 0.184137 | -0.17703 | CWC2             |
| 0.001971791 | 0.001118198 | 0.0086529   | 0.270246 | 0.333144 | 0.614324 | MRPL39           |
| 0.001972581 | 0.165679639 | 0.915545807 | 0.299243 | 0.182219 | -0.09162 | TFB6             |
| 0.001982677 | 0.567338142 | 0.79041392  | -1.75501 | 0.488611 | -0.92943 | YPL261C          |
| 0.00198368  | 0.615920906 | 0.735602795 | 0.204388 | 0.054937 | -0.11741 | NYV1             |
| 0.002015236 | 0.516700017 | 0.845430426 | 0.228125 | -0.07474 | 0.096531 | CAF40            |
| 0.002028184 | 0.059509508 | 0.071682931 | 0.241823 | -0.19056 | 0.408649 | TRM3             |
| 0.002046916 | 0.155051744 |             | 1        | 0.172995 | -0.10812 | -0.00373 ARO3    |
| 0.00205893  | 0.138509482 | 0.016158803 | -0.21219 | 0.136171 | 0.453373 | RPS25B           |
| 0.002073277 | 0.492734305 | 0.715570823 | -0.32635 | -0.1114  | -0.19767 | DNF3             |
| 0.002106968 | 0.767194808 |             | 1        | -0.22747 | 0.040045 | 0.027207 GVP36   |
| 0.002129353 | 0.078795222 |             | 1        | 0.247905 | 0.185372 | -0.00829 MPC1    |
| 0.002139284 | 0.455132842 | 0.966197359 | 0.28587  | 0.105966 | -0.0634  | CCC2             |
| 0.002156828 | 0.397361658 |             | 1        | -0.25534 | 0.104565 | -0.03432 TCM62   |
| 0.002182081 | 0.19339556  | 0.52021616  | -0.21876 | 0.127004 | 0.190375 | VMA16            |
| 0.002185703 | 0.166697083 | 0.97620447  | 0.320449 | -0.19714 | -0.06429 | HPC2             |
| 0.002187141 | 0.146050112 | 0.978193638 | 0.371459 | -0.23852 | -0.07174 | WHI3             |
| 0.002192863 | 0.261791204 | 0.740875651 | 0.945746 | 0.492157 | 0.54413  | LDS2             |
| 0.002193175 | 0.236124298 | 0.733389979 | -0.19915 | -0.10787 | 0.115992 | VBA4             |
| 0.002202087 | 0.66730791  | 0.554003774 | -0.19059 | 0.045279 | 0.157421 | IFA38            |
| 0.002221072 | 0.116008771 | 0.021809306 | -0.22583 | 0.153498 | 0.465703 | RPL23A           |
| 0.002226366 | 0.322263381 | 0.680777882 | -0.31773 | 0.148579 | -0.21161 | PEX7             |
| 0.002231021 | 1           | 0.719704683 | 0.276254 | -0.00582 | -0.16773 | MSL5             |
| 0.002246098 | 0.732764313 | 0.978377916 | 1.41772  | 0.286243 | -0.27021 | None             |
| 0.002253026 | 0.448302145 | 0.042142302 | 0.239585 | 0.090021 | -0.44944 | VHR1             |
| 0.002286987 | 0.257848317 | 0.659101564 | -0.22627 | 0.118798 | -0.15809 | CIR1             |
| 0.002310738 | 0.163898203 | 0.69574725  | -0.28445 | -0.17565 | 0.185666 | FHL1             |
| 0.002324401 | 0.765828853 | 0.822329423 | -0.29646 | -0.05297 | -0.13576 | SFI1             |
| 0.002338441 | 0.259983558 | 0.097506324 | 0.286587 | 0.151105 | -0.45995 | RAD51            |
| 0.00235513  | 0.38127191  |             | 1        | -0.35733 | -0.15251 | 0.017492 MUS81   |
| 0.002356088 | 0.011580663 | 0.966082547 | 0.435162 | -0.45144 | 0.097961 | GAL11            |
| 0.002360047 | 0.925411578 | 0.600528962 | -1.16247 | -0.09195 | -0.96165 | None             |
| 0.002378113 | 0.166610832 | 0.406901206 | -0.31083 | 0.190557 | -0.31517 | SPR6             |
| 0.002382604 | 0.880864802 |             | 1        | -0.37147 | -0.04192 | -0.05212 RTR2    |
| 0.002389458 | 0.73982331  | 0.726816534 | 0.189084 | 0.03745  | 0.11293  | RVS161           |
| 0.00239308  | 0.649028901 | 0.947945497 | -0.29406 | -0.07416 | -0.07381 | ASF2             |
| 0.002394728 | 0.551291677 | 0.648751155 | -0.45185 | 0.139685 | -0.32143 | HUG1             |
| 0.002394728 | 0.754826631 | 0.689558052 | -1.67012 | -0.29466 | -1.25205 | None             |
| 0.002394728 | 0.767134842 |             | 1        | -0.29131 | 0.051931 | -0.03615 DXO1    |
| 0.002404297 | 1           | 0.601496564 | -0.33826 | 0.00613  | -0.26029 | LPP1             |
| 0.002447746 | 0.936093775 | 0.994517386 | -1.71769 | -0.12084 | -0.29943 | None             |
| 0.002447985 | 0.25429907  | 0.863302781 | -0.50847 | 0.268245 | -0.20229 | MBB1             |
| 0.002449263 | 0.996960041 |             | 1        | 0.678878 | -0.02174 | 0.096345 YPR014C |

|             |             |             |            |          |          |                  |
|-------------|-------------|-------------|------------|----------|----------|------------------|
| 0.002453326 | 0.147016798 | 0.894445004 | 0.282039   | 0.181706 | -0.09849 | FIS1             |
| 0.002477014 | 0.080149997 |             | 1          | 0.338631 | -0.257   | -0.04854 PTP3    |
| 0.002477413 | 0.837441872 | 0.559860815 | -0.54131   | 0.074283 | 0.447544 | DCI1             |
| 0.002478313 | 0.040340762 | 0.975062924 | 0.24454    | -0.2115  | -0.04998 | CSI2             |
| 0.00248634  | 0.47499087  | 0.874977083 | -0.23295   | -0.084   | -0.08885 | TAF11            |
| 0.002499272 | 0.370508284 |             | 1          | -0.26461 | -0.11588 | 0.02088 EFM3     |
| 0.002517712 | 0.690362072 | 0.860187522 | 0.221141   | 0.050416 | 0.090253 | ARL1             |
| 0.002517712 | 0.266929182 | 0.910199402 | 0.191613   | -0.10077 | 0.06178  | MTR3             |
| 0.002518682 | 0.987715638 | 0.078502393 | -0.22879   | -0.00906 | 0.385809 | RPB10            |
| 0.002545222 | 0.157752978 | 0.897848413 | -0.26669   | -0.16808 | 0.092472 | SPT14            |
| 0.002546803 | 0.000646782 | 0.428049321 | -0.24083   | 0.31262  | 0.239928 | MRPL15           |
| 0.002562667 | 0.090430839 | 0.737036218 | -0.46836   | 0.340715 | 0.272798 | YKL133C          |
| 0.002568522 | 0.000483252 | 0.967394603 | 0.263761   | 0.350691 | -0.05912 | YBR287W          |
| 0.002570465 | 0.007166364 | 0.565513961 | -0.2922    | 0.315776 | -0.23928 | SCO1             |
| 0.002573603 | 0.02375103  | 0.154422599 | 0.476377   | 0.448083 | -0.69886 | IDP3             |
| 0.002573986 | 0.052551709 |             | 1          | 0.295379 | -0.24403 | 0.005584 REB1    |
| 0.00258561  | 0.320232732 | 0.086874857 | -0.27772   | 0.132469 | 0.460015 | YCR043C          |
| 0.002586581 | 0.968013408 | 0.206688593 | -0.19492   | -0.01069 | 0.264875 | RLP7             |
| 0.002589416 | 0.172225804 | 0.621769539 | -0.21414   | -0.13155 | 0.161475 | UTP30            |
| 0.002589416 | 0.295659    | 0.883095126 | 1.055813   | -0.53824 | 0.395389 | YCR022C          |
| 0.002593107 | 0.781247106 | 0.952606365 | 0.246953   | -0.04258 | -0.06084 | INN1             |
| 0.00259383  | 0.148485947 | 0.333300106 | -0.25404   | 0.163022 | 0.286945 | GTF1             |
| 0.002618145 | 0.502826515 | 0.722814204 | -0.32375   | -0.11078 | 0.196337 | BSC6             |
| 0.002619671 | 0.955475747 | 0.568872092 | 0.309614   | 0.019364 | -0.25402 | SPC29            |
| 0.002630781 | 0.686388856 | 0.577843626 | 0.253615   | -0.05886 | -0.20547 | DOP1             |
| 0.00264794  | 1           | 0.714788215 | 1.23756    | -0.02436 | -0.79019 | YGL260W          |
| 0.002661312 | 0.196724669 |             | 1          | -0.27122 | 0.15924  | -0.02198 YPR172W |
| 0.002675733 | 0.752831669 | 0.851392759 | 0.424665   | 0.082049 | -0.17915 | SSN8             |
| 0.002678071 | 0.528480393 | 0.689558052 | -0.17947   | 0.058672 | 0.119833 | RPC37            |
| 0.002678389 | 0.879819172 | 0.924605282 | 0.950309   | -0.11028 | -0.28745 | None             |
| 0.002696186 | 0.36016606  | 0.317858436 | -1.57482   | 0.681979 | 1.798854 | None             |
| 0.002700381 | 0.931613602 | 0.962684605 | 0.368596   | 0.029469 | 0.085477 | VAB2             |
| 0.002701287 | 0.659284357 | 0.348820609 | -0.20935   | -0.05213 | -0.23267 | SEC20            |
| 0.00270658  | 0.280697279 | 0.902712809 | -0.2371    | -0.12218 | 0.080785 | RNA14            |
| 0.002723808 | 0.509434188 | 0.223097491 | -0.1703    | -0.05793 | 0.227461 | ZRC1             |
| 0.002727604 | 0.936226276 | 0.725591402 | -1.36196   | -0.10024 | 0.847709 | YKL097C          |
| 0.002732237 | 0.98811108  | 0.75616091  | 0.211304   | -0.00834 | 0.118552 | NIF3             |
| 0.002739957 | 0.030006572 | 0.306618286 | 0.239058   | -0.21952 | -0.28241 | UF01             |
| 0.002757181 | 0.163671009 | 0.333575772 | -0.20285   | 0.127156 | 0.230531 | TDH3             |
| 0.002764387 | 0.83092898  | 0.390228331 | 0.457804   | 0.066275 | -0.4827  | RMD6             |
| 0.002772855 | 0.726198088 |             | 1          | -0.31024 | -0.06479 | 0.01474 EXO5     |
| 0.002778025 | 0.490597664 | 0.029656197 | 0.240921   | 0.085289 | -0.48684 | SSK1             |
| 0.002792885 | 0.914039764 | 0.975984512 | 0.288584   | -0.02645 | -0.05938 | STB6             |
| 0.002792907 | 0.295659    | 0.005410787 | -0.23105   | -0.11607 | 0.564443 | EFG1             |
| 0.002816682 | 0.030231646 |             | 0.820956   | 0.28737  | -0.26448 | 0.135876 BUD2    |
| 0.002822252 | 0.443199053 | 0.889079564 | -0.40142   | -0.15509 | 0.145878 | YIL092W          |
| 0.002828937 | 0.644005887 |             | 0.37953299 | 0.170011 | -0.04417 | 0.183414 SSB2    |
| 0.002832792 | 0.004058934 | 1.88117E-06 | 0.254341   | -0.29607 | -0.91304 | MET14            |
| 0.002854721 | 0.953016479 |             | 0.56134476 | -0.20126 | 0.013079 | 0.16868 EFM5     |
| 0.002857114 | 0.385272897 | 0.974194652 | -0.3854    | 0.165054 | -0.08017 | YKL070W          |
| 0.002860928 | 0.093744452 | 0.433186531 | 0.16704    | -0.12367 | -0.16783 | BAT1             |
| 0.002861208 | 0.210176827 | 0.972387712 | 0.31944    | -0.1862  | -0.06764 | STE13            |
| 0.002866552 | 0.049421861 |             | 1          | 0.308496 | -0.26164 | 0.047246 RIF1    |
| 0.002881489 | 0.759733432 | 0.158209764 | -0.16325   | 0.030574 | 0.242326 | SUP45            |

|              |              |              |           |           |           |                   |
|--------------|--------------|--------------|-----------|-----------|-----------|-------------------|
| 0. 002882456 | 0. 358333717 | 0. 688473731 | 0. 252521 | 0. 114967 | -0. 17062 | YJR142W           |
| 0. 002884125 | 0. 00758047  | 1            | -0. 28914 | 0. 314289 | 0. 013133 | MSY1              |
| 0. 002889586 | 0. 716376728 | 1            | -0. 90454 | 0. 189544 | 0. 040079 | None              |
| 0. 002890681 | 0. 069457617 | 0. 018502313 | -0. 22957 | -0. 18068 | 0. 496927 | RRP12             |
| 0. 002931575 | 0. 670263285 | 0. 518188337 | 0. 352587 | 0. 08597  | -0. 31618 | YMR1              |
| 0. 002934206 | 0. 67815339  | 0. 717477893 | 0. 531146 | -0. 12812 | -0. 33355 | None              |
| 0. 002937336 | 0. 496585998 | 0. 92748894  | 0. 253245 | 0. 089275 | -0. 07445 | YNL095C           |
| 0. 002940258 | 0. 755185708 | 0. 741851259 | -0. 20011 | -0. 03834 | -0. 11666 | AIP1              |
| 0. 00296719  | 0. 758880003 | 0. 998440996 | 0. 185222 | -0. 03522 | 0. 029717 | DOT6              |
| 0. 002967643 | 0. 504279413 | 1            | -1. 3914  | 0. 455244 | 0. 16378  | None              |
| 0. 002974155 | 0. 233215762 | 0. 084446467 | -0. 99067 | -0. 55014 | -1. 81091 | YOL013W- <i>f</i> |
| 0. 002981125 | 0. 630246179 | 0. 30954724  | 1. 355819 | 0. 367476 | -1. 63013 | GAL7              |
| 0. 003015403 | 0. 250649618 | 0. 915496392 | -0. 29757 | 0. 161875 | 0. 09481  | BMT2              |
| 0. 00303553  | 0. 004247119 | 1            | 0. 213999 | -0. 24949 | -0. 02258 | EGT2              |
| 0. 003046891 | 0. 847132765 | 0. 976159573 | -0. 33654 | -0. 04523 | 0. 069657 | MFM1              |
| 0. 003063786 | 0. 152125016 | 0. 652552516 | 0. 333023 | -0. 21801 | -0. 24256 | PDR1              |
| 0. 003073259 | 0. 410813266 | 1            | -0. 18541 | -0. 07687 | -0. 00655 | YIF1              |
| 0. 003078442 | 0. 514774579 | 0. 976568193 | -0. 94186 | 0. 312974 | 0. 192086 | None              |
| 0. 003089132 | 0. 176258659 | 0. 522788552 | 0. 848603 | -0. 53668 | -0. 76127 | YDR029W           |
| 0. 003092299 | 0. 986843508 | 0. 080581045 | 0. 199095 | 0. 00825  | -0. 34054 | PHO8              |
| 0. 003101406 | 0. 394478226 | 1            | 0. 187054 | 0. 080132 | -0. 02565 | ENT3              |
| 0. 003122282 | 0. 921788255 | 0. 190795777 | -1. 40077 | -0. 11673 | 2. 072944 | None              |
| 0. 003127467 | 0. 060253788 | 0. 949031652 | 0. 302347 | -0. 24814 | 0. 077566 | OAF3              |
| 0. 003136008 | 0. 68290437  | 0. 847404354 | -1. 12535 | -0. 25896 | 0. 510374 | YGR146C- <i>f</i> |
| 0. 003154256 | 0. 568378999 | 0. 845726915 | 1. 740235 | -0. 53392 | -0. 85262 | None              |
| 0. 003154256 | 0. 63816324  | 0. 937984736 | -0. 77153 | -0. 20347 | -0. 2091  | SPT4              |
| 0. 003158959 | 0. 002099596 | 0. 746737164 | -0. 26274 | 0. 321658 | -0. 1514  | ZTA1              |
| 0. 003222836 | 0. 972383608 | 0. 89719832  | -0. 24251 | 0. 012613 | -0. 08615 | KIN3              |
| 0. 003222911 | 0. 608133376 | 0. 457578646 | -0. 17121 | -0. 04899 | -0. 1681  | CRN1              |
| 0. 00326275  | 0. 738785777 | 0. 744376434 | -0. 77784 | 0. 156702 | 0. 452505 | YGL204C           |
| 0. 00326347  | 0. 527787705 | 0. 313527933 | 0. 778065 | 0. 261738 | -0. 92328 | None              |
| 0. 003267287 | 0. 572927078 | 0. 689558052 | -1. 0971  | 0. 326984 | 0. 752777 | None              |
| 0. 00326966  | 0. 295242295 | 0. 731592804 | -0. 70316 | 0. 352989 | -0. 43127 | None              |
| 0. 003269877 | 0. 301040651 | 0. 89043028  | 0. 503051 | 0. 255317 | 0. 183779 | None              |
| 0. 003283584 | 0. 304299791 | 0. 516090954 | 2. 497504 | -1. 25013 | 2. 330526 | None              |
| 0. 003285547 | 0. 231636316 | 1            | 0. 241907 | -0. 1379  | 0. 036665 | SEC12             |
| 0. 003315621 | 0. 995096172 | 0. 666296417 | 0. 236658 | 0. 008493 | -0. 16962 | RNA15             |
| 0. 003326212 | 1. 70069E-06 | 0. 053817845 | -1. 69797 | 3. 027731 | -4. 31052 | YIL102C           |
| 0. 003326212 | 0. 04046433  | 1            | -0. 22585 | 0. 198842 | 0. 024465 | RSM24             |
| 0. 003364098 | 0. 805737746 | 1            | -0. 33335 | 0. 053393 | -0. 00408 | MTW1              |
| 0. 003379353 | 2. 58336E-05 | 0. 027182603 | 0. 258504 | 0. 408258 | -0. 53658 | TPS2              |
| 0. 00339323  | 0. 120736136 | 0. 89826709  | -0. 5631  | 0. 38882  | -0. 20079 | YBR209W           |
| 0. 003425529 | 0. 0293299   | 0. 98500242  | 0. 323938 | -0. 30555 | 0. 060171 | SPA2              |
| 0. 003432279 | 0. 004064999 | 0. 901390836 | -0. 67501 | 0. 780201 | 0. 234013 | DIA3              |
| 0. 003439547 | 0. 767134842 | 0. 716456431 | -0. 19201 | 0. 035486 | -0. 12203 | SMF2              |
| 0. 003443243 | 0. 041921745 | 0. 761176355 | -0. 23108 | 0. 202608 | 0. 130597 | MRPL9             |
| 0. 003449986 | 0. 781988292 | 0. 969781978 | 0. 362153 | 0. 063793 | 0. 081602 | CDC26             |
| 0. 003456234 | 0. 382143759 | 0. 786584362 | -0. 26034 | -0. 1152  | 0. 137682 | EAF1              |
| 0. 003476677 | 0. 985620143 | 0. 971609311 | -0. 25969 | 0. 011186 | 0. 056483 | IRA1              |
| 0. 00348977  | 0. 065404264 | 1            | -0. 27943 | 0. 225512 | 0. 03601  | AIM23             |
| 0. 003490267 | 0. 182884497 | 1            | 0. 292601 | 0. 182087 | -0. 0415  | VPS20             |
| 0. 003493631 | 0. 082198263 | 0. 046842154 | -0. 20899 | -0. 16194 | 0. 403057 | YNR029C           |
| 0. 003511019 | 0. 212379348 | 0. 92578246  | 0. 243036 | -0. 1439  | -0. 0737  | SKI2              |
| 0. 003511179 | 8. 12485E-06 | 0. 001631856 | 0. 17834  | 0. 295812 | 0. 489296 | ENO1              |



|             |             |             |          |          |          |         |
|-------------|-------------|-------------|----------|----------|----------|---------|
| 0.003521583 | 0.557155923 | 1           | 0.17382  | 0.055814 | 0.004621 | YCK2    |
| 0.00352835  | 1           | 0.972387712 | -0.89095 | -0.02285 | 0.191653 | PAU2    |
| 0.003545362 | 0.629241061 | 0.995247182 | 0.250069 | -0.06908 | 0.042381 | RKR1    |
| 0.003597663 | 0.759288226 | 0.719999469 | -0.24342 | -0.04687 | -0.15432 | SNP1    |
| 0.003614293 | 0.804679845 | 0.561585828 | 0.318297 | -0.05216 | -0.27309 | TAX4    |
| 0.0036321   | 0.795533688 | 0.864764354 | 0.226961 | -0.03834 | 0.094175 | PSH1    |
| 0.003637858 | 0.38298392  | 0.89826709  | -0.21005 | 0.09312  | -0.07489 | VPS60   |
| 0.003652591 | 0.050780234 | 1           | 3.531928 | -3.24876 | -4.44    | None    |
| 0.003652922 | 0.888343159 | 0.567844831 | -0.77797 | -0.0853  | -0.67465 | None    |
| 0.003658085 | 1           | 0.081519515 | 0.198274 | 0.000438 | -0.34385 | LEU4    |
| 0.003659919 | 0.505136536 | 0.673355127 | -0.93448 | 0.323166 | 0.66036  | MEI4    |
| 0.003662237 | 9.11881E-08 | 0.283481217 | -0.26579 | 0.51122  | 0.33375  | SPI1    |
| 0.003698799 | 0.867434951 | 0.69828171  | 0.261367 | 0.032909 | -0.17749 | PBA1    |
| 0.003714358 | 0.027086984 | 0.018502313 | -0.27317 | 0.259632 | 0.605122 | RPS29A  |
| 0.003714358 | 0.186602961 | 0.489652715 | 0.209435 | 0.13006  | 0.200626 | CMD1    |
| 0.003714358 | 0.057147327 | 0.615987044 | 0.203797 | -0.1717  | -0.161   | LYS2    |
| 0.003725098 | 0.300891646 | 0.708809273 | 0.380723 | 0.195742 | -0.25113 | SRL2    |
| 0.003755925 | 0.673663394 | 0.959222058 | 0.20199  | -0.05006 | -0.05003 | RSC9    |
| 0.003778649 | 0.601019912 | 1           | 0.95988  | -0.28775 | -0.06429 | PTH4    |
| 0.003791652 | 0.298926458 | 1           | 0.243696 | -0.12619 | 0.016006 | SAC7    |
| 0.003810214 | 0.147800185 | 0.529437087 | -0.29295 | 0.195419 | 0.264992 | MTQ1    |
| 0.003824947 | 0.379077824 | 0.464867211 | -0.23924 | -0.10773 | -0.23742 | HOS3    |
| 0.003825338 | 0.782318684 | 0.475256698 | -0.23175 | 0.040818 | 0.226937 | LSM6    |
| 0.003826564 | 0.582144103 | 0.867310986 | 0.429051 | 0.132452 | 0.177602 | PRR2    |
| 0.003834321 | 0.496585998 | 0.848379499 | 0.275982 | -0.10008 | 0.122145 | BCK1    |
| 0.003866421 | 0.269333208 | 1           | 0.28888  | -0.15804 | -0.04167 | PAN2    |
| 0.003866855 | 0.916242282 | 0.920011392 | -2.375   | -0.19886 | -0.79564 | None    |
| 0.003869096 | 0.336744763 | 0.113134528 | -0.21963 | 0.106094 | 0.360919 | SRP14   |
| 0.003905378 | 0.039464542 | 1           | -0.17466 | -0.15788 | -0.01085 | GAS5    |
| 0.003905609 | 0.145608335 | 0.910199402 | -1.35775 | -0.90144 | -0.50379 | None    |
| 0.003941274 | 0.805302069 | 0.990208543 | 0.223652 | 0.036754 | 0.040233 | PPX1    |
| 0.00396013  | 0.230450293 | 0.834791774 | 0.23915  | -0.13941 | -0.11217 | UBA2    |
| 0.003967245 | 0.013622527 | 0.341937853 | 0.257229 | -0.27323 | 0.301142 | GLN4    |
| 0.003972848 | 0.051155386 | 0.113089839 | -0.1963  | 0.168816 | 0.323635 | TOM20   |
| 0.003974097 | 0.231604832 | 0.723698581 | 0.171448 | -0.09957 | -0.10834 | MEX67   |
| 0.003994259 | 0.801071005 | 1           | 0.364241 | 0.061008 | -0.05634 | YPL067C |
| 0.004007109 | 0.03630245  | 0.875200775 | 0.356687 | -0.32998 | 0.14294  | SPT6    |
| 0.004017789 | 0.167905851 | 0.862828907 | 0.276361 | 0.178967 | 0.116946 | YDL157C |
| 0.004032413 | 0.456859829 | 0.746636456 | -0.18373 | -0.07193 | -0.10872 | GND1    |
| 0.00405013  | 0.145620859 | 1           | 0.372835 | -0.25476 | 0.045162 | PEP3    |
| 0.00414983  | 0.135026933 | 0.681411478 | -0.25293 | -0.17571 | 0.179385 | PMD1    |
| 0.00414983  | 0.065875072 | 0.836800595 | 0.538764 | 0.445301 | -0.25059 | YGR053C |
| 0.004167688 | 0.552448072 | 0.651238461 | -0.19399 | 0.063531 | 0.145972 | RIM1    |
| 0.004167688 | 0.599853194 | 0.971609311 | 0.221125 | -0.06638 | -0.04936 | SSL2    |
| 0.004174785 | 0.352413161 | 0.207271346 | -0.22954 | 0.108788 | 0.326552 | TRX1    |
| 0.004180083 | 0.373168526 | 0.16733912  | 0.216616 | 0.099691 | -0.32772 | TPK2    |
| 0.004180083 | 0.778192419 | 0.803017727 | 0.206858 | 0.037637 | -0.10644 | BIM1    |
| 0.00422965  | 0.062448847 | 0.82890057  | 0.297883 | 0.248834 | -0.14272 | INO4    |
| 0.004246304 | 0.597836233 | 0.532886511 | -0.45087 | 0.134641 | -0.40889 | YLR112W |
| 0.004246304 | 0.267158526 | 0.989003553 | -0.43744 | -0.24091 | 0.080684 | IMA5    |
| 0.004283544 | 0.207400802 | 0.614405454 | 0.35821  | 0.218036 | 0.287912 | YIL024C |
| 0.00428833  | 0.3567311   | 0.735885155 | -0.20977 | -0.09935 | -0.12946 | PCL1    |
| 0.004315745 | 0.000630711 | 0.003119282 | 0.207686 | 0.286259 | 0.556094 | AHP1    |
| 0.00431816  | 0.853297263 | 0.750071687 | 0.169678 | -0.02325 | -0.1008  | RVS167  |

|              |              |              |             |           |           |                   |
|--------------|--------------|--------------|-------------|-----------|-----------|-------------------|
| 0. 004322357 | 0. 90728766  | 0. 287597168 | -0. 33359   | -0. 03299 | -0. 42193 | GTT2              |
| 0. 004368159 | 0. 888561341 | 0. 971609311 | 0. 333975   | -0. 03793 | -0. 07478 | RAD1              |
| 0. 004380662 | 0. 619870553 | 0. 872146172 | 0. 228652   | -0. 06597 | -0. 09324 | RAD7              |
| 0. 004384158 | 0. 479322493 |              | 1           | -0. 30635 | -0. 11586 | -0. 03213 BRL1    |
| 0. 004396353 | 0. 707431312 |              | 1           | -0. 25486 | 0. 058696 | -0. 00061 RBL2    |
| 0. 004403025 | 0. 968013408 | 0. 320515456 | -1. 59421   | 0. 089988 | -2. 09289 | MEI5              |
| 0. 004439245 | 0. 533524502 | 0. 828700369 | 0. 237047   | 0. 081103 | -0. 11462 | EAF7              |
| 0. 004470153 | 0. 0969018   |              | 1           | 0. 279722 | -0. 21505 | -0. 00132 RAX2    |
| 0. 00451116  | 0. 125172898 | 0. 033854211 | -0. 23139   | -0. 16572 | -0. 48222 | MIL1              |
| 0. 004522093 | 0. 631878695 | 0. 702041373 | -0. 2823    | 0. 078728 | 0. 193089 | YGL159W           |
| 0. 004528628 | 0. 743899621 |              | 1           | -0. 23413 | -0. 04875 | -0. 00724 AKR2    |
| 0. 004532687 | 0. 658725803 | 0. 758181494 | -0. 3166    | -0. 08303 | 0. 185101 | YHL026C           |
| 0. 004535696 | 0. 938960046 |              | 1           | 0. 201234 | 0. 015757 | -0. 01304 DID4    |
| 0. 004551154 | 0. 413532829 |              | 1           | 3. 493383 | 1. 314767 | 1. 470591 Q0255   |
| 0. 004556404 | 0. 761222633 | 0. 935686072 | -0. 23722   | -0. 04619 | -0. 06775 | RNH1              |
| 0. 004567626 | 0. 468207431 | 0. 757681998 | -0. 21816   | -0. 08489 | -0. 12806 | OSW7              |
| 0. 00458294  | 0. 582169769 | 0. 786892522 | -1. 04258   | -0. 3219  | -0. 56485 | SP013             |
| 0. 004583412 | 0. 276561027 |              | 1           | 0. 405972 | 0. 222971 | -0. 02006 YNL092W |
| 0. 004613444 | 0. 260412922 |              | 1           | -0. 23657 | -0. 13312 | -0. 02381 POS5    |
| 0. 004621717 | 0. 080149997 | 0. 439227871 | -0. 20541   | 0. 164203 | 0. 214782 | GCN4              |
| 0. 004650878 | 0. 587398198 | 0. 295505757 | -0. 25863   | 0. 079916 | -0. 32416 | DFM1              |
| 0. 004665423 | 0. 773263368 | 0. 736753793 | -0. 21644   | 0. 040276 | 0. 134534 | THI80             |
| 0. 004671274 | 0. 690335313 | 0. 585232178 | 0. 277478   | 0. 067487 | -0. 23566 | CHS6              |
| 0. 004705468 | 0. 571690974 | 0. 860381997 | -0. 20038   | 0. 063978 | 0. 086728 | YMR226C           |
| 0. 004705468 | 0. 252400336 |              | 0. 98500242 | 2. 031096 | -1. 19247 | -0. 53794 PRM6    |
| 0. 004709416 | 1            | 0. 822329423 | 0. 20548    | 0. 005103 | 0. 101383 | RSP5              |
| 0. 00471956  | 0. 447812948 |              | 1           | -0. 30126 | -0. 12157 | 0. 006688 SWT1    |
| 0. 004731296 | 0. 562258463 | 0. 575774896 | -0. 27052   | -0. 08843 | 0. 232894 | IMP3              |
| 0. 004764599 | 0. 347850933 |              | 0. 98500242 | -0. 24351 | 0. 117767 | 0. 047489 PMT5    |
| 0. 004771004 | 0. 516700017 |              | 0. 92538789 | 0. 186196 | -0. 06634 | -0. 05843 SER2    |
| 0. 004789651 | 6. 58261E-05 | 0. 236599821 | 0. 420694   | 0. 660266 | -0. 57981 | ATO2              |
| 0. 004833271 | 0. 041496611 | 0. 769965504 | 0. 39541    | 0. 362091 | -0. 22646 | SNN1              |
| 0. 004846412 | 0. 276167395 | 0. 450558485 | -0. 5765    | -0. 31675 | -0. 60278 | YPS6              |
| 0. 004869447 | 0. 930068125 | 0. 712488585 | -0. 24958   | 0. 021195 | -0. 1666  | MSC2              |
| 0. 004881597 | 0. 788215883 | 0. 670294084 | -0. 1795    | 0. 031918 | -0. 13216 | RPD3              |
| 0. 004996805 | 0. 051155386 | 0. 676735966 | -0. 20871   | 0. 183745 | 0. 152169 | MRPL36            |
| 0. 00502125  | 0. 246099917 | 0. 832740675 | 0. 303503   | -0. 17689 | -0. 14673 | BBC1              |
| 0. 005046731 | 0. 52090053  | 0. 690321499 | -0. 25196   | 0. 088861 | 0. 178803 | VMA3              |
| 0. 005053477 | 0. 644005887 | 0. 959977162 | -1. 95332   | 0. 485208 | -0. 57499 | GAT3              |
| 0. 005073602 | 0. 854733623 | 0. 859694751 | -0. 27186   | -0. 03737 | -0. 11919 | VHT1              |
| 0. 005084077 | 0. 0438626   | 0. 758383649 | -0. 3832    | 0. 34599  | -0. 22598 | NGL3              |
| 0. 005088091 | 0. 122091532 | 0. 886876142 | 0. 301967   | -0. 22184 | 0. 118706 | VID22             |
| 0. 005088091 | 0. 576536639 | 0. 981558389 | 0. 201466   | 0. 064558 | -0. 041   | ERV46             |
| 0. 005108256 | 0. 706490906 | 0. 978193638 | -1. 07367   | 0. 24578  | 0. 224605 | SMA1              |
| 0. 005120153 | 0. 019363269 | 0. 930420244 | -0. 27158   | -0. 28218 | 0. 08209  | PPR1              |
| 0. 00512338  | 0. 666928884 | 0. 966118712 | 0. 28649    | -0. 07471 | 0. 069591 | VAC14             |
| 0. 005127661 | 0. 300021637 | 0. 294796767 | 0. 276661   | 0. 147298 | -0. 35211 | DSC3              |
| 0. 005136861 | 0. 16612431  | 0. 318881364 | -0. 43853   | 0. 28974  | 0. 542169 | None              |
| 0. 005140355 | 0. 2344813   | 0. 705630037 | -0. 45281   | 0. 265565 | 0. 309937 | MTC7              |
| 0. 005163442 | 0. 676672695 | 0. 326601143 | -0. 23524   | 0. 059476 | -0. 28714 | GRX4              |
| 0. 005189032 | 0. 482993634 | 0. 368959414 | -0. 36756   | 0. 140117 | -0. 42413 | DSE2              |
| 0. 005189032 | 0. 014121187 |              | 0. 7990478  | 0. 229166 | 0. 247753 | -0. 12178 AMS1    |
| 0. 005192395 | 0. 914594311 |              | 0. 24850108 | -0. 69304 | -0. 06582 | 0. 960264 None    |
| 0. 005207932 | 0. 520733173 | 0. 263024501 | 0. 186064   | -0. 06636 | -0. 2497  | SDS23             |

|             |             |             |          |          |          |                   |
|-------------|-------------|-------------|----------|----------|----------|-------------------|
| 0.00520841  | 0.129372156 | 1           | 0.321927 | 0.232235 | -0.01635 | SCM3              |
| 0.005303665 | 0.500337208 | 1           | 0.32565  | 0.121179 | 0.027551 | PEX14             |
| 0.005305592 | 0.039547582 | 0.486872846 | -1.7974  | -1.68466 | -2.64533 | RNP1              |
| 0.005378158 | 0.995096172 | 0.516783348 | -2.78255 | -0.0855  | 2.711823 | None              |
| 0.005378158 | 0.407136042 | 0.529437087 | -0.18362 | 0.080963 | -0.17195 | VTC4              |
| 0.00538068  | 0.690274157 | 0.591440527 | 0.234103 | 0.057834 | -0.19961 | AKL1              |
| 0.005381119 | 0.321761523 | 0.89987755  | 0.525462 | 0.271539 | 0.194747 | YDR018C           |
| 0.005395821 | 0.826578265 | 0.160504258 | -0.38783 | 0.060648 | -0.6067  | SEI1              |
| 0.005395821 | 0.675205495 | 0.764894106 | -0.18269 | 0.046622 | 0.107322 | YMR099C           |
| 0.005395821 | 0.360876565 | 0.951201607 | 0.221968 | -0.10754 | 0.059531 | PAP2              |
| 0.005427812 | 0.0031883   | 0.251662308 | -0.20101 | 0.252935 | 0.275859 | CPR3              |
| 0.005437789 | 0.601019912 | 0.522217116 | 0.711266 | 0.219562 | 0.679364 | THI4              |
| 0.005467597 | 0.426356042 | 0.929303164 | 0.253045 | 0.108694 | 0.078047 | OCA6              |
| 0.005536392 | 0.447812948 | 1           | 0.23431  | 0.096514 | -0.03944 | AHC2              |
| 0.005552286 | 0.650079178 | 0.978377916 | 0.296438 | -0.08164 | -0.06258 | TPO2              |
| 0.005556503 | 0.011617566 | 0.700382929 | 0.244804 | -0.27603 | -0.17208 | AXL2              |
| 0.00560617  | 0.067063438 | 0.488692236 | 0.327771 | 0.278399 | -0.32659 | PET494            |
| 0.005677663 | 1           | 0.907281575 | -0.25191 | -0.00641 | 0.089503 | GRC3              |
| 0.005680503 | 0.661428602 | 0.025659714 | 0.353743 | 0.095061 | -0.78317 | PKP2              |
| 0.005680503 | 0.884827129 | 0.786584362 | -0.19149 | -0.02307 | -0.10649 | ENV9              |
| 0.005741195 | 0.060253788 | 0.68343153  | -0.18047 | 0.156078 | -0.13171 | SDH2              |
| 0.005741219 | 0.04968337  | 0.488692236 | -0.24051 | 0.216373 | 0.240609 | PAM17             |
| 0.005760942 | 0.145608335 | 0.795907717 | -0.17897 | 0.125689 | 0.097168 | MSS51             |
| 0.005781844 | 0.023154413 | 0.834791774 | -0.30126 | 0.307068 | 0.146453 | IRC24             |
| 0.005792374 | 0.293343157 | 1           | -0.19593 | -0.10689 | 0.004384 | RBS1              |
| 0.005818971 | 0.527039178 | 1           | -3.49198 | -1.04233 | 1.133291 | YER188C- <i>t</i> |
| 0.005848981 | 0.892236467 | 0.733681433 | -0.19559 | 0.022245 | 0.125632 | SDO1              |
| 0.005850843 | 0.003850882 | 0.482222092 | 0.363065 | 0.455148 | -0.36709 | ATG8              |
| 0.005884143 | 0.504240033 | 0.182165955 | 0.370353 | -0.13871 | -0.56633 | GDE1              |
| 0.005896743 | 0.847132765 | 0.689558052 | 0.258276 | 0.037425 | 0.187876 | YSC83             |
| 0.005896743 | 0.17265682  | 1           | 0.287612 | -0.19342 | -0.01635 | DFG16             |
| 0.005900171 | 0.571093193 | 0.93741782  | -0.32188 | -0.10553 | 0.093036 | DPB11             |
| 0.00596838  | 0.49382675  | 0.273681355 | -1.09943 | -0.41255 | 1.495541 | PRM8              |
| 0.005970086 | 0.729652252 | 0.625394004 | -0.27833 | -0.06245 | -0.22671 | YJR056C           |
| 0.005981428 | 0.799968632 | 0.69844865  | -0.30606 | 0.053274 | -0.21763 | YDL176W           |
| 0.005981428 | 0.040357896 | 0.863302781 | 0.220572 | -0.20893 | -0.0971  | VPS16             |
| 0.005991991 | 0.858991565 | 0.699025071 | -0.27206 | -0.03742 | -0.19339 | CDC21             |
| 0.006006905 | 0.780949762 | 0.758049402 | 0.387043 | -0.07292 | -0.23414 | UBR2              |
| 0.006059863 | 0.02681959  | 1           | -0.29196 | -0.2945  | 0.035666 | SEG1              |
| 0.00607525  | 0.170043734 | 0.047279785 | -0.18949 | 0.127166 | 0.385881 | RPL16A            |
| 0.006096639 | 0.196724669 | 0.2597044   | 0.263701 | -0.17086 | -0.36266 | CHA4              |
| 0.006134238 | 0.585153927 | 0.120110561 | 0.245749 | -0.07927 | -0.41773 | MIP1              |
| 0.006144732 | 0.402148664 | 0.511547888 | 0.342605 | 0.155642 | -0.33455 | AEP3              |
| 0.006150967 | 0.514826882 | 0.143940462 | -0.20446 | 0.074784 | 0.334914 | GUK1              |
| 0.006156573 | 0.227918099 | 0.872290708 | -0.25448 | 0.154807 | 0.107219 | CAB5              |
| 0.006181822 | 0.039547582 | 1           | 0.222779 | -0.21233 | 0.023946 | TUP1              |
| 0.006185554 | 0.053398368 | 0.714197164 | 0.363444 | -0.3285  | 0.249346 | MLP2              |
| 0.006185554 | 0.422477621 | 0.87592683  | -1.03869 | 0.441199 | 0.430882 | None              |
| 0.006185554 | 0.440961232 | 0.930722711 | -0.32879 | 0.138061 | 0.100804 | NHP6A             |
| 0.00621544  | 0.94982823  | 0.643429399 | -0.52837 | -0.03825 | -0.41773 | PUS2              |
| 0.006216911 | 0.830118162 | 0.680777882 | 0.18252  | -0.02881 | -0.13553 | CLB3              |
| 0.006231539 | 0.825517831 | 1           | 0.15483  | 0.024936 | -0.00105 | FPR3              |
| 0.006233116 | 0.292656551 | 0.680777882 | 0.230165 | -0.12745 | 0.171485 | IQG1              |
| 0.006237798 | 0.066877727 | 1           | 3.348143 | -3.07076 | -4.23721 | PAU19             |

|             |             |             |          |          |          |           |
|-------------|-------------|-------------|----------|----------|----------|-----------|
| 0.00632651  | 0.39761828  | 0.298558417 | -0.43268 | 0.196597 | -0.55925 | CLD1      |
| 0.006333646 | 0.055862382 | 0.223191433 | 0.197831 | -0.17735 | -0.28828 | LEU1      |
| 0.006351286 | 1           | 0.980342156 | 0.351675 | -0.00739 | -0.0743  | FKS3      |
| 0.006353079 | 0.83092898  | 0.667588729 | -0.74694 | 0.115376 | -0.58038 | None      |
| 0.006387195 | 0.740566016 | 1           | -2.50787 | 0.475449 | 0.018812 | None      |
| 0.006413998 | 0.145012799 | 0.822329423 | 0.307707 | -0.22107 | 0.157237 | BEM3      |
| 0.00642135  | 0.551239517 | 0.793455902 | 0.245034 | -0.08492 | 0.136448 | MPH1      |
| 0.006439087 | 1           | 1           | 0.232486 | -0.00172 | -0.01304 | CUE1      |
| 0.006460132 | 0.987136522 | 0.906628341 | 0.302305 | -0.01341 | 0.109838 | BCH2      |
| 0.006460132 | 0.240168063 | 0.929303164 | 0.233596 | -0.14114 | 0.073443 | SEC31     |
| 0.00649255  | 0.157469667 | 0.934548631 | -0.29292 | 0.202554 | -0.08729 | ADY4      |
| 0.00650408  | 0.662481265 | 1           | 0.772227 | 0.210435 | 0.013189 | None      |
| 0.00651182  | 0.788431804 | 0.730473287 | -0.34579 | 0.063084 | -0.22629 | ATP22     |
| 0.006512366 | 0.271844334 | 0.605911675 | -0.41861 | -0.23945 | -0.3571  | YKL050C   |
| 0.006512366 | 0.137340618 | 0.807027851 | -0.21904 | 0.158567 | 0.116726 | CNB1      |
| 0.00652136  | 0.057890074 | 0.385959394 | -0.26055 | -0.23174 | -0.30205 | OAC1      |
| 0.006711373 | 0.010883358 | 0.385511932 | -0.21985 | 0.25218  | -0.25585 | AVT6      |
| 0.006734904 | 0.527787705 | 0.957379336 | 0.191596 | -0.06944 | -0.05087 | YPK1      |
| 0.006750708 | 0.063507884 | 0.537924573 | -0.34113 | 0.296411 | -0.32217 | MBR1      |
| 0.006784515 | 0.113397822 | 1           | 0.276077 | -0.21368 | -0.04461 | ISW2      |
| 0.006790143 | 0.582123297 | 1           | -0.24567 | 0.080151 | 0.033402 | IES4      |
| 0.006805526 | 0.221413078 | 0.186752472 | -0.25704 | 0.159641 | -0.39522 | ATG33     |
| 0.006805526 | 0.083223738 | 0.74594446  | -0.41414 | 0.339963 | 0.25967  | YGR035W-1 |
| 0.006870646 | 0.307144719 | 0.69331605  | -0.36403 | -0.19668 | 0.266527 | ENV11     |
| 0.006879736 | 0.986843508 | 0.083171731 | -0.44591 | 0.020019 | -0.82765 | YPL113C   |
| 0.006893007 | 1           | 0.795458324 | -0.19378 | -0.00521 | -0.10762 | GCS1      |
| 0.006921336 | 0.897124331 | 1           | -3.44278 | -0.31733 | 0.344516 | None      |
| 0.006929538 | 0.757145555 | 0.689558052 | -0.2705  | -0.05646 | -0.19936 | CIN2      |
| 0.006949271 | 0.266200922 | 0.911946622 | -0.25172 | 0.146186 | 0.089149 | RRG9      |
| 0.006954954 | 0.447812948 | 0.990573422 | -0.20597 | 0.086658 | 0.039121 | ELO3      |
| 0.006978243 | 0.795533688 | 0.635310634 | -0.20375 | 0.036673 | 0.166828 | YNL050C   |
| 0.00700888  | 0.999282889 | 0.36188423  | -0.37539 | 0.01233  | -0.45425 | DSE1      |
| 0.007021546 | 0.130529586 | 0.040053356 | -0.19129 | 0.141573 | 0.410578 | RPS24A    |
| 0.007037723 | 0.125195943 | 0.998341694 | 0.197884 | -0.14955 | -0.03488 | NSI1      |
| 0.007055467 | 0.041496611 | 0.817868751 | 0.203211 | 0.194036 | -0.1063  | YBR139W   |
| 0.007073331 | 0.613186069 | 0.285413202 | -0.17816 | 0.054835 | 0.239249 | RSM28     |
| 0.007077005 | 0.125506798 | 1           | 0.205325 | -0.15515 | 0.000317 | RPC34     |
| 0.007092106 | 0.484784326 | 0.954183232 | -0.20871 | -0.0824  | -0.05636 | CDC14     |
| 0.007148339 | 0.199012093 | 0.029197458 | -0.22389 | 0.145411 | 0.502389 | RPL42A    |
| 0.007191221 | 0.011927951 | 1           | 0.358417 | -0.41635 | -0.0624  | OAF1      |
| 0.007207781 | 0.341978326 | 0.263985261 | -0.23595 | -0.12133 | -0.32822 | RDS2      |
| 0.007267641 | 0.155051744 | 0.314660368 | 0.226991 | -0.16192 | -0.29428 | SCD5      |
| 0.007269392 | 0.747684444 | 0.668242189 | -0.23299 | -0.05052 | 0.180739 | YDL129W   |
| 0.007276794 | 0.19327492  | 1           | 0.258212 | -0.17147 | -0.03423 | NUT1      |
| 0.007340384 | 0.715818525 | 0.668242189 | 0.876229 | -0.21121 | 0.685241 | YJL043W   |
| 0.007348323 | 0.679403914 | 0.501759351 | 0.439995 | 0.115836 | -0.44466 | CAT8      |
| 0.007455572 | 0.027559605 | 1           | 3.386363 | 3.4421   | 4.389389 | MATALPHA1 |
| 0.007564325 | 0.533678741 | 0.98500242  | 0.222612 | -0.08072 | 0.045169 | STT4      |
| 0.007594683 | 0.628843645 | 0.609220601 | -2.69629 | 0.666623 | -2.80838 | None      |
| 0.007618704 | 0.158415825 | 0.484474484 | -2.28652 | -1.57305 | -2.90107 | YGR164W   |
| 0.007697826 | 0.428998997 | 0.33267248  | 0.23268  | -0.10345 | 0.296573 | NUP84     |
| 0.007719014 | 0.227967015 | 0.971609311 | 0.357431 | -0.22558 | -0.08656 | LTE1      |
| 0.007748332 | 0.446288659 | 0.978377916 | 0.171949 | 0.073796 | -0.03767 | HIS1      |
| 0.007768445 | 0.119099734 | 0.465091963 | 0.273366 | -0.21259 | -0.29394 | HOT1      |

|             |             |             |          |          |          |           |
|-------------|-------------|-------------|----------|----------|----------|-----------|
| 0.007829981 | 1           | 0.84918567  | -0.34546 | -0.00375 | -0.16362 | RED1      |
| 0.007845928 | 0.024498149 | 0.328122933 | -0.26696 | 0.279037 | -0.34031 | ETR1      |
| 0.007854579 | 0.199496245 | 1           | 0.193099 | 0.127223 | 0.032525 | YPT31     |
| 0.007897844 | 0.15988669  | 0.475525924 | 0.166181 | -0.11805 | 0.176724 | SVF1      |
| 0.007907449 | 0.048569622 | 1           | -0.65342 | 0.604184 | 0.059635 | None      |
| 0.007915217 | 0.27087925  | 1           | -0.21101 | -0.12372 | -0.00603 | LR01      |
| 0.007923313 | 0.089289873 | 0.710774648 | 0.215442 | -0.18037 | -0.15414 | YHP1      |
| 0.007951997 | 0.613304251 | 0.919271701 | -0.36778 | -0.1145  | -0.12681 | SPC98     |
| 0.007961855 | 0.979904046 | 0.004134287 | -0.17678 | -0.00923 | -0.48975 | BNA3      |
| 0.007981175 | 0.490597664 | 0.711541955 | -0.17601 | 0.069408 | -0.12472 | SMM1      |
| 0.007989264 | 0.288253124 | 0.812812583 | -0.22616 | -0.12922 | -0.12124 | KIN4      |
| 0.007997937 | 0.145012799 | 0.463082388 | 0.237262 | 0.174045 | -0.25614 | HAP2      |
| 0.008037971 | 0.109032775 | 1           | 0.271463 | -0.21662 | 0.032133 | SEC5      |
| 0.008048937 | 0.267599743 | 0.909621954 | 0.273596 | -0.16268 | -0.1001  | MY01      |
| 0.008066961 | 0.758146893 | 0.748790103 | -0.25598 | 0.054073 | 0.163153 | ARO80     |
| 0.008103884 | 0.017926511 | 0.120010897 | 0.203097 | 0.224419 | 0.358033 | QRI5      |
| 0.008104593 | 0.006718369 | 0.908303081 | 0.349962 | 0.433308 | 0.128708 | UGX2      |
| 0.008107084 | 0.682492975 | 0.91199009  | 0.185717 | -0.04898 | 0.067072 | APL5      |
| 0.008119871 | 0.885372644 | 0.998804008 | 0.217317 | 0.027096 | -0.03871 | PER1      |
| 0.008122244 | 1           | 1           | 1.118029 | 0.020307 | 0.1773   | YMR084W   |
| 0.008163738 | 0.298926458 | 0.612533403 | -0.23566 | 0.131613 | 0.203719 | TVP23     |
| 0.008177699 | 0.955261579 | 1           | -2.11122 | -0.13195 | -0.21035 | None      |
| 0.008192152 | 0.299260429 | 0.522788552 | 2.152798 | 1.132516 | 2.471309 | YER078W-1 |
| 0.008221422 | 0.77416706  | 0.096205883 | -0.20189 | 0.039912 | 0.37254  | RPC10     |
| 0.008272996 | 0.867220499 | 1           | -3.36609 | 0.373486 | -0.40669 | TDA8      |
| 0.008319201 | 0.984860432 | 0.702041373 | 0.284801 | 0.013888 | -0.20837 | OAZ1      |
| 0.008319201 | 0.295353255 | 0.911946622 | 0.270444 | 0.153561 | 0.098274 | SOH1      |
| 0.008319201 | 0.972056407 | 0.960632458 | -2.46273 | -0.12779 | 0.716661 | YCR041W   |
| 0.008332062 | 0.018092653 | 0.119906082 | 0.356564 | -0.39872 | -0.62973 | PAC11     |
| 0.008462477 | 0.094486252 | 0.179756965 | 1.704873 | 1.379048 | -3.58869 | None      |
| 0.008477195 | 0.948914258 | 0.57885291  | -0.22843 | 0.017356 | -0.20858 | COQ8      |
| 0.00851729  | 0.652939653 | 0.411976149 | -0.19704 | -0.0563  | 0.228173 | DPH1      |
| 0.008527356 | 0.85824178  | 0.47055007  | -2.6737  | -0.32514 | 3.027661 | YBR090C   |
| 0.0085709   | 2.42817E-11 | 2.5162E-07  | 0.237374 | -0.61678 | -1.02364 | MET3      |
| 0.008641551 | 0.142434746 | 0.888371569 | -0.44834 | 0.328722 | -0.1852  | MPC54     |
| 0.008661695 | 0.030733392 | 1           | 3.3479   | 3.403447 | 4.356244 | None      |
| 0.008684985 | 0.083045355 | 0.837234982 | -0.23177 | 0.197072 | 0.117175 | DGA1      |
| 0.00871431  | 0.703189392 | 1           | 0.213539 | -0.05398 | 0.015235 | EX01      |
| 0.008722701 | 0.976677186 | 0.931005601 | 0.206091 | 0.011525 | 0.065552 | LSM12     |
| 0.008722701 | 0.034194294 | 1           | 0.218238 | -0.22166 | 0.019231 | NOT5      |
| 0.008774025 | 0.549432695 | 0.795907717 | 0.530722 | 0.191389 | -0.30293 | HUL4      |
| 0.008869673 | 0.012515571 | 0.737748659 | 0.248772 | -0.29238 | 0.166484 | KIN2      |
| 0.008892394 | 1           | 0.048861894 | -0.16067 | 0.005061 | 0.340801 | BRX1      |
| 0.00894557  | 0.582169769 | 0.846846052 | 0.1651   | 0.055807 | 0.081121 | DUG1      |
| 0.008987209 | 0.990965259 | 0.363479149 | -0.57799 | -0.02417 | -0.71193 | HIM1      |
| 0.008987209 | 0.27789823  | 0.863302781 | -0.23615 | 0.138663 | -0.10836 | ALG7      |
| 0.009057458 | 0.600450086 | 0.990712634 | 0.188266 | -0.0615  | -0.0369  | YMR122W-1 |
| 0.009071339 | 0.310049773 | 0.673402408 | -0.19705 | 0.10946  | 0.154721 | YGR111W   |
| 0.009096991 | 0.64082321  | 0.649502951 | -0.39241 | 0.115692 | -0.32203 | RRT12     |
| 0.009114272 | 0.1765456   | 0.176808405 | 0.182863 | -0.12816 | 0.299114 | SEC63     |
| 0.009143104 | 0.030015186 | 0.157913758 | 0.177649 | -0.18534 | 0.300143 | KAP123    |
| 0.009150325 | 0.500936572 | 1           | -0.1742  | 0.068477 | 0.009558 | VPS21     |
| 0.009183374 | 0.21537104  | 0.718286937 | -0.19348 | 0.125782 | 0.136513 | YLR118C   |
| 0.009202801 | 0.177242556 | 0.7990478   | -0.2079  | 0.144501 | -0.11792 | PDE1      |

|              |              |              |           |           |           |         |
|--------------|--------------|--------------|-----------|-----------|-----------|---------|
| 0. 009268399 | 0. 867986502 | 0. 719999469 | 0. 201904 | 0. 028053 | -0. 14241 | TOR1    |
| 0. 009326449 | 0. 603570842 | 0. 926181253 | -0. 25132 | -0. 08152 | 0. 08452  | YGL176C |
| 0. 00941736  | 0. 011022568 | 0. 781875866 | -0. 59341 | 0. 696362 | -0. 35655 | HXT9    |
| 0. 009521175 | 0. 031370962 | 1            | 0. 380311 | -0. 39787 | 0. 060023 | SPT10   |
| 0. 009522344 | 0. 607278799 | 0. 723053672 | -0. 75063 | -0. 23953 | -0. 54375 | YDR102C |
| 0. 009526733 | 0. 016262327 | 0. 111100599 | -0. 20482 | -0. 23363 | 0. 374234 | MRD1    |
| 0. 009550325 | 1            | 0. 77583136  | 0. 187341 | 0. 003831 | -0. 11455 | SGV1    |
| 0. 009616044 | 0. 720422379 | 1            | 0. 211734 | -0. 05165 | 0. 017915 | SWA2    |
| 0. 009668549 | 0. 441287224 | 0. 895750007 | 0. 292457 | -0. 13053 | -0. 1181  | REG1    |
| 0. 009742832 | 0. 026368793 | 0. 041389982 | -0. 15639 | -0. 16733 | 0. 346807 | RRB1    |
| 0. 009742832 | 0. 018357262 | 0. 493774737 | 0. 190189 | -0. 215   | 0. 201556 | CDC60   |
| 0. 009742832 | 0. 713873054 | 1            | -1. 31213 | 0. 307814 | 0. 11759  | NCB2    |
| 0. 009784763 | 0. 479561477 | 1            | -3. 28898 | 1. 121493 | -1. 23345 | None    |
| 0. 009792379 | 0. 290286754 | 0. 529437087 | -0. 18193 | -0. 10612 | 0. 183379 | NCS6    |
| 0. 009824991 | 0. 073128976 | 0. 954183232 | -0. 20398 | 0. 181025 | -0. 05721 | CYT2    |
| 0. 009994176 | 0. 809230565 | 0. 950921142 | 0. 181354 | 0. 032617 | -0. 05227 | SEC72   |
| 0. 010054233 | 0. 223168514 | 0. 960632458 | -0. 17247 | 0. 112087 | 0. 047071 | ABF2    |
| 0. 010059135 | 0. 015064016 | 1            | 0. 249549 | -0. 29089 | 0. 022428 | MSH6    |
| 0. 0100897   | 0. 071910894 | 1            | 0. 203755 | -0. 18378 | 0. 034768 | MSA1    |
| 0. 01011029  | 0. 855703098 | 1            | 0. 309661 | -0. 04626 | -0. 03859 | CIP1    |
| 0. 010148846 | 0. 730766871 | 0. 546032589 | 0. 193588 | 0. 046112 | -0. 19063 | MDR1    |
| 0. 010161087 | 0. 693233428 | 1            | 0. 281415 | 0. 07409  | 0. 028916 | DCN1    |
| 0. 010167473 | 0. 763546663 | 0. 735885155 | -0. 24757 | 0. 05224  | 0. 168738 | INA22   |
| 0. 010195521 | 0. 607278799 | 0. 711541955 | -0. 2009  | 0. 065314 | 0. 146642 | PBP4    |
| 0. 010251857 | 0. 586124484 | 0. 978338942 | 0. 206726 | -0. 07068 | -0. 04703 | GLE1    |
| 0. 010252513 | 0. 000304987 | 0. 711541955 | -0. 3134  | 0. 492178 | 0. 227969 | BLI1    |
| 0. 010273895 | 0. 000571682 | 0. 264879577 | -0. 38036 | 0. 575999 | -0. 54506 | ICS2    |
| 0. 010365681 | 0. 023260849 | 0. 898464555 | 0. 278743 | 0. 306087 | 0. 112013 | PEX10   |
| 0. 010439544 | 0. 565975794 | 0. 647440092 | -0. 87418 | 0. 302914 | -0. 75058 | SPR3    |
| 0. 010465096 | 0. 073236167 | 1            | 0. 217199 | -0. 19593 | 0. 002407 | SLY1    |
| 0. 010498869 | 0. 604490537 | 1            | 3. 236749 | 0. 963321 | 1. 094998 | None    |
| 0. 010502169 | 0. 080547625 | 0. 659843375 | -0. 22539 | 0. 19745  | 0. 185679 | FYV4    |
| 0. 010502169 | 0. 000649548 | 0. 789517744 | 0. 229606 | 0. 349362 | -0. 13614 | RRF1    |
| 0. 010518879 | 0. 939477921 | 0. 92745323  | -0. 23689 | -0. 02016 | -0. 08013 | TRK2    |
| 0. 010567334 | 0. 954336914 | 0. 608460014 | 0. 299051 | 0. 022046 | -0. 26884 | SKP2    |
| 0. 010605283 | 0. 475062233 | 0. 962145993 | 0. 181177 | -0. 0769  | -0. 04928 | MUM2    |
| 0. 010614167 | 0. 045989617 | 0. 69579659  | 0. 197803 | -0. 19587 | -0. 1523  | BNI5    |
| 0. 010669516 | 0. 177202487 | 0. 446640364 | 0. 422645 | -0. 3032  | -0. 48189 | WSC4    |
| 0. 010669516 | 0. 055657167 | 0. 867548    | -0. 208   | 0. 196721 | 0. 096227 | MRPL32  |
| 0. 010706249 | 0. 828653187 | 0. 324708204 | -0. 24217 | -0. 04081 | -0. 32294 | CBF1    |
| 0. 010794282 | 0. 656000455 | 0. 672563227 | 0. 244494 | -0. 07175 | -0. 19673 | UBP15   |
| 0. 01089916  | 0. 614870993 | 1            | -0. 69112 | -0. 22118 | 0. 090867 | None    |
| 0. 010953877 | 0. 636888736 | 0. 394712497 | 0. 2735   | -0. 08428 | -0. 33408 | RAD54   |
| 0. 010982818 | 1            | 0. 119718988 | -0. 20783 | 0. 00038  | 0. 380348 | RPC11   |
| 0. 011015956 | 0. 861419309 | 0. 919926509 | 0. 32795  | -0. 04817 | -0. 11707 | YMR087W |
| 0. 011089377 | 0. 469985444 | 0. 070538739 | -0. 20007 | -0. 08599 | 0. 405259 | NOP8    |
| 0. 011101894 | 0. 800876337 | 0. 664126703 | -0. 21171 | -0. 03966 | -0. 17351 | ADE12   |
| 0. 011137456 | 0. 663621022 | 0. 857790511 | -0. 28737 | 0. 082292 | 0. 1388   | TRS20   |
| 0. 011199976 | 0. 023222947 | 0. 907281575 | 0. 816003 | -0. 93234 | -0. 32359 | None    |
| 0. 011221162 | 0. 209863945 | 0. 635840497 | -0. 18589 | 0. 12502  | 0. 160703 | DPH5    |
| 0. 01149768  | 0. 802618659 | 0. 993440716 | -0. 14957 | 0. 027917 | 0. 029371 | SUB2    |
| 0. 011659633 | 0. 101421422 | 0. 869100567 | 0. 236434 | -0. 20046 | -0. 1095  | PIK1    |
| 0. 011805949 | 0. 672577856 | 1            | 0. 212559 | -0. 06018 | 0. 020552 | CDC43   |
| 0. 01183444  | 0. 625526211 | 0. 995015134 | -0. 31936 | -0. 10126 | -0. 06203 | YDR209C |

|             |             |             |          |          |          |               |
|-------------|-------------|-------------|----------|----------|----------|---------------|
| 0.011995036 | 0.498387456 | 0.525280623 | -0.2501  | 0.102076 | 0.259634 | CBS2          |
| 0.012042959 | 0.143756666 | 0.983370642 | 0.189301 | -0.1466  | -0.04189 | PSA1          |
| 0.012066239 | 0.726146888 |             | 1        | -0.42839 | -0.10521 | 0.041028 PIN2 |
| 0.012070344 | 0.0122332   | 0.69956533  | -0.18439 | -0.22493 | 0.142356 | RPO31         |
| 0.01209083  | 1           | 0.768691181 | 0.420438 | -0.00738 | -0.26935 | FRE8          |
| 0.012128415 | 0.542558974 | 0.838974643 | 0.238588 | -0.09049 | -0.12509 | SSK22         |
| 0.012454478 | 0.175100138 | 0.911946622 | -0.26141 | 0.18924  | -0.09909 | YPR011C       |
| 0.012474915 | 0.0122332   | 0.967394603 | -0.21714 | 0.263864 | -0.05781 | CAR2          |
| 0.012738294 | 0.483066965 | 0.47679402  | -0.40605 | 0.1717   | -0.45159 | VBA2          |
| 0.012840985 | 0.805907992 | 0.865255114 | 0.266655 | 0.050082 | -0.12749 | YGR168C       |
| 0.012873348 | 0.526984154 | 0.840202254 | 0.198504 | 0.077818 | 0.104326 | PIS1          |
| 0.012902617 | 0.53361689  | 0.094839053 | 0.238184 | -0.09234 | -0.46453 | SSN3          |
| 0.012905033 | 0.261791204 | 0.05005618  | -0.22798 | 0.143755 | 0.502159 | RPL14A        |
| 0.012953436 | 0.633674911 | 0.807027851 | -0.27378 | -0.08607 | -0.15826 | ATG23         |
| 0.012962906 | 0.829832371 | 0.907281575 | 0.166129 | -0.02868 | -0.06528 | MCA1          |
| 0.012976419 | 0.033800973 | 0.721655021 | -0.24336 | -0.25888 | 0.176979 | DEF1          |
| 0.012984196 | 0.000756119 | 0.002606678 | 0.200303 | 0.31009  | 0.616283 | HSP10         |
| 0.013016135 | 0.934332746 | 0.840393339 | 0.257622 | -0.02401 | -0.13523 | ATG21         |
| 0.013025872 | 0.0122332   | 0.675851417 | 0.20677  | -0.25552 | 0.169912 | NOT3          |
| 0.013068995 | 0.025326351 | 0.643429399 | 0.234487 | -0.26345 | 0.2052   | SMC2          |
| 0.013089961 | 0.709900242 | 0.287639061 | -0.25001 | 0.064895 | 0.359729 | DYN2          |
| 0.013150175 | 0.812797636 | 0.531220921 | -0.26075 | 0.04783  | 0.271213 | AUR1          |
| 0.013205289 | 1           |             | 1        | 3.137478 | 0.041502 | 0.047483 ERR2 |
| 0.013263527 | 0.838286416 | 0.417425061 | -0.54782 | -0.0904  | -0.66641 | None          |
| 0.013422562 | 0.598147339 | 0.565847555 | -0.53126 | 0.180918 | 0.523633 | YLR342W-1     |
| 0.013422562 | 0.159515372 | 0.69828171  | -0.24842 | -0.18792 | -0.19533 | CTF18         |
| 0.013488947 | 0.648018557 | 0.87592683  | -0.39233 | -0.11997 | 0.178963 | BUB1          |
| 0.013516115 | 0.712297953 | 0.202387133 | -0.13095 | -0.03404 | 0.215415 | ARB1          |
| 0.013536156 | 0.475222943 | 0.73632566  | 0.16165  | -0.07063 | -0.11423 | TRP2          |
| 0.013607941 | 0.125195943 | 0.769811029 | 0.16741  | -0.13699 | -0.10876 | PGM1          |
| 0.013653271 | 0.015940778 | 0.301188608 | -0.35295 | -0.42301 | -0.5026  | AUS1          |
| 0.013669191 | 0.005632515 | 0.557096755 | 0.384169 | 0.514973 | 0.387102 | FMP33         |
| 0.013746267 | 0.754471255 | 0.943062457 | 0.237138 | -0.05455 | 0.074078 | ULP1          |
| 0.013800064 | 0.669654465 |             | 1        | 0.279271 | -0.08143 | -0.04623 DOT1 |
| 0.013868744 | 0.455661382 | 0.907281575 | 0.446266 | 0.203269 | -0.17669 | YEL028W       |
| 0.013906756 | 2.94967E-11 | 0.027801813 | 0.444738 | 1.208026 | -1.06911 | TMA10         |
| 0.014027031 | 0.488044682 | 0.94443883  | -0.27388 | 0.116191 | -0.08495 | FM01          |
| 0.014042421 | 0.177075653 | 0.909554543 | 0.239061 | -0.1769  | -0.09389 | STU2          |
| 0.014049137 | 0.836107259 | 0.278240376 | -0.19355 | -0.03263 | 0.286918 | YDL086W       |
| 0.014049137 | 0.650518689 |             | 1        | 1.163632 | -0.35924 | 0.12921 None  |
| 0.014061038 | 1           | 0.639357258 | 0.21928  | -0.00613 | -0.19421 | SWM1          |
| 0.014113073 | 0.050780234 | 0.77583136  | 0.233487 | -0.23579 | -0.15005 | RGA2          |
| 0.014113073 | 0.253255251 | 0.846846052 | -0.19038 | 0.123162 | -0.09849 | APA2          |
| 0.014137091 | 0.384508616 | 0.710200613 | 0.541912 | -0.28398 | 0.419304 | YML003W       |
| 0.014175316 | 0.207250248 | 0.234678175 | -2.59628 | -1.69745 | 5.029321 | YDR114C       |
| 0.014175316 | 0.985763775 | 0.712529354 | 0.216305 | -0.01098 | -0.16433 | YNR061C       |
| 0.014419003 | 0.744889837 | 0.688444366 | -0.19846 | 0.047176 | 0.161291 | HTA2          |
| 0.014621853 | 0.563914752 | 0.567463342 | -0.26395 | 0.098117 | -0.26286 | IMP2          |
| 0.014663401 | 0.427585494 | 0.041614907 | -0.37736 | 0.180359 | -0.87127 | JID1          |
| 0.014678059 | 0.592871104 | 0.702435074 | 0.233646 | 0.082301 | -0.1832  | CHA1          |
| 0.014700076 | 0.055046053 | 0.04678456  | -0.20126 | 0.19883  | 0.457926 | RPS25A        |
| 0.014720913 | 0.726770499 | 0.98500242  | 0.148848 | 0.037648 | -0.03279 | LAT1          |
| 0.014766137 | 0.472847077 | 0.949130483 | 0.20152  | -0.0896  | 0.061647 | MCD4          |
| 0.01478099  | 0.82837317  | 0.191196271 | 0.179518 | 0.031738 | -0.30355 | CST6          |

|             |             |             |            |          |          |                  |
|-------------|-------------|-------------|------------|----------|----------|------------------|
| 0.01481138  | 0.649493592 | 0.335694492 | -0.16006   | 0.049445 | -0.21885 | HEM15            |
| 0.01481138  | 0.513831581 | 0.384202197 | 1.878679   | 0.732102 | 2.681374 | None             |
| 0.014840235 | 0.089795085 |             | 1          | -0.22604 | 0.202112 | -0.02705 YDL144C |
| 0.014909469 | 0.295761003 |             | 1          | 0.180272 | -0.11001 | -0.0196 HAA1     |
| 0.014965949 | 0.246344291 | 0.053017966 | -0.15932   | 0.105    | 0.355282 | RPS1B            |
| 0.014967855 | 0.095680569 |             | 1          | 0.301641 | -0.26893 | 0.017281 THO2    |
| 0.015023977 | 0.017064023 | 0.635840497 | -0.20877   | 0.249682 | 0.187534 | MRPL49           |
| 0.015144831 | 0.006732239 |             | 1          | 0.352261 | -0.47729 | -0.0248 YJU2     |
| 0.015169276 | 0.263785093 | 0.924605282 | 0.179684   | -0.11636 | 0.06522  | QRI1             |
| 0.015257055 | 0.059385215 | 0.969393262 | 0.253511   | -0.25025 | -0.06807 | DAL81            |
| 0.015307178 | 0.347850933 | 0.574102224 | 0.271677   | 0.152005 | -0.26965 | GPI12            |
| 0.015321863 | 0.146023005 | 0.993440716 | -0.24691   | 0.194866 | -0.05035 | MSE1             |
| 0.015389665 | 0.762436308 | 0.920384135 | -0.1976    | 0.044233 | -0.07284 | YIP3             |
| 0.015503397 | 0.746430113 | 0.223381301 | -0.22158   | -0.053   | -0.35898 | PTI1             |
| 0.015567561 | 0.765667428 |             | 0.69579659 | -0.23533 | 0.052087 | -0.18961 ATO3    |
| 0.015621037 | 0.4171016   |             | 1          | 0.26515  | -0.13153 | 0.008167 YDR239C |
| 0.015696972 | 0.236124298 | 0.875100022 | -0.2043    | -0.13805 | -0.09611 | YCG1             |
| 0.01569767  | 0.663939309 | 0.744154405 | -0.19349   | 0.057924 | 0.136198 | YGL242C          |
| 0.015715538 | 0.896286063 | 0.713888298 | 0.239353   | -0.03007 | -0.18366 | PRP3             |
| 0.015717267 | 0.261134686 | 0.507578381 | 0.209268   | 0.136556 | -0.2308  | MMT2             |
| 0.015717267 | 0.97563827  | 0.535437422 | -1.33262   | 0.076394 | 1.46811  | YNL140C          |
| 0.015731164 | 0.031881825 |             | 1          | 0.197768 | -0.21924 | -0.03547 ECM32   |
| 0.015751067 | 0.397361658 | 0.892047539 | 0.248182   | -0.12798 | -0.10793 | MON2             |
| 0.015946965 | 0.730690788 | 0.834202861 | -0.15598   | -0.03933 | 0.086423 | MNN11            |
| 0.016005234 | 0.434111391 |             | 1          | 0.185218 | -0.08955 | 0.004402 NGL2    |
| 0.01609467  | 0.937908022 | 0.761668786 | -0.26085   | -0.02394 | 0.176654 | SMP3             |
| 0.016148906 | 0.979425666 | 0.846846052 | -0.58866   | -0.03379 | 0.309898 | NDT80            |
| 0.016247381 | 0.939931827 | 0.335694492 | -0.22104   | -0.0198  | -0.30611 | RAD14            |
| 0.016248198 | 0.090325697 | 0.929303164 | 0.289988   | -0.26527 | 0.102223 | TRS130           |
| 0.016348135 | 0.048588309 | 0.167222206 | 0.159185   | -0.16496 | 0.285085 | RLI1             |
| 0.016434373 | 0.881859811 |             | 1          | -0.20208 | 0.028305 | 0.024869 AAD3    |
| 0.016451012 | 0.549922765 | 0.840006224 | -0.21807   | 0.084512 | 0.118227 | ERP3             |
| 0.016568181 | 0.09236487  |             | 1          | 0.229999 | -0.20945 | 0.012318 ALR1    |
| 0.016629126 | 0.358812314 |             | 0.368189   | 0.159817 | -0.08908 | -0.21414 PTA1    |
| 0.016649953 | 0.032364503 | 0.031200361 | 0.146471   | -0.16293 | 0.363319 | BFR2             |
| 0.016681358 | 0.729751469 |             | 0.05005618 | 0.228005 | -0.05836 | -0.51937 PIP2    |
| 0.016694205 | 0.86979785  | 0.767199943 | 0.327407   | 0.048679 | -0.21993 | OXP1             |
| 0.016712562 | 0.460638341 | 0.738191837 | 0.152497   | -0.07056 | -0.11002 | SLG1             |
| 0.016712562 | 0.730766871 | 0.985483713 | 0.156241   | 0.0397   | 0.034591 | YIP5             |
| 0.016731517 | 0.950105874 | 0.672010939 | -0.18839   | 0.015395 | -0.16028 | AFG3             |
| 0.016737327 | 0.004542745 | 0.241988403 | -0.20941   | 0.292737 | 0.334581 | ECM15            |
| 0.016778566 | 0.127610291 |             | 1          | 0.213324 | -0.17874 | -0.00363 TIF4632 |
| 0.016864135 | 0.231948367 | 0.617215067 | 0.835878   | 0.574713 | -0.7896  | None             |
| 0.016864135 | 0.48908547  |             | 1          | 0.288519 | 0.126347 | -0.04012 BTT1    |
| 0.01691988  | 0.386354047 | 0.404345893 | -0.27026   | 0.142165 | -0.34534 | PEX27            |
| 0.01691988  | 0.186795666 | 0.634900178 | 0.241753   | -0.18057 | -0.22197 | CDC45            |
| 0.017126994 | 0.598147339 | 0.689558052 | -0.15089   | 0.053508 | 0.12469  | CBF5             |
| 0.017191696 | 0.456434148 |             | 1          | 0.1692   | 0.079033 | -0.03042 PUP3    |
| 0.017216957 | 0.054834295 |             | 1          | 0.30008  | -0.30705 | -0.02015 RCY1    |
| 0.017226663 | 0.676672695 | 0.609183674 | -0.30753   | 0.090055 | 0.294356 | None             |
| 0.017226663 | 0.649028901 | 0.945408772 | -0.23837   | -0.07539 | -0.07587 | TRI1             |
| 0.017250798 | 0.634501741 | 0.702041373 | -0.3095    | 0.100758 | 0.248465 | MHF2             |
| 0.017326009 | 0.900344125 | 0.411752857 | 0.200009   | -0.02475 | -0.25401 | PSY4             |
| 0.017341593 | 0.0104994   | 0.000151825 | 0.289753   | 0.378225 | -1.07846 | GUT2             |



|             |             |             |            |          |          |                |
|-------------|-------------|-------------|------------|----------|----------|----------------|
| 0.017350746 | 1           | 0.293969078 | 0.19686    | 0.000532 | -0.29161 | CPA2           |
| 0.017415134 | 0.440961232 | 0.818523526 | -0.19366   | -0.09302 | 0.113375 | ATC1           |
| 0.017473263 | 0.112620905 | 0.589139583 | -0.20902   | 0.180999 | -0.20615 | CWC27          |
| 0.017473263 | 0.781328521 | 0.915496392 | -0.20559   | -0.04384 | 0.080479 | NAR1           |
| 0.017519747 | 0.748333252 | 0.942108564 | 0.158658   | 0.038503 | -0.0514  | APE4           |
| 0.017588855 | 0.371129486 | 0.859694751 | -0.20657   | -0.11321 | 0.105877 | GPR1           |
| 0.017618421 | 3.15242E-05 | 0.335356848 | -0.17705   | -0.33787 | -0.24792 | SHM2           |
| 0.017693098 | 0.12956062  | 0.563376575 | -0.33584   | -0.28118 | -0.34699 | CSM2           |
| 0.017720611 | 0.368160688 | 0.201505014 | -0.87253   | 0.465831 | -1.55614 | YOR161C-(      |
| 0.017777919 | 0.332602552 | 0.164318185 | -0.15914   | 0.093212 | 0.289495 | RPS24A         |
| 0.017816753 | 0.065898417 | 0.910199402 | 0.294317   | -0.2918  | -0.11907 | RAD50          |
| 0.017862887 | 0.639674212 | 0.870558299 | 0.481253   | 0.157018 | 0.235541 | PDR18          |
| 0.017862887 | 0.052484563 |             | 1          | 3.080651 | 3.135003 | 4.070729 None  |
| 0.017872118 | 0.469895523 | 0.745956748 | 0.185377   | -0.08534 | -0.13189 | WWM1           |
| 0.017914222 | 0.410849697 |             | 1          | -0.19895 | -0.10146 | -0.03499 MKS1  |
| 0.01791653  | 0.335205662 | 0.664126703 | -0.1411    | 0.082346 | -0.12364 | AHA1           |
| 0.01791653  | 0.94036767  | 0.715570823 | -0.37054   | 0.033393 | 0.287448 | None           |
| 0.017968665 | 1           |             | 1          | -0.30494 | -0.00887 | -0.0164 MCM16  |
| 0.017970678 | 0.98811108  | 0.494558503 | -0.97086   | 0.046478 | -1.16164 | None           |
| 0.017983157 | 0.919717643 | 0.868996053 | -0.22811   | 0.024629 | 0.111984 | ALG14          |
| 0.018101898 | 0.408733697 | 0.314080237 | -0.41267   | 0.210017 | 0.600068 | CSN9           |
| 0.018144815 | 0.615223063 |             | 0.7990478  | -0.15588 | -0.05379 | 0.09696 AR07   |
| 0.018151076 | 0.454006913 | 0.840006224 | 0.193139   | 0.091455 | 0.106681 | RIB5           |
| 0.018178482 | 0.229832807 |             | 0.38020077 | -0.13492 | -0.09415 | 0.180038 MNN9  |
| 0.018235032 | 0.000136614 | 0.736753793 | -0.18349   | -0.32881 | -0.13487 | HCM1           |
| 0.018442093 | 0.434023315 | 0.931568877 | -0.24649   | 0.120707 | 0.085258 | HMS2           |
| 0.018503202 | 0.07270256  |             | 1          | -3.18933 | -3.14539 | 3.888102 None  |
| 0.018510137 | 0.567411892 | 0.113089839 | 0.233745   | 0.089852 | -0.46316 | ICL1           |
| 0.018551113 | 0.630109602 |             | 0.41314825 | 0.170053 | -0.05706 | -0.21742 YPP1  |
| 0.018677381 | 2.21536E-07 | 0.007546041 | 0.209888   | -0.48586 | -0.61738 | MET5           |
| 0.018776417 | 0.404461177 | 0.926181253 | 0.254062   | -0.13266 | -0.09395 | IRE1           |
| 0.01881943  | 0.704007409 | 0.919926509 | 0.18665    | 0.052012 | 0.071618 | FAD1           |
| 0.018821014 | 0.206402515 | 0.626092028 | 0.221131   | -0.16192 | -0.20845 | AVT4           |
| 0.018821014 | 0.363817999 | 0.864591739 | 0.298181   | 0.167536 | 0.150619 | ATG38          |
| 0.018853201 | 0.977693292 | 0.901225243 | -0.68501   | -0.04107 | -0.29519 | HES1           |
| 0.018855399 | 0.748550885 | 0.433972501 | 1.644419   | 0.390655 | -2.24895 | None           |
| 0.018983642 | 0.641977934 | 0.489652715 | -0.2644    | 0.085909 | 0.307051 | TIM12          |
| 0.019051475 | 0.230836023 | 0.971609311 | -0.18518   | 0.129499 | -0.04949 | SHE9           |
| 0.019136287 | 0.022992267 |             | 1          | 0.227191 | -0.27304 | 0.042047 CHS3  |
| 0.01916826  | 0.682008236 |             | 0.87592683 | -0.23159 | 0.068029 | -0.11087 REX3  |
| 0.019221359 | 0.330719721 | 0.885657987 | 0.228028   | -0.13661 | -0.10615 | MDM1           |
| 0.019291652 | 0.571956214 |             | 1          | 0.215603 | 0.082362 | 0.029372 IWR1  |
| 0.019344016 | 0.833783236 |             | 0.46824606 | 0.192466 | 0.034551 | -0.23132 NCW2  |
| 0.019344016 | 0.123442499 | 0.976568193 | 0.294808   | 0.254    | 0.075058 | ATG32          |
| 0.019428189 | 0.027303176 | 0.268923553 | 0.219443   | 0.255977 | -0.3433  | GPT2           |
| 0.019448665 | 0.754604732 | 0.259904873 | 0.183121   | -0.04416 | -0.29098 | HAP1           |
| 0.01964179  | 0.608514335 | 0.710913844 | -0.23674   | -0.08402 | 0.190223 | MON1           |
| 0.01969883  | 1           | 0.683800732 | -0.2104    | -0.00261 | 0.1798   | YKE2           |
| 0.019756958 | 0.230929934 | 0.545272974 | 0.140253   | -0.09908 | -0.15139 | ILV5           |
| 0.019812664 | 0.041913401 | 0.971609311 | 0.321289   | -0.35238 | 0.086571 | SLK19          |
| 0.01981356  | 0.075962526 | 0.976378097 | 0.289207   | -0.28325 | -0.07433 | MRC1           |
| 0.019884495 | 0.667862767 | 0.623228732 | 0.24489    | -0.07544 | -0.23386 | CHL1           |
| 0.019919844 | 0.451996377 |             | 1          | 0.278823 | -0.13479 | 0.017698 MAK31 |
| 0.020010277 | 0.04046433  | 0.90423793  | 0.337064   | -0.37303 | 0.145257 | ENT4           |

|             |             |             |          |          |          |           |
|-------------|-------------|-------------|----------|----------|----------|-----------|
| 0.020182527 | 0.015713327 | 0.7990478   | 0.181855 | -0.23168 | 0.115264 | GWT1      |
| 0.020219918 | 0.579364291 | 1           | 0.194675 | 0.073918 | 0.038327 | LAS1      |
| 0.020241427 | 0.836107259 | 0.637177071 | 0.336894 | -0.06019 | 0.31641  | FRE5      |
| 0.02034587  | 0.935433283 | 0.00883753  | 1.296001 | -0.12593 | -4.66333 | None      |
| 0.020361893 | 0.929795254 | 0.931005601 | -0.21913 | 0.02232  | -0.07743 | HEM1      |
| 0.020390194 | 0.113957872 | 0.868996053 | -0.17973 | 0.15876  | 0.09     | TUM1      |
| 0.020390194 | 0.392504595 | 0.927845118 | -0.1647  | -0.08845 | 0.060634 | TOS6      |
| 0.020390194 | 0.044199429 | 1           | -0.2211  | 0.238454 | 0.01145  | SNG1      |
| 0.020444371 | 0.51219348  | 0.046942988 | -0.14518 | 0.062324 | 0.346248 | SAT4      |
| 0.020509834 | 0.0969018   | 0.165466155 | -0.42105 | 0.385219 | 0.777221 | YPT53     |
| 0.020541724 | 2.64271E-08 | 0.888649502 | -0.40074 | 0.974414 | -0.18371 | YER121W   |
| 0.020607074 | 0.492341773 | 0.283481217 | -0.17612 | 0.078435 | 0.273183 | PHO88     |
| 0.020607074 | 0.905759808 | 0.790203342 | -0.14002 | -0.017   | 0.090961 | SRM1      |
| 0.020638696 | 0.729751469 | 0.92806956  | -0.5904  | -0.15427 | -0.21873 | YGL230C   |
| 0.020693798 | 0.51219348  | 1           | -1.08603 | 0.456585 | 0.072388 | ATG39     |
| 0.020719036 | 0.079546525 | 0.067818165 | -0.16324 | -0.1584  | 0.363527 | RRP9      |
| 0.020807665 | 0.738978817 | 0.815666048 | 0.168275 | 0.043014 | 0.102275 | YNL010W   |
| 0.020909908 | 0.448302145 | 0.971609311 | 0.155603 | -0.07589 | 0.042091 | CRM1      |
| 0.020920975 | 0.587680144 | 0.406901206 | 0.227337 | 0.085303 | 0.299236 | HMI1      |
| 0.020938524 | 0.428439515 | 0.771051473 | 0.145733 | -0.07392 | 0.100327 | LHP1      |
| 0.021026516 | 0.762220096 | 0.929303164 | -0.21441 | 0.050316 | -0.07825 | BUB3      |
| 0.021048707 | 0.209974178 | 0.614405454 | -0.19384 | 0.142088 | 0.189558 | SSH1      |
| 0.021104554 | 0.625111025 | 0.639357258 | -0.25947 | -0.08936 | -0.24295 | PDR3      |
| 0.021134791 | 0.130061341 | 0.846591233 | -0.21927 | 0.187385 | -0.12064 | YNG2      |
| 0.021297843 | 0.020785019 | 1           | 0.285491 | -0.35411 | -0.05592 | FIR1      |
| 0.021316996 | 0.129927096 | 1           | 2.927348 | -2.66199 | -3.78039 | YHR214C-I |
| 0.021337728 | 0.000101322 | 0.739091337 | 0.221914 | 0.411151 | 0.165761 | YHR138C   |
| 0.021397583 | 0.2339396   | 0.846845309 | 0.225305 | -0.1607  | -0.12451 | TRS65     |
| 0.021426318 | 0.49382675  | 0.721271027 | 0.234567 | 0.105316 | 0.184447 | MDM32     |
| 0.021569876 | 0.95467013  | 1           | -0.21857 | 0.017594 | -0.02459 | RRP42     |
| 0.021631803 | 0.041877885 | 0.439260184 | -0.17833 | 0.195999 | 0.22616  | ISD11     |
| 0.021694122 | 0.467087012 | 0.911946622 | 0.265647 | -0.12669 | 0.109813 | SOV1      |
| 0.021824231 | 0.228288339 | 1           | 0.236543 | -0.17086 | 0.047734 | KOG1      |
| 0.021824231 | 0.732997545 | 1           | -0.2084  | -0.05453 | 0.028549 | MTE1      |
| 0.02184039  | 0.185910487 | 1           | 0.286086 | 0.221425 | 0.004479 | SAW1      |
| 0.02190314  | 0.842356676 | 0.218256111 | -0.14095 | -0.02465 | 0.243186 | RMT2      |
| 0.02190314  | 0.004542745 | 0.220954671 | 0.693444 | 1.015857 | 1.209635 | YDR182W-I |
| 0.021930009 | 0.443553864 | 0.438612707 | 0.179828 | -0.08935 | -0.2291  | NPL6      |
| 0.021959505 | 0.987928469 | 1           | 0.202585 | 0.010389 | 0.017258 | SYN8      |
| 0.021998468 | 0.095680569 | 0.021504559 | -0.20081 | 0.187435 | 0.543297 | RPP1A     |
| 0.022090529 | 0.07270256  | 0.986945047 | 0.20595  | 0.205433 | -0.04685 | MEH1      |
| 0.02218095  | 0.613747706 | 0.578113103 | 0.191284 | 0.06856  | 0.200113 | FMP41     |
| 0.02218095  | 0.769795979 | 0.733681433 | -0.16296 | -0.03741 | 0.124391 | HAM1      |
| 0.02218095  | 0.051723227 | 0.786137812 | 0.272226 | -0.29191 | -0.18158 | SWE1      |
| 0.022189532 | 0.228288339 | 0.723935587 | 0.19862  | -0.14377 | 0.15554  | GEA2      |
| 0.022209707 | 0.663621022 | 0.91199009  | -0.22928 | -0.07255 | -0.09452 | RIT1      |
| 0.022238272 | 0.958961218 | 0.822329423 | -0.21065 | 0.016308 | -0.12625 | SPP1      |
| 0.022539508 | 0.884663483 | 0.259295923 | 0.134054 | -0.01945 | 0.219205 | YNL190W   |
| 0.02255029  | 0.149952856 | 0.241434728 | 0.926451 | 0.768695 | 1.574494 | None      |
| 0.02255029  | 0.871135401 | 0.860187522 | 0.367352 | 0.056984 | -0.19441 | YMR141C   |
| 0.022592102 | 0.428520424 | 0.299842252 | -1.12824 | 0.553741 | -1.82136 | None      |
| 0.022592102 | 0.6123064   | 0.43642005  | -0.20191 | 0.072581 | 0.259199 | BOL2      |
| 0.022695579 | 0.152035774 | 0.859769494 | 0.19513  | -0.16275 | 0.103897 | HEH2      |
| 0.022759533 | 0.587866346 | 0.203404731 | -0.19481 | 0.073582 | -0.3431  | ISA1      |

|             |             |             |          |          |          |                  |
|-------------|-------------|-------------|----------|----------|----------|------------------|
| 0.022849453 | 0.025661604 | 0.393651782 | 0.444543 | -0.54363 | -0.60199 | CMR1             |
| 0.022851533 | 0.216269794 | 0.974692539 | -0.26745 | 0.196169 | -0.07128 | SNZ1             |
| 0.022865235 | 0.663252335 | 0.976568193 | -0.25061 | 0.079618 | -0.06469 | SLM5             |
| 0.022880825 | 0.058914883 | 0.099133414 | 0.286667 | 0.299488 | -0.59929 | PTC6             |
| 0.022898653 | 0.863630398 |             | 1        | -3.01248 | -0.42292 | 0.469931 YNL184C |
| 0.0229361   | 0.413532829 | 0.621769539 | 0.247455 | -0.13074 | -0.24229 | FAB1             |
| 0.022983827 | 0.138242749 | 0.053709945 | -0.17883 | 0.152526 | -0.42176 | TIM22            |
| 0.022984576 | 0.019248218 | 0.022248686 | 0.141887 | -0.1793  | -0.38368 | ADE3             |
| 0.022988835 | 0.015182854 | 0.643429399 | -0.2352  | 0.303047 | 0.221949 | AIM36            |
| 0.022988835 | 0.124190791 | 0.920656396 | -0.24432 | -0.21574 | 0.095716 | BNR1             |
| 0.023082402 | 0.762436308 | 0.716456431 | -1.20112 | -0.27924 | 0.997828 | YBL100W-(        |
| 0.023082402 | 0.002243865 |             | 1        | -2.17389 | -4.32427 | 2.306079 PAU4    |
| 0.023088473 | 0.995958449 | 0.80413244  | 0.661216 | -0.02897 | -0.4214  | MEK1             |
| 0.023113826 | 0.603384401 | 0.488692236 | 0.248415 | -0.09186 | -0.29794 | SR07             |
| 0.023164027 | 0.444779801 | 0.721655021 | 0.140432 | -0.07012 | 0.11143  | YDR341C          |
| 0.023336499 | 0.091928673 |             | 1        | -0.27417 | -0.26198 | 0.012481 HKR1    |
| 0.023339168 | 0.995958449 | 0.471735065 | -0.25284 | 0.010957 | -0.3106  | STN1             |
| 0.023467074 | 0.199012093 | 0.924605282 | 0.256787 | -0.19742 | -0.09946 | RAD53            |
| 0.023632692 | 1           | 0.889649609 | 0.793858 | 0.01304  | 0.374817 | None             |
| 0.023808167 | 0.788420725 | 0.931005601 | -0.35148 | -0.07627 | -0.12742 | RDS3             |
| 0.023909673 | 0.343034258 | 0.213690034 | -0.18712 | 0.112408 | -0.3282  | SPG5             |
| 0.024024493 | 0.098230855 |             | 1        | -0.17415 | 0.163695 | 0.012158 YBL055C |
| 0.024038334 | 0.204118763 | 0.154422599 | -0.22401 | 0.169395 | 0.432553 | OST5             |
| 0.024058872 | 0.24298702  | 0.753751911 | -2.09572 | -1.42924 | -1.34952 | None             |
| 0.024081366 | 1           |             | 1        | 0.238693 | -0.00763 | 0.021224 PGA1    |
| 0.02426732  | 0.799968632 | 0.630792731 | -0.21686 | -0.0455  | -0.21059 | ORC4             |
| 0.024368719 | 0.905759808 | 0.931005601 | 0.202138 | 0.025264 | 0.073741 | YGR017W          |
| 0.024403937 | 0.000250252 | 0.286953753 | -0.14791 | 0.266581 | 0.233416 | MRP51            |
| 0.024458994 | 0.431584062 | 0.990208543 | 0.159268 | -0.08239 | -0.03605 | CDC53            |
| 0.024466454 | 0.996753756 | 0.949031652 | -0.28121 | -0.01186 | -0.09248 | MME1             |
| 0.024682543 | 0.663202067 | 0.931005601 | -0.22391 | -0.07219 | -0.08184 | TFB2             |
| 0.024849432 | 0.774584831 | 0.976568193 | -0.87448 | 0.197911 | 0.228797 | None             |
| 0.025001961 | 0.451993361 | 0.338005227 | 0.154731 | -0.07728 | 0.229492 | EMW1             |
| 0.025009521 | 0.411661642 | 0.924605282 | -0.22468 | -0.12039 | 0.08753  | ALY2             |
| 0.025193186 | 0.533404723 | 0.909621954 | 0.184319 | -0.07888 | 0.07886  | MDM20            |
| 0.025270828 | 0.717701684 | 0.837446458 | -0.18579 | 0.051867 | 0.10856  | TGS1             |
| 0.025663582 | 0.473710488 | 0.863011842 | 0.25109  | -0.12114 | 0.134372 | SLF1             |
| 0.025838254 | 0.035269944 | 0.967394603 | -0.18004 | -0.21046 | 0.05341  | TRM5             |
| 0.025927745 | 1           | 0.404345893 | -0.14532 | 0.004294 | 0.198408 | EMG1             |
| 0.02593313  | 0.459480897 | 0.882817665 | -0.2373  | 0.116925 | -0.11616 | PRP38            |
| 0.026057743 | 0.35708254  | 0.889649609 | 0.144578 | 0.086362 | -0.0687  | ARC18            |
| 0.026113038 | 0.035269944 | 0.984628847 | 0.147413 | -0.17309 | -0.03621 | NAP1             |
| 0.026159097 | 0.805737746 | 0.104188468 | 0.167959 | 0.034989 | -0.3569  | PFK27            |
| 0.026186457 | 0.207215871 | 0.661759663 | 0.188201 | 0.144248 | 0.176252 | MRPS5            |
| 0.02626568  | 1           | 0.868996053 | -0.53142 | 0.009896 | 0.277684 | None             |
| 0.02627928  | 0.628092366 | 0.910199402 | -1.32818 | -0.46146 | 0.593634 | None             |
| 0.026282466 | 0.944196518 | 0.984628847 | -0.21655 | 0.020029 | -0.05307 | MSR1             |
| 0.026312964 | 0.490597664 | 0.796888121 | -0.86676 | 0.39395  | 0.572354 | DGR1             |
| 0.026312964 | 0.97665513  |             | 1        | -0.29455 | 0.019101 | 0.041416 None    |
| 0.026315064 | 0.022529204 | 0.937944825 | -0.19627 | 0.24576  | 0.068921 | MRPS8            |
| 0.026315064 | 0.665829866 |             | 1        | 0.142249 | 0.046067 | 0.023706 PRO1    |
| 0.026477867 | 0.114955379 | 0.737036218 | -0.24048 | -0.22165 | 0.186936 | PPZ1             |
| 0.026526934 | 0.497910598 | 0.600124333 | -1.06819 | 0.468683 | -1.1726  | BOL1             |
| 0.026533651 | 0.029711358 | 0.358747602 | -0.13961 | -0.16875 | 0.203376 | RRP3             |

|              |              |                                                      |
|--------------|--------------|------------------------------------------------------|
| 0. 026566684 | 0. 467895636 | 0. 385959394 -0. 26634 0. 129734 -0. 37208 MLH2      |
| 0. 026588421 | 0. 891627765 | 0. 981181758 0. 13841 -0. 01941 0. 0351 SUA7         |
| 0. 026588421 | 0. 343957891 | 0. 996250082 0. 15673 -0. 09621 -0. 03393 MCK1       |
| 0. 026886012 | 0. 977693292 | 0. 69828171 0. 207994 -0. 01337 -0. 18176 SNU56      |
| 0. 026886012 | 0. 136029049 | 0. 992955891 0. 181631 -0. 16086 0. 040712 IRC5      |
| 0. 026957387 | 0. 280215048 | 0. 846605423 0. 226774 0. 155507 -0. 12986 KHA1      |
| 0. 026968925 | 0. 530999534 | 0. 589775129 -0. 47953 -0. 20693 0. 5136 MAK3        |
| 0. 026968926 | 0. 38101428  | 1 0. 192749 0. 111159 -0. 01531 RRN9                 |
| 0. 027040454 | 0. 272944905 | 0. 708495578 -0. 21743 0. 15003 -0. 18429 TRP1       |
| 0. 027088419 | 0. 463310994 | 0. 719999469 0. 184745 -0. 09165 -0. 15152 USA1      |
| 0. 02716158  | 0. 724702775 | 0. 860909654 0. 180752 -0. 05051 0. 098381 TSR4      |
| 0. 027225234 | 0. 601388298 | 0. 276492603 0. 174948 0. 066438 -0. 28635 RBK1      |
| 0. 027225234 | 0. 058595183 | 0. 282780148 -0. 19381 0. 207343 -0. 31352 YMR262W   |
| 0. 027360301 | 0. 509434188 | 0. 624068032 0. 166979 -0. 07583 -0. 16748 YHR127W   |
| 0. 027511742 | 0. 867434951 | 0. 974554555 0. 295497 0. 047977 0. 081683 PAC1      |
| 0. 027567565 | 0. 412238661 | 0. 91703897 0. 34319 0. 187226 -0. 14295 CMG1        |
| 0. 027685665 | 9. 33296E-05 | 0. 583172047 0. 147129 -0. 28726 -0. 15822 AC02      |
| 0. 027694545 | 0. 680755208 | 0. 320515456 0. 177263 0. 055609 0. 274325 BUD32     |
| 0. 027717549 | 0. 265919992 | 0. 259414235 0. 155351 0. 109529 0. 262484 RPL4A     |
| 0. 027753346 | 0. 424705765 | 0. 439260184 -0. 77936 -0. 41277 -1. 07886 PUG1      |
| 0. 027771205 | 0. 996753756 | 0. 816819753 -0. 19722 -0. 00852 -0. 12472 SWD1      |
| 0. 027809876 | 0. 87305028  | 0. 434655336 0. 280467 -0. 04463 -0. 37282 MRX4      |
| 0. 027809876 | 0. 186602961 | 0. 863626849 -0. 13563 0. 108516 0. 07285 TIM50      |
| 0. 027809876 | 0. 231864508 | 0. 94082376 0. 174331 -0. 12988 -0. 06101 OCA1       |
| 0. 028071102 | 4. 508E-06   | 0. 578113103 -0. 17959 0. 39502 0. 194276 STF1       |
| 0. 028131895 | 0. 742522958 | 1 -0. 25188 0. 066599 0. 008965 NOP1                 |
| 0. 02818802  | 0. 00018969  | 0. 168268201 -0. 20718 0. 38718 0. 400316 CBP4       |
| 0. 028194949 | 0. 682492975 | 1 -0. 38894 0. 120742 0. 020518 YET2                 |
| 0. 028354411 | 0. 168234936 | 0. 74594446 -0. 18328 0. 151823 0. 13998 GCG1        |
| 0. 028414872 | 0. 425297662 | 0. 690809523 0. 237185 0. 126917 0. 212123 JAC1      |
| 0. 028421572 | 0. 124795835 | 0. 167974771 -1. 29575 -1. 18512 -4. 10221 None      |
| 0. 028469314 | 0. 140485465 | 0. 859694751 0. 14878 -0. 13156 0. 08232 FCP1        |
| 0. 028491219 | 0. 082985083 | 0. 039795632 -0. 16572 0. 166712 0. 431333 RPL18A    |
| 0. 02858112  | 0. 716284575 | 1 0. 217815 -0. 06277 0. 02371 CNM67                 |
| 0. 028622167 | 0. 054541794 | 0. 961437745 -0. 3248 0. 354203 -0. 10206 YBL039W-I  |
| 0. 028622167 | 0. 413532829 | 1 -0. 36922 0. 199663 0. 071149 None                 |
| 0. 028686449 | 0. 959405766 | 0. 803017727 0. 244422 -0. 01975 0. 161703 DCD1      |
| 0. 02884946  | 0. 965705414 | 0. 848379499 -0. 72437 -0. 05462 0. 414732 None      |
| 0. 028868641 | 0. 767194808 | 0. 372850575 -1. 40952 -0. 33405 2. 11556 YIL046W-I  |
| 0. 029214969 | 0. 413532829 | 0. 843716147 0. 210422 -0. 1156 -0. 1238 TFB1        |
| 0. 02928008  | 0. 792133624 | 1 -0. 24488 -0. 0544 -0. 0425 ART5                   |
| 0. 029396839 | 0. 889489616 | 1 -0. 26627 0. 038236 -0. 05252 YAE1                 |
| 0. 029438447 | 0. 100736221 | 0. 553808105 0. 223555 0. 216472 -0. 25345 PCP1      |
| 0. 02947077  | 0. 301448204 | 0. 803025975 0. 147335 -0. 09881 -0. 09767 PDX1      |
| 0. 02947077  | 0. 58766051  | 0. 98500242 -1. 03275 0. 397019 -0. 25936 None       |
| 0. 029508502 | 0. 593217132 | 1 -0. 20135 -0. 07866 -0. 00902 MRH4                 |
| 0. 029601088 | 0. 059378831 | 0. 047172169 -0. 17647 0. 190962 0. 445649 RPS13     |
| 0. 029673188 | 0. 614870993 | 0. 316895602 0. 131825 -0. 04932 0. 207712 YHR020W   |
| 0. 029829564 | 0. 727504645 | 0. 358747602 0. 42917 0. 121264 -0. 63822 SPO20      |
| 0. 029844908 | 0. 022302219 | 0. 037021588 -0. 175 0. 224195 0. 462705 SBH2        |
| 0. 029861042 | 0. 56995474  | 0. 001905297 1. 228654 0. 50431 4. 861566 YOR268C    |
| 0. 029915416 | 0. 637757348 | 0. 384604173 0. 213893 0. 07597 -0. 30669 GYP1       |
| 0. 029929041 | 0. 954188947 | 0. 702041373 -0. 20022 -0. 01712 -0. 17543 YOS9      |
| 0. 030001544 | 0. 047847499 | 0. 733389979 0. 822614 0. 935515 -0. 66896 YGL007C-I |

|              |              |              |             |           |           |                   |
|--------------|--------------|--------------|-------------|-----------|-----------|-------------------|
| 0. 030072327 | 0. 987488335 | 0. 781875866 | -0. 18689   | 0. 010121 | 0. 132104 | EMP65             |
| 0. 030085581 | 0. 629304116 | 0. 953041258 | 2. 070361   | 0. 704302 | 0. 866817 | YCR050C           |
| 0. 030185655 | 0. 98474138  |              | 1 -0. 14113 | 0. 008234 | 0. 010664 | HMO1              |
| 0. 030215904 | 0. 122042485 | 0. 661976013 | 0. 233486   | -0. 21732 | 0. 224232 | MYO4              |
| 0. 030259102 | 0. 971037758 | 0. 343265986 | 0. 190249   | -0. 01364 | -0. 28799 | APL3              |
| 0. 030281411 | 0. 38101428  | 0. 609183674 | 0. 185941   | -0. 10962 | 0. 195183 | GPI8              |
| 0. 030298659 | 0. 318264058 |              | 1 -0. 25736 | 0. 167268 | -0. 00229 | CTO1              |
| 0. 030302955 | 0. 678241823 | 0. 917145138 | -0. 38764   | 0. 123266 | 0. 162955 | COA4              |
| 0. 030398044 | 0. 880612135 |              | 1 0. 262595 | -0. 04094 | 0. 036156 | NUM1              |
| 0. 030475182 | 0. 284831522 | 0. 825508264 | 0. 343185   | -0. 23989 | -0. 21534 | SRB8              |
| 0. 030635284 | 0. 061867898 |              | 1 0. 262699 | -0. 28695 | 0. 009368 | AVO1              |
| 0. 03068606  | 0. 653029567 | 0. 821197283 | -0. 20541   | -0. 07034 | -0. 13047 | CUE2              |
| 0. 030899887 | 0. 903919288 | 0. 957379336 | -0. 26595   | -0. 03516 | 0. 087064 | QDR2              |
| 0. 030949991 | 0. 319484149 | 0. 87592683  | -2. 35178   | -1. 44037 | -0. 44584 | FYV5              |
| 0. 030949991 | 0. 948375626 | 0. 888371569 | -0. 16293   | 0. 01494  | -0. 08043 | VPS75             |
| 0. 03101692  | 0. 723141015 | 0. 523868802 | -0. 16497   | 0. 04707  | 0. 19799  | EMC10             |
| 0. 03101692  | 0. 118958546 | 0. 712529354 | -0. 14262   | 0. 133563 | 0. 121966 | NPC2              |
| 0. 031030393 | 0. 596380201 |              | 1 0. 190655 | -0. 07506 | -0. 02856 | CLB5              |
| 0. 031077046 | 0. 885372644 | 0. 714823939 | -0. 17639   | -0. 02655 | -0. 14993 | TFC1              |
| 0. 031097951 | 0. 170739874 | 0. 883095126 | 0. 28587    | -0. 24188 | 0. 144722 | COG6              |
| 0. 031248702 | 0. 156939743 | 0. 794898864 | 0. 229889   | -0. 2001  | -0. 15828 | RSE1              |
| 0. 031541774 | 0. 167232142 |              | 1 0. 331168 | -0. 28301 | -0. 05908 | SPC97             |
| 0. 031699734 | 0. 940649911 | 0. 69828171  | -0. 17635   | -0. 01737 | -0. 15802 | PTC4              |
| 0. 031726572 | 0. 858991565 | 0. 822329423 | -0. 54391   | -0. 09341 | -0. 34574 | PAU7              |
| 0. 031791679 | 0. 945012036 | 0. 758181494 | 0. 297893   | -0. 02845 | -0. 22608 | RSF1              |
| 0. 031820143 | 0. 167183262 |              | 1 0. 269857 | -0. 2306  | -0. 00764 | PKC1              |
| 0. 031830862 | 0. 003849025 | 0. 967394603 | -0. 59133   | 0. 915028 | -0. 18421 | SPS22             |
| 0. 031910428 | 0. 622976577 | 0. 000827407 | -0. 1545    | 0. 057139 | 0. 585256 | SNU13             |
| 0. 032143319 | 0. 562772918 | 0. 69828171  | -0. 18383   | 0. 077463 | -0. 16499 | CAN1              |
| 0. 032400137 | 0. 120736136 | 0. 463829525 | 0. 227377   | -0. 21519 | 0. 30074  | ESC2              |
| 0. 032843591 | 0. 064354475 | 0. 406058995 | -0. 33616   | 0. 362885 | -0. 47267 | ATG40             |
| 0. 032843591 | 0. 283952102 | 0. 904680493 | -0. 12994   | -0. 09141 | 0. 059591 | TOM70             |
| 0. 032904256 | 0. 270560696 | 0. 278641706 | -1. 80402   | -1. 25753 | 3. 54103  | YBR072C- <i>l</i> |
| 0. 032904256 | 0. 351200486 | 0. 603045192 | 0. 249532   | 0. 15658  | -0. 26657 | PCL8              |
| 0. 032951283 | 0. 736287769 |              | 1 0. 88114  | -0. 24756 | 0. 023223 | YOR186W           |
| 0. 032973723 | 0. 666883176 | 0. 490932171 | -0. 13969   | 0. 046602 | 0. 177165 | GAR1              |
| 0. 033005584 | 0. 120790719 | 0. 014001126 | -0. 17199   | 0. 161703 | 0. 525366 | RPS30A            |
| 0. 033084062 | 0. 752831669 | 0. 879698394 | -2. 00725   | -0. 4833  | 1. 191967 | None              |
| 0. 033182914 | 0. 774791949 | 0. 959222058 | 0. 352913   | 0. 085448 | -0. 11616 | RRI1              |
| 0. 033256765 | 0. 109495914 | 0. 967394603 | 0. 231309   | -0. 22562 | -0. 07159 | EX084             |
| 0. 033340454 | 0. 10961715  |              | 1 -2. 88261 | -2. 83991 | 3. 552773 | None              |
| 0. 033344185 | 0. 176571598 | 0. 286613943 | -0. 67685   | 0. 559335 | -1. 11907 | YOR343C           |
| 0. 033344233 | 0. 805302069 | 0. 579562352 | 0. 328877   | 0. 071671 | -0. 36598 | NBP1              |
| 0. 033480239 | 0. 383767265 |              | 1 -2. 82346 | 1. 498184 | -1. 72186 | None              |
| 0. 033480492 | 0. 689168252 | 0. 070387453 | -0. 39542   | 0. 124511 | -0. 93715 | GAL10             |
| 0. 033589747 | 0. 175236952 | 0. 202387133 | -0. 86563   | 0. 708184 | 1. 696687 | None              |
| 0. 033965543 | 0. 014121187 | 0. 058656331 | -0. 16089   | -0. 22465 | 0. 398861 | UTP14             |
| 0. 034044688 | 0. 96919526  | 0. 967394603 | -0. 18676   | -0. 01395 | -0. 05784 | DIE2              |
| 0. 034105521 | 0. 382579933 | 0. 167446707 | -0. 24164   | 0. 143589 | 0. 483677 | YOS1              |
| 0. 034105521 | 0. 860071452 | 0. 785906893 | 0. 448434   | 0. 078585 | 0. 321405 | None              |
| 0. 034105521 | 0. 746430113 | 0. 99763155  | -0. 39829   | -0. 1076  | -0. 08834 | YCR006C           |
| 0. 03415884  | 0. 644005887 |              | 1 -0. 19094 | 0. 067924 | 0. 01672  | NAT5              |
| 0. 03425086  | 0. 342455246 | 0. 860899891 | 0. 943009   | 0. 602894 | 0. 542505 | None              |
| 0. 03429036  | 0. 028520862 | 0. 617215067 | -0. 24593   | -0. 31295 | -0. 25906 | ATG11             |

|             |             |             |          |          |          |           |
|-------------|-------------|-------------|----------|----------|----------|-----------|
| 0.03429036  | 0.786618236 | 0.781154036 | -0.13905 | -0.03239 | -0.10079 | YPR148C   |
| 0.03429036  | 0.270551983 | 0.833104829 | 0.961511 | -0.71438 | -0.61405 | YGL262W   |
| 0.03429036  | 0.017246708 | 0.986500461 | -0.20676 | 0.280541 | -0.05067 | AIM11     |
| 0.03434086  | 1           | 0.326434921 | -0.1814  | 0.002633 | 0.288218 | CDC36     |
| 0.034357378 | 0.033709464 | 0.053817845 | -0.4292  | 0.52244  | -1.08297 | HVG1      |
| 0.034515193 | 0.075412455 | 0.698712509 | 0.242519 | -0.26023 | -0.22073 | KEL1      |
| 0.034575279 | 0.734744884 | 0.793556588 | 0.234314 | -0.06622 | -0.1645  | DUF1      |
| 0.03468023  | 0.498387456 | 0.939620174 | -0.29562 | 0.141537 | 0.108057 | YLR361C-/ |
| 0.034762284 | 0.505136536 | 0.10494638  | -0.17303 | 0.08198  | -0.38476 | EKI1      |
| 0.034816062 | 0.100684361 | 0.937363635 | 0.123913 | -0.12388 | 0.046027 | OST1      |
| 0.034889069 | 0.930422285 | 0.665743457 | -0.23622 | 0.026156 | -0.22962 | PML39     |
| 0.035074625 | 0.059385215 | 0.559860815 | -0.19688 | -0.22044 | 0.228703 | TRL1      |
| 0.035152337 | 0.08749735  | 0.523868802 | 0.20577  | -0.21424 | -0.25283 | SHE1      |
| 0.035216869 | 0.344098597 | 0.817868751 | 0.181506 | -0.11698 | 0.119846 | ORC5      |
| 0.035393825 | 0.479241576 | 0.993463468 | -0.15872 | 0.079524 | 0.036894 | ARF2      |
| 0.035439004 | 0.057915483 | 0.971609311 | 0.268508 | -0.30506 | -0.08007 | HAL9      |
| 0.035526202 | 0.905759808 | 1           | 0.18461  | -0.02466 | -0.0027  | TRM13     |
| 0.0355747   | 0.119872507 | 0.379660556 | 0.255275 | 0.245048 | -0.37923 | INP1      |
| 0.035587589 | 0.939749928 | 1           | 0.194209 | 0.019844 | 0.017023 | PRP5      |
| 0.035608125 | 0.977201635 | 0.780254446 | -0.163   | -0.01106 | 0.119723 | GCD14     |
| 0.035613577 | 0.048237469 | 0.968819743 | 0.242885 | -0.28644 | -0.07486 | MMS1      |
| 0.035629118 | 0.038719477 | 0.87592683  | 0.223545 | -0.27379 | 0.118785 | BNI4      |
| 0.035687445 | 0.533524502 | 0.889559014 | -0.18318 | 0.082619 | -0.0921  | MDY2      |
| 0.035704344 | 0.919676161 | 0.127873691 | 0.185939 | -0.02262 | -0.39922 | RUP1      |
| 0.035863562 | 0.12748662  | 0.822329423 | -1.99535 | -1.89513 | -0.83317 | None      |
| 0.036225078 | 0.693075842 | 0.937363635 | -0.26158 | -0.08285 | -0.0979  | YDR132C   |
| 0.036225078 | 0.900344125 | 1           | -0.13367 | -0.01854 | 0.007309 | PRS5      |
| 0.036368227 | 0.738154396 | 0.995979951 | 0.20751  | -0.05849 | 0.047614 | ERJ5      |
| 0.036411113 | 0.686382379 | 0.068005273 | 0.210004 | 0.068166 | 0.513874 | TAH1      |
| 0.036468684 | 0.050924397 | 1           | 0.159168 | -0.18595 | -0.01233 | GCN20     |
| 0.036642779 | 0.000620029 | 0.624660139 | 0.120745 | -0.22344 | -0.12723 | ILV3      |
| 0.036672941 | 0.92384638  | 0.904680493 | -0.24291 | -0.02862 | 0.113702 | EGH1      |
| 0.036677165 | 0.293118671 | 0.354530822 | 0.174134 | -0.12342 | -0.26925 | TIR3      |
| 0.036679511 | 0.026368793 | 0.538130573 | 0.215    | -0.28173 | 0.260578 | YLR419W   |
| 0.036693566 | 0.692447241 | 0.781154036 | 0.162423 | 0.051813 | -0.11961 | NFS1      |
| 0.037080361 | 0.045679861 | 0.98500242  | 0.164487 | -0.19681 | 0.04204  | ISW1      |
| 0.03712969  | 0.628366284 | 1           | 0.215399 | 0.081357 | -0.00891 | FUN19     |
| 0.03735232  | 0.995958449 | 0.488400105 | 0.383582 | -0.01806 | -0.49968 | PIG1      |
| 0.037416129 | 0.897429809 | 1           | 0.171878 | -0.02457 | 0.014955 | PEX29     |
| 0.037542512 | 0.295649423 | 1           | 0.205436 | -0.14545 | 0.012904 | BIK1      |
| 0.037628066 | 0.562822273 | 0.085672111 | -0.12955 | 0.056174 | 0.304191 | GIS2      |
| 0.037822899 | 0.661068682 | 0.259414235 | -0.14949 | -0.05213 | 0.26583  | MSS116    |
| 0.03790395  | 0.971257987 | 0.075701779 | -0.56346 | -0.04141 | 1.367496 | None      |
| 0.038074303 | 0.167118139 | 0.910058751 | 0.145599 | 0.127837 | -0.06659 | PDB1      |
| 0.038108024 | 0.385773851 | 0.550781538 | -0.35301 | 0.211657 | 0.420143 | SOM1      |
| 0.038250666 | 0.02140102  | 0.99135025  | -0.20997 | -0.28445 | -0.05065 | KIP2      |
| 0.038600882 | 0.653413831 | 1           | 0.255371 | -0.09141 | 0.033207 | CIK1      |
| 0.038613276 | 0.215332477 | 0.053017966 | 0.162548 | 0.131243 | 0.422843 | RPS22A    |
| 0.038619625 | 0.592871104 | 1           | -0.67239 | -0.2733  | 0.017914 | None      |
| 0.038728208 | 0.782318684 | 0.297637142 | 0.232316 | 0.056142 | 0.391824 | PEX17     |
| 0.038784952 | 0.065404264 | 0.536945233 | -0.2055  | -0.23004 | 0.251149 | SVL3      |
| 0.038786966 | 0.043837937 | 0.888091236 | 0.614346 | 0.742096 | 0.320045 | YGL015C   |
| 0.038791313 | 0.768238502 | 0.319274731 | -1.40921 | -0.33945 | 2.465345 | None      |
| 0.038791313 | 0.484270861 | 0.346217123 | -0.26065 | 0.131094 | -0.41061 | YJR011C   |

|              |              |              |             |           |           |                     |
|--------------|--------------|--------------|-------------|-----------|-----------|---------------------|
| 0. 038800137 | 0. 398444163 | 0. 293969078 | 0. 189264   | -0. 11211 | -0. 31938 | FCY2                |
| 0. 038931935 | 0. 317033104 |              | 1           | -0. 29175 | 0. 198476 | 0. 024934 CDD1      |
| 0. 038973395 | 0. 970974534 | 0. 099020366 | -0. 43378   | -0. 03222 | -1. 01594 | FHN1                |
| 0. 038977274 | 0. 488031192 | 0. 040274266 | -0. 14685   | -0. 07364 | 0. 402862 | MAK11               |
| 0. 039024751 | 0. 005319949 | 0. 992021238 | 0. 288383   | -0. 4636  | -0. 06985 | SPH1                |
| 0. 039037679 | 0. 751354579 | 0. 946806644 | 0. 243011   | -0. 06695 | -0. 08809 | RAD18               |
| 0. 039074361 | 0. 663939309 | 0. 670294084 | -0. 18776   | 0. 065109 | -0. 18422 | GPI14               |
| 0. 039200071 | 0. 794120955 | 0. 929303164 | -0. 24544   | -0. 05716 | -0. 09923 | YOL107W             |
| 0. 039261251 | 0. 374953133 | 0. 069729831 | 0. 185788   | -0. 11608 | -0. 45686 | NRK1                |
| 0. 039276518 | 0. 68602246  | 0. 911367439 | -0. 85496   | -0. 27731 | 0. 402394 | YGL006W-/-          |
| 0. 039369704 | 0. 058914883 | 0. 921286576 | 0. 265043   | 0. 303678 | -0. 11269 | YDL199C             |
| 0. 03941765  | 0. 135418484 | 0. 897313673 | 0. 273437   | -0. 26038 | 0. 136154 | None                |
| 0. 039498016 | 0. 663621022 | 0. 993440716 | -0. 3175    | 0. 110344 | 0. 075477 | YHC3                |
| 0. 039505126 | 0. 795674553 | 0. 904680493 | -0. 19283   | 0. 044493 | -0. 09127 | NMD4                |
| 0. 039514073 | 0. 909690256 | 0. 531865712 | -0. 19256   | 0. 025525 | 0. 238185 | RAI1                |
| 0. 039626593 | 0. 03445693  |              | 1           | 1. 485163 | 1. 902681 | -0. 16556 None      |
| 0. 039682049 | 0. 826578265 | 0. 204412156 | -0. 45525   | 0. 093706 | -0. 89744 | YPR053C             |
| 0. 039706981 | 0. 382001694 | 0. 326601143 | 0. 207512   | -0. 12847 | -0. 33933 | MPS2                |
| 0. 039759618 | 0. 455871763 |              | 1           | 0. 120602 | 0. 064672 | 0. 021365 SRV2      |
| 0. 039939117 | 0. 585786203 |              | 1           | -2. 78054 | -1. 09121 | 1. 246906 None      |
| 0. 039948198 | 0. 033939999 | 0. 605911675 | -0. 4279    | 0. 534967 | 0. 471146 | BRP1                |
| 0. 039985097 | 0. 995096172 | 0. 250804898 | -0. 20929   | -0. 01024 | -0. 38174 | MPA43               |
| 0. 039991546 | 0. 885372644 | 0. 931005601 | -0. 17034   | 0. 026697 | 0. 067717 | SPT15               |
| 0. 039991546 | 0. 183508019 |              | 1           | 2. 664012 | -2. 40762 | -3. 4911 None       |
| 0. 039991546 | 0. 183508019 |              | 1           | 2. 664036 | -2. 40765 | -3. 4911 YLL006W-/- |
| 0. 040020734 | 0. 472952463 |              | 1           | -0. 12804 | 0. 066432 | 0. 021502 RRP7      |
| 0. 040328877 | 8. 30217E-05 | 0. 580281763 | -0. 20695   | 0. 428708 | -0. 23713 | YIL055C             |
| 0. 040822298 | 0. 099966513 |              | 1           | 2. 734613 | 2. 786982 | 3. 710858 None      |
| 0. 041082982 | 0. 861967024 |              | 1           | -0. 17043 | 0. 030336 | -0. 00285 YPQ2      |
| 0. 041101858 | 0. 554264996 | 0. 971609311 | -0. 11723   | -0. 05251 | -0. 03548 | SSO2                |
| 0. 041309418 | 0. 059385215 | 0. 492151956 | -0. 16997   | -0. 19599 | 0. 224106 | PHO90               |
| 0. 041309418 | 0. 076101547 | 0. 745371404 | 0. 194784   | 0. 214419 | 0. 159722 | SUS1                |
| 0. 041309418 | 0. 752831669 |              | 0. 76101686 | -0. 1743  | 0. 047971 | 0. 137885 USE1      |
| 0. 041309418 | 0. 904357451 | 0. 937984736 | -0. 18067   | -0. 02506 | -0. 06867 | TPN1                |
| 0. 041372988 | 0. 488044682 | 0. 929303164 | 0. 177248   | -0. 09015 | -0. 07239 | YGL114W             |
| 0. 041643305 | 0. 102478613 | 0. 006151703 | -0. 22696   | 0. 231578 | 0. 781594 | MHF1                |
| 0. 041734789 | 0. 486588283 | 0. 976378097 | -1. 01126   | -0. 5077  | -0. 30309 | PAU9                |
| 0. 041735321 | 0. 717157234 | 0. 962684605 | -0. 14805   | -0. 04529 | -0. 04909 | PUS9                |
| 0. 041735321 | 0. 188337033 |              | 1           | 2. 655084 | -2. 39755 | -3. 48602 None      |
| 0. 041735321 | 0. 619870553 |              | 1           | -0. 16738 | -0. 06558 | 0. 031082 HUT1      |
| 0. 041751701 | 0. 88355725  | 0. 648534119 | -0. 27786   | 0. 044843 | 0. 288546 | JJJ3                |
| 0. 041756162 | 0. 679403914 | 0. 852767171 | 0. 252      | -0. 08549 | 0. 152563 | FAR11               |
| 0. 041810893 | 0. 235614716 | 0. 199681756 | 0. 153772   | 0. 12208  | 0. 305618 | NTF2                |
| 0. 041915679 | 0. 766157173 | 0. 768691181 | -0. 23558   | 0. 06119  | -0. 18323 | CCE1                |
| 0. 042053089 | 0. 302532438 |              | 0. 39760733 | -0. 12469 | -0. 08854 | 0. 187225 KRE2      |
| 0. 042297196 | 0. 452963704 | 0. 714788215 | -0. 1808    | -0. 09852 | -0. 16246 | INP51               |
| 0. 042377824 | 0. 062448847 | 0. 666296417 | -0. 28144   | -0. 32345 | -0. 28472 | SPC24               |
| 0. 042611843 | 0. 059305878 |              | 1           | -2. 71614 | 2. 994852 | -3. 91196 None      |
| 0. 04262536  | 0. 051155386 | 0. 339657587 | 0. 141507   | -0. 16988 | 0. 229951 | MES1                |
| 0. 042671771 | 0. 483079932 | 0. 041756428 | 0. 18442    | 0. 095265 | -0. 50783 | CEM1                |
| 0. 042671771 | 0. 460298273 | 0. 224875404 | -0. 2923    | 0. 156852 | 0. 558275 | YCL012C             |
| 0. 042671771 | 0. 414293185 | 0. 711541955 | 0. 122912   | -0. 072   | 0. 112095 | KES1                |
| 0. 042671771 | 0. 985620143 | 0. 748790103 | 0. 175284   | -0. 01068 | -0. 14336 | FMP32               |
| 0. 042750416 | 0. 829740566 |              | 1           | -0. 17401 | 0. 036207 | 0. 012021 NSE1      |

|             |             |             |          |          |          |                  |
|-------------|-------------|-------------|----------|----------|----------|------------------|
| 0.04284629  | 0.03264687  | 0.00166885  | -0.17018 | 0.219269 | 0.650317 | RPL37B           |
| 0.04284629  | 0.501367304 | 0.971609311 | -0.16022 | 0.079458 | 0.048918 | DET1             |
| 0.04284629  | 0.740750315 | 0.971609311 | -1.05895 | -0.29537 | 0.351475 | None             |
| 0.043039681 | 0.530999534 | 0.223381301 | 0.292361 | 0.137901 | -0.55955 | YDL057W          |
| 0.043114968 | 0.27087925  | 0.276169893 | -0.14185 | 0.106864 | 0.25269  | PFY1             |
| 0.043114968 | 0.278286675 | 0.611223762 | -0.21734 | -0.16236 | 0.242146 | YNR065C          |
| 0.043114968 | 0.261182253 | 0.942108564 | 0.130652 | -0.10075 | -0.04918 | HRB1             |
| 0.04337704  | 0.231604832 | 0.074036394 | 0.11295  | -0.09109 | 0.281154 | CCT2             |
| 0.043434073 | 0.00502594  | 0.410354533 | 0.158119 | -0.25929 | 0.235544 | NEW1             |
| 0.043434073 | 0.032210521 |             | 1        | -0.24488 | 0.316562 | 0.041228 LIP2    |
| 0.043463482 | 0.731503094 | 0.379660556 | 0.420387 | 0.125099 | -0.64855 | HOP1             |
| 0.043509793 | 0.955739843 | 0.7990478   | -0.12542 | -0.01127 | -0.09006 | ABP1             |
| 0.043607694 | 0.017246708 | 2.0367E-05  | -0.19638 | 0.279038 | 0.940892 | RPL41A           |
| 0.043654829 | 0.721964399 | 0.726816534 | 0.192382 | -0.05893 | -0.16812 | DML1             |
| 0.043726661 | 0.808656261 | 0.23756346  | -0.55451 | 0.123862 | -1.05719 | SPS2             |
| 0.043838946 | 0.977693292 | 0.838974643 | -0.14379 | -0.01    | 0.092224 | YER156C          |
| 0.043865488 | 0.586204562 | 0.967394603 | 0.293039 | -0.12602 | -0.09585 | YJL132W          |
| 0.04440229  | 0.024098511 | 0.320515456 | -0.28027 | 0.380527 | -0.4667  | MEP1             |
| 0.044540233 | 0.562638241 | 0.033854211 | 0.161781 | -0.0729  | -0.46427 | GID7             |
| 0.044540233 | 0.752538044 | 0.746737164 | 0.143974 | 0.040422 | 0.119383 | ERV29            |
| 0.04467589  | 0.858991565 | 0.870558299 | -0.19748 | -0.03636 | 0.112285 | SPC19            |
| 0.044694866 | 0.92361733  | 0.790203342 | 0.254202 | 0.031364 | -0.18879 | RAD4             |
| 0.044858825 | 0.438384456 | 0.857180248 | 0.63378  | -0.3662  | -0.38978 | YLR122C          |
| 0.045197155 | 0.166916703 |             | 1        | -0.84966 | 0.752913 | -0.19464 YJL027C |
| 0.045426088 | 0.397361658 |             | 1        | 0.160428 | 0.098313 | 0.005533 LOT5    |
| 0.04563209  | 0.288190795 | 0.27982387  | -0.14687 | 0.108872 | 0.262794 | KEI1             |
| 0.04563209  | 0.110870889 | 0.976568193 | -0.19332 | 0.197482 | 0.05666  | MRPS28           |
| 0.04609593  | 0.960977992 | 0.442779343 | 1.264279 | 0.109872 | -1.87645 | LDS1             |
| 0.046453071 | 0.720851511 | 0.904680493 | -1.32659 | -0.40015 | 0.685759 | None             |
| 0.046597557 | 0.121882831 | 0.678279671 | 0.500785 | 0.503015 | -0.49971 | None             |
| 0.046809242 | 0.29598782  | 0.733389979 | -0.15866 | -0.11637 | -0.13783 | DNF1             |
| 0.046947616 | 0.436667707 |             | 1        | -0.19326 | -0.1108  | -0.03645 MSN2    |
| 0.046951095 | 0.058385914 |             | 1        | -0.1518  | -0.18035 | 0.02494 RSC58    |
| 0.047096385 | 0.926698469 | 0.971609311 | -0.18335 | -0.02216 | -0.05765 | SCY1             |
| 0.047115121 | 0.321781322 | 0.085125736 | -0.13599 | 0.095469 | 0.333597 | RPL2A            |
| 0.047132549 | 0.786999262 | 0.201505014 | -0.4489  | -0.11059 | 0.910505 | None             |
| 0.047620036 | 0.516999501 | 0.816993642 | 0.123046 | 0.060617 | 0.086039 | PRS1             |
| 0.047702291 | 0.133103516 | 0.919516515 | 0.228991 | 0.225245 | -0.10369 | TDA5             |
| 0.04814447  | 0.98348805  |             | 1        | 0.385991 | -0.02531 | 0.037723 PRP18   |
| 0.04846279  | 0.049421861 | 0.420929331 | -0.20675 | 0.253948 | -0.30691 | YMR253C          |
| 0.048789287 | 0.056847963 | 0.372619727 | -0.16157 | -0.19427 | 0.258408 | BOI2             |
| 0.048832414 | 0.633674911 | 0.489219563 | 0.218556 | 0.085494 | -0.29838 | GTS1             |
| 0.048833078 | 0.103875873 | 0.029665642 | -0.18297 | 0.191957 | 0.54531  | RPP1B            |
| 0.048933426 | 0.177075653 | 0.836674365 | -0.155   | -0.14016 | -0.1024  | MYO5             |
| 0.049317964 | 8.13719E-05 | 0.617215067 | -0.19176 | -0.4181  | -0.21664 | ALR2             |
| 0.049317964 | 0.589760072 |             | 1        | 2.615148 | 1.110465 | 1.342953 None    |
| 0.049535158 | 0.485953152 | 0.522217116 | 0.123808 | 0.065432 | -0.16247 | ALT1             |
| 0.049598644 | 0.986467664 | 0.241395092 | 0.259208 | -0.01598 | -0.49806 | NSE4             |
| 0.049630789 | 0.591976174 |             | 1        | 2.607772 | 1.102631 | 1.332943 None    |
| 0.049653522 | 0.867220499 | 0.739113671 | 0.178196 | -0.03231 | -0.15405 | PSD2             |
| 0.04973174  | 0.433255564 |             | 1        | 0.276093 | -0.16203 | 0.054808 None    |
| 0.049744399 | 0.701086826 | 0.888371569 | -0.15278 | -0.05052 | -0.08262 | SPT3             |
| 0.050030931 | 0.248699128 | 0.026784925 | -0.14668 | 0.117777 | 0.446395 | RPS16B           |
| 0.050150864 | 0.146520392 | 0.781154036 | 0.242314 | -0.2356  | 0.190083 | RTC4             |



|             |             |             |          |          |          |                 |
|-------------|-------------|-------------|----------|----------|----------|-----------------|
| 0.05032769  | 0.484345804 | 0.814159342 | -0.33532 | 0.176954 | -0.23737 | YKL162C         |
| 0.05032769  | 0.759288226 | 0.87592683  | 1.537025 | 0.426557 | -0.86415 | None            |
| 0.0503378   | 0.051155386 | 0.743134392 | -0.15931 | 0.19601  | -0.13628 | NDI1            |
| 0.0503378   | 0.560135699 | 0.764962215 | -0.25018 | 0.114958 | -0.20282 | LCL3            |
| 0.050475627 | 0.140664834 | 0.986912078 | 0.152265 | 0.148969 | 0.040143 | MAS1            |
| 0.050586575 | 0.002722567 |             | 1        | 0.194612 | -0.34731 | -0.04049 SPC105 |
| 0.050586575 | 0.148485947 |             | 1        | -0.17025 | -0.16407 | 0.002985 ORC1   |
| 0.050700427 | 0.563839533 | 0.484106841 | -0.23313 | -0.10696 | -0.32359 | YAT2            |
| 0.05086553  | 0.196724669 | 0.983370642 | -0.14017 | 0.123018 | 0.039067 | CAM1            |
| 0.051093221 | 0.051738183 | 0.681411478 | 0.179489 | -0.22256 | 0.18225  | UBP3            |
| 0.051382092 | 0.045478422 |             | 1        | 0.246468 | -0.31461 | -0.0462 NET1    |
| 0.051812909 | 0.826578265 | 0.53398283  | 0.131848 | 0.028946 | 0.171599 | ADK1            |
| 0.051833833 | 0.396430227 | 0.916204152 | 0.200016 | -0.12626 | 0.09424  | YPR089W         |
| 0.051868698 | 0.039547582 | 0.033854211 | -0.16517 | 0.213992 | 0.489355 | RPP2B           |
| 0.05199992  | 8.89882E-15 | 0.27982387  | 0.120006 | 0.464616 | -0.21985 | TPS1            |
| 0.05199992  | 0.846530385 | 0.840202254 | -0.32235 | 0.064172 | -0.21201 | RPL33A          |
| 0.052163548 | 0.111257458 | 0.921286576 | 0.257867 | -0.27306 | -0.1165  | RAD5            |
| 0.05216609  | 0.857366864 | 0.007095665 | 0.107737 | -0.02066 | 0.384428 | NOP7            |
| 0.052292414 | 0.613747706 | 0.704128889 | 0.222605 | -0.09305 | 0.215853 | YBP1            |
| 0.052611574 | 0.07256669  | 0.726816534 | -0.17961 | -0.20915 | -0.16223 | SAN1            |
| 0.05283662  | 0.338327134 | 0.781709456 | -0.18213 | 0.127137 | -0.14289 | VPS73           |
| 0.05283816  | 0.003897191 |             | 1        | 0.15749  | -0.27509 | -0.00165 AGE1   |
| 0.052871712 | 0.893928423 | 0.7990478   | -0.12713 | 0.019804 | -0.09504 | SSO1            |
| 0.05290877  | 0.557678834 |             | 1        | 0.213472 | -0.10055 | 0.003628 AIM10  |
| 0.053102837 | 0.057235409 |             | 1        | 0.323649 | 0.395001 | -0.01957 PAD1   |
| 0.053578637 | 0.096123699 | 0.783364287 | 0.187667 | -0.20663 | 0.147744 | CHD1            |
| 0.053700553 | 1           | 0.870558299 | -0.12148 | 0.00149  | 0.071636 | FSF1            |
| 0.053941763 | 0.094415043 | 0.835951015 | 0.279689 | -0.31067 | -0.18927 | ULS1            |
| 0.053984214 | 0.551240588 |             | 1        | -0.20365 | 0.096424 | 0.026001 ECM7   |
| 0.054146543 | 0.008136572 | 0.831370236 | -0.14193 | 0.230169 | 0.097318 | RSM10           |
| 0.05425838  | 0.38597363  | 0.721271027 | 0.135203 | 0.087417 | 0.125624 | MLC1            |
| 0.05432166  | 0.598532156 | 0.685581609 | -0.14546 | 0.062847 | 0.148228 | ALG9            |
| 0.054698621 | 0.549922765 | 0.563376575 | -0.21182 | 0.100802 | 0.265562 | SMD3            |
| 0.054725087 | 0.05078776  | 0.082586739 | -0.16263 | 0.203911 | -0.41094 | MDL2            |
| 0.054725948 | 0.645802547 |             | 1        | -0.14984 | 0.058134 | 0.025542 GPN3   |
| 0.054736225 | 0.943232175 | 0.961108582 | 0.213169 | -0.02285 | -0.07601 | STE7            |
| 0.055027701 | 0.963282012 | 0.000164967 | -0.73673 | -0.06293 | -4.06507 | YNL033W         |
| 0.055082041 | 0.295659    | 0.926370396 | 0.255233 | -0.19449 | 0.113896 | RGR1            |
| 0.055090499 | 0.885106299 | 0.735465999 | 0.177391 | 0.030009 | -0.1588  | NTA1            |
| 0.055099656 | 0.019167121 | 0.029665642 | -0.23694 | 0.347301 | 0.722534 | GPG1            |
| 0.055099656 | 0.880612135 | 0.92745323  | 1.745197 | 0.2944   | -0.74488 | None            |
| 0.055406862 | 0.000305053 |             | 1        | -0.13493 | 0.278974 | 0.005065 VTC1   |
| 0.055463617 | 0.246344291 | 0.751551414 | 0.127991 | -0.10597 | 0.109678 | HPM1            |
| 0.055498883 | 0.568378999 | 0.328463464 | -0.12046 | -0.05567 | 0.208618 | TMA46           |
| 0.05554135  | 0.964966003 | 0.897942454 | -0.20362 | -0.01757 | 0.107439 | YHR182W         |
| 0.055567182 | 0.223686385 | 0.969393262 | -0.25931 | 0.220741 | -0.0862  | PET130          |
| 0.055567182 | 0.137396123 | 0.979701935 | 0.196597 | -0.19865 | -0.05786 | POL1            |
| 0.055805179 | 0.455741185 | 0.955111107 | 0.130008 | 0.074538 | -0.04804 | ARC15           |
| 0.055820886 | 0.597190291 | 0.730786259 | -0.18246 | 0.079562 | -0.16559 | VPS33           |
| 0.0559644   | 0.368966584 | 0.238709821 | -0.15338 | -0.10313 | -0.30295 | ENT2            |
| 0.056212382 | 0.084904846 | 0.69331605  | 0.201475 | -0.2309  | -0.20366 | TRS120          |
| 0.056212382 | 0.782318684 | 0.93622018  | -0.25698 | -0.06648 | -0.1057  | YMR187C         |
| 0.056224523 | 0.619431177 | 0.341937853 | -0.18135 | 0.075395 | -0.30865 | YKR051W         |
| 0.056224523 | 0.310057499 | 0.50705979  | -0.12711 | -0.09448 | 0.174892 | TRM82           |

|             |             |             |          |          |          |         |
|-------------|-------------|-------------|----------|----------|----------|---------|
| 0.056485468 | 0.913952086 | 0.881648602 | -0.12681 | 0.017544 | -0.07194 | YMR295C |
| 0.05685888  | 0.539290348 | 1           | -2.57821 | 1.161361 | -1.3513  | HMRA2   |
| 0.056966299 | 0.384350339 | 0.92711763  | 0.159021 | 0.104422 | 0.071181 | SEM1    |
| 0.057103534 | 0.485953152 | 0.758065316 | 0.131628 | -0.07174 | 0.1119   | ARP4    |
| 0.057116586 | 0.477410911 | 0.855814602 | 0.164761 | -0.09137 | -0.10473 | SLA1    |
| 0.057234256 | 0.079574256 | 1           | -0.15826 | -0.18416 | 0.020617 | ITC1    |
| 0.057280243 | 0.341849588 | 0.87592683  | -0.13174 | 0.093082 | 0.076418 | YPR063C |
| 0.057302447 | 0.017770743 | 0.86530488  | 0.167663 | 0.251651 | 0.102708 | HST2    |
| 0.057345002 | 1           | 1           | -0.18548 | -0.00358 | 0.042217 | OSH2    |
| 0.057398532 | 0.979904046 | 0.73520044  | -0.21073 | 0.015015 | -0.19018 | DAL82   |
| 0.057463122 | 1           | 0.878688605 | 0.262166 | -0.00962 | -0.15114 | PXA1    |
| 0.057504481 | 0.970365023 | 0.737748659 | -0.26241 | 0.021326 | -0.23448 | TMN2    |
| 0.057777769 | 0.440243906 | 0.286613943 | -2.13516 | -1.19141 | 4.480262 | None    |
| 0.057858599 | 0.500936572 | 0.790203342 | -0.27472 | 0.14447  | -0.21358 | PKP1    |
| 0.058008657 | 0.113318165 | 0.223097491 | -0.14065 | -0.1506  | 0.287542 | DBP10   |
| 0.058345601 | 0.751354579 | 0.319048281 | 0.154215 | -0.04588 | 0.2751   | OSM1    |
| 0.058366075 | 0.843393723 | 0.132432156 | 0.232604 | 0.048343 | -0.54571 | ATG17   |
| 0.058723063 | 0.011369315 | 0.525726142 | 0.182739 | -0.29432 | 0.247791 | TMN3    |
| 0.058729274 | 0.421043664 | 0.731592804 | -0.26133 | 0.160277 | -0.23863 | ATG12   |
| 0.058759217 | 0.637510936 | 0.695014092 | -0.14129 | -0.05695 | -0.14371 | VAC17   |
| 0.058814392 | 0.801161752 | 0.661976013 | -0.21256 | 0.052184 | 0.230708 | YKR045C |
| 0.058879105 | 0.069544572 | 0.161150878 | 0.153999 | 0.184804 | 0.348437 | RPL8B   |
| 0.059030089 | 0.377409904 | 0.859769494 | 0.245805 | -0.16577 | 0.155757 | MTC4    |
| 0.059180316 | 0.360063532 | 0.127733954 | 0.233711 | 0.16194  | -0.55239 | SP073   |
| 0.059182064 | 0.94036767  | 0.058656331 | 0.193885 | 0.021704 | -0.5337  | VPS36   |
| 0.059237888 | 0.928674902 | 0.463829525 | -0.17047 | -0.02127 | -0.25156 | LDB7    |
| 0.059438013 | 0.932813812 | 1           | 0.111668 | -0.01357 | 0.007644 | NAB2    |
| 0.059668717 | 0.576525662 | 0.889649609 | -0.12313 | 0.056814 | 0.068163 | RRP43   |
| 0.059789898 | 0.281582083 | 0.915496392 | 0.224802 | -0.17909 | 0.110136 | VPS72   |
| 0.059800424 | 0.72767405  | 0.185716843 | -0.14609 | 0.046725 | 0.317026 | MRPS17  |
| 0.059803489 | 0.960977992 | 0.39284795  | -0.1065  | -0.00973 | 0.172427 | CDC33   |
| 0.059824695 | 0.350302215 | 0.656171223 | 0.246755 | -0.17489 | -0.27264 | MMS4    |
| 0.059910921 | 1           | 0.530625906 | 0.19227  | 0.007102 | -0.25885 | PGS1    |
| 0.060106412 | 0.244868024 | 0.733954873 | 0.197288 | 0.166224 | -0.18031 | YEN1    |
| 0.060339837 | 0.354402795 | 0.93741782  | 0.151855 | -0.10681 | 0.062725 | SEC16   |
| 0.060463735 | 0.576193096 | 0.670601582 | 1.470722 | 0.665306 | 1.672228 | None    |
| 0.060510711 | 0.36814865  | 0.05005618  | 1.934683 | -1.38553 | -7.48095 | ATP6    |
| 0.060587591 | 0.415254519 | 0.507217503 | -0.17092 | 0.106686 | -0.23775 | SLM4    |
| 0.060657072 | 0.8316826   | 0.868996053 | -0.15176 | -0.03357 | -0.0929  | YPR147C |
| 0.060677511 | 6.75771E-05 | 0.717477893 | 0.159308 | 0.364179 | 0.152742 | GDH2    |
| 0.060677511 | 0.340662441 | 0.721271027 | -0.23049 | 0.164827 | -0.21761 | KAR5    |
| 0.060677511 | 0.621348798 | 1           | 0.12503  | -0.05284 | 0.001219 | CKA2    |
| 0.061061818 | 0.856930611 | 1           | 0.137803 | 0.02737  | 0.023911 | YMC2    |
| 0.061065529 | 0.475062233 | 0.049893598 | -0.12519 | -0.07049 | 0.360594 | FAF1    |
| 0.061261188 | 0.97156603  | 0.817868751 | -0.15162 | 0.012192 | 0.111108 | RER2    |
| 0.061506123 | 0.803249496 | 0.672010939 | -0.14759 | -0.03634 | 0.158378 | SEY1    |
| 0.061538315 | 0.967392794 | 0.324676992 | 0.144646 | 0.012512 | -0.25788 | CDC34   |
| 0.061538315 | 0.954916262 | 1           | -0.18158 | -0.01765 | 0.042717 | VMA22   |
| 0.061726762 | 0.977693292 | 0.745385015 | 0.143294 | -0.01076 | -0.12731 | GTB1    |
| 0.061746371 | 1           | 0.119906082 | -1.29744 | 0.00606  | 3.458795 | YHL005C |
| 0.062224565 | 0.018033455 | 0.255950109 | -0.19672 | 0.298422 | -0.386   | TES1    |
| 0.062584235 | 0.780949762 | 0.801754205 | -0.23211 | 0.062094 | -0.17785 | SMD2    |
| 0.063365129 | 0.995096172 | 0.591339962 | -1.3075  | -0.06657 | -1.84591 | None    |
| 0.063449051 | 0.012231886 | 0.847404354 | -0.14405 | 0.231455 | 0.096261 | AIM41   |

|              |              |              |           |           |           |                   |
|--------------|--------------|--------------|-----------|-----------|-----------|-------------------|
| 0. 063571823 | 0. 610223632 | 0. 372619727 | 0. 1742   | -0. 07662 | -0. 29435 | ARG2              |
| 0. 063844326 | 0. 918983013 | 0. 546331004 | 1. 428915 | -0. 19234 | 2. 031571 | None              |
| 0. 063844326 | 0. 137099942 | 0. 781154036 | -0. 24774 | 0. 25531  | -0. 2022  | ATG5              |
| 0. 064452877 | 0. 030231646 |              | 1         | -0. 84541 | 1. 170739 | -0. 16682 YBR144C |
| 0. 064891108 | 0. 128591907 | 0. 839473292 | 0. 291706 | -0. 3107  | -0. 20273 | MPS3              |
| 0. 064964034 | 0. 436108065 | 0. 924605282 | -0. 25568 | 0. 156275 | -0. 11911 | MUM3              |
| 0. 065167074 | 0. 321967781 | 0. 697639077 | -0. 11468 | -0. 08624 | 0. 118769 | OST3              |
| 0. 065230356 | 0. 073170272 | 0. 062057174 | -0. 16365 | 0. 19813  | 0. 455828 | RPL6A             |
| 0. 06526659  | 0. 748196133 | 0. 971561168 | 0. 125947 | -0. 0387  | 0. 04308  | STE23             |
| 0. 065372999 | 0. 826578265 | 0. 859694751 | -0. 1565  | 0. 035926 | 0. 101166 | PLP2              |
| 0. 065585127 | 0. 890938834 | 0. 471735065 | 0. 188016 | -0. 03144 | -0. 28056 | GYP5              |
| 0. 065681238 | 0. 04685584  | 0. 838617816 | -0. 19412 | -0. 25847 | -0. 13544 | SAS3              |
| 0. 065818812 | 0. 357604972 |              | 1         | -1. 38091 | -0. 96423 | -0. 27834 None    |
| 0. 065826327 | 0. 0969018   | 0. 84918567  | 0. 166711 | -0. 19148 | 0. 111529 | DNF2              |
| 0. 065831294 | 0. 98811108  | 0. 617350547 | 0. 17872  | -0. 01103 | -0. 21414 | CSM1              |
| 0. 065831294 | 0. 149436038 | 0. 953128828 | 0. 197919 | -0. 20217 | -0. 07654 | ARP8              |
| 0. 066049005 | 0. 035103743 | 0. 87592683  | -0. 18266 | 0. 253992 | 0. 109217 | FMP46             |
| 0. 066683909 | 0. 712618958 | 0. 358747602 | -1. 7707  | 0. 546234 | -3. 7938  | None              |
| 0. 066751523 | 0. 295390559 | 0. 212331256 | -0. 10727 | -0. 08504 | 0. 229482 | EBP2              |
| 0. 066859659 | 0. 057147327 | 0. 92578246  | -0. 2083  | 0. 265658 | -0. 09664 | COX16             |
| 0. 067097335 | 0. 147631315 |              | 1         | 0. 184249 | -0. 18977 | 0. 006133 BIR1    |
| 0. 067311076 | 0. 192026738 | 0. 585629945 | 0. 179968 | -0. 17036 | 0. 229224 | LRE1              |
| 0. 067381548 | 0. 98474138  |              | 1         | 0. 239282 | -0. 01642 | 0. 034263 DAS1    |
| 0. 067492409 | 0. 662458676 | 0. 488692236 | -0. 13102 | 0. 051129 | 0. 192196 | GCN1              |
| 0. 067596231 | 0. 442611824 | 0. 185716843 | 1. 062622 | 0. 645736 | -2. 58544 | YIL134C- <i>l</i> |
| 0. 067596231 | 0. 638898558 | 0. 494558503 | 0. 628417 | 0. 260833 | 0. 913067 | None              |
| 0. 067650469 | 0. 213721853 | 0. 975062924 | 0. 146955 | -0. 13375 | -0. 04793 | TOP1              |
| 0. 067742745 | 0. 17643013  |              | 1         | -2. 52806 | -2. 48727 | 3. 179529 None    |
| 0. 067742953 | 0. 355396524 | 0. 768691181 | -0. 22514 | -0. 16158 | -0. 19276 | FZ01              |
| 0. 068201405 | 0. 605317388 | 0. 130669798 | 0. 124301 | 0. 055848 | 0. 303836 | CKB2              |
| 0. 068840693 | 0. 02857849  | 0. 740020932 | -0. 1596  | -0. 23317 | -0. 14747 | AIM44             |
| 0. 068840693 | 0. 786528339 | 0. 888371569 | 0. 128656 | -0. 03456 | 0. 074647 | SEC22             |
| 0. 068966911 | 0. 438949356 | 0. 981177966 | -0. 15684 | 0. 096853 | 0. 04777  | ADE8              |
| 0. 068966911 | 0. 892744236 |              | 1         | 0. 153013 | -0. 02552 | -0. 02094 UPF3    |
| 0. 069535792 | 0. 026063738 |              | 1         | 0. 80851  | 1. 205333 | 0. 153371 GAT4    |
| 0. 069606768 | 0. 119099734 | 0. 498203091 | 0. 1435   | -0. 15837 | 0. 209544 | SEC26             |
| 0. 069941151 | 0. 000779302 | 0. 001486144 | 0. 164451 | 0. 339752 | 0. 704974 | RPL41A            |
| 0. 070064373 | 0. 20100005  | 0. 349201299 | -0. 10904 | -0. 10193 | -0. 19309 | PYC2              |
| 0. 070134774 | 0. 273830786 | 0. 053709945 | 0. 128915 | 0. 107189 | 0. 377952 | RPS11A            |
| 0. 070330667 | 0. 203402724 |              | 1         | -0. 16084 | -0. 14988 | -0. 01925 MSN1    |
| 0. 070463494 | 0. 261134686 | 0. 721271027 | -0. 13552 | -0. 11538 | 0. 132874 | SPB4              |
| 0. 070464402 | 0. 097093353 |              | 1         | -2. 45249 | 2. 720595 | -3. 60496 None    |
| 0. 070753074 | 0. 10422266  |              | 1         | 0. 150963 | -0. 17263 | 0. 013068 ALK2    |
| 0. 070914313 | 0. 019075148 | 0. 889649609 | 0. 19217  | -0. 30163 | -0. 11056 | NDD1              |
| 0. 071599307 | 0. 907221502 | 0. 785906893 | -0. 1151  | 0. 017467 | -0. 09552 | SEH1              |
| 0. 072450666 | 0. 058914883 | 0. 202387133 | 0. 182876 | 0. 237298 | 0. 403973 | PET191            |
| 0. 072450666 | 0. 012274646 | 0. 746636456 | 0. 976333 | -1. 80284 | -1. 14301 | YML100W- <i>l</i> |
| 0. 072450666 | 0. 896286063 |              | 1         | -0. 18816 | 0. 030814 | -0. 00986 FMN1    |
| 0. 072556384 | 0. 265592192 | 0. 46824606  | 0. 237011 | 0. 201813 | -0. 36292 | NTH2              |
| 0. 072688411 | 1            | 0. 621769539 | 0. 230584 | -0. 00465 | -0. 28066 | RAD55             |
| 0. 072703225 | 0. 313232327 | 0. 688473731 | 0. 146531 | -0. 11489 | 0. 158687 | STO1              |
| 0. 07272872  | 1. 81748E-14 |              | 1         | 0. 152206 | 0. 62638  | -0. 00596 HXK1    |
| 0. 072787314 | 1            |              | 1         | -0. 1515  | -0. 00224 | -0. 00301 TYW3    |
| 0. 073167276 | 0. 242501074 |              | 1         | 0. 155548 | 0. 137279 | -0. 00913 XPT1    |

|             |             |             |          |          |          |           |
|-------------|-------------|-------------|----------|----------|----------|-----------|
| 0.073317645 | 0.112837622 | 1           | 0.194262 | -0.22035 | -0.00249 | SIP3      |
| 0.07337207  | 0.596380201 | 0.67702211  | 0.123851 | 0.057606 | 0.137129 | CPR1      |
| 0.073374437 | 0.781328521 | 0.056523979 | 0.135715 | 0.037678 | 0.397244 | ERP1      |
| 0.073856382 | 0.713873054 | 0.8119342   | -0.15451 | -0.05385 | -0.11978 | YLR001C   |
| 0.073875247 | 0.966757446 | 0.583321672 | 0.191754 | -0.01746 | -0.24939 | MIH1      |
| 0.073909206 | 0.183157722 | 0.7225564   | 0.120579 | 0.117849 | 0.118732 | YJL055W   |
| 0.073915461 | 0.492341773 | 0.967394603 | -0.21647 | 0.122269 | 0.077616 | NUF2      |
| 0.074210302 | 0.120527431 | 0.30954724  | -0.10983 | -0.12211 | 0.20879  | HAS1      |
| 0.074210302 | 0.046903645 | 0.635840497 | -1.38373 | -2.03293 | -2.06558 | YRF1-2    |
| 0.07454466  | 0.340662441 | 0.644321253 | 1.813491 | 1.320501 | -1.74882 | None      |
| 0.074643599 | 0.746430113 | 0.976568193 | 0.16837  | -0.05366 | 0.054615 | ASI3      |
| 0.075062241 | 0.20204603  | 0.514203536 | 0.21809  | -0.20818 | -0.31669 | CHL4      |
| 0.075259882 | 0.932146929 | 0.562048326 | -0.22291 | 0.028566 | -0.3004  | PXA2      |
| 0.075259882 | 0.387128577 | 0.971609311 | -1.81069 | 1.150497 | -0.86511 | YER181C   |
| 0.075443152 | 0.857968624 | 0.771481707 | 0.257051 | -0.05345 | -0.22428 | REV3      |
| 0.075515218 | 0.780041137 | 1           | 0.173799 | 0.048859 | -0.03669 | RAD2      |
| 0.075976207 | 0.143789044 | 0.765014016 | 0.226758 | -0.24225 | 0.202232 | DRS2      |
| 0.075976207 | 0.177075653 | 0.919926509 | 0.173734 | -0.17343 | -0.08603 | ASE1      |
| 0.076041809 | 0.839560652 | 1           | -0.16079 | -0.03607 | -0.01796 | HFA1      |
| 0.076485261 | 0.008822013 | 1           | 0.18676  | -0.32804 | -0.00633 | MPT5      |
| 0.076602191 | 0.324783906 | 0.328463464 | 0.195869 | 0.152409 | -0.36323 | ARL3      |
| 0.076993217 | 0.261791204 | 0.904680493 | 0.351304 | -0.30675 | -0.19202 | SNT2      |
| 0.077099586 | 0.767459399 | 0.661089241 | -0.50722 | 0.147299 | 0.585867 | None      |
| 0.077240761 | 0.282370113 | 0.187978416 | 0.305166 | 0.256265 | 0.697137 | YEL067C   |
| 0.077240761 | 0.761207443 | 1           | 0.127201 | -0.03851 | 0.017275 | RFC3      |
| 0.077264488 | 4.13667E-06 | 0.403368253 | -0.13689 | 0.369126 | 0.23164  | SDH4      |
| 0.077356276 | 0.945664113 | 0.261118505 | 0.112421 | -0.01274 | -0.23068 | RNQ1      |
| 0.077385365 | 0.009388611 | 0.622714429 | -0.13169 | 0.228141 | -0.16179 | YCP4      |
| 0.077405767 | 0.731503094 | 0.247373218 | 0.128671 | 0.043078 | 0.270705 | RPS8A     |
| 0.077430316 | 0.00430551  | 1           | -0.13187 | 0.245538 | 0.019978 | RSM25     |
| 0.07762445  | 0.043220269 | 1           | 0.141429 | 0.197807 | -0.02814 | YET1      |
| 0.077754019 | 0.746926462 | 0.023500528 | -1.20629 | 0.368657 | -5.93733 | YNL042W-I |
| 0.077917988 | 0.914594311 | 1           | -0.54717 | 0.080032 | 0.077773 | SPS100    |
| 0.07796152  | 0.039547582 | 0.667844098 | 0.167045 | -0.23899 | 0.1916   | RRP14     |
| 0.078248067 | 0.141633165 | 0.058656331 | -0.14547 | 0.155742 | 0.428087 | RPS23A    |
| 0.078457227 | 0.209645547 | 0.168205333 | -0.19255 | 0.181121 | -0.45499 | YNL011C   |
| 0.078754535 | 0.643719368 | 0.218100263 | -0.20599 | -0.0872  | -0.45084 | LSB6      |
| 0.078872755 | 0.36891213  | 0.261118505 | 0.297327 | 0.216334 | -0.61105 | PCD1      |
| 0.078966682 | 0.124795835 | 0.043101043 | -0.11417 | -0.1275  | 0.357934 | SDA1      |
| 0.078966682 | 0.98408428  | 1           | -0.17142 | -0.01232 | 0.031223 | PRS2      |
| 0.079033452 | 0.205442701 | 0.551606929 | 0.204571 | -0.19628 | -0.28381 | HDA2      |
| 0.079070313 | 0.905759808 | 0.868996053 | 0.162282 | 0.02556  | 0.105444 | YDL012C   |
| 0.079070313 | 0.761075278 | 1           | -0.18669 | 0.056652 | -0.03937 | GMH1      |
| 0.079136496 | 0.461336331 | 0.984628847 | 0.16115  | -0.09919 | 0.049167 | CWC24     |
| 0.079656611 | 0.27087925  | 1           | 2.32573  | -2.08265 | -3.11423 | None      |
| 0.079927327 | 0.019622226 | 0.721271027 | -0.14917 | 0.236899 | 0.150228 | PMP3      |
| 0.080036578 | 0.393729423 | 0.129195117 | 0.118308 | 0.082262 | 0.300975 | RPS5      |
| 0.080060737 | 0.031545749 | 0.927845118 | 0.164337 | -0.24569 | 0.078507 | ESL1      |
| 0.080146277 | 0.597239802 | 0.228471317 | -0.18094 | -0.08568 | -0.39154 | MHT1      |
| 0.080146277 | 0.936093775 | 0.931568877 | 0.164161 | 0.020653 | 0.074905 | YBL010C   |
| 0.080336565 | 0.526984154 | 0.835951015 | -0.17544 | 0.094835 | -0.12942 | COQ11     |
| 0.080364668 | 0.01270424  | 0.05506878  | 0.11754  | -0.19917 | 0.353362 | SAS10     |
| 0.080449837 | 0.730753693 | 0.834791774 | 1.445745 | -0.48869 | 1.093455 | YHR218W   |
| 0.080500048 | 0.052131095 | 0.55065098  | 0.152746 | -0.20923 | 0.214163 | UBP14     |

|             |             |                                                  |
|-------------|-------------|--------------------------------------------------|
| 0.080500048 | 0.147880106 | 1 -0.13054 0.139099 0.014895 YML6                |
| 0.080541745 | 0.011964436 | 0.074765706 0.131446 0.224407 -0.37014 YBR016W   |
| 0.080605211 | 0.38127191  | 0.642194109 0.104717 -0.07499 0.126804 WRS1      |
| 0.080935269 | 0.119099734 | 0.87592683 -0.75459 -0.87206 0.51669 YHR213W-/   |
| 0.080935269 | 0.063115794 | 0.902276563 0.209169 -0.27656 0.118356 SAC3      |
| 0.081044166 | 0.433392057 | 0.479745932 0.283694 0.184604 -0.43907 RAD10     |
| 0.081287775 | 0.885748557 | 0.770752057 -0.18587 -0.03378 0.16554 PSY2       |
| 0.081628846 | 0.620115135 | 0.530625906 -0.12423 0.056081 -0.17914 YGR266W   |
| 0.081634803 | 0.92384638  | 0.553808105 -0.17958 0.025015 -0.24959 MOB1      |
| 0.081634803 | 0.986843508 | 0.848379499 -0.18987 -0.01283 -0.13379 NVJ3      |
| 0.081634803 | 0.758146893 | 0.871950707 -0.20334 0.063249 -0.13025 YHK8      |
| 0.081634803 | 1           | 0.995247182 -0.2385 0.002317 -0.06486 PDR10      |
| 0.081638445 | 0.630001142 | 0.7990478 -0.25639 -0.11323 -0.2112 KNH1         |
| 0.081726647 | 0.081781284 | 1 0.113573 -0.14266 0.011399 VAN1                |
| 0.081939743 | 0.686392021 | 0.545272974 0.856505 0.327761 1.223691 HED1      |
| 0.082025817 | 0.327426468 | 0.23260457 0.855444 0.673973 1.879548 YGL149W    |
| 0.082040876 | 0.690335313 | 0.279646275 -0.11027 0.041881 0.224438 RPL5      |
| 0.082418277 | 0.427826936 | 0.223097491 0.112406 0.074043 0.249389 RPS1A     |
| 0.082716152 | 0.486638529 | 0.055048108 -0.54051 -0.31797 -1.76551 None      |
| 0.082727509 | 0.659994539 | 1 0.260919 0.107948 -0.03943 TPC1                |
| 0.083408653 | 1           | 0.739091337 0.325365 -0.00246 -0.31543 ECM27     |
| 0.08343532  | 0.663724282 | 0.76367822 -0.12271 0.050062 0.112331 MRPL3      |
| 0.083442525 | 5.87959E-05 | 0.748420004 -0.13934 -0.34701 -0.13194 CYK3      |
| 0.083533022 | 0.842773453 | 0.786584362 -0.12717 0.028703 0.109151 SRP102    |
| 0.083533022 | 0.433535321 | 0.807027851 -0.56441 -0.36885 0.467668 YOR072W   |
| 0.083957634 | 0.270460422 | 0.385959394 0.214669 0.1875 0.379744 YBR230W-/   |
| 0.083957634 | 0.012515571 | 0.750952753 -0.12987 -0.22267 0.122311 FAP1      |
| 0.083970593 | 0.330237847 | 0.680777882 0.15428 -0.12229 0.175516 RMD1       |
| 0.084278831 | 0.806573971 | 0.525568993 -0.12589 0.03287 -0.18441 CPS1       |
| 0.084285462 | 0.851320842 | 0.598545037 -1.71935 -0.36331 2.363422 None      |
| 0.08452345  | 0.52364909  | 0.781704944 0.176034 -0.09752 -0.154 OCA5        |
| 0.084639969 | 0.516700017 | 0.728625888 0.142741 -0.08013 -0.14329 PRR1      |
| 0.085111035 | 0.359386016 | 0.795907717 0.136241 -0.1029 0.114557 MKT1       |
| 0.085664359 | 0.900565868 | 0.036431385 -0.13578 -0.02253 0.446786 LRP1      |
| 0.085681825 | 0.415045535 | 0.822329423 0.184498 -0.12577 -0.1445 STE11      |
| 0.085956547 | 0.363817999 | 0.196724326 1.966455 -1.52854 -5.94997 None      |
| 0.086021287 | 0.693518654 | 0.43642005 0.130645 0.049721 -0.21771 LIP5       |
| 0.086041434 | 0.480589154 | 0.567844831 -0.68998 -0.41459 -0.98807 YRF1-1    |
| 0.086207508 | 0.903977193 | 0.930420244 -0.61011 0.098173 0.290677 YOR032W-/ |
| 0.086275937 | 0.0122332   | 0.742563863 0.176906 -0.30799 0.172226 SIN4      |
| 0.087338893 | 0.894434943 | 0.049893598 0.166418 -0.02907 -0.5185 PCL6       |
| 0.087769753 | 0.209645547 | 0.990208543 0.130256 -0.12695 0.038052 EBS1      |
| 0.087769753 | 0.469895523 | 0.998440996 0.201685 -0.12557 0.054026 PXL1      |
| 0.088154937 | 0.631437679 | 0.533641348 -0.15093 0.067567 -0.22053 HSH49     |
| 0.088569596 | 0.024098511 | 0.119906082 0.133982 0.212973 -0.35294 GOR1      |
| 0.088569596 | 0.337257493 | 0.155888434 -0.14124 0.111103 0.352588 GPN2      |
| 0.088712033 | 0.832733162 | 0.480256366 -0.97581 -0.22881 1.595478 None      |
| 0.088829712 | 0.940649911 | 0.967394603 0.131759 -0.01615 -0.04975 ABZ1      |
| 0.088881505 | 0.083848492 | 0.861496883 0.17309 -0.22086 -0.11938 BUD4       |
| 0.089073769 | 0.118813668 | 0.795907717 -0.2081 0.241927 0.176871 None       |
| 0.089265095 | 0.734684065 | 1 1.188684 0.411485 -0.09316 YKL102C             |
| 0.089696918 | 0.666883176 | 0.817868751 -0.20552 0.08442 -0.16428 YNR048W    |
| 0.090386028 | 0.424705765 | 0.770482483 0.199226 0.135194 -0.18244 SRN2      |
| 0.09047873  | 0.15834968  | 0.919926509 0.112176 0.120615 0.057991 YPL199C   |

|             |             |             |          |          |                    |
|-------------|-------------|-------------|----------|----------|--------------------|
| 0.090512727 | 0.757783308 | 1 -0.16978  | 0.05437  | 0.036551 | SWD3               |
| 0.090866044 | 0.500629099 | 0.194043747 | 0.095633 | -0.05627 | 0.226533 PRT1      |
| 0.090866044 | 0.384327883 | 0.997805152 | 0.200705 | -0.14745 | 0.054639 PRP22     |
| 0.091018551 | 0.926213546 | 0.536035164 | -0.21238 | 0.029793 | 0.312312 MTF2      |
| 0.091166686 | 0.864979821 | 0.838466151 | -0.75358 | -0.15624 | -0.56981 AMA1      |
| 0.091264445 | 0.066428344 | 0.964698121 | 0.133324 | -0.17948 | 0.051977 NMT1      |
| 0.091612207 | 0.414293185 | 0.457578646 | 0.129542 | -0.08978 | -0.2135 PHA2       |
| 0.09182856  | 0.062102203 | 0.89987755  | -1.02771 | 1.355565 | -0.68477 None      |
| 0.091919767 | 0.165414541 | 0.781154036 | -0.14931 | 0.158601 | 0.133437 AIM7      |
| 0.092050145 | 0.11971678  | 0.927619939 | 0.176349 | -0.20846 | 0.087633 URC2      |
| 0.092561279 | 0.038719477 | 1 -0.18459  | -0.27575 | -0.01544 | IFH1               |
| 0.092755084 | 0.121546688 | 1 0.125287  | -0.14714 | -0.02324 | PMI40              |
| 0.09286394  | 0.04046433  | 0.438612707 | 0.180811 | -0.26904 | 0.307681 ORC2      |
| 0.09286394  | 0.119522468 | 1 0.278646  | 0.328229 | -0.01714 | EMP46              |
| 0.092890138 | 0.010362697 | 0.291512883 | -0.1324  | -0.23889 | 0.271764 TSR1      |
| 0.093196993 | 0.295242295 | 0.630202471 | 0.133547 | 0.114889 | -0.17024 YKL023W   |
| 0.09333977  | 8.03946E-05 | 0.589775129 | 0.136168 | 0.341285 | 0.185833 NNR1      |
| 0.093360294 | 1           | 0.919926509 | 0.1212   | -0.00512 | -0.06358 MIT1      |
| 0.093592446 | 0.003378115 | 0.229407061 | 0.115716 | -0.23289 | 0.262339 KEL3      |
| 0.093670407 | 0.019075148 | 0.937363635 | -0.18475 | 0.306836 | 0.084422 YGR021W   |
| 0.093856953 | 0.418012386 | 0.005535976 | 0.187833 | 0.13004  | -0.7782 YJL163C    |
| 0.094156347 | 0.486096013 | 1 0.24761   | -0.15206 | -0.02496 | WHI5               |
| 0.094369839 | 0.103376814 | 1 -0.22026  | -0.26995 | 0.019336 | RDS1               |
| 0.094539124 | 8.62465E-05 | 0.359252765 | 0.174612 | 0.437234 | -0.32777 PYK2      |
| 0.094663369 | 0.715818525 | 0.8119342   | 0.115187 | -0.04249 | -0.0951 KAE1       |
| 0.094682911 | 0.190275098 | 0.786909408 | -0.15829 | -0.16241 | 0.139856 DED1      |
| 0.09481842  | 0.925573198 | 0.834202861 | 0.194947 | -0.02797 | -0.15145 VPS8      |
| 0.09515606  | 0.633340819 | 0.945866293 | 0.148709 | 0.067833 | 0.065614 CFD1      |
| 0.09546524  | 0.010389369 | 0.680110665 | 0.1053   | 0.19086  | 0.123672 PHB1      |
| 0.096226389 | 7.47611E-05 | 0.581268517 | -0.10997 | 0.278069 | 0.152997 IDH2      |
| 0.097020659 | 0.056211261 | 1 -0.21597  | -0.30454 | -0.01184 | SPP41              |
| 0.097182964 | 0.068517075 | 0.493450262 | -1.21274 | -1.74215 | -2.70988 None      |
| 0.097713955 | 0.302233138 | 0.934721444 | 0.214655 | -0.18498 | -0.1014 YLL054C    |
| 0.097767968 | 0.398327474 | 0.21536472  | -0.09278 | -0.06707 | 0.216664 GAS1      |
| 0.097923039 | 0.634501741 | 0.689510419 | 0.163148 | -0.07477 | -0.18922 YME1      |
| 0.097942701 | 0.317422835 | 0.468849245 | -0.15024 | 0.125401 | 0.248058 YPR098C   |
| 0.098249329 | 0.54489641  | 0.933469902 | 0.114432 | -0.06328 | -0.05434 PAF1      |
| 0.098302725 | 0.758162333 | 1 -2.28012  | 0.71376  | -0.84653 | None               |
| 0.098389748 | 0.996960041 | 0.883095126 | 0.122741 | -0.00682 | -0.07894 GPI17     |
| 0.098389748 | 0.938960046 | 0.977348163 | -0.17788 | 0.022861 | -0.06137 CDC8      |
| 0.098430098 | 0.093744452 | 0.669524096 | 0.150708 | -0.19248 | 0.182316 EPS1      |
| 0.098438245 | 0.761075278 | 1 -2.27899  | 0.699453 | -0.82951 | None               |
| 0.098438245 | 0.761075278 | 1 -2.27899  | 0.699461 | -0.82952 | None               |
| 0.098791499 | 0.630213798 | 0.313687377 | 0.1039   | -0.04823 | 0.211419 IMD4      |
| 0.099672929 | 0.99176478  | 1 0.16214   | 0.010351 | -0.0168  | UBP12              |
| 0.099889902 | 0.196724669 | 1 2.240571  | 2.289187 | 3.174056 | YHR054C            |
| 0.099956566 | 1           | 0.973674102 | 0.781787 | 0.026757 | -0.28541 YPL152W-1 |
| 0.100046999 | 0.4395426   | 0.612191336 | -0.10401 | 0.07034  | 0.139335 RNA1      |
| 0.100081755 | 0.934743268 | 1 -0.13684  | -0.01839 | 0.019767 | SIC1               |
| 0.100336315 | 0.447335758 | 0.812812583 | 0.130912 | 0.087336 | -0.10918 YMR178W   |
| 0.10044338  | 0.612847593 | 0.104201741 | 0.326994 | -0.16049 | 0.924592 None      |
| 0.10044338  | 0.885106299 | 0.5927044   | 0.157642 | -0.03068 | -0.21784 YOL029C   |
| 0.100588686 | 0.572909529 | 0.318346243 | -1.91658 | -0.9526  | 4.246737 None      |
| 0.100645254 | 0.177522395 | 0.560749891 | -1.4507  | 1.459646 | -2.47615 MPH2      |

|              |              |              |           |           |           |                   |
|--------------|--------------|--------------|-----------|-----------|-----------|-------------------|
| 0. 100865643 | 0. 290286754 | 0. 990208543 | -0. 12216 | 0. 107909 | -0. 03678 | PMC1              |
| 0. 101107224 | 0. 410728813 | 0. 343092466 | -0. 13189 | 0. 09422  | -0. 25765 | SYF2              |
| 0. 101107224 | 0. 486326234 | 0. 448655387 | -0. 67101 | 0. 407589 | -1. 17609 | None              |
| 0. 101107224 | 0. 413974827 | 0. 967394603 | 0. 167737 | -0. 1195  | -0. 0661  | RIC1              |
| 0. 101107224 | 0. 661428602 | 0. 985468267 | -0. 18154 | 0. 078386 | -0. 05687 | ULA1              |
| 0. 101112345 | 0. 91970774  | 0. 099020366 | -0. 11276 | 0. 017103 | 0. 320978 | MRT4              |
| 0. 101569035 | 0. 461663229 | 1            | 0. 141631 | 0. 0925   | 0. 013776 | RPE1              |
| 0. 101770912 | 0. 586552276 | 0. 90453709  | 0. 141612 | -0. 07312 | -0. 08352 | BRF1              |
| 0. 102046681 | 0. 639535568 | 0. 840282548 | -0. 11698 | -0. 0535  | 0. 090182 | GNT1              |
| 0. 102046681 | 0. 199639017 | 1            | 2. 22021  | 2. 268632 | 3. 14987  | None              |
| 0. 102046681 | 0. 199639017 | 1            | 2. 220209 | 2. 268631 | 3. 149869 | None              |
| 0. 102046681 | 0. 199639017 | 1            | 2. 220242 | 2. 268665 | 3. 149884 | None              |
| 0. 102047446 | 0. 199639017 | 1            | 2. 220114 | 2. 268534 | 3. 149827 | None              |
| 0. 10205299  | 0. 109416283 | 0. 66765157  | -1. 49295 | -1. 95324 | 2. 424267 | None              |
| 0. 102306828 | 0. 382001694 | 0. 584673159 | 0. 193726 | -0. 14747 | 0. 274178 | NUP192            |
| 0. 102357091 | 0. 09990881  | 0. 972387712 | -0. 11278 | -0. 14249 | -0. 04139 | PIR1              |
| 0. 102500492 | 0. 406828448 | 0. 506625282 | 1. 215067 | 0. 87152  | -2. 05774 | None              |
| 0. 103033071 | 0. 990080396 | 0. 182529351 | -0. 98196 | -0. 06278 | -2. 93529 | None              |
| 0. 103434452 | 0. 422272348 | 0. 775955771 | 0. 159831 | -0. 11306 | -0. 1496  | TAF1              |
| 0. 103762762 | 0. 102434008 | 0. 010294461 | -0. 11176 | -0. 14082 | 0. 450568 | ENP2              |
| 0. 103803484 | 0. 368966584 | 0. 71503018  | 0. 191872 | -0. 15018 | 0. 21166  | RTP1              |
| 0. 103803923 | 0. 690335313 | 1            | 0. 165581 | -0. 067   | -0. 00664 | UFE1              |
| 0. 103821968 | 0. 355796735 | 0. 691419277 | 0. 161606 | -0. 12942 | -0. 18959 | HIR1              |
| 0. 104206933 | 0. 616558301 | 0. 024892656 | 0. 180173 | 0. 087665 | -0. 6555  | PPE1              |
| 0. 106302676 | 0. 652629347 | 0. 635167376 | 0. 259319 | 0. 11667  | -0. 34022 | YIR018C- <i>l</i> |
| 0. 106565171 | 0. 869328337 | 0. 906168502 | -0. 09804 | 0. 020891 | 0. 05765  | SEC13             |
| 0. 106625687 | 0. 750994992 | 0. 579999612 | 0. 107873 | 0. 037088 | 0. 15496  | SEC4              |
| 0. 106712016 | 0. 933553067 | 0. 493704454 | -0. 70952 | 0. 096816 | 1. 161562 | None              |
| 0. 106737957 | 0. 567058038 | 0. 078502393 | -0. 12153 | 0. 065895 | 0. 366163 | RPS23A            |
| 0. 106737957 | 0. 46811084  | 0. 600528962 | 0. 137051 | 0. 089827 | 0. 190449 | AIM29             |
| 0. 10684567  | 0. 438949356 | 0. 667670933 | -0. 13233 | 0. 091189 | 0. 16415  | PTH2              |
| 0. 106870114 | 0. 543950269 | 0. 929303164 | 0. 111941 | -0. 06349 | 0. 056709 | PMU1              |
| 0. 107118748 | 0. 648018557 | 0. 333626467 | -1. 53153 | -0. 67272 | -3. 79734 | YFL066C           |
| 0. 107469917 | 0. 440961232 | 0. 553808105 | -0. 12954 | -0. 08911 | -0. 19389 | YGL185C           |
| 0. 107624386 | 0. 378159684 | 1            | -0. 15682 | 0. 121166 | 0. 01936  | SAM37             |
| 0. 107636241 | 0. 643653231 | 0. 976568193 | -0. 20471 | 0. 093776 | 0. 072783 | PRP46             |
| 0. 107851325 | 0. 011832562 | 0. 95557089  | -0. 13252 | -0. 24512 | -0. 05708 | MCD1              |
| 0. 108039666 | 0. 017598231 | 1            | 1. 62694  | -3. 66259 | -1. 76097 | None              |
| 0. 108039666 | 0. 91441715  | 1            | -0. 19386 | -0. 03118 | -0. 0333  | SWC5              |
| 0. 108087639 | 0. 259482058 | 0. 971609311 | -0. 46208 | 0. 433777 | 0. 173857 | AIM26             |
| 0. 108211705 | 0. 065404264 | 0. 033854211 | -0. 11609 | -0. 16364 | 0. 409932 | TOD6              |
| 0. 108252258 | 0. 000167114 | 0. 737914729 | -0. 21397 | 0. 534975 | 0. 22236  | YBL029C- <i>l</i> |
| 0. 108270739 | 0. 093895807 | 0. 55065098  | -0. 54441 | 0. 696316 | -0. 82188 | MCH2              |
| 0. 108379644 | 0. 853463958 | 0. 195294516 | -0. 28295 | 0. 065256 | -0. 69493 | RHO2              |
| 0. 108551218 | 0. 502734634 | 0. 974952294 | 0. 187831 | -0. 11562 | -0. 06909 | TFC3              |
| 0. 108826478 | 0. 613821587 | 0. 03528112  | -0. 09391 | -0. 04649 | 0. 3306   | SSF1              |
| 0. 109086871 | 0. 079535843 | 0. 020319939 | -0. 15118 | 0. 204826 | 0. 573014 | TMA7              |
| 0. 109086871 | 0. 712618958 | 1            | -0. 16481 | -0. 06375 | 0. 02619  | MDM30             |
| 0. 109357675 | 0. 012013871 | 0. 201505014 | 1. 07991  | 2. 068813 | -3. 52759 | RGI2              |
| 0. 109811683 | 1            | 0. 635840497 | -0. 12527 | 0. 003575 | 0. 165612 | GAA1              |
| 0. 109867939 | 0. 897457836 | 0. 259414235 | -0. 38252 | 0. 068829 | 0. 863494 | SSP2              |
| 0. 109950484 | 0. 017246708 | 0. 721271027 | 0. 120059 | -0. 21283 | 0. 131735 | GCD2              |
| 0. 110688895 | 0. 613304251 | 0. 053817845 | -0. 12299 | 0. 061221 | 0. 403212 | NIP7              |
| 0. 110771731 | 0. 766166784 | 0. 680475561 | -0. 46652 | -0. 151   | -0. 57639 | PDC6              |

|              |              |              |           |           |           |                   |       |
|--------------|--------------|--------------|-----------|-----------|-----------|-------------------|-------|
| 0. 110771731 | 0. 760915703 | 0. 89043028  | -0. 11349 | 0. 037719 | 0. 07253  | ECT1              |       |
| 0. 110825675 | 0. 414006447 | 0. 238946444 | -0. 59009 | 0. 420094 | -1. 42519 | YOR008C- <i>l</i> |       |
| 0. 111196127 | 0. 846089519 | 0. 539256261 | 0. 143942 | 0. 034661 | -0. 22212 | SIW14             |       |
| 0. 111459749 | 0. 000378952 | 0. 82890057  | 0. 223044 | 0. 54068  | 0. 183298 | ADR1              |       |
| 0. 111639464 | 0. 668689933 | 0. 792753853 | -0. 18925 | 0. 082011 | -0. 17207 | GTR2              |       |
| 0. 111639464 | 0. 934743268 |              | 1         | -0. 82786 | 0. 111856 | -0. 09411         | None  |
| 0. 111653925 | 0. 568136366 |              | 1         | -0. 20539 | -0. 11266 | -0. 03752         | CTF3  |
| 0. 111653925 | 0. 868862376 |              | 1         | 0. 173914 | 0. 037771 | -0. 0043          | PRP42 |
| 0. 111930779 | 0. 645309081 | 0. 772090669 | 0. 199431 | 0. 09238  | 0. 192898 | FTR1              |       |
| 0. 112104295 | 0. 901784303 | 0. 929821526 | -1. 17618 | -0. 20178 | 0. 628929 | None              |       |
| 0. 112633189 | 0. 752831669 | 0. 770752057 | -1. 40838 | -0. 47282 | -1. 45169 | None              |       |
| 0. 113660248 | 0. 654688585 | 0. 607199601 | 0. 144312 | -0. 06569 | 0. 202496 | ALG12             |       |
| 0. 113660248 | 1            | 0. 98500242  | 0. 139492 | -0. 00321 | 0. 046405 | YPT7              |       |
| 0. 11456337  | 0. 9338778   | 0. 637213394 | -0. 10785 | 0. 015243 | 0. 143821 | PRS4              |       |
| 0. 114592878 | 0. 721891429 | 0. 689510419 | 0. 124875 | -0. 04777 | 0. 151735 | ERV41             |       |
| 0. 115133153 | 0. 881928588 | 0. 740020932 | 0. 182872 | -0. 03789 | 0. 193083 | VPS52             |       |
| 0. 115223659 | 0. 887445308 | 0. 32895061  | 0. 224882 | -0. 04444 | -0. 46335 | DNA2              |       |
| 0. 115310991 | 0. 353343062 | 0. 018502313 | -0. 11605 | 0. 095409 | 0. 452693 | RPL27A            |       |
| 0. 115310991 | 0. 665438196 | 0. 477818318 | -0. 12743 | -0. 05651 | -0. 21742 | CSE4              |       |
| 0. 115845609 | 0. 093890302 | 0. 24850108  | -0. 10206 | -0. 1358  | 0. 237805 | NOC2              |       |
| 0. 116129764 | 0. 525161659 | 0. 688444366 | -1. 62832 | -0. 94111 | -2. 00154 | YDL022C- <i>l</i> |       |
| 0. 116350236 | 0. 616539813 | 0. 635840497 | 0. 167787 | -0. 08427 | -0. 22531 | MAC1              |       |
| 0. 116520471 | 0. 842773453 | 0. 960632458 | -0. 76023 | 0. 184962 | -0. 33062 | None              |       |
| 0. 116574302 | 0. 625421668 | 0. 37953299  | 0. 111964 | 0. 054963 | 0. 218455 | EFB1              |       |
| 0. 116624977 | 0. 347668023 | 0. 035829221 | -0. 12914 | 0. 107466 | 0. 462203 | RPL35B            |       |
| 0. 116624977 | 1            | 0. 211271753 | -0. 78735 | 0. 027589 | 1. 982568 | CDA1              |       |
| 0. 116624977 | 0. 407136042 | 0. 589139583 | -1. 04581 | 0. 750473 | -1. 59859 | None              |       |
| 0. 11771097  | 0. 997790364 | 0. 373162993 | -0. 11628 | 0. 006553 | 0. 228948 | YPR114W           |       |
| 0. 11771097  | 0. 230911149 | 0. 486872846 | -0. 15864 | 0. 160736 | 0. 268832 | RPB11             |       |
| 0. 11771097  | 0. 58018556  | 0. 823211814 | -0. 12715 | -0. 06911 | 0. 107609 | UBR1              |       |
| 0. 117749068 | 0. 099649048 | 0. 983370642 | 0. 17199  | -0. 22752 | 0. 058982 | JJJ1              |       |
| 0. 117843016 | 0. 645773604 | 0. 441597935 | -0. 1826  | 0. 085414 | -0. 32779 | CTA1              |       |
| 0. 118179103 | 0. 080514417 | 0. 97097406  | -0. 90011 | -1. 29611 | -0. 38584 | YFR032C-I         |       |
| 0. 118189112 | 0. 558914109 | 0. 777667569 | 0. 142859 | 0. 081224 | -0. 13824 | MAD2              |       |
| 0. 118339854 | 0. 61447221  | 0. 143859218 | 0. 183254 | -0. 09319 | -0. 50238 | YDR338C           |       |
| 0. 118359491 | 0. 770350536 |              | 1         | 0. 163087 | -0. 05311 | 0. 017588         | TMA64 |
| 0. 118682266 | 0. 984954183 | 0. 942108564 | 0. 164749 | 0. 012934 | -0. 07847 | MSL1              |       |
| 0. 118713318 | 0. 490088889 | 0. 927131674 | 0. 150958 | -0. 09765 | 0. 080892 | YPR117W           |       |
| 0. 119268546 | 0. 59221262  | 0. 37055688  | 0. 133057 | -0. 07104 | -0. 26402 | YML119W           |       |
| 0. 11928709  | 0. 706086243 | 0. 978193638 | -0. 13324 | 0. 05373  | -0. 04793 | YKE4              |       |
| 0. 119374199 | 0. 098108702 | 0. 924605282 | -0. 14962 | 0. 197613 | 0. 081063 | YPT10             |       |
| 0. 119374199 | 0. 313232327 |              | 1         | -0. 14091 | 0. 125018 | -0. 02989         | SPC2  |
| 0. 119383592 | 1            | 0. 404219832 | 0. 096276 | 0. 001671 | 0. 183066 | TIF35             |       |
| 0. 119383592 | 0. 716376728 | 0. 862693719 | -0. 31917 | -0. 12472 | -0. 23756 | YPR064W           |       |
| 0. 119383592 | 0. 818564873 |              | 1         | -0. 17577 | -0. 04858 | -0. 04674         | PLP1  |
| 0. 119428443 | 0. 283359769 | 0. 056523979 | 1. 32269  | -1. 32038 | -6. 21142 | YRF1-6            |       |
| 0. 119455969 | 0. 050780234 | 0. 020319939 | -0. 12437 | 0. 189208 | 0. 483709 | RPL30             |       |
| 0. 119455969 | 0. 438949356 | 0. 772424036 | 0. 474021 | -0. 34362 | 0. 469863 | YMR105W- <i>l</i> |       |
| 0. 11952422  | 0. 002104078 |              | 1         | -0. 09319 | 0. 206427 | 0. 014471         | LSP1  |
| 0. 120204774 | 0. 937034346 | 0. 795458324 | -0. 12288 | 0. 016995 | 0. 113742 | FCF1              |       |
| 0. 120210012 | 0. 166873945 | 0. 699105653 | 0. 121688 | 0. 139215 | 0. 146805 | COQ5              |       |
| 0. 120842025 | 0. 801294446 |              | 1         | -0. 09941 | 0. 029217 | 0. 023876         | TUB1  |
| 0. 121208428 | 0. 138242749 | 0. 971609311 | 0. 148139 | -0. 18094 | -0. 05796 | RGD1              |       |
| 0. 121766241 | 0. 019725812 | 0. 90453709  | 0. 290613 | 0. 517417 | -0. 17959 | YMR085W           |       |



|              |              |                                                      |
|--------------|--------------|------------------------------------------------------|
| 0. 121823926 | 0. 887204289 | 1 -0. 21737 -0. 04362 0. 042104 PET111               |
| 0. 12204285  | 0. 079562974 | 0. 536035164 0. 155968 -0. 22032 -0. 24929 ESC8      |
| 0. 122067735 | 0. 51601516  | 1 0. 236359 -0. 14692 -0. 00357 STU1                 |
| 0. 122157469 | 0. 926213546 | 0. 5888858 0. 095619 -0. 0146 -0. 14065 LAP3         |
| 0. 122181278 | 0. 012312882 | 0. 468714964 0. 119896 -0. 2285 0. 211557 SSM4       |
| 0. 122422575 | 0. 82837317  | 1 -0. 22589 -0. 06048 0. 002831 INP2                 |
| 0. 122924904 | 0. 270400357 | 0. 648340079 0. 248817 -0. 24222 -0. 33276 SSN2      |
| 0. 123187213 | 0. 481758197 | 0. 731592804 -0. 12685 0. 08407 0. 140149 LS02       |
| 0. 123187213 | 0. 984954183 | 0. 901225243 -0. 60034 -0. 04719 0. 383272 YLR255C   |
| 0. 123283286 | 0. 295659    | 0. 112708349 -0. 45997 -0. 42806 -1. 4555 MPH3       |
| 0. 12349326  | 0. 398327474 | 0. 889079564 -0. 11163 -0. 08634 -0. 07469 ADE13     |
| 0. 123589632 | 0. 164194878 | 1 -2. 12165 2. 376486 -3. 2215 PFS1                  |
| 0. 123589632 | 0. 164194878 | 1 -2. 1217 2. 376528 -3. 22151 None                  |
| 0. 123767111 | 0. 021155099 | 0. 852710995 0. 188293 0. 334413 -0. 14637 GLO4      |
| 0. 124165198 | 0. 909881518 | 1 2. 073402 0. 371842 0. 478202 YBL112C              |
| 0. 124165198 | 0. 909881518 | 1 2. 073412 0. 371857 0. 478214 None                 |
| 0. 124348898 | 0. 023493222 | 0. 077306681 0. 102079 -0. 17972 0. 323389 BUD22     |
| 0. 124416325 | 0. 128547958 | 0. 006666491 -0. 12854 0. 160275 0. 568999 RPL42A    |
| 0. 124544888 | 0. 740566016 | 0. 390228331 0. 203392 -0. 07558 -0. 39759 YBR197C   |
| 0. 124580565 | 0. 190369044 | 0. 472057083 -0. 1485 0. 164014 0. 261229 SUV3       |
| 0. 124692313 | 0. 598077776 | 0. 950592115 -0. 17763 0. 094463 -0. 08231 CSM3      |
| 0. 125041718 | 0. 384001707 | 0. 7232059 -0. 18832 0. 150186 0. 212273 EFM6        |
| 0. 125085808 | 0. 356552847 | 0. 499155534 0. 134857 0. 113435 0. 229163 CPR2      |
| 0. 125085808 | 0. 890649696 | 0. 848611069 -0. 26187 0. 051487 -0. 20604 SMK1      |
| 0. 125581158 | 0. 001186688 | 0. 071166723 0. 106383 -0. 25106 0. 343248 MTR4      |
| 0. 125700911 | 0. 305163905 | 0. 931005601 -0. 13283 -0. 12167 0. 06897 BRE2       |
| 0. 126143817 | 0. 374729788 | 0. 731592804 0. 161 0. 131722 -0. 17882 YTH1         |
| 0. 126200035 | 0. 006994212 | 1 -0. 13779 -0. 28187 -0. 00628 BCK2                 |
| 0. 126334341 | 0. 184156664 | 0. 05005618 -0. 10641 0. 119415 0. 367036 ASC1       |
| 0. 126868753 | 0. 111467148 | 0. 182165955 -0. 1027 0. 134199 0. 27127 YPL225W     |
| 0. 126872643 | 0. 560120507 | 0. 871066692 0. 110481 -0. 06412 -0. 08052 PAT1      |
| 0. 126889812 | 0. 746926462 | 0. 863626849 -0. 13966 0. 050943 0. 104918 EMC3      |
| 0. 126984855 | 1            | 0. 659101564 -0. 18218 0. 007001 -0. 2419 MRX8       |
| 0. 127120516 | 0. 542558974 | 0. 845430426 -0. 17457 -0. 10413 -0. 14133 EST1      |
| 0. 127630528 | 0. 224234386 | 0. 622714429 0. 269466 -0. 28599 -0. 38013 SPP381    |
| 0. 127702117 | 0. 017055604 | 0. 976568193 0. 189821 -0. 35322 -0. 07106 HSL1      |
| 0. 1277632   | 0. 194075919 | 0. 711421266 0. 109686 0. 1218 0. 129991 SNF4        |
| 0. 127954576 | 0. 570704752 | 0. 302955543 -0. 21132 0. 119464 0. 467479 CBS1      |
| 0. 127963229 | 0. 479033885 | 0. 8119342 1. 564697 -1. 08688 -1. 75037 None        |
| 0. 128274617 | 0. 759694936 | 0. 996250082 0. 125496 -0. 04397 -0. 03824 TAF5      |
| 0. 12848951  | 0. 437664279 | 0. 054954576 -0. 11264 0. 08217 0. 384296 RPL20B     |
| 0. 128828587 | 0. 991616462 | 0. 949031652 0. 136896 0. 009453 0. 064855 NTG1      |
| 0. 128947576 | 0. 846089519 | 0. 240761747 -0. 12917 0. 032386 0. 315079 EMC5      |
| 0. 129967763 | 0. 203402724 | 0. 846605423 -0. 18872 0. 205985 -0. 15263 MRS1      |
| 0. 129990038 | 0. 131282664 | 0. 503789088 0. 134486 -0. 17005 0. 230291 YEF3      |
| 0. 129990038 | 0. 829818589 | 0. 679433873 0. 171861 0. 046881 -0. 22041 PSY3      |
| 0. 130054426 | 0. 087597502 | 0. 085125736 -0. 11077 -0. 15515 0. 348361 UTP21     |
| 0. 130224059 | 0. 284831522 | 0. 151369301 -0. 13402 0. 128698 0. 375597 MRP7      |
| 0. 130289609 | 0. 448109038 | 0. 637177071 -0. 12945 0. 09273 0. 179509 YEL068C    |
| 0. 131026092 | 0. 395417127 | 0. 702868145 -0. 11475 0. 090871 -0. 13959 CMK1      |
| 0. 131131765 | 0. 926213546 | 0. 886876142 -0. 09988 0. 015547 0. 069112 CIS3      |
| 0. 131239379 | 0. 832549245 | 1 0. 53474 0. 144466 0. 156222 YDR344C               |
| 0. 131428483 | 0. 51219348  | 0. 992021238 -0. 34031 0. 215569 0. 108838 SPS1      |
| 0. 131819221 | 0. 031130308 | 0. 702041373 0. 649785 -1. 17478 0. 864036 YDL159W-/ |

|             |             |             |          |          |          |         |
|-------------|-------------|-------------|----------|----------|----------|---------|
| 0.13189085  | 0.276302587 | 0.354608469 | 0.166002 | -0.16352 | -0.34663 | STB5    |
| 0.132012838 | 0.575041968 | 0.917776548 | 0.158598 | -0.0905  | 0.09312  | RGP1    |
| 0.132076218 | 0.768288475 | 0.868996053 | 0.125815 | -0.04274 | -0.09416 | ARK1    |
| 0.132272514 | 0.979425666 | 0.477818318 | 0.089945 | 0.008031 | -0.16    | GDH1    |
| 0.132798086 | 0.563145324 | 0.995137276 | -0.14381 | 0.083804 | 0.044806 | CHS7    |
| 0.132925903 | 0.98811108  | 0.688444366 | 0.642185 | 0.048104 | 0.821785 | None    |
| 0.132925903 | 0.349120443 | 0.69956533  | -0.37216 | 0.319054 | 0.45869  | RRT5    |
| 0.132972136 | 0.858414089 | 0.970494097 | -0.31334 | -0.07537 | -0.12993 | None    |
| 0.133109268 | 0.129290846 | 0.812322751 | -0.13585 | -0.17338 | 0.123474 | LAS21   |
| 0.133274899 | 0.04003014  | 0.597863762 | 0.160418 | -0.26539 | -0.23947 | RMD8    |
| 0.133590398 | 0.515509269 | 0.551545293 | -0.09795 | 0.062356 | 0.157081 | ECM14   |
| 0.13399311  | 0.118712454 | 0.960632458 | 0.145891 | -0.19244 | 0.065739 | LYS14   |
| 0.134137995 | 0.751310355 | 0.712613882 | 0.161617 | -0.05962 | 0.193348 | KTR5    |
| 0.135057835 | 0.119536849 | 0.71733135  | 0.148969 | -0.19623 | 0.176369 | STB4    |
| 0.135223143 | 0.952836649 | 0.971609311 | -0.18634 | 0.022951 | 0.075589 | MTF1    |
| 0.135738245 | 0.58105513  | 0.804032062 | 0.135817 | 0.077164 | -0.12685 | CBP2    |
| 0.136004824 | 0.411661642 | 0.274807381 | 0.11166  | 0.087097 | 0.263467 | FET5    |
| 0.136656078 | 1           | 0.598636186 | 0.144936 | 0.006105 | 0.217939 | GPI10   |
| 0.137173238 | 0.587029779 | 0.995137276 | -0.97798 | -0.54338 | -0.30908 | None    |
| 0.137238453 | 0.38127191  | 0.726816534 | -0.09456 | -0.07831 | 0.108987 | MNN2    |
| 0.137430243 | 0.395362483 | 0.411976149 | 0.124186 | -0.10038 | -0.24286 | SSK2    |
| 0.13784725  | 0.404471627 | 0.962145993 | -0.14759 | 0.116615 | -0.06587 | RIB7    |
| 0.137933322 | 0.07973457  | 0.861885315 | 0.185205 | -0.27131 | 0.144855 | CDC39   |
| 0.138615937 | 0.225458217 | 0.87710821  | 0.104208 | -0.1127  | 0.075728 | EMC1    |
| 0.138788951 | 0.619870553 | 0.733389979 | 0.226661 | 0.11912  | -0.2582  | DFG10   |
| 0.138866999 | 0.86684094  | 1           | -0.16621 | -0.03893 | -0.01727 | POP4    |
| 0.139155861 | 0.971546998 | 0.831867858 | -0.15467 | 0.015511 | -0.1347  | ISM1    |
| 0.1393801   | 0.648020755 | 0.940508159 | 0.150997 | -0.07456 | 0.076351 | YML002W |
| 0.139494092 | 0.117256154 | 0.937179795 | 1.000303 | 1.340486 | 0.595945 | None    |
| 0.140549257 | 0.969492509 | 0.453670338 | -0.15921 | 0.016513 | -0.29718 | VID28   |
| 0.141200858 | 0.97156603  | 0.609220601 | -0.11224 | -0.01126 | -0.16684 | PDR17   |
| 0.141252424 | 0.128547958 | 0.680777882 | -0.23375 | 0.301916 | -0.30553 | RCH1    |
| 0.141252424 | 0.057147327 | 0.87592683  | 0.126716 | -0.1993  | 0.09318  | SKN7    |
| 0.141365419 | 4.14505E-37 | 2.04124E-07 | 0.14751  | 1.153803 | -1.09136 | CIN5    |
| 0.141365419 | 0.058548443 | 0.917776548 | -0.12573 | 0.195426 | 0.075093 | SHY1    |
| 0.14147613  | 0.034272578 | 0.661089241 | -0.11407 | 0.195311 | 0.155985 | MRPL13  |
| 0.141971456 | 0.295390559 | 1           | -2.06102 | -2.02358 | 2.678418 | YDR278C |
| 0.141971456 | 0.295390559 | 1           | -2.06101 | -2.02358 | 2.678392 | None    |
| 0.141971456 | 0.295390559 | 1           | -2.06101 | -2.02358 | 2.678361 | None    |
| 0.142144655 | 0.295461185 | 1           | -2.05706 | -2.01964 | 2.672745 | None    |
| 0.142226212 | 0.121199858 | 0.527985788 | -0.09555 | -0.12686 | -0.16184 | LYS9    |
| 0.142498651 | 0.006330535 | 0.507911475 | -0.12228 | 0.260656 | 0.213211 | RDL2    |
| 0.143506532 | 1           | 0.545418491 | 0.213818 | -0.00118 | -0.35308 | CSE2    |
| 0.143648787 | 0.295613321 | 0.836551898 | -0.13639 | 0.132302 | -0.11816 | MRM1    |
| 0.143949913 | 0.427585494 | 0.622714429 | -0.12788 | -0.09856 | 0.187361 | TCB1    |
| 0.144262898 | 0.051484274 | 0.971609311 | -0.19701 | -0.31771 | 0.082402 | ASG1    |
| 0.144315702 | 0.950105874 | 0.89987755  | 0.097357 | -0.01253 | 0.065332 | GPA1    |
| 0.144490112 | 0.753846794 | 0.003688652 | 0.142181 | 0.052889 | -0.69034 | ASI2    |
| 0.144603083 | 0.915294708 | 0.859769494 | 0.146345 | 0.02547  | 0.11697  | COG7    |
| 0.144616301 | 0.124190791 | 0.812322751 | 0.096135 | 0.127337 | 0.089767 | PDA1    |
| 0.144806266 | 0.854733623 | 0.120662207 | 0.118282 | -0.02985 | -0.35915 | RAM1    |
| 0.145720606 | 0.012654875 | 1           | 0.166225 | -0.33416 | 0.039546 | ARG81   |
| 0.146314989 | 0.492321556 | 0.702435074 | 0.130777 | -0.08986 | -0.16522 | CTI6    |
| 0.146746164 | 0.508142283 | 0.967394603 | -0.73657 | 0.475952 | -0.33314 | None    |

|              |              |                                                    |
|--------------|--------------|----------------------------------------------------|
| 0. 146978444 | 0. 737846426 | 1 0. 157501 -0. 06205 0. 024211 MRX1               |
| 0. 147038    | 0. 036516079 | 0. 287597168 0. 093344 0. 16071 0. 220605 PEP4     |
| 0. 147038    | 0. 607278799 | 0. 974692539 -0. 10389 -0. 05726 -0. 04194 NFU1    |
| 0. 147363886 | 0. 691399034 | 0. 997983923 -0. 431 0. 190859 0. 133902 HSP32     |
| 0. 147370204 | 0. 240168063 | 0. 771910654 -0. 08973 0. 096222 0. 094191 MDH3    |
| 0. 147861933 | 0. 802618659 | 0. 927963214 0. 137882 -0. 04311 -0. 07799 MED6    |
| 0. 148356189 | 0. 294183573 | 9. 09486E-05 -0. 14172 0. 139445 -0. 85919 IRC23   |
| 0. 148356189 | 0. 745058477 | 1 -0. 47277 -0. 1819 -0. 14415 YGR067C             |
| 0. 148437789 | 0. 133602113 | 0. 009452184 -0. 11975 0. 156255 0. 541187 RPS26A  |
| 0. 148654754 | 0. 455569382 | 0. 625394004 0. 166842 0. 123651 -0. 24559 MEF2    |
| 0. 148803096 | 0. 321761523 | 0. 906628341 -1. 75202 -1. 66248 -0. 20367 YIL177C |
| 0. 149240389 | 0. 379249077 | 0. 060744575 -0. 12767 -0. 10916 -0. 44582 IDS2    |
| 0. 149581483 | 0. 746430113 | 0. 980898839 -0. 12505 -0. 04822 0. 047191 INP53   |
| 0. 149626449 | 0. 198842787 | 0. 990208543 -0. 09799 -0. 11344 -0. 03325 TAF4    |
| 0. 150606632 | 0. 113344883 | 0. 903248727 0. 145098 -0. 20065 -0. 09732 PRP16   |
| 0. 150806792 | 0. 178180945 | 0. 767199943 0. 178201 -0. 2155 -0. 19185 YBR138C  |
| 0. 153566267 | 0. 008085082 | 0. 69956533 -0. 12716 0. 271014 0. 164371 MGR2     |
| 0. 153652773 | 0. 447017626 | 0. 263985261 0. 112699 0. 08545 0. 280722 RPS6A    |
| 0. 153652773 | 0. 43160484  | 0. 739091337 -0. 15644 0. 1219 -0. 18035 NTC20     |
| 0. 153935751 | 0. 682492975 | 0. 205928769 0. 185042 0. 085932 -0. 49982 GIP2    |
| 0. 153935751 | 0. 849224058 | 0. 790203342 -0. 13555 0. 035467 0. 137095 FAP7    |
| 0. 153935751 | 1            | 0. 937179795 -0. 5579 -0. 01635 -0. 30213 None     |
| 0. 15448157  | 0. 376938607 | 0. 933220016 -0. 12719 -0. 11031 -0. 06917 MGM1    |
| 0. 154614031 | 0. 658859261 | 0. 804181925 0. 133389 -0. 06627 0. 130055 SLM2    |
| 0. 154773324 | 0. 335205662 | 0. 971609311 -0. 20369 0. 189087 -0. 08754 HEL1    |
| 0. 155549456 | 0. 015999866 | 0. 13719416 0. 0952 -0. 18933 0. 28873 PUS7        |
| 0. 155549456 | 0. 865630153 | 1 0. 131742 0. 032207 0. 027381 MET12              |
| 0. 155880413 | 0. 113318165 | 0. 669483248 0. 130843 -0. 18284 0. 181885 NUP188  |
| 0. 156028513 | 0. 469895523 | 0. 509023813 -0. 24664 0. 179931 0. 441562 None    |
| 0. 156028513 | 0. 038719477 | 0. 901362207 -0. 17046 0. 295145 -0. 11584 ATG31   |
| 0. 156451566 | 0. 42227856  | 0. 498477715 -0. 15672 -0. 12524 -0. 28484 AFI1    |
| 0. 156451566 | 0. 162279302 | 0. 943076061 0. 258286 -0. 32678 0. 134156 NUT2    |
| 0. 156522705 | 0. 946592101 | 0. 053817845 -0. 1167 0. 015983 0. 425586 CWP2     |
| 0. 157138553 | 0. 002281388 | 0. 904680493 -0. 29288 0. 695829 -0. 19465 None    |
| 0. 157203636 | 0. 022294635 | 0. 739091337 0. 17141 -0. 32828 0. 200262 FUN30    |
| 0. 157657956 | 0. 763231981 | 0. 317527924 -0. 10866 0. 039779 0. 252955 PNP1    |
| 0. 157657956 | 0. 384327883 | 1 1. 897148 -1. 67735 -2. 61868 None               |
| 0. 157812734 | 0. 384327883 | 1 1. 894484 -1. 67503 -2. 61463 None               |
| 0. 158453395 | 0. 384508616 | 1 1. 890515 -1. 67125 -2. 60974 None               |
| 0. 158453395 | 0. 384508616 | 1 1. 890504 -1. 67124 -2. 60974 None               |
| 0. 158453395 | 0. 384508616 | 1 1. 890549 -1. 67129 -2. 60975 None               |
| 0. 158514028 | 0. 033709464 | 0. 587251805 0. 137446 -0. 24721 0. 221109 MAD1    |
| 0. 158514028 | 0. 384508616 | 1 1. 890807 -1. 67131 -2. 61089 None               |
| 0. 158514028 | 0. 384508616 | 1 1. 890844 -1. 67135 -2. 6109 None                |
| 0. 158514028 | 0. 384508616 | 1 1. 890854 -1. 67137 -2. 6109 YKR032W             |
| 0. 158514028 | 0. 384508616 | 1 1. 890866 -1. 67138 -2. 6109 None                |
| 0. 158563594 | 0. 508078874 | 0. 920656396 -0. 13149 -0. 08982 -0. 07957 RNH201  |
| 0. 158692031 | 0. 343957891 | 0. 98500242 0. 118333 -0. 10986 0. 043052 SMY2     |
| 0. 158697818 | 0. 580749101 | 0. 312126896 -0. 14718 0. 087711 -0. 34397 YBR241C |
| 0. 158768298 | 0. 398327474 | 0. 255041627 0. 098177 -0. 08241 0. 250838 NOP2    |
| 0. 158768298 | 0. 384834863 | 1 1. 888366 -1. 66895 -2. 60801 None               |
| 0. 158768298 | 0. 384834863 | 1 1. 888394 -1. 66898 -2. 60802 None               |
| 0. 158768298 | 0. 384834863 | 1 1. 88843 -1. 66903 -2. 60804 YOL019W-/           |
| 0. 159606769 | 0. 521345246 | 0. 786584362 -0. 78421 0. 506527 -0. 8443 None     |

|             |             |             |          |          |          |         |
|-------------|-------------|-------------|----------|----------|----------|---------|
| 0.159777515 | 0.922137802 | 1           | 1.234829 | 0.20881  | 0.252285 | None    |
| 0.160219704 | 0.533524502 | 1           | 0.164035 | -0.10732 | 0.039346 | PH087   |
| 0.160219704 | 0.625197222 | 1           | 0.879565 | 0.479345 | -0.13765 | None    |
| 0.160552268 | 1           | 0.744376434 | -0.11436 | 0.003602 | 0.132154 | EL02    |
| 0.160570212 | 0.928674902 | 0.979069474 | -0.1603  | -0.02618 | -0.0626  | TAP42   |
| 0.160941676 | 0.164539138 | 0.919926509 | 0.142208 | 0.179416 | 0.087822 | SRB6    |
| 0.160978149 | 0.161492284 | 0.976568193 | 0.229736 | 0.291773 | -0.09338 | None    |
| 0.161148028 | 0.839560652 | 0.913628943 | 0.110214 | -0.03076 | 0.070901 | URA6    |
| 0.16194722  | 0.279341459 | 0.08318439  | -0.19188 | -0.20032 | -0.64551 | IZH4    |
| 0.162917914 | 0.035135362 | 0.879698394 | -0.14543 | 0.259802 | 0.11025  | YKL069W |
| 0.162917914 | 0.662458676 | 0.93147427  | 0.131185 | -0.06576 | 0.073854 | PEX6    |
| 0.16307499  | 0.252510181 | 0.685438098 | -0.09151 | 0.099664 | 0.125098 | SCW4    |
| 0.163094747 | 0.203043786 | 0.675161254 | 0.173172 | 0.204858 | 0.240574 | YIL089W |
| 0.164022054 | 0.405829626 | 0.757681998 | -0.12985 | -0.10881 | -0.14644 | EPT1    |
| 0.164059742 | 0.948230011 | 0.903709617 | 0.245123 | -0.03388 | 0.168847 | YLR125W |
| 0.16452862  | 0.908330878 | 0.312126896 | -0.85323 | -0.15956 | -2.05927 | YOL024W |
| 0.165097016 | 1           | 0.143859218 | 0.132615 | -0.00048 | -0.40481 | GPB2    |
| 0.165946243 | 0.87456095  | 0.313124264 | -0.15454 | 0.037011 | -0.36794 | CTM1    |
| 0.16661475  | 0.806667431 | 0.737914729 | -0.18327 | 0.058374 | -0.21871 | HO      |
| 0.166657766 | 0.013123836 | 0.522217116 | -0.16513 | -0.34446 | -0.29711 | PHO4    |
| 0.167010479 | 0.839560652 | 0.49313497  | 0.117352 | 0.033156 | -0.22022 | CNE1    |
| 0.167107006 | 0.321935126 | 0.862693719 | 0.14137  | 0.138422 | -0.11695 | MCM21   |
| 0.167127978 | 0.936093775 | 0.927489937 | -0.12658 | -0.01968 | -0.07511 | EOS1    |
| 0.167523055 | 0.189929789 | 0.035404019 | 0.112599 | 0.1375   | 0.45434  | ELF1    |
| 0.167845864 | 0.575567686 | 0.466301517 | -0.17975 | 0.11015  | 0.352313 | DAD1    |
| 0.16869847  | 0.029341238 | 0.89043028  | 0.096838 | 0.181256 | -0.07072 | DCS1    |
| 0.16924132  | 0.887204289 | 0.778574825 | -0.07704 | -0.01721 | 0.083613 | PAB1    |
| 0.169644786 | 0.500248241 | 0.41940157  | -0.11604 | 0.082233 | 0.241377 | PFD1    |
| 0.169710099 | 0.761526771 | 0.800070771 | -0.12062 | 0.045647 | 0.122689 | BOS1    |
| 0.169786519 | 0.860071452 | 0.201505014 | -0.11939 | 0.030851 | -0.33548 | HOS4    |
| 0.169815465 | 0.237866407 | 0.093444318 | 0.931312 | 1.051827 | 3.346963 | None    |
| 0.170267339 | 0.761075278 | 0.980898839 | -0.11926 | 0.045309 | -0.04703 | CIA2    |
| 0.170286501 | 0.667488134 | 0.137694656 | 0.104744 | 0.052235 | 0.327508 | TMA20   |
| 0.170286501 | 0.054666041 | 0.998804008 | 0.279644 | -0.47554 | 0.091192 | RSC30   |
| 0.170596619 | 3.90144E-06 | 0.411752857 | -0.15896 | 0.54023  | 0.333826 | GPX1    |
| 0.170748534 | 0.440961232 | 0.522788552 | 1.143192 | 0.899617 | 2.191466 | None    |
| 0.170850484 | 0.87456095  | 0.853569585 | -0.09855 | 0.023863 | 0.084971 | APE2    |
| 0.171269438 | 0.181816644 | 1           | 0.11409  | -0.14292 | -0.01495 | NIS1    |
| 0.171614525 | 0.746350726 | 0.840006224 | 0.138374 | -0.05615 | -0.1258  | MHP1    |
| 0.17168991  | 0.663621022 | 0.358747602 | -0.9229  | -0.46103 | -2.45215 | None    |
| 0.172168122 | 0.482993634 | 0.903709617 | -0.19114 | 0.140883 | -0.1334  | HAP3    |
| 0.172173991 | 0.981817797 | 0.937363635 | -0.13316 | 0.012395 | -0.07332 | MCT1    |
| 0.172975963 | 0.734931499 | 0.358747602 | -1.66161 | -0.66197 | 3.946191 | None    |
| 0.172975963 | 0.251205476 | 0.648340079 | 1.046852 | 1.167885 | -1.63793 | YRF1-1  |
| 0.172975963 | 0.892236467 | 0.915545807 | 0.143159 | -0.03119 | 0.093367 | VAM6    |
| 0.172975963 | 1           | 1           | -1.89568 | 0.032549 | -0.04003 | None    |
| 0.172975963 | 1           | 1           | -1.89592 | 0.038849 | -0.04778 | None    |
| 0.172975963 | 1           | 1           | -1.89592 | 0.038843 | -0.04777 | None    |
| 0.173028575 | 0.802618659 | 0.733389979 | 0.137573 | 0.045394 | -0.16878 | VPH2    |
| 0.173712107 | 0.014466754 | 0.778620065 | 0.29355  | -0.62082 | -0.32311 | ATP10   |
| 0.174232243 | 0.504240033 | 0.888617774 | 0.124023 | -0.08847 | 0.093633 | NUP82   |
| 0.174300678 | 0.101825222 | 0.25613335  | -0.35957 | -0.53802 | 0.958295 | MIP6    |
| 0.174726266 | 0.281123697 | 0.889649609 | 0.117618 | -0.12621 | 0.087792 | KAR1    |
| 0.174887932 | 0.079277191 | 0.125375403 | 0.105834 | -0.16798 | 0.341462 | PMA1    |

|              |              |                                                      |
|--------------|--------------|------------------------------------------------------|
| 0. 174887932 | 0. 298926458 | 1 -0. 64874 0. 654631 -0. 03969 None                 |
| 0. 174928008 | 0. 034320207 | 0. 255041627 0. 133686 -0. 24816 0. 354334 KAP114    |
| 0. 174928008 | 1            | 0. 726622371 -0. 16984 0. 007859 0. 213088 HOS2      |
| 0. 1750056   | 0. 119341769 | 0. 32576519 -1. 17488 1. 641486 3. 07095 YOL013W-I   |
| 0. 175314834 | 0. 893776678 | 0. 28749674 0. 229609 -0. 04984 -0. 57431 RTA1       |
| 0. 175586028 | 0. 311884893 | 0. 08245863 0. 793667 -0. 83848 -3. 24344 OSW1       |
| 0. 175869347 | 0. 612169768 | 0. 961702496 -0. 11651 -0. 06772 0. 056874 ALG11     |
| 0. 175960004 | 0. 297901989 | 0. 98500242 0. 109203 -0. 11373 -0. 04175 CLN3       |
| 0. 176229814 | 0. 782040669 | 0. 897848413 -0. 14298 0. 050759 0. 103614 FUN14     |
| 0. 176290154 | 0. 291249532 | 0. 498094313 -0. 13641 0. 143329 0. 259496 LST7      |
| 0. 176654124 | 0. 145620859 | 1 0. 557416 0. 75608 -0. 13171 YIL054W               |
| 0. 176654124 | 0. 942225336 | 1 1. 444079 -0. 21152 -0. 37433 None                 |
| 0. 177117248 | 0. 763546663 | 0. 952970302 -0. 11459 -0. 04372 0. 058867 RPB3      |
| 0. 177234622 | 0. 153838133 | 0. 971609311 -0. 12123 0. 161409 0. 054554 MRPL16    |
| 0. 177410954 | 0. 922329251 | 0. 830189162 0. 954493 0. 169491 -0. 92027 None      |
| 0. 177831552 | 0. 146319766 | 0. 733341705 0. 118509 0. 160927 0. 1476 GRX7        |
| 0. 177831552 | 0. 488044682 | 0. 98500242 -0. 09694 -0. 07169 0. 036693 ARP9       |
| 0. 17789088  | 0. 009381038 | 0. 740020932 0. 184613 -0. 41518 0. 225736 RAD61     |
| 0. 179011152 | 0. 87456095  | 0. 69956533 -0. 17568 0. 043247 -0. 23942 CNN1       |
| 0. 17911209  | 0. 413258346 | 0. 573987041 0. 118746 0. 101294 -0. 20262 MGR3      |
| 0. 179217139 | 0. 304299791 | 0. 114649943 -0. 10654 0. 109685 0. 353076 RPL12A    |
| 0. 179629887 | 0. 026850024 | 0. 651381471 0. 109477 -0. 2135 0. 165743 VPH1       |
| 0. 179768123 | 1            | 1 0. 08425 -0. 00248 0. 000197 ZUO1                  |
| 0. 179871587 | 0. 55767454  | 0. 931141702 -0. 11262 0. 073525 -0. 06573 IRC21     |
| 0. 179871587 | 0. 446288659 | 1 -0. 26446 -0. 21285 0. 02152 YBR184W               |
| 0. 179960747 | 5. 14593E-07 | 0. 006151828 0. 1221 0. 455992 -0. 61033 HXT7        |
| 0. 179960747 | 0. 853463958 | 0. 868996053 0. 206501 -0. 05648 -0. 17065 VPS15     |
| 0. 180219478 | 0. 010883358 | 0. 927619939 0. 136669 -0. 30227 0. 083625 MSB2      |
| 0. 180514407 | 0. 210426761 | 0. 997983923 0. 113767 0. 137585 -0. 03813 CAB4      |
| 0. 181126929 | 0. 199639017 | 0. 269184303 -0. 16654 0. 204742 -0. 43319 APJ1      |
| 0. 181684979 | 0. 157263376 | 0. 054756353 -0. 10655 0. 142017 0. 40904 RPS9B      |
| 0. 181684979 | 0. 670717765 | 0. 808567391 -0. 20229 -0. 10243 0. 206229 MPP6      |
| 0. 181859746 | 0. 442222692 | 0. 983370642 -0. 59307 0. 474574 0. 230964 None      |
| 0. 182032911 | 0. 758146893 | 0. 676524689 0. 561568 0. 223945 -0. 8155 None       |
| 0. 182224176 | 0. 156953675 | 1 0. 357388 -0. 48735 0. 068084 None                 |
| 0. 182474891 | 1            | 0. 167222206 0. 191215 0. 010954 -0. 58546 CTF19     |
| 0. 182474891 | 0. 014428866 | 0. 253365907 -0. 08916 0. 189043 -0. 23895 MIA40     |
| 0. 182764773 | 0. 396462129 | 0. 360540001 1. 165595 -1. 08537 -3. 12064 YLR154C-C |
| 0. 182954444 | 0. 682492975 | 0. 900882736 -0. 11262 -0. 05558 0. 08171 YNL217W    |
| 0. 183089648 | 0. 513831581 | 0. 281242785 -0. 11393 -0. 08123 0. 294888 RRN11     |
| 0. 183415686 | 0. 146749371 | 1 0. 147656 -0. 20365 0. 00691 BUD6                  |
| 0. 183510813 | 0. 076368853 | 0. 924605282 -0. 17299 0. 279502 0. 108505 YPL071C   |
| 0. 183612304 | 0. 820475284 | 1 -0. 57193 0. 179064 0. 116621 None                 |
| 0. 18391766  | 0. 038862304 | 0. 463829525 0. 11071 -0. 20544 0. 225974 BUD27      |
| 0. 183987799 | 0. 0108701   | 1 1. 518231 3. 803004 1. 697432 CUP1-1               |
| 0. 184387642 | 1            | 0. 672010939 0. 142077 0. 006239 0. 208515 CST9      |
| 0. 186060092 | 0. 854733623 | 1 -0. 41528 0. 113195 -0. 12006 None                 |
| 0. 186351836 | 0. 76984172  | 0. 586189737 -0. 23106 -0. 08752 0. 394024 NEL1      |
| 0. 186374956 | 0. 98685381  | 0. 73632566 -0. 94286 -0. 07782 -1. 22292 YBL071C-I  |
| 0. 187333785 | 0. 152505754 | 0. 651238461 -1. 38278 1. 836246 1. 688898 PAU20     |
| 0. 187348047 | 0. 74444644  | 0. 967394603 -0. 09634 0. 040462 0. 045771 WSC2      |
| 0. 187693091 | 0. 71619322  | 0. 789517744 0. 971823 -0. 44985 1. 087042 None      |
| 0. 188622546 | 0. 261791204 | 0. 477818318 0. 310982 -0. 35605 -0. 62383 YML037C   |
| 0. 188767354 | 0. 130559389 | 0. 927131674 -0. 16406 0. 23424 -0. 10227 YPL229W    |

|              |              |              |           |           |           |           |
|--------------|--------------|--------------|-----------|-----------|-----------|-----------|
| 0. 189145688 | 0. 93221185  | 0. 241562819 | -0. 09798 | -0. 01656 | 0. 271805 | RCM1      |
| 0. 189204231 | 0. 971085707 | 0. 000924389 | 0. 168815 | 0. 019023 | -0. 97891 | MET2      |
| 0. 189204231 | 0. 773803168 | 0. 845726915 | -0. 30422 | 0. 113985 | -0. 28077 | MDJ2      |
| 0. 189408369 | 1            | 0. 739091337 | -0. 22455 | 0. 001354 | -0. 2795  | YEL023C   |
| 0. 189829819 | 0. 613678519 | 1            | 0. 162532 | -0. 09708 | -0. 01102 | TOF1      |
| 0. 189929033 | 0. 995214622 | 0. 681411478 | -1. 61089 | 0. 109295 | -2. 38294 | None      |
| 0. 190210253 | 0. 914594311 | 0. 976568193 | 0. 970733 | -0. 18968 | -0. 42027 | None      |
| 0. 190782975 | 0. 126912899 | 0. 944544569 | -0. 16134 | -0. 23456 | 0. 089198 | SKN1      |
| 0. 190872635 | 0. 304258036 | 0. 005956703 | -0. 76953 | -0. 82306 | 4. 42991  | YIR021W-1 |
| 0. 191187285 | 1            | 0. 071166723 | 0. 141003 | -0. 00792 | -0. 52283 | GIC1      |
| 0. 191187285 | 0. 911433046 | 0. 63834146  | -0. 13707 | -0. 02716 | -0. 21596 | PCL2      |
| 0. 191432285 | 4. 62271E-06 | 0. 060036243 | -0. 16259 | 0. 573292 | -0. 61685 | EDC2      |
| 0. 191432285 | 0. 515859901 | 0. 39206293  | 0. 170268 | -0. 12343 | -0. 38473 | ISR1      |
| 0. 191525031 | 0. 151541511 | 0. 661818179 | 0. 140537 | 0. 194292 | -0. 21325 | MRX6      |
| 0. 191802399 | 0. 572909069 | 0. 651238461 | 0. 094925 | -0. 06177 | 0. 147385 | GET1      |
| 0. 192003247 | 0. 903977193 | 0. 848611069 | 0. 558812 | 0. 117918 | -0. 51167 | None      |
| 0. 192171288 | 0. 199326299 | 0. 400503761 | -0. 21334 | 0. 268348 | -0. 47504 | MOH1      |
| 0. 192850511 | 0. 613301749 | 0. 808567391 | -0. 14222 | 0. 08516  | -0. 14805 | MUD1      |
| 0. 192850511 | 0. 440243906 | 1            | 1. 012344 | -0. 87932 | -0. 06612 | None      |
| 0. 192856478 | 0. 515509269 | 0. 5048946   | -0. 18749 | 0. 135346 | -0. 36561 | DAL7      |
| 0. 193608428 | 0. 405088718 | 0. 202387133 | -0. 95536 | -0. 85561 | -4. 10463 | None      |
| 0. 195592398 | 0. 895413787 | 0. 276489336 | -0. 22537 | 0. 050065 | -0. 59997 | TOG1      |
| 0. 195592398 | 0. 368823237 | 0. 454257899 | -0. 10569 | 0. 10121  | 0. 222288 | YIR035C   |
| 0. 1956685   | 0. 611875648 | 0. 845920712 | -0. 13501 | -0. 08178 | -0. 1264  | HDA1      |
| 0. 195934498 | 0. 031947208 | 0. 960632458 | -0. 08407 | -0. 16437 | 0. 04326  | SRP72     |
| 0. 196127936 | 0. 066428344 | 0. 7225564   | 0. 11539  | -0. 19801 | -0. 15236 | BDF1      |
| 0. 196127936 | 0. 069544572 | 1            | 0. 101212 | -0. 17202 | -0. 01576 | STE12     |
| 0. 196664198 | 0. 379859709 | 0. 855640301 | -0. 96979 | 0. 880181 | 0. 861466 | None      |
| 0. 196750691 | 0. 693401532 | 0. 340299676 | -0. 27736 | -0. 13657 | -0. 68691 | SP016     |
| 0. 196941766 | 0. 011612022 | 0. 420929331 | -0. 10792 | 0. 243012 | 0. 237191 | ACP1      |
| 0. 197866653 | 0. 382143759 | 0. 006383153 | 0. 1041   | -0. 09818 | -0. 53984 | ALD5      |
| 0. 198101585 | 0. 059305878 | 0. 992218183 | 0. 094119 | -0. 1658  | -0. 03486 | ALG2      |
| 0. 198261579 | 0. 483153849 | 0. 965798756 | -0. 1183  | -0. 09221 | -0. 05862 | RFC4      |
| 0. 198268215 | 0. 087597502 | 0. 76367822  | 0. 243491 | 0. 394337 | 0. 291394 | YER137C   |
| 0. 198581813 | 0. 94982823  | 0. 977896479 | -0. 10624 | 0. 015449 | 0. 045869 | TCD2      |
| 0. 19858726  | 0. 505136536 | 0. 446640364 | -0. 0979  | -0. 07303 | 0. 209258 | TSA1      |
| 0. 198720179 | 0. 715720978 | 0. 379660556 | -0. 08676 | -0. 04058 | 0. 20242  | TED1      |
| 0. 198720179 | 0. 196081443 | 0. 828048662 | 0. 285364 | -0. 37124 | 0. 28766  | PPM2      |
| 0. 199138318 | 0. 157263376 | 0. 600468279 | 0. 200994 | 0. 278315 | -0. 34221 | PPT2      |
| 0. 199285032 | 0. 292656551 | 0. 909621954 | -0. 37511 | -0. 41614 | 0. 272284 | YLR358C   |
| 0. 199677826 | 0. 099555926 | 0. 868031723 | -0. 17199 | 0. 269573 | -0. 14884 | YDR090C   |
| 0. 199737764 | 0. 615223063 | 0. 960372867 | 0. 090827 | -0. 05493 | 0. 047302 | PFF1      |
| 0. 199782566 | 0. 002099596 | 0. 146124605 | -0. 18896 | 0. 497962 | -0. 61196 | CUR1      |
| 0. 200783908 | 0. 171300695 | 0. 765014016 | 0. 169798 | -0. 23076 | -0. 20333 | SGF29     |
| 0. 201552066 | 0. 759529423 | 1            | 0. 119048 | 0. 048957 | 0. 016564 | APC2      |
| 0. 201935736 | 0. 157469667 | 0. 046235167 | -0. 10099 | 0. 140173 | 0. 417451 | RPS21A    |
| 0. 202874654 | 0. 428998997 | 1            | 0. 135143 | 0. 117672 | -0. 04358 | NHA1      |
| 0. 202874654 | 0. 99746658  | 1            | -0. 09113 | -0. 00628 | 0. 021754 | YFR006W   |
| 0. 20303601  | 0. 584594986 | 0. 780254446 | -0. 08132 | 0. 052711 | 0. 094292 | KTR1      |
| 0. 203140428 | 0. 843062252 | 1            | -0. 11089 | -0. 03301 | -0. 00876 | PAN5      |
| 0. 203305793 | 0. 947727435 | 0. 966082547 | -1. 21017 | 0. 171816 | -0. 64907 | None      |
| 0. 203459034 | 0. 239652304 | 0. 926181253 | -0. 12818 | -0. 15516 | 0. 082929 | RPM2      |
| 0. 203512955 | 0. 44410329  | 0. 735885155 | -0. 11141 | 0. 094185 | -0. 14434 | SRF1      |
| 0. 203954408 | 0. 114362042 | 1            | 0. 141146 | -0. 21787 | 0. 022826 | PSK2      |

|              |              |              |             |           |           |                      |
|--------------|--------------|--------------|-------------|-----------|-----------|----------------------|
| 0. 204959679 | 0. 690335313 | 0. 744376434 | 0. 785403   | 0. 395741 | -1. 00329 | None                 |
| 0. 205437174 | 0. 142943596 | 0. 908010779 | 0. 17246    | -0. 2508  | 0. 125334 | HIR3                 |
| 0. 205437174 | 0. 196724669 | 0. 971609311 | -0. 18757   | 0. 243597 | 0. 089046 | DLT1                 |
| 0. 206289046 | 0. 182884497 |              | 1           | -0. 15303 | 0. 2041   | 0. 035741 UBP11      |
| 0. 206477486 | 1            | 0. 848379499 | -0. 95952   | -0. 04736 | 0. 923785 | YBR200W-/-           |
| 0. 206756382 | 0. 003986337 | 0. 536035164 | 0. 089855   | -0. 23041 | 0. 172631 | RRP6                 |
| 0. 207955606 | 0. 112919922 | 0. 750952753 | 0. 122026   | -0. 19021 | 0. 153213 | POM152               |
| 0. 208090983 | 0. 605408587 | 0. 074638157 | 1. 367597   | -0. 88037 | -6. 75373 | YGL138C              |
| 0. 208158114 | 0. 360876565 |              | 0. 08251531 | -0. 1331  | 0. 132394 | -0. 49598 AME1       |
| 0. 208158114 | 0. 003395103 | 0. 915496392 | -0. 15648   | 0. 404065 | 0. 109326 | MZM1                 |
| 0. 208574357 | 0. 709302791 | 0. 156558309 | -0. 86583   | 0. 406399 | -3. 28996 | None                 |
| 0. 208574357 | 0. 794730765 | 0. 903248727 | -0. 11133   | -0. 04062 | -0. 08401 | MOD5                 |
| 0. 20883049  | 0. 041913401 | 0. 902712809 | -0. 19872   | 0. 377357 | -0. 14991 | ATG14                |
| 0. 209350002 | 0. 901896821 | 0. 961702496 | -0. 49237   | 0. 106607 | -0. 25995 | YHR139C-/-           |
| 0. 209645973 | 0. 440683477 | 0. 794898864 | 0. 08805    | 0. 076082 | 0. 099263 | ADH1                 |
| 0. 210427594 | 0. 279903897 |              | 1           | 0. 122573 | -0. 1416  | 0. 01568 MAG2        |
| 0. 211024985 | 0. 096928954 | 0. 721655021 | -0. 08875   | 0. 143565 | 0. 12099  | YTA12                |
| 0. 211143874 | 0. 288468769 |              | 1           | -0. 14792 | 0. 167614 | 0. 044201 YOR015W    |
| 0. 21138804  | 0. 184636081 | 0. 748466881 | 0. 090579   | -0. 12245 | 0. 115201 | HEL2                 |
| 0. 211475428 | 0. 737846426 | 0. 023505165 | 0. 091057   | -0. 041   | -0. 42258 | OPT2                 |
| 0. 211744758 | 0. 019381107 | 0. 333158461 | -0. 11506   | -0. 25046 | 0. 292422 | DIP2                 |
| 0. 212069075 | 0. 206000284 |              | 0. 93741782 | 0. 336048 | 0. 436788 | 0. 200539 YOR376W-/- |
| 0. 212189292 | 0. 610223632 | 0. 706225178 | 0. 442315   | -0. 28215 | -0. 64936 | None                 |
| 0. 212330005 | 0. 293219896 |              | 1           | -0. 12474 | -0. 14103 | -0. 01827 SEA4       |
| 0. 213465774 | 0. 615223063 | 0. 336989777 | 0. 161845   | 0. 100525 | -0. 40951 | IPK1                 |
| 0. 213499159 | 0. 812133286 | 0. 634965185 | -0. 26063   | 0. 089979 | 0. 433499 | None                 |
| 0. 213796223 | 0. 319484149 |              | 1           | 0. 156305 | -0. 1697  | 0. 005446 ZDS2       |
| 0. 213924645 | 0. 122035336 | 0. 731592804 | 0. 092851   | -0. 14323 | 0. 124812 | GCD6                 |
| 0. 213924645 | 0. 039547582 |              | 1           | 0. 186809 | -0. 36772 | 0. 019951 RC01       |
| 0. 214088123 | 0. 013695435 | 0. 916400787 | -0. 10231   | -0. 23363 | -0. 07204 | SMI1                 |
| 0. 214094234 | 0. 427585494 |              | 1           | 0. 122976 | -0. 11027 | -0. 04291 HRQ1       |
| 0. 214788241 | 0. 063687056 | 0. 437337853 | 0. 103074   | -0. 18511 | -0. 23064 | TGL5                 |
| 0. 2149707   | 0. 281404598 |              | 1           | -1. 70926 | 1. 939872 | -2. 71352 None       |
| 0. 215167583 | 0. 098514402 | 0. 146638609 | -0. 09168   | -0. 1494  | 0. 309793 | NOP9                 |
| 0. 21537152  | 0. 281429987 |              | 1           | -1. 70798 | 1. 938817 | -2. 71318 None       |
| 0. 21537152  | 0. 281429987 |              | 1           | -1. 70818 | 1. 938995 | -2. 71328 None       |
| 0. 21537152  | 0. 281429987 |              | 1           | -1. 70823 | 1. 939035 | -2. 71329 PAU1       |
| 0. 21537152  | 0. 281429987 |              | 1           | -1. 70802 | 1. 938852 | -2. 71319 None       |
| 0. 21537152  | 0. 281429987 |              | 1           | -1. 70806 | 1. 938881 | -2. 7132 None        |
| 0. 215558573 | 0. 630124855 |              | 0. 7990478  | 0. 350221 | -0. 21319 | 0. 394461 YMR001C-/- |
| 0. 21562352  | 0. 914594311 | 0. 889649609 | -0. 09792   | -0. 01983 | -0. 07919 | ILV1                 |
| 0. 21568593  | 0. 546699631 | 0. 643913419 | -0. 14102   | 0. 100696 | -0. 23166 | RKM5                 |
| 0. 2157726   | 0. 030604    | 0. 073409423 | 0. 092027   | -0. 189   | 0. 358189 | ESF1                 |
| 0. 21614971  | 0. 373168526 | 0. 976378097 | 0. 111647   | -0. 11126 | -0. 05126 | PMT3                 |
| 0. 216172014 | 0. 464360003 | 0. 069188274 | -0. 08624   | 0. 072183 | 0. 338629 | RPL6B                |
| 0. 216293915 | 0. 936226276 | 0. 919926509 | -0. 13669   | -0. 02339 | -0. 09435 | IPA1                 |
| 0. 216666113 | 0. 527520896 | 0. 629698062 | 0. 124594   | -0. 09276 | -0. 2102  | UBA4                 |
| 0. 216924307 | 0. 871135401 | 0. 505654891 | 0. 426946   | 0. 115888 | 0. 873657 | None                 |
| 0. 217622285 | 0. 886323024 | 0. 622714429 | 0. 177481   | 0. 044169 | 0. 303997 | None                 |
| 0. 218745502 | 0. 629248171 | 0. 237069015 | 0. 162056   | -0. 09875 | -0. 47908 | RGT2                 |
| 0. 218745502 | 0. 308388389 | 0. 915942439 | 0. 138836   | 0. 154402 | 0. 099093 | YIP4                 |
| 0. 219268606 | 0. 038508481 | 0. 661818179 | 0. 11277    | 0. 223873 | 0. 181193 | ISA2                 |
| 0. 219393989 | 0. 877594103 | 0. 977469861 | 0. 102759   | 0. 027223 | 0. 046503 | TIM44                |
| 0. 219463576 | 0. 322600041 | 0. 222510153 | 0. 109733   | -0. 11972 | -0. 33254 | PDS1                 |

|              |              |              |             |           |           |                   |
|--------------|--------------|--------------|-------------|-----------|-----------|-------------------|
| 0. 219560298 | 0. 156431496 | 0. 888371569 | -0. 17451   | 0. 251568 | 0. 144191 | MVB12             |
| 0. 219574486 | 0. 641082995 | 0. 712223429 | 0. 087194   | 0. 051545 | -0. 12487 | CUE5              |
| 0. 220243608 | 0. 632634392 |              | 1           | 0. 345596 | 0. 209047 | -0. 11349 DMC1    |
| 0. 220337053 | 0. 314829341 | 0. 077306681 | -0. 15024   | -0. 16582 | -0. 57649 | SAM3              |
| 0. 220682273 | 1            |              | 1           | 0. 122426 | 0. 002707 | 0. 026819 PRP45   |
| 0. 221083581 | 0. 858867801 | 0. 817868751 | 0. 122098   | -0. 03545 | -0. 13155 | APM1              |
| 0. 222072381 | 0. 422272348 | 0. 029665642 | 0. 086172   | 0. 078858 | 0. 397963 | RPS26B            |
| 0. 222339983 | 0. 379249077 |              | 0. 2432512  | -0. 09326 | 0. 092511 | 0. 275881 URA5    |
| 0. 223177113 | 0. 539290348 | 0. 246071819 | -0. 09321   | 0. 068421 | 0. 274525 | KTR7              |
| 0. 223177113 | 0. 436135587 | 0. 553808105 | -1. 08381   | -0. 97512 | 2. 304057 | HXT14             |
| 0. 223606944 | 0. 997790364 | 0. 921286576 | -0. 4803    | -0. 03372 | -0. 33115 | YER175W- <i>l</i> |
| 0. 22503297  | 0. 347850933 | 0. 738191837 | -0. 11465   | 0. 120311 | 0. 153799 | TOA2              |
| 0. 225101841 | 0. 460638341 | 0. 373560685 | -0. 11141   | 0. 095461 | 0. 275944 | SBH1              |
| 0. 225271916 | 0. 767694173 | 0. 915496392 | -0. 11585   | 0. 047758 | 0. 08396  | PRP9              |
| 0. 226439876 | 0. 483066965 |              | 1           | 0. 097631 | 0. 080523 | 0. 025867 CYM1    |
| 0. 22726795  | 0. 999497264 | 0. 451184565 | 0. 48106    | 0. 032698 | -1. 08468 | YJL077W- <i>I</i> |
| 0. 227282448 | 0. 953675948 |              | 0. 87973401 | 0. 652819 | -0. 09712 | -0. 57406 ME01    |
| 0. 227379895 | 0. 874643786 | 0. 241434728 | 0. 075902   | 0. 020609 | 0. 227627 | RPL3              |
| 0. 227482422 | 0. 998303878 | 0. 949031652 | -0. 12441   | -0. 00875 | 0. 072257 | STE14             |
| 0. 227852486 | 0. 427560059 | 0. 545272974 | 0. 072995   | 0. 067029 | 0. 144043 | TOM40             |
| 0. 228336944 | 0. 999282889 |              | 1           | -0. 10208 | 0. 007033 | 0. 007892 BUD17   |
| 0. 228458493 | 0. 344852441 | 0. 570229598 | -0. 77054   | -0. 82919 | 1. 541829 | None              |
| 0. 22892807  | 0. 554757324 | 0. 444392343 | 0. 102198   | 0. 074031 | 0. 232996 | MPC2              |
| 0. 229004785 | 0. 971085707 | 0. 904680493 | -0. 1041    | 0. 012666 | -0. 08034 | PTC2              |
| 0. 229004785 | 0. 735101186 |              | 1           | 0. 09879  | -0. 04645 | -0. 02991 RNH70   |
| 0. 229239719 | 0. 735873521 | 0. 911946622 | 0. 112148   | -0. 05264 | 0. 083656 | EDE1              |
| 0. 229760421 | 0. 674015722 | 0. 903248727 | 0. 114813   | -0. 06372 | 0. 090524 | UBP8              |
| 0. 229760421 | 0. 958254142 |              | 1           | -0. 1592  | 0. 02242  | -0. 03286 POL4    |
| 0. 230214192 | 0. 545862186 | 0. 764962215 | -0. 46208   | 0. 336961 | -0. 58286 | YML054C- <i>l</i> |
| 0. 230316062 | 0. 954188947 | 0. 846846052 | -0. 13216   | 0. 019446 | 0. 131882 | PET127            |
| 0. 23062417  | 0. 756256683 |              | 0. 19677862 | -1. 0548  | -0. 4539  | -4. 46612 YJL007C |
| 0. 231028675 | 0. 059378831 | 0. 950592115 | 0. 130992   | 0. 244902 | -0. 07597 | MCP1              |
| 0. 231261928 | 0. 434577301 |              | 0. 11348234 | 0. 089616 | 0. 081734 | 0. 330849 TIF11   |
| 0. 232138765 | 0. 011960104 | 0. 206936896 | 0. 235548   | 0. 566525 | -0. 74606 | GAS4              |
| 0. 232816844 | 0. 472617197 | 0. 976568193 | -0. 11935   | -0. 10179 | 0. 056026 | TPH3              |
| 0. 233348221 | 0. 368093975 |              | 0. 86530488 | 0. 0863   | -0. 08952 | 0. 08089 RPO21    |
| 0. 234759384 | 0. 311879301 | 0. 071166723 | 0. 097648   | 0. 111177 | 0. 395932 | RPL9A             |
| 0. 235195956 | 0. 051068941 | 0. 475256698 | 0. 113743   | -0. 22227 | -0. 25174 | CFT1              |
| 0. 235871352 | 0. 628871924 |              | 0. 74594446 | -0. 31411 | -0. 19742 | -0. 42814 None    |
| 0. 236771955 | 1            |              | 1           | 0. 114901 | -0. 00285 | -0. 03966 IVY1    |
| 0. 236997653 | 0. 860955797 |              | 0. 79509418 | -0. 13412 | 0. 039403 | 0. 159006 AST1    |
| 0. 237002975 | 0. 813026602 | 0. 448042463 | 0. 115538   | -0. 04181 | -0. 26544 | PSF2              |
| 0. 237002975 | 0. 296770677 | 0. 737036218 | 0. 146908   | 0. 172414 | 0. 20325  | VMA4              |
| 0. 237160876 | 0. 305237145 |              | 0. 16004587 | -0. 09212 | 0. 106182 | 0. 318451 RPS3    |
| 0. 237160876 | 0. 413242794 | 0. 931568877 | 0. 208198   | -0. 20032 | -0. 1357  | YHR177W           |
| 0. 237160876 | 0. 231636316 |              | 1           | -0. 09088 | -0. 11887 | -0. 02624 GCR2    |
| 0. 237498871 | 0. 672129195 | 0. 550781538 | -0. 19905   | 0. 111952 | 0. 395694 | VMA9              |
| 0. 237498871 | 0. 110173764 |              | 1           | -0. 13116 | -0. 21735 | -0. 00996 RAP1    |
| 0. 237573352 | 0. 071099424 | 0. 920147193 | -0. 10987   | 0. 200405 | -0. 07813 | RCR2              |
| 0. 238648058 | 0. 199496245 |              | 1           | 0. 215065 | 0. 297592 | 0. 002106 None    |
| 0. 238802326 | 0. 340221835 | 0. 897848413 | -0. 08337   | -0. 09144 | 0. 068543 | TAF6              |
| 0. 240234137 | 0. 660417863 | 0. 500377034 | 1. 313321   | 0. 75619  | -2. 68059 | TAR1              |
| 0. 240543399 | 0. 84140879  |              | 0. 13328662 | 0. 07425  | 0. 024054 | 0. 269262 RPS0B   |
| 0. 240543399 | 0. 008129962 | 0. 681411478 | -0. 0985    | 0. 250467 | 0. 157871 | GCY1              |



|              |              |              |           |           |           |           |
|--------------|--------------|--------------|-----------|-----------|-----------|-----------|
| 0. 242006423 | 0. 283359769 | 0. 628284624 | -0. 13793 | -0. 16796 | -0. 24464 | IRC3      |
| 0. 242115682 | 1            | 0. 832278865 | -0. 19633 | 0. 007288 | 0. 211178 | BIO4      |
| 0. 2423147   | 0. 551390968 | 0. 795907717 | -0. 23436 | 0. 174008 | 0. 278462 | YDR246W-1 |
| 0. 24274964  | 0. 582791209 | 0. 356832107 | -0. 08986 | 0. 063101 | 0. 235427 | YNR021W   |
| 0. 243219161 | 0. 020478658 | 0. 457306305 | 0. 106236 | -0. 24447 | 0. 245136 | MET18     |
| 0. 243556489 | 0. 632899025 | 0. 068857176 | -0. 15053 | 0. 094589 | -0. 61646 | PTK1      |
| 0. 244079902 | 0. 98408428  | 0. 975062924 | -0. 78143 | -0. 0798  | -0. 39309 | None      |
| 0. 244507972 | 0. 131282664 | 0. 40705101  | -0. 07608 | -0. 12154 | 0. 186872 | MAP1      |
| 0. 244609044 | 0. 483066965 | 0. 996250082 | -0. 23965 | 0. 203396 | -0. 09229 | RPL22A    |
| 0. 245563631 | 0. 295649423 | 0. 940701984 | 0. 153812 | 0. 184051 | -0. 09615 | CBT1      |
| 0. 245563631 | 0. 576193096 | 1            | 0. 158903 | 0. 113975 | 0. 005973 | YNL108C   |
| 0. 245639235 | 1            | 0. 851745398 | -0. 51952 | 0. 009289 | -0. 52198 | None      |
| 0. 245639235 | 1            | 1            | -0. 13262 | 0. 005288 | 0. 000297 | FMP25     |
| 0. 245818816 | 0. 782040669 | 0. 568396701 | -0. 13232 | -0. 05398 | -0. 2596  | PBP2      |
| 0. 245818816 | 0. 97067567  | 0. 929303164 | 0. 096597 | -0. 01227 | -0. 06586 | AHC1      |
| 0. 245830781 | 0. 059509508 | 0. 293969078 | 0. 874113 | -1. 90491 | 3. 27465  | None      |
| 0. 245830781 | 0. 748016729 | 0. 98500242  | -0. 15603 | 0. 072631 | -0. 06776 | ETP1      |
| 0. 245945477 | 0. 080547625 | 0. 040274266 | -0. 07387 | 0. 133492 | 0. 342335 | PDC1      |
| 0. 245945477 | 0. 19339556  | 0. 261118505 | 0. 193063 | -0. 27605 | -0. 57961 | VAM7      |
| 0. 245945477 | 0. 374974245 | 0. 978193638 | 0. 166933 | 0. 174875 | 0. 078665 | SHG1      |
| 0. 246664834 | 0. 062193215 | 0. 889649609 | 0. 157333 | -0. 30232 | 0. 135698 | SMC3      |
| 0. 246991131 | 0. 614870993 | 1            | 0. 140597 | 0. 093261 | 0. 048098 | NKP1      |
| 0. 247130687 | 0. 220345944 | 0. 617460449 | -0. 16188 | -0. 22021 | -0. 295   | APC4      |
| 0. 247340297 | 0. 896286063 | 0. 735602795 | 0. 117936 | 0. 028902 | 0. 167004 | PFA4      |
| 0. 248057405 | 0. 657516625 | 0. 166524458 | -0. 56514 | 0. 332493 | -2. 09055 | YBR027C   |
| 0. 24830257  | 0. 947727435 | 0. 868996053 | -1. 06093 | -0. 16918 | 1. 032659 | YJR128W   |
| 0. 24874122  | 0. 290286754 | 0. 046985988 | 0. 089964 | 0. 10952  | 0. 406211 | TMA19     |
| 0. 248845249 | 0. 438716189 | 0. 741079602 | -0. 73817 | 0. 672584 | 1. 025643 | None      |
| 0. 249636655 | 0. 763573287 | 0. 966082547 | -0. 12029 | -0. 05289 | -0. 06566 | IZH2      |
| 0. 249719239 | 0. 752538044 | 0. 467201862 | -0. 08451 | -0. 03924 | -0. 19439 | CEG1      |
| 0. 24993769  | 0. 058914883 | 0. 306543708 | -0. 25994 | 0. 500596 | -0. 72845 | AAC1      |
| 0. 249948378 | 0. 576420472 | 0. 863509016 | -0. 40167 | 0. 287249 | 0. 388594 | None      |
| 0. 250812357 | 0. 457843853 | 0. 924605282 | 0. 266821 | 0. 242111 | 0. 191557 | JLP1      |
| 0. 250812357 | 0. 472617197 | 0. 924605282 | -0. 10662 | 0. 093828 | -0. 07614 | PHO85     |
| 0. 250812357 | 0. 518133314 | 1            | -0. 56778 | -0. 45783 | 0. 16199  | None      |
| 0. 250858673 | 0. 512975922 | 0. 592985751 | 0. 102416 | -0. 08375 | -0. 19575 | YJR084W   |
| 0. 250890789 | 0. 164090726 | 0. 971609311 | 0. 127113 | -0. 19324 | -0. 06632 | URN1      |
| 0. 250890789 | 0. 049368202 | 1            | 0. 126664 | -0. 25722 | -0. 03493 | TSC11     |
| 0. 251271183 | 0. 915426343 | 0. 969243029 | 0. 080983 | 0. 01747  | -0. 04306 | CDC55     |
| 0. 25149101  | 0. 846838197 | 0. 710774648 | 0. 126244 | -0. 04078 | -0. 19387 | COG5      |
| 0. 25171745  | 0. 384327883 | 0. 385959394 | -0. 11284 | 0. 117045 | -0. 28781 | AIM46     |
| 0. 252243273 | 0. 619870553 | 0. 042435201 | -0. 09394 | -0. 06218 | -0. 43356 | DMA2      |
| 0. 252277448 | 0. 54489641  | 0. 385959394 | 0. 082681 | 0. 063682 | 0. 212057 | SEC65     |
| 0. 253972848 | 0. 422246873 | 0. 846605423 | 0. 10896  | -0. 10622 | -0. 11401 | BRE5      |
| 0. 254188049 | 0. 430199039 | 0. 77583136  | 0. 117832 | 0. 113114 | 0. 152407 | MET31     |
| 0. 254868426 | 0. 533349611 | 0. 985958815 | 0. 083591 | 0. 066025 | 0. 0363   | KGD1      |
| 0. 255370101 | 0. 504911953 | 0. 185716843 | -0. 1179  | 0. 098079 | 0. 403802 | MRPS16    |
| 0. 255370101 | 0. 027517618 | 0. 851392759 | -0. 15746 | 0. 351629 | 0. 161163 | ECI1      |
| 0. 257635878 | 0. 311249398 | 0. 971609311 | -0. 10552 | -0. 12573 | -0. 05568 | YDR248C   |
| 0. 257702883 | 0. 498295015 | 0. 400503761 | -0. 07443 | 0. 06305  | 0. 189194 | SEC62     |
| 0. 257732931 | 0. 398376237 | 0. 872290708 | -0. 11334 | 0. 115327 | -0. 10695 | CCP1      |
| 0. 257797539 | 0. 340284679 | 0. 371124917 | -0. 08735 | -0. 09924 | 0. 231462 | ESF2      |
| 0. 257818219 | 0. 828087918 | 0. 856715553 | -0. 07174 | -0. 0255  | 0. 072715 | TRR1      |
| 0. 25792259  | 0. 440961232 | 0. 921286576 | 0. 10006  | 0. 094712 | -0. 07355 | SPC3      |

|              |              |              |           |           |           |                   |
|--------------|--------------|--------------|-----------|-----------|-----------|-------------------|
| 0. 257940154 | 0. 149345776 | 0. 69956533  | -0. 12604 | 0. 198337 | -0. 20053 | PPG1              |
| 0. 257942781 | 0. 001335908 | 0. 184032149 | -0. 08777 | 0. 267796 | 0. 302727 | MIC26             |
| 0. 258616939 | 0. 222579714 | 0. 371371969 | 0. 119843 | -0. 16631 | -0. 31702 | AAC3              |
| 0. 259145491 | 0. 008311419 | 0. 030205993 | 0. 106257 | -0. 28146 | -0. 52003 | ADE17             |
| 0. 259756712 | 0. 397361658 | 1            | 1. 498496 | 1. 538385 | 2. 320844 | None              |
| 0. 259756712 | 0. 397361658 | 1            | 1. 49851  | 1. 538401 | 2. 320809 | YLR162W           |
| 0. 259756712 | 0. 397361658 | 1            | 1. 498518 | 1. 538409 | 2. 320792 | None              |
| 0. 259756712 | 0. 397361658 | 1            | 1. 498512 | 1. 538403 | 2. 320805 | None              |
| 0. 25984167  | 0. 782040669 | 0. 755396858 | 0. 571706 | -0. 24341 | -0. 8036  | YPL038W- <i>l</i> |
| 0. 26042529  | 0. 910923942 | 0. 093444318 | -0. 11565 | -0. 0263  | 0. 467856 | REX4              |
| 0. 260678949 | 1            | 0. 061449807 | 0. 090524 | 0. 004363 | 0. 396054 | YVH1              |
| 0. 260678949 | 0. 570704752 | 0. 306543708 | -0. 13245 | 0. 09845  | -0. 38201 | YNL046W           |
| 0. 261360372 | 0. 398327474 | 1            | 1. 488601 | 1. 528326 | 2. 307711 | None              |
| 0. 261360372 | 0. 398327474 | 1            | 1. 488645 | 1. 528372 | 2. 307731 | None              |
| 0. 261360372 | 0. 398327474 | 1            | 1. 48866  | 1. 528387 | 2. 307738 | IMA3              |
| 0. 261360372 | 0. 398327474 | 1            | 1. 488752 | 1. 528482 | 2. 30778  | None              |
| 0. 261360372 | 0. 398327474 | 1            | 1. 488698 | 1. 528427 | 2. 307756 | YOL162W           |
| 0. 261360372 | 0. 398327474 | 1            | 1. 488796 | 1. 528528 | 2. 307801 | ERR2              |
| 0. 261687453 | 0. 000288921 | 0. 168851078 | -0. 10736 | 0. 36151  | 0. 381978 | MDM35             |
| 0. 261898459 | 0. 890100171 | 1            | -0. 12252 | 0. 032135 | -0. 01682 | TVP38             |
| 0. 261960473 | 0. 925367028 | 1            | -0. 54213 | -0. 11059 | -0. 01733 | API2              |
| 0. 262364643 | 0. 203402724 | 0. 016772267 | -0. 1126  | -0. 16225 | -0. 60416 | SUL2              |
| 0. 262364643 | 0. 885372644 | 0. 969916554 | 0. 446681 | -0. 12325 | 0. 242015 | None              |
| 0. 264496157 | 0. 996195213 | 1            | 0. 116364 | 0. 009563 | -0. 02481 | SKI8              |
| 0. 264524843 | 0. 229077588 | 0. 264879577 | -0. 07762 | -0. 10755 | 0. 240839 | RBG2              |
| 0. 264578874 | 0. 690335313 | 1            | -0. 088   | -0. 04997 | 0. 002972 | NNT1              |
| 0. 264669641 | 0. 383120823 | 0. 077306681 | -0. 08731 | 0. 093119 | 0. 368589 | RPS11A            |
| 0. 26478544  | 0. 026572164 | 0. 769811029 | -0. 0894  | 0. 205005 | 0. 11974  | MRPL40            |
| 0. 264984343 | 0. 152734962 | 0. 96509354  | 0. 089592 | -0. 14291 | -0. 05073 | YEH2              |
| 0. 265092125 | 0. 938960046 | 0. 735465999 | 0. 187484 | 0. 03462  | -0. 27466 | RTS2              |
| 0. 265092125 | 0. 923429199 | 0. 837344851 | 0. 198452 | 0. 041815 | -0. 21931 | YBR284W           |
| 0. 265223394 | 0. 45545886  | 0. 617215067 | -0. 12956 | -0. 12132 | -0. 24409 | RAD16             |
| 0. 2652515   | 0. 023226764 | 0. 803017727 | -0. 11743 | 0. 274892 | 0. 143    | PML1              |
| 0. 266046387 | 0. 459558802 | 0. 162721427 | -1. 42609 | -1. 33877 | 5. 866568 | None              |
| 0. 266068831 | 0. 614870993 | 0. 071980397 | 0. 084068 | 0. 05785  | -0. 35925 | TGL4              |
| 0. 266297218 | 0. 111956571 | 1            | 1. 409586 | -2. 77622 | -1. 61098 | None              |
| 0. 266307186 | 0. 490263266 | 0. 286390317 | -0. 92693 | -0. 81508 | 3. 015359 | YKL106C- <i>l</i> |
| 0. 266545822 | 1            | 0. 442027801 | -0. 18006 | 0. 012428 | -0. 44108 | SPO22             |
| 0. 266926014 | 0. 690335313 | 0. 90428469  | 0. 092432 | -0. 05277 | -0. 07772 | CKS1              |
| 0. 267501776 | 1            | 0. 321715999 | 1. 245171 | 0. 019366 | 3. 743153 | None              |
| 0. 267883307 | 0. 928674902 | 0. 499488496 | -0. 13404 | 0. 027148 | -0. 30347 | FUR4              |
| 0. 267883307 | 1            | 0. 891897251 | -0. 6553  | 0. 033913 | 0. 585348 | YGL041C- <i>l</i> |
| 0. 268069048 | 0. 359885231 | 0. 971609311 | -0. 07035 | 0. 078845 | 0. 037736 | HOM2              |
| 0. 268321062 | 0. 020822428 | 0. 004134287 | -0. 10922 | 0. 261295 | 0. 676306 | RPS27B            |
| 0. 268321062 | 0. 812803114 | 0. 98500242  | -0. 25012 | -0. 09607 | 0. 113026 | YGR126W           |
| 0. 268943931 | 0. 471015153 | 0. 931568877 | 0. 128937 | -0. 11873 | 0. 089476 | MPS1              |
| 0. 269151101 | 0. 208240841 | 1            | 0. 105994 | 0. 15315  | 0. 005589 | YJL068C           |
| 0. 269187264 | 0. 387128577 | 0. 084919982 | -0. 0825  | 0. 087834 | 0. 345089 | SSS1              |
| 0. 269263443 | 0. 706697151 | 0. 630042336 | -0. 13818 | 0. 07596  | -0. 25721 | TAD3              |
| 0. 269632921 | 0. 302395299 | 0. 937470988 | 0. 131938 | 0. 163352 | -0. 0879  | YLR283W           |
| 0. 270450957 | 0. 460298273 | 0. 27982387  | -0. 37043 | 0. 343707 | 1. 13614  | None              |
| 0. 270552296 | 0. 069544572 | 0. 283104183 | 0. 558261 | 1. 094706 | 1. 741697 | YDR215C           |
| 0. 270936684 | 0. 404471627 | 0. 992021238 | 0. 070669 | -0. 07349 | -0. 03022 | RAD23             |
| 0. 271570793 | 0. 114362042 | 1            | 1. 402512 | -2. 76757 | -1. 60519 | None              |

|             |             |             |          |          |          |                   |
|-------------|-------------|-------------|----------|----------|----------|-------------------|
| 0.272315105 | 1           | 0.710913844 | -0.1629  | -0.01038 | 0.260286 | DBR1              |
| 0.27238208  | 0.516700017 | 0.791580335 | 0.076805 | 0.064713 | 0.098354 | CKB1              |
| 0.273152992 | 0.582123297 | 0.885798515 | -0.23267 | 0.17316  | 0.215466 | None              |
| 0.273152992 | 0.010643651 | 0.919926509 | 0.144983 | 0.382981 | -0.11152 | PRM4              |
| 0.273269904 | 0.012231886 | 0.326601143 | -0.08843 | 0.22937  | 0.255337 | MRPL8             |
| 0.273349816 | 0.378211699 | 0.536035164 | -0.10201 | -0.112   | -0.22163 | ADE5, 7           |
| 0.273898775 | 0.427585494 | 0.680777882 | -0.13701 | 0.13693  | 0.234698 | AIM4              |
| 0.274071909 | 0.386859362 | 0.243765908 | 0.596958 | -0.66551 | -2.12722 | None              |
| 0.274071909 | 0.969492509 | 0.781154036 | 0.123731 | 0.016853 | -0.16397 | HPA3              |
| 0.274071909 | 0.020195187 | 0.928019622 | -0.11179 | 0.271436 | -0.08116 | PCL5              |
| 0.274071909 | 0.263065203 | 0.981181758 | -0.12139 | 0.162031 | 0.058512 | DSC2              |
| 0.274199719 | 1           | 0.906168502 | 0.094126 | 9.17E-05 | 0.079004 | TAE1              |
| 0.274272676 | 0.892680849 | 0.856715553 | -0.31927 | -0.08437 | 0.335839 | None              |
| 0.275844456 | 0.679403914 | 0.571709772 | -0.35427 | 0.209619 | -0.735   | YBR182C- <i>l</i> |
| 0.275844456 | 0.864979821 | 1           | 0.166628 | 0.052059 | 0.039653 | YHL008C           |
| 0.27591551  | 0.19026538  | 0.669524096 | -0.07761 | -0.11754 | -0.13658 | URH1              |
| 0.276984686 | 0.999497264 | 0.840006224 | 0.072862 | -0.00548 | 0.081611 | FOL2              |
| 0.276984686 | 0.125331421 | 0.889649609 | 0.231961 | 0.399393 | -0.21041 | YPL119C- <i>l</i> |
| 0.277878807 | 1           | 1           | -0.18304 | 0.002196 | 0.040285 | MIG3              |
| 0.277924263 | 0.156840624 | 1           | 0.159157 | -0.2587  | 0.016615 | PSP1              |
| 0.278327698 | 0.335205662 | 0.803554162 | 0.399596 | 0.476872 | 0.497338 | None              |
| 0.278327698 | 0.399977002 | 1           | -0.16249 | -0.17237 | -0.00871 | SEC59             |
| 0.278350451 | 0.304011642 | 0.169244459 | -0.07426 | -0.09325 | 0.272994 | CMS1              |
| 0.278616717 | 0.709900242 | 0.486249492 | 0.102779 | 0.057207 | -0.24311 | NGL1              |
| 0.27970107  | 0.066428344 | 0.967394603 | -0.07807 | -0.15715 | -0.04462 | RAD27             |
| 0.280957488 | 0.415254519 | 0.061449807 | -0.10275 | -0.10632 | -0.46352 | MET30             |
| 0.281001218 | 0.738978817 | 0.361142562 | 0.558593 | 0.286768 | 1.571573 | YDR169C- <i>l</i> |
| 0.281588576 | 0.407136042 | 0.663264835 | 0.078836 | 0.083135 | 0.142532 | TAF10             |
| 0.281588576 | 0.014466754 | 1           | -0.10421 | -0.26916 | 0.017599 | STE20             |
| 0.281588576 | 0.384327883 | 1           | 0.453328 | 0.49923  | -0.04117 | YLR281C           |
| 0.282269706 | 0.615223063 | 0.143826946 | -0.07159 | -0.05068 | 0.276388 | NOP16             |
| 0.282269706 | 0.762648339 | 0.331418568 | 0.161862 | -0.07647 | -0.47089 | LAG2              |
| 0.282807102 | 1           | 0.617215067 | -0.10551 | 0.00784  | 0.206189 | BUR2              |
| 0.2830323   | 0.413532829 | 0.05005618  | -0.07219 | -0.07526 | 0.34325  | RPC82             |
| 0.28305633  | 0.097254638 | 0.017068248 | -0.08786 | 0.163103 | 0.489775 | RPL34B            |
| 0.28305633  | 0.062985577 | 0.411976149 | -0.08693 | -0.17782 | 0.228295 | IKI3              |
| 0.283821183 | 0.914594311 | 0.702041373 | 0.09529  | 0.022045 | -0.15859 | ICP55             |
| 0.283837129 | 0.934679773 | 0.201505014 | 0.083675 | -0.01668 | 0.296572 | NOP6              |
| 0.283837129 | 0.843062252 | 0.326601143 | 0.114088 | 0.03976  | -0.33571 | MNT4              |
| 0.283877634 | 0.900565868 | 1           | -0.10637 | 0.027096 | -0.00238 | ECM31             |
| 0.283987881 | 0.246040539 | 0.978338942 | 0.134685 | 0.188556 | 0.067811 | YMR114C           |
| 0.284418062 | 0.119397766 | 0.837446458 | 0.146957 | -0.2622  | 0.16885  | RBH2              |
| 0.284882787 | 0.902052728 | 0.739235535 | -1.37811 | -0.33332 | -1.87978 | None              |
| 0.285076511 | 0.332342438 | 0.675803696 | -0.07569 | 0.0919   | 0.133949 | YPT1              |
| 0.285179756 | 0.128825994 | 0.469965664 | -0.89698 | 1.530673 | 2.248352 | YPR159C- <i>l</i> |
| 0.285517801 | 0.614651456 | 0.904680493 | 0.093558 | -0.06701 | 0.080822 | NVJ2              |
| 0.286165394 | 0.096330761 | 0.016354225 | -0.08872 | 0.166169 | 0.50158  | RPL31A            |
| 0.286371638 | 0.802618659 | 0.550781538 | 0.90069  | 0.370057 | 2.009709 | YCR108C           |
| 0.286371638 | 0.150555145 | 0.637177071 | 0.126706 | -0.21191 | -0.24121 | SSY1              |
| 0.286668276 | 0.666883176 | 0.911946622 | 0.129679 | -0.08179 | 0.107943 | CEF1              |
| 0.287791843 | 0.048583022 | 0.765014016 | -0.16391 | 0.354291 | 0.23131  | AIM32             |
| 0.289257986 | 0.892744236 | 0.446640364 | -0.26225 | 0.070861 | -0.67468 | YEL014C           |
| 0.289361409 | 0.06762385  | 0.077007481 | 0.099286 | -0.20332 | 0.441118 | RRN6              |
| 0.290534032 | 0.861419309 | 0.818523526 | -0.1134  | -0.03686 | 0.138955 | NIP100            |

|              |              |              |           |           |           |           |
|--------------|--------------|--------------|-----------|-----------|-----------|-----------|
| 0. 29064775  | 0. 652939653 | 0. 292035407 | -0. 23017 | 0. 150706 | -0. 71421 | RRT6      |
| 0. 290810456 | 0. 052331103 | 0. 764340274 | -0. 08446 | 0. 181053 | 0. 120591 | VPS68     |
| 0. 291233786 | 0. 728435834 | 0. 507217503 | 0. 432859 | -0. 23747 | -1. 04168 | None      |
| 0. 291378134 | 0. 565156176 | 0. 053817845 | 0. 103218 | 0. 082769 | -0. 49088 | YFR045W   |
| 0. 291848358 | 0. 670089723 | 0. 557079281 | -0. 12081 | -0. 07596 | -0. 26367 | HEM14     |
| 0. 291997894 | 0. 332602552 | 0. 023617213 | -0. 07121 | -0. 08764 | 0. 387153 | DIM1      |
| 0. 291997894 | 0. 589760072 | 0. 863302781 | 0. 151259 | -0. 11579 | -0. 15983 | NFI1      |
| 0. 292073414 | 0. 805302069 | 1            | 0. 078005 | 0. 032125 | -0. 02945 | CDC10     |
| 0. 293061945 | 0. 220821919 | 0. 577843626 | 0. 123543 | 0. 182915 | -0. 26149 | SNT309    |
| 0. 293061945 | 0. 346488241 | 0. 790203342 | -0. 08908 | -0. 10716 | -0. 11879 | CEX1      |
| 0. 293115691 | 0. 628414107 | 0. 081519515 | 0. 060678 | -0. 04262 | 0. 268127 | GUA1      |
| 0. 293263457 | 0. 19339556  | 0. 706497696 | 0. 101329 | -0. 15814 | 0. 170713 | SHQ1      |
| 0. 293670621 | 0. 259482058 | 0. 186036369 | -0. 07503 | 0. 104654 | 0. 276491 | RPL2A     |
| 0. 29389959  | 0. 568084758 | 1            | 0. 098319 | 0. 078747 | 0. 009554 | FUN26     |
| 0. 296087169 | 1            | 0. 411976149 | -0. 11709 | 0. 000341 | -0. 31452 | GPI2      |
| 0. 296372391 | 9. 67595E-05 | 0. 822329423 | -0. 07343 | 0. 279598 | 0. 089981 | NNR2      |
| 0. 296645788 | 0. 116008771 | 0. 89719832  | -0. 15968 | 0. 290454 | -0. 14643 | HNT3      |
| 0. 296717351 | 0. 837878157 | 0. 507578381 | 0. 066053 | -0. 02424 | -0. 15667 | RET2      |
| 0. 297561113 | 0. 357606716 | 0. 855640301 | -0. 1949  | 0. 230838 | 0. 213524 | YAL037W   |
| 0. 297561113 | 0. 243460814 | 0. 868996053 | 0. 083233 | 0. 119832 | 0. 086702 | PHB2      |
| 0. 298072898 | 0. 795533688 | 0. 897056392 | -1. 02621 | 0. 423215 | -1. 02306 | None      |
| 0. 298823418 | 0. 867434951 | 0. 667670933 | -0. 10439 | 0. 033496 | -0. 19262 | HEM4      |
| 0. 298943582 | 0. 172864615 | 0. 537924573 | 0. 073825 | -0. 1205  | -0. 16835 | ALE1      |
| 0. 298943582 | 0. 672577856 | 0. 716456431 | 0. 113537 | -0. 07203 | 0. 186943 | SEC15     |
| 0. 299170258 | 0. 389906374 | 0. 458610066 | -0. 33508 | 0. 372142 | 0. 852905 | YOR105W   |
| 0. 299753508 | 0. 371648425 | 0. 218691212 | 0. 073596 | -0. 08603 | 0. 261881 | RTC5      |
| 0. 300228168 | 0. 196724669 | 0. 25778068  | 0. 226041 | -0. 35803 | 0. 765172 | None      |
| 0. 300439893 | 0. 04046433  | 0. 927229736 | 0. 082585 | 0. 189316 | -0. 06392 | GFD1      |
| 0. 300538674 | 0. 083428889 | 0. 058847237 | -0. 06741 | -0. 13453 | 0. 320626 | NUG1      |
| 0. 300538674 | 0. 367479128 | 0. 437847764 | -0. 52921 | -0. 6315  | -1. 57228 | YLL066C   |
| 0. 300601699 | 0. 20840105  | 0. 971609311 | 0. 930711 | 1. 443074 | -0. 44171 | None      |
| 0. 303282925 | 0. 116802721 | 0. 077306681 | -0. 082   | 0. 151167 | 0. 372374 | RPS2      |
| 0. 303594319 | 0. 801294446 | 1            | -0. 21542 | -0. 09179 | -0. 01056 | YLR146W-1 |
| 0. 303665899 | 0. 583819577 | 0. 328463464 | -0. 09814 | 0. 077183 | 0. 298637 | ILM1      |
| 0. 30560973  | 0. 899105948 | 1            | -0. 13018 | -0. 03488 | 0. 005606 | YJL206C   |
| 0. 305839844 | 0. 019432143 | 0. 18925097  | 0. 105299 | 0. 272895 | 0. 394431 | TIM13     |
| 0. 306037814 | 0. 987136522 | 0. 28514767  | 0. 074326 | -0. 00802 | 0. 241859 | SUI3      |
| 0. 306631119 | 0. 440961232 | 0. 194652731 | 0. 127465 | -0. 13298 | -0. 47433 | ATR1      |
| 0. 306631119 | 0. 48908547  | 0. 7990478   | 0. 338865 | -0. 32394 | -0. 4529  | YCL001W-1 |
| 0. 306631119 | 1            | 0. 930953395 | 0. 065893 | 0. 003286 | -0. 04963 | MDM38     |
| 0. 307571069 | 0. 04471877  | 0. 283510967 | 0. 142739 | -0. 32843 | -0. 46589 | KIP1      |
| 0. 307910947 | 0. 773803168 | 0. 411752857 | -0. 13061 | -0. 0618  | -0. 3595  | HST4      |
| 0. 308474954 | 0. 21006721  | 0. 824212757 | 0. 116808 | 0. 180782 | -0. 14528 | COX20     |
| 0. 308493907 | 0. 888561341 | 0. 990110569 | -0. 52481 | -0. 15096 | -0. 24596 | YMR247W-1 |
| 0. 308502968 | 0. 472617197 | 0. 855814602 | 0. 095086 | -0. 09379 | 0. 106671 | PMR1      |
| 0. 308847289 | 0. 079277191 | 1            | 0. 104173 | 0. 213531 | 0. 03556  | ESA1      |
| 0. 308975119 | 0. 596380201 | 0. 702041373 | -0. 93206 | 0. 704736 | -1. 64497 | None      |
| 0. 309304202 | 0. 795533688 | 0. 647387848 | -0. 07149 | 0. 031396 | 0. 139889 | EMC4      |
| 0. 309768212 | 1            | 1            | 0. 085981 | -0. 00217 | 0. 028111 | MCX1      |
| 0. 309959082 | 0. 176205372 | 1            | 0. 098928 | -0. 16409 | 0. 033099 | PRP2      |
| 0. 311019254 | 0. 533524502 | 0. 352373517 | -0. 12925 | 0. 113035 | -0. 38602 | GT01      |
| 0. 311308256 | 0. 459813614 | 0. 787324112 | 0. 066461 | -0. 0674  | 0. 092482 | VMA2      |
| 0. 311319327 | 0. 177242556 | 0. 599665071 | 0. 090744 | -0. 15023 | 0. 192911 | RAT1      |
| 0. 311319327 | 0. 889353732 | 0. 919271701 | 0. 129853 | -0. 03769 | 0. 108375 | SP075     |

|             |             |             |          |          |          |                   |
|-------------|-------------|-------------|----------|----------|----------|-------------------|
| 0.311828269 | 0.957701635 | 1           | -1.13205 | 0.179691 | 0.430731 | None              |
| 0.31279374  | 0.293605247 | 0.983370642 | 0.149516 | -0.20518 | -0.076   | SAP1              |
| 0.313312764 | 0.151210483 | 0.911946622 | 0.094084 | -0.16488 | -0.08193 | TAF2              |
| 0.313370952 | 0.501427533 | 0.871373143 | 0.153099 | 0.143228 | -0.16141 | FOX2              |
| 0.313527438 | 0.860071452 | 0.436621477 | 0.121395 | 0.041546 | -0.32718 | GUF1              |
| 0.313697952 | 0.289155055 | 0.009681125 | -0.07631 | 0.105056 | 0.47664  | RPS10A            |
| 0.31473832  | 0.135871655 | 0.559860815 | -0.23215 | 0.41626  | -0.52321 | YDL186W           |
| 0.315516374 | 0.758162333 | 1           | -0.07092 | -0.03633 | -0.01838 | ELP4              |
| 0.315616763 | 0.036314393 | 0.540074298 | -0.10227 | 0.244966 | 0.239166 | YOR020W- <i>l</i> |
| 0.315616763 | 0.486077625 | 1           | -1.35845 | -1.32854 | 1.884443 | None              |
| 0.315616763 | 0.486077625 | 1           | -1.35845 | -1.32854 | 1.884442 | None              |
| 0.315629158 | 0.388201329 | 0.029966612 | -0.07727 | 0.089497 | 0.424307 | GIM4              |
| 0.316287198 | 0.313190477 | 0.882626496 | -0.09933 | -0.13179 | 0.100899 | SET1              |
| 0.316287198 | 0.486407666 | 1           | -1.35406 | -1.32422 | 1.87909  | None              |
| 0.316287198 | 0.486407666 | 1           | -1.35407 | -1.32423 | 1.879091 | None              |
| 0.316287198 | 0.486407666 | 1           | -1.35408 | -1.32424 | 1.879091 | YOR072W- <i>l</i> |
| 0.316764556 | 0.486638529 | 1           | -1.3514  | -1.3216  | 1.875668 | None              |
| 0.318051793 | 0.207400802 | 0.076212737 | -0.10709 | -0.17009 | 0.501648 | REV1              |
| 0.318051793 | 0.051425193 | 1           | 0.105242 | -0.24011 | -0.03417 | SGO1              |
| 0.318547896 | 0.929321848 | 1           | 0.340941 | 0.075924 | 0.134107 | YOL038C- <i>l</i> |
| 0.318686644 | 0.138242749 | 0.350046527 | -0.08747 | 0.158017 | 0.266515 | ENV10             |
| 0.31886875  | 0.515305162 | 0.870558299 | -0.1155  | -0.10657 | -0.12374 | ELG1              |
| 0.319445411 | 0.767134842 | 0.274728931 | -0.21171 | 0.104656 | -0.72275 | FMT1              |
| 0.320021795 | 0.887204289 | 0.702041373 | -0.29997 | -0.0897  | 0.535804 | YHR050W- <i>l</i> |
| 0.321330557 | 0.295761003 | 0.98500242  | 0.108392 | -0.14997 | 0.05439  | ORC6              |
| 0.322716309 | 3.35757E-13 | 0.733389979 | -0.06944 | 0.466863 | 0.113701 | CAR1              |
| 0.322738784 | 0.060866598 | 0.847404354 | 0.120187 | -0.26728 | -0.14205 | TFC4              |
| 0.322902397 | 0.418783519 | 0.090019922 | 0.085864 | 0.095395 | 0.393561 | RPL11A            |
| 0.323315124 | 0.281429987 | 0.535437422 | 0.10361  | -0.14788 | -0.24793 | SPC42             |
| 0.323391198 | 0.390960813 | 0.818523526 | 0.137276 | 0.160932 | -0.1784  | MRX9              |
| 0.32389738  | 0.122042485 | 0.154422599 | -0.0951  | 0.17956  | -0.38801 | SNF11             |
| 0.324126642 | 0.532413738 | 0.871066692 | -0.07032 | -0.06332 | 0.075967 | GCD7              |
| 0.324990989 | 0.551240588 | 0.979069474 | 0.104739 | -0.09178 | -0.0565  | BUD9              |
| 0.325077275 | 0.666900591 | 0.846846052 | 0.957582 | 0.641784 | -1.10816 | URA3              |
| 0.325604383 | 0.890501573 | 0.656171223 | 1.305113 | 0.379511 | -2.21445 | None              |
| 0.325968779 | 0.268778676 | 0.949031652 | -0.09705 | -0.14167 | -0.06787 | SEC1              |
| 0.325968779 | 0.209021864 | 0.976378097 | -0.08852 | -0.14211 | -0.04987 | LEU3              |
| 0.326053133 | 1           | 1           | -0.22593 | 0.001985 | -0.06575 | None              |
| 0.326829307 | 0.879700572 | 0.86530488  | -0.77377 | -0.24464 | -0.89643 | YJL052C- <i>l</i> |
| 0.327147388 | 0.539585697 | 0.166524458 | -0.06205 | 0.055378 | 0.251429 | PMT4              |
| 0.327220197 | 0.933247294 | 0.137628042 | 0.062358 | 0.01365  | 0.26412  | ZPR1              |
| 0.327220197 | 0.560060607 | 0.731592804 | -0.13117 | 0.113072 | -0.21771 | DDL1              |
| 0.327294861 | 0.479322493 | 0.737914729 | -0.32685 | 0.325095 | -0.5343  | COA6              |
| 0.328094405 | 0.492472465 | 0.371343822 | 0.090569 | 0.088595 | -0.27288 | LGE1              |
| 0.328852529 | 0.729751469 | 0.276906403 | 0.690026 | 0.397523 | -2.52267 | ANS1              |
| 0.328852529 | 0.48908547  | 0.721271027 | 0.134968 | -0.13374 | -0.23109 | APM2              |
| 0.329102469 | 0.759694936 | 0.758049402 | 0.135656 | 0.070878 | -0.21046 | PHR1              |
| 0.329683224 | 0.068396254 | 1           | 0.080428 | -0.17689 | 0.016607 | SRP101            |
| 0.329716205 | 0.068479815 | 0.434148825 | -0.08177 | -0.17946 | 0.228368 | URB2              |
| 0.329867973 | 0.662458676 | 0.517080711 | -0.09295 | -0.0643  | 0.231999 | CSF1              |
| 0.330567777 | 0.089587852 | 0.985096068 | -0.08849 | -0.1839  | -0.04467 | TRF5              |
| 0.331694619 | 0.041913401 | 0.259100427 | -0.09205 | -0.22256 | 0.327038 | UTP25             |
| 0.331752063 | 0.013218736 | 1           | -0.09697 | -0.27822 | 0.034929 | CDC5              |
| 0.333008236 | 0.885372644 | 0.635840497 | -0.21527 | -0.06675 | 0.447782 | PRM3              |

|              |              |                                                              |
|--------------|--------------|--------------------------------------------------------------|
| 0. 33402172  | 0. 568084758 | 1 1. 254635 -1. 08341 -1. 8342 YBR298C- <i>l</i>             |
| 0. 33402172  | 0. 568084758 | 1 1. 254637 -1. 08342 -1. 8342 MATA1                         |
| 0. 33402172  | 0. 568084758 | 1 1. 254641 -1. 08343 -1. 83418 None                         |
| 0. 33402172  | 0. 568084758 | 1 1. 254644 -1. 08343 -1. 83417 None                         |
| 0. 33446962  | 0. 367878735 | 0. 020112784 -0. 06944 -0. 08702 0. 417514 HCA4              |
| 0. 33446962  | 0. 568257317 | 1 1. 251577 -1. 08059 -1. 83009 None                         |
| 0. 33446962  | 0. 568257317 | 1 1. 251588 -1. 0806 -1. 83009 None                          |
| 0. 33446962  | 0. 568257317 | 1 1. 251575 -1. 08059 -1. 83008 YBL112C                      |
| 0. 33446962  | 0. 568257317 | 1 1. 250445 -1. 07954 -1. 82858 None                         |
| 0. 33446962  | 0. 568257317 | 1 1. 250457 -1. 07955 -1. 82858 None                         |
| 0. 33446962  | 0. 568257317 | 1 1. 250458 -1. 07955 -1. 82858 None                         |
| 0. 33446962  | 0. 568257317 | 1 1. 250486 -1. 07959 -1. 82859 None                         |
| 0. 33446962  | 0. 568257317 | 1 1. 250504 -1. 07961 -1. 8286 None                          |
| 0. 334736106 | 0. 431585405 | 0. 119934904 0. 072567 -0. 08104 0. 321607 RPC31             |
| 0. 334736106 | 1            | 0. 485259038 0. 088972 0. 001488 -0. 23384 UBP5              |
| 0. 334736106 | 0. 731503094 | 0. 781511608 0. 122332 -0. 07101 -0. 18115 DGR2              |
| 0. 336569948 | 0. 00332216  | 0. 737914729 -0. 88534 3. 294633 1. 134506 COB               |
| 0. 336569948 | 0. 304757859 | 0. 924605282 -0. 08188 -0. 1143 0. 068778 VTC2               |
| 0. 336569948 | 0. 146651273 | 0. 976568193 0. 092453 -0. 17081 -0. 05265 BUD7              |
| 0. 338217104 | 0. 07307444  | 0. 821241649 0. 069518 0. 15285 0. 092513 RPN13              |
| 0. 339221641 | 0. 482993634 | 1 -0. 09148 -0. 09338 0. 030446 BYE1                         |
| 0. 340867276 | 0. 267877158 | 0. 786584362 0. 100888 -0. 15195 -0. 14878 SIR3              |
| 0. 341019864 | 0. 987715638 | 0. 39284795 0. 085627 0. 009782 -0. 25661 GRS2               |
| 0. 341019864 | 0. 82837317  | 0. 790203342 0. 132191 0. 054965 -0. 1925 QRI7               |
| 0. 342933023 | 0. 332602552 | 0. 538130573 0. 12541 0. 169617 -0. 30908 BUD5               |
| 0. 343424416 | 0. 729751469 | 0. 058656331 -0. 06505 0. 038514 0. 335386 NAM9              |
| 0. 344272488 | 0. 089471649 | 0. 359924954 -0. 0837 0. 177623 -0. 26271 MED7               |
| 0. 344719889 | 0. 286937957 | 0. 795907717 0. 359398 0. 526496 0. 516924 None              |
| 0. 344719889 | 0. 624879898 | 0. 981181758 -0. 0803 -0. 06238 0. 044171 PAL1               |
| 0. 345151456 | 0. 989216982 | 1 0. 108506 0. 011931 -0. 0218 MEC1                          |
| 0. 345294697 | 0. 519603006 | 0. 621646201 0. 064281 -0. 06165 0. 140236 NOP58             |
| 0. 345388905 | 0. 760989947 | 1 -0. 19509 -0. 10413 0. 028512 None                         |
| 0. 3461671   | 0. 737846426 | 0. 876848679 -0. 10071 0. 058288 0. 109856 CUS2              |
| 0. 346923071 | 0. 021842714 | 0. 539256261 -0. 13606 0. 373472 -0. 33588 SNA2              |
| 0. 34693915  | 0. 712726184 | 0. 207294989 0. 063849 0. 039914 0. 251435 RPL10             |
| 0. 347047312 | 0. 028907865 | 0. 187978416 0. 104661 0. 27645 0. 424078 SNC1               |
| 0. 347492646 | 0. 023493222 | 1 -0. 09275 0. 252474 0. 033072 FLX1                         |
| 0. 347579309 | 0. 725121662 | 0. 860528802 -0. 07038 0. 042526 0. 083215 IRC22             |
| 0. 347579309 | 0. 085297697 | 0. 985096068 -0. 11437 0. 246442 -0. 05939 PEX22             |
| 0. 347756232 | 0. 181661685 | 0. 937363635 -0. 08395 0. 146864 -0. 06496 TVP18             |
| 0. 347756232 | 0. 885372644 | 0. 98500242 -0. 07837 -0. 025 0. 040942 MAS2                 |
| 0. 348098689 | 0. 985451395 | 0. 750296312 0. 530311 0. 065031 -0. 87287 TAR1              |
| 0. 348099607 | 0. 057915483 | 0. 731592804 -0. 07447 0. 17416 0. 128634 SPE1               |
| 0. 348461573 | 0. 420342557 | 0. 643429399 -0. 13386 0. 155279 0. 283025 EGO2              |
| 0. 349509922 | 0. 404694575 | 0. 932528466 -0. 10782 -0. 12946 0. 085951 ROM2              |
| 0. 35157158  | 0. 662458676 | 0. 420929331 0. 195881 0. 141021 -0. 57341 DIN7              |
| 0. 351908627 | 0. 095680569 | 0. 007546041 -0. 08996 0. 190385 0. 618804 RPS28A            |
| 0. 353326542 | 0. 71619322  | 0. 992505689 -0. 07141 0. 044573 -0. 03527 URE2              |
| 0. 353470932 | 0. 267345812 | 0. 182165955 -0. 07172 0. 110088 0. 296513 RPL21A            |
| 0. 354313131 | 0. 149532164 | 0. 722897191 0. 070479 -0. 13346 0. 125593 PUS4              |
| 0. 354931695 | 0. 591976174 | 0. 667670933 0. 058632 0. 049928 0. 120278 TIF34             |
| 0. 355164572 | 0. 43696685  | 0. 875200775 0. 723502 0. 826541 0. 839266 None              |
| 0. 356040108 | 0. 518133314 | 0. 088859612 -0. 17555 -0. 17214 -0. 84931 TOP3              |
| 0. 356040108 | 0. 273631754 | 0. 984769539 -0. 62197 0. 931843 0. 320297 YMR242W- <i>l</i> |

|              |              |              |           |           |           |                   |
|--------------|--------------|--------------|-----------|-----------|-----------|-------------------|
| 0. 356353398 | 0. 880383419 | 0. 697639077 | 0. 080789 | 0. 027307 | 0. 156619 | CDC50             |
| 0. 356353398 | 0. 78141125  | 0. 886187413 | -0. 06647 | 0. 033494 | 0. 071815 | TAF14             |
| 0. 357092325 | 0. 865572034 | 0. 785906893 | -0. 42631 | -0. 15331 | 0. 657239 | None              |
| 0. 35719746  | 0. 427199949 | 0. 406901206 | -0. 13678 | -0. 1602  | -0. 41322 | PDR11             |
| 0. 357219564 | 0. 402273369 | 0. 48488876  | 0. 083259 | -0. 10199 | -0. 22807 | RKM1              |
| 0. 357602122 | 0. 853333651 | 0. 24850108  | 0. 078648 | -0. 03017 | 0. 297575 | LOC1              |
| 0. 359115951 | 0. 398327474 | 0. 688444366 | 0. 097247 | 0. 11997  | -0. 19253 | APC9              |
| 0. 359296449 | 0. 225615871 | 1            | 0. 206642 | -0. 34578 | 0. 072441 | RIM9              |
| 0. 360414799 | 0. 782318684 | 1            | 0. 438894 | -0. 22453 | 0. 073545 | JIP3              |
| 0. 360884325 | 0. 632634392 | 0. 805275919 | 0. 141071 | 0. 110844 | 0. 203979 | EAF5              |
| 0. 360981817 | 0. 592929724 | 0. 785906893 | 0. 091373 | -0. 07864 | -0. 14015 | GIP3              |
| 0. 361277469 | 0. 294101962 | 0. 689510419 | 0. 093232 | 0. 13913  | 0. 18507  | LT01              |
| 0. 362144443 | 0. 97665513  | 0. 961702496 | 0. 066395 | -0. 00971 | -0. 04619 | REX2              |
| 0. 362569633 | 0. 013423142 | 0. 292698979 | 0. 080596 | -0. 24446 | 0. 287438 | RET1              |
| 0. 362934866 | 0. 954916262 | 0. 7225564   | 0. 086852 | 0. 016208 | -0. 15714 | RPN14             |
| 0. 363083128 | 0. 53361689  | 1            | -0. 196   | -0. 1891  | -0. 03694 | MSH4              |
| 0. 363885381 | 0. 021143437 | 0. 554977541 | -0. 07528 | -0. 21549 | 0. 188611 | PWP2              |
| 0. 364453835 | 0. 300891646 | 0. 408117554 | -0. 0881  | 0. 130014 | 0. 270205 | OMS1              |
| 0. 364879872 | 0. 682008236 | 0. 90423793  | -0. 22675 | -0. 15818 | -0. 22876 | GPI19             |
| 0. 36514907  | 0. 118160579 | 0. 984628847 | 0. 097105 | -0. 20127 | 0. 053839 | CDC25             |
| 0. 36518532  | 0. 948002424 | 0. 950592115 | 0. 248564 | 0. 05056  | -0. 18549 | YOR034C- <i>l</i> |
| 0. 365273726 | 0. 549658075 | 0. 920011392 | -0. 10786 | 0. 101498 | 0. 097634 | INP54             |
| 0. 365538725 | 0. 788420725 | 0. 908303081 | 0. 09828  | -0. 04918 | 0. 096213 | SEC7              |
| 0. 365829248 | 0. 121986295 | 1            | -0. 05722 | -0. 11717 | 0. 009661 | PRS3              |
| 0. 366743749 | 0. 488031192 | 0. 878688605 | 0. 165369 | -0. 1763  | -0. 18675 | RAD34             |
| 0. 366857236 | 0. 412595975 | 1            | -0. 08948 | 0. 109067 | -0. 00824 | LPX1              |
| 0. 367015439 | 0. 748281711 | 0. 024892656 | -0. 10232 | 0. 059676 | -0. 63002 | IRC15             |
| 0. 367588755 | 0. 36194188  | 0. 403639619 | 0. 067766 | -0. 09122 | 0. 211059 | CWH41             |
| 0. 368742199 | 0. 483066965 | 1            | 0. 146701 | -0. 15899 | -0. 06523 | None              |
| 0. 369712337 | 0. 938960046 | 0. 264879577 | -0. 06966 | -0. 0155  | -0. 26114 | CUZ1              |
| 0. 370144204 | 0. 312955729 | 0. 807701151 | -0. 08308 | 0. 121331 | -0. 12108 | PEX11             |
| 0. 370682001 | 0. 460954134 | 0. 704009942 | 0. 089883 | 0. 101274 | -0. 17455 | PTP1              |
| 0. 370948395 | 0. 500005284 | 0. 739091337 | 0. 118975 | -0. 12449 | 0. 209646 | MY02              |
| 0. 371008039 | 0. 579910404 | 0. 630792731 | -0. 07883 | 0. 07081  | 0. 177197 | MSC6              |
| 0. 371381933 | 0. 653413831 | 0. 358747602 | -0. 07131 | 0. 054201 | 0. 236657 | SOP4              |
| 0. 371381933 | 0. 805302069 | 1            | -0. 11951 | 0. 056759 | 0. 030308 | ECM9              |
| 0. 372104548 | 0. 189891941 | 0. 664126703 | 0. 092391 | -0. 16752 | -0. 19665 | RLF2              |
| 0. 372347038 | 0. 783211483 | 1            | 0. 076973 | -0. 03961 | 0. 024452 | TOM1              |
| 0. 372838178 | 0. 317422835 | 1            | -0. 07435 | -0. 10878 | 0. 034181 | FLC2              |
| 0. 373167906 | 0. 121199858 | 0. 018622221 | -0. 07671 | 0. 158955 | 0. 499144 | RPS12             |
| 0. 373167906 | 0. 585153927 | 0. 846605423 | -0. 08717 | -0. 07788 | 0. 113981 | DU01              |
| 0. 373272047 | 0. 752831669 | 0. 48488876  | 0. 08672  | -0. 05065 | 0. 245238 | PRP39             |
| 0. 374007542 | 0. 332602552 | 0. 689558052 | 0. 077973 | -0. 11186 | 0. 158726 | SMY1              |
| 0. 37482818  | 0. 470910484 | 0. 906168502 | -0. 08632 | -0. 09642 | 0. 087058 | GEA1              |
| 0. 375334244 | 0. 750994992 | 0. 35748349  | 0. 083071 | -0. 04903 | -0. 27767 | SNF6              |
| 0. 37547895  | 0. 714010588 | 0. 737914729 | 1. 188046 | -0. 79814 | 1. 578356 | None              |
| 0. 376220386 | 0. 490597664 | 0. 50572517  | -0. 06046 | -0. 06481 | 0. 166998 | LCB2              |
| 0. 376220386 | 1            | 1            | -0. 08698 | -0. 00216 | 0. 021249 | RRG7              |
| 0. 37622516  | 0. 707813933 | 0. 215364043 | -0. 10246 | 0. 06841  | -0. 41827 | ISC1              |
| 0. 376599033 | 0. 972383608 | 0. 689558052 | -0. 0753  | -0. 01175 | -0. 15315 | MDL1              |
| 0. 377001755 | 0. 059509508 | 0. 019864748 | -0. 07297 | -0. 17929 | 0. 475073 | UTP10             |
| 0. 377035025 | 1            | 0. 13719416  | -0. 21253 | 0. 00677  | -0. 98772 | PIR5              |
| 0. 377088928 | 0. 048583022 | 1            | 1. 027919 | -3. 24256 | -1. 12655 | YLR012C           |
| 0. 377329602 | 0. 055084413 | 1            | -0. 288   | 0. 711007 | -0. 07091 | REC102            |

|              |              |              |           |           |           |           |
|--------------|--------------|--------------|-----------|-----------|-----------|-----------|
| 0. 377623831 | 0. 012650856 | 0. 850731953 | -0. 08565 | -0. 26916 | -0. 11081 | PCL9      |
| 0. 378500457 | 0. 305193244 | 0. 723935587 | 0. 192622 | -0. 29204 | -0. 35829 | SRX1      |
| 0. 378500457 | 0. 761207443 | 0. 798716083 | -0. 076   | 0. 042989 | -0. 11594 | VRP1      |
| 0. 378500457 | 0. 29048058  | 0. 850738592 | -0. 12815 | 0. 198018 | -0. 1652  | ART10     |
| 0. 379420701 | 0. 557203364 | 0. 286665818 | 0. 062398 | -0. 05976 | 0. 231822 | ACL4      |
| 0. 379485109 | 0. 972056407 | 0. 285413202 | 0. 112959 | 0. 017884 | -0. 41891 | CTK2      |
| 0. 379995563 | 0. 758146893 | 0. 711247098 | -0. 08175 | 0. 047204 | 0. 158973 | SAL1      |
| 0. 380147922 | 0. 837034378 | 0. 009538243 | -0. 08032 | -0. 03444 | -0. 56398 | ARG5, 6   |
| 0. 38028707  | 0. 794730765 | 0. 561585828 | 0. 07108  | 0. 035866 | -0. 18152 | VTI1      |
| 0. 38028707  | 0. 993185803 | 0. 801754205 | -0. 08328 | 0. 009159 | -0. 12616 | HST3      |
| 0. 38035117  | 0. 781865517 | 5. 21012E-05 | -0. 09265 | -0. 04879 | -0. 89833 | YJL213W   |
| 0. 38035117  | 0. 210094783 | 0. 490932171 | 0. 107991 | -0. 19215 | -0. 30721 | BIT61     |
| 0. 38035117  | 0. 779436383 | 0. 602672839 | 0. 087699 | 0. 046694 | -0. 20979 | DNM1      |
| 0. 38107788  | 0. 912696041 | 0. 667670933 | -0. 1008  | 0. 028352 | 0. 216888 | DUS4      |
| 0. 381758996 | 0. 729652252 | 0. 283481217 | 1. 180842 | -0. 76985 | -5. 0448  | None      |
| 0. 381930946 | 0. 202258032 | 1            | -0. 2189  | -0. 39636 | 0. 048039 | BSC5      |
| 0. 382345785 | 0. 849224058 | 0. 971609311 | -0. 7659  | -0. 30823 | 0. 528169 | None      |
| 0. 383033859 | 0. 551128078 | 1            | -0. 09376 | -0. 09129 | -0. 0235  | RTC1      |
| 0. 383434748 | 0. 796926114 | 0. 688444366 | 0. 11392  | -0. 05735 | -0. 23663 | YDR249C   |
| 0. 383557233 | 0. 094685918 | 0. 996250082 | -0. 14067 | 0. 316051 | -0. 07038 | YDR003W-1 |
| 0. 384097867 | 0. 683010493 | 0. 894989694 | 0. 12878  | -0. 09322 | 0. 14036  | ARV1      |
| 0. 385397203 | 0. 065404264 | 0. 98622493  | 0. 06276  | -0. 15436 | 0. 034697 | SRP54     |
| 0. 385449455 | 0. 068453606 | 0. 616944383 | 0. 065482 | -0. 1596  | 0. 155226 | NUP85     |
| 0. 386567145 | 0. 15633472  | 1            | 0. 100409 | -0. 1996  | -0. 00628 | MSH2      |
| 0. 386899036 | 0. 658845761 | 0. 017068248 | -0. 14629 | 0. 113145 | -0. 97227 | DIA1      |
| 0. 386899036 | 0. 516999501 | 0. 735602795 | -0. 08702 | 0. 090397 | 0. 159677 | BIL1      |
| 0. 386927242 | 8. 02366E-09 | 1            | -0. 07634 | 0. 472656 | -0. 01944 | OM45      |
| 0. 387557075 | 0. 487051554 | 1            | -0. 51899 | 0. 562869 | 0. 063686 | None      |
| 0. 387670868 | 0. 106565166 | 0. 164835808 | 0. 126649 | 0. 279248 | -0. 57246 | SIA1      |
| 0. 387670868 | 0. 039547582 | 0. 287070553 | -0. 59827 | -1. 74413 | 2. 638145 | PES4      |
| 0. 388421905 | 0. 996223442 | 0. 539379949 | -0. 07911 | 0. 008142 | 0. 212304 | ALG8      |
| 0. 389083167 | 0. 841196109 | 0. 99763155  | -0. 09353 | 0. 040026 | -0. 04671 | HYM1      |
| 0. 389530323 | 0. 934679773 | 0. 818523526 | -0. 08368 | 0. 02024  | 0. 122961 | LCB3      |
| 0. 390430297 | 0. 386354047 | 0. 003119282 | 0. 337323 | -0. 46075 | 2. 871864 | None      |
| 0. 390537503 | 0. 267877158 | 0. 587019533 | 0. 093135 | 0. 153357 | -0. 23298 | MDM31     |
| 0. 390728257 | 0. 72990982  | 0. 721271027 | 0. 118877 | 0. 076885 | -0. 22824 | DAD2      |
| 0. 391179222 | 0. 047950909 | 0. 251662308 | -0. 08085 | 0. 212664 | 0. 323954 | YDL121C   |
| 0. 391179222 | 0. 607973187 | 0. 614405454 | -0. 05703 | -0. 05031 | 0. 137044 | TOS1      |
| 0. 391330896 | 0. 486326234 | 0. 226565606 | 0. 081991 | -0. 09169 | 0. 341557 | APM3      |
| 0. 391412308 | 0. 681412538 | 0. 404196228 | -0. 47563 | -0. 34992 | -1. 65503 | IRC13     |
| 0. 394071196 | 0. 351913952 | 0. 889079564 | 0. 11584  | 0. 1663   | -0. 13202 | ATS1      |
| 0. 394071196 | 0. 622084537 | 0. 971609311 | 0. 086063 | -0. 07392 | 0. 058242 | SLH1      |
| 0. 394556513 | 0. 051638227 | 0. 106067898 | -0. 09166 | 0. 238489 | -0. 46106 | GIS3      |
| 0. 394556513 | 0. 57699983  | 0. 927845118 | -0. 07021 | 0. 066254 | -0. 06396 | APP1      |
| 0. 394650502 | 0. 913562569 | 0. 91247927  | 0. 079261 | 0. 022804 | 0. 080048 | SML1      |
| 0. 394756495 | 0. 370720975 | 0. 931005601 | 0. 077048 | -0. 10761 | 0. 068083 | RFT1      |
| 0. 395457605 | 0. 190275098 | 1            | 0. 088042 | -0. 16672 | -0. 01365 | LAA1      |
| 0. 396191694 | 0. 945012036 | 0. 252517824 | -0. 87879 | 0. 187702 | -4. 34664 | None      |
| 0. 39643532  | 0. 095680569 | 0. 818523526 | -0. 11538 | -0. 26684 | -0. 1719  | KIC1      |
| 0. 39643532  | 0. 472617197 | 1            | -1. 11401 | 1. 295403 | -1. 92421 | None      |
| 0. 39643532  | 0. 472617197 | 1            | -1. 11401 | 1. 295406 | -1. 9242  | YLR154C-1 |
| 0. 396451884 | 0. 498387456 | 0. 05699962  | 1. 016112 | 1. 114145 | 6. 725497 | None      |
| 0. 396451884 | 0. 472617197 | 1            | -1. 11059 | 1. 291674 | -1. 919   | None      |
| 0. 396451884 | 0. 472617197 | 1            | -1. 11061 | 1. 291693 | -1. 91903 | None      |



|             |             |             |          |          |          |                   |
|-------------|-------------|-------------|----------|----------|----------|-------------------|
| 0.396451884 | 0.472617197 | 1           | -1.11047 | 1.291578 | -1.91897 | YCL068C           |
| 0.396451884 | 0.472617197 | 1           | -1.11049 | 1.29159  | -1.91897 | None              |
| 0.396451884 | 0.472617197 | 1           | -1.11063 | 1.291706 | -1.91903 | None              |
| 0.396451884 | 0.472617197 | 1           | -1.11065 | 1.291722 | -1.91904 | None              |
| 0.396451884 | 0.472617197 | 1           | -1.11054 | 1.291634 | -1.91899 | None              |
| 0.396451884 | 0.472617197 | 1           | -1.11052 | 1.291613 | -1.91898 | None              |
| 0.396451884 | 0.472617197 | 1           | -1.11067 | 1.291744 | -1.91905 | IMA3              |
| 0.396451884 | 0.472617197 | 1           | -1.11057 | 1.291654 | -1.91899 | ATG16             |
| 0.396451884 | 0.472617197 | 1           | -1.11058 | 1.291661 | -1.91899 | None              |
| 0.396451884 | 0.633671893 | 1           | 0.293958 | -0.24854 | 9.18E-05 | None              |
| 0.39736564  | 0.653413831 | 0.931005601 | 0.065011 | 0.052096 | 0.057602 | MDE1              |
| 0.39736564  | 0.898322904 | 0.985234915 | -0.06481 | 0.020731 | 0.037027 | DPM1              |
| 0.397934074 | 0.763546663 | 0.946814146 | -0.07987 | -0.04651 | 0.064878 | SRS2              |
| 0.398161372 | 0.102281008 | 0.893930829 | 0.866372 | 2.056152 | 1.236714 | YDR366C           |
| 0.398775963 | 1           | 0.90453709  | 0.110054 | 0.008268 | -0.11807 | CAK1              |
| 0.399248532 | 0.708957109 | 0.444473065 | -0.09282 | 0.064716 | 0.290921 | URM1              |
| 0.399263239 | 0.110870889 | 0.30954724  | -0.0981  | 0.21914  | 0.366898 | IRC19             |
| 0.399486128 | 0.011098952 | 0.800614102 | -0.08247 | 0.273958 | -0.12991 | OPY2              |
| 0.399486128 | 1           | 0.978193638 | 0.099694 | -0.00761 | 0.062643 | GOS1              |
| 0.400275733 | 0.220839812 | 1           | 0.524577 | 0.951711 | -0.09652 | None              |
| 0.400742201 | 0.909881518 | 0.040274266 | -0.06104 | 0.018199 | 0.378375 | RPB8              |
| 0.400799258 | 0.860071452 | 0.10735086  | -0.69574 | 0.271862 | 3.823678 | YEL009C- <i>l</i> |
| 0.40115349  | 0.788420725 | 0.875100022 | -0.0686  | 0.036742 | -0.08436 | YRM1              |
| 0.40115349  | 0.63838067  | 1           | 0.069028 | -0.05795 | -0.02016 | RKM4              |
| 0.401411314 | 0.989163332 | 0.517082803 | 0.093389 | -0.01154 | -0.26589 | SCS3              |
| 0.40296719  | 0.676672695 | 0.748790103 | -0.69483 | 0.514662 | -1.32363 | None              |
| 0.403894146 | 0.776883749 | 0.573905565 | -0.06195 | 0.034661 | 0.162675 | VOA1              |
| 0.403894146 | 0.507001261 | 0.600468279 | -0.61027 | 0.654348 | -1.59569 | VPS63             |
| 0.403894146 | 0.596380201 | 0.7990478   | -0.05579 | 0.051725 | 0.089148 | PH086             |
| 0.404135059 | 0.184976433 | 0.023954838 | -0.06636 | 0.128444 | 0.444227 | RPS15             |
| 0.404206899 | 0.953675948 | 0.255041627 | -0.87123 | 0.173624 | -4.35305 | None              |
| 0.404884374 | 0.460638341 | 0.2432512   | 0.175448 | -0.21273 | -0.72886 | DAN4              |
| 0.405542876 | 0.017727781 | 0.717477893 | 0.075766 | -0.24142 | 0.151894 | NAM7              |
| 0.406447371 | 0.628871924 | 0.372341789 | -0.81158 | -0.70517 | -3.53082 | None              |
| 0.406447371 | 0.864977468 | 0.620580042 | 0.110791 | -0.04431 | 0.272229 | KEG1              |
| 0.406447371 | 0.12956062  | 0.756960007 | 0.077287 | -0.16875 | -0.13949 | MCM5              |
| 0.406447371 | 0.132874131 | 1           | -0.08061 | -0.17441 | 0.030211 | SUM1              |
| 0.406604994 | 0.202307461 | 0.7225564   | -0.11524 | -0.21838 | 0.227556 | RRN5              |
| 0.406916571 | 0.125506798 | 1           | -0.59806 | -1.38954 | 0.211378 | None              |
| 0.408096993 | 0.516999501 | 0.98500242  | 0.096158 | -0.10461 | 0.057504 | NUP120            |
| 0.408362401 | 0.295899479 | 0.328203537 | -0.06486 | -0.10539 | 0.2408   | SXM1              |
| 0.40851922  | 0.958639237 | 0.259295923 | -0.87009 | 0.16577  | -4.34461 | VTH1              |
| 0.408829096 | 0.052331103 | 0.462275118 | -0.07479 | 0.200053 | 0.234048 | TIM17             |
| 0.409337584 | 0.008063203 | 0.292547062 | 0.076335 | -0.26939 | 0.298225 | NOP14             |
| 0.409337584 | 0.114760758 | 0.667995836 | 0.082365 | -0.18729 | 0.187607 | AFT2              |
| 0.40954051  | 0.735101186 | 0.058656331 | -0.07522 | 0.049563 | 0.439621 | RPC19             |
| 0.411973009 | 0.874643786 | 0.997577123 | -0.23566 | -0.09051 | -0.12391 | SP011             |
| 0.412754391 | 0.806613916 | 0.716456431 | -0.10596 | -0.05429 | -0.21495 | KAR9              |
| 0.414238114 | 0.391083591 | 0.962371769 | -0.07058 | 0.09793  | -0.05357 | LSM4              |
| 0.414740444 | 0.791197208 | 1           | -0.0596  | 0.032402 | 0.029511 | DAK1              |
| 0.415754315 | 0.745058477 | 0.484106841 | -0.58736 | 0.372649 | 1.81626  | BUD25             |
| 0.415754315 | 0.884663483 | 0.488400105 | -0.12653 | 0.046657 | -0.38528 | YPL191C           |
| 0.416125084 | 0.371424217 | 0.373162993 | -0.15123 | 0.218407 | -0.53494 | YKL107W           |
| 0.416947561 | 0.770350536 | 0.859694751 | -0.05128 | 0.030025 | 0.069574 | PBP1              |

|              |              |              |           |           |           |                   |
|--------------|--------------|--------------|-----------|-----------|-----------|-------------------|
| 0. 417423315 | 0. 950685743 | 0. 317145408 | 0. 087862 | 0. 019091 | 0. 338023 | HTL1              |
| 0. 417496618 | 0. 100174653 | 1            | 0. 094398 | -0. 22523 | -0. 0035  | CEP3              |
| 0. 418093106 | 0. 224402423 | 0. 003209307 | -0. 06448 | 0. 119716 | 0. 54105  | RPL38             |
| 0. 419611321 | 0. 923264493 | 0. 281242785 | -0. 41045 | -0. 11496 | 1. 680637 | None              |
| 0. 419611321 | 0. 934743268 | 0. 919033438 | 0. 096219 | -0. 02466 | 0. 098539 | CLB4              |
| 0. 420166402 | 0. 408586762 | 0. 846934431 | -0. 07472 | -0. 10192 | -0. 10646 | RLM1              |
| 0. 420166402 | 0. 770350536 | 1            | -0. 08781 | -0. 05176 | 0. 044373 | MSM1              |
| 0. 421161976 | 0. 69919914  | 0. 847404354 | -0. 07098 | 0. 052779 | 0. 100825 | DHH1              |
| 0. 421375059 | 0. 246548074 | 0. 082586739 | -0. 5406  | -1. 0132  | -4. 75195 | None              |
| 0. 42142764  | 0. 740479146 | 0. 723935587 | -0. 07071 | -0. 0469  | -0. 14244 | TFC7              |
| 0. 421733381 | 0. 502826515 | 0. 3133427   | 0. 263114 | -0. 30554 | -1. 04857 | None              |
| 0. 421896486 | 0. 32171509  | 0. 2597044   | 0. 078626 | -0. 12592 | -0. 32978 | INO2              |
| 0. 421896486 | 0. 911433046 | 0. 983364433 | 0. 083564 | -0. 02575 | 0. 052432 | HSM3              |
| 0. 422183363 | 0. 103550972 | 0. 488102089 | 0. 068365 | 0. 162181 | 0. 211554 | MRP13             |
| 0. 423691896 | 0. 624111878 | 0. 972387712 | 0. 090146 | -0. 08169 | -0. 06338 | SEN34             |
| 0. 423991949 | 0. 980772539 | 0. 69579659  | 0. 100809 | 0. 015461 | -0. 22252 | YDR444W           |
| 0. 424084529 | 0. 148133144 | 0. 47679402  | 0. 079054 | -0. 17167 | -0. 2493  | SWP82             |
| 0. 424084529 | 0. 110984851 | 0. 659101564 | -0. 82981 | -2. 12163 | -2. 18878 | None              |
| 0. 424588452 | 0. 398327474 | 0. 527992521 | 0. 632559 | -0. 91469 | 1. 962694 | YFL015C           |
| 0. 424678133 | 1            | 0. 670493385 | 0. 107102 | -0. 00539 | 0. 248892 | ADY3              |
| 0. 426588858 | 0. 499790811 | 1            | -0. 09803 | 0. 113748 | -0. 01206 | ACS1              |
| 0. 427061225 | 0. 289514278 | 0. 962371769 | -0. 18226 | 0. 309177 | 0. 141899 | SP01              |
| 0. 427131927 | 0. 631878695 | 1            | -0. 11624 | 0. 103586 | 0. 04682  | AIM24             |
| 0. 427397816 | 0. 62038519  | 0. 844058435 | -1. 09104 | -1. 00902 | -1. 08052 | None              |
| 0. 427719554 | 0. 318028924 | 0. 721655021 | 0. 065121 | -0. 10601 | -0. 13387 | CST26             |
| 0. 428499065 | 0. 996805372 | 0. 333300106 | 0. 062278 | -0. 00675 | -0. 23778 | TFA2              |
| 0. 42862699  | 0. 905968424 | 0. 987206488 | 0. 664462 | 0. 213766 | -0. 38912 | None              |
| 0. 429465176 | 0. 058385914 | 0. 290004916 | 0. 055173 | -0. 15103 | 0. 22444  | UTP7              |
| 0. 429564085 | 0. 051484274 | 0. 320515456 | 0. 097137 | -0. 27355 | -0. 38045 | YMR147W           |
| 0. 429645418 | 0. 010710362 | 0. 931005601 | -0. 06072 | -0. 21581 | -0. 05735 | ASH1              |
| 0. 429716164 | 0. 292882664 | 0. 326232595 | -0. 08998 | 0. 153052 | -0. 34732 | LAS17             |
| 0. 430758559 | 0. 391096287 | 0. 907281575 | 0. 082752 | -0. 11893 | 0. 092458 | STH1              |
| 0. 430870035 | 0. 021955716 | 0. 871950707 | 0. 078408 | -0. 25463 | 0. 10328  | MNL2              |
| 0. 430876441 | 1            | 0. 449106932 | 0. 092855 | -0. 00442 | -0. 30665 | TAM41             |
| 0. 431366783 | 0. 2517386   | 0. 906628341 | -0. 08779 | 0. 160203 | -0. 09835 | CYC3              |
| 0. 431366783 | 0. 565156176 | 0. 971609311 | 0. 105483 | -0. 11019 | -0. 07725 | MLH1              |
| 0. 431520716 | 0. 367820737 | 0. 575130318 | -0. 06372 | 0. 095803 | 0. 176017 | TIM23             |
| 0. 431979    | 0. 867220499 | 1            | -0. 05624 | -0. 02325 | -0. 01657 | LAG1              |
| 0. 432245772 | 0. 033587112 | 0. 704128889 | 0. 066348 | -0. 20187 | -0. 14516 | ADE1              |
| 0. 432793689 | 8. 36301E-07 | 0. 419798397 | 0. 0501   | 0. 29793  | 0. 172602 | FRE1              |
| 0. 433251798 | 0. 328303501 | 0. 234642247 | 0. 085699 | 0. 138429 | -0. 38148 | PTC1              |
| 0. 433251798 | 0. 995958449 | 0. 845203377 | -0. 10394 | 0. 011813 | -0. 15331 | DSE3              |
| 0. 433251798 | 0. 021955716 | 0. 90453709  | -0. 08677 | 0. 280959 | -0. 09922 | IG01              |
| 0. 433258424 | 0. 915512205 | 0. 931568877 | -0. 09625 | 0. 029169 | -0. 09041 | ERV2              |
| 0. 43342275  | 0. 929429208 | 0. 621769539 | 0. 133513 | 0. 036784 | -0. 34376 | YHR173C           |
| 0. 43421858  | 0. 332342438 | 0. 278641706 | -0. 05753 | 0. 092453 | 0. 241256 | ERV25             |
| 0. 434862435 | 0. 963282012 | 0. 649011773 | -0. 08822 | -0. 01744 | 0. 217937 | ERD1              |
| 0. 435003996 | 0. 819842906 | 0. 98500242  | -0. 19888 | 0. 101716 | -0. 1253  | YMR158C- <i>l</i> |
| 0. 43517854  | 0. 860318409 | 0. 854563991 | -0. 10481 | -0. 04501 | 0. 149855 | AVT2              |
| 0. 436053855 | 0. 731353745 | 0. 904680493 | -0. 06508 | 0. 04564  | -0. 07461 | BSD2              |
| 0. 436079267 | 0. 567056169 | 0. 702041373 | 0. 053179 | 0. 055766 | -0. 11787 | VMA5              |
| 0. 436130112 | 0. 72983614  | 0. 89719832  | -0. 07555 | 0. 053313 | 0. 090454 | FPR2              |
| 0. 436144377 | 0. 022141152 | 0. 930835922 | 0. 723194 | 2. 55392  | 0. 969697 | None              |
| 0. 436221143 | 1            | 0. 443825882 | 0. 089686 | -0. 00602 | -0. 30168 | YEL1              |

|              |              |              |           |           |           |                   |
|--------------|--------------|--------------|-----------|-----------|-----------|-------------------|
| 0. 436409805 | 0. 091723089 | 0. 744376434 | -0. 10565 | 0. 265613 | 0. 207376 | IG02              |
| 0. 437412793 | 0. 249953428 | 1            | -0. 06763 | -0. 12577 | -0. 01799 | CCA1              |
| 0. 437577112 | 0. 447427868 | 1            | 0. 091396 | -0. 12033 | -0. 0372  | THP3              |
| 0. 438751901 | 0. 398327474 | 0. 929303164 | -0. 11991 | -0. 1728  | 0. 117792 | FCY22             |
| 0. 439290495 | 0. 265035517 | 0. 142407082 | 0. 076705 | 0. 139777 | -0. 39708 | VPS28             |
| 0. 439329367 | 0. 47767593  | 0. 744376434 | 0. 205268 | -0. 25767 | -0. 40552 | PTH1              |
| 0. 440288099 | 0. 293118671 | 0. 87592683  | -0. 0705  | 0. 122517 | 0. 092861 | ATP11             |
| 0. 440420243 | 0. 379381608 | 0. 048861894 | -0. 06525 | 0. 097766 | 0. 420209 | RPL35B            |
| 0. 440420243 | 0. 66730791  | 0. 397744731 | 0. 052101 | -0. 04368 | 0. 188199 | PMT2              |
| 0. 441964657 | 0. 197970471 | 0. 996250082 | 0. 098449 | 0. 200694 | 0. 055177 | REC107            |
| 0. 442041336 | 0. 099512037 | 0. 924605282 | 0. 079945 | -0. 20035 | 0. 082581 | SFH1              |
| 0. 442771213 | 0. 501380766 | 0. 28514767  | -0. 16823 | 0. 200284 | 0. 707138 | None              |
| 0. 443142558 | 0. 011022568 | 0. 558164588 | -0. 10291 | 0. 371808 | 0. 298783 | COX23             |
| 0. 443202624 | 0. 479322493 | 0. 971609311 | 0. 063112 | -0. 07915 | 0. 046802 | PEP1              |
| 0. 444327428 | 0. 990169077 | 1            | 0. 063959 | 0. 008343 | 0. 012233 | YGR210C           |
| 0. 444607845 | 0. 999736798 | 0. 863302781 | -0. 07275 | 0. 007427 | -0. 10218 | DAM1              |
| 0. 444839476 | 0. 371969831 | 0. 404093924 | -0. 44006 | 0. 667856 | 1. 583448 | None              |
| 0. 445299476 | 0. 310898763 | 0. 562048326 | -0. 11259 | 0. 190815 | 0. 325848 | YIL102C- <i>l</i> |
| 0. 445643535 | 0. 666045601 | 0. 385856136 | -0. 07904 | -0. 06727 | -0. 29208 | YLR326W           |
| 0. 445643535 | 0. 443822075 | 0. 466577874 | 0. 100443 | 0. 134828 | -0. 33458 | SNA4              |
| 0. 445793341 | 0. 979904046 | 0. 835544417 | -0. 30391 | 0. 049338 | -0. 47686 | None              |
| 0. 446698906 | 0. 729387705 | 0. 934548631 | 0. 068239 | 0. 049416 | 0. 065049 | GIM3              |
| 0. 446982506 | 0. 169156472 | 0. 89826709  | -0. 05538 | -0. 12015 | 0. 067281 | SUN4              |
| 0. 446982506 | 0. 335596279 | 0. 92566928  | -0. 09905 | 0. 161699 | 0. 102157 | WIP1              |
| 0. 447810471 | 0. 062448847 | 0. 971609311 | -0. 06601 | -0. 18466 | 0. 050147 | NMD5              |
| 0. 450593399 | 0. 858780357 | 0. 645770166 | -0. 0555  | 0. 024806 | 0. 142208 | FSH1              |
| 0. 451974436 | 0. 466698817 | 0. 7225564   | -0. 07473 | 0. 097368 | -0. 16016 | CDH1              |
| 0. 453158669 | 0. 922260875 | 0. 946857728 | 0. 510246 | -0. 1559  | 0. 459422 | YMR030W- <i>l</i> |
| 0. 454297571 | 0. 30849299  | 0. 244196805 | 0. 204062 | 0. 35347  | 0. 931384 | YAL037C- <i>l</i> |
| 0. 454297571 | 0. 167081065 | 0. 710425231 | -0. 10586 | 0. 232666 | 0. 238331 | QDR1              |
| 0. 454327978 | 1            | 0. 614405454 | 0. 336557 | -0. 01776 | -0. 92199 | YLR111W           |
| 0. 455436806 | 0. 084678945 | 0. 992792463 | -0. 09905 | -0. 2643  | 0. 059355 | SYT1              |
| 0. 456035036 | 0. 885181241 | 0. 75616091  | 0. 287308 | 0. 113581 | -0. 56749 | YHL018W           |
| 0. 456079281 | 0. 389906374 | 0. 860528802 | 0. 061334 | -0. 09279 | -0. 08923 | MSN5              |
| 0. 456393088 | 0. 461982321 | 0. 863302781 | 0. 065839 | -0. 0875  | 0. 094792 | HER1              |
| 0. 456393088 | 0. 242062719 | 0. 984769539 | -0. 18031 | -0. 3537  | -0. 12019 | None              |
| 0. 456709929 | 0. 836107259 | 0. 471735065 | 0. 061643 | -0. 03081 | 0. 208693 | TAF9              |
| 0. 456864854 | 1            | 0. 976378097 | 0. 427924 | 0. 042944 | 0. 30966  | None              |
| 0. 457298356 | 0. 767459399 | 0. 181792015 | 0. 587464 | -0. 38355 | 3. 235831 | None              |
| 0. 45812894  | 0. 936093775 | 0. 404219832 | -0. 0529  | -0. 01438 | -0. 19524 | LAC1              |
| 0. 460921436 | 1            | 0. 076212737 | -0. 05058 | -0. 00264 | 0. 310207 | KRR1              |
| 0. 461833112 | 0. 164247051 | 0. 87973401  | -0. 08851 | -0. 19949 | -0. 11905 | PDS5              |
| 0. 462087533 | 0. 139798632 | 0. 523868802 | 0. 080683 | 0. 190823 | -0. 2553  | IPT1              |
| 0. 462087533 | 0. 2946997   | 1            | 0. 075854 | -0. 13764 | 0. 028219 | ELP6              |
| 0. 462104267 | 0. 838256028 | 0. 782726705 | -0. 09834 | 0. 049119 | -0. 18422 | BIT2              |
| 0. 462203351 | 0. 00412351  | 0. 015440085 | 0. 056246 | -0. 23316 | -0. 44325 | SER33             |
| 0. 462283844 | 0. 427585494 | 0. 924605282 | -0. 08874 | 0. 126485 | -0. 09483 | ECO1              |
| 0. 464872819 | 0. 157263376 | 0. 845425423 | -0. 06334 | -0. 14552 | 0. 099293 | POP1              |
| 0. 465083745 | 0. 177946472 | 1            | -0. 46693 | 1. 013728 | -0. 00303 | YDL114W           |
| 0. 465274903 | 0. 408586762 | 0. 828700369 | -0. 12005 | 0. 177941 | 0. 199112 | ZIP2              |
| 0. 46571338  | 0. 94100612  | 0. 260184264 | 0. 162904 | 0. 042444 | -0. 73807 | CIS1              |
| 0. 465875951 | 0. 788420725 | 0. 203190491 | -0. 0556  | 0. 033667 | -0. 27524 | YME2              |
| 0. 46614682  | 0. 295659    | 0. 656171223 | 0. 064495 | 0. 117123 | -0. 1671  | ARG7              |
| 0. 466719439 | 0. 962506362 | 1            | 0. 116355 | 0. 024728 | 0. 001743 | YPR003C           |

|             |             |             |          |          |          |         |
|-------------|-------------|-------------|----------|----------|----------|---------|
| 0.46722467  | 0.690730215 | 0.240728867 | -0.66536 | -0.55375 | -4.13256 | PAU18   |
| 0.467282523 | 1           | 0.656171223 | -0.05437 | -0.00166 | -0.14099 | PLB1    |
| 0.467471293 | 0.916105608 | 0.952970302 | -0.05138 | 0.016554 | 0.045932 | ARO4    |
| 0.468011402 | 0.43160484  | 0.879698394 | 0.073425 | -0.10555 | 0.100405 | NUP145  |
| 0.469032978 | 0.36814865  | 0.102137973 | -0.12453 | 0.200568 | -0.72983 | YPL109C |
| 0.469314761 | 1.39043E-05 | 0.8119342   | 0.068916 | 0.396688 | 0.120648 | FMP10   |
| 0.469945836 | 0.514580981 | 1           | 0.051489 | -0.06342 | 0.018425 | SEC23   |
| 0.470564194 | 0.686392021 | 0.264879577 | -0.05216 | 0.044083 | 0.238384 | SFM1    |
| 0.470600728 | 0.304258036 | 0.889649609 | 0.088323 | 0.1592   | 0.115893 | ADH7    |
| 0.471026913 | 0.384917942 | 0.920656396 | -0.06816 | -0.1071  | 0.075465 | RXT3    |
| 0.471110117 | 0.313366226 | 0.733389979 | 0.112571 | 0.200009 | -0.24456 | ASR1    |
| 0.471194063 | 0.979425666 | 0.780254446 | 0.083483 | -0.01443 | -0.16127 | YPR084W |
| 0.471771234 | 0.78787983  | 0.878688605 | 0.064775 | 0.039916 | -0.08949 | CUE3    |
| 0.47186612  | 0.749821409 | 0.774060671 | -0.06121 | 0.043569 | 0.119907 | DJP1    |
| 0.472099422 | 0.269605331 | 0.056523979 | 0.053072 | 0.102047 | 0.352923 | RPS7B   |
| 0.472852539 | 0.341983981 | 1           | -0.06764 | -0.1153  | -0.03809 | TRE2    |
| 0.473053352 | 0.680755208 | 0.826140021 | 0.071397 | -0.06181 | 0.121362 | YPL039W |
| 0.473146488 | 0.13817594  | 0.861402377 | -0.07038 | -0.17151 | -0.10563 | STD1    |
| 0.473261218 | 0.989216982 | 1           | 0.149685 | 0.021173 | -0.07123 | RRT1    |
| 0.47343817  | 0.47499087  | 0.600528962 | 0.051806 | 0.069339 | 0.149287 | SEC61   |
| 0.47343817  | 0.167141351 | 0.994442854 | 0.060882 | -0.13987 | 0.037289 | YLR287C |
| 0.474051984 | 0.83092898  | 0.630792731 | 0.092795 | 0.049139 | -0.25441 | RTT105  |
| 0.474339931 | 0.157263376 | 0.440092898 | 0.141104 | 0.329842 | -0.51271 | SPR1    |
| 0.474339931 | 0.023260849 | 0.915496392 | 0.069116 | -0.24232 | -0.08058 | HRD3    |
| 0.474541677 | 0.324783906 | 1           | -0.06644 | -0.11705 | -0.02647 | PMT6    |
| 0.475293561 | 0.425809904 | 0.574248891 | 0.181204 | -0.26908 | -0.54745 | YOR302W |
| 0.475336639 | 0.709900242 | 0.937344825 | 0.068812 | -0.0556  | 0.068381 | EMC2    |
| 0.475997678 | 1           | 0.708493888 | -0.15766 | 0.004338 | -0.37469 | DTR1    |
| 0.475997678 | 0.169835769 | 1           | 0.126028 | 0.288503 | -0.01557 | DLS1    |
| 0.476044207 | 0.035103743 | 0.004415892 | -0.05288 | 0.173173 | -0.47976 | PYC1    |
| 0.476542875 | 0.08272612  | 0.328463464 | 0.079507 | 0.221852 | 0.336815 | AIM19   |
| 0.476542875 | 0.069544572 | 0.855814602 | -0.08624 | 0.248638 | -0.13266 | YLR152C |
| 0.476731956 | 0.019248218 | 1           | 0.186324 | -0.68085 | 0.039424 | BFA1    |
| 0.476897326 | 0.04054043  | 1           | -0.0649  | -0.20876 | 0.01538  | TRM44   |
| 0.477294277 | 0.157263376 | 1           | -0.08611 | 0.202375 | -0.00815 | VPS25   |
| 0.478167064 | 0.984718514 | 0.50705979  | -0.98779 | 0.152139 | 3.066841 | None    |
| 0.479637407 | 0.526283651 | 0.750952753 | -0.427   | 0.517241 | -0.89587 | None    |
| 0.479721748 | 0.170043734 | 0.91703897  | 0.057722 | -0.13353 | 0.067233 | CSE1    |
| 0.481633787 | 0.884827129 | 0.309689972 | 0.072967 | 0.030539 | 0.321241 | UBC9    |
| 0.485085949 | 0.149436038 | 1           | -0.06535 | -0.15911 | -0.02854 | UME6    |
| 0.485243358 | 0.379077824 | 1           | 0.080192 | 0.131444 | -0.03386 | ARP1    |
| 0.485368901 | 0.128036313 | 0.853162234 | 0.084924 | -0.21685 | 0.134738 | NDC80   |
| 0.485368901 | 0.103376814 | 0.906628341 | -0.05588 | -0.15038 | 0.069618 | GLO3    |
| 0.486308746 | 0.221596672 | 0.169011865 | -0.0529  | 0.112738 | 0.288603 | GSP1    |
| 0.487418991 | 0.844258179 | 0.721271027 | 0.714501 | 0.362957 | -1.67703 | None    |
| 0.487497358 | 0.533524502 | 0.66765157  | 0.073873 | 0.090629 | -0.19543 | YPR109W |
| 0.487497358 | 0.774294935 | 0.929303164 | 0.373639 | -0.25188 | -0.40692 | None    |
| 0.488889101 | 0.702542191 | 1           | -0.05445 | -0.04593 | -0.02778 | MGR1    |
| 0.489047626 | 0.052189123 | 0.664126703 | -0.06593 | -0.20724 | -0.17612 | GCN2    |
| 0.489718517 | 0.228877023 | 0.0166762   | -0.05311 | -0.11299 | 0.440807 | SYO1    |
| 0.489718517 | 0.613821587 | 0.733341705 | 0.051818 | -0.05472 | 0.117361 | XRN1    |
| 0.490054863 | 0.729751469 | 0.05801516  | 0.063661 | -0.05012 | -0.43492 | ISN1    |
| 0.491307807 | 0.231636316 | 1           | 0.131483 | 0.278516 | 0.030941 | GAL2    |
| 0.491899366 | 0.6101658   | 0.837446458 | -0.05907 | -0.0633  | -0.10036 | PET54   |

|              |              |              |           |           |           |                   |
|--------------|--------------|--------------|-----------|-----------|-----------|-------------------|
| 0. 491994764 | 0. 956605945 | 0. 855814602 | -0. 30744 | 0. 071909 | 0. 487953 | YML007C- <i>l</i> |
| 0. 492233828 | 0. 408627815 | 0. 509261048 | -0. 82411 | 1. 268771 | 2. 602117 | None              |
| 0. 492233828 | 0. 90728766  | 0. 93147427  | 0. 768235 | -0. 28052 | 0. 798472 | None              |
| 0. 492292545 | 0. 40987672  | 0. 512491836 | -0. 82784 | 1. 272281 | 2. 596834 | None              |
| 0. 495744043 | 0. 589846261 | 0. 344884088 | -0. 08808 | 0. 098689 | 0. 378156 | PHM8              |
| 0. 496029636 | 0. 904226858 | 0. 980342156 | 0. 087038 | -0. 0326  | -0. 06452 | PRK1              |
| 0. 496340018 | 0. 380470847 | 0. 241434728 | -0. 04623 | 0. 077138 | 0. 231045 | RPL13A            |
| 0. 497229314 | 0. 576193096 | 1            | 0. 058151 | -0. 06743 | -0. 02069 | VID27             |
| 0. 497509133 | 0. 914927286 | 0. 702041373 | 0. 758005 | -0. 26458 | -2. 01249 | None              |
| 0. 497662096 | 0. 740319156 | 0. 650488242 | 0. 063135 | 0. 048651 | -0. 17555 | SIT4              |
| 0. 497912483 | 0. 333401536 | 0. 789728487 | -0. 07282 | 0. 132071 | -0. 14348 | ECM38             |
| 0. 49792193  | 0. 98408428  | 0. 781709456 | -0. 08002 | -0. 01352 | -0. 16165 | OCA4              |
| 0. 498385565 | 0. 639003464 | 0. 661089241 | -0. 67111 | 0. 661135 | 1. 838776 | YLR302C           |
| 0. 49924073  | 0. 119202402 | 0. 28605422  | -0. 05561 | 0. 148277 | 0. 261058 | HMF1              |
| 0. 499530263 | 0. 071099424 | 1            | 0. 120944 | 0. 363923 | -0. 06984 | None              |
| 0. 499575292 | 0. 992842219 | 0. 717477893 | -0. 07278 | 0. 010157 | -0. 17471 | CHM7              |
| 0. 499747239 | 0. 413532829 | 0. 509146716 | -0. 0589  | 0. 09267  | -0. 20495 | ZWF1              |
| 0. 499821244 | 0. 490263266 | 1            | 0. 133711 | 0. 182791 | -0. 08088 | YNR071C           |
| 0. 500198864 | 0. 030733392 | 0. 05751254  | -0. 0475  | -0. 16738 | 0. 333175 | JIP5              |
| 0. 501592254 | 0. 140485465 | 0. 976568193 | 0. 066752 | -0. 17122 | 0. 052287 | RPB2              |
| 0. 502204793 | 0. 016934011 | 0. 936440675 | 0. 064428 | 0. 247962 | 0. 067786 | UGA2              |
| 0. 502248025 | 0. 068716276 | 0. 967394603 | 0. 047415 | -0. 14505 | 0. 041226 | LEO1              |
| 0. 502634231 | 0. 34806237  | 1            | 0. 294357 | 0. 525107 | 0. 012786 | SOR1              |
| 0. 502647828 | 0. 896286063 | 0. 143859218 | -0. 0819  | 0. 032601 | -0. 47858 | SGE1              |
| 0. 502683774 | 0. 276012403 | 0. 599344132 | -0. 06746 | 0. 136449 | -0. 20609 | XDJ1              |
| 0. 502987279 | 0. 98685381  | 0. 978193638 | 0. 056945 | -0. 00904 | -0. 04395 | MPD2              |
| 0. 502992517 | 0. 029454084 | 0. 058656331 | -0. 06177 | -0. 22093 | 0. 433351 | SGD1              |
| 0. 502992517 | 0. 515859901 | 0. 480256366 | -0. 06273 | 0. 082158 | -0. 22944 | IZH3              |
| 0. 502992517 | 0. 924812503 | 0. 828700369 | -0. 06686 | -0. 02191 | -0. 1199  | SWC3              |
| 0. 503033321 | 0. 997499519 | 0. 372814632 | 0. 137515 | -0. 01684 | 0. 582013 | SN01              |
| 0. 503728257 | 0. 986843508 | 0. 76367822  | -0. 06503 | 0. 010433 | -0. 1398  | TMS1              |
| 0. 504130959 | 0. 708957109 | 0. 726816534 | -0. 15724 | -0. 13491 | -0. 36984 | KRE29             |
| 0. 504130959 | 0. 91970774  | 1            | 0. 065073 | -0. 02219 | -0. 01047 | SKY1              |
| 0. 504536652 | 0. 692438881 | 0. 834791774 | -0. 10066 | 0. 0896   | 0. 177963 | MTG2              |
| 0. 50668448  | 0. 21659995  | 0. 935686072 | 0. 063596 | -0. 1431  | -0. 06802 | COG3              |
| 0. 507149555 | 0. 037277785 | 0. 873351716 | 0. 430608 | 1. 503453 | -0. 66383 | YLR307C- <i>l</i> |
| 0. 507778018 | 0. 068453606 | 0. 034137138 | -0. 0616  | 0. 189884 | 0. 481129 | RPS14A            |
| 0. 508773168 | 0. 086697129 | 0. 360662746 | -0. 04703 | -0. 13872 | 0. 203848 | PSE1              |
| 0. 509128945 | 0. 897122859 | 1            | 0. 04408  | 0. 017722 | -0. 01792 | LPD1              |
| 0. 509315747 | 0. 619450596 | 0. 020112784 | -0. 40491 | -0. 44243 | 3. 642459 | None              |
| 0. 510653352 | 0. 99176478  | 0. 688444366 | -0. 0632  | 0. 009134 | -0. 1682  | AIR1              |
| 0. 511144976 | 0. 593217132 | 0. 642194109 | 0. 096224 | 0. 110802 | -0. 27918 | ATG22             |
| 0. 511729057 | 0. 244947265 | 0. 8119342   | 0. 087968 | 0. 190457 | 0. 16796  | PCC1              |
| 0. 512392925 | 0. 659855933 | 1            | 0. 488995 | -0. 49624 | -0. 03803 | None              |
| 0. 512700749 | 0. 173085722 | 0. 04678456  | -0. 05662 | 0. 138534 | 0. 42403  | RPS17A            |
| 0. 513472573 | 0. 078816177 | 0. 919926509 | -0. 06459 | -0. 19715 | -0. 0786  | SLD3              |
| 0. 513759795 | 0. 659755235 | 0. 578113103 | 0. 063832 | -0. 06356 | -0. 2065  | YJR015W           |
| 0. 513983749 | 0. 498387456 | 0. 981444893 | 0. 05764  | -0. 08008 | 0. 043942 | UBX4              |
| 0. 514316181 | 0. 037225892 | 0. 384202197 | 0. 061121 | 0. 214418 | 0. 260327 | MHR1              |
| 0. 514316181 | 0. 801762915 | 0. 759037071 | 0. 094278 | -0. 06039 | -0. 20895 | APC5              |
| 0. 514316181 | 0. 413008972 | 1            | 0. 068583 | -0. 11206 | -0. 03157 | PSP2              |
| 0. 51455276  | 0. 368093975 | 0. 914525622 | 0. 086812 | -0. 15461 | -0. 11037 | POL2              |
| 0. 514757974 | 0. 735101186 | 1            | 0. 453755 | -0. 3755  | 0. 042549 | YLR415C           |
| 0. 516365716 | 0. 801762915 | 0. 229173368 | 0. 066995 | -0. 04305 | -0. 35439 | ARP6              |

|              |              |              |           |           |           |                   |
|--------------|--------------|--------------|-----------|-----------|-----------|-------------------|
| 0. 516396896 | 0. 056645029 | 0. 005737743 | 0. 07773  | 0. 253588 | 0. 755192 | HUB1              |
| 0. 516396896 | 0. 026675581 | 0. 611594186 | -0. 05353 | 0. 198902 | 0. 165398 | YDC1              |
| 0. 518455414 | 0. 173735431 | 0. 875200775 | -0. 05606 | -0. 13916 | -0. 08677 | TRE1              |
| 0. 518583784 | 0. 373168526 | 1            | -0. 06107 | -0. 10835 | 0. 004002 | FAT1              |
| 0. 519707704 | 0. 752103902 | 0. 932413507 | -0. 07946 | 0. 061947 | 0. 088261 | APS2              |
| 0. 520243555 | 0. 244947265 | 0. 04122541  | -0. 04952 | 0. 109001 | 0. 386928 | RPS18A            |
| 0. 520560166 | 0. 291582782 | 0. 251754292 | 0. 054597 | -0. 11203 | 0. 282999 | YBT1              |
| 0. 520666803 | 0. 502826515 | 0. 967394603 | 0. 095406 | -0. 13329 | 0. 086615 | SCC2              |
| 0. 520912403 | 0. 294101962 | 1            | -0. 0827  | 0. 168377 | -0. 0332  | IFM1              |
| 0. 521779325 | 0. 159515372 | 0. 939670905 | -0. 05974 | -0. 15347 | -0. 06394 | OTU2              |
| 0. 522657547 | 0. 086191139 | 0. 589775129 | -0. 06583 | -0. 20038 | -0. 21311 | SNF12             |
| 0. 522845521 | 0. 177112688 | 0. 049980756 | 0. 068023 | 0. 168951 | 0. 51406  | YLR264C- <i>l</i> |
| 0. 523526599 | 0. 970013423 | 1            | -0. 08828 | 0. 019265 | -0. 03554 | DDC1              |
| 0. 524229461 | 0. 301940839 | 0. 974194652 | 0. 071055 | 0. 143561 | 0. 060153 | YFH1              |
| 0. 524333434 | 0. 782040669 | 0. 581268517 | -0. 06295 | 0. 04387  | -0. 20688 | RKM3              |
| 0. 524421535 | 0. 770350536 | 0. 8103699   | -0. 09851 | 0. 0713   | -0. 19364 | HIT1              |
| 0. 524421535 | 0. 302395299 | 0. 891706446 | 0. 072629 | -0. 14714 | -0. 10552 | YOR296W           |
| 0. 524421535 | 0. 686382379 | 0. 894445004 | 0. 061157 | 0. 05786  | 0. 087975 | MTM1              |
| 0. 524714069 | 0. 032364503 | 0. 488692236 | -0. 05908 | -0. 21754 | -0. 22357 | CLB1              |
| 0. 525601275 | 0. 532413738 | 0. 430673089 | -0. 04288 | -0. 05712 | 0. 175799 | YKL077W           |
| 0. 527038068 | 0. 026560847 | 0. 919516515 | -0. 12517 | 0. 473546 | -0. 15704 | YNR068C           |
| 0. 527038068 | 0. 244648183 | 1            | 0. 382046 | -0. 89753 | -0. 23796 | CDA2              |
| 0. 527174331 | 0. 034211322 | 0. 871066692 | -0. 07488 | -0. 2745  | 0. 120085 | MSB1              |
| 0. 527375747 | 0. 439543123 | 0. 616944383 | -0. 06326 | 0. 100922 | -0. 19787 | PXP1              |
| 0. 527395953 | 0. 672577856 | 0. 427445927 | 0. 066638 | 0. 065587 | -0. 2745  | PXP2              |
| 0. 527471593 | 0. 076685215 | 0. 163693857 | -0. 06576 | -0. 20813 | -0. 39581 | ZAP1              |
| 0. 527471593 | 0. 950105874 | 1            | -0. 06295 | -0. 01721 | 0. 015419 | ATM1              |
| 0. 527707188 | 0. 411661642 | 0. 326601143 | -0. 04429 | -0. 07456 | 0. 209159 | NSA1              |
| 0. 527998669 | 0. 666318943 | 0. 550542595 | 0. 358464 | 0. 359983 | -1. 26754 | YGR045C           |
| 0. 528193277 | 0. 014044723 | 1            | 0. 057837 | -0. 24189 | -0. 00275 | RIA1              |
| 0. 528321512 | 0. 347703031 | 0. 189220839 | 0. 428972 | -0. 84115 | 2. 719505 | None              |
| 0. 528411916 | 0. 953371228 | 0. 291391691 | 0. 043469 | -0. 01157 | 0. 215469 | RPA34             |
| 0. 52925952  | 0. 649028901 | 0. 901225243 | -0. 47496 | 0. 492613 | 0. 662839 | YGR204C- <i>l</i> |
| 0. 529482281 | 0. 690335313 | 0. 134903876 | 0. 107317 | -0. 10213 | -0. 67528 | AZR1              |
| 0. 530536581 | 0. 836107259 | 0. 929344228 | 0. 082628 | 0. 048092 | -0. 09719 | MDM12             |
| 0. 530707539 | 0. 305821205 | 0. 104201741 | -0. 05024 | 0. 102089 | 0. 335844 | RPL17B            |
| 0. 530707539 | 1            | 0. 522788552 | 0. 107193 | -0. 01133 | -0. 39231 | GRX6              |
| 0. 530707539 | 0. 664002974 | 1            | -0. 20596 | 0. 208282 | 0. 047582 | THI11             |
| 0. 530930288 | 0. 905759808 | 0. 786584362 | 0. 070037 | 0. 027768 | 0. 149955 | UGO1              |
| 0. 530957435 | 0. 761254812 | 0. 533231335 | -0. 07754 | 0. 059379 | -0. 27909 | MNE1              |
| 0. 531338476 | 0. 953675948 | 0. 001009254 | 0. 493774 | -0. 13381 | -8. 18439 | None              |
| 0. 531338476 | 0. 352451342 | 0. 795907717 | -0. 10928 | 0. 205818 | 0. 227646 | TPP1              |
| 0. 531338476 | 0. 203043786 | 0. 7990478   | 0. 054644 | -0. 13275 | -0. 11308 | PRP19             |
| 0. 532916128 | 0. 011080935 | 0. 243549962 | 0. 053043 | -0. 23168 | 0. 286017 | PUF6              |
| 0. 533240644 | 1            | 0. 670294084 | 0. 063669 | -0. 00035 | -0. 184   | DCK1              |
| 0. 533575185 | 0. 066848063 | 0. 287597168 | 0. 044061 | -0. 14498 | 0. 22223  | DBP3              |
| 0. 534464761 | 3. 50087E-05 | 0. 060744575 | -0. 07201 | 0. 456519 | 0. 535709 | CMC2              |
| 0. 534464761 | 0. 699522343 | 0. 531076067 | -0. 06641 | -0. 06221 | 0. 242537 | RKM2              |
| 0. 534464761 | 0. 938960046 | 0. 595547517 | 0. 063702 | -0. 01974 | -0. 21006 | YER034W           |
| 0. 534464761 | 0. 488044682 | 0. 737914729 | -0. 87988 | 1. 275108 | 1. 474398 | None              |
| 0. 534464761 | 0. 033587112 | 0. 960632458 | -0. 0599  | -0. 22428 | -0. 05936 | FKH2              |
| 0. 534519899 | 0. 206109048 | 0. 960632458 | 0. 079139 | -0. 193   | 0. 078684 | JJJ2              |
| 0. 53461092  | 0. 914594311 | 0. 853662564 | 0. 049422 | 0. 018617 | -0. 0866  | VPS17             |
| 0. 534681612 | 0. 913339726 | 0. 553808105 | 0. 062194 | 0. 023786 | -0. 21908 | PHO23             |

|              |              |              |           |           |           |                   |
|--------------|--------------|--------------|-----------|-----------|-----------|-------------------|
| 0. 534681612 | 0. 947996628 | 0. 721271027 | 0. 046803 | -0. 01332 | 0. 120151 | YBL036C           |
| 0. 535474954 | 0. 012929362 | 0. 324676992 | -0. 04472 | -0. 19186 | 0. 215997 | PRP43             |
| 0. 536166342 | 0. 64001431  | 0. 763322262 | 0. 903065 | 0. 986962 | -1. 42851 | None              |
| 0. 536258728 | 0. 72522855  | 1            | -0. 04659 | -0. 04093 | 0. 015725 | NDC1              |
| 0. 536270845 | 0. 001731932 | 0. 889649609 | 0. 054687 | 0. 281855 | 0. 082848 | RFS1              |
| 0. 536893486 | 0. 767134842 | 1            | 0. 055084 | -0. 04202 | -0. 0111  | JNM1              |
| 0. 537486022 | 0. 292062644 | 1            | 0. 0478   | -0. 10199 | -0. 00585 | STP1              |
| 0. 537947655 | 0. 393729423 | 0. 390918    | -0. 04739 | -0. 0844  | 0. 210651 | LSG1              |
| 0. 537947655 | 0. 62447311  | 1            | -0. 06239 | -0. 07117 | 0. 030856 | TRA1              |
| 0. 538245334 | 0. 120557166 | 1            | 0. 0871   | 0. 252223 | -0. 03779 | MRX10             |
| 0. 538655118 | 0. 998764461 | 0. 795907717 | -0. 06731 | 0. 008605 | -0. 14257 | OCT1              |
| 0. 538831903 | 0. 368966584 | 0. 96218812  | -0. 07592 | -0. 14211 | 0. 074795 | CCH1              |
| 0. 539284195 | 0. 157263376 | 0. 392456706 | 0. 074645 | 0. 200142 | -0. 33068 | NAS2              |
| 0. 539480082 | 0. 209645547 | 0. 46824606  | -0. 07863 | -0. 19225 | -0. 31694 | MGS1              |
| 0. 539709969 | 0. 644005887 | 0. 169547502 | 0. 120354 | 0. 131657 | -0. 73174 | GAL1              |
| 0. 540817618 | 0. 697051685 | 0. 516783348 | 0. 051667 | 0. 049399 | -0. 19529 | NBP2              |
| 0. 541865468 | 0. 509639659 | 0. 826681282 | -0. 16773 | 0. 241122 | 0. 327661 | None              |
| 0. 542299611 | 0. 338644692 | 0. 927131674 | -0. 04203 | -0. 08342 | 0. 052367 | GAS3              |
| 0. 542656145 | 0. 210530389 | 0. 804576171 | -0. 16941 | 0. 412105 | 0. 350723 | None              |
| 0. 543010303 | 0. 432562651 | 1            | -0. 06424 | -0. 10789 | 0. 026216 | PRI2              |
| 0. 544414711 | 0. 413242794 | 0. 967394603 | -0. 0769  | -0. 13403 | 0. 073827 | CTR86             |
| 0. 544972843 | 0. 516700017 | 0. 915496392 | 0. 047016 | -0. 06752 | 0. 063785 | APL6              |
| 0. 546328707 | 0. 649028901 | 0. 244196805 | 0. 883782 | 0. 966338 | 5. 049419 | None              |
| 0. 546328707 | 0. 649028901 | 0. 244196805 | 0. 883793 | 0. 96635  | 5. 049409 | YHL048C- <i>l</i> |
| 0. 547617971 | 0. 492472465 | 0. 283481217 | -0. 85642 | 1. 267248 | -5. 06077 | LSM5              |
| 0. 547617971 | 0. 995362426 | 0. 314397572 | 0. 226519 | -0. 03342 | 1. 141258 | None              |
| 0. 547617971 | 0. 123945381 | 0. 971609311 | -0. 20543 | 0. 596651 | -0. 18899 | YER145C- <i>l</i> |
| 0. 547714567 | 0. 914594311 | 0. 874977083 | -0. 20917 | -0. 08085 | -0. 35033 | SBH1              |
| 0. 547949735 | 0. 879819172 | 0. 417425061 | 0. 07403  | -0. 03685 | 0. 32456  | FAU1              |
| 0. 547949735 | 1            | 0. 449106932 | 0. 066799 | -0. 00134 | -0. 28066 | FIN1              |
| 0. 548934097 | 0. 551291677 | 0. 260671162 | 0. 67862  | -0. 96929 | -4. 62219 | None              |
| 0. 549085447 | 0. 840784015 | 0. 98198617  | -0. 437   | 0. 255565 | -0. 36486 | YKL096C- <i>l</i> |
| 0. 54932565  | 0. 821809527 | 0. 545272974 | 0. 04697  | 0. 030257 | 0. 173478 | VMA7              |
| 0. 549860136 | 0. 730766871 | 0. 888371569 | 0. 076045 | 0. 067708 | -0. 1201  | NTG2              |
| 0. 549926445 | 0. 495058536 | 0. 283481217 | -0. 85011 | 1. 260824 | -5. 05603 | YGL235W           |
| 0. 550075979 | 0. 76984172  | 0. 960632458 | 0. 453638 | 0. 3507   | -0. 45962 | None              |
| 0. 550341201 | 0. 10529773  | 0. 793556588 | 0. 169731 | 0. 520834 | 0. 371248 | YCR001W           |
| 0. 550531973 | 0. 006875897 | 0. 376271085 | 0. 047107 | 0. 223783 | 0. 21974  | CDC42             |
| 0. 551333047 | 0. 077765835 | 0. 322465729 | -0. 05331 | 0. 176739 | 0. 267534 | HYR1              |
| 0. 551333047 | 0. 980604983 | 0. 571709772 | -0. 23513 | 0. 047087 | -0. 83793 | YMR182W- <i>l</i> |
| 0. 551662896 | 0. 292344093 | 0. 53398283  | 0. 076866 | -0. 16933 | 0. 290812 | MPL1              |
| 0. 551989592 | 0. 986843508 | 0. 474290885 | -0. 08264 | -0. 01467 | 0. 340834 | GEP4              |
| 0. 552339526 | 0. 461111981 | 0. 620580042 | -0. 17167 | 0. 277807 | 0. 564978 | None              |
| 0. 553467571 | 0. 497819776 | 0. 283510967 | -0. 84556 | 1. 258023 | -5. 05581 | None              |
| 0. 5536759   | 0. 120709475 | 0. 818523526 | -0. 22883 | 0. 678553 | -0. 46708 | YER039C- <i>l</i> |
| 0. 55375023  | 0. 767459399 | 0. 82890057  | -0. 65251 | 0. 500616 | 1. 270882 | None              |
| 0. 554602969 | 0. 147942384 | 0. 67702211  | 0. 054166 | -0. 15402 | 0. 162732 | POL32             |
| 0. 556017272 | 1            | 0. 643429399 | 0. 540394 | -0. 02295 | -1. 80008 | None              |
| 0. 556154439 | 0. 00286728  | 0. 053817845 | 0. 124074 | 0. 64186  | -0. 99235 | YMR315W- <i>l</i> |
| 0. 55617172  | 0. 129797843 | 0. 961702496 | 0. 072918 | 0. 214987 | -0. 0749  | YSP3              |
| 0. 556341515 | 0. 317595659 | 1            | 0. 058109 | -0. 12359 | 0. 009645 | YPK9              |
| 0. 556416854 | 0. 019388398 | 0. 409896537 | 0. 091599 | -0. 39325 | 0. 414947 | YSP2              |
| 0. 557411158 | 0. 958689082 | 1            | 0. 053499 | -0. 01425 | 0. 016357 | YRB30             |
| 0. 557716924 | 0. 351406863 | 0. 077555297 | -0. 05179 | 0. 103823 | 0. 388635 | RPL16B            |

|             |             |             |          |          |          |           |
|-------------|-------------|-------------|----------|----------|----------|-----------|
| 0.557726174 | 0.000922362 | 0.89915479  | 0.093692 | 0.527855 | -0.14202 | YCR007C   |
| 0.558003108 | 0.134186983 | 1           | -0.05563 | 0.163206 | 0.035729 | FSH2      |
| 0.558040147 | 0.72990982  | 1           | 0.380599 | 0.346861 | 0.199594 | None      |
| 0.559434356 | 0.795533688 | 0.715024856 | 0.10167  | 0.073477 | -0.28063 | RIF2      |
| 0.559789109 | 0.095354954 | 0.930835922 | 0.22946  | 0.739051 | -0.28355 | None      |
| 0.560377698 | 0.795674553 | 0.76367822  | -0.10137 | 0.073135 | -0.24712 | YOR012W   |
| 0.560470993 | 0.996753756 | 0.803017727 | -0.35514 | 0.051813 | -0.78673 | UTR5      |
| 0.560681063 | 0.527104557 | 1           | -0.05884 | 0.085673 | -0.03545 | RGT1      |
| 0.561486378 | 0.117458174 | 0.002316113 | -0.05451 | 0.167535 | 0.628261 | RPS21B    |
| 0.561769545 | 0.158486798 | 1           | 0.054042 | -0.15258 | -0.00441 | RSC3      |
| 0.561803908 | 0.650079178 | 0.835951015 | -0.03963 | 0.044857 | -0.07897 | FUM1      |
| 0.561841785 | 0.582123297 | 1           | -0.23218 | -0.30758 | 0.066058 | PHM6      |
| 0.562636301 | 0.57019157  | 0.354608469 | -0.09639 | -0.13069 | 0.475822 | YNR062C   |
| 0.562636301 | 0.681412538 | 1           | -0.12634 | -0.13203 | -0.00073 | YDL109C   |
| 0.563136508 | 0.302233138 | 0.906628341 | 0.073395 | -0.16293 | -0.10881 | PAC2      |
| 0.563420111 | 0.072550807 | 0.019841876 | 0.039338 | -0.13657 | 0.375647 | NOP12     |
| 0.563420111 | 0.083210455 | 0.778620065 | -0.06019 | -0.20282 | -0.14212 | SPT23     |
| 0.563420111 | 0.591976174 | 1           | 0.068189 | -0.08882 | -0.04449 | RTT101    |
| 0.564009704 | 0.109990533 | 0.467794221 | 0.682283 | 2.286737 | 3.244976 | SOR2      |
| 0.564056024 | 0.690335313 | 0.262959237 | 0.041091 | -0.04217 | -0.23054 | CPR4      |
| 0.56547394  | 0.341978326 | 0.488692236 | -0.05449 | 0.113154 | 0.22662  | CPR8      |
| 0.565629959 | 0.753846794 | 0.606574034 | -0.72552 | -0.62414 | -2.65226 | None      |
| 0.566374356 | 0.642965493 | 0.962371769 | -0.06484 | -0.07554 | -0.06762 | CHK1      |
| 0.566882449 | 0.75339767  | 0.847404354 | -0.29597 | -0.25641 | -0.58611 | YFR054C   |
| 0.567720361 | 0.84041532  | 0.985483713 | 0.088528 | -0.05515 | 0.071657 | ZIP1      |
| 0.571231463 | 0.899105948 | 0.908303081 | 0.062932 | -0.02868 | -0.09337 | DEP1      |
| 0.571621418 | 0.937034346 | 0.910199402 | -0.35425 | -0.12099 | -0.5184  | YKR041W   |
| 0.571675279 | 0.996223442 | 1           | 0.079945 | -0.01201 | 0.008977 | UBP7      |
| 0.571736929 | 2.46025E-07 | 0.392569813 | -0.04145 | 0.342508 | -0.19736 | GSY2      |
| 0.572296378 | 0.248973593 | 0.417425061 | 0.36162  | -0.93558 | 1.811508 | YFL012W   |
| 0.57314424  | 0.887970391 | 1           | 0.128681 | -0.06372 | -0.08264 | PET122    |
| 0.573493176 | 0.027221239 | 1           | -0.09924 | -0.42117 | -0.02152 | KCC4      |
| 0.573678225 | 0.727504645 | 0.469733538 | 0.06375  | -0.0607  | 0.277865 | ISC10     |
| 0.573878524 | 0.012650856 | 0.420929331 | 0.063716 | -0.30017 | -0.29459 | INM1      |
| 0.574155754 | 1           | 0.768164938 | 0.084991 | 0.000251 | -0.21116 | YEF1      |
| 0.574239333 | 0.776534414 | 0.721655021 | -0.57991 | -0.46345 | 1.683126 | YBL008W-1 |
| 0.575798985 | 0.430199039 | 0.995979951 | 0.052103 | 0.094507 | -0.03917 | GUP1      |
| 0.576109932 | 0.886858489 | 0.865649648 | -0.05228 | -0.02626 | 0.096177 | BCH1      |
| 0.576460228 | 0.569517503 | 0.0204694   | -0.06315 | -0.08838 | -0.61176 | MET16     |
| 0.577089404 | 0.271203734 | 1           | -0.07826 | 0.187834 | 0.033297 | YFT2      |
| 0.577906824 | 0.759288226 | 0.927963214 | 0.07522  | -0.06523 | -0.10025 | LIN1      |
| 0.577906824 | 0.147268515 | 1           | 0.056462 | -0.16958 | 0.003113 | PEF1      |
| 0.577960652 | 0.6500985   | 0.795907717 | 0.118784 | -0.14    | -0.27475 | APC1      |
| 0.577960652 | 0.458954168 | 0.885657987 | -0.07153 | -0.12403 | 0.121879 | SLS1      |
| 0.577960652 | 0.418014035 | 1           | 0.454995 | -0.88691 | -0.02135 | None      |
| 0.578248926 | 0.066144657 | 1           | -0.0491  | -0.1794  | 0.00734  | PDC2      |
| 0.578508786 | 0.963282012 | 0.756233899 | -0.04483 | -0.01204 | 0.115755 | GYP6      |
| 0.579385264 | 0.139339573 | 0.4591411   | -0.3406  | 1.033021 | 1.563476 | None      |
| 0.579934419 | 0.601019912 | 0.709422392 | -0.10473 | -0.13883 | -0.30983 | AMF1      |
| 0.579934419 | 1           | 1           | -0.07634 | -0.00014 | 0.001599 | DIA2      |
| 0.580022237 | 0.342998394 | 0.327518381 | -0.28279 | -0.61973 | -1.66977 | None      |
| 0.580511194 | 0.102364988 | 0.859694751 | -0.03621 | 0.120169 | 0.069256 | SSC1      |
| 0.580511194 | 0.177202487 | 0.986500461 | -0.07017 | -0.1996  | 0.057992 | SMC6      |
| 0.580599599 | 0.562441257 | 0.736378884 | 0.05407  | 0.077735 | 0.148048 | NSE3      |



|             |             |             |          |          |          |            |
|-------------|-------------|-------------|----------|----------|----------|------------|
| 0.581230398 | 0.803401992 | 1           | 0.064906 | 0.047985 | 0.006141 | BRR1       |
| 0.581506743 | 0.247677793 | 0.706865475 | -0.04121 | -0.10432 | -0.12316 | CAB1       |
| 0.581752889 | 0.105961984 | 1           | -0.05167 | -0.17119 | -0.02638 | ANY1       |
| 0.582846811 | 0.174275989 | 0.62830703  | 0.176525 | 0.505344 | 0.61309  | None       |
| 0.582874661 | 0.334055071 | 0.374918009 | 0.577659 | -1.37441 | 3.233588 | None       |
| 0.583976802 | 0.839064323 | 0.971609311 | -0.05852 | 0.037948 | -0.05826 | RTR1       |
| 0.584030791 | 0.916930597 | 1           | -0.06084 | -0.02518 | -0.0104  | UIP5       |
| 0.584324089 | 0.261323518 | 0.721655021 | 0.06642  | -0.16632 | 0.190762 | SWI4       |
| 0.585232386 | 0.576536639 | 1           | 0.058677 | 0.08265  | 0.032677 | MED4       |
| 0.58645242  | 0.582169769 | 0.38020077  | -0.06653 | -0.09297 | 0.334935 | PRP6       |
| 0.586588517 | 0.923003688 | 0.563376575 | 0.109174 | -0.04383 | -0.42622 | IPL1       |
| 0.589712541 | 0.080514417 | 1           | 0.085812 | -0.31014 | 0.018366 | CIN8       |
| 0.590175767 | 0.672129195 | 0.715052519 | -0.48928 | 0.547816 | -1.47205 | YHL041W    |
| 0.59039372  | 0.308657113 | 0.05005618  | -0.05304 | 0.123062 | 0.466358 | RPP2A      |
| 0.590441377 | 0.801071005 | 0.498286841 | -0.05444 | -0.04148 | 0.236481 | AMD1       |
| 0.590594263 | 0.885748557 | 0.868031723 | -0.47849 | 0.246495 | -0.93094 | None       |
| 0.590610744 | 0.374954065 | 1           | 0.249358 | 0.518303 | 0.169555 | None       |
| 0.592039119 | 0.210094783 | 0.985468267 | 0.04962  | -0.13668 | 0.042538 | RXT2       |
| 0.593209897 | 0.864979821 | 1           | 0.038986 | -0.02298 | -0.00725 | VPS4       |
| 0.593255291 | 0.981445908 | 0.711541955 | -0.24297 | 0.052574 | 0.733635 | YPL062W    |
| 0.594467072 | 1           | 0.908303081 | -0.55167 | 0.003317 | 0.865215 | None       |
| 0.594978226 | 0.267599743 | 0.780776603 | -0.07072 | -0.17889 | 0.17903  | YPR097W    |
| 0.595860186 | 0.288638452 | 0.939670905 | 0.040001 | -0.09803 | 0.05075  | SRP1       |
| 0.595921787 | 1           | 0.538130573 | 0.342633 | 0.022509 | -1.45958 | None       |
| 0.597075672 | 0.060869744 | 0.940027863 | -0.05191 | -0.20112 | -0.06595 | MAK10      |
| 0.597895363 | 0.440961232 | 0.87712194  | -0.05199 | -0.09747 | -0.09502 | SPC34      |
| 0.598046417 | 0.102498598 | 0.00882836  | 0.044999 | -0.15599 | 0.507417 | RNT1       |
| 0.599589804 | 0.219208972 | 0.054532226 | -0.0452  | 0.12424  | 0.400161 | RPS16B     |
| 0.600621868 | 0.136055875 | 0.214654991 | 0.458373 | -1.64912 | -4.38778 | YBR221W-/- |
| 0.600621868 | 0.630291514 | 0.290004916 | -0.2682  | -0.3503  | -1.6664  | YGR025W    |
| 0.600621868 | 0.887970391 | 0.392569813 | -0.47875 | 0.249101 | -2.6682  | None       |
| 0.600621868 | 0.640183171 | 0.87973401  | -0.03917 | -0.04962 | -0.07135 | MCM1       |
| 0.60121504  | 0.333037056 | 0.027801813 | -0.04305 | 0.098581 | 0.427719 | RPL19A     |
| 0.60121504  | 0.600998428 | 0.255041627 | 0.045091 | -0.06283 | 0.2799   | SKI6       |
| 0.602072258 | 0.678241823 | 0.969393262 | 0.058015 | 0.066927 | 0.062192 | YNL193W    |
| 0.602072258 | 0.542558974 | 1           | -0.04465 | -0.06968 | -0.0208  | CIA1       |
| 0.602206972 | 0.087715023 | 0.442948909 | -0.06543 | -0.23833 | -0.31374 | ABF1       |
| 0.602669182 | 0.089703965 | 0.132432156 | 0.059012 | -0.21432 | 0.443287 | URB1       |
| 0.603255153 | 1           | 1           | 0.039198 | 0.001263 | 0.002279 | BMH2       |
| 0.604550161 | 0.266387962 | 0.174129588 | 0.068534 | -0.17841 | 0.484191 | YHL012W    |
| 0.604550161 | 0.216242824 | 0.449495496 | -0.1905  | 0.528408 | -0.91807 | SMD1       |
| 0.604936031 | 0.681411432 | 0.484106841 | 0.68473  | 0.79145  | -3.02237 | None       |
| 0.60508287  | 0.672129195 | 0.031420916 | -0.04362 | 0.051445 | -0.4277  | YDR061W    |
| 0.605614275 | 0.141633165 | 0.043873822 | -0.0421  | 0.13577  | 0.394325 | VMA11      |
| 0.605614275 | 0.113318165 | 1           | 0.088399 | 0.303696 | 0.046088 | DAL3       |
| 0.605812555 | 0.418773131 | 0.186752472 | 0.543978 | 1.088264 | -4.27239 | YDR034C-/- |
| 0.606022823 | 0.836107259 | 0.415327459 | -0.04675 | 0.032294 | 0.235137 | LIP1       |
| 0.606022823 | 0.013981458 | 0.564685666 | 0.061029 | -0.3061  | 0.249918 | NUP133     |
| 0.606251566 | 0.899541977 | 0.659038749 | 0.766815 | -0.38146 | 2.36718  | None       |
| 0.606279745 | 0.013622527 | 0.780208648 | 0.055387 | -0.27892 | 0.144641 | ECM16      |
| 0.606317327 | 0.392406899 | 1           | 0.569568 | 1.200001 | -0.2569  | None       |
| 0.606814858 | 0.925411578 | 0.580281763 | 0.063738 | 0.026288 | -0.25432 | SCC4       |
| 0.606881211 | 0.178518827 | 0.516090954 | 0.390216 | 1.186999 | 1.786496 | YJR079W    |
| 0.608773858 | 1           | 1           | -0.07251 | -0.00584 | 0.01394  | PUS6       |

|              |              |              |           |           |           |                      |
|--------------|--------------|--------------|-----------|-----------|-----------|----------------------|
| 0. 608862465 | 0. 447812948 | 0. 629134428 | -0. 57622 | 1. 07888  | -2. 32254 | None                 |
| 0. 609201776 | 0. 713873054 | 0. 050546852 | -0. 06752 | -0. 07252 | -0. 61323 | MUP1                 |
| 0. 609513534 | 0. 703379547 | 0. 984628847 | 0. 045684 | -0. 05049 | -0. 04223 | TRS31                |
| 0. 609687446 | 0. 71920823  | 0. 545272974 | 0. 060905 | -0. 06456 | -0. 2589  | ELA1                 |
| 0. 609736539 | 0. 506234402 | 0. 971609311 | -0. 08423 | 0. 14312  | -0. 08871 | DPB3                 |
| 0. 609935071 | 0. 418773131 |              | 1         | -0. 2192  | 0. 435856 | -0. 074 None         |
| 0. 611275552 | 0. 990425307 | 0. 069148732 | -0. 04156 | -0. 00776 | 0. 361648 | RRS1                 |
| 0. 611904371 | 0. 440961232 |              | 1         | 0. 134926 | 0. 26133  | -0. 02714 None       |
| 0. 612281358 | 0. 317595659 | 0. 870558299 | -0. 04611 | 0. 11142  | 0. 090422 | HNT1                 |
| 0. 612845486 | 0. 905759808 | 0. 343265986 | 0. 75524  | -0. 36779 | -4. 53019 | YFL068W              |
| 0. 613224957 | 0. 434712398 | 0. 179756965 | -0. 03459 | -0. 06821 | 0. 247419 | RPC40                |
| 0. 613224957 | 0. 905759808 | 0. 343092466 | 0. 753475 | -0. 36594 | -4. 53493 | None                 |
| 0. 613224957 | 0. 905759808 | 0. 343265986 | 0. 753661 | -0. 36628 | -4. 52763 | None                 |
| 0. 613224957 | 0. 905759808 | 0. 343265986 | 0. 75365  | -0. 36625 | -4. 52759 | None                 |
| 0. 613992445 | 0. 012650856 | 0. 563376575 | 0. 051549 | -0. 26744 | 0. 216105 | POL12                |
| 0. 615720635 | 0. 515000941 | 0. 068005273 | -0. 05668 | -0. 09653 | -0. 4989  | GPC1                 |
| 0. 618802039 | 0. 601388298 | 0. 011257238 | 0. 034921 | -0. 05072 | 0. 40372  | PWP1                 |
| 0. 618802039 | 0. 895557583 | 0. 094839053 | 0. 049111 | -0. 02572 | -0. 40939 | LAM5                 |
| 0. 618802039 | 6. 96957E-05 | 0. 166524458 | -0. 05808 | 0. 434569 | -0. 42682 | SKS1                 |
| 0. 619880672 | 0. 996805372 | 0. 943092469 | -0. 0566  | -0. 00929 | 0. 074862 | BUD16                |
| 0. 621748226 | 0. 025132758 | 0. 254956962 | 0. 237224 | -1. 17717 | -1. 63669 | PH092                |
| 0. 6225016   | 0. 984860432 | 0. 688444366 | 0. 061256 | -0. 01357 | -0. 21149 | MLH3                 |
| 0. 622792818 | 0. 044150726 | 0. 52960144  | -0. 03702 | -0. 16254 | -0. 16611 | AVT1                 |
| 0. 622813356 | 0. 83092898  | 0. 477655526 | 0. 057524 | 0. 042493 | -0. 27817 | ASI1                 |
| 0. 622813356 | 1            | 0. 661089241 | -0. 04557 | 0. 005467 | 0. 166102 | VBA1                 |
| 0. 624562771 | 0. 712206218 | 0. 785906893 | -0. 04986 | 0. 055827 | -0. 13319 | HAT1                 |
| 0. 62528464  | 0. 995096172 | 0. 846934431 | -0. 04715 | 0. 008446 | -0. 10464 | CDC123               |
| 0. 626062012 | 0. 858991565 | 0. 181954717 | -0. 04533 | 0. 029698 | 0. 332566 | RSM23                |
| 0. 626062012 | 0. 472952463 | 0. 483628979 | -0. 05656 | 0. 106735 | 0. 273959 | PKR1                 |
| 0. 629659097 | 0. 615223063 | 0. 733341705 | -0. 05329 | 0. 076733 | 0. 165522 | RFA3                 |
| 0. 630441947 | 0. 717419826 | 0. 744376434 | -0. 04164 | -0. 04641 | 0. 125029 | SRP21                |
| 0. 630514216 | 0. 207905497 | 0. 522217116 | 0. 044355 | -0. 13454 | 0. 206051 | MTR10                |
| 0. 631111413 | 0. 963551031 | 0. 84419011  | -0. 20263 | -0. 06123 | -0. 46384 | YLR236C              |
| 0. 631295727 | 0. 533524502 | 0. 563376575 | 0. 061071 | -0. 10412 | -0. 26546 | SLX4                 |
| 0. 631295727 | 0. 514937661 |              | 1         | -0. 04883 | 0. 086041 | 0. 026657 MST1       |
| 0. 631439544 | 0. 030006572 |              | 1         | 0. 565663 | -3. 471   | -0. 61013 None       |
| 0. 632080012 | 0. 199387279 |              | 1         | -0. 73053 | -2. 3737  | 0. 848841 None       |
| 0. 632837052 | 0. 299260429 | 0. 006151828 | 0. 068592 | 0. 179533 | -0. 85998 | ATH1                 |
| 0. 633560024 | 0. 199496245 |              | 1         | -0. 72615 | -2. 3703  | 0. 843439 None       |
| 0. 634377185 | 0. 53992737  | 0. 92745323  | -0. 27703 | -0. 47335 | -0. 43433 | YBR056W-/-           |
| 0. 634872148 | 0. 304299791 | 0. 636815206 | 0. 051227 | -0. 13389 | -0. 2     | YKL075C              |
| 0. 635896584 | 0. 703189392 |              | 1         | 0. 573386 | 0. 673475 | -0. 28618 YAL067W-/- |
| 0. 636176874 | 0. 037207475 | 0. 90423793  | -0. 0469  | -0. 21916 | 0. 084118 | YEL043W              |
| 0. 636397143 | 0. 895141735 | 0. 133400488 | 0. 040082 | 0. 02192  | 0. 326138 | RPS8A                |
| 0. 636462725 | 0. 042062145 | 0. 228471317 | 0. 052137 | 0. 23755  | 0. 366826 | RPP0                 |
| 0. 636462725 | 0. 317595659 |              | 1         | 0. 045316 | -0. 11653 | -0. 01826 COG1       |
| 0. 636474096 | 0. 982105623 | 0. 981786205 | -0. 05262 | -0. 01257 | -0. 05309 | YND1                 |
| 0. 636474096 | 0. 199728633 |              | 1         | -0. 71893 | -2. 36577 | 0. 835232 YGR018C    |
| 0. 636748222 | 0. 759694936 | 0. 272261717 | -0. 05943 | -0. 05903 | -0. 39126 | NPR2                 |
| 0. 637053807 | 0. 152890044 | 0. 440092898 | 0. 081624 | 0. 278108 | -0. 42757 | GUD1                 |
| 0. 637164266 | 0. 782318684 | 0. 441720189 | 0. 039262 | 0. 035645 | 0. 206698 | TNA1                 |
| 0. 637164266 | 0. 883064096 | 0. 906020326 | 0. 034132 | 0. 020589 | -0. 06043 | AR08                 |
| 0. 638389463 | 0. 031788614 |              | 1         | 0. 561223 | -3. 45247 | -0. 60643 None       |
| 0. 638964313 | 0. 892236467 | 0. 198116982 | 0. 042196 | -0. 02378 | 0. 312773 | RRP15                |

|              |              |              |           |           |           |                   |
|--------------|--------------|--------------|-----------|-----------|-----------|-------------------|
| 0. 639181218 | 0. 813293705 | 0. 694076825 | -0. 08255 | 0. 067757 | -0. 2931  | YGR240C- <i>l</i> |
| 0. 639181218 | 0. 703643853 | 1            | -0. 2482  | 0. 292186 | 0. 166149 | None              |
| 0. 639658527 | 0. 846089519 | 0. 941464384 | 0. 041486 | -0. 02982 | -0. 05809 | SLT2              |
| 0. 640042343 | 0. 361894148 | 0. 608460014 | -0. 06775 | 0. 162656 | -0. 28046 | UBC5              |
| 0. 640042343 | 0. 762623465 | 0. 781154036 | -0. 059   | 0. 058136 | -0. 16607 | TPT1              |
| 0. 640503519 | 0. 659755235 | 0. 343265986 | 0. 030929 | -0. 04142 | 0. 186313 | GDA1              |
| 0. 641642152 | 0. 443553864 | 0. 038262982 | -0. 03948 | 0. 081859 | 0. 415703 | RPL20A            |
| 0. 641768476 | 0. 684241481 | 0. 830189162 | 0. 058161 | -0. 07313 | 0. 14341  | DSS1              |
| 0. 641887249 | 0. 690335313 | 0. 509146716 | -0. 0617  | 0. 076223 | -0. 29876 | YIL001W           |
| 0. 642056276 | 0. 24298702  | 1            | 0. 038151 | 0. 11253  | 0. 029501 | VPS24             |
| 0. 642073918 | 0. 006135462 | 0. 451184565 | -0. 4227  | 2. 781715 | 2. 606405 | None              |
| 0. 642443253 | 0. 04859996  | 0. 421368193 | -0. 04035 | -0. 18336 | 0. 220504 | UTP13             |
| 0. 642610648 | 0. 665438196 | 0. 244196805 | -0. 09541 | 0. 125996 | -0. 6628  | DUR3              |
| 0. 642610648 | 1            | 0. 480798039 | 0. 052977 | 0. 000221 | 0. 269375 | RTT102            |
| 0. 643939627 | 0. 853297263 | 0. 238946444 | 0. 115755 | -0. 08213 | -0. 81337 | BIO3              |
| 0. 645490471 | 0. 72385964  | 1            | -0. 05751 | -0. 06584 | -0. 02986 | RAD24             |
| 0. 645885018 | 0. 28690473  | 0. 737748659 | -0. 03793 | -0. 10556 | 0. 121326 | SRP68             |
| 0. 647111174 | 0. 462711274 | 0. 001629245 | -0. 04013 | 0. 081585 | 0. 58523  | RPL25             |
| 0. 647111174 | 0. 996960041 | 0. 699105653 | 0. 041936 | 0. 007324 | 0. 150559 | SDD2              |
| 0. 648350878 | 0. 459813614 | 0. 074275376 | -0. 04253 | 0. 087314 | 0. 400962 | RPS7A             |
| 0. 648350878 | 0. 703189392 | 0. 818523526 | 0. 508335 | 0. 619026 | -1. 30086 | None              |
| 0. 649507877 | 0. 000147156 | 0. 061449807 | -0. 03575 | -0. 28082 | -0. 34799 | MTD1              |
| 0. 650096201 | 0. 261791204 | 0. 879698394 | 0. 113776 | 0. 33281  | 0. 234265 | ICS3              |
| 0. 650096201 | 0. 980772539 | 0. 949025836 | -0. 18609 | 0. 047062 | -0. 25976 | GMC2              |
| 0. 650346433 | 0. 690335313 | 0. 37055688  | 0. 126171 | -0. 16071 | 0. 75757  | YBR196C- <i>l</i> |
| 0. 650573409 | 0. 270323907 | 0. 411752857 | 0. 373222 | -1. 15091 | 2. 385165 | None              |
| 0. 651145464 | 0. 55907882  | 0. 656737385 | 0. 073578 | -0. 12675 | -0. 29016 | TUS1              |
| 0. 651445687 | 0. 714551955 | 0. 644371882 | -0. 05705 | -0. 06796 | -0. 22984 | MMS22             |
| 0. 651691784 | 0. 891627765 | 0. 484106841 | 0. 042432 | 0. 024822 | -0. 21896 | NVJ1              |
| 0. 653987549 | 0. 454132404 | 0. 065524422 | -0. 03388 | 0. 07126  | 0. 331553 | RPS0A             |
| 0. 653987549 | 0. 660417863 | 0. 963910538 | -0. 04562 | 0. 062977 | 0. 058268 | ESS1              |
| 0. 657006231 | 0. 128547958 | 0. 637213394 | -0. 17477 | 0. 652666 | -0. 71555 | YCR095W- <i>l</i> |
| 0. 657347347 | 0. 666045601 | 0. 711247098 | 0. 049131 | -0. 06738 | -0. 17483 | ECM30             |
| 0. 657991891 | 0. 04219607  | 0. 186752472 | 0. 038814 | -0. 18779 | 0. 307034 | RPA135            |
| 0. 659274066 | 0. 324764976 | 0. 835951015 | -0. 2906  | -0. 805   | 0. 778952 | None              |
| 0. 659278291 | 0. 768238502 | 0. 871066692 | 0. 16763  | -0. 17087 | 0. 370502 | None              |
| 0. 659291058 | 0. 066170367 | 0. 430383427 | 0. 04826  | -0. 21568 | -0. 27258 | WAR1              |
| 0. 660843362 | 0. 925860071 | 0. 919926509 | -0. 4133  | 0. 195079 | 0. 712332 | YGR273C           |
| 0. 662344476 | 0. 986070744 | 1            | 0. 59214  | -0. 14033 | -0. 34179 | None              |
| 0. 663882981 | 0. 667040818 | 0. 847051661 | -0. 04954 | 0. 06854  | -0. 12115 | SSU1              |
| 0. 664786199 | 0. 298926458 | 0. 024501628 | -0. 03923 | 0. 111511 | 0. 464696 | RPL32             |
| 0. 665302304 | 0. 019388398 | 0. 931005601 | 0. 04659  | 0. 258375 | -0. 07421 | MSP1              |
| 0. 666523626 | 0. 956181442 | 0. 616944383 | 0. 04753  | -0. 01693 | -0. 20777 | YFR018C           |
| 0. 666523626 | 0. 986465263 | 1            | 0. 585189 | -0. 14006 | -0. 32945 | None              |
| 0. 667930234 | 0. 989216982 | 0. 15492901  | 0. 583892 | -0. 12911 | -5. 83846 | MATALPHA2         |
| 0. 668121988 | 0. 93221185  | 0. 5927044   | -0. 07849 | 0. 035739 | 0. 358972 | CTF8              |
| 0. 668445385 | 0. 224093879 | 0. 045896858 | -0. 03155 | -0. 10275 | 0. 343882 | UTP11             |
| 0. 668881356 | 0. 938960046 | 0. 550781538 | 0. 049901 | 0. 021428 | -0. 24397 | MRS2              |
| 0. 668881356 | 0. 92847479  | 0. 915894177 | -0. 0454  | 0. 02141  | -0. 08248 | YEL025C           |
| 0. 669441699 | 0. 003108642 | 1            | -0. 04869 | 0. 330883 | 0. 007574 | YMR31             |
| 0. 670188597 | 0. 295242295 | 0. 364904247 | 0. 071238 | 0. 207466 | -0. 44868 | MIG2              |
| 0. 670987196 | 0. 231779764 | 1            | 0. 046336 | -0. 15021 | -0. 01027 | AGC1              |
| 0. 671747817 | 0. 367445036 | 0. 38629944  | 0. 054177 | -0. 14058 | 0. 334544 | KAP122            |
| 0. 673189357 | 0. 717157234 | 1            | 0. 055075 | 0. 068715 | -0. 0283  | FSH3              |

|              |              |                                                    |
|--------------|--------------|----------------------------------------------------|
| 0. 673264191 | 0. 584277189 | 0. 072446037 -0. 07042 -0. 12171 -0. 70404 PH05    |
| 0. 673742761 | 0. 03264687  | 0. 400503761 0. 407734 -2. 4779 -3. 57367 YRF1-1   |
| 0. 677031058 | 0. 70751687  | 1 0. 333807 0. 432108 -0. 14585 None               |
| 0. 678217591 | 0. 737846426 | 0. 642912812 0. 029343 0. 034933 -0. 12692 ADE16   |
| 0. 679475883 | 0. 779766213 | 0. 09223367 0. 036145 -0. 03713 0. 354672 RSA3     |
| 0. 680722956 | 0. 43696685  | 0. 410236148 -0. 04181 0. 097143 0. 25592 SDC1     |
| 0. 680785037 | 0. 649577741 | 1 0. 045853 -0. 06972 -0. 01391 SNQ2               |
| 0. 681447698 | 0. 156630548 | 1 -0. 06957 0. 263389 0. 009113 HEM25              |
| 0. 682334688 | 0. 051155386 | 0. 89043028 0. 105313 -0. 52958 -0. 22703 OYE3     |
| 0. 684054727 | 0. 888898048 | 1 -0. 03689 -0. 02381 -0. 00501 BUR6               |
| 0. 684795906 | 0. 826578265 | 0. 526996356 0. 056612 -0. 05002 -0. 29899 MRE11   |
| 0. 686905711 | 0. 027146402 | 0. 848126811 0. 167426 -0. 96181 0. 443529 None    |
| 0. 687476385 | 1            | 0. 708809273 -0. 05207 0. 006654 -0. 20144 THP2    |
| 0. 687541673 | 0. 138242749 | 0. 278240376 -0. 0482 0. 192686 -0. 35789 YLR345W  |
| 0. 687541673 | 0. 665960377 | 0. 91703897 -0. 04186 -0. 06201 0. 079476 DYN1     |
| 0. 688959977 | 0. 967392794 | 0. 264879577 0. 031741 0. 010792 -0. 24131 ALG6    |
| 0. 688959977 | 0. 758077955 | 0. 471735065 0. 349588 -0. 4114 -2. 15906 None     |
| 0. 688959977 | 0. 028113606 | 0. 72853715 -0. 04151 -0. 23341 0. 152172 BRE1     |
| 0. 688959977 | 0. 080514417 | 0. 736753793 -0. 05236 0. 241257 0. 187396 INA17   |
| 0. 688959977 | 0. 363817999 | 0. 764689351 -0. 04304 0. 116883 0. 143618 RDI1    |
| 0. 688959977 | 0. 230929934 | 1 0. 622005 -2. 2335 -0. 73235 None                |
| 0. 689474832 | 0. 724774474 | 0. 609220601 -0. 11953 0. 152521 0. 561916 None    |
| 0. 689829264 | 0. 663252335 | 0. 001354067 -0. 04465 -0. 06734 -0. 73166 DIG2    |
| 0. 689829264 | 0. 604770313 | 0. 299842252 -0. 02812 0. 04862 0. 204146 GRS1     |
| 0. 689829264 | 0. 230911149 | 1 0. 619436 -2. 23495 -0. 72931 None               |
| 0. 689852181 | 0. 516700017 | 0. 641078964 0. 03732 0. 076421 0. 16761 LTP1      |
| 0. 690279029 | 0. 333121659 | 0. 976378097 -0. 04442 0. 127877 -0. 0552 ATX2     |
| 0. 690472783 | 0. 679403914 | 0. 32087275 -0. 05105 0. 073605 -0. 36076 PCL7     |
| 0. 690472783 | 0. 950105874 | 0. 907281575 0. 035712 -0. 01449 0. 072173 NHP10   |
| 0. 691851595 | 0. 098514402 | 1 0. 048443 -0. 21635 -0. 02106 LCD1               |
| 0. 692221997 | 0. 088550918 | 0. 243308748 -0. 03015 -0. 13808 0. 240531 EMP70   |
| 0. 69238084  | 0. 591976174 | 0. 951201607 0. 042705 -0. 07682 0. 065712 PSF1    |
| 0. 692775459 | 1            | 0. 919926509 0. 051423 -0. 00219 -0. 09671 CWC23   |
| 0. 692802831 | 0. 289155055 | 0. 709422392 0. 051106 0. 16013 -0. 20092 LEA1     |
| 0. 693429421 | 0. 727504645 | 0. 605911675 -0. 21636 -0. 28029 -1. 08515 YLL067C |
| 0. 693429421 | 0. 177202487 | 1 0. 045617 -0. 17286 0. 005958 SEC10              |
| 0. 693445904 | 0. 702176983 | 0. 981181758 -0. 08709 0. 119688 -0. 10275 MAY24   |
| 0. 694234071 | 0. 752831669 | 1 0. 042116 -0. 05035 -0. 01504 NST1               |
| 0. 694362921 | 0. 955475747 | 0. 508217414 0. 059578 0. 023081 -0. 33264 ENV7    |
| 0. 694362921 | 0. 868862376 | 0. 930835922 0. 030877 0. 023109 -0. 05398 DCW1    |
| 0. 695224793 | 0. 682031984 | 0. 379660556 0. 031615 0. 046006 0. 210509 ATG27   |
| 0. 697224996 | 0. 408969916 | 0. 223381301 0. 041385 0. 106192 -0. 34369 PNG1    |
| 0. 698973374 | 0. 853333651 | 0. 862693719 0. 03805 -0. 03112 0. 097072 FOB1     |
| 0. 699277539 | 0. 128591907 | 0. 043873822 -0. 03524 0. 148983 0. 421234 RPL24A  |
| 0. 699537071 | 0. 185421497 | 1 -0. 03268 0. 123651 -0. 00886 QNS1               |
| 0. 700436878 | 0. 479033885 | 0. 789517744 -0. 03274 0. 074524 0. 105832 RVB2    |
| 0. 701745425 | 1            | 0. 822329423 0. 046823 -0. 00314 0. 138087 BET1    |
| 0. 702051801 | 0. 996655297 | 0. 373162993 0. 035697 0. 007417 0. 244529 RPS6A   |
| 0. 703253553 | 0. 689168252 | 0. 855492746 -0. 03392 0. 049564 0. 09002 GBP2     |
| 0. 703827043 | 0. 884827129 | 0. 767199943 0. 042453 0. 030241 -0. 14719 MTG1    |
| 0. 70602754  | 0. 753511485 | 0. 855617443 0. 052936 0. 064929 -0. 14132 ROG3    |
| 0. 706631199 | 0. 157568347 | 0. 199257919 -0. 03492 0. 141734 0. 309656 YSA1    |
| 0. 708197992 | 0. 125172898 | 0. 559875531 -0. 04112 -0. 18045 -0. 22095 EPL1    |
| 0. 708976318 | 0. 938960046 | 0. 023505165 -0. 04208 0. 020109 -0. 56453 CRD1    |

|              |              |              |           |           |           |                   |
|--------------|--------------|--------------|-----------|-----------|-----------|-------------------|
| 0. 709092029 | 0. 830118162 | 0. 668635304 | -0. 0556  | 0. 051694 | -0. 24988 | MEC3              |
| 0. 709249634 | 0. 161545506 | 0. 978193638 | -0. 03927 | 0. 159543 | 0. 05017  | MS01              |
| 0. 709257835 | 0. 019381107 | 0. 771051473 | 0. 028534 | -0. 17973 | 0. 099462 | CDC11             |
| 0. 709424754 | 0. 335205662 |              | 1         | -0. 02692 | -0. 0818  | -0. 00884 VMA13   |
| 0. 709424754 | 0. 383120823 |              | 1         | -0. 13578 | 0. 37649  | -0. 03362 ECM11   |
| 0. 710381928 | 0. 318028924 | 0. 169244459 | -0. 03349 | -0. 10498 | 0. 314111 | LOS1              |
| 0. 710557606 | 2. 3107E-08  | 0. 598011569 | 0. 048988 | 0. 615883 | -0. 24878 | SYM1              |
| 0. 711162215 | 0. 020478658 | 0. 803017727 | -0. 06974 | 0. 435151 | 0. 222709 | YIL156W-I         |
| 0. 711400069 | 0. 48908547  |              | 1         | 0. 025831 | 0. 059364 | 0. 025649 TEF4    |
| 0. 711998904 | 0. 266200922 | 0. 536035164 | 0. 050176 | -0. 17336 | 0. 284041 | YOL075C           |
| 0. 7137144   | 0. 057110214 |              | 1         | 0. 086086 | 0. 45686  | -0. 04586 None    |
| 0. 715636546 | 0. 206991704 | 0. 889649609 | -0. 0373  | -0. 14274 | -0. 08826 | ACK1              |
| 0. 716831187 | 0. 045036915 | 0. 181792015 | -0. 03604 | 0. 20211  | -0. 33575 | BAP2              |
| 0. 716848816 | 0. 760915703 | 0. 597863762 | -0. 05141 | 0. 063046 | -0. 26688 | YLR446W           |
| 0. 717306642 | 0. 076398079 | 0. 90086308  | -0. 06341 | 0. 320881 | 0. 143589 | YMR122C           |
| 0. 717326089 | 0. 186602961 | 0. 98500242  | -0. 03158 | 0. 125496 | 0. 037747 | AIM6              |
| 0. 717942856 | 1            | 0. 036953396 | -0. 02938 | -0. 00355 | 0. 382546 | FUR1              |
| 0. 718336966 | 0. 086191139 | 0. 611594186 | -0. 03609 | 0. 17864  | 0. 1846   | MRP21             |
| 0. 718454963 | 0. 509499029 |              | 1         | 0. 035228 | -0. 07979 | 0. 007276 EX070   |
| 0. 718586345 | 0. 069544572 | 0. 847404354 | 0. 032067 | -0. 16697 | 0. 091256 | FKS1              |
| 0. 718586345 | 0. 237544743 | 0. 889649609 | 0. 036251 | 0. 132857 | 0. 087127 | RSM18             |
| 0. 71897404  | 0. 084977816 |              | 1         | -0. 50925 | -2. 96925 | 0. 563427 YIR042C |
| 0. 71917657  | 1            | 0. 530625906 | 0. 051509 | -0. 00699 | -0. 29957 | CYC2              |
| 0. 71917657  | 0. 533524502 |              | 1         | -0. 03128 | 0. 067582 | -0. 01874 PAP1    |
| 0. 71961551  | 0. 939281122 |              | 1         | 0. 235919 | 0. 116057 | -0. 09766 YOR029W |
| 0. 720423195 | 0. 069544572 | 0. 837234982 | 0. 04079  | 0. 212999 | 0. 121928 | AFG1              |
| 0. 721265554 | 0. 760915703 | 0. 608460014 | -0. 03916 | 0. 048777 | -0. 20314 | MTC6              |
| 0. 721345399 | 0. 934155569 | 0. 206936896 | -0. 43819 | 0. 227122 | -4. 8469  | YJL136W-I         |
| 0. 721431252 | 0. 335509445 | 0. 868996053 | -0. 0465  | -0. 14669 | 0. 123447 | RFM1              |
| 0. 721770493 | 0. 099512037 | 0. 238946444 | -0. 04825 | 0. 233406 | 0. 423289 | TSC3              |
| 0. 722757993 | 0. 073267239 |              | 1         | -0. 03023 | 0. 157397 | -0. 00094 PET123  |
| 0. 723659867 | 0. 371129486 | 0. 625394004 | 0. 048721 | -0. 14585 | -0. 24756 | TTI1              |
| 0. 723659867 | 0. 658171258 | 0. 770752057 | 0. 038324 | -0. 06487 | -0. 13964 | RIB2              |
| 0. 723975267 | 0. 590778718 | 0. 306543708 | 0. 047834 | 0. 094549 | -0. 38136 | YDR131C           |
| 0. 724136468 | 0. 184130852 | 0. 98500242  | 0. 048485 | -0. 19915 | -0. 06068 | DSF2              |
| 0. 724378287 | 0. 050831616 | 0. 931568877 | -0. 03825 | -0. 21644 | 0. 071698 | MCM6              |
| 0. 724969532 | 0. 299931985 | 0. 888371569 | -0. 03934 | -0. 13323 | -0. 09771 | MFB1              |
| 0. 726214237 | 0. 387128577 | 0. 709738269 | -0. 0342  | -0. 09964 | 0. 148946 | UBP13             |
| 0. 726997677 | 0. 734964949 | 0. 726816534 | -0. 11324 | -0. 15774 | 0. 468361 | OSW2              |
| 0. 727568416 | 0. 731503094 | 0. 800001697 | -0. 03801 | -0. 05339 | -0. 12907 | YSH1              |
| 0. 727966785 | 0. 083848492 |              | 1         | 0. 02602  | -0. 13431 | 0. 014604 FRS2    |
| 0. 728239451 | 0. 407136042 | 0. 920011392 | -0. 29463 | -0. 85824 | -0. 6506  | YMR316C-I         |
| 0. 728933041 | 0. 925594807 | 0. 97620447  | 0. 054343 | -0. 03115 | -0. 07624 | SLI1              |
| 0. 729278209 | 0. 185910487 | 0. 632443786 | 0. 042987 | 0. 178008 | -0. 21971 | UBS1              |
| 0. 729818674 | 0. 031089948 | 0. 644487558 | -0. 03168 | 0. 197253 | 0. 159276 | YML079W           |
| 0. 730780656 | 0. 014495134 | 0. 921286576 | 0. 028217 | -0. 19707 | 0. 058926 | ADE6              |
| 0. 731357276 | 0. 103376814 | 0. 712223429 | 0. 034505 | -0. 17111 | 0. 151116 | TDA9              |
| 0. 731444934 | 1            | 0. 697869118 | -0. 24151 | 0. 029203 | -1. 13551 | YMR175W-I         |
| 0. 734459248 | 0. 675411275 | 0. 047172169 | -0. 03538 | 0. 058879 | -0. 46054 | GNP1              |
| 0. 734459248 | 0. 895413787 | 0. 238946444 | -0. 39058 | -0. 28145 | -4. 40453 | None              |
| 0. 734459248 | 0. 304011642 | 0. 830848068 | 0. 115997 | 0. 39962  | 0. 367016 | YOR376W           |
| 0. 737638875 | 0. 993946665 | 0. 919926509 | 0. 099755 | -0. 02514 | 0. 214442 | None              |
| 0. 737809583 | 0. 295649423 | 0. 876200558 | 0. 037647 | 0. 133251 | -0. 10079 | CAF130            |
| 0. 740157404 | 0. 228288339 | 0. 129195117 | 0. 032749 | 0. 130291 | 0. 359118 | LSM2              |

|              |              |              |           |           |           |           |
|--------------|--------------|--------------|-----------|-----------|-----------|-----------|
| 0. 740266656 | 0. 19026538  | 0. 781875866 | 0. 052101 | -0. 22228 | -0. 19365 | MDS3      |
| 0. 740939486 | 0. 591976174 | 0. 652552516 | -0. 02869 | -0. 05957 | 0. 147231 | LEM3      |
| 0. 741145139 | 0. 168293937 | 0. 425590725 | 0. 046021 | 0. 20364  | 0. 330468 | POP8      |
| 0. 741555782 | 0. 039817045 | 0. 255041627 | -0. 03622 | 0. 224273 | 0. 329145 | SFT1      |
| 0. 742167299 | 0. 794730765 | 1            | -0. 0888  | 0. 104275 | -0. 02033 | FUS2      |
| 0. 743370873 | 0. 78818634  | 0. 339657587 | 0. 044366 | -0. 0536  | -0. 35817 | NIT2      |
| 0. 743636844 | 0. 470034541 | 0. 648751155 | -0. 03816 | -0. 10118 | 0. 199059 | CTK1      |
| 0. 74364414  | 0. 088550918 | 0. 929344228 | -0. 04496 | 0. 239559 | -0. 09177 | TMT1      |
| 0. 744488753 | 1            | 0. 538133644 | 0. 041896 | -0. 0005  | -0. 26029 | BTS1      |
| 0. 74565969  | 0. 766166784 | 0. 326601143 | 0. 027891 | 0. 036646 | -0. 23108 | HOM3      |
| 0. 745781249 | 0. 712206218 | 0. 688473731 | 0. 109211 | -0. 1732  | -0. 53614 | YEL008W   |
| 0. 746401665 | 0. 334248187 | 0. 261450758 | 0. 035459 | 0. 120896 | 0. 324552 | FPR1      |
| 0. 74720737  | 0. 842773453 | 0. 89719832  | 0. 072783 | -0. 07219 | -0. 18557 | YDL218W   |
| 0. 747319408 | 0. 322712789 | 1            | -0. 04772 | 0. 165947 | -0. 00879 | LDB17     |
| 0. 747880376 | 0. 904357451 | 0. 961702496 | -0. 13545 | -0. 09593 | -0. 23219 | YJL045W   |
| 0. 748659099 | 0. 892678302 | 0. 98198617  | -0. 02523 | 0. 019356 | 0. 035014 | VMA6      |
| 0. 749710528 | 0. 853333651 | 0. 87592683  | -0. 04319 | -0. 04127 | -0. 12081 | TRS85     |
| 0. 749782945 | 5. 66833E-09 | 4. 09193E-05 | -0. 05125 | 0. 757619 | -1. 1823  | SP024     |
| 0. 751036919 | 1            | 0. 711421266 | -0. 03165 | 0. 005994 | -0. 14754 | CDC28     |
| 0. 751275079 | 0. 511816481 | 0. 014757925 | -0. 02584 | -0. 06465 | 0. 422947 | RRP8      |
| 0. 751521267 | 0. 94982823  | 0. 871950707 | 0. 033217 | -0. 0164  | -0. 09516 | GCN5      |
| 0. 75209573  | 0. 009536972 | 0. 97620447  | 0. 032862 | 0. 257997 | 0. 049539 | MSK1      |
| 0. 752582212 | 0. 829832371 | 0. 214567398 | 0. 167704 | 0. 180294 | -1. 71672 | YFR012W-1 |
| 0. 752893877 | 0. 472617197 | 0. 160504258 | -0. 03475 | -0. 09463 | -0. 37878 | KIN28     |
| 0. 752953266 | 0. 046144661 | 0. 834791774 | 0. 039645 | -0. 25063 | -0. 133   | CTS2      |
| 0. 754518851 | 0. 905759808 | 0. 278240376 | 0. 028363 | 0. 020358 | 0. 26064  | RMD9      |
| 0. 75478555  | 0. 601216089 | 0. 715024856 | 0. 253278 | 0. 538473 | -1. 19149 | None      |
| 0. 755492371 | 0. 825517831 | 1            | 0. 348351 | -0. 39377 | 0. 127758 | PAU13     |
| 0. 755773713 | 0. 280013981 | 0. 910579658 | 0. 036691 | -0. 14228 | -0. 08889 | SFP1      |
| 0. 756294057 | 0. 000280237 | 0. 238946444 | -0. 03034 | 0. 312566 | 0. 297219 | MRPL23    |
| 0. 757840918 | 0. 53056287  | 0. 529437087 | -0. 06067 | 0. 14921  | 0. 400393 | TIM9      |
| 0. 758437357 | 0. 085297697 | 0. 841416921 | -0. 06716 | 0. 378216 | 0. 221483 | None      |
| 0. 759002377 | 0. 69190085  | 0. 920011392 | -0. 09604 | 0. 165439 | 0. 220662 | YHR175W-1 |
| 0. 759639957 | 0. 612922906 | 0. 795907717 | -0. 03011 | 0. 063662 | 0. 114804 | RET3      |
| 0. 76023114  | 0. 091928673 | 1            | 0. 204939 | -1. 18577 | 0. 0632   | YPR096C   |
| 0. 760670399 | 0. 871347596 | 1            | 0. 034769 | -0. 03165 | -0. 04017 | MPD1      |
| 0. 761744913 | 0. 212423016 | 0. 744376434 | -0. 03852 | -0. 16951 | -0. 16967 | AIR2      |
| 0. 762707677 | 0. 004542745 | 0. 848379499 | 0. 039149 | 0. 340963 | 0. 127714 | FMC1      |
| 0. 762819944 | 0. 397361658 | 0. 187817207 | -0. 02617 | 0. 084141 | 0. 282019 | RPL15A    |
| 0. 764017002 | 0. 490597664 | 0. 492012834 | -0. 02845 | 0. 077062 | 0. 202284 | EMP24     |
| 0. 765274449 | 1            | 1            | -0. 04369 | -0. 00506 | -0. 04307 | RBH1      |
| 0. 765509221 | 0. 358263416 | 0. 91703897  | -0. 04268 | 0. 148823 | -0. 10292 | RRD1      |
| 0. 765710977 | 0. 530999534 | 0. 98500242  | -0. 18981 | 0. 475811 | -0. 26852 | YLR406C-1 |
| 0. 766925771 | 0. 83604285  | 0. 847404354 | 0. 035669 | -0. 03913 | 0. 118807 | SEN54     |
| 0. 767321073 | 0. 582169769 | 1            | -0. 02835 | -0. 06558 | -0. 01201 | YGR283C   |
| 0. 767408387 | 6. 38852E-05 | 0. 265410494 | -0. 04231 | 0. 487256 | 0. 410841 | YBR285W   |
| 0. 767522081 | 0. 795533688 | 0. 871412074 | -0. 04518 | -0. 05758 | -0. 13701 | PFA3      |
| 0. 77050198  | 0. 892758485 | 0. 920656396 | 0. 028424 | 0. 023409 | 0. 067674 | VPS29     |
| 0. 77050198  | 0. 889553139 | 0. 98500242  | -0. 03554 | 0. 029917 | -0. 05053 | CBP1      |
| 0. 770574734 | 0. 788431804 | 1            | 0. 025272 | -0. 03329 | -0. 01738 | NUP49     |
| 0. 770831351 | 0. 741539213 | 0. 917519739 | 0. 033472 | -0. 05262 | -0. 08203 | MKK1      |
| 0. 771693932 | 0. 004611469 | 0. 847404354 | 0. 030622 | -0. 27657 | -0. 1038  | RNR1      |
| 0. 772245682 | 0. 446288659 | 1            | 0. 040014 | -0. 12183 | 0. 022101 | SBE2      |
| 0. 772443982 | 0. 029454084 | 1            | -0. 03873 | 0. 280137 | 0. 042121 | PIB1      |

|              |              |              |           |           |           |                   |
|--------------|--------------|--------------|-----------|-----------|-----------|-------------------|
| 0. 772507866 | 0. 207863495 | 0. 186880865 | -0. 02655 | -0. 12223 | 0. 296506 | R0K1              |
| 0. 773075834 | 0. 861384572 | 0. 557079281 | -0. 16193 | 0. 160355 | -1. 07649 | BSC4              |
| 0. 773075834 | 0. 709758226 | 0. 870558299 | 0. 032479 | -0. 05665 | -0. 10118 | ZRG17             |
| 0. 775002391 | 0. 614981392 | 0. 211271753 | 0. 032007 | -0. 07107 | -0. 34695 | ADD66             |
| 0. 775376924 | 0. 023022877 | 0. 011257238 | 0. 027988 | -0. 21374 | 0. 510243 | MAK5              |
| 0. 775717756 | 0. 343862699 | 0. 659101564 | -0. 03066 | 0. 113667 | 0. 175599 | CHZ1              |
| 0. 776189469 | 0. 836107259 | 0. 669483248 | -0. 13885 | 0. 156251 | -0. 77765 | None              |
| 0. 776753567 | 0. 788820512 | 0. 358747602 | 0. 093953 | 0. 126404 | -0. 82583 | PAU23             |
| 0. 778244578 | 0. 836389864 | 0. 919926509 | -0. 02747 | -0. 03117 | 0. 068245 | ERD2              |
| 0. 778324119 | 0. 542581881 | 0. 048861894 | 0. 025897 | -0. 06712 | 0. 392437 | CIC1              |
| 0. 778454087 | 0. 698820282 | 0. 659791573 | -0. 46981 | 0. 845766 | 2. 265832 | None              |
| 0. 778868164 | 0. 281429987 | 0. 588105746 | -0. 03316 | 0. 138439 | -0. 21479 | BPL1              |
| 0. 779091319 | 0. 00054349  | 0. 111100599 | 0. 028537 | -0. 30961 | 0. 370851 | NOC3              |
| 0. 780300524 | 0. 87305028  | 0. 007546041 | -0. 04097 | -0. 03976 | -0. 78633 | PLM2              |
| 0. 78094865  | 0. 69799932  | 0. 658909952 | -0. 46455 | 0. 848245 | 2. 279675 | None              |
| 0. 782005521 | 0. 920869756 | 0. 611594186 | -0. 0489  | 0. 034594 | 0. 30973  | CIN4              |
| 0. 782005521 | 0. 055168494 | 0. 739590174 | 0. 034081 | 0. 228801 | 0. 163054 | MSF1              |
| 0. 782318078 | 0. 938960046 | 0. 989809599 | 0. 041059 | -0. 0251  | -0. 05899 | NAM2              |
| 0. 78323441  | 0. 482993634 | 0. 415890779 | -0. 40884 | -1. 2782  | 3. 656117 | None              |
| 0. 783421666 | 0. 468265571 | 0. 084446467 | -0. 02563 | 0. 078154 | 0. 355398 | RPS19A            |
| 0. 783421666 | 0. 27087925  | 0. 908854398 | 0. 156571 | 0. 675448 | 0. 421587 | YHR086W- <i>l</i> |
| 0. 784660676 | 0. 996805372 | 0. 974707572 | 0. 056265 | -0. 01507 | -0. 09649 | SDS3              |
| 0. 784687031 | 1            | 0. 661089241 | 0. 046202 | -0. 00349 | 0. 272687 | POL30             |
| 0. 785741087 | 0. 413008972 | 1            | -0. 02382 | -0. 08111 | -0. 01296 | TPK3              |
| 0. 788089786 | 0. 32591793  | 1            | 0. 03956  | -0. 15888 | -0. 00063 | SLX8              |
| 0. 790169822 | 1            | 0. 717477893 | 0. 092624 | 0. 015703 | -0. 48708 | YGL041W- <i>l</i> |
| 0. 790489629 | 0. 039069167 | 0. 643429399 | -0. 03522 | -0. 26109 | -0. 21766 | CBK1              |
| 0. 790800921 | 0. 821207297 | 0. 62113714  | -0. 0428  | -0. 05428 | -0. 27446 | VPS3              |
| 0. 791584853 | 2. 03535E-05 | 1            | 0. 097612 | 1. 285038 | 0. 011553 | OLI1              |
| 0. 792375753 | 0. 156840624 | 0. 542977891 | 0. 02893  | -0. 15755 | 0. 212031 | SAK1              |
| 0. 79310432  | 1            | 0. 971609311 | 0. 033371 | 0. 004521 | 0. 061831 | MUB1              |
| 0. 793817233 | 0. 161181868 | 0. 667670933 | 0. 026071 | -0. 14151 | -0. 15659 | MOT2              |
| 0. 793817233 | 0. 439851325 | 0. 681411478 | 0. 023576 | 0. 078674 | 0. 137563 | TMA22             |
| 0. 793817233 | 0. 192026738 | 1            | -0. 02939 | 0. 150148 | 0. 032477 | CWC15             |
| 0. 793817233 | 0. 23043753  | 1            | -0. 03621 | -0. 17392 | 0. 00222  | YCS4              |
| 0. 795069256 | 0. 05095414  | 0. 960632458 | -0. 02458 | -0. 17688 | 0. 050361 | RAD3              |
| 0. 796337389 | 0. 514232347 | 0. 974952294 | 0. 130869 | 0. 38184  | -0. 2325  | YIL012W           |
| 0. 79710358  | 0. 473307985 | 0. 906628341 | 0. 039516 | -0. 12577 | 0. 114025 | KRE28             |
| 0. 798462811 | 0. 98811108  | 0. 364904247 | 0. 042437 | -0. 01468 | -0. 40292 | YMR111C           |
| 0. 800166016 | 0. 104019631 | 0. 932413507 | 0. 030637 | -0. 19254 | -0. 07419 | NGG1              |
| 0. 800166016 | 0. 995096172 | 0. 971609311 | 0. 059707 | -0. 01823 | -0. 11201 | None              |
| 0. 800166016 | 0. 00058878  | 1            | 0. 026752 | -0. 31204 | -0. 01547 | MNN1              |
| 0. 800273415 | 0. 050831616 | 0. 69956533  | 0. 022021 | 0. 161127 | 0. 126883 | TOM22             |
| 0. 800273415 | 0. 407136042 | 0. 703759167 | -0. 02872 | -0. 10433 | -0. 16333 | TFC6              |
| 0. 800736945 | 0. 408586762 | 0. 333893948 | 0. 022528 | -0. 08185 | 0. 225803 | TYW1              |
| 0. 800736945 | 0. 073350804 | 0. 541508341 | 0. 331884 | 2. 452195 | 2. 71354  | None              |
| 0. 801592433 | 0. 93456048  | 0. 570229598 | 0. 203097 | 0. 140162 | -1. 51136 | None              |
| 0. 802180753 | 0. 059197475 | 0. 971609311 | -0. 03937 | -0. 28278 | 0. 074162 | HS155             |
| 0. 802936411 | 0. 11876651  | 1            | 0. 036241 | 0. 222738 | 0. 012427 | MSW1              |
| 0. 803140792 | 0. 267371286 | 0. 733341705 | -0. 34208 | -1. 77951 | -1. 86449 | None              |
| 0. 804928369 | 0. 603567849 | 1            | -0. 03224 | 0. 08206  | -0. 01686 | LDB16             |
| 0. 805511123 | 0. 030015186 | 0. 00166885  | 0. 024749 | 0. 202318 | 0. 591655 | RPS29B            |
| 0. 805511123 | 0. 347850933 | 0. 080581045 | 0. 023468 | 0. 096668 | 0. 357754 | RPL40B            |
| 0. 805511123 | 0. 328528692 | 0. 886876142 | 0. 064253 | 0. 273942 | -0. 2118  | ATG4              |

|             |             |             |          |          |          |           |
|-------------|-------------|-------------|----------|----------|----------|-----------|
| 0.805799559 | 1           | 0.836718664 | 0.022259 | 0.001152 | -0.08964 | TH01      |
| 0.806103544 | 0.855981392 | 0.697639077 | 0.028942 | 0.033564 | -0.17202 | LDB19     |
| 0.806569528 | 0.295390559 | 0.76828009  | 0.030176 | -0.13743 | -0.14832 | ACE2      |
| 0.806569528 | 0.850282712 | 0.981177966 | -0.02198 | 0.026178 | 0.038105 | AYR1      |
| 0.808260144 | 0.782318684 | 0.509608089 | -0.02842 | 0.044148 | -0.23232 | ADD37     |
| 0.808260144 | 0.652698925 | 0.727908382 | -0.0323  | 0.074366 | -0.17665 | YDL177C   |
| 0.808260144 | 0.056645029 | 0.772879577 | 0.024791 | -0.18432 | 0.121042 | TRZ1      |
| 0.808260144 | 0.914039764 | 0.840006224 | 0.020475 | -0.01696 | 0.082387 | THR1      |
| 0.808260144 | 0.097739705 | 1           | -0.02311 | -0.15286 | 0.028959 | PUS1      |
| 0.808539875 | 0.342508719 | 0.066288571 | -0.02118 | 0.089468 | 0.339557 | EGD1      |
| 0.810772189 | 0.604770313 | 0.417425061 | 0.206208 | 0.537698 | 1.941711 | None      |
| 0.811262405 | 0.013981458 | 0.113134528 | 0.028127 | -0.26352 | 0.412381 | MAK21     |
| 0.811356683 | 0.513831581 | 0.488400105 | -0.0297  | -0.09268 | -0.25427 | BBP1      |
| 0.811866319 | 0.066877727 | 0.978377916 | -0.0286  | -0.20877 | -0.05169 | TOP2      |
| 0.812174707 | 0.065585799 | 0.333626467 | 0.030557 | -0.22469 | -0.32088 | YBL029W   |
| 0.813702505 | 0.958689082 | 0.629718524 | 0.034383 | 0.019409 | -0.23878 | STP2      |
| 0.815519128 | 0.805302069 | 0.904680493 | 0.027383 | -0.04059 | 0.085823 | SLN1      |
| 0.815904531 | 0.029468425 | 0.167222206 | 0.056191 | 0.480874 | -0.76086 | RRT8      |
| 0.815904531 | 0.105580188 | 0.656171223 | 0.028596 | 0.190656 | -0.19204 | COT1      |
| 0.816064317 | 0.349120443 | 0.69956533  | 0.036924 | -0.15946 | -0.2274  | DBF20     |
| 0.816295035 | 0.665829866 | 0.952440864 | -0.06578 | -0.15189 | 0.153733 | YHR213W-I |
| 0.81743139  | 0.189863208 | 1           | 0.027715 | -0.15728 | 0.007982 | YCK3      |
| 0.819104307 | 0.182752817 | 0.726816534 | -0.02804 | -0.16196 | 0.161436 | NUP157    |
| 0.819177318 | 0.113397822 | 0.411752857 | 0.029088 | -0.19459 | -0.28459 | TFC8      |
| 0.819177318 | 0.621834431 | 0.771782988 | 0.019903 | -0.05169 | 0.102024 | ALA1      |
| 0.819537047 | 0.472617197 | 1           | -0.03434 | -0.12029 | -0.01287 | SKI3      |
| 0.819978239 | 0.564303748 | 0.998341694 | -0.02033 | 0.059873 | -0.0309  | APM4      |
| 0.819983682 | 0.892744236 | 0.254952703 | -0.27014 | 0.266652 | 3.403657 | None      |
| 0.82029634  | 0.193372823 | 0.119718988 | -0.02918 | -0.16688 | 0.440159 | RPA190    |
| 0.82029634  | 0.904357451 | 0.702041373 | -0.04042 | -0.03771 | -0.25191 | YGR015C   |
| 0.82029634  | 0.143407346 | 0.752502722 | -0.03089 | 0.193475 | -0.16628 | WSS1      |
| 0.82029634  | 0.758162333 | 1           | -0.04757 | 0.085876 | -0.04219 | PET112    |
| 0.820593683 | 0.886323024 | 0.491465578 | 0.046076 | -0.04876 | -0.40853 | SET6      |
| 0.820593683 | 0.358012927 | 0.7225564   | 0.032805 | -0.14286 | 0.192736 | HIR2      |
| 0.82149107  | 0.84140879  | 0.930722711 | 0.02963  | 0.039175 | -0.08069 | AEP1      |
| 0.822994405 | 0.0810865   | 0.981177966 | -0.0343  | -0.2532  | -0.06387 | ESP1      |
| 0.823381987 | 0.088550918 | 0.869100567 | -0.02949 | -0.21383 | 0.113178 | TEL2      |
| 0.823583991 | 0.759694936 | 0.661759663 | -0.02472 | -0.04504 | -0.17038 | BSP1      |
| 0.823646359 | 0.16750316  | 1           | 0.092313 | -0.56887 | -0.06991 | SWC7      |
| 0.824645602 | 0.52090053  | 1           | 0.020749 | -0.06761 | -0.02433 | WHI4      |
| 0.825498282 | 0.201173553 | 0.059232365 | -0.02371 | 0.136205 | 0.417694 | RPS18A    |
| 0.826124989 | 0.602717812 | 1           | -0.27567 | 0.764887 | -0.39328 | None      |
| 0.826314738 | 0.826578265 | 0.735602795 | 0.164723 | -0.24018 | -0.96698 | None      |
| 0.826351497 | 0.72990982  | 0.457306305 | 0.025849 | 0.052703 | 0.24764  | YRA2      |
| 0.826351497 | 0.261636207 | 1           | 0.030324 | -0.15981 | 0.017626 | SGM1      |
| 0.826975391 | 0.398157956 | 1           | 0.13535  | -0.5751  | 0.156432 | YIL086C   |
| 0.828165816 | 0.384001707 | 0.318919245 | 0.022616 | 0.097021 | 0.262044 | EGD2      |
| 0.828165816 | 0.202307461 | 0.537891256 | -0.02875 | -0.16768 | 0.247608 | TCB2      |
| 0.828165816 | 0.825517831 | 0.680761083 | -0.03638 | -0.05343 | -0.24642 | IRC6      |
| 0.829058241 | 0.504911953 | 0.846846052 | -0.22205 | 0.754778 | -0.97463 | MRPL38    |
| 0.829395869 | 0.45341927  | 0.586097635 | -0.09592 | 0.362523 | 0.768959 | SRT1      |
| 0.830471847 | 0.942368879 | 0.484106841 | -0.33572 | -0.2406  | -3.44844 | YJR151W-I |
| 0.830471847 | 0.512778293 | 1           | -0.03041 | -0.10371 | -0.00939 | SYF1      |
| 0.830532264 | 0.27087925  | 0.411976149 | 0.021581 | 0.113694 | 0.222734 | CPR5      |



|              |              |                                                     |
|--------------|--------------|-----------------------------------------------------|
| 0. 830532264 | 0. 617350035 | 1 -0. 03087 -0. 08572 -0. 02771 SPC72               |
| 0. 831532169 | 0. 172011278 | 0. 154422599 0. 035256 0. 219925 -0. 52606 IM032    |
| 0. 831532169 | 0. 303874634 | 0. 803816091 -0. 02766 0. 138104 -0. 13722 IML3     |
| 0. 832095654 | 0. 970365023 | 0. 06522464 -0. 02203 0. 011922 0. 39377 TMA16      |
| 0. 834321911 | 0. 879819172 | 0. 960655888 0. 032997 0. 039013 -0. 07976 SEF1     |
| 0. 834434629 | 0. 343957891 | 0. 913908205 0. 024032 0. 113741 -0. 07838 THG1     |
| 0. 834739623 | 0. 290286754 | 0. 672010939 0. 028975 -0. 15127 0. 206357 KAP120   |
| 0. 837324998 | 0. 885372644 | 0. 705630037 0. 034522 0. 039661 -0. 2304 YKL222C   |
| 0. 837747075 | 0. 582123297 | 0. 201440577 -0. 01733 -0. 05353 -0. 24768 HH01     |
| 0. 838641409 | 0. 518133314 | 1 -0. 02062 0. 071756 -0. 01691 YKT6                |
| 0. 840379492 | 0. 9690209   | 0. 135324685 0. 028098 0. 016084 -0. 44871 PAR32    |
| 0. 841243895 | 0. 055657167 | 0. 870558299 -0. 0235 0. 202116 0. 096974 NAS6      |
| 0. 841822223 | 0. 022302219 | 0. 014857079 -0. 02142 -0. 21656 0. 502353 ERB1     |
| 0. 842287266 | 0. 38127191  | 0. 69579659 -0. 02271 0. 104321 0. 159649 YKL033W-/ |
| 0. 842399319 | 0. 354272098 | 0. 417425061 0. 029359 0. 141664 -0. 31638 YKU70    |
| 0. 842399319 | 0. 43696685  | 1 0. 01666 -0. 06924 -0. 01397 ILV2                 |
| 0. 842767051 | 0. 265350931 | 0. 91703897 0. 023831 -0. 13451 -0. 07935 STV1      |
| 0. 843656281 | 0. 58105513  | 0. 886952303 0. 030301 -0. 09667 0. 119062 PET309   |
| 0. 843679477 | 0. 414293185 | 0. 58876642 -0. 02991 0. 129764 -0. 25522 SIR1      |
| 0. 843679477 | 0. 843393723 | 0. 902712809 0. 021224 -0. 03072 -0. 07752 MUD2     |
| 0. 843679477 | 0. 643758676 | 0. 960632458 -0. 0273 -0. 07557 0. 069073 TOF2      |
| 0. 843943698 | 0. 54996536  | 1 0. 077139 0. 261075 -0. 04723 None                |
| 0. 844982905 | 0. 892236467 | 0. 952440864 0. 027488 0. 031175 0. 073267 DER1     |
| 0. 845364165 | 0. 691732797 | 1 0. 022609 0. 055724 -0. 01105 PRI1                |
| 0. 845826143 | 0. 080426839 | 0. 654230288 -0. 27416 2. 403737 1. 969816 None     |
| 0. 845872011 | 0. 94606055  | 1 -0. 11883 -0. 08926 0. 075558 None                |
| 0. 846291919 | 0. 887970391 | 1 -0. 2321 0. 27228 -0. 37703 None                  |
| 0. 847406303 | 0. 150742703 | 0. 652552516 0. 257608 -2. 09362 -2. 52563 None     |
| 0. 847406303 | 0. 206110478 | 1 0. 036332 -0. 23159 0. 020605 MCM22               |
| 0. 84785635  | 0. 035632723 | 0. 256670588 -0. 0378 0. 36478 -0. 5198 YGR035C     |
| 0. 84879128  | 0. 610223632 | 0. 76828009 -0. 06591 0. 202654 -0. 39368 AUA1      |
| 0. 849892707 | 0. 997630214 | 0. 98500242 -0. 0239 -0. 00823 -0. 04791 YMR102C    |
| 0. 850016452 | 0. 002281388 | 0. 892830092 0. 019298 0. 256584 0. 075611 SDH3     |
| 0. 850230548 | 0. 04046433  | 0. 41680372 -0. 02572 -0. 24734 -0. 28931 THI3      |
| 0. 850972575 | 0. 57792812  | 0. 715570823 -0. 02005 -0. 06674 -0. 13882 MTC5     |
| 0. 851487269 | 0. 839560652 | 0. 698289037 -0. 18098 0. 274319 -1. 33029 SAE3     |
| 0. 851835576 | 0. 447812948 | 1 0. 025679 0. 109453 -0. 00847 YPT6                |
| 0. 852305008 | 0. 823461891 | 0. 837446458 -0. 01841 -0. 03059 -0. 09163 NPP1     |
| 0. 853027215 | 0. 332602552 | 1 0. 037763 -0. 20078 -0. 04314 YDL211C             |
| 0. 854759479 | 0. 321781322 | 0. 951428598 -0. 04286 0. 232033 0. 120159 YGR153W  |
| 0. 855144132 | 1            | 0. 546032589 -0. 11644 -0. 01359 1. 124225 None     |
| 0. 855144132 | 0. 413242794 | 0. 750416368 0. 018156 0. 08383 -0. 11639 CSG2      |
| 0. 855151195 | 0. 004742556 | 0. 889649609 0. 07049 0. 90228 -0. 28757 YDR010C    |
| 0. 856247191 | 0. 724702775 | 0. 238946444 -0. 02159 -0. 05176 -0. 3212 CDC16     |
| 0. 85709318  | 0. 304299791 | 0. 324585433 -0. 20846 1. 172614 -3. 00081 COX2     |
| 0. 857618886 | 0. 551390968 | 0. 930835922 0. 253586 0. 922568 -0. 80037 None     |
| 0. 85848676  | 0. 205804692 | 0. 368959414 -0. 01696 -0. 11399 -0. 21238 TOM71    |
| 0. 858514673 | 0. 855524783 | 0. 71503018 -0. 02318 0. 034491 -0. 16699 TOK1      |
| 0. 860163333 | 0. 030733392 | 0. 924605282 0. 027941 -0. 29592 -0. 09643 SYG1     |
| 0. 860206122 | 0. 950685743 | 0. 118862393 -0. 01862 0. 014261 0. 341197 RRP1     |
| 0. 860887449 | 0. 624729213 | 0. 616944383 0. 105163 0. 331963 -0. 94021 None     |
| 0. 861085725 | 0. 333037056 | 0. 919935222 0. 020802 -0. 115 -0. 07413 PEX8       |
| 0. 861220657 | 0. 514749074 | 1 0. 021934 -0. 08673 -0. 03388 YTA7                |
| 0. 861256332 | 0. 490088889 | 0. 93147427 0. 016768 0. 069303 0. 054667 GIR2      |

|             |             |             |          |          |          |                   |
|-------------|-------------|-------------|----------|----------|----------|-------------------|
| 0.861393903 | 0.136763555 | 1           | -0.32647 | 2.527707 | -0.4049  | None              |
| 0.861550343 | 0.763573287 | 0.699858425 | -0.01917 | -0.04127 | -0.14702 | YVC1              |
| 0.862094348 | 0.999736798 | 0.420929331 | -0.02222 | -0.00772 | -0.26455 | QDR3              |
| 0.862332079 | 0.443918989 | 1           | -0.15331 | 0.691204 | -0.15059 | None              |
| 0.863158217 | 0.191795718 | 0.00394694  | 0.027856 | 0.196746 | -0.82411 | UBA3              |
| 0.864258618 | 0.122042485 | 0.467852646 | -0.02854 | 0.232518 | 0.325303 | TGL2              |
| 0.865036236 | 0.066004473 | 1           | 0.02304  | 0.217583 | -0.01689 | SC02              |
| 0.865036236 | 0.363817999 | 1           | 0.18303  | 0.972316 | -0.12178 | None              |
| 0.865214184 | 0.031947208 | 0.88808385  | 0.01771  | -0.19202 | -0.07783 | KRE6              |
| 0.865214184 | 0.882360286 | 1           | -0.18308 | -0.25044 | -0.25993 | None              |
| 0.865822744 | 0.054047303 | 0.484474484 | -0.04703 | 0.462474 | -0.52406 | PDH1              |
| 0.866012927 | 0.471162403 | 0.76367822  | -0.01759 | -0.07799 | -0.11653 | PPQ1              |
| 0.866497291 | 0.387128577 | 0.783364287 | 0.014115 | -0.07292 | 0.08905  | TIF3              |
| 0.867393206 | 0.014780962 | 0.713888298 | 0.024389 | -0.29923 | 0.18635  | SPT21             |
| 0.86935396  | 0.374954065 | 0.710774648 | 0.02507  | -0.13537 | -0.19614 | CCZ1              |
| 0.86935396  | 0.602459029 | 1           | 0.040714 | -0.14276 | -0.00212 | YNR064C           |
| 0.87033159  | 0.184130852 | 0.492136803 | -0.02309 | -0.1725  | 0.2631   | YDR222W           |
| 0.870936285 | 0.182567214 | 0.01735184  | 0.015337 | 0.114961 | 0.411955 | RPS20             |
| 0.870936285 | 0.922137802 | 0.67221425  | 0.021038 | -0.0223  | 0.180369 | SMB1              |
| 0.870936285 | 0.966122236 | 1           | -0.03976 | 0.027821 | 0.062625 | YPL034W           |
| 0.872863779 | 0.517152851 | 0.281435365 | 0.027598 | 0.115474 | -0.42089 | POP6              |
| 0.874667838 | 0.726146888 | 1           | 0.014538 | 0.038312 | 0.024257 | TDA3              |
| 0.875357573 | 0.099936663 | 0.990712634 | -0.01453 | -0.13273 | -0.03163 | CCS1              |
| 0.876973071 | 0.885372644 | 0.949939733 | 0.019826 | 0.028091 | -0.06354 | YER010C           |
| 0.877722989 | 0.736287769 | 0.883018242 | -0.0558  | -0.14538 | -0.2684  | None              |
| 0.88015479  | 0.427585494 | 0.906628341 | 0.018228 | 0.093914 | 0.078375 | TCP1              |
| 0.880488741 | 0.967469415 | 1           | 0.013494 | -0.00975 | 0.001326 | HEK2              |
| 0.880707838 | 0.889053342 | 0.702041373 | -0.02462 | -0.03446 | -0.20786 | TEX1              |
| 0.880913595 | 0.024098511 | 0.179756965 | 0.013088 | -0.16154 | 0.243692 | RPA49             |
| 0.880913595 | 0.209597822 | 0.570988724 | -0.02136 | 0.160831 | -0.22836 | LYS5              |
| 0.880913595 | 0.496585998 | 0.69828171  | 0.140842 | 0.638042 | 1.202501 | None              |
| 0.880913595 | 0.826578265 | 0.733389979 | -0.01718 | -0.03288 | 0.133572 | GDT1              |
| 0.882005661 | 0.885106299 | 0.677620076 | 0.024319 | 0.035709 | -0.2187  | PCA1              |
| 0.882754207 | 0.730740342 | 0.901225243 | 0.015788 | -0.04302 | -0.07159 | HFI1              |
| 0.883115881 | 0.950105874 | 0.824664851 | -0.02037 | 0.017839 | -0.12486 | GEP5              |
| 0.883678378 | 0.514232347 | 0.226565606 | 0.239923 | 1.080655 | 4.446068 | None              |
| 0.883678378 | 0.633340819 | 0.47679402  | -0.01391 | -0.04904 | -0.17456 | VPS74             |
| 0.883678378 | 0.759529423 | 0.769266218 | -0.18066 | 0.442499 | -1.29659 | None              |
| 0.883678378 | 0.915872899 | 0.888371569 | -0.02168 | 0.025692 | 0.105626 | SSU72             |
| 0.883768911 | 0.064038126 | 0.016020217 | -0.03859 | 0.405947 | -1.13124 | SRD1              |
| 0.88388589  | 0.583819577 | 0.514203536 | 0.021111 | -0.08354 | 0.252757 | ORC3              |
| 0.888160932 | 0.438384456 | 1           | 0.013175 | -0.07017 | 0.015746 | RVB1              |
| 0.888352736 | 0.849224058 | 1           | 0.158587 | -0.28965 | -0.10389 | None              |
| 0.888540912 | 0.888648886 | 0.051772428 | 0.225316 | 0.334894 | -7.15141 | YDL007C- <i>l</i> |
| 0.888540912 | 0.189863208 | 0.894445004 | 0.016581 | -0.13602 | -0.07991 | GLY1              |
| 0.889158621 | 0.214629898 | 0.859769494 | 0.019942 | -0.15726 | 0.112993 | MOT1              |
| 0.889415532 | 0.346188985 | 0.719999469 | 0.02926  | 0.185292 | -0.24803 | UBC12             |
| 0.889451054 | 0.084573821 | 1           | -0.02595 | -0.26939 | 0.015818 | NUP159            |
| 0.889478682 | 0.255932116 | 0.947945497 | -0.05451 | 0.401678 | -0.19035 | None              |
| 0.890274194 | 0.884320839 | 0.739335611 | 0.194558 | 0.303991 | 1.569355 | YOR011W- <i>l</i> |
| 0.890925144 | 1           | 0.943056599 | -0.02673 | 0.009002 | -0.09665 | GMC1              |
| 0.891275448 | 0.657364999 | 0.67221425  | 0.025126 | 0.087854 | -0.24204 | RRG1              |
| 0.892492737 | 0.066370363 | 0.919926509 | -0.01947 | 0.215484 | -0.08357 | COQ9              |
| 0.893863043 | 0.731106025 | 1           | -0.23811 | 0.691171 | -0.35962 | None              |

|             |             |             |          |          |          |         |
|-------------|-------------|-------------|----------|----------|----------|---------|
| 0.89401981  | 0.154494068 | 0.47497166  | -0.02301 | 0.208396 | -0.30811 | NCA2    |
| 0.894387718 | 0.378211699 | 0.365762079 | 0.013817 | -0.08583 | 0.214635 | CNS1    |
| 0.894549227 | 0.247677793 | 0.164360131 | 0.01656  | 0.128031 | 0.345432 | VMA10   |
| 0.895627954 | 0.663621022 | 0.69579659  | -0.014   | 0.049349 | 0.133071 | BCP1    |
| 0.895627954 | 0.436731198 | 1           | -0.01987 | -0.11167 | -0.00195 | CDC4    |
| 0.895983078 | 0.862941666 | 0.565513961 | -0.01936 | -0.0347  | -0.23046 | LDH1    |
| 0.896269289 | 0.893976085 | 0.045166127 | 0.20195  | 0.302212 | -7.08879 | RRT7    |
| 0.896739779 | 0.386672121 | 0.348820609 | -0.0165  | 0.101988 | -0.26545 | MDM34   |
| 0.896739779 | 1           | 0.822329423 | 0.022287 | -0.00076 | -0.15044 | HUA2    |
| 0.896739779 | 0.092327558 | 1           | -0.01737 | -0.18569 | 0.001697 | DSN1    |
| 0.897065667 | 0.321967781 | 0.114649943 | -0.05111 | 0.354016 | -1.18356 | REC8    |
| 0.897673972 | 0.134923757 | 0.891215531 | 0.017197 | -0.16743 | 0.089441 | KAP95   |
| 0.899013343 | 0.372622288 | 0.082586739 | 0.014615 | 0.094641 | 0.36264  | RPL19A  |
| 0.899013343 | 0.001867712 | 0.103916575 | -0.02519 | -0.45905 | 0.606271 | YBL113C |
| 0.899013343 | 0.39094198  | 0.478124319 | -0.02185 | -0.13658 | 0.303245 | TCB3    |
| 0.899117306 | 0.252920299 | 0.440858646 | 0.018788 | -0.14964 | 0.274366 | SNF1    |
| 0.899117306 | 0.36634644  | 0.737914729 | -0.02043 | -0.13443 | -0.17642 | SKT5    |
| 0.89914586  | 0.018092653 | 0.967406184 | 0.017789 | 0.25702  | 0.058321 | COQ4    |
| 0.899155126 | 0.098340256 | 1           | -0.04482 | -0.48319 | -0.04461 | CTF13   |
| 0.89997777  | 0.629816198 | 0.615253714 | 0.01531  | 0.060826 | -0.17391 | HLJ1    |
| 0.900034837 | 3.96256E-07 | 0.927845118 | -0.04201 | 1.115715 | -0.17968 | STL1    |
| 0.900092856 | 0.939477921 | 0.82890057  | -0.01186 | 0.012971 | -0.08089 | AAT2    |
| 0.900618802 | 0.41577527  | 0.831867858 | -0.01782 | -0.10799 | -0.12095 | SGN1    |
| 0.901939512 | 0.084342343 | 0.929303164 | -0.01939 | -0.21997 | 0.083609 | MCM2    |
| 0.902538934 | 1           | 0.902712809 | 0.016936 | 0.006266 | 0.087458 | CHC1    |
| 0.903118513 | 0.003765202 | 0.952295244 | -0.01783 | 0.313456 | 0.06712  | SDH5    |
| 0.903118513 | 0.999736798 | 1           | -0.20122 | -0.08859 | -0.34313 | None    |
| 0.903139988 | 0.925367028 | 0.962371769 | 0.097071 | 0.123234 | -0.34167 | None    |
| 0.90350216  | 0.561621643 | 0.69956533  | -0.01197 | -0.0566  | -0.11942 | ARP7    |
| 0.903515303 | 0.017246708 | 0.269021848 | 0.01457  | -0.2206  | 0.277767 | UBP10   |
| 0.903515303 | 0.381024561 | 0.689558052 | -0.0195  | -0.12967 | -0.19946 | CTF4    |
| 0.903515303 | 0.112287674 | 0.985958815 | -0.01181 | 0.126382 | 0.032209 | YMR315W |
| 0.904475408 | 0.907732085 | 0.830189162 | 0.058051 | 0.084401 | -0.40677 | MER1    |
| 0.904564564 | 0.720356067 | 0.178594088 | 0.024912 | 0.081443 | -0.54559 | MSS18   |
| 0.904564564 | 0.508655752 | 0.781154036 | 0.025331 | 0.133047 | -0.20529 | THI74   |
| 0.904689069 | 0.172568227 | 0.103916575 | 0.045678 | 0.433829 | -1.13422 | SFC1    |
| 0.904906216 | 0.635232059 | 0.385959394 | 0.018766 | 0.076602 | -0.30722 | YUH1    |
| 0.90496132  | 0.788431804 | 1           | 0.016182 | 0.041955 | 0.018941 | RPC17   |
| 0.905103014 | 0.547312091 | 1           | -0.0178  | 0.087557 | -0.01911 | ERP4    |
| 0.906191739 | 0.678988713 | 0.672010939 | 0.016315 | 0.060192 | -0.1762  | IKI1    |
| 0.906225165 | 0.042568476 | 0.649787892 | 0.051815 | 0.692164 | -0.58216 | CRC1    |
| 0.906406561 | 0.317033104 | 1           | -0.01714 | 0.129803 | -0.02714 | MIM1    |
| 0.906505816 | 0.362954426 | 0.844390643 | -0.01479 | 0.103811 | -0.10097 | PRO3    |
| 0.906754139 | 1           | 0.795907717 | -0.11301 | 0.013114 | -0.90911 | None    |
| 0.908531175 | 0.76724126  | 0.385959394 | -0.01736 | 0.049911 | -0.2922  | YAF9    |
| 0.908531175 | 0.912049034 | 0.807027851 | 0.015429 | 0.022621 | 0.119555 | BPH1    |
| 0.911326942 | 0.199127168 | 0.60682346  | 0.018838 | -0.18019 | 0.237644 | USO1    |
| 0.911326942 | 0.118712454 | 0.967394603 | 0.016469 | 0.184492 | -0.05927 | KXD1    |
| 0.911779228 | 0.039495936 | 0.509579361 | -0.01748 | 0.247243 | 0.256177 | MAM33   |
| 0.912591184 | 0.541557467 | 0.027182603 | 0.13635  | -0.74145 | 5.739338 | None    |
| 0.912704282 | 0.098003967 | 0.024892656 | 0.015633 | 0.185341 | 0.530257 | RPS31   |
| 0.914352481 | 0.99176478  | 0.831761374 | -0.01533 | 0.009271 | -0.11548 | CSH1    |
| 0.914917671 | 0.500260684 | 0.907281575 | -0.01407 | 0.081016 | -0.07701 | RFA2    |
| 0.915727695 | 0.897457836 | 0.845425423 | -0.01751 | -0.02973 | 0.127318 | RSC1    |

|             |             |             |          |          |          |                   |
|-------------|-------------|-------------|----------|----------|----------|-------------------|
| 0.916124711 | 0.996753756 | 0.74594446  | -0.01377 | 0.007505 | 0.132195 | YGL140C           |
| 0.916895739 | 0.637757348 | 0.689893247 | 0.018471 | 0.081831 | 0.208391 | ERP6              |
| 0.917115959 | 0.32591766  | 0.308976846 | 0.010468 | 0.08439  | 0.208812 | ACT1              |
| 0.917682362 | 1           | 0.068005273 | -0.01785 | 0.006864 | -0.52724 | GSC2              |
| 0.917682362 | 0.945788608 | 1           | -0.01529 | 0.018017 | -0.0186  | RGD2              |
| 0.918013407 | 0.905759808 | 1           | 0.018958 | -0.03118 | 0.040848 | APN2              |
| 0.919551984 | 0.361237604 | 0.702041373 | 0.010338 | -0.08026 | 0.116336 | HOC1              |
| 0.919551984 | 0.767694173 | 1           | 0.015551 | -0.04834 | -0.03313 | THP1              |
| 0.919731181 | 0.899105948 | 0.061432357 | 0.010684 | -0.01854 | 0.329452 | TRM1              |
| 0.91982216  | 0.302233138 | 0.506627176 | 0.023935 | 0.205124 | -0.37442 | LEU5              |
| 0.92018239  | 0.680755208 | 0.62830703  | -0.01668 | 0.068103 | 0.217312 | VMA21             |
| 0.921264085 | 0.931981036 | 0.444392343 | 0.153222 | -0.21449 | 2.713385 | None              |
| 0.922353756 | 0.000900424 | 1           | 0.013644 | 0.309209 | -0.03006 | YBR085C- <i>l</i> |
| 0.922393144 | 0.615223063 | 0.265639548 | 0.013093 | 0.063935 | 0.289643 | RPL21B            |
| 0.922513127 | 0.759694936 | 0.647440092 | 0.02816  | 0.093254 | 0.36203  | None              |
| 0.924747826 | 0.29991394  | 0.156558309 | -0.01659 | -0.14867 | -0.43805 | TIR1              |
| 0.925770676 | 0.57641366  | 1           | 0.014165 | -0.07725 | -0.01612 | YHL017W           |
| 0.928289758 | 0.928554724 | 0.612191336 | -0.0107  | -0.01611 | 0.152108 | VMA8              |
| 0.929977838 | 0.896286063 | 0.873533661 | 0.015728 | -0.03012 | -0.11348 | SWD2              |
| 0.930225666 | 0.953675948 | 0.523868802 | -0.0131  | 0.015758 | 0.217013 | BOP3              |
| 0.930225666 | 0.091342198 | 0.960632458 | 0.012382 | -0.17181 | 0.055075 | KEX2              |
| 0.93335548  | 0.040834333 | 0.513019288 | -0.01126 | 0.18636  | 0.193752 | MRP20             |
| 0.933926177 | 0.37662751  | 1           | 0.011794 | -0.09957 | -0.03316 | TAF8              |
| 0.933931712 | 0.935433283 | 0.108233883 | 0.140582 | -0.2103  | -5.50831 | None              |
| 0.934098267 | 0.217407387 | 0.831867858 | 0.016436 | 0.18075  | 0.144531 | STE18             |
| 0.93420116  | 0.335509445 | 0.093444318 | 0.017807 | 0.161515 | 0.56891  | YIL002W- <i>l</i> |
| 0.934249309 | 0.883064096 | 0.08251531  | -0.01505 | -0.03312 | -0.4903  | PCL10             |
| 0.934318618 | 0.995958449 | 1           | -0.06294 | 0.040654 | -0.1838  | None              |
| 0.93478579  | 0.177324846 | 0.930420244 | -0.01825 | 0.217183 | 0.10082  | CDC31             |
| 0.937136435 | 0.020434856 | 0.741079602 | 0.043651 | 0.82928  | 0.499983 | YMR254C           |
| 0.937310107 | 0.023687856 | 0.867399954 | 0.016733 | -0.31644 | -0.13291 | SMC1              |
| 0.938488981 | 0.028520862 | 6.51059E-07 | -0.01209 | -0.22411 | -0.90028 | MET1              |
| 0.939155046 | 0.797072613 | 0.139633449 | 0.016706 | 0.054904 | 0.512453 | AMD2              |
| 0.939223782 | 0.295242295 | 0.985958815 | 0.011517 | 0.117281 | 0.041679 | CBC2              |
| 0.939234136 | 1           | 1           | -0.0105  | -0.00583 | 0.015549 | YGR125W           |
| 0.939360856 | 0.572433652 | 0.75226958  | 0.07614  | 0.466688 | 0.864266 | YCL042W           |
| 0.939912227 | 0.940255249 | 0.218100263 | 0.175099 | 0.259113 | -5.33176 | None              |
| 0.940346212 | 0.57019157  | 0.802035501 | 0.009313 | 0.058112 | -0.09438 | STT3              |
| 0.940346212 | 0.666900591 | 0.927845118 | 0.051723 | 0.258284 | -0.30755 | None              |
| 0.941042698 | 1           | 0.962684605 | -0.01283 | 0.006258 | -0.06132 | COQ10             |
| 0.942095126 | 0.939281122 | 0.217184527 | 0.170065 | 0.262226 | -5.33202 | None              |
| 0.94265266  | 0.304258036 | 1           | 0.016924 | -0.17562 | -0.01239 | SFL1              |
| 0.942982775 | 0.843062252 | 0.721271027 | -0.01187 | -0.03391 | -0.15381 | DCC1              |
| 0.943044287 | 0.72085728  | 0.013045788 | 0.010556 | -0.04719 | -0.49732 | TLG2              |
| 0.943671092 | 0.032709474 | 0.400211383 | 0.011939 | -0.22801 | 0.264636 | NAN1              |
| 0.944948639 | 0.076965336 | 0.566604088 | 0.011352 | -0.18735 | 0.201634 | NIP1              |
| 0.945622151 | 0.006785237 | 0.69828171  | 0.007603 | 0.180489 | 0.108302 | UGP1              |
| 0.945622151 | 0.835126825 | 0.868996053 | 0.015508 | 0.047422 | -0.13269 | RMD5              |
| 0.946016792 | 0.230450293 | 0.942694497 | -0.0112  | -0.1361  | -0.06327 | MCM7              |
| 0.946570874 | 0.303946937 | 0.263985261 | -0.00944 | 0.10182  | -0.25806 | SAM35             |
| 0.946570874 | 0.501310332 | 1           | -0.00913 | -0.06898 | 0.009051 | HST1              |
| 0.94705238  | 0.484602574 | 0.972387712 | -0.01084 | -0.08523 | -0.05006 | NSG1              |
| 0.94705238  | 1           | 1           | -0.01042 | 0.00664  | -0.01694 | SSQ1              |
| 0.947175874 | 0.665960377 | 0.021809306 | -0.01491 | -0.08053 | 0.692761 | UBP16             |

|             |             |             |          |          |          |                   |
|-------------|-------------|-------------|----------|----------|----------|-------------------|
| 0.947881443 | 0.034785673 | 0.020319939 | 0.011158 | -0.22082 | 0.527583 | RRP5              |
| 0.948254707 | 0.885372644 | 0.131133458 | -0.00889 | -0.02195 | -0.30465 | CDC73             |
| 0.948254707 | 0.621372579 | 0.251462984 | -0.01237 | 0.075468 | -0.35297 | PET8              |
| 0.948254707 | 0.858991565 | 0.794208498 | 0.009801 | -0.02787 | -0.11098 | YPT32             |
| 0.948254707 | 0.936226276 | 0.91703897  | 0.014471 | 0.024586 | -0.10099 | CTP1              |
| 0.948922756 | 0.963282012 | 0.571709772 | 0.015065 | 0.01973  | -0.27752 | NDL1              |
| 0.948971244 | 1           | 0.929303164 | -0.01106 | -0.00247 | -0.0713  | TOR2              |
| 0.950188921 | 0.621834431 | 0.841416921 | -0.03737 | -0.23471 | -0.38079 | OST2              |
| 0.950475148 | 0.773888085 | 0.335356848 | 0.01857  | 0.075062 | -0.48294 | YDL009C           |
| 0.950728639 | 0.019107411 | 0.591346544 | 0.114722 | 2.912122 | 2.337239 | None              |
| 0.950728639 | 0.737846426 | 0.847404354 | -0.13213 | 0.612538 | 1.288229 | RRT15             |
| 0.951630564 | 0.289240166 | 0.352630353 | -0.01287 | 0.151732 | -0.33026 | PHO81             |
| 0.95180053  | 1           | 0.87592683  | 0.028093 | -0.01574 | -0.25001 | YCR025C           |
| 0.951817275 | 0.946594159 | 0.125375403 | 0.149946 | 0.241251 | 5.828699 | None              |
| 0.951861514 | 0.949363945 | 0.710353715 | 0.010584 | 0.016607 | 0.157713 | EFM4              |
| 0.951918369 | 0.213761989 | 1           | 0.008756 | -0.11763 | 0.011543 | RCK2              |
| 0.953519621 | 0.775390182 | 0.215066762 | 0.017797 | 0.074099 | -0.56951 | YDL183C           |
| 0.953822131 | 0.290500262 | 0.152940749 | -0.01001 | -0.12128 | 0.356    | POL5              |
| 0.953890223 | 1           | 0.960632458 | -0.08531 | 0.0251   | 0.483376 | None              |
| 0.9540342   | 0.237677178 | 0.165340833 | 0.008885 | 0.117305 | 0.311271 | RPS17B            |
| 0.954066589 | 0.425297662 | 0.88087787  | 0.007898 | -0.07576 | 0.070987 | NOP56             |
| 0.954801274 | 0.942368879 | 0.764689351 | 0.052315 | 0.090167 | -0.70029 | YGL034C           |
| 0.955724012 | 0.501748806 | 0.875200775 | 0.01063  | 0.089566 | 0.099829 | TRS33             |
| 0.955724012 | 0.09702616  | 1           | -0.00968 | -0.17229 | 0.004857 | ASM4              |
| 0.956373628 | 0.284831522 | 0.635840497 | -0.01053 | 0.132761 | 0.192165 | SEC11             |
| 0.956597089 | 0.164247051 | 0.393317291 | -0.00806 | 0.124776 | 0.209538 | PRX1              |
| 0.956821269 | 0.933553067 | 0.976159573 | -0.01117 | 0.021743 | -0.05665 | GEF1              |
| 0.956882569 | 0.448302145 | 0.205616642 | -0.00919 | 0.087076 | -0.31116 | MSC3              |
| 0.95772276  | 0.693571609 | 1           | 0.009952 | -0.05664 | 0.000847 | COP1              |
| 0.95778516  | 0.000356469 | 0.358747602 | 0.110091 | 3.651899 | 3.281657 | None              |
| 0.958588904 | 0.005377068 | 0.98500242  | -0.01139 | 0.323022 | -0.05214 | MRPL25            |
| 0.958727913 | 0.277433134 | 0.336735207 | 0.091994 | 1.212702 | 2.780033 | None              |
| 0.959147177 | 0.36194188  | 0.291391691 | -0.00934 | 0.106944 | 0.286996 | CTR2              |
| 0.959208535 | 0.813026602 | 0.660358366 | 0.013726 | 0.054083 | -0.24945 | CIN10             |
| 0.960783566 | 0.712618958 | 0.480443903 | 0.084832 | 0.46931  | 2.042264 | None              |
| 0.961286479 | 0.080514417 | 0.976378097 | 0.012086 | -0.24126 | 0.064499 | TOS2              |
| 0.962559904 | 0.019388398 | 0.026915259 | -0.00774 | -0.20016 | 0.421851 | RIX7              |
| 0.962641118 | 0.21006721  | 0.064361732 | -0.00885 | 0.135515 | 0.415622 | RPL24B            |
| 0.962832897 | 0.430199039 | 0.335356848 | -0.00897 | 0.095164 | 0.273109 | COF1              |
| 0.962832897 | 0.539290348 | 0.55529834  | -0.0072  | 0.062351 | 0.1634   | SNC2              |
| 0.962832897 | 0.032604415 | 0.822329423 | -0.00699 | -0.16853 | -0.08722 | NUP57             |
| 0.962832897 | 0.98811108  | 0.848611069 | 0.014523 | -0.01533 | 0.16541  | None              |
| 0.962832897 | 0.223628637 | 0.889649609 | 0.008215 | -0.12514 | 0.079714 | PRP8              |
| 0.962832897 | 0.633674911 | 0.919516515 | -0.01122 | 0.079562 | 0.092632 | MSS2              |
| 0.962832897 | 0.243955921 | 0.996250082 | 0.008001 | -0.11794 | -0.0351  | CAB2              |
| 0.964087023 | 0.422329315 | 0.110596652 | -0.00803 | 0.08783  | 0.350575 | RPS19B            |
| 0.964477636 | 0.604782612 | 1           | 0.013359 | 0.103956 | 0.009098 | YOR111W           |
| 0.967075253 | 0.104382267 | 0.053017966 | -0.00885 | 0.177689 | 0.459803 | CCW12             |
| 0.967930544 | 0.974684047 | 0.556682748 | 0.015691 | -0.02257 | -0.37536 | PEX15             |
| 0.967988867 | 0.032152547 | 0.283510967 | -0.00706 | 0.18199  | 0.246713 | MRPL35            |
| 0.967988867 | 0.887204289 | 0.739091337 | 0.006819 | 0.02131  | -0.11382 | RIM101            |
| 0.968043822 | 0.782040669 | 0.675803696 | -0.00913 | -0.04491 | 0.180517 | TRM9              |
| 0.969377574 | 0.428439515 | 1           | 0.009125 | -0.10591 | 0.033536 | MKK2              |
| 0.969591971 | 0.241759995 | 1           | 0.008902 | -0.14343 | 0.028672 | YKL023C- <i>l</i> |

|             |             |             |          |          |          |           |
|-------------|-------------|-------------|----------|----------|----------|-----------|
| 0.970565528 | 0.97156603  | 0.469423001 | 0.134171 | 0.207395 | -3.7493  | None      |
| 0.970682439 | 0.97156603  | 0.469423001 | 0.133478 | 0.208033 | -3.74798 | None      |
| 0.971558403 | 0.972056407 | 0.357626604 | 0.134184 | 0.207073 | 4.196363 | None      |
| 0.97201705  | 0.972383608 | 0.35748349  | 0.132601 | 0.205518 | 4.199306 | None      |
| 0.972448143 | 0.095674919 | 0.115693287 | -0.00609 | -0.13575 | 0.293803 | KRE33     |
| 0.973379178 | 0.146334441 | 0.179756965 | 0.006582 | -0.13261 | 0.289916 | NCL1      |
| 0.973379178 | 0.592522963 | 0.7456439   | -0.0064  | -0.05754 | 0.113262 | CKA1      |
| 0.973821113 | 0.942225336 | 0.611494739 | -0.02134 | -0.04743 | -0.51149 | NKP2      |
| 0.973821113 | 0.001891522 | 0.644321253 | -0.00842 | -0.32238 | 0.191927 | NUP1      |
| 0.974766905 | 0.368160688 | 0.060851274 | -0.00705 | 0.098799 | 0.397708 | RPL23A    |
| 0.974766905 | 0.868862376 | 0.831867858 | -0.00681 | 0.026054 | -0.09791 | PPH22     |
| 0.974919173 | 0.984533249 | 0.859769494 | 0.018127 | 0.025137 | 0.236075 | YPR170W-I |
| 0.977396327 | 0.384508616 | 0.379660556 | -0.01683 | 0.236482 | -0.58712 | SAP4      |
| 0.977396327 | 0.162566905 | 0.477260495 | 0.007077 | -0.1464  | 0.219604 | SNU114    |
| 0.978812858 | 0.345520596 | 0.712529354 | -0.00739 | -0.11401 | 0.15569  | ELP3      |
| 0.978907715 | 0.865003017 | 0.87163978  | -0.01504 | -0.06226 | 0.196353 | CIT3      |
| 0.981132555 | 0.929321848 | 0.782427464 | 0.009037 | 0.025302 | 0.163263 | YNL234W   |
| 0.981544486 | 0.21659995  | 0.261118505 | 0.007535 | -0.14987 | 0.331153 | EFR3      |
| 0.982601562 | 0.700306657 | 0.662992545 | -0.00995 | -0.07881 | -0.2481  | SP014     |
| 0.982872124 | 0.97156603  | 0.428049321 | -0.00745 | 0.01376  | 0.266334 | CAF20     |
| 0.98300135  | 0.332602552 | 0.90086308  | -0.02173 | 0.36427  | 0.265405 | YFL041W-I |
| 0.983080155 | 1           | 0.255950109 | 0.043248 | 0.026181 | 1.981355 | None      |
| 0.984376987 | 0.387232715 | 0.721913447 | -0.01726 | -0.27038 | -0.38553 | None      |
| 0.986161918 | 0.050398477 | 0.892830092 | 0.006386 | -0.20035 | -0.08491 | ACF2      |
| 0.986193588 | 0.00355233  | 1           | -0.00706 | -0.31081 | -0.01647 | PCF11     |
| 0.987511239 | 0.159387719 | 0.043101043 | -0.00562 | 0.136048 | 0.412194 | RPL26B    |
| 0.987850736 | 0.835898334 | 0.868996053 | -0.01004 | -0.05468 | -0.15319 | CDC6      |
| 0.98805317  | 0.982681213 | 0.676572746 | 0.010909 | 0.018948 | 0.290842 | RRN10     |
| 0.988352753 | 0.151076423 | 0.971609311 | -0.02439 | -0.62352 | 0.207133 | None      |
| 0.988687602 | 1           | 0.968138917 | -0.00443 | -0.00161 | 0.038665 | PMT1      |
| 0.990673232 | 0.208186424 | 0.931568877 | 0.005329 | -0.12542 | -0.06    | BEM1      |
| 0.991003557 | 0.167354676 | 0.353690868 | -0.00984 | -0.25177 | -0.44593 | GEM1      |
| 0.991003557 | 0.446288659 | 1           | 0.005487 | 0.086211 | -0.00289 | VTA1      |
| 0.991268244 | 0.397361658 | 0.60698347  | 0.007558 | 0.130831 | -0.24136 | FLR1      |
| 0.992853766 | 0.584277189 | 0.586097635 | 0.008187 | 0.10269  | -0.27821 | YJR149W   |
| 0.992853766 | 0.389906374 | 0.868427687 | -0.01048 | -0.18997 | -0.1777  | YNL146W   |
| 0.99337691  | 0.412262997 | 1           | 0.017244 | 0.301221 | -0.10325 | YHR130C   |
| 0.993398638 | 0.321710164 | 0.879698394 | 0.007391 | -0.15313 | 0.11963  | NEO1      |
| 0.99461064  | 0.583819577 | 0.697639077 | -0.00419 | -0.05463 | 0.121863 | ECM33     |
| 0.996134332 | 0.17643013  | 0.276489336 | 0.055863 | -1.71563 | 3.77198  | None      |
| 0.996775025 | 0.384709115 | 1           | 0.00656  | -0.12944 | -0.04433 | PRP28     |
| 0.997450618 | 0.319000663 | 0.639357258 | 0.011755 | 0.26293  | -0.40049 | ARR3      |
| 0.997897089 | 0.4952565   | 0.821241649 | -0.00549 | -0.0902  | -0.12067 | TFB4      |
| 0.998182093 | 0.518133314 | 0.775460909 | 0.023615 | 0.370901 | 0.592368 | ECM8      |
| 0.998191836 | 0.563914752 | 0.740905504 | 0.005477 | 0.080144 | -0.15065 | BET2      |
| 0.99920119  | 0.026595764 | 0.888649502 | 0.005086 | -0.22968 | 0.089764 | NUP100    |
| 0.99920119  | 0.904357451 | 1           | 0.033763 | 0.159174 | 0.214195 | None      |
| 1           | 0.010158362 | 0.016453992 | 0.001019 | -0.21918 | 0.45282  | UTP8      |
| 1           | 0.781683071 | 0.048861894 | 0.00237  | 0.074314 | -0.80515 | NBL1      |
| 1           | 0.036499632 | 0.103916575 | 0.002335 | -0.15863 | 0.290276 | KRI1      |
| 1           | 0.354644058 | 0.179756965 | -0.00024 | 0.103161 | 0.324357 | RPL13B    |
| 1           | 0.21877703  | 0.180992827 | 0.001805 | -0.11797 | 0.294541 | YMR310C   |
| 1           | 0.820787111 | 0.189220839 | 0.01104  | -0.08933 | -0.83308 | PAU17     |
| 1           | 0.054181243 | 0.207271346 | 0.003171 | 0.152607 | 0.253893 | RHO1      |

|   |             |             |          |          |          |           |
|---|-------------|-------------|----------|----------|----------|-----------|
| 1 | 0.558891569 | 0.209370481 | 0.006746 | -0.11351 | -0.49348 | YKU80     |
| 1 | 0.435407492 | 0.222234824 | -0.00368 | -0.09008 | -0.30568 | ANB1      |
| 1 | 0.999194287 | 0.223414237 | -0.00076 | -0.00822 | 0.365912 | IST2      |
| 1 | 0.623266105 | 0.287493512 | 0.00412  | 0.062627 | -0.27825 | ADP1      |
| 1 | 1           | 0.334558308 | 0.002317 | 0.001062 | -0.23289 | UTR1      |
| 1 | 0.124795835 | 0.336735207 | -0.00097 | -0.18404 | -0.30418 | NUD1      |
| 1 | 0.805737746 | 0.354608469 | 0.000343 | -0.03056 | 0.214865 | YCR016W   |
| 1 | 0.146651273 | 0.373162993 | -0.00111 | 0.233901 | 0.389716 | TRX3      |
| 1 | 0.439313465 | 0.411534311 | 0.003806 | -0.08453 | -0.2222  | NAM8      |
| 1 | 0.944968744 | 0.41415419  | -0.00494 | 0.017888 | -0.26088 | SAM50     |
| 1 | 0.442222692 | 0.448510963 | 0.002735 | 0.081598 | 0.206947 | ARD1      |
| 1 | 0.302233138 | 0.481039634 | -0.00536 | -0.13488 | -0.2549  | NUP42     |
| 1 | 0.308657113 | 0.498094313 | -0.00493 | 0.158852 | -0.29634 | BUB2      |
| 1 | 0.452827892 | 0.50705979  | 0.002164 | 0.09792  | 0.233767 | MMS2      |
| 1 | 0.667040818 | 0.507578381 | 0.066585 | -0.8973  | 3.148006 | None      |
| 1 | 0.722806559 | 0.519000409 | 0.003712 | -0.04392 | -0.18511 | HRR25     |
| 1 | 0.220446608 | 0.524876758 | -0.00425 | 0.140175 | -0.21776 | RAD30     |
| 1 | 0.239357669 | 0.553808105 | -0.0001  | -0.11353 | 0.17406  | LIA1      |
| 1 | 0.454132404 | 0.587251805 | -0.00487 | -0.15889 | 0.335959 | YJR120W   |
| 1 | 0.027985534 | 0.600468279 | -0.00216 | -0.2615  | -0.22112 | SET2      |
| 1 | 0.984004572 | 0.62830703  | 0.000188 | -0.0098  | -0.16624 | FUI1      |
| 1 | 1           | 0.648620695 | 0.018465 | -0.03941 | -1.16703 | MAM1      |
| 1 | 0.903977193 | 0.651764436 | 0.001567 | 0.031571 | 0.233673 | GIM5      |
| 1 | 0.66730791  | 0.655315289 | 0.053147 | -0.8982  | -2.65804 | None      |
| 1 | 0.124374834 | 0.65746379  | -0.00086 | -0.1399  | 0.146596 | DIS3      |
| 1 | 0.977693292 | 0.664126703 | 0.002374 | 0.010858 | 0.158559 | DOM34     |
| 1 | 0.953675948 | 0.667844098 | -0.00167 | -0.01113 | -0.12115 | ARP2      |
| 1 | 0.758162333 | 0.684923409 | 0.001227 | -0.03812 | 0.136994 | ARI1      |
| 1 | 0.289051446 | 0.689558052 | 0.000895 | 0.149824 | -0.19664 | IBA57     |
| 1 | 0.788420725 | 0.689558052 | -0.00363 | 0.030313 | 0.120947 | TYS1      |
| 1 | 0.254444296 | 0.710200613 | -0.00674 | 0.283193 | 0.335571 | YOL097W-1 |
| 1 | 0.083612522 | 0.721271027 | 0.003836 | -0.16511 | 0.134392 | NMD2      |
| 1 | 0.77606377  | 0.721271027 | 0.00088  | 0.177577 | 0.623497 | SPR28     |
| 1 | 0.918227238 | 0.741851259 | 0.006077 | -0.05801 | -0.38199 | VEL1      |
| 1 | 0.75339767  | 0.764340274 | 0.002312 | -0.05123 | 0.146721 | YML082W   |
| 1 | 0.518133314 | 0.772281426 | 0.015276 | -0.26745 | 0.428963 | PGA2      |
| 1 | 0.996753756 | 0.775856108 | 0.007653 | 0.013945 | -0.22798 | AVO2      |
| 1 | 1           | 0.781154036 | 0.000681 | -0.0006  | -0.14032 | TGL3      |
| 1 | 0.583819577 | 0.785474844 | 0.010322 | 0.365988 | -0.64421 | AHT1      |
| 1 | 0.598147339 | 0.786892522 | 0.005742 | 0.15576  | -0.27888 | GAL3      |
| 1 | 0.024106319 | 0.789517744 | -0.0032  | -0.26954 | -0.146   | RTT107    |
| 1 | 0.028292556 | 0.791580335 | -0.00499 | -0.26325 | -0.14512 | ELM1      |
| 1 | 1           | 0.794208498 | -0.00974 | -0.00549 | -0.27533 | PCI8      |
| 1 | 0.765667428 | 0.862693719 | -0.0023  | 0.044818 | 0.100174 | FRQ1      |
| 1 | 0.354576312 | 0.868996053 | -0.01076 | 0.251076 | -0.2177  | ECM18     |
| 1 | 0.443819937 | 0.886187413 | 0.000718 | -0.12119 | 0.115775 | BET5      |
| 1 | 0.743945088 | 0.89043028  | -0.00289 | -0.0673  | -0.12126 | YGL108C   |
| 1 | 0.224402423 | 0.917145138 | -0.00279 | -0.17351 | 0.095752 | BRR2      |
| 1 | 0.162566905 | 0.93741782  | -0.00393 | -0.18774 | 0.079563 | POL3      |
| 1 | 0.456532916 | 0.95255919  | -0.00216 | 0.120613 | 0.07916  | RCN1      |
| 1 | 0.380565951 | 0.960655888 | 0.002158 | -0.13043 | 0.070883 | AHK1      |
| 1 | 0.640053214 | 0.96218812  | -0.00181 | -0.09581 | -0.08554 | IML1      |
| 1 | 0.176418414 | 0.972387712 | -0.00482 | 0.163561 | 0.056025 | YIP1      |
| 1 | 0.627135065 | 0.979005513 | 0.00049  | -0.06119 | -0.04422 | YBR220C   |

[illegible]



[illegible]

[illegible]

[illegible]

[illegible]

[illegible]

## Descriptio Gene Sum Biological Cellular Cc Molecular KEGG Pathway

Fit3p Mannoprot GO:00158 GO:000927 GO:0003674 molecular\_function  
 Fit2p Mannoprot GO:00158 GO:000927 GO:0003674 molecular\_function  
 Ehd3p 3-hydroxy GO:00090 GO:00057 GO:00038 (sce00410) beta-Alanine metabolism; (sce00640)  
 Flo1lp GPI-anch GO:00440 GO:00059 GO:00036 (sce04011) MAPK signaling pathway - yeast  
 hypotheti Putative GO:00081 GO:00160 GO:0003674 molecular\_function  
 formate (NAD(+)-de GO:00421 GO:00058 GO:00088 (sce00630) Glyoxylate and dicarboxylate metab  
 ATP-bind Plasma me GO:00007 GO:00433 GO:00154 (sce02010) ABC transporters  
 Mf(alpha) Mating pl GO:00007 GO:00003 GO:00007 (sce04011) MAPK signaling pathway - yeast  
 mating pl Mating pl GO:00007 GO:00057 GO:00007 (sce04011) MAPK signaling pathway - yeast  
 elongatic Elongatic GO:00459 (GO:19909 (GO:0003746 translation elongation factor activity; GO:  
 flocculir Lectin-li GO:00005 (GO:000927 GO:0005537 mannose binding; GO:0048029 monosaccharide  
 Flo10p Member of GO:00005 (GO:000927 GO:0005537 mannose binding; GO:0048029 monosaccharide  
 siderophc Transport GO:00447 GO:00003 GO:0015343 siderophore transmembrane transporter acti  
 Cos5p Endosomal GO:00433 GO:00003 GO:0003674 molecular\_function  
 Aga2p Adhesion GO:00007 GO:000927 GO:0050839 cell adhesion molecule binding; GO:0005515  
 alpha-fac Receptor GO:00007 GO:00380 GO:00049 (sce04011) MAPK signaling pathway - yeast  
 alpha-gl High-affi GO:00157 GO:00058 GO:0005364 maltose:proton symporter activity; GO:00053  
 Enb1p Endosomal GO:00156 GO:00331 (GO:0015620 ferric-enterobactin transmembrane transpor  
 aspartyl Aspartyl GO:00007 GO:000927 GO:00041 (sce04011) MAPK signaling pathway - yeast  
 flavohemc Nitric o GO:00462 GO:00104 GO:0016966 nitric oxide reductase activity; GO:0008941  
 Ste3p Receptor GO:00007 GO:00058 GO:00049 (sce04011) MAPK signaling pathway - yeast  
 Sag1p Alpha-ag GO:00007 GO:000927 GO:0050839 cell adhesion molecule binding; GO:0005515  
 hypotheti Putative GO:00081 GO:00055 GO:0003674 molecular\_function  
 Afb1p MATalpha- GO:00007 GO:000927 GO:0003674 molecular\_function  
 phosphoer Phosphoer GO:00060 GO:00058 GO:00046 (M00003) Gluconeogenesis, oxaloacetate => fru  
 hypotheti Protein c GO:00081 GO:00056 GO:0003674 molecular\_function  
 Cos4p Endosomal GO:00433 GO:00003 GO:0003674 molecular\_function  
 lysine--t Lysyl-tRN GO:00064 GO:00058 GO:00048 (sce00970) Aminoacyl-tRNA biosynthesis  
 hypotheti Putative GO:00081 GO:00055 GO:0003674 molecular\_function  
 pyridoxir Member of GO:00086 GO:00055 GO:00363 (sce00750) Vitamin B6 metabolism  
 hypotheti Protein c GO:00081 GO:00160 GO:0003674 molecular\_function  
 thiamine Plasma me GO:19030 GO:00058 GO:1903089 5-amino-1-ribofuranosylimidazole-4-carboxa  
 Mf(alpha) Mating pl GO:00007 GO:00055 GO:00007 (sce04011) MAPK signaling pathway - yeast  
 mating pl Mating pl GO:00007 GO:00057 GO:00007 (sce04011) MAPK signaling pathway - yeast  
 oligo-1, (Major isc GO:00000 GO:00058 GO:00045 (sce00052) Galactose metabolism; (sce00500) St  
 hypotheti Fungal-s GO:00081 GO:00057 GO:0003674 molecular\_function  
 Hmr1p Silenced GO:00075 GO:00056 GO:00037 (sce04113) Meiosis - yeast  
 phenylpyr Phenylpyr GO:00009 GO:00058 GO:00505 (sce00360) Phenylalanine metabolism; (sce0110  
 acetyltr Putative GO:00081 GO:00055 GO:0008870 galactoside O-acetyltransferase activity; G  
 transcri MAL-acti GO:00000 GO:00056 GO:0000981 DNA-binding transcription factor activity,  
 putative Protein c GO:00345 GO:00056 GO:0016657 oxidoreductase activity, acting on NAD(P)H  
 Pgulp Endo-pol GO:00454 GO:00055 GO:00046 (sce00040) Pentose and glucuronate interconve  
 pyridoxir Member of GO:00086 GO:00055 GO:00363 (sce00750) Vitamin B6 metabolism  
 Aqylp Spore-sp GO:00304 GO:00057 GO:0015250 water channel activity; GO:0005372 water tr  
 Ubx6p UBX (ubic GO:00304 GO:00056 GO:0003674 molecular\_function  
 elongatic Elongatic GO:00459 (GO:19909 (GO:0003746 translation elongation factor activity; GO:  
 high-affi High-affi GO:00156 GO:00306 GO:0005375 copper ion transmembrane transporter activ  
 Cos6p Endosomal GO:00433 GO:00003 GO:0003674 molecular\_function  
 cysteine-Beta-lyas GO:00194 GO:00055 GO:00041 (sce00450) Selenocompound metabolism; (sce002  
 alcohol c Glucose-r GO:00009 GO:00057 GO:00040 (sce00350) Tyrosine metabolism; (sce00071) Fat

putative Ferulic εGO:00462εGO:00057εGO:0016831 carboxy-lyase activity;GO:0016830 carbon-c  
 signal sεPutative GO:00066εGO:00003εGO:0005048 signal sequence binding;GO:0042277 peptide  
 Y' elemerHelicase-GO:00081εGO:00055εGO:0004386 helicase activity;GO:0017111 nucleoside-tr  
 Rdtlp Short opεGO:00081εGO:00055εGO:0003674 molecular\_function  
 transcripMAL-actiεGO:00000εGO:00056εGO:0000981 DNA-binding transcription factor activity,  
 putative Protein vGO:00991εGO:00058εGO:0008553 proton-exporting ATPase activity, phosphor  
 protein lPutative GO:00064εGO:00057εGO:0004674 protein serine/threonine kinase activity;G  
 chaperoneDisaggreεGO:000131GO:00723εGO:00435ε(sce04213)Longevity regulating pathway - mul  
 Pho89p Plasma mεGO:00354εGO:00058εGO:0015319 sodium:inorganic phosphate symporter activ  
 mRNA spliCore Sm rGO:00003εGO:00465εGO:19909ε(sce03040)Spliceosome  
 bifuncticBifuncticGO:00009εGO:00057εGO:00338ε(sce00350)Tyrosine metabolism; (sce00071)Fat  
 Fmp45p Integral GO:00304εGO:00451εGO:0003674 molecular\_function  
 ferroxidεFerro-02-GO:003321GO:00335εGO:0005381 iron ion transmembrane transporter activit  
 Cyb2p CytochromGO:00060εGO:00057εGO:00044ε(sce00620)Pyruvate metabolism; (sce01100)Meta  
 Tisl1p mRNA-bincGO:00611εGO:00009εGO:0003730 mRNA 3'-UTR binding;GO:0003729 mRNA bindin  
 2-deoxygl2-deoxyglGO:00060(GO:00056εGO:0003850 2-deoxyglucose-6-phosphatase activity;GO:0  
 phosphogl6-phosphGO:00090εGO:00058εGO:000461(M00006)Pentose phosphate pathway, oxidative  
 translatiTranslatiGO:00064(GO:00058εGO:00190ε(sce03013)RNA transport  
 translatiTranslatiGO:00064(GO:00058εGO:00190ε(sce03013)RNA transport  
 floccularLectin-liGO:00362εGO:00092εGO:0005537 mannose binding;GO:0048029 monosaccharide  
 maltose rMaltose rGO:000001GO:00058εGO:0005352 alpha-glucoside:proton symporter activity;  
 Mrhlp Protein tGO:00342εGO:00059εGO:0005216 ion channel activity;GO:0022838 substrate-  
 Css3p Protein cGO:00081εGO:00055εGO:0003674 molecular\_function  
 alpha-glMaltase (GO:00000εGO:00058εGO:00045ε(sce00052)Galactose metabolism; (sce00500)St  
 Coa2p CytochromGO:003361GO:00057εGO:0003674 molecular\_function  
 putative Protein cGO:00092εGO:19036(GO:00363ε(sce00750)Vitamin B6 metabolism  
 pheromonePheromoneGO:00081εGO:00059εGO:0003674 molecular\_function  
 IMP dehydInosine nGO:00061εGO:00007εGO:00039ε(sce)Guanine ribonucleotide biosynthesis IMP  
 Fmp16p Protein cGO:00081εGO:00057εGO:0003674 molecular\_function  
 Hsp90 fanHsp90 chεGO:003221GO:00092εGO:00426ε(sce04141)Protein processing in endoplasmic  
 glycogen Glycogen GO:00059εGO:00057εGO:00043ε(sce00500)Starch and sucrose metabolism; (sc  
 Pnslp Protein cGO:00158εGO:00058εGO:0015220 choline transmembrane transporter activity  
 translatiTranslatiGO:000641GO:00162εGO:00040ε(sce03013)RNA transport  
 heat shockSmall heεGO:000701GO:00057εGO:00510ε(sce04141)Protein processing in endoplasmic  
 ferric-clFerric rεGO:00158εGO:00058εGO:0052851 ferric-chelate reductase (NADPH) activity;  
 cyanamideCyanamideGO:00188εGO:00055εGO:00188ε(sce00791)Atrazine degradation  
 hypothetiPutative GO:00081εGO:00055εGO:0003674 molecular\_function  
 C-22 sterC-22 sterGO:00066εGO:00057εGO:00002ε(M00102)Ergocalciferol biosynthesis; (sce)Er  
 medium-clAcyl-coerGO:00517εGO:00055εGO:0034321 alcohol 0-octanoyltransferase activity;GO:  
 Hsp30p Negative GO:00327εGO:00057εGO:0005216 ion channel activity;GO:0022838 substrate-  
 hypothetiPutative GO:00081εGO:00055εGO:0003674 molecular\_function  
 Hsp70 fanATPase irGO:00708εGO:00340εGO:00441ε(sce03060)Protein export; (sce04141)Protein  
 Cox26p StabilizεGO:00081εGO:00057εGO:0003674 molecular\_function  
 Tir4p Cell wallGO:00315(GO:00092εGO:0005199 structural constituent of cell wall;GO:000  
 hexokinasHexokinasGO:00324εGO:00057εGO:00191ε(M00549)Nucleotide sugar biosynthesis, gluco  
 alpha-glMaltase (GO:00000εGO:00058εGO:00045ε(sce00052)Galactose metabolism; (sce00500)St  
 SUN familProtein iGO:00315(GO:00092εGO:0003674 molecular\_function  
 Pet10p Protein of unknown function that localizes to lipid particles; localization sugg  
 Css2p Protein cGO:00081εGO:00057εGO:0003674 molecular\_function  
 translatiTranslatiGO:000641GO:00162εGO:00040ε(sce03013)RNA transport  
 amino aciGeneral εGO:00158εGO:00003εGO:0001761 beta-alanine transmembrane transporter act  
 hypothetiDubious cGO:00081εGO:00055εGO:0003674 molecular\_function  
 hexose tiHigh-affiGO:00157εGO:00058εGO:00151ε(sce04113)Meiosis - yeast  
 histone εTetramerGO:00165εGO:00057εGO:00044ε(sce00360)Phenylalanine metabolism

Ecml2p Putative GO:007151;GO:001602;GO:0003674 molecular\_function  
 sterol-binding Sterol binding GO:001591;GO:000032;GO:0032934 sterol binding;GO:0005496 steroid binding;  
 sedoheptulose Transaldolase GO:000905;GO:000565;GO:000480 (M00007) Pentose phosphate pathway, non-oxidative  
 hypothetical Putative GO:005505;GO:000032;GO:0042626 ATPase activity, coupled to transmembrane transport  
 putative Protein c GO:001934;GO:000565;GO:0004121 cystathionine beta-lyase activity;GO:001680  
 Hmx1p ER localized GO:000678;GO:000564;GO:0004392 heme oxygenase (decyclizing) activity;GO:000564  
 hypothetical Putative GO:000815;GO:000557;GO:0003674 molecular\_function  
 hypothetical Putative GO:003352;GO:000557;GO:0008898 S-adenosylmethionine-homocysteine S-methyltransferase  
 Aqy2p Water channel GO:000688;GO:000578;GO:0015250 water channel activity;GO:0005372 water transport  
 Ygplp Cell wall GO:007072;GO:000557;GO:0003674 molecular\_function  
 pheromone Pheromone GO:000815;GO:001602;GO:0003674 molecular\_function  
 lipid-binding Plasma membrane GO:007147;GO:000578;GO:0008289 lipid binding;GO:0005488 binding;GO:0003674  
 cytochrome Cytochrome GO:000612;GO:000578;GO:000905 (sce00920) Sulfur metabolism; (sce01100) Metabolic  
 hypothetical Putative GO:000815;GO:000557;GO:0003674 molecular\_function  
 putative Putative GO:001622;GO:000032;GO:0042626 ATPase activity, coupled to transmembrane transport  
 Atg34p Receptor GO:007121;GO:003427;GO:0030674 protein binding, bridging;GO:0060090 molecular\_function  
 hypothetical Putative GO:000815;GO:000557;GO:0003674 molecular\_function  
 hypothetical Putative GO:000688;GO:000578;GO:0015250 water channel activity;GO:0005372 water transport  
 putative Putative GO:007147;GO:000927;GO:0005199 structural constituent of cell wall;GO:0005199  
 siderophore Ferrioxamine GO:004471;GO:000032;GO:0015344 siderophore uptake transmembrane transport  
 hexose transport High-affinity GO:001578;GO:000032;GO:001514 (sce04113) Meiosis - yeast  
 phosphate High-affinity GO:190472;GO:000032;GO:0097079 selenite:proton symporter activity;GO:0005199  
 cystathionine Peroxisome GO:007121;GO:000578;GO:000412 (sce00450) Selenocompound metabolism; (sce0022838) substrate-  
 Yro2p Protein v GO:003422;GO:000595;GO:0005216 ion channel activity;GO:0022838 substrate-  
 hypothetical Putative GO:000815;GO:000032;GO:0003674 molecular\_function  
 arginine Arginine sucrose GO:000000;GO:000582;GO:000405 (sce00220) Arginine biosynthesis; (sce00250) Arginine  
 hexose transport High-affinity GO:001578;GO:000588;GO:001557 (sce04113) Meiosis - yeast  
 Cyb5p Cytochrome GO:001612;GO:000578;GO:0009055 electron transfer activity;GO:0020037 heme  
 alpha-1,2 Alpha-1,2 GO:004633;GO:000578;GO:000002 (sce00513) Various types of N-glycan biosynthesis  
 dihydroxy Dihydroxy GO:004422;GO:000565;GO:000412 (sce) Uridine monophosphate biosynthesis, glu  
 medium-chain Acyl-coenzyme A GO:005178;GO:000578;GO:0034319 alcohol O-butanoyltransferase activity;GO:000578  
 Cos1p Endosomal GO:004332;GO:000032;GO:0003674 molecular\_function  
 None None None None None None  
 C-5 sterol C-5 sterol GO:000669;GO:000578;GO:000024 (M00102) Ergocalciferol biosynthesis; (sce) Ergocalciferol  
 hypothetical Putative GO:003445;GO:000578;GO:0003924 GTPase activity;GO:0005525 GTP binding;GO:0005525  
 amino acid Amino acid GO:001582;GO:000578;GO:0022893 low-affinity tryptophan transmembrane transport  
 Cos7p Endosomal GO:004332;GO:000032;GO:0038024 cargo receptor activity;GO:0003674 molecular\_function  
 chaperone Oligomer GO:004332;GO:000578;GO:0051787 misfolded protein binding;GO:0016887 ATPase  
 hypothetical Putative GO:000815;GO:000557;GO:0003674 molecular\_function  
 Ego4p Protein c GO:000815;GO:000582;GO:0003674 molecular\_function  
 acid phosphate Constituent GO:004272;GO:003028;GO:000395 (sce00740) Riboflavin metabolism; (sce00730) Thiamine  
 glyceraldehyde Glyceraldehyde GO:000609;GO:000927;GO:000436 (M00002) Glycolysis, core module involving the  
 cytochrome Subunit 1 GO:000612;GO:000578;GO:000412 (sce00190) Oxidative phosphorylation; (sce01100) Oxidative  
 phosphate Phosphate GO:000669;GO:000578;GO:000460 (M00091) Phosphatidylcholine (PC) biosynthesis  
 Nrg2p Transcription GO:190046;GO:003151;GO:0000980 RNA polymerase II distal enhancer sequence  
 putative Putative GO:000609;GO:000557;GO:0018456 aryl-alcohol dehydrogenase (NAD+) activity  
 Gyp8p GTPase-activator GO:000688;GO:000578;GO:0017137 Rab GTPase binding;GO:0005096 GTPase activity  
 None None None None None None  
 catalase Cytosolic GO:007147;GO:000578;GO:000405 (sce00380) Tryptophan metabolism; (sce00630) Tryptophan  
 Pry3p Cell wall GO:001591;GO:000927;GO:0003674 molecular\_function  
 hydroxymethyl HMG-CoA reductase GO:001928;GO:000578;GO:000442 (sce) C5 isoprenoid biosynthesis, mevalonate pathway  
 hypothetical Protein c GO:005511;GO:000582;GO:0016491 oxidoreductase activity;GO:0003824 catalytic  
 aromatic Aromatic GO:001951;GO:000565;GO:008015 (sce00360) Phenylalanine metabolism; (sce00350) Phenylalanine  
 beta-1,3-O-glycosyl GO:003151;GO:000927;GO:0005199 structural constituent of cell wall;GO:0005199



Atg36p Pex3p intG0:003024G0:000577G0:0003674 molecular\_function  
 hypothetiPutative G0:000815G0:001602G0:0003674 molecular\_function  
 methionirS-adenosyG0:000655G0:001045G0:000447(sce)Methionine salvage pathway; (M00034)Metl  
 hypothetiPutative G0:000815G0:001602G0:0005524 ATP binding;G0:0032559 adenylyl ribonucleoti  
 hypothetiPutative G0:000815G0:000565G0:0003674 molecular\_function  
 Ecm22p Sterol reG0:003595G0:004847G0:0000978 RNA polymerase II proximal promoter sequen  
 acetyl-CcAcetyl-CcG0:000665G0:000575G0:000395(sce00072)Synthesis and degradation of keton  
 hypothetiMember ofG0:005511G0:000557G0:0016491 oxidoreductase activity;G0:0003824 catalyt  
 Sma2p Meiosis-sG0:007055G0:000562G0:0003674 molecular\_function  
 siderophcARN familG0:004471G0:000032G0:0015343 siderophore transmembrane transporter acti  
 hypothetiPutative protein of unknown function; SWAT-GFP, seamless-GFP and mCherry fusion  
 DUP240 f2Putative G0:001605G0:000575G0:0003674 molecular\_function  
 Icy1p Protein cG0:000815G0:000032G0:0003674 molecular\_function  
 basic amiPermease G0:199082G0:000032G0:0015174 basic amino acid transmembrane transporter  
 thioredoStress irG0:004274G0:000582G0:0008379 thioredoxin peroxidase activity;G0:0051920  
 ribosomalProtein cG0:000215G0:002262G0:000375(sce03010)Ribosome  
 alcohol cAlcohol cG0:004345G0:000565G0:000405(sce00350)Tyrosine metabolism; (sce00071)Fat  
 PAQR-typeMembrane G0:000685G0:000575G0:0038023 signaling receptor activity;G0:0060089 mol  
 ubiquinolCytochronG0:000612G0:000575G0:004515(sce00190)Oxidative phosphorylation; (sce0110  
 hypothetiProtein cG0:000815G0:000565G0:0003674 molecular\_function  
 long-chaiLong chaiG0:190532G0:000574G0:010235(sce)beta-Oxidation, acyl-CoA synthesis; (M0  
 basic amiPlasma meG0:001585G0:000577G0:0003674 molecular\_function  
 Aim17p Protein cG0:004532G0:000575G0:0016702 oxidoreductase activity, acting on single  
 Suelp Protein iG0:003015G0:000574G0:0003674 molecular\_function  
 Inalp Protein cG0:003155G0:005128G0:0003674 molecular\_function  
 hypothetiPutative G0:000815G0:000032G0:0003674 molecular\_function  
 nicotinatNicotinatG0:003435G0:000078G0:000451(sce00760)Nicotinate and nicotinamide metabo  
 Mlf3p Serine-riG0:003095G0:000582G0:0003674 molecular\_function  
 None None None None None None  
 isopenterIsopenterG0:005095G0:000582G0:000445(sce)C5 isoprenoid biosynthesis, mevalonate  
 hypothetiPutative G0:000815G0:000557G0:0050662 coenzyme binding;G0:0048037 cofactor bindi  
 delta(14)C-14 sterG0:000665G0:003017G0:005061(sce00100)Steroid biosynthesis; (sce01130)Bi  
 Sut2p Zn2Cys6 fG0:190235G0:000565G0:0001103 RNA polymerase II repressing transcription  
 Hsp70 fanHeat shocG0:000661G0:000582G0:004415(sce04213)Longevity regulating pathway - mul  
 Scm4p MitochondG0:000042G0:000574G0:0003674 molecular\_function  
 Sds24p Protein iG0:003007G0:000582G0:0003674 molecular\_function  
 cytochronCytochronG0:000612G0:000575G0:000905(sce00920)Sulfur metabolism; (sce01100)Metab  
 sterol-biSterol biG0:001591G0:000032G0:0015485 cholesterol binding;G0:0032934 sterol bind  
 fatty aciElongase G0:003462G0:003017G0:010275(sce)Fatty acid biosynthesis, elongation, en  
 citrate cCitrate sG0:000655G0:000577G0:000415(M00010)Citrate cycle, first carbon oxidatio  
 glutamineGlutamineG0:003422G0:000557G0:000435(sce00250)Alanine, aspartate and glutamate m  
 sterol esSteryl esG0:001612G0:000581G0:0004771 sterol esterase activity;G0:0016298 lipase  
 succinateAlpha sulG0:000615G0:004264G0:000475(sce00640)Propanoate metabolism; (sce)Citrat  
 Slplp GlycosylG0:003497G0:003017G0:0003674 molecular\_function  
 diphosphcMevalonatG0:001925G0:000582G0:000415(sce)C5 isoprenoid biosynthesis, mevalonate  
 seripaupcProtein cG0:003045G0:000927G0:0005199 structural constituent of cell wall;G0:000  
 ubiquinolSubunit fG0:000612G0:000575G0:000812(sce00190)Oxidative phosphorylation; (sce0110  
 phospholiPutative G0:190532G0:000032G0:0004012 phospholipid-translocating ATPase activity  
 cytochronSubunit lG0:000612G0:000574G0:000412(sce00190)Oxidative phosphorylation; (sce0110  
 flocculirLectin-liG0:003625G0:000927G0:0005537 mannose binding;G0:0048029 monosaccharide  
 ferric/cFerric reG0:001567G0:000032G0:0052851 ferric-chelate reductase (NADPH) activity;  
 ribonuclcRibonuclcG0:000925G0:000597G0:000475(sce00480)Glutathione metabolism; (sce00240)l  
 cytochronSubunit lG0:003361G0:000575G0:000412(sce00190)Oxidative phosphorylation; (sce0110  
 adenine lPotentialG0:004425G0:000575G0:000205(sce00230)Purine metabolism; (sce01100)Metab

Cos12p Endosomal G0:004332 G0:000032 G0:0003674 molecular\_function  
 cytochrome Subunit 1 G0:000612 G0:000575 G0:000412 (sce00190) Oxidative phosphorylation; (sce01100)  
 fluoride Protein 1 G0:190342 G0:000588 G0:1903425 fluoride transmembrane transporter activity  
 ATPase inhibitor Protein 1 G0:003278 G0:000575 G0:0042030 ATPase inhibitor activity; G0:0060590 ATPase  
 pyridoxin Putative G0:004282 G0:000565 G0:005025 (sce00750) Vitamin B6 metabolism; (sce01100) M  
 putative Vacuolar G0:001589 G0:000032 G0:0042626 ATPase activity, coupled to transmembrane  
 Sed1p Major structural G0:003151 (G0:000927 G0:0005199 structural constituent of cell wall; G0:000  
 hypothetical Putative G0:004668 G0:000557 G0:0016491 oxidoreductase activity; G0:0003824 catalytic  
 kynurenin Kynurenin G0:003435 G0:000565 G0:003042 (sce00380) Tryptophan metabolism; (sce01100) M  
 lysophospholipid Phospholipid G0:004647 G0:000927 G0:000462 (sce00564) Glycerophospholipid metabolism  
 cytochrome Putative G0:000131 (G0:000578 G0:000412 (sce00520) Amino sugar and nucleotide sugar metabolism  
 Ten1p Protein 1 G0:003222 (G0:199087 G0:0043047 single-stranded telomeric DNA binding; G0:0  
 D-lactate Major mitochondrial G0:190345 G0:000574 G0:000872 (sce00620) Pyruvate metabolism  
 None None None None None None  
 hypothetical Putative G0:000815 G0:000575 G0:0003674 molecular\_function  
 myo-inositol Myo-inositol G0:001579 G0:000032 G0:0005366 myo-inositol:proton symporter activity; G0:0  
 serine/threonine AGC family G0:000132 G0:000032 G0:000467 (sce04213) Longevity regulating pathway - mul  
 putative Putative G0:000608 G0:000557 G0:0018456 aryl-alcohol dehydrogenase (NAD+) activity  
 Utr2p Chitin 1 G0:000605 G0:000014 G0:0004553 hydrolase activity, hydrolyzing O-glycosyl  
 Hbt1p Shmoo 1 G0:000075 G0:000595 G0:0003674 molecular\_function  
 Sip18p Phospholipid G0:004265 G0:000575 G0:0005543 phospholipid binding; G0:0008289 lipid binding  
 Erg29p Protein 1 G0:000669 G0:000565 G0:0003674 molecular\_function  
 putative Protein 1 G0:004477 G0:000565 G0:0005516 calmodulin binding; G0:0004674 protein serine  
 carbonyl Aldehyde G0:190142 G0:000575 G0:0004090 carbonyl reductase (NADPH) activity; G0:000  
 lumazine Lumazine G0:000925 G0:000934 G0:000091 (sce00740) Riboflavin metabolism; (sce01110) B  
 hydroxymethyl 3-hydroxy G0:001014 G0:000565 G0:000442 (sce00072) Synthesis and degradation of ketone  
 hypothetical Putative G0:000815 G0:000557 G0:0003674 molecular\_function  
 Nej1p Protein 1 G0:004501 (G0:007041 G0:004502 (sce03450) Non-homologous end-joining  
 Tma17p ATPase domain G0:007068 G0:000565 G0:0043023 ribosomal large subunit binding; G0:0043024  
 ribonucleotide Ribonucleotide G0:000926 G0:000597 G0:000472 (sce00480) Glutathione metabolism; (sce00240) L  
 Na(+)/Li(+)-type ATPase G0:004214 G0:000032 G0:0008554 sodium-exporting ATPase activity, phosphor  
 hypothetical Putative G0:000815 G0:000575 G0:0003674 molecular\_function  
 hypothetical Protein of unknown function; non-essential gene; interacts with the DNA helicase  
 hypothetical Putative G0:000815 G0:000578 G0:0003674 molecular\_function  
 hypothetical Protein 1 G0:000815 G0:001602 G0:0003674 molecular\_function  
 sterol 24-Delta(24) G0:000669 G0:000574 G0:000385 (M00102) Ergocalciferol biosynthesis; (sce) Ergocalciferol  
 hypothetical Integral G0:003045 G0:004512 G0:0003674 molecular\_function  
 glutathione Cytosolic G0:001075 G0:000575 G0:000436 (sce00480) Glutathione metabolism  
 phosphoglycerate 3-phosphate G0:190388 G0:000575 G0:000461 (M00002) Glycolysis, core module involving the  
 Om14p Mitochondrial G0:000662 G0:003131 (G0:1990593 nascent polypeptide-associated complex binding  
 ribosomal Ribosomal G0:000218 G0:002262 G0:000375 (sce03010) Ribosome  
 mismatch DNA-binding G0:004351 (G0:003231 G0:0032139 dinucleotide insertion or deletion binding  
 acetyltransferase Acetyltransferase G0:004338 G0:000557 G0:0045462 trichothecene 3-O-acetyltransferase activity  
 hypothetical Putative G0:000815 G0:000557 G0:0003674 molecular\_function  
 Hms1p bHLH protein G0:000712 G0:000565 G0:0046983 protein dimerization activity; G0:0003700 Dimerization  
 Gyp7p GTPase-associated G0:003288 G0:000582 G0:0017137 Rab GTPase binding; G0:0005096 GTPase activity  
 hypothetical Dubious 1 G0:000815 G0:000557 G0:0003674 molecular\_function  
 Dcglp Protein 1 G0:000681 (G0:000557 G0:0003674 molecular\_function  
 cytochrome Subunit 1 G0:000612 G0:000574 G0:000412 (sce00190) Oxidative phosphorylation; (sce01100)  
 mitochondrial Mitochondrial G0:007077 G0:000574 G0:0015183 L-aspartate transmembrane transporter activity  
 peptidyltransferase Peptidyltransferase G0:000041 G0:000582 G0:0016018 cyclosporin A binding; G0:0003755 peptidyltransferase  
 serine/threonine Serine-threonine G0:006141 (G0:000565 G0:0004712 protein serine/threonine/tyrosine kinase activity  
 proteasome Non-ATPase G0:004316 G0:003451 G0:003067 (sce03050) Proteasome  
 mannoprotein Haze-protein G0:003151 (G0:000927 G0:0015926 glucosidase activity; G0:0004553 hydrolase

Fit1p Mannoprotein GO:001585 GO:000927 GO:0005524 ATP binding; GO:0032559 adenylyl ribonucleotide  
 hypothetical Putative GO:000815 GO:000557 GO:0005524 ATP binding; GO:0032559 adenylyl ribonucleotide  
 nicotinate Quinolinate GO:003435 GO:000565 GO:000451 (sce00760) Nicotinate and nicotinamide metabolism  
 transketolase Transketolase GO:000605 GO:000582 GO:000480 (M00007) Pentose phosphate pathway, non-oxidative  
 protein phosphatase Regulator GO:000705 GO:000016 GO:0019888 protein phosphatase regulator activity; GO:0005404  
 D-arabinose NAD-dependent D-arabinose 1-dehydrogenase (NAD) activity GO:007045 GO:000582 GO:0047816 D-arabinose 1-dehydrogenase (NAD) activity  
 Spo21p Component GO:003212 GO:003597 GO:0005198 structural molecule activity; GO:0003674 molecular\_function  
 Snx4p Sorting receptor GO:003445 GO:000004 (GO:003226 (sce04144) Endocytosis  
 cyanamide Cyanamide GO:001885 GO:000557 GO:001885 (sce00791) Atrazine degradation  
 trifunctional Multifunctional GO:000001 (GO:000575 GO:000465 (sce) Histidine biosynthesis, PRPP => histidine  
 methylsterol C-4 methylsterol GO:000665 GO:000575 GO:000025 (sce00100) Steroid biosynthesis; (sce01130) Biosynthesis  
 Dif1p Protein GO:190511 GO:000565 GO:1990846 ribonucleoside-diphosphate reductase inhibitor  
 cytochrome Mitochondrial cytochrome GO:000665 GO:003130 (GO:000412 (sce00520) Amino sugar and nucleotide sugar metabolism  
 calmodulin Calmodulin GO:003455 GO:000575 GO:000465 (Human) (hsa04925) Aldosterone synthesis and secretion  
 Yfh7p Putative GO:001631 GO:000557 GO:0016887 ATPase activity; GO:0017111 nucleoside-triphosphate  
 Y' element Putative GO:000815 GO:000575 GO:0004386 helicase activity; GO:0017111 nucleoside-triphosphate  
 ubiquinol Subunit c GO:000612 GO:000575 GO:000812 (sce00190) Oxidative phosphorylation; (sce01100) Oxidative  
 hypothetical Putative protein of unknown function  
 cytochrome Subunit c GO:000612 GO:000575 GO:000412 (sce00190) Oxidative phosphorylation; (sce01100) Oxidative  
 DUP240 f Putative GO:001605 GO:003066 GO:0003674 molecular\_function  
 putative Mannitol GO:001955 GO:000557 GO:004602 (sce00051) Fructose and mannose metabolism  
 putative Putative GO:000074 GO:000585 GO:0004674 protein serine/threonine kinase activity; GO:0005404  
 hypothetical Protein c GO:000815 GO:000557 GO:0003674 molecular\_function  
 4-amino-4-oxobutanoate Putative GO:000922 GO:000557 GO:000367 (sce00730) Thiamine metabolism; (sce01100) Metabolism  
 hypothetical Putative GO:000815 GO:000557 GO:0003674 molecular\_function  
 hypothetical Protein c GO:000815 GO:000557 GO:0003674 molecular\_function  
 NADH-ubiquinol Mitochondrial NADH dehydrogenase GO:001965 GO:000575 GO:0003954 NADH dehydrogenase activity; GO:0016651 oxidative  
 ribosomal Protein c GO:000215 GO:002262 GO:001984 (sce03010) Ribosome  
 transcriptional Transcriptional GO:000601 GO:000565 GO:0001102 RNA polymerase II activating transcription factor  
 Jsn1p Member of GO:005165 GO:003247 GO:0003729 mRNA binding; GO:0003723 RNA binding; GO:0003723  
 lactoylglutamate Monomeric GO:001924 GO:000565 GO:000445 (sce00620) Pyruvate metabolism  
 aldo-ketoreductase NADPH-dependent GO:003455 GO:000582 GO:0051268 alpha-keto amide reductase activity; GO:0005404  
 hypothetical Protein c GO:000815 GO:000575 GO:0003674 molecular\_function  
 Apd1p Protein c GO:000815 GO:000565 GO:0003674 molecular\_function  
 allantoin Allantoin GO:000944 GO:000575 GO:000405 (sce00230) Purine metabolism; (sce01100) Metabolism  
 hypothetical Putative GO:000815 GO:000565 GO:0003674 molecular\_function  
 Ecm34p Protein c GO:007155 GO:000575 GO:0003674 molecular\_function  
 sterol-4-C-3 sterol GO:000665 GO:000575 GO:000025 (sce00100) Steroid biosynthesis; (sce01130) Biosynthesis  
 seripaupe Cell wall GO:003150 (GO:000927 GO:0005199 structural constituent of cell wall; GO:0005199  
 glucose-1-GID Complex GO:004575 GO:003465 GO:0003674 molecular\_function  
 glucan 1, Major extracellular GO:000922 GO:000927 GO:000435 (sce00500) Starch and sucrose metabolism  
 Ras family GTP-binding GO:200022 GO:000575 GO:000392 (sce04933) AGE-RAGE signaling pathway in diabetic  
 stearyl-Delta(9) GO:000665 GO:003017 GO:000475 (sce01040) Biosynthesis of unsaturated fatty acids  
 GTPase-activator Negative GO:000715 GO:000565 GO:0005096 GTPase activator activity; GO:0030695 GTPase  
 Kti12p Protein GO:000205 GO:003355 GO:0003682 chromatin binding; GO:0005524 ATP binding; GO:0005404  
 Uga4p GABA (gamma-aminobutyric acid) symporter GO:001584 GO:000032 GO:0015495 gamma-aminobutyric acid:proton symporter activity  
 hexose transporter Protein c GO:001575 GO:000585 GO:001557 (sce04113) Meiosis - yeast  
 glycerol Glycerol GO:001955 GO:000575 GO:000435 (sce00561) Glycerolipid metabolism; (sce01100) Metabolism  
 hypothetical Putative GO:000815 GO:000575 GO:0003674 molecular\_function  
 Fus1p Membrane GO:003135 GO:004335 GO:000367 (sce04011) MAPK signaling pathway - yeast  
 putative Glycogen GO:007147 GO:000557 GO:0004674 protein serine/threonine kinase activity; GO:0005404  
 Mg-dependent Magnesium GO:003535 GO:000565 GO:0030946 protein tyrosine phosphatase activity, metal ion dependent  
 succinate Beta subunit GO:000610 (GO:000575 GO:000475 (sce00640) Propanoate metabolism; (sce) Citrate cycle  
 Rcf2p Cytochrome GO:003361 GO:003130 (GO:0003674 molecular\_function

uoporphyrin Uroporphyrin GO:000675 GO:000582 GO:000485 (sce00860) Porphyrin and chlorophyll metabolism  
high-affinity High-affinity GO:007157 GO:000588 GO:0000006 high-affinity zinc transmembrane transport  
hypothetical NADH-dependent GO:190142 GO:000565 GO:0004029 aldehyde dehydrogenase (NAD) activity; GO:0004029  
Bsc1p Protein GO:000815 GO:000557 GO:0003674 molecular\_function  
hypothetical Protein GO:000815 GO:000557 GO:0003674 molecular\_function  
methylglutaryl 3-methylcrotonylcarboxylase GO:000820 GO:000565 GO:004656 (sce00640) Propanoate metabolism; (sce00620) Propanoate metabolism  
squalene Squalene GO:000665 GO:000581 GO:000450 (sce00909) Sesquiterpenoid and triterpenoid biosynthesis  
acetate--Acetyl-CoA synthetase GO:001942 GO:000557 GO:000398 (sce00640) Propanoate metabolism; (sce00680) Propanoate metabolism  
protein kinase Protein kinase GO:000646 GO:000595 GO:0004674 protein serine/threonine kinase activity; GO:0004674  
Mgalp Protein GO:006140 GO:000079 GO:0000978 RNA polymerase II proximal promoter sequence-specific DNA binding  
Dd1p DNA damage-inducible protein GO:004332 GO:000588 GO:0004190 aspartic-type endopeptidase activity; GO:0004190  
bifunctional Farnesyl transferase GO:000665 GO:000574 GO:000431 (sce00909) Sesquiterpenoid and triterpenoid biosynthesis  
C-8 sterol C-8 sterol GO:000665 GO:000578 GO:000024 (M00102) Ergocalciferol biosynthesis; (sce000024) Ergocalciferol biosynthesis  
hypothetical Protein GO:000815 GO:000032 GO:0003674 molecular\_function  
ribosomal Ribosomal GO:000047 GO:003068 GO:000375 (sce03010) Ribosome  
DNA-binding GTB motif GO:007195 GO:003333 GO:0001135 RNA polymerase II transcription regulator activity  
protease ATPase of GO:004585 GO:000854 GO:003640 (sce03050) Proteasome  
putative Putative GO:000655 GO:000582 GO:000434 (M00015) Proline biosynthesis, glutamate => proline  
Hsp90 family Cytoplasmic GO:000045 GO:000927 GO:004262 (sce04141) Protein processing in endoplasmic reticulum  
serine/threonine Ser/Thr kinase GO:006105 GO:004335 GO:0004674 protein serine/threonine kinase activity; GO:0004674  
phosphomevalonate Phosphomevalonate GO:003135 GO:000577 GO:000465 (sce) C5 isoprenoid biosynthesis, mevalonate pathway  
hypothetical Protein GO:000815 GO:000565 GO:0003674 molecular\_function  
ubiquitin Ubiquitin GO:003045 GO:199042 GO:0043008 ATP-dependent protein binding; GO:0031386 protein binding  
Rqc2p Component GO:199011 GO:199011 GO:0043023 ribosomal large subunit binding; GO:0043022 ribosomal large subunit binding  
putative Protein GO:010607 GO:000557 GO:0002196 Ser-tRNA(Ala) hydrolase activity; GO:0002196  
exosome Exosome GO:007110 GO:000017 GO:000372 (sce03018) RNA degradation  
type II I-type II GO:003571 GO:002262 GO:005178 (Human) (hsa04141) Protein processing in endoplasmic reticulum  
2-deoxyglucose 2-deoxyglucose GO:000600 GO:000557 GO:0003850 2-deoxyglucose-6-phosphatase activity; GO:0003850  
meiotic Protein GO:000715 GO:000578 GO:0004029 aldehyde dehydrogenase (NAD) activity; GO:0004029  
hypothetical Putative protein of unknown function; SWAT-GFP fusion protein localizes to the endoplasmic reticulum  
Yap5p Basic leucine zipper GO:001072 GO:000079 GO:0000981 DNA-binding transcription factor activity, sequence-specific DNA binding  
bifunctional AP4A phosphatase GO:000915 GO:000565 GO:000478 (sce00920) Sulfur metabolism; (sce00230) Purine metabolism  
dithiol glutathione GO:001075 GO:000565 GO:0004362 glutathione-disulfide reductase activity; GO:0004362  
Dan1p Cell wall GO:003150 GO:000927 GO:0005199 structural constituent of cell wall; GO:0005199  
indolepyruvate Minor isomer GO:000094 GO:000582 GO:005017 (sce00010) Glycolysis / Gluconeogenesis; (sce000094) Glycolysis / Gluconeogenesis  
protein Meiosis-specific GO:003047 GO:000562 GO:000815 (sce04113) Meiosis - yeast  
ubiquinol Subunit GO:000612 GO:000578 GO:000812 (sce00190) Oxidative phosphorylation; (sce01100) Oxidative phosphorylation  
Grelp Hydrophilic GO:000815 GO:000578 GO:0003674 molecular\_function  
Aqy3p Putative GO:007191 GO:007194 GO:001516 (Human) (hsa04962) Vasopressin-regulated water channel activity  
hypothetical Putative GO:000815 GO:000578 GO:0003674 molecular\_function  
phosphopantothentic Negative GO:001595 GO:007151 GO:0004633 phosphopantothentic cysteine decarboxylase activity  
ubiquinol Subunit GO:000612 GO:000578 GO:000812 (sce00190) Oxidative phosphorylation; (sce01100) Oxidative phosphorylation  
glycerol-DL-glycerol GO:000611 GO:000565 GO:000012 (sce00561) Glycerolipid metabolism; (sce01100) Glycerolipid metabolism  
ubiquinol Ubiquinol GO:000612 GO:000578 GO:000812 (sce00190) Oxidative phosphorylation; (sce01100) Oxidative phosphorylation  
Toh1p GPI-anchored GO:000815 GO:000927 GO:0003674 molecular\_function  
hypothetical Putative GO:000815 GO:003122 GO:0003674 molecular\_function  
phosphatase Plasma membrane GO:007147 GO:000582 GO:0004721 phosphoprotein phosphatase activity; GO:0004721  
Fmp52p Protein GO:005117 GO:000574 GO:0003674 molecular\_function  
fatty acid Sphingolipid GO:000667 GO:000578 GO:0080132 fatty acid alpha-hydroxylase activity; GO:0080132  
hypothetical Putative protein of unknown function; deletion confers sensitivity to 4-(N-(S-glucosyl)-L-threonine)  
phosphoglycyl Homolog GO:000605 GO:000578 GO:000461 (M00002) Glycolysis, core module involving the phosphoglycerate kinase  
Yap6p Basic leucine zipper GO:000012 GO:000565 GO:0001010 RNA polymerase II sequence-specific DNA binding  
None None None None None None  
serine/threonine Serine/threonine GO:006021 GO:003212 GO:000467 (sce04011) MAPK signaling pathway - yeast

alcohol (Alcohol εGO:00342(GO:003017GO:0004026 alcohol 0-acetyltransferase activity;GO:00  
 hypothetiPutative GO:00081εGO:000557GO:0003674 molecular\_function  
 Apq12p Nuclear εGO:00069εGO:00319εGO:0003674 molecular\_function  
 Rho familNon-esserGO:00903εGO:00059εGO:0003924 GTPase activity;GO:0005525 GTP binding;GO:0  
 Cu/Pi carMitochonGO:000687GO:00313(GO:0005375 copper ion transmembrane transporter activ  
 putative UbiquitirGO:001657GO:00057εGO:0004843 thiol-dependent ubiquitin-specific proteas  
 proteasonEssentialGO:000651GO:000854GO:00302ε(sce03050)Proteasome  
 saccharoSaccharoGO:001987GO:00057εGO:00047ε(M00030)Lysine biosynthesis, AAA pathway, 2-  
 Erg28p EndoplasmGO:00066εGO:00057εGO:0030674 protein binding, bridging;GO:0060090 molec  
 Hsp90 cocHsp90 cocGO:00066εGO:00057εGO:00420ε(Human)(hsa05020)Prion diseases  
 Rag GTPasSubunit εGO:190377GO:003444GO:0003924 GTPase activity;GO:0005525 GTP binding;GO:0  
 glutathicPossible GO:00617εGO:00009εGO:0019172 glyoxalase III activity;GO:0016836 hydro-l  
 glycine cH subunitGO:00194εGO:00059εGO:00043ε(sce00630)Glyoxylate and dicarboxylate metab  
 Aif1p MitochonGO:00003(GO:000574GO:0003955 NAD(P)H dehydrogenase (quinone) activity;G  
 Sut1p Zn(II)2CεGO:19023εGO:00056εGO:0001103 RNA polymerase II repressing transcription  
 putative Putative GO:00229(GO:00313(GO:0004174 electron-transferring-flavoprotein dehydro  
 Cos11p Protein εGO:00071εGO:00057εGO:0003674 molecular\_function  
 Zps1p Putative GO:00065(GO:000927GO:0005178 integrin binding;GO:0008237 metallopeptida  
 alcohol (Alcohol εGO:19010εGO:000581GO:0004026 alcohol 0-acetyltransferase activity;GO:00  
 putative Non-esserGO:00060εGO:00058εGO:00191ε(M00549)Nucleotide sugar biosynthesis, gluco  
 putative Protein lGO:000687GO:00056εGO:0004674 protein serine/threonine kinase activity;G  
 Btn2p v-SNARE lGO:00068εGO:00343εGO:0051087 chaperone binding;GO:0000149 SNARE binding  
 hypothetiPseudogerGO:00001εGO:000557GO:0003674 molecular\_function  
 putative Putative GO:00060εGO:000557GO:0018456 aryl-alcohol dehydrogenase (NAD+) activity  
 stress-rεStress-rεGO:00972εGO:00058εGO:00009ε(sce04213)Longevity regulating pathway - mul  
 Cad1p AP-1-likeGO:00360(GO:00056εGO:0001228 DNA-binding transcription activator activi  
 malate syMalate syGO:00060εGO:000951GO:00044ε(M00012)Glyoxylate cycle; (sce)Glyoxylate cy  
 Mix17p MitochonGO:00090εGO:00057εGO:0003674 molecular\_function  
 Mot3p TranscriGO:00108εGO:00007εGO:0001103 RNA polymerase II repressing transcription  
 allantoirAllantoirGO:00157εGO:00003εGO:0005274 allantoin:proton symporter activity;GO:001  
 hypothetiCytoplasmic hydrophilin essential in desiccation-rehydration process; expression  
 low-affirLow-affirGO:00715εGO:00057εGO:0000007 low-affinity zinc ion transmembrane transp  
 Afr1p Protein εGO:00007εGO:00014(GO:0003674 molecular\_function  
 thiamine TransportGO:19030εGO:00003εGO:1903089 5-amino-1-ribofuranosylimidazole-4-carboxa  
 Phd1p TranscriGO:20002εGO:00056εGO:0043565 sequence-specific DNA binding;GO:0003700 D  
 NAD-deperConserveGO:19045εGO:00308εGO:00469ε(sce00760)Nicotinate and nicotinamide metabo  
 Ups2p MitochonGO:20012εGO:003131GO:1990050 phosphatidic acid transporter activity;GO:0  
 tRNA(aderSubunit εGO:00021(GO:005271GO:0052717 tRNA-specific adenosine-34 deaminase activ  
 hypothetiDubious εGO:00081εGO:000557GO:0003674 molecular\_function  
 putative Putative GO:00064εGO:00059εGO:0004674 protein serine/threonine kinase activity;G  
 homeodomεHomeobox-GO:00011εGO:00056εGO:00083(sce04113)Meiosis - yeast  
 guanine rNucleoticGO:00102εGO:00058εGO:00316ε(sce04113)Meiosis - yeast  
 phosphoriPhosphoriGO:004611GO:00056εGO:00089ε(M00549)Nucleotide sugar biosynthesis, gluco  
 Cox15p Protein εGO:00067εGO:000574GO:00041ε(sce00860)Porphyrin and chlorophyll metaboli  
 Cts1p EndochitiGO:00060εGO:000927GO:00088ε(sce00520)Amino sugar and nucleotide sugar m  
 Ncplp NADP-cytεGO:00066εGO:000574GO:0003958 NADPH-hemoprotein reductase activity;GO:00  
 ubiquitirUbiquitirGO:00726ε(Human)G(GO:0004843 thiol-dependent ubiquitin-specific proteas  
 Gdslp Protein εGO:00090εGO:00057εGO:0003674 molecular\_function  
 Dap1p Heme-bincGO:00324εGO:00057εGO:0020037 heme binding;GO:0046906 tetrapyrrole bindi  
 Fralp Protein iGO:00343εGO:00058εGO:0070006 metalloaminopeptidase activity;GO:0004177  
 ribosomalRibosomalGO:00004εGO:00226εGO:00037ε(sce03010)Ribosome  
 histone lHistone lGO:00615εGO:00312εGO:00469ε(Human)(hsa05322)Systemic lupus erythematosu  
 hypothetiNon-esserGO:00081εGO:000557GO:0003674 molecular\_function  
 methionirS-adenosyGO:00065εGO:00104εGO:00044ε(sce)Methionine salvage pathway; (M00034)Metl

Ask10p Regulator GO:009037 GO:000575 GO:0016247 channel regulator activity; GO:0098772 mole  
 Tye7p Serine-ri GO:004582 GO:000079 GO:0043565 sequence-specific DNA binding; GO:0046983 p  
 Y' element Putative GO:000815 GO:000557 GO:0004386 helicase activity; GO:0017111 nucleoside-tr  
 ribosomal Protein GO:000002 GO:002262 GO:007018 (sce03010) Ribosome  
 Glc8p Regulator GO:003251 GO:000565 GO:0004864 protein phosphatase inhibitor activity; GO:  
 1-pyrroli Delta-1-ri GO:001015 GO:000574 GO:000384 (sce00330) Arginine and proline metabolism; (s  
 Ies6p Component GO:005195 GO:003101 GO:0003674 molecular\_function  
 Anlp Subunit GO:000005 GO:000015 GO:000000 (sce) N-glycan biosynthesis, high-mannose typ  
 Opil0p Protein GO:000602 GO:000565 GO:0003674 molecular\_function  
 None None None None None None  
 hypotheti Putative GO:000815 GO:000575 GO:0003674 molecular\_function  
 retromer Vacuolar GO:004505 GO:003090 GO:000856 (sce04144) Endocytosis  
 Hallp Cytoplasm GO:000965 GO:000575 GO:0003674 molecular\_function  
 4-amino- Protein GO:000922 GO:000557 GO:000367 (sce00730) Thiamine metabolism; (sce01100) Meta  
 hypotheti Putative GO:000815 GO:000557 GO:0003674 molecular\_function  
 5-methyl Cobalamir GO:000905 GO:000585 GO:000387 (sce00450) Selenocompound metabolism; (sce002'  
 Irc4p Protein GO:199041 GO:000565 GO:0003674 molecular\_function  
 Bdf2p Protein GO:003145 GO:007194 GO:0001094 TFIID-class transcription factor complex b  
 phospho Enolase GO:003285 GO:000001 GO:000465 (M00002) Glycolysis, core module involving th  
 chaperone Tetradeca GO:004504 GO:004264 GO:000368 (sce03018) RNA degradation  
 3', 5'-cyc High-affi GO:001995 GO:000565 GO:000411 (sce00230) Purine metabolism  
 salt home Serine/ti GO:000685 GO:000565 GO:000472 (sce03015) mRNA surveillance pathway; (sce041  
 chaperone Small he GO:003460 GO:001045 GO:005108 (sce04141) Protein processing in endoplasmic  
 adenyln ATPase GO:001045 GO:000584 GO:000077 (sce04141) Protein processing in endoplasmic  
 pheromone Pheromone GO:001605 GO:000575 GO:0003674 molecular\_function  
 aspartyl Aspartic GO:007145 GO:000927 GO:000415 (sce04011) MAPK signaling pathway - yeast  
 aldehyde Cytoplasm GO:001945 GO:000575 GO:004387 (sce00360) Phenylalanine metabolism; (sce00410  
 ATP-bind Plasma me GO:004290 GO:000585 GO:0008559 xenobiotic transmembrane transporting ATPa  
 Hsp70 fan Heat shock GO:005105 GO:004264 GO:0044183 protein binding involved in protein foldin  
 Cdc37p Essential GO:000016 GO:000575 GO:0051087 chaperone binding; GO:0031072 heat shock pr  
 proteaseon Beta 7 si GO:001045 GO:003451 GO:000425 (sce03050) Proteasome  
 phosphog Tetramer GO:000605 GO:000575 GO:000461 (M00002) Glycolysis, core module involving th  
 Ertlp Transcrip GO:006141 GO:000565 GO:0001227 DNA-binding transcription repressor activi  
 ammonium Ammonium GO:000712 GO:000585 GO:0008519 ammonium transmembrane transporter activit  
 glycogen Glycogen GO:000595 GO:000575 GO:000815 (sce00500) Starch and sucrose metabolism; (s  
 polynucle RNA 5'-tr GO:009850 GO:003155 GO:0004651 polynucleotide 5'-phosphatase activity; GO:  
 palmitoyl Palmitoyl GO:001825 GO:000575 GO:0019706 protein-cysteine S-palmitoyltransferase ac  
 Gfd2p Protein GO:000815 GO:000557 GO:0003676 nucleic acid binding; GO:1901363 heterocycl  
 hypotheti Putative GO:000815 GO:003435 GO:0003674 molecular\_function  
 glycerol-NAD-deper GO:000611 GO:000935 GO:004795 (sce00564) Glycerophospholipid metabolism; (s  
 D-serine D-serine GO:003605 GO:000557 GO:000872 (sce00260) Glycine, serine and threonine metal  
 hypotheti Putative GO:000815 GO:000557 GO:0003674 molecular\_function  
 proteaseon Alpha 7 s GO:001045 GO:003451 GO:000425 (sce03050) Proteasome  
 putative Protein l GO:006025 GO:000565 GO:000467 (Human) (hsa04068) FoxO signaling pathway; (hs  
 Gsf2p Endoplasm GO:003435 GO:003017 GO:0051082 unfolded protein binding; GO:0005515 protei  
 Diglp MAP kinase GO:200021 GO:199052 GO:000815 (sce04011) MAPK signaling pathway - yeast  
 D-lactate 2-hydroxy GO:001951 GO:003125 GO:009961 (sce00620) Pyruvate metabolism  
 beta-fruc Invertase GO:190292 GO:000032 GO:005167 (sce00052) Galactose metabolism; (sce00500) St  
 putative Mannitol GO:001955 GO:000557 GO:004602 (sce00051) Fructose and mannose metabolism  
 ubiquinol Subunit GO:000612 GO:000575 GO:000812 (sce00190) Oxidative phosphorylation; (sce0110  
 ubiquitin Golgi-loc GO:004335 GO:000580 GO:0043130 ubiquitin binding; GO:0032182 ubiquitin-lik  
 putative Putative GO:003361 GO:003131 GO:0004222 metalloendopeptidase activity; GO:0008237 m  
 delta(24-C-24(28) GO:000665 GO:003017 GO:000024 (M00102) Ergocalciferol biosynthesis; (sce) Er  
 bifunctic ER associ GO:001075 GO:000574 GO:000460 (sce00480) Glutathione metabolism

S-glutathione dehydrogenase (ascorbate) activity; GO:009886; GO:000575; GO:0045174  
 glucose-6-phosphate 1,6-bisphosphate phosphatase activity; GO:000609; GO:000575; GO:000434 (M00004) Pentose phosphate pathway (Pentose phosphate pathway); GO:000931; GO:000575; GO:0004573  
 mannosyl-oligosaccharide glucosidase activity; GO:001045; GO:003451; GO:000429 (sce03050) Proteasome  
 phosphoglycerate 3-phosphatase activity; GO:000654; GO:000575; GO:006175 (M00020) Serine biosynthesis, glycerate-3P => serine; GO:003464; GO:003047; GO:0043022  
 ribosome binding; GO:0051015  
 actin filament binding; GO:003571; GO:000927; GO:004418 (sce04213) Longevity regulating pathway - multiple; GO:000815; GO:000581; GO:0003674  
 molecular\_function  
 hypothetical protein; GO:000701; GO:000575; GO:0003674  
 molecular\_function  
 recombination; GO:000071; GO:000022; GO:199081 (sce03440) Homologous recombination  
 ribosomal protein; GO:000215; GO:002262; GO:001984 (sce03010) Ribosome  
 ATP-binding; GO:003537; GO:000588; GO:0042626  
 ATPase activity, coupled to transmembrane potential; GO:004332; GO:000032; GO:0003674  
 molecular\_function  
 Ktillp Zn-ribonuclease activity; GO:001718; GO:000582; GO:0009055  
 electron transfer activity; GO:0005506  
 iron ion binding; GO:000815; GO:000032; GO:0003674  
 molecular\_function  
 hypothetical protein of unknown function; localized to the mitochondrial outer membrane; GO:000815; GO:000557; GO:0003674  
 molecular\_function  
 ubiquinol:ubiquinone oxidoreductase (ubiquinol-ubiquinone); GO:000900; GO:000575; GO:000812 (sce00190) Oxidative phosphorylation; (sce01100) Mitochondrial electron transport, OXPHOS, complex I  
 Msslp Mitochondrial GTPase activity; GO:007085; GO:000574; GO:0003924  
 GTPase activity; GO:0005525  
 GTP binding; GO:0005525  
 phosphoamino acid transferase activity; GO:003422; GO:000565; GO:000461 (sce00520) Amino sugar and nucleotide sugar metabolism; GO:000911; GO:000575; GO:000405 (sce00780) Biotin metabolism; (sce01100) Metabolic process; GO:004316; GO:000565; GO:0003674  
 molecular\_function  
 serine/threonine protein kinase activity; GO:006091; GO:000582; GO:0004674  
 protein serine/threonine kinase activity; GO:003215; GO:000575; GO:0003674  
 molecular\_function  
 Gtt3p Protein; GO:000815; GO:003439; GO:0003674  
 molecular\_function  
 Stp4p Protein; GO:000815; GO:000575; GO:0043565  
 sequence-specific DNA binding; GO:0003677  
 DNA binding; GO:000074; GO:001251; GO:0003674  
 molecular\_function  
 SNAP receptor activity; GO:000001; GO:000032; GO:0005484  
 SNAP receptor activity; GO:0000149  
 SNARE binding; GO:000815; GO:000575; GO:0003674  
 molecular\_function  
 putative cell wall glucanase activity; GO:000074; GO:000927; GO:0042973  
 glucan endo-1,3-beta-D-glucosidase activity; GO:004341; GO:000575; GO:000405 (sce00791) Atrazine degradation; (sce00220) Atrazine degradation; GO:001598; GO:000027; GO:004696 (sce00190) Oxidative phosphorylation; (sce01100) Mitochondrial electron transport, OXPHOS, complex I  
 ERME5 complex; GO:004504; GO:003286; GO:012001 (sce04139) Mitophagy - yeast  
 Luc7p Essential; GO:000637; GO:000568; GO:0003729  
 mRNA binding; GO:0003723  
 RNA binding; GO:0003723  
 ribosomal protein; GO:004591; GO:002262; GO:001984 (sce03010) Ribosome  
 proteasome; GO:001045; GO:003451; GO:006115 (sce03050) Proteasome  
 Rrm3p DNA helicase activity; GO:009704; GO:000572; GO:0043141  
 ATP-dependent 5'-3' DNA helicase activity; GO:000815; GO:000582; GO:0003674  
 molecular\_function  
 protein-coupled receptor signaling pathway; GO:006056; GO:000582; GO:003524 (Human) (hsa04922) Glucagon signaling pathway; GO:003451; GO:000574; GO:004315 (sce04141) Protein processing in endoplasmic reticulum; GO:000022; GO:000557; GO:000405 (sce00230) Purine metabolism; (sce01100) Metabolic process; GO:004635; GO:000575; GO:000410 (M00010) Citrate cycle, first carbon oxidation cycle; GO:000815; GO:001602; GO:0003674  
 molecular\_function  
 bifunctional acetyltransferase activity; GO:007126; GO:000588; GO:000396 (sce00920) Sulfur metabolism; (sce00270) Cysteine metabolism; GO:000815; GO:001602; GO:0003674  
 molecular\_function  
 cleavage; GO:009878; GO:000584; GO:003600 (sce03015) mRNA surveillance pathway  
 Snu7lp Component; GO:000835; GO:000568; GO:0003723  
 RNA binding; GO:0003676  
 nucleic acid binding; GO:000654; GO:003439; GO:000435 (sce00910) Nitrogen metabolism; (sce00220) Arginine metabolism; GO:007236; GO:000565; GO:0000978  
 RNA polymerase II proximal promoter sequence-specific DNA binding; GO:001586; GO:000574; GO:0005471  
 ATP:ADP antiporter activity; GO:0015217  
 ADP:ATP antiporter activity; GO:003254; GO:000576; GO:004302 (sce03010) Ribosome  
 pyruvate decarboxylase activity; GO:000605; GO:000588; GO:000474 (sce) Guanine ribonucleotide biosynthesis IMP dehydrogenase activity; GO:000612; GO:000574; GO:000412 (sce00190) Oxidative phosphorylation; (sce01100) Mitochondrial electron transport, OXPHOS, complex I  
 NADPH-dependent Conserve; GO:190131; GO:000575; GO:0003958  
 NADPH-hemoprotein reductase activity; GO:0003958

triose-ph Triose p GO:00195 GO:00057 GO:00048 (M00002) Glycolysis, core module involving the  
lysophospho Lyso-phos GO:00359 GO:00313 GO:00471 (sce00564) Glycerophospholipid metabolism  
protease ATPase o GO:00706 GO:00085 GO:00364 (sce03050) Proteasome  
phosphatid Phosphatid GO:00439 GO:00715 GO:0008526 phosphatidylinositol transporter activity;  
Avt3p Vacuolar GO:00329 GO:00003 GO:00151 (sce04138) Autophagy - yeast  
ribonucle Minor is GO:00092 GO:00059 GO:00047 (sce00480) Glutathione metabolism; (sce00240)  
phytocer Alkaline GO:00465 GO:00325 GO:00707 (sce00600) Sphingolipid metabolism; (sce01100)  
superoxide Cytosolic GO:00013 GO:00057 GO:00047 (sce04213) Longevity regulating pathway - mul  
Rfulp Protein t GO:00109 GO:00057 GO:0061578 Lys63-specific deubiquitinase activity; GO:  
protease Subunit c GO:00432 GO:00345 GO:00316 (sce03050) Proteasome  
None None None None None None  
hypotheti Putative GO:00081 GO:00055 GO:0003674 molecular\_function  
type 1 p Regulator GO:00514 GO:00001 GO:0004865 protein serine/threonine phosphatase inhib  
pantoate-Pantother GO:00333 GO:00056 GO:00045 (sce00410) beta-Alanine metabolism; (sce00770)  
hypotheti Putative GO:00081 GO:00055 GO:0003674 molecular\_function  
Rcflp Cytochrome GO:00972 GO:00313 GO:0003674 molecular\_function  
NADH-ubiqu Mitochondr GO:00196 GO:00057 GO:0003954 NADH dehydrogenase activity; GO:0016651 oxi  
She4p Protein c GO:00075 GO:00057 GO:0017022 myosin binding; GO:0008092 cytoskeletal pro  
hypotheti Putative protein with similarity to allantoin permease; similar to the allantoin  
MscLp Protein c GO:00071 GO:00057 GO:0003674 molecular\_function  
histone H Histone I GO:00615 GO:00312 GO:0046982 protein heterodimerization activity; GO:004  
hypotheti Protein c GO:00081 GO:00055 GO:0003674 molecular\_function  
polyamine Polyamine GO:00462 GO:00057 GO:00529 (sce00410) beta-Alanine metabolism; (sce00330)  
Hor7p Protein c GO:00070 GO:00003 GO:0003674 molecular\_function  
fluoride Protein i GO:19034 GO:00058 GO:1903425 fluoride transmembrane transporter activit  
protease ATPase o GO:00458 GO:00085 GO:00316 (sce03050) Proteasome  
hypotheti Putative protein of unknown function; predicted to have thiol-disulfide oxidore  
hypotheti Putative GO:00081 GO:00057 GO:0003674 molecular\_function  
None None None None None None  
proteolip Proteolip GO:00327 GO:00003 GO:0030234 enzyme regulator activity; GO:0098772 molec  
transcrip TFIIF (T GO:00011 GO:00056 GO:00011 (sce03022) Basal transcription factors  
Whi2p Protein i GO:00004 GO:00719 GO:0019211 phosphatase activator activity; GO:0019208  
protease ATPase o GO:00458 GO:00085 GO:00364 (sce03050) Proteasome  
hypotheti Putative protein of unknown function  
U4/U6-U5 Splicing GO:00002 GO:00056 GO:00037 (sce03040) Spliceosome  
aldehyde Cytosolic GO:00067 GO:00057 GO:00337 (sce00410) beta-Alanine metabolism; (sce00280)  
glutathione Phospholip GO:00988 GO:00313 GO:00470 (sce00590) Arachidonic acid metabolism; (sce00  
NAD(+) di NADH dip GO:00196 GO:00057 GO:00002 (sce00760) Nicotinate and nicotinamide metabo  
Sok2p Nuclear i GO:00071 GO:00058 GO:00435 (sce04113) Meiosis - yeast  
Lsb1p Negative GO:00343 GO:00304 GO:0051015 actin filament binding; GO:0035091 phosphat  
ribosomal Ribosomal GO:00021 GO:00226 GO:00198 (sce03010) Ribosome  
Earlp Specifici GO:00433 GO:00100 GO:0003674 molecular\_function  
ubiquitin Ubiquitin GO:00315 GO:00057 GO:0004842 ubiquitin-protein transferase activity; GO:  
hypotheti Putative GO:00081 GO:00057 GO:0003674 molecular\_function  
hypotheti Putative GO:00350 GO:00704 GO:0004402 histone acetyltransferase activity; GO:0061  
Yimlp Protein c GO:00069 GO:00058 GO:0003674 molecular\_function  
putative Protein t GO:00007 GO:00330 GO:00001 (sce03440) Homologous recombination  
cyclin C1 cyclin GO:00003 GO:00003 GO:00165 (sce04011) MAPK signaling pathway - yeast; (s  
Rsnlp Membrane GO:00068 GO:00003 GO:0005227 calcium activated cation channel activity;  
Srllp Mannoprote GO:00315 GO:00059 GO:0003674 molecular\_function  
cystinosis Protein i GO:00158 GO:00003 GO:0015184 L-cystine transmembrane transporter activi  
None None None None None None  
Fen2p Plasma m GO:00987 GO:00003 GO:0015233 pantothenate transmembrane transporter act  
3-keto-s13-keto s1 GO:00066 GO:00057 GO:00002 (sce00100) Steroid biosynthesis; (sce01130) Bi



Csilp Subunit cGO:00007fGO:00081fGO:0003674 molecular\_function  
 AAA familAAA ATPaGO:19901fGO:00008fGO:00315f(sce04141)Protein processing in endoplasmic :  
 Bud13p Subunit cGO:00002fGO:00702fGO:0003674 molecular\_function  
 Leelp Zinc-fingGO:00081fGO:00055fGO:0046872 metal ion binding;GO:0043169 cation bindin  
 Nurlp Protein iGO:00430(GO:00343fGO:0003674 molecular\_function  
 Mix23p MitochondGO:00081fGO:00057fGO:0003674 molecular\_function  
 Sol1p Protein vGO:00090fGO:00056fGO:00170f(M00006)Pentose phosphate pathway, oxidative  
 tyrosine Nuclear iGO:00001fGO:00056fGO:00047f(sce04011)MAPK signaling pathway - yeast  
 mitochondMitochondGO:00000fGO:00057fGO:00198f(sce03010)Ribosome  
 diacylglyCholinepGO:00066fGO:00057fGO:00041f(sce)Phosphatidylcholine (PC) biosynthesis, c  
 Mic27p ComponentGO:00324fGO:00616fGO:0003674 molecular\_function  
 Rgmlp Putative GO:00459fGO:00007fGO:0000981 DNA-binding transcription factor activity,  
 dihydroxyDihydroxyGO:00195fGO:00058fGO:00503f(sce00051)Fructose and mannose metabolism; (c  
 porin POFMitochondGO:00510fGO:00313(GO:00152f(Human) (hsa04216)Ferroptosis; (hsa05012)Park  
 histone fHistone fGO:00709fGO:00435(GO:00314f(Human) (hsa05322)Systemic lupus erythematosu  
 6-phosph6-phosphGO:00090fGO:00058fGO:00170f(M00006)Pentose phosphate pathway, oxidative  
 Bol3p Protein iGO:01060fGO:00057fGO:0003674 molecular\_function  
 protein sProtein sGO:00064fGO:00058fGO:00047f(Human) (hsa04010)MAPK signaling pathway  
 hypothetiProtein cGO:00081fGO:00198fGO:0043022 ribosome binding;GO:0043021 ribonucleoprot  
 Hsv2p PhosphatiGO:00344fGO:00340fGO:0010314 phosphatidylinositol-5-phosphate binding;G  
 Punlp Plasma meGO:00315(GO:00512fGO:0003674 molecular\_function  
 hypothetiPutative GO:00081fGO:00055fGO:0003674 molecular\_function  
 glutamateGlutamateGO:00065fGO:00058fGO:00043f(sce00430)Taurine and hypotaurine metabolism  
 DUP240 fPutative GO:00160fGO:00057fGO:0003674 molecular\_function  
 hypothetiPutative protein of unknown function; the authentic, non-tagged protein is detec  
 hypothetiPutative GO:00081fGO:00057fGO:0003674 molecular\_function  
 rRNA-procProtein cGO:00004fGO:00306fGO:0003674 molecular\_function  
 mevalonatMevalonatGO:00101fGO:00058fGO:00044f(sce)C5 isoprenoid biosynthesis, mevalonate j  
 hypothetiPutative GO:00464fGO:00057fGO:0003674 molecular\_function  
 thioredoNuclear tGO:00988fGO:00007fGO:0008379 thioredoxin peroxidase activity;GO:0051920  
 nicotinanHigh-affiGO:00342fGO:00058fGO:0034257 nicotinamide riboside transmembrane transp  
 hypothetiPutative GO:00081fGO:00055fGO:0003674 molecular\_function  
 thiosulfThiosulfGO:00081fGO:00057fGO:0004792 thiosulfate sulfurtransferase activity;GO:0  
 Rab GTPaGTPase-acGO:00706fGO:00001fGO:0017137 Rab GTPase binding;GO:0005096 GTPase activ  
 hypothetiProtein cGO:00081fGO:00056fGO:0003674 molecular\_function  
 Cos9p EndosomalGO:00433fGO:00057fGO:0003674 molecular\_function  
 hypothetiPutative GO:00081fGO:00059fGO:0003674 molecular\_function  
 Cup9p HomeodomGO:00359fGO:00056fGO:0001103 RNA polymerase II repressing transcription  
 protein lSerine/tfGO:19025fGO:00056fGO:00046f(sce04113)Meiosis - yeast  
 proteasomEssentialGO:00432fGO:00345fGO:00051f(sce03050)Proteasome  
 Mth1p Negative GO:19046fGO:00055fGO:0003674 molecular\_function  
 None None None None None None  
 Jlp2p Protein cGO:00081fGO:00057fGO:0003674 molecular\_function  
 Liflp ComponentGO:00063(GO:00328(GO:00036f(sce03450)Non-homologous end-joining  
 F1F0 ATP Subunit fGO:00159fGO:00002fGO:00469f(sce00190)Oxidative phosphorylation; (sce011  
 hypothetiPutative GO:00081fGO:00003fGO:0003674 molecular\_function  
 Tim21p NonessentGO:00301fGO:00057fGO:0003674 molecular\_function  
 guanine rGuanine rGO:00000fGO:00058fGO:0043130 ubiquitin binding;GO:0032182 ubiquitin-lik  
 Ecm29p Scaffold GO:00432fGO:00005(GO:0032947 protein-containing complex scaffold activi  
 Agalp AnchorageGO:00007fGO:00092fGO:0050839 cell adhesion molecule binding;GO:0005515  
 Pfk26p 6-phosphGO:00060(GO:00058fGO:00038f(sce00051)Fructose and mannose metabolism  
 Tcal7p ComponentGO:00344fGO:19900fGO:0003674 molecular\_function  
 None None None None None None  
 homoisociHomo-isocGO:00198fGO:00057fGO:00470f(sce)Lysine biosynthesis, 2-oxoglutarate => :

ubiquinol Subunit 2 GO:000612 GO:003006 GO:000812 (sce00190) Oxidative phosphorylation; (sce0110)

Npl4p Substrate GO:007267 GO:000085 GO:004315 (sce04141) Protein processing in endoplasmic :  
putative Putative GO:000608 GO:000557 GO:0018456 aryl-alcohol dehydrogenase (NAD+) activity

Shu2p Component GO:000075 GO:009719 GO:0003674 molecular\_function

acetolact Regulator GO:000905 GO:000594 GO:000398 (sce00660) C5-Branched dibasic acid metabolism

hexose t1 Low-affir GO:001575 GO:000588 GO:000535 (sce04113) Meiosis - yeast

F1F0 ATP Subunit 5 GO:001598 GO:000027 GO:004695 (sce00190) Oxidative phosphorylation; (sce0110)

TFIIH/NEF Subunit c GO:007081 GO:000567 GO:006165 (sce03022) Basal transcription factors; (sce0:

Bnslp Protein c GO:005135 GO:000557 GO:0003674 molecular\_function

Aep2p Mitochondrion GO:007012 GO:000575 GO:0003723 RNA binding; GO:0003676 nucleic acid bindin

histone H Histone H GO:006158 GO:003129 GO:004698 (Human) (hsa05322) Systemic lupus erythematosu

protease on ATPase o GO:007065 GO:003451 GO:003640 (sce03050) Proteasome

Mrx12p Protein t GO:000815 GO:000575 GO:0003674 molecular\_function

protease on Alpha 6 s GO:001045 GO:003451 GO:000429 (sce03050) Proteasome

Im12p Protein r GO:007121 GO:000574 GO:0003674 molecular\_function

hexose t1 Low affir GO:001575 GO:000588 GO:001557 (sce04113) Meiosis - yeast

DNA-direct RNA polyn GO:004275 GO:000566 GO:000105 (sce03020) RNA polymerase; (sce00240) Pyrimidin

hypotheti Putative GO:000815 GO:000557 GO:0003674 molecular\_function

acid phos One of t GO:001631 GO:000927 GO:000395 (sce00740) Riboflavin metabolism; (sce00730) Tl

methylate DNA repai GO:000630 GO:000565 GO:0003908 methylated-DNA-[protein]-cysteine S-methyl

glycine c T subunit GO:001946 GO:000596 GO:000437 (sce00670) One carbon pool by folate; (sce006:

protein p UBX domai GO:003115 GO:000582 GO:001988 (sce04141) Protein processing in endoplasmic :  
hypotheti Putative GO:000815 GO:000557 GO:0003674 molecular\_function

tRNA spli Subunit c GO:000037 GO:000021 GO:0000213 tRNA-intron endonuclease activity; GO:00168

Yiglp Protein t GO:000611 GO:000582 GO:0003674 molecular\_function

trehalose Large su GO:007041 GO:000594 GO:000382 (sce00500) Starch and sucrose metabolism; (sc

Diclp Mitochondrion GO:190235 GO:000574 GO:001515 (Human) (hsa04964) Proximal tubule bicarbonate

alcohol c Mitochondrion GO:000094 GO:000575 GO:000402 (sce00350) Tyrosine metabolism; (sce00071) Fat

hypotheti Protein c GO:000815 GO:000557 GO:0003674 molecular\_function

mitochondrion Mitochondrion GO:003254 GO:000576 GO:0003735 structural constituent of ribosome; GO:0005

glucosami Glucosami GO:000604 GO:000575 GO:000434 (sce00520) Amino sugar and nucleotide sugar m

H(+)-trar Subunit f GO:000705 GO:000022 GO:004696 (sce04145) Phagosome; (sce00190) Oxidative pho

lipid-bir Eisosome GO:009744 GO:003628 GO:0008289 lipid binding; GO:0005488 binding; GO:000367

bifuncti Methylene GO:000665 GO:003196 GO:000460 (M00091) Phosphatidylcholine (PC) biosynthesi

DNA-direct RNA polyn GO:006021 GO:000566 GO:000396 (sce03020) RNA polymerase; (sce00240) Pyrimidin

glutamine Component GO:000654 GO:006167 GO:0004044 amidophosphoribosyltransferase activity; GO

Fat3p Protein r GO:001598 GO:005128 GO:0003674 molecular\_function

Pai3p Cytoplasm GO:000705 GO:000577 GO:0019828 aspartic-type endopeptidase inhibitor acti

Sddl Protein c GO:000815 GO:000557 GO:0003674 molecular\_function

3' (2'), 5' Bisphosph GO:000908 GO:000565 GO:000845 (sce00920) Sulfur metabolism; (sce01130) Biosyn

Mirlp Mitochondrion GO:003545 GO:003130 GO:0005315 inorganic phosphate transmembrane transpor

3-dehydr 3-ketospl GO:000666 GO:000574 GO:004756 (sce00600) Sphingolipid metabolism; (sce01100)

glucose-i Subunit c GO:000705 GO:003465 GO:0003674 molecular\_function

glutathic Methylgly GO:001924 GO:001045 GO:0019172 glyoxalase III activity; GO:0016836 hydro-1

Sap185p Protein t GO:000205 GO:0005739 mitochondrion; GO:0044444 cytoplasmic part; GO:000573

Ies3p Subunit c GO:004276 GO:003101 GO:0003674 molecular\_function

F1F0 ATP Subunit l GO:001598 GO:000027 GO:004695 (sce00190) Oxidative phosphorylation; (sce0110)

hypotheti Putative GO:000815 GO:003122 GO:0003674 molecular\_function

Maglp 3-methyl- GO:000630 GO:003295 GO:005282 (sce03410) Base excision repair

Edslp Putative GO:000635 GO:000565 GO:0000981 DNA-binding transcription factor activity,

Sro9p Cytoplasmic RNA-b GO:001045 GO:0003729 mRNA binding; GO:0003723 RNA binding; GO:000

inositol Inositol GO:000602 GO:000557 GO:005285 (sce00562) Inositol phosphate metabolism; (sc

protein p Regulator GO:000705 GO:000015 GO:000472 (sce03015) mRNA surveillance pathway; (sce041

Tgllp Steryl es GO:001612 GO:000581 GO:000477 (sce00100) Steroid biosynthesis

argininos Argininos GO:004245 GO:000582 GO:000405 (sce00220) Arginine biosynthesis; (sce00250) A  
 putative Member of GO:199087 GO:000588 GO:004836 (sce04011) MAPK signaling pathway - yeast  
 DUP240 f Putative GO:001605 GO:000032 GO:0003674 molecular\_function  
 branched-Cytosolic GO:001951 GO:000575 GO:005265 (sce) Valine/isoleucine biosynthesis, pyruvate  
 ATP-binding Plasma m GO:004661 GO:000588 GO:0042626 ATPase activity, coupled to transmembrane  
 4-hydroxy Para hyd GO:000674 GO:003131 GO:000841 (M00128) Ubiquinone biosynthesis, eukaryotes,  
 mitochondr Mitochondr GO:003254 GO:000576 GO:000375 (sce03010) Ribosome  
 Far8p Protein i GO:000032 GO:000575 GO:0003674 molecular\_function  
 acireduct Acireduct GO:001951 GO:000565 GO:001030 (sce) Methionine salvage pathway; (M00034) Met  
 Hsp70 fan ATPase ir GO:000661 GO:000582 GO:004418 (sce04213) Longevity regulating pathway - mul  
 Mnn4p Putative GO:000645 GO:001602 GO:0008047 enzyme activator activity; GO:0030234 enzym  
 phosphati Phosphati GO:003605 GO:003535 GO:0043813 phosphatidylinositol-3,5-bisphosphate 5-ph  
 Taf13p TFIID su GO:005112 GO:000566 GO:001625 (sce03022) Basal transcription factors  
 hypotheti Protein c GO:000815 GO:000565 GO:0003674 molecular\_function  
 chitin s Chitin s GO:000091 GO:004500 GO:000410 (sce00520) Amino sugar and nucleotide sugar m  
 hypotheti Putative protein of unknown function; green fluorescent protein (GFP)-fusion pro  
 mitochondr Mitochondr GO:003254 GO:000576 GO:0003735 structural constituent of ribosome; GO:0005  
 protein-l Lysine m GO:001802 GO:000575 GO:0016279 protein-lysine N-methyltransferase activit  
 Gat1p Transcri GO:000108 GO:000565 GO:0000978 RNA polymerase II proximal promoter sequen  
 Nsg2p Protein i GO:001612 GO:000575 GO:0051082 unfolded protein binding; GO:0005515 protei  
 Rsf2p Zinc-fing GO:000012 GO:000079 GO:0000981 DNA-binding transcription factor activity,  
 hypotheti Putative GO:000815 GO:000565 GO:0003674 molecular\_function  
 Siplp Alternat GO:200022 GO:003158 GO:0004679 AMP-activated protein kinase activity; GO:0  
 glucan 1, Glucosid GO:007088 GO:001717 GO:003391 (sce) N-glycan precursor trimming; (M00073) N-  
 None None None None None None  
 Ecml3p Non-esser GO:007155 GO:000557 GO:0003674 molecular\_function  
 glucokin Glucokin GO:004632 GO:000582 GO:001915 (M00549) Nucleotide sugar biosynthesis, gluco  
 Rsalp Protein i GO:000045 GO:000565 GO:0003674 molecular\_function  
 DNA-direct Mitochondr GO:000626 GO:003424 GO:0003896 DNA primase activity; GO:0001018 mitochondr  
 cAMP-depe cAMP-depe GO:001066 GO:000595 GO:000465 (sce04213) Longevity regulating pathway - mul  
 hypotheti Putative GO:000815 GO:000557 GO:0003674 molecular\_function  
 6-phosph Alpha su GO:006162 GO:000594 GO:000387 (sce00051) Fructose and mannose metabolism; (c  
 carbamoyl Small su GO:000652 GO:000595 GO:000408 (sce) Uridine monophosphate biosynthesis, glu  
 trifuncti Trifuncti GO:000922 GO:000582 GO:005035 (sce00730) Thiamine metabolism; (sce01100) Met  
 ESCRT-III One of f GO:190466 GO:000081 GO:000551 (sce04144) Endocytosis  
 proteason ATPase o GO:004585 GO:000854 GO:003640 (sce03050) Proteasome  
 sphingoli Protein t GO:190006 GO:003535 GO:0003674 molecular\_function  
 hypotheti Fungal-s GO:000815 GO:000557 GO:0003674 molecular\_function  
 ubiquitir Multiubiq GO:001095 GO:000050 GO:003445 (sce04120) Ubiquitin mediated proteolysis  
 None None None None None None  
 G proteir G proteir GO:000075 GO:012017 GO:003168 (sce04011) MAPK signaling pathway - yeast  
 Bro1p Cytoplas GO:190466 GO:001000 GO:0035800 deubiquitinase activator activity; GO:00165  
 Arc35p Subunit c GO:003431 GO:003047 GO:000520 (sce04144) Endocytosis  
 hexadecer Dehydroge GO:003215 GO:003131 GO:001848 (sce00410) beta-Alanine metabolism; (sce00280)  
 Mix14p Mitochondr GO:000906 GO:000575 GO:0003674 molecular\_function  
 glutamate Gamma-gli GO:005512 GO:000565 GO:000435 (M00015) Proline biosynthesis, glutamate => p  
 Mnd1p Protein i GO:000715 GO:000079 GO:0003690 double-stranded DNA binding; GO:0003677 DNA  
 Bzz1p SH3 domai GO:004501 GO:003047 GO:0008047 enzyme activator activity; GO:0030234 enzym  
 proteason Subunit c GO:000032 GO:003451 GO:000551 (sce03050) Proteasome  
 putative Putative GO:000676 GO:000575 GO:000884 (M00126) Tetrahydrofolate biosynthesis, GTP =  
 Ltv1p Component GO:190466 GO:003444 GO:0003674 molecular\_function  
 Mif2p Protein i GO:005145 GO:000077 GO:0019237 centromeric DNA binding; GO:1990837 sequenc  
 threonine Threonine GO:000908 GO:000565 GO:000475 (M00018) Threonine biosynthesis, aspartate =>  
 Na(+)-exp P-type A1 GO:009915 GO:000575 GO:0008554 sodium-exporting ATPase activity, phosphor

4-aminobu Gamma-ami GO:00094 GO:00057 GO:00343 (sce) GABA (gamma-Aminobutyrate) shunt; (M000:  
 Shc1p Sporulat GO:00060 GO:00056 GO:0008047 enzyme activator activity; GO:0030234 enzym  
 asparagir Asparagir GO:00709 GO:00058 GO:00040 (sce00250) Alanine, aspartate and glutamate m  
 Mdg1p Plasma me GO:00007 GO:00451 GO:0003674 molecular\_function  
 ATPase-ac Essential GO:19026 GO:00306 GO:00016 (sce03010) Ribosome  
 proline p Proline p GO:00355 GO:00058 GO:0015193 L-proline transmembrane transporter activi  
 mitogen-e MAP kinas GO:00001 GO:00059 GO:00050 (sce04139) Mitophagy - yeast; (sce04011) MAPK  
 Rho famil Non-esser GO:00436 GO:00003 GO:0003924 GTPase activity; GO:0005525 GTP binding; GO:  
 trifuncti NADPH-de GO:00195 GO:00058 GO:0004032 alditol:NADP+ 1-oxidoreductase activity; GO  
 glycine c P subunit GO:00194 GO:00059 GO:00043 (sce00630) Glyoxylate and dicarboxylate metab  
 Mvplp Protein r GO:00066 GO:00057 GO:0032266 phosphatidylinositol-3-phosphate binding; G  
 spermidir Spermidir GO:00082 GO:00056 GO:00047 (sce) Methionine salvage pathway; (M00034) Metl  
 hypotheti Putative protein of unknown function  
 F1FO ATP Epsilon s GO:00159 GO:00057 GO:00469 (sce00190) Oxidative phosphorylation; (sce011  
 Rtt10p WD40 dom GO:00324 GO:00057 GO:0003674 molecular\_function  
 hypotheti Putative GO:00081 GO:00055 GO:0003674 molecular\_function  
 phosphati Phosphoir GO:00709 GO:00321 GO:0005546 phosphatidylinositol-4,5-bisphosphate bind  
 malate de Mitochon GO:00061 GO:00057 GO:00044 (sce00620) Pyruvate metabolism; (sce01200) Carl  
 Jip4p Protein c GO:00081 GO:00055 GO:0003674 molecular\_function  
 ATP-deper ATPase, r GO:00004 GO:00306 GO:0004004 ATP-dependent RNA helicase activity; GO:000  
 hypotheti Putative GO:00081 GO:00059 GO:0003674 molecular\_function  
 calcineu Calcineu GO:00007 GO:00059 GO:00331 (Human) (hsa05014) Amyotrophic lateral scleros  
 flavin ac Flavins ac GO:00158 GO:00059 GO:0015230 FAD transmembrane transporter activity; GO:  
 putative Putative GO:00325 GO:00057 GO:00037 (sce03010) Ribosome  
 None None None None None None  
 xylulokir Xylulokir GO:00059 GO:00057 GO:00048 (sce00040) Pentose and glucuronate interconve  
 hypotheti Protein c GO:00104 GO:00003 GO:0030414 peptidase inhibitor activity; GO:0061134 pe  
 Mic10p Conserved GO:00424 GO:00616 GO:0003674 molecular\_function  
 putative Mitochon GO:00020 GO:00057 GO:0008198 ferrous iron binding; GO:0051537 2 iron, 2  
 pentafunc Pentafunc GO:00094 GO:00057 GO:00038 (M00022) Shikimate pathway, phosphoenolpyruva  
 Taf12p Subunit GO:00439 GO:00466 GO:00044 (sce03022) Basal transcription factors  
 27S pre-r AdoMet-de GO:00004 GO:00306 GO:0008650 rRNA (uridine-2'-O-)-methyltransferase act  
 glutathic Glutared GO:00988 GO:00057 GO:0004362 glutathione-disulfide reductase activity; G  
 proteason Beta 5 s GO:00801 GO:00345 GO:00042 (sce03050) Proteasome  
 None None None None None None  
 Tpolp Polyamine GO:19037 GO:00331 GO:0015606 spermidine transmembrane transporter activ  
 phosphati Polyphos GO:00468 GO:00304 GO:00438 (sce00562) Inositol phosphate metabolism; (sc  
 phosphati Protein i GO:00065 GO:00005 GO:00171 (sce00563) Glycosylphosphatidylinositol (GPI)-  
 Put3p Transcri GO:20011 GO:00056 GO:0000978 RNA polymerase II proximal promoter sequen  
 mitochon Mitochon GO:00000 GO:00057 GO:00701 (sce03010) Ribosome  
 N-acetyl Catalytic GO:00064 GO:00435 GO:00045 (sce) N-glycan precursor biosynthesis; (M0005  
 protein c Protein c GO:19043 GO:00057 GO:00037 (sce04141) Protein processing in endoplasmic  
 hypotheti Putative GO:00081 GO:00055 GO:0003674 molecular\_function  
 adenosyl S-adenosy GO:00195 GO:00058 GO:00040 (sce00270) Cysteine and methionine metabolism  
 ESCRT-II Component GO:00004 GO:00008 GO:00036 (sce04144) Endocytosis  
 aldehyde Cytoplasm GO:00194 GO:00057 GO:00438 (sce00360) Phenylalanine metabolism; (sce0041  
 None None None None None None  
 pheromon Pheromon GO:00322 GO:00433 GO:0003674 molecular\_function  
 sterol ac Acyl-CoA GO:00082 GO:00057 GO:00347 (sce00100) Steroid biosynthesis  
 glucose-i Subunit c GO:00457 GO:00346 GO:0004842 ubiquitin-protein transferase activity; GO:  
 None None None None None None  
 Sog2p Key comp GO:00071 GO:00433 GO:0003674 molecular\_function  
 glucose-i Central c GO:00457 GO:00346 GO:0003674 molecular\_function  
 Reilp Cytoplasm GO:00071 GO:00306 GO:0008270 zinc ion binding; GO:0043565 sequence-speci

serine/threonine Protein cGO:00617(GO:01200(GO:00046(sce04136)Autophagy - other; (sce04139)Mitophagy  
Ecl1p Protein cGO:00081(GO:00055(GO:0003674 molecular\_function  
putative NADPH oxidaseGO:00329(GO:00970(GO:0000293 ferric-chelate reductase activity;GO:00161  
proteinaseVacuolar GO:00070(GO:000032(GO:00042(sce04138)Autophagy - yeast  
mRNA (guanine)MethyltransferaseGO:01060(GO:00058(GO:00044(sce03015)mRNA surveillance pathway  
aconitaseAconitaseGO:00060(GO:00426(GO:00039(M00010)Citrate cycle, first carbon oxidation  
Fmp40p Putative GO:00081(GO:00055(GO:0003674 molecular\_function  
proteaseBETA 1 subunitGO:00104(GO:00345(GO:00042(sce03050)Proteasome  
Sip2p One of theGO:20002(GO:00315(GO:00046(Human) (hsa04710)Circadian rhythm; (hsa04213)Serpin  
seripaupeProtein cGO:00304(GO:000927(GO:0005199 structural constituent of cell wall;GO:000  
mitochondrialMitochondrialGO:00325(GO:00057(GO:0003735 structural constituent of ribosome;GO:0005  
Scp1p ComponentGO:00013(GO:00304(GO:0030674 protein binding, bridging;GO:0051015 actin  
ATP-dependentATP-dependentGO:00511(GO:00057(GO:0004176 ATP-dependent peptidase activity;GO:000425  
GET complexSubunit cGO:00450(GO:00435(GO:0043495 protein membrane anchor;GO:0005515 protein  
trifunctionalAldose reductaseGO:00195(GO:00058(GO:00328(sce00040)Pentose and glucuronate interconve  
proteaseBETA 2 subunitGO:00104(GO:00345(GO:00042(sce03050)Proteasome  
Rml1p Subunit cGO:00070(GO:00314(GO:0000400 four-way junction DNA binding;GO:0000217 DNA  
H(+)-exporterPlasma membraneGO:01200(GO:00057(GO:00085(sce00190)Oxidative phosphorylation  
putative Plasma membraneGO:00714(GO:00058(GO:0004721 phosphoprotein phosphatase activity;GO:001  
Rtc3p Protein cGO:00063(GO:00056(GO:0003674 molecular\_function  
Mrx11p Protein tGO:00081(GO:00057(GO:0003674 molecular\_function  
Yps5p Protein vGO:00315(GO:000927(GO:0004190 aspartic-type endopeptidase activity;GO:00  
3-hydroxy-3-hydroxyGO:00343(GO:00056(GO:00003(sce00380)Tryptophan metabolism; (sce01100)M  
bifunctionalGlycogen GO:00059(GO:00057(GO:00041(sce00500)Starch and sucrose metabolism; (sc  
Pst1p Cell wallGO:00315(GO:000927(GO:0003674 molecular\_function  
seripaupeProtein cGO:00315(GO:000927(GO:0005199 structural constituent of cell wall;GO:000  
Src1p Inner nuclearGO:00430(GO:00056(GO:0003674 molecular\_function  
alpha-1,3-Galactose-4-epimeraseGO:00064(GO:000032(GO:00000(sce00514)Other types of O-glycan biosynthes  
Pex3p PeroxisomeGO:00450(GO:00057(GO:00306(sce04146)Peroxisome  
Mga2p ER membraneGO:00360(GO:00301(GO:0003674 molecular\_function  
Rev7p AccessoryGO:00709(GO:00160(GO:00038(sce01100)Metabolic pathways  
glucosePlasma membraneGO:00515(GO:00058(GO:00053(sce04113)Meiosis - yeast  
myo-inositolMyo-inositolGO:00157(GO:000032(GO:0005366 myo-inositol:proton symporter activity;GO:0  
Ett1p Nuclear pGO:20006(GO:00056(GO:0003674 molecular\_function  
F1F0 ATP Subunit cGO:00336(GO:000027(GO:00469(sce00190)Oxidative phosphorylation; (sce011  
mRNA-bindingRNA-bindingGO:20008(GO:00104(GO:00313(sce03022)Basal transcription factors  
aldose 1-Phosphate Putative GO:00334(GO:00055(GO:0004034 aldose 1-epimerase activity;GO:0016857 rac  
Cssl1p Protein cGO:00071(GO:00055(GO:0003674 molecular\_function  
Spo77p Meiosis-sGO:00321(GO:00057(GO:0003674 molecular\_function  
proteaseSubunit cGO:00431(GO:00345(GO:00036(sce03050)Proteasome  
seripaupeProtein cGO:00315(GO:000927(GO:0005199 structural constituent of cell wall;GO:000  
NADPH-dependentOxidoreductaseGO:00068(GO:00057(GO:0015039 NADPH-adrenodoxin reductase activity;GO:00  
alanineAlanineGO:00192(GO:00057(GO:00047(sce00630)Glyoxylate and dicarboxylate metabo  
Pex21p PeroxisomeGO:00165(GO:00057(GO:0005515 protein binding;GO:0005488 binding;GO:0003  
histidineHistidineGO:00001(GO:00057(GO:00044(sce)Histidine biosynthesis, PRPP => histidin  
Tom5p ComponentGO:00700(GO:00057(GO:0008320 protein transmembrane transporter activity  
isocitrateCytosolicGO:00060(GO:00058(GO:00044(M00010)Citrate cycle, first carbon oxidation  
Rsc6p ComponentGO:00063(GO:00165(GO:0015616 DNA translocase activity;GO:0008094 DNA-de  
Csr2p Nuclear tGO:00700(GO:00058(GO:0031625 ubiquitin protein ligase binding;GO:004438  
hypotheticalPutative GO:00081(GO:00160(GO:0003674 molecular\_function  
hypotheticalPutative protein of unknown function; green fluorescent protein (GFP)-fusion pro  
F1F0 ATP Subunit cGO:00159(GO:000027(GO:00469(sce00190)Oxidative phosphorylation; (sce011  
sphingolipidProtein tGO:19000(GO:00353(GO:0003674 molecular\_function  
chromatinATPase arginineGO:00427(GO:00310(GO:0043140 ATP-dependent 3'-5' DNA helicase activity;

acylglycerol Monoglycerol GO:001945 GO:000574 GO:004737 (sce)Acylglycerol degradation; (M00098)Acylglycerol  
 Elongation Subunit GO:003244 GO:003358 GO:0008017 microtubule binding; GO:0015631 tubulin binding  
 ribosomal Protein GO:000002 GO:002262 GO:000375 (sce03010)Ribosome  
 nicotinate Nicotinate GO:190452 GO:000078 GO:000895 (sce00760)Nicotinate and nicotinamide metabolism  
 sterol 14 Lanosterol GO:000665 GO:000578 GO:000839 (sce00100)Steroid biosynthesis; (sce01130)Biotin  
 proteasome Alpha 5 GO:001045 GO:003451 GO:000429 (sce03050)Proteasome  
 Arf family ADP-ribosyltransferase GO:000685 GO:000579 GO:000392 (sce04144)Endocytosis  
 glucan exo-1,3-glucanase GO:000925 GO:000927 GO:000435 (sce00500)Starch and sucrose metabolism  
 Ski7p GTP-binding GO:007047 GO:000582 GO:000374 (sce03015)mRNA surveillance pathway; (sce03015)mRNA  
 fructose Fructose GO:000595 GO:004259 GO:004215 (M00003)Gluconeogenesis, oxaloacetate => fructose  
 putative Possible GO:000651 GO:003015 GO:0004252 serine-type endopeptidase activity; GO:0008008  
 hypothetical Putative GO:000815 GO:000557 GO:0003674 molecular\_function  
 hypothetical Putative GO:000815 GO:000557 GO:0003674 molecular\_function  
 hypothetical Putative GO:003225 GO:001602 GO:0008757 S-adenosylmethionine-dependent methyltransferase  
 metalloprotein Zinc metalloprotein GO:000651 GO:000578 GO:000422 (Human) (hsa04614)Renin-angiotensin system  
 Uil1p Protein GO:003096 GO:000578 GO:0003674 molecular\_function  
 Pnolp Essential GO:000047 GO:003068 GO:0051082 unfolded protein binding; GO:0003723 RNA binding  
 tRNA threonylcarbamoyladenosine dehydratase (R, R)-butyrate NAD-dependent GO:003407 GO:000578 GO:000072 (sce00650)Butanoate metabolism  
 hypothetical Protein GO:000042 GO:000584 GO:0043022 ribosome binding; GO:0043021 ribonucleoprotein complex  
 She2p RNA-binding GO:000755 GO:000595 GO:1990825 sequence-specific mRNA binding; GO:0003729 RNA binding  
 Dst1p General transcription factor GO:003155 GO:000556 GO:0001139 RNA polymerase II complex recruiting activity  
 translation Translational GO:199014 GO:004361 GO:004302 (sce03013)RNA transport  
 None None None None None None  
 malate dehydrogenase Cytoplasmic GO:001655 GO:003439 GO:003006 (M00012)Glyoxylate cycle; (sce)Glyoxylate cycle  
 alanine tCatalytic GO:004285 GO:000556 GO:000402 (sce00220)Arginine biosynthesis; (sce00250)Alanine  
 AAA family Huge dynein GO:000002 GO:003068 GO:001688 (sce03008)Ribosome biogenesis in eukaryotes  
 hypothetical Protein GO:000815 GO:000578 GO:0003674 molecular\_function  
 phosphatase Mg2+-dependent GO:000627 GO:000581 GO:000815 (sce00561)Glycerolipid metabolism; (sce00564)Phosphatase  
 stress-response Trimeric GO:006144 GO:000578 GO:0000978 RNA polymerase II proximal promoter sequence-specific  
 Ubx7p UBX (ubiquitin) GO:003045 GO:000556 GO:0003674 molecular\_function  
 mitochondrial Highly conserved GO:000685 GO:003133 GO:0050833 pyruvate transmembrane transporter activity  
 Sgt2p Glutamine GO:190364 GO:007238 GO:0032947 protein-containing complex scaffold activity  
 mannosyltransferase Mannosyltransferase GO:000002 GO:000015 GO:0000026 alpha-1,2-mannosyltransferase activity; GO:0000026  
 F1F0 ATP Subunit GO:001595 GO:000027 GO:004695 (sce00190)Oxidative phosphorylation; (sce01100)Oxidative phosphorylation  
 hypothetical Component GO:000815 GO:003212 GO:0003674 molecular\_function  
 hexose transport Putative GO:001575 GO:000032 GO:001557 (sce04113)Meiosis - yeast  
 E2 ubiquitin Ubiquitin GO:007162 GO:000015 GO:007062 (sce04120)Ubiquitin mediated proteolysis; (sce04120)Ubiquitin  
 peroxisomal ER-resident GO:003255 GO:000578 GO:0003674 molecular\_function  
 Utp9p Nucleolar GO:004594 GO:0034455 t-UTP (sce03008)Ribosome biogenesis in eukaryotes  
 hypothetical Putative GO:000815 GO:000557 GO:0003674 molecular\_function  
 endopolyphosphate Dual endopolyphosphate GO:000675 GO:000032 GO:0000298 endopolyphosphatase activity; GO:0004309 exopolyphosphatase  
 fumarate Soluble GO:007145 GO:000584 GO:0016156 fumarate reductase (NADH) activity; GO:0000000  
 homocitrulline Homocitrulline GO:001987 GO:000578 GO:000441 (sce)Lysine biosynthesis, 2-oxoglutarate => homocitrulline  
 Rm1p Subunit GO:000025 GO:000017 GO:004215 (sce03008)Ribosome biogenesis in eukaryotes  
 pheromone Pheromone GO:000815 GO:000578 GO:0003674 molecular\_function  
 Msi1p Subunit GO:000635 GO:003318 GO:0042393 histone binding; GO:0005515 protein binding  
 hypothetical Putative protein of unknown function; identified by gene-trapping, microarray-based  
 E2 ubiquitin Ubiquitin GO:003045 GO:000582 GO:007062 (sce04120)Ubiquitin mediated proteolysis  
 putative Putative GO:003047 GO:000556 GO:0004553 hydrolase activity, hydrolyzing O-glycosylated  
 Avl9p Conserved GO:000685 GO:000595 GO:0003674 molecular\_function  
 tRNA 1-methyl Subunit GO:003045 GO:003151 GO:0016429 tRNA (adenine-N1-)-methyltransferase activity  
 hypothetical Nuclear GO:000815 GO:000582 GO:0003674 molecular\_function  
 Mad3p Subunit GO:000705 GO:000077 GO:000467 (sce04111)Cell cycle - yeast

Aim9p Protein cGO:00081fGO:00057fGO:0003674 molecular\_function  
 Ecm2p Pre-mRNA GO:00003fGO:00710(GO:00170f(sce03040)Spliceosome  
 cytochromeSubunit \GO:00061fGO:00057fGO:00041f(sce00190)Oxidative phosphorylation; (sce0110  
 Erv15p Protein iGO:00071fGO:00301fGO:0003674 molecular\_function  
 Acalp ATF/CREB GO:00459fGO:00056fGO:0001228 DNA-binding transcription activator activi  
 DNA-bindZinc clusGO:00614fGO:00056fGO:0001228 DNA-binding transcription activator activi  
 isoleucirMitochondGO:00090fGO:00057fGO:0019239 deaminase activity;GO:0016787 hydrolase ac  
 Hfmlp Meiosis sGO:19901fGO:00056fGO:0000404 heteroduplex DNA loop binding;GO:0032406 M  
 putative Serine/thGO:20002fGO:00104fGO:0004712 protein serine/threonine/tyrosine kinase a  
 E2 ubiquiUbiquitinGO:01201fGO:19903(GO:00431f(sce04120)Ubiquitin mediated proteolysis  
 D-arabincNADP+ deGO:00442fGO:00058fGO:0045290 D-arabinose 1-dehydrogenase [NAD(P)+] acti  
 bifunctiDiacylglyGO:00066fGO:00003fGO:00008f(sce00561)Glycerolipid metabolism; (sce00564  
 Mholp Protein cGO:00081fGO:00056fGO:0003674 molecular\_function  
 Nrplp Putative GO:00081fGO:00104fGO:0003723 RNA binding;GO:0046872 metal ion binding;G  
 tetrafuncBeta subGO:00427fGO:00058fGO:00043f(sce)Fatty acid biosynthesis, elongation; (M  
 polyaminePolyamineGO:00063fGO:00057fGO:0004059 aralkylamine N-acetyltransferase activity;  
 Ylf2p Protein cGO:00081fGO:00057fGO:0005525 GTP binding;GO:0032550 purine ribonucleosi  
 Vac7p Integral GO:00105fGO:00707fGO:0003674 molecular\_function  
 hydroxymeHMG-CoA rGO:00066fGO:00057fGO:00044f(sce)C5 isoprenoid biosynthesis, mevalonate  
 hypothetiPutative GO:00091fGO:00003fGO:0016787 hydrolase activity;GO:0003824 catalytic ac  
 Sip5p Protein cGO:00421fGO:00057fGO:0003674 molecular\_function  
 Kre9p GlycoprotGO:00060fGO:00003fGO:0003674 molecular\_function  
 hypothetiProtein cGO:00081fGO:00056fGO:0003674 molecular\_function  
 Hsp70 fanATPase irGO:00066fGO:00092fGO:00441f(sce04213)Longevity regulating pathway - mul  
 mitogen-eMitogen-eGO:00109fGO:00425fGO:00047f(sce04933)AGE-RAGE signaling pathway in diab  
 RNA exporRNA exporGO:20007fGO:00056fGO:00431f(sce03013)RNA transport  
 sphinganiMinor splGO:00468fGO:00001fGO:00084f(sce)Sphingosine degradation; (M00100)Sphingo  
 Zrg8p Protein cGO:00315fGO:00059fGO:0003674 molecular\_function  
 thioredoMitochondGO:00194fGO:00057fGO:00047f(sce00450)Selenocompound metabolism; (sce002  
 putative Protein cGO:00092fGO:19036(GO:00363f(sce00750)Vitamin B6 metabolism  
 Gat2p Protein cGO:00063fGO:00056fGO:0000981 DNA-binding transcription factor activity,  
 hypothetiConserveGO:00081fGO:00056fGO:0003674 molecular\_function  
 She3p Protein eGO:00075fGO:00059fGO:1990825 sequence-specific mRNA binding;GO:0003729  
 hypothetiPutative GO:00081fGO:00057fGO:0003674 molecular\_function  
 MIND comEssentialGO:00070fGO:00008fGO:0003674 molecular\_function  
 Stb2p Protein tGO:00081fGO:00708fGO:0003674 molecular\_function  
 membrane Protein rGO:00329fGO:00313(GO:0032977 membrane insertase activity;GO:0008565 pro  
 E3 ubiquiE3 ubiquiGO:00450(GO:00057fGO:0004386 helicase activity;GO:0004842 ubiquitin-pro  
 hexose tHexose tGO:19023fGO:00058fGO:00053f(sce04113)Meiosis - yeast  
 U4/U6-U5 ComponentGO:00003fGO:00465fGO:00468f(sce03040)Spliceosome  
 SUMO ligHighly ccGO:19906fGO:00309fGO:0030291 protein serine/threonine kinase inhibitor  
 hypothetiProtein cGO:00081fGO:00056fGO:0003674 molecular\_function  
 Tda4p Putative GO:00081fGO:00057fGO:0003674 molecular\_function  
 acetyl-C3-ketoacyGO:00101fGO:00057fGO:00039f(sce00592)alpha-Linolenic acid metabolism; (G  
 hydroxyacCytoplasmGO:00192fGO:00057fGO:00044f(sce00620)Pyruvate metabolism  
 glycerol-ConstitutGO:00061fGO:00056fGO:00001f(sce00561)Glycerolipid metabolism; (sce01100  
 hypothetiPutative GO:00081fGO:00057fGO:0003674 molecular\_function  
 Tos8p HomeodomGO:00063fGO:00007fGO:0003682 chromatin binding;GO:0043565 sequence-spec  
 protein fCytoplasmGO:00081fGO:00057fGO:0016787 hydrolase activity;GO:0003824 catalytic ac  
 Rplp TranscriGO:00092fGO:00056fGO:0030695 GTPase regulator activity;GO:0060589 nucle  
 RNA-bindNuclear rGO:19022fGO:00003fGO:19901f(sce03015)mRNA surveillance pathway; (sce030  
 Imhlp Protein iGO:00430(GO:00001fGO:0003674 molecular\_function  
 ribosomalRibosomalGO:00000fGO:00226fGO:00198f(sce03010)Ribosome  
 tyrosyl-ITyrosyl-IGO:00000fGO:00057fGO:0070260 5'-tyrosyl-DNA phosphodiesterase activity;

Fe(2+) trIron trarGO:00482GO:00057GO:0005381 iron ion transmembrane transporter activity  
 hypothetiProtein cGO:00081GO:00055GO:0003674 molecular\_function  
 type 2C rType 2C sGO:00064GO:00056GO:0004722 protein serine/threonine phosphatase activ  
 Prp21p Subunit cGO:00003GO:00056GO:0003723 RNA binding;GO:0003676 nucleic acid bindin  
 Hnmlp Plasma meGO:19022GO:00057GO:1901235 (R)-carnitine transmembrane transporter ac  
 coproporCoproporGO:00193GO:00058GO:00041(sce00860)Porphyrin and chlorophyll metaboli  
 Mrx3p Protein tGO:00081GO:00057GO:0003674 molecular\_function  
 Kshlp EssentialGO:00093(GO:00001GO:0003674 molecular\_function  
 ubiquitinComponentGO:00065GO:00001GO:0034450 ubiquitin-ubiquitin ligase activity;GO:006  
 membrane MitochonGO:00329GO:00970(GO:00971(sce03060)Protein export  
 Pdp3p ComponentGO:00329GO:19904GO:0003682 chromatin binding;GO:0005488 binding;GO:00  
 proteasomEssentialGO:00431GO:00345GO:00055(sce03050)Proteasome  
 TOR complProtein rGO:00319GO:00319GO:00302(sce04136)Autophagy - other; (sce04138)Autopl  
 putative Protein iGO:00325GO:00057GO:00037(sce03010)Ribosome  
 Fpslp AquaglyceGO:00068GO:00003GO:0015254 glycerol channel activity;GO:0015168 glyce  
 Fmp42p Putative GO:00550GO:00003GO:0003674 molecular\_function  
 putative Putative GO:00550GO:00719GO:0022857 transmembrane transporter activity;GO:0005  
 hypothetiProtein cGO:00081GO:00055GO:0003674 molecular\_function  
 lysophosLysophosGO:00353GO:00058GO:0003841 1-acylglycerol-3-phosphate O-acyltransfera  
 Lsolp Protein vGO:00550GO:00056GO:0003674 molecular\_function  
 leucine cCarboxyl GO:00064GO:00055GO:0018423 protein C-terminal leucine carboxyl O-meth  
 hypothetiProtein cGO:00070GO:00057GO:0003674 molecular\_function  
 peptidylPeptidylGO:00004GO:00007GO:0005527 macrolide binding;GO:0003755 peptidyl-prol  
 malate dMitochonGO:00013(GO:00057GO:00300(M00012)Glyoxylate cycle; (sce)Glyoxylate cy  
 bifunctiFarnesyl GO:00333GO:00057GO:00041(sce00900)Terpenoid backbone biosynthesis; (s  
 transglycChitin trGO:00060GO:00001GO:0004553 hydrolase activity, hydrolyzing O-glycosyl  
 1,4-alphaGlycogen GO:00059GO:00057GO:01027(sce00500)Starch and sucrose metabolism; (sc  
 lanosterLanosterGO:00066GO:00058GO:00002(sce00100)Steroid biosynthesis; (sce01130)Bi  
 Tda6p Putative GO:00150GO:00003GO:0003674 molecular\_function  
 putative Putative GO:00000GO:00306GO:00055(sce03008)Ribosome biogenesis in eukaryotes  
 bifunctiBifunctiGO:00459GO:00057GO:00040(sce)Uridine monophosphate biosynthesis, glu  
 mitochondMitochonGO:00325GO:00057GO:0003735 structural constituent of ribosome;GO:0005  
 bifunctiIndole-3-GO:00001GO:00057GO:00044(sce)Tryptophan biosynthesis, chorismate =>  
 serine/tProtein lGO:00714GO:00056GO:0004693 cyclin-dependent protein serine/threonine  
 putative Putative GO:00163GO:00056GO:0033883 pyridoxal phosphatase activity;GO:0016791  
 methyleneMajor iscGO:00090GO:00057GO:00044(sce00670)One carbon pool by folate; (sce0120  
 alpha-tuAlpha-tuGO:00988GO:00058GO:0005200 structural constituent of cytoskeleton;GO:  
 transcripTranscripGO:00004GO:00056GO:0001227 DNA-binding transcription repressor activi  
 ribosomalRibosomalGO:00021GO:00226GO:00037(sce03010)Ribosome  
 DNA-direcRNA polynGO:00427GO:00057GO:00010(sce03020)RNA polymerase; (sce00240)Pyrimidin  
 Zeolp PeripherGO:00315(GO:00057GO:0003674 molecular\_function  
 GTPase-acGTPase-acGO:00007GO:00058GO:00050(sce04011)MAPK signaling pathway - yeast  
 polyubiquSubstrateGO:00716GO:00008GO:00315(sce04141)Protein processing in endoplasmic  
 hypothetiPutative protein of unknown function; the authentic, non-tagged protein is detec  
 fructose-Fructose GO:00060GO:00092GO:00043(M00003)Gluconeogenesis, oxaloacetate => fru  
 Mnd2p Subunit cGO:19024GO:00056GO:19909(sce04113)Meiosis - yeast  
 valine--tMitochonGO:00064GO:00057GO:00048(sce00970)Aminoacyl-tRNA biosynthesis  
 steryl dSterol dGO:00342GO:00058GO:0034084 steryl deacetylase activity;GO:0019213 dea  
 Gep7p Protein cGO:00081GO:00319GO:0003674 molecular\_function  
 S-methylnHigh-affiGO:00158(GO:00057GO:0000100 S-methylmethionine transmembrane transport  
 hexose trPutative GO:00157GO:00058GO:00155(sce04113)Meiosis - yeast  
 Amnlp Protein rGO:20010GO:00190(GO:0031267 small GTPase binding;GO:0004842 ubiquitin-  
 mitochondMitochonGO:00325GO:00057GO:00037(sce03010)Ribosome  
 Aim45p Putative GO:00335GO:00057GO:0050660 flavin adenine dinucleotide binding;GO:000



putative Protein iGO:000674GO:000574GO:000868 (M00128) Ubiquinone biosynthesis, eukaryotes,  
 glutamyl-Subunit cGO:007068GO:003098GO:005058 (sce00970) Aminoacyl-tRNA biosynthesis; (sce0  
 Dsk2p Nuclear-cGO:003047GO:000582GO:003158 (sce04141) Protein processing in endoplasmic  
 phosphoglyPhosphoglyGO:000598GO:000582GO:000461 (M00549) Nucleotide sugar biosynthesis, gluco  
 Oxrlp Protein cGO:003458GO:000578GO:0003674 molecular\_function  
 inorganicMitochondrionGO:000908GO:000578GO:000442 (sce00190) Oxidative phosphorylation  
 Rho familyGuanine rGO:0090630 activateGO:000508 (sce04011) MAPK signaling pathway - yeast  
 calcineurinCalcineurinGO:000078GO:000598GO:003318 (Human) (hsa05014) Amyotrophic lateral sclerosis  
 Cgrlp Protein iGO:000638GO:003068GO:0003674 molecular\_function  
 TRAPP subunitCore complexGO:000688GO:199007GO:0017112 Rab guanyl-nucleotide exchange factor acti  
 histone HHistone IGO:000638GO:003128GO:004698 (Human) (hsa05322) Systemic lupus erythematosus  
 Tom6p ComponentGO:007008GO:000574GO:0008320 protein transmembrane transporter activity  
 Sas2p Histone eGO:004398GO:003328GO:0046972 histone acetyltransferase activity (H4-K16  
 hypothetizedPutative GO:000818GO:000557GO:0003674 molecular\_function  
 Sap30p ComponentGO:200021GO:003368GO:0004407 histone deacetylase activity;GO:0033558 pr  
 hypothetizedPutative GO:000818GO:000557GO:0003674 molecular\_function  
 Cmr3p Putative GO:000818GO:000557GO:0043565 sequence-specific DNA binding;GO:0003677 D  
 chromatinTranscriptionGO:007528GO:000568GO:0003713 transcription coactivator activity;GO:0003  
 Ddr2p Multi-strGO:007038GO:000032GO:0003674 molecular\_function  
 DNA-directedRNA polymerGO:004278GO:000578GO:000108 (sce03020) RNA polymerase; (sce00240) Pyrimidin  
 GTP cycleGTP cycleGO:000928GO:000568GO:000398 (sce00740) Riboflavin metabolism; (sce01110) B  
 aspartyl Aspartic GO:003158GO:000927GO:0004190 aspartic-type endopeptidase activity;GO:00  
 Ups3p MitochondrionGO:007058GO:003131GO:1990050 phosphatidic acid transporter activity;GO:0  
 Vhclp Vacuolar GO:199057GO:003118GO:0015379 potassium:chloride symporter activity;GO:0  
 protein kinaseSerine/threonineGO:001588GO:000588GO:0004674 protein serine/threonine kinase activity;GO  
 Pex5p PeroxisomeGO:001658GO:199042GO:000508 (sce04146) Peroxisome  
 hypothetizedPutative GO:000818GO:001602GO:0004386 helicase activity;GO:0017111 nucleoside-tr  
 SCF ubiquitinRING-H2 cGO:003118GO:003538GO:001978 (sce03420) Nucleotide excision repair; (sce04  
 S-adenosylS-adenosylGO:004598GO:000578GO:0016279 protein-lysine N-methyltransferase activit  
 Ynglp Subunit cGO:003298GO:199046GO:0004402 histone acetyltransferase activity;GO:0061  
 type II rType II rGO:004598GO:000568GO:0016657 oxidoreductase activity, acting on NAD(P)H  
 hypothetizedPutative GO:000818GO:000588GO:0003674 molecular\_function  
 Sft2p Tetra-spGO:004218GO:000018GO:0003674 molecular\_function  
 Spl2p Protein vGO:000668GO:000578GO:0004860 protein kinase inhibitor activity;GO:00192  
 membrane Protein iGO:003218GO:199081GO:0003674 molecular\_function  
 putative Putative GO:003008GO:000568GO:0004674 protein serine/threonine kinase activity;GO  
 acid phosphateOne of tGO:001631GO:000927GO:000398 (sce00740) Riboflavin metabolism; (sce00730) T  
 ubiquitinActivatorGO:190578GO:003358GO:199078 (sce04120) Ubiquitin mediated proteolysis; (s  
 U2-type cProtein iGO:000038GO:000568GO:0003674 molecular\_function  
 hypothetizedPutative GO:000818GO:000578GO:0003674 molecular\_function  
 glutathioneGlutathioneGO:000678GO:000588GO:000438 (sce00480) Glutathione metabolism; (sce00270)  
 Cos3p EndosomalGO:004338GO:000032GO:0003674 molecular\_function  
 RNA polymerHighly cGO:006158GO:000578GO:0000994 RNA polymerase III core binding;GO:0001030  
 N-acetylProtein vGO:007028GO:003138GO:0102200 N-acetylphosphatidylethanolamine-hydrolysi  
 Y' elementHelicase GO:000078GO:000568GO:0003678 DNA helicase activity;GO:0004386 helicase  
 putative MonoacylgGO:005178GO:000557GO:0034338 short-chain carboxylesterase activity;GO:0  
 Lcllp Putative GO:000818GO:003128GO:0003674 molecular\_function  
 Ircl8p Protein iGO:003047GO:000032GO:0003674 molecular\_function  
 inositol Inositol GO:000602GO:000588GO:0000830 inositol hexakisphosphate 4-kinase activit  
 DNA polymerSubunit cGO:007088GO:000868GO:000831 (sce03410) Base excision repair; (sce03030) DN  
 glutamateGamma glyGO:000678 (Human) GGO:000438 (sce00480) Glutathione metabolism; (sce00270)  
 GDP-mannoseGolgi GDFGO:199057GO:003068GO:0005458 GDP-mannose transmembrane transporter acti  
 Arc40p Subunit cGO:003431GO:003047GO:004318 (sce04144) Endocytosis  
 Nem1-Spo7Putative GO:190378GO:007158GO:0004721 phosphoprotein phosphatase activity;GO:001

Crp1p Protein tGO:00081fGO:00056fGO:0003677 DNA binding;GO:0003676 nucleic acid binding  
cleavage Integral GO:00987fGO:00058fGO:00037f(sce03015)mRNA surveillance pathway

Thi2p TranscripGO:00901fGO:00056fGO:0000978 RNA polymerase II proximal promoter sequen  
non-speciProtein lGO:00064fGO:00364fGO:0004674 protein serine/threonine kinase activity;GO  
glutathioProton:glGO:00347fGO:00057fGO:0015343 siderophore transmembrane transporter acti  
acetylornAcetylornGO:00065fGO:00057fGO:00039f(M00028)Ornithine biosynthesis, glutamate =>  
Ran GTPasGTP bindiGO:00066(GO:00160fGO:00039f(sce03008)Ribosome biogenesis in eukaryotes;  
E2 ubiquiE2 ubiquiGO:00109fGO:00313fGO:00616f(sce04120)Ubiquitin mediated proteolysis  
E2-like cConserveGO:00448(GO:00340fGO:00197f(sce04138)Autophagy - yeast

Shr3p EndoplasmGO:00068fGO:00433fGO:0051082 unfolded protein binding;GO:0005515 protei  
Clc1p Clathrin GO:00482fGO:00301fGO:0032050 clathrin heavy chain binding;GO:0030276 cl  
Hrp1p Subunit cGO:00724fGO:00104fGO:00037f(sce03015)mRNA surveillance pathway  
pyridoxanPyridoxirGO:00094fGO:00057fGO:00047f(sce00750)Vitamin B6 metabolism; (sce01100)M  
Rts3p Putative GO:00081fGO:00056fGO:0003674 molecular\_function

histone-lDefining GO:00458fGO:00349fGO:0035064 methylated histone binding;GO:0140034 meth  
ribosomalRibosomalGO:00021fGO:00306fGO:00037f(sce03010)Ribosome

Med2p Subunit cGO:00511fGO:00708fGO:0001135 RNA polymerase II transcription regulator  
Svp26p Integral GO:00450fGO:00301fGO:0097020 COPII adaptor activity;GO:0030674 protein  
hypothetiHaploid-sGO:00081fGO:00055fGO:0003674 molecular\_function

Hsp70 fanMolecularGO:00312(GO:00058fGO:00007f(sce04141)Protein processing in endoplasmic  
DNA ligasDNA ligasGO:00511(GO:00328(GO:00039f(sce03450)Non-homologous end-joining  
CDP-diacyPhosphatiGO:00066fGO:00057fGO:00038f(M00093)Phosphatidylethanolamine (PE) biosyn  
Pzf1p TranscripGO:00427fGO:00056fGO:0001002 RNA polymerase III type 1 promoter sequenc  
Hgh1p NonessentGO:00081fGO:00056fGO:0003674 molecular\_function

None None None None None None

Arf familARF familGO:00034(GO:00301fGO:00039f(sce04141)Protein processing in endoplasmic  
Irs4p EH domairGO:00001fGO:00004(GO:0003674 molecular\_function

Sps4p Protein vGO:00304fGO:00058fGO:00036f(sce04113)Meiosis - yeast  
bifunctioBifunctioGO:00094fGO:00058fGO:00041f(M00022)Shikimate pathway, phosphoenolpyruva  
ATP syntlAssembly GO:00336fGO:00057fGO:0019904 protein domain specific binding;GO:0005515  
Pbi2p CytosolicGO:00421fGO:00058fGO:0004867 serine-type endopeptidase inhibitor activi  
carnitineCarnitineGO:00094fGO:19904fGO:00040f(sce04146)Peroxisome

iron-bincConserveGO:00020fGO:00057fGO:0008198 ferrous iron binding;GO:0051537 2 iron, 2  
Stb3p RibosomalGO:00004fGO:00056fGO:0001228 DNA-binding transcription activator activi  
Ump1p ChaperonGO:00432fGO:00056fGO:00036f(sce03050)Proteasome  
hypothetiPutative GO:00004fGO:00055fGO:0003674 molecular\_function  
hypothetiPutative GO:00081fGO:00055fGO:0003674 molecular\_function  
putative Putative GO:00065(GO:00057fGO:0008237 metalloproteinase activity;GO:0070011 pepti  
ribosomalRibosomalGO:00422fGO:00226fGO:00037f(sce03010)Ribosome

Mtc2p Protein cGO:00081fGO:00055fGO:0003674 molecular\_function  
hypothetiPutative GO:00081fGO:00003fGO:0003674 molecular\_function

Snm1p RibonuclGO:00305fGO:00056fGO:00421f(sce03008)Ribosome biogenesis in eukaryotes  
homocitrHomocitrGO:00198fGO:00057fGO:00044f(sce)Lysine biosynthesis, 2-oxoglutarate =>  
8-oxoguarNuclear fGO:00709fGO:00315fGO:00340f(sce03410)Base excision repair  
ribonuclVacuolar GO:00905(GO:00057fGO:0033897 ribonuclease T2 activity;GO:0016892 endori  
Rab gerarAlpha suGO:00183fGO:00059fGO:0004663 Rab geranylgeranyltransferase activity;GO:  
tRNA (guaCatalyticGO:00304fGO:00435fGO:0004809 tRNA (guanine-N2-)-methyltransferase activ  
mitochondMitochondGO:00325fGO:00057fGO:0003735 structural constituent of ribosome;GO:0005  
Mup3p Low affirGO:19036fGO:00003fGO:0015191 L-methionine transmembrane transporter act  
hypothetiPutative GO:00081fGO:00055fGO:0003674 molecular\_function

SUN familMitochondGO:00013(GO:00313fGO:0016798 hydrolase activity, acting on glycosyl bon  
Nab6p Putative GO:00081fGO:00104fGO:0003729 mRNA binding;GO:0003723 RNA binding;GO:000  
hypothetiPutative GO:00081fGO:00055fGO:0043565 sequence-specific DNA binding;GO:0003677 D  
transcripBasic leiGO:00106fGO:00056fGO:0000981 DNA-binding transcription factor activity,

Azflp Zinc-finger GO:006025 GO:000582 GO:0000978 RNA polymerase II proximal promoter sequence  
 mitogen-activated Stress-activated GO:001096 GO:000562 GO:003355 (sce04011) MAPK signaling pathway - yeast  
 ribosomal Ribosomal GO:000047 GO:003068 GO:000375 (sce03010) Ribosome  
 adenosyl-S-adenosyl GO:000655 GO:000582 GO:000401 (sce) Methionine salvage pathway; (M00034) Met  
 rRNA-binding Constituent GO:000091 GO:003068 GO:0019843 rRNA binding; GO:0003723 RNA binding; GO:000  
 metalloer Metalloer GO:003565 GO:000574 GO:0004222 metalloendopeptidase activity; GO:0008237 m  
 Tom7p Component GO:004504 GO:000574 GO:0008320 protein transmembrane transporter activity  
 putative ATP-binding GO:001631 GO:000562 GO:000888 (sce00561) Glycerolipid metabolism; (sce00630)  
 tryptophan Tryptophan GO:000016 GO:000562 GO:000485 (sce) Tryptophan biosynthesis, chorismate =>  
 Ccw14p Covalent GO:003151 GO:0009277 fungal-type cell wall; GO:0005618 cell wall; GO:00312  
 Rnh202p Ribonucleic GO:004315 GO:003229 GO:0004523 RNA-DNA hybrid ribonuclease activity; GO:00  
 ATP-binding ABC type GO:001572 GO:000032 GO:0015127 bilirubin transmembrane transporter activi  
 AAA family ATPase of GO:004227 GO:003068 GO:001688 (sce03008) Ribosome biogenesis in eukaryotes  
 Ccm1p Mitochondrion GO:000096 GO:000575 GO:0019843 rRNA binding; GO:0003723 RNA binding; GO:000  
 mitogen-activated Mitogen-activated GO:006135 GO:000562 GO:000470 (sce04933) AGE-RAGE signaling pathway in diab  
 hypothetic Protein GO:000815 GO:000595 GO:0003674 molecular\_function  
 Nbalp Protein GO:000815 GO:000595 GO:0043022 ribosome binding; GO:0043021 ribonucleoprote  
 arginine/Arginine GO:000597 GO:000562 GO:0070006 metalloaminopeptidase activity; GO:0004177  
 peptide-methionine Methionine GO:003455 GO:000562 GO:0036456 L-methionine-(S)-S-oxide reductase activit  
 None None None None None None  
 transcriber Transcriber GO:006115 GO:000562 GO:0003714 transcription corepressor activity; GO:0003  
 hypothetic Putative GO:000815 GO:000557 GO:0003674 molecular\_function  
 Rtg3p bHLH/Zip GO:007114 GO:000562 GO:0001085 RNA polymerase II transcription factor bind  
 Gep3p Protein GO:003045 GO:000574 GO:0005525 GTP binding; GO:0032550 purine ribonucleosid  
 Ccc1p Vacuolar GO:000688 GO:000032 GO:0015093 ferrous iron transmembrane transporter act  
 Blm10p Proteasome GO:199025 GO:003451 GO:007057 (sce03050) Proteasome  
 electron Component GO:190125 GO:000575 GO:0051537 2 iron, 2 sulfur cluster binding; GO:005153  
 Vhr2p Non-essential GO:000635 GO:000562 GO:0003677 DNA binding; GO:0003676 nucleic acid bindin  
 hypothetic Protein GO:000815 GO:000575 GO:0003676 nucleic acid binding; GO:1901363 heterocycl  
 protein-like Protein-like GO:001096 GO:000557 GO:0004694 eukaryotic translation initiation factor 2  
 Apl1p Beta-actin GO:000688 GO:003012 GO:0030276 clathrin binding; GO:0005515 protein bindin  
 kinetochore Component GO:000705 GO:0031262 Ndc80 complex; GO:0000778 condensed nuclear chromoso  
 high-mobility High-mobility GO:000115 GO:000075 GO:0008301 DNA binding, bending; GO:0031491 nucleosome  
 Utp4p Subunit GO:004594 GO:003445 GO:000367 (sce03008) Ribosome biogenesis in eukaryotes  
 ubiquitin Ubiquitin GO:001657 GO:000575 GO:0004843 thiol-dependent ubiquitin-specific proteas  
 hypothetic Putative protein of unknown function; the authentic, non-tagged protein is detec  
 hypothetic Putative GO:000815 GO:000575 GO:0003674 molecular\_function  
 Rab GTPase Rab GTPase GO:007064 GO:000015 GO:0017137 Rab GTPase binding; GO:0005096 GTPase activ  
 MutS family Protein GO:005102 GO:003223 GO:0032143 single thymine insertion binding; GO:003213  
 mitochondrion Mitochondrion GO:000046 GO:000575 GO:000375 (sce03010) Ribosome  
 mRNA (N6-mRNA N6-adenosine GO:200022 GO:003635 GO:0001734 mRNA (N6-adenosine)-methyltransferase acti  
 adenosine Adenosine GO:004422 GO:000582 GO:000400 (sce00230) Purine metabolism; (sce01100) Metab  
 Mpm1p Mitochondrion GO:000815 GO:000575 GO:0003674 molecular\_function  
 putative Protein-like GO:005172 GO:000562 GO:000465 (sce04011) MAPK signaling pathway - yeast  
 Uip4p Protein GO:000815 GO:000574 GO:0003674 molecular\_function  
 Spo19p Meiosis GO:007058 GO:000562 GO:0003674 molecular\_function  
 None None None None None None  
 hypothetic Protein-like GO:001505 GO:000584 GO:0043022 ribosome binding; GO:0043021 ribonucleoprote  
 SUMO protease Peptidase GO:000705 GO:000562 GO:0070140 SUMO-specific isopeptidase activity; GO:007  
 Bem4p Protein-like GO:001925 GO:000582 GO:0005096 GTPase activator activity; GO:0030695 GTPase  
 TFIIH/NEF Subunit GO:004575 GO:007098 GO:006157 (sce03022) Basal transcription factors; (sce0  
 tropomyosin Major isoform GO:000711 GO:000014 GO:0003786 actin lateral binding; GO:0051015 actin fil  
 polyphosphoryl Polyphosphoryl GO:190191 GO:000562 GO:1990174 phosphodiesterase decapping endonuclease a  
 putative Ubiquitin GO:001096 GO:000575 GO:190485 (sce04120) Ubiquitin mediated proteolysis

Tsr2p Protein vGO:00004fGO:00056fGO:0003674 molecular\_function  
hypothetiPutative protein of unknown function; identified by homology; green fluorescent  
mRNA spliRNA splicGO:00003fGO:00710fGO:00306f(sce03040)Spliceosome  
Cbp6p MitochondGO:00345fGO:00616fGO:0043022 ribosome binding;GO:0043021 ribonucleoprot  
SAGA compSubunit cGO:00165fGO:00001fGO:0017025 TBP-class protein binding;GO:0003712 trans  
Slx9p Protein rGO:00000fGO:00306fGO:0003674 molecular\_function  
[Histone JmjC domGO:00705fGO:00056fGO:0051864 histone demethylase activity (H3-K36 speci  
Sol2p Protein vGO:00090fGO:00058fGO:00170f(M00006)Pentose phosphate pathway, oxidative  
Rcn2p Protein cGO:00081fGO:00057fGO:0003674 molecular\_function  
septin SComponentGO:00321fGO:00001fGO:0032947 protein-containing complex scaffold activi  
nucleoporNucleoporGO:00353fGO:00446fGO:0008536 Ran GTPase binding;GO:0017056 structural c  
fructose-Fructose-GO:00060(GO:00058fGO:00043f(sce00051)Fructose and mannose metabolism  
Mlc2p RegulatorGO:00009fGO:00001fGO:0032038 myosin II heavy chain binding;GO:0045159 m  
Clflp Member ofGO:00003fGO:00710(GO:00003f(sce03040)Spliceosome  
putative UbiquitinGO:00311fGO:00056fGO:00616f(sce04120)Ubiquitin mediated proteolysis  
long-chainAcyl-CoA-GO:00427fGO:00055fGO:00360f(Human)(hsa03320)PPAR signaling pathway  
Prp40p U1 snRNP GO:00452fGO:00056fGO:00037f(sce03040)Spliceosome  
Atg20p Sorting rGO:00344fGO:00340fGO:0032266 phosphatidylinositol-3-phosphate binding;G  
oligopeptProton-cGO:00356fGO:00058fGO:0005427 proton-dependent oligopeptide secondary ac  
phosphopSubunit cGO:00159fGO:00715fGO:00046f(sce)Coenzyme A biosynthesis, pantothenate =  
hydroxymePorphobilGO:00181fGO:00056fGO:00044f(sce00860)Porphyrin and chlorophyll metaboli  
seripaupMember ofGO:00315(GO:00092fGO:0005199 structural constituent of cell wall;GO:000  
Tdallp Putative GO:00081fGO:00057fGO:0003674 molecular\_function  
anaphase Subunit cGO:00311fGO:00056fGO:00616f(sce04120)Ubiquitin mediated proteolysis; (s  
Rud3p Golgi matGO:00068fGO:00057fGO:0051020 GTPase binding;GO:0019899 enzyme binding;G  
ubiquitinDeubiquitGO:19041fGO:00058fGO:19042f(sce04141)Protein processing in endoplasmic  
Bls1p Subunit cGO:00070fGO:00310fGO:0003674 molecular\_function  
IMP dehydInosine nGO:00061fGO:00058fGO:00039f(sce)Guanine ribonucleotide biosynthesis IMP  
Tah1lp DNA repliGO:00062fGO:00056fGO:00036f(sce04111)Cell cycle - yeast; (sce04113)Meio  
tubulin-kPart of tGO:00070fGO:00162fGO:0015631 tubulin binding;GO:0008092 cytoskeletal pr  
pseudouritRNA:pseiGO:00311fGO:00056fGO:0106029 tRNA pseudouridine synthase activity;GO:00  
hypothetiPutative GO:00081fGO:00057fGO:0003674 molecular\_function  
Yct1p High-affiGO:19037fGO:00057fGO:0033229 cysteine transmembrane transporter activit  
DNA damagDNA damagGO:00062fGO:00058fGO:0003924 GTPase activity;GO:0016887 ATPase activity  
flavin-liFlavin-liGO:00450fGO:00057fGO:0016971 flavin-linked sulfhydryl oxidase activity;  
CTP synthMinor CTfGO:00442fGO:00972fGO:00038f(sce)Pyrimidine ribonucleotide biosynthesis,  
cleavage Subunit cGO:00987fGO:0005847 mRNA c.(sce03015)mRNA surveillance pathway  
phosphatiProtein tGO:00433fGO:00058(GO:0070273 phosphatidylinositol-4-phosphate binding;G  
mitochondMitochondGO:00325fGO:00057fGO:0003735 structural constituent of ribosome;GO:0005  
Ioc2p Subunit cGO:00063fGO:00364fGO:0031491 nucleosome binding;GO:0016887 ATPase activ  
Lam6p Sterol trGO:00323fGO:19908fGO:0015248 sterol transporter activity;GO:0005319 lip  
Spg4p Protein rGO:00081fGO:00055fGO:0003674 molecular\_function  
Met32p Zinc-finGO:00313fGO:00056fGO:0001102 RNA polymerase II activating transcription  
Isflp Serine-riGO:00090fGO:00055fGO:0003674 molecular\_function  
Mtclp Protein cGO:00081fGO:00301fGO:0043022 ribosome binding;GO:0043021 ribonucleoprot  
5'-(N(7)-m(7)GpppGO:00002fGO:00009fGO:0050072 m7G(5')pppN diphosphatase activity;GO:0000  
Pib2p Protein cGO:00081fGO:00057fGO:0046872 metal ion binding;GO:0043169 cation bindin  
Pamlp EssentialGO:00071fGO:00059fGO:0003674 molecular\_function  
hypothetiPutative GO:00081fGO:00055fGO:0003674 molecular\_function  
mitochondMitochondGO:00325fGO:00057fGO:0003735 structural constituent of ribosome;GO:0005  
hypothetiPutative GO:00081fGO:00055fGO:0003674 molecular\_function  
Sld2p Single-stGO:19029fGO:00312fGO:0003688 DNA replication origin binding;GO:0003697  
Oca2p Protein cGO:00353fGO:00057fGO:0004725 protein tyrosine phosphatase activity;GO:0  
Jen1p MonocarbGO:00068fGO:00003fGO:0097079 selenite:proton symporter activity;GO:0015

phosphatidylphosphatidylG0:20011fG0:003427G0:00163f (sce00562) Inositol phosphate metabolism; (sce00562) Putative G0:00081fG0:00056fG0:0003674 molecular\_function

histone H1Histone fG0:00709fG0:00435fG0:00314f (Human) (hsa05322) Systemic lupus erythematosus mRNA-binding Protein cG0:00107fG0:00324fG0:0003729 mRNA binding;G0:0003723 RNA binding;G0:0003723

Aim39p Protein cG0:00081fG0:00319fG0:0003674 molecular\_function

Hualp CytoplasmicG0:00081fG0:00057fG0:0003674 molecular\_function

DUP240 fMember ofG0:00160fG0:00057fG0:0003674 molecular\_function

Cox14p MitochondrialG0:00701fG0:00057fG0:0003674 molecular\_function

Pgd1p Subunit cG0:00511fG0:00708fG0:0001135 RNA polymerase II transcription regulator

Ptr2p Integral G0:00354fG0:00003fG0:00429f (Human) (hsa04974) Protein digestion and absorption

glutamateG0:00064fG0:00171fG0:00048f (sce00860) Porphyrin and chlorophyll metabolism

Ubx2p Bridging G0:00304fG0:00008fG0:00306f (sce04141) Protein processing in endoplasmic reticulum

Obg-like P-loop ATG0:00081fG0:00057fG0:0005525 GTP binding;G0:0032550 purine ribonucleoside

palmitoylSubunit cG0:00182fG0:00301fG0:0019706 protein-cysteine S-palmitoyltransferase activity

dolichyl-Subunit cG0:00182fG0:00082fG0:00045f (M00072) N-glycosylation by oligosaccharyltransferase

Sif2p WD40 repeatG0:00319fG0:00349fG0:0003714 transcription corepressor activity;G0:0003714

hypotheticalPutative G0:01100fG0:00160fG0:0004022 alcohol dehydrogenase (NAD) activity;G0:0004022

putative Putative G0:00004fG0:00057fG0:0004004 ATP-dependent RNA helicase activity;G0:0004004

Ies1p Subunit cG0:00427fG0:00310fG0:0003674 molecular\_function

Fyv8p Protein cG0:00081fG0:00056fG0:0003674 molecular\_function

flavin-dependentFMN-dependentG0:00429fG0:00058fG0:0052874 FMN reductase (NADH) activity;G0:0052873 FMN

ubiquitinSubunit cG0:00431fG0:00446fG0:0061630 ubiquitin protein ligase activity;G0:0061630

hypotheticalProtein cG0:00083fG0:00160fG0:0003674 molecular\_function

Vts1p Flap-structuredG0:00320fG0:00009fG0:0070336 flap-structured DNA binding;G0:0030371 transcription

mRNA-bindingTranslatiG0:00602fG0:00001fG0:0000175 3'-5'-exoribonuclease activity;G0:0000900

Aim3p Protein fG0:00510fG0:00304fG0:0003674 molecular\_function

Hsp70 fCytoplasmicG0:00000fG0:00058fG0:0044183 protein binding involved in protein folding

6-phosphoBeta subunitG0:00616fG0:00059fG0:00038f (sce00051) Fructose and mannose metabolism; (sce00051)

Skp3p Protein cG0:00321fG0:00059fG0:00046f (sce03018) RNA degradation

putative Protein cG0:00315fG0:00092fG0:0016798 hydrolase activity, acting on glycosyl bonds

Tma108p Ribosome-G0:20007fG0:00058fG0:1990593 nascent polypeptide-associated complex binding

hypotheticalHigh osmoticG0:00081fG0:00160fG0:0003674 molecular\_function

hypotheticalProtein cG0:00081fG0:00003fG0:0003674 molecular\_function

Edc1p RNA-bindingG0:00320fG0:00987fG0:0003729 mRNA binding;G0:0003723 RNA binding;G0:0003723

tubulin-cKinesin-fG0:00704fG0:00616fG0:0070463 tubulin-dependent ATPase activity;G0:00085

ATPase-stProtein fG0:00714fG0:00057fG0:0003674 molecular\_function

Ntr2p EssentialG0:00003fG0:00710fG0:0003674 molecular\_function

Scp160p EssentialG0:00007fG0:00003fG0:0001965 G-protein alpha-subunit binding;G0:0003729

isocitrateSubunit cG0:00065fG0:00059fG0:00044f (M00010) Citrate cycle, first carbon oxidation

hypotheticalPutative G0:00081fG0:00057fG0:0003674 molecular\_function

phosphatidylphosphatidylG0:00160fG0:00703fG0:00046f (M00093) Phosphatidylethanolamine (PE) biosynthesis

hypotheticalF-box proteinG0:00311fG0:00190fG0:0030674 protein binding, bridging;G0:0004842 ubiquitin

phosphoglyceratePhosphateG0:00163fG0:00056fG0:00167f (M00002) Glycolysis, core module involving the

Csm4p Protein fG0:00451fG0:00007fG0:0003674 molecular\_function

Pbilp Putative G0:00424fG0:00057fG0:0008080 N-acetyltransferase activity;G0:0016410 N-acetyltransferase

U2 snRNP ComponentG0:00003fG0:00702fG0:0000384 first spliceosomal transesterification activity

carbonateCarbonic G0:00712fG0:00057fG0:00040f (sce00910) Nitrogen metabolism

Rim8p Protein fG0:00014fG0:00098fG0:0003674 molecular\_function

ribosome NucleolarG0:00004fG0:00306fG0:0003674 molecular\_function

NADPH dependentConserveG0:00069fG0:00057fG0:0018548 pentaerythritol trinitrate reductase activity

Xrs2p Protein fG0:00975fG0:00056fG0:00036f (sce03450) Non-homologous end-joining; (sce03450)

cationic Putative G0:00344fG0:00716fG0:0015174 basic amino acid transmembrane transporter

putative Putative G0:00092fG0:00160fG0:0003674 molecular\_function

Yhm2p Citrate fG0:00068fG0:00426fG0:0005371 tricarboxylate secondary active transmembrane

Vps53p Component GO:009015 GO:000095 GO:0003674 molecular\_function  
 endo-1,3-Daughter GO:000095 GO:003045 GO:0052862 glucan endo-1,4-beta-glucanase activity, C  
 peroxin Peroxisome GO:001655 GO:199042 GO:003067 (sce04146) Peroxisome  
 zinc metal Highly c GO:007145 GO:000565 GO:000422 (sce00900) Terpenoid backbone biosynthesis; (C  
 Umelp Component GO:003195 GO:003365 GO:0003714 transcription corepressor activity; GO:0003  
 putative Putative GO:000005 GO:003065 GO:000392 (sce03008) Ribosome biogenesis in eukaryotes  
 succinate Flavoprotein GO:000612 GO:004525 GO:000817 (sce) Citrate cycle, second carbon oxidation,  
 hypothetic Putative GO:000815 GO:000557 GO:0003674 molecular\_function  
 ribonucleoside Subunit c GO:003495 GO:000565 GO:000452 (sce03013) RNA transport  
 Acmlp Pseudosubunit GO:190465 GO:000565 GO:0055105 ubiquitin-protein transferase inhibitor ac  
 Rgclp Putative GO:009037 GO:000575 GO:0016247 channel regulator activity; GO:0098772 mole  
 hypothetic Putative GO:000815 GO:000557 GO:0003674 molecular\_function  
 Utp5p Subunit c GO:004592 GO:003445 GO:0003674 (sce03008) Ribosome biogenesis in eukaryotes  
 SNAP receptor Syntaxin GO:005145 GO:000032 GO:000545 (sce04130) SNARE interactions in vesicular tra  
 Esl2p hEST1A/B GO:000815 GO:199042 GO:0043022 ribosome binding; GO:0043021 ribonucleoprotein  
 hypothetic Putative GO:000815 GO:001602 GO:0003674 molecular\_function  
 Golgi transport Component GO:003225 GO:001711 GO:0003674 molecular\_function  
 Syplp Negative GO:000014 GO:000014 GO:0004857 enzyme inhibitor activity; GO:0030234 enzym  
 Pho9lp Low-affinity GO:200015 GO:199081 GO:0015169 glycerol-3-phosphate transmembrane transpo  
 Sli15p Subunit c GO:003214 GO:000582 GO:0030295 protein kinase activator activity; GO:00192  
 hypothetic Mitochondrion GO:000815 GO:000575 GO:0003674 molecular\_function  
 mitochondrion Mitochondrion GO:003254 GO:000575 GO:0003735 structural constituent of ribosome; GO:0005  
 oxysterol Member of GO:000145 GO:003254 GO:0008142 oxysterol binding; GO:0005545 1-phosphatidy  
 Prp1lp Subunit c GO:000024 GO:000565 GO:000827 (sce03040) Spliceosome  
 Rox3p Subunit c GO:000111 GO:007084 GO:0001135 RNA polymerase II transcription regulator  
 Ubx3p Clathrin GO:003352 GO:004465 GO:0030276 clathrin binding; GO:0005515 protein bindin  
 hypothetic Putative GO:000815 GO:000557 GO:0003674 molecular\_function  
 Irrlp Subunit c GO:000705 GO:003495 GO:000365 (sce04111) Cell cycle - yeast; (sce04113) Meio  
 ribosomal Ribosomal GO:004227 GO:002262 GO:000375 (sce03010) Ribosome  
 import m Subunit c GO:003015 GO:000145 GO:0019904 protein domain specific binding; GO:0005515  
 hypothetic Putative GO:000815 GO:000557 GO:0003674 molecular\_function  
 hypothetic Protein c GO:000815 GO:000565 GO:0003674 molecular\_function  
 putative Putative GO:003155 GO:000927 GO:0004190 aspartic-type endopeptidase activity; GO:00  
 putative Protein v GO:001955 GO:000565 GO:004387 (sce) Methionine salvage pathway; (M00034) Met  
 Grhlp Acetylated GO:000705 GO:000585 GO:0044877 protein-containing complex binding; GO:0005  
 DNA-directed RNA polymerase GO:004275 GO:000575 GO:000105 (sce03020) RNA polymerase; (sce00240) Pyrimidin  
 bis (5'-ac Dinucleoside GO:000915 GO:000575 GO:004771 (sce00230) Purine metabolism  
 Sna3p Protein i GO:003255 GO:000032 GO:0031625 ubiquitin protein ligase binding; GO:004438  
 putative Part of c GO:000635 GO:003001 GO:001685 (sce03018) RNA degradation  
 hypothetic Putative GO:000815 GO:000557 GO:0003674 molecular\_function  
 Xbp1p Transcription GO:003105 GO:000565 GO:0000981 DNA-binding transcription factor activity,  
 Frtl1p Tail-anchored GO:007145 GO:000575 GO:0003674 molecular\_function  
 Rtt103p Protein i GO:001052 GO:001655 GO:0000993 RNA polymerase II complex binding; GO:00431  
 Alylp Alpha amino GO:200035 GO:000575 GO:0031625 ubiquitin protein ligase binding; GO:004438  
 putative A metal-c GO:000647 GO:000565 GO:0051998 protein carboxyl O-methyltransferase activ  
 proteasome Essential GO:004315 GO:000854 GO:003025 (sce03050) Proteasome  
 E2 ubiquitin Ubiquitin r GO:004572 GO:000575 GO:006165 (sce04120) Ubiquitin mediated proteolysis  
 Meflp Mitochondrion GO:007012 GO:000575 GO:0003746 translation elongation factor activity; GO:0  
 transcribed Master re GO:000712 GO:000565 GO:000815 (sce04113) Meiosis - yeast  
 21S rRNA Mitochondrion GO:003115 GO:000575 GO:0008650 rRNA (uridine-2'-O-)-methyltransferase act  
 Arp5p Nuclear c GO:004275 GO:003101 GO:0043140 ATP-dependent 3'-5' DNA helicase activity;  
 2-aminoacyl Protein v GO:000907 GO:000565 GO:0047536 2-aminoacyl transaminase activity; GO:00  
 ornithine Ornithine GO:004245 GO:000575 GO:000455 (sce00220) Arginine biosynthesis; (sce01230) B  
 phenylalanyl Beta subunit GO:000645 GO:000932 GO:000482 (sce00970) Aminoacyl-tRNA biosynthesis

Rnh203p Ribonucleic acid hydrolase activity;GO:004315;GO:003229;GO:0004523 RNA-DNA hybrid ribonuclease activity;GO:0004523  
alpha-ketoglutarate-dependent hydrolase activity;GO:003351;GO:000935;GO:000414 (sce00310) Lysine degradation; (sce) Citrate cycle  
Yet3p Protein c;GO:007097;GO:000578;GO:000367 (sce04141) Protein processing in endoplasmic reticulum  
Srb2p Subunit c;GO:001068;GO:007084;GO:0001094 TFIID-class transcription factor complex  
hypothetical protein GO:003544;GO:000588;GO:0080139 borate efflux transmembrane transporter activity  
Rad28p Protein i;GO:000628;GO:003146;GO:000484 (sce03420) Nucleotide excision repair; (sce04141) DNA replication  
coatome Epsilon-(GO:003251;GO:003012;GO:1990841 promoter-specific chromatin binding;GO:0004523  
Ecm25p Non-essential protein GO:007158;GO:000578;GO:0003674 molecular\_function  
hypothetical protein GO:005508;GO:000032;GO:0003674 molecular\_function  
Bor1p Boron efflux protein GO:003544;GO:000032;GO:0080139 (Human) (hsa04964) Proximal tubule bicarbonate  
Bud21p Component GO:000047;GO:003068;GO:0030515 snoRNA binding;GO:0003723 RNA binding;GO:0003723  
Sen15p Subunit c;GO:000037;GO:000021;GO:0000213 tRNA-intron endonuclease activity;GO:001688  
histone H1 Histone H1 GO:000633;GO:003129;GO:004698 (Human) (hsa05322) Systemic lupus erythematosus  
exosome ribonuclease activity;GO:007104;GO:000017;GO:000372 (sce03018) RNA degradation  
replication fork helicase activity;GO:000627;GO:003138;GO:000368 (sce03430) Mismatch repair; (sce03030) DNA replication  
protoheme heme A biosynthesis;GO:004805;GO:003196;GO:000849 (sce00860) Porphyrin and chlorophyll metabolism  
U2 snRNP Component GO:000024;GO:000568;GO:000367 (sce03040) Spliceosome  
FG-nucleoporin GO:006018;GO:004461;GO:001708 (sce03013) RNA transport  
Pex18p Peroxin; GO:001658;GO:000577;GO:0005515 protein binding;GO:0005488 binding;GO:0003723  
alpha, alpha-glucosidase activity;GO:007146;GO:000578;GO:000458 (sce00500) Starch and sucrose metabolism; (sce00500)  
NAD+ transporter Putative GO:003538;GO:000574;GO:0051724 NAD transmembrane transporter activity;GO:000574  
Ice2p Integral GO:003622;GO:003254;GO:0003674 molecular\_function  
Gdilp GDP dissociation inhibitor GO:004354;GO:000578;GO:0005093 Rab GDP-dissociation inhibitor activity;GO:0005093  
Rgalp GTPase-activator protein GO:000078;GO:003217;GO:000509 (sce04011) MAPK signaling pathway - yeast  
putative protein GO:000662;GO:000578;GO:0004177 aminopeptidase activity;GO:0008238 exopeptidase activity  
Ant1p Peroxisome GO:001588;GO:000577;GO:0015217 ADP transmembrane transporter activity;GO:000577  
hypothetical protein GO:000818;GO:000557;GO:0003674 molecular\_function  
Loh1p Protein i;GO:003047;GO:000582;GO:0003674 molecular\_function  
deoxyhypusine synthase GO:000861;GO:000578;GO:0034038 deoxyhypusine synthase activity;GO:0016765  
proteasome Metalloprotease GO:19029;GO:003451;GO:000484 (sce03050) Proteasome  
aminodeoxychorismate lyase GO:004668;GO:000578;GO:0008696 4-amino-4-deoxychorismate lyase activity;GO:0008696  
Reh1p Cytoplasmic GO:000711;GO:003068;GO:0046872 metal ion binding;GO:0043169 cation binding  
nicotinate and nicotinamide metabolism GO:003438;GO:000568;GO:000030 (sce00760) Nicotinate and nicotinamide metabolism  
Pom34p Subunit c;GO:003047;GO:003133;GO:0017056 structural constituent of nuclear pore;GO:0017056  
proteasome Alpha 2 GO:001049;GO:003451;GO:000429 (sce03050) Proteasome  
chromatin SIR protein GO:000133;GO:009911;GO:0031491 nucleosome binding;GO:0032947 protein-containing  
hypothetical protein GO:000818;GO:003068;GO:0043022 ribosome binding;GO:0043021 ribonucleoprotein complex  
ribosomal protein GO:000644;GO:002262;GO:000372 (sce03010) Ribosome  
Mob2p Activator GO:000711;GO:000598;GO:0030295 protein kinase activator activity;GO:001920  
hypothetical protein GO:001018;GO:000568;GO:0050484 GMP 5'-nucleotidase activity;GO:0002953 5'-nucleotidase activity  
transcription factor General GO:003598;GO:009056;GO:004282 (sce04011) MAPK signaling pathway - yeast; (sce04011)  
putative protein GO:000711;GO:004668;GO:0008496 mannan endo-1,6-alpha-mannosidase activity  
Mss11p Transcription factor GO:003609;GO:000568;GO:000367 (sce04011) MAPK signaling pathway - yeast  
nucleoside biosynthesis GO:000618;GO:000578;GO:000458 (sce) Pyrimidine ribonucleotide biosynthesis  
Avt7p Putative GO:19034;GO:000032;GO:0061459 L-arginine transmembrane transporter activity  
putative protein GO:003321;GO:000588;GO:0052851 ferric-chelate reductase (NADPH) activity;GO:0052851  
histone H3 methyltransferase GO:190438;GO:003509;GO:0034649 histone demethylase activity (H3-monomethyltransferase)  
Pan1p Part of GO:20006;GO:003047;GO:0003779 actin binding;GO:0005509 calcium ion binding  
Agp2p Plasma membrane GO:190227;GO:000032;GO:0015203 polyamine transmembrane transporter activity  
aspartic endopeptidase GO:000644;GO:007148;GO:0042500 aspartic endopeptidase activity, intramembrane  
peptide alpha-N-acetyltransferase GO:001718;GO:003141;GO:0004596 peptide alpha-N-acetyltransferase activity  
RNA-binding protein Subunit c;GO:003496;GO:000568;GO:000458 (sce03008) Ribosome biogenesis in eukaryotes;  
Drn1p Splicing GO:000038;GO:000582;GO:0061632 RNA lariat debranching enzyme activator activity  
transcription factor GO:190046;GO:003151;GO:0000980 RNA polymerase II distal enhancer sequence

|                                 |                                        |            |                                          |            |                                                                    |
|---------------------------------|----------------------------------------|------------|------------------------------------------|------------|--------------------------------------------------------------------|
| Rdr1p                           | Transcription factor                   | GO:0009411 | GO:0005636                               | GO:0000981 | DNA-binding transcription factor activity, RNA polymerase          |
| porphobilinogen deaminase       | Aminolevulinic acid dehydratase        | GO:0006758 | GO:0005826                               | GO:0004651 | (sce00860) Porphyrin and chlorophyll metabolism                    |
| D-lactate dehydrogenase         | D-2-hydroxyglutarate dehydrogenase     | GO:190345  | GO:003125                                | GO:000445  | (sce00620) Pyruvate metabolism                                     |
| Yop1p                           | Reticulocalnexin                       | GO:003258  | GO:007178                                | GO:0005515 | protein binding; GO:0005488 binding; GO:0003674 molecular_function |
| None                            | None                                   | None       | None                                     | None       | None                                                               |
| Rqc1p                           | Component of the 60S ribosomal subunit | GO:199011  | GO:199011                                | GO:0003674 | molecular_function                                                 |
| Csr1p                           | Phosphatidylinositol 3-kinase          | GO:190135  | GO:000562                                | GO:0008526 | phosphatidylinositol transporter activity; GO:0005622              |
| Lam4p                           | Sterol-binding protein                 | GO:012001  | GO:003254                                | GO:0120015 | intermembrane sterol transfer activity; GO:0005622                 |
| Igd1p                           | Cytoplasmic inositol 3-phosphatase     | GO:004581  | GO:000575                                | GO:0004857 | enzyme inhibitor activity; GO:0030234 enzyme activity              |
| protein tyrosine phosphatase    | Essential phosphatase                  | GO:004505  | GO:004272                                | GO:0008565 | protein transporter activity; GO:0051082 unfolded protein binding  |
| translational elongation factor | Translational elongation factor        | GO:0006414 | translational elongation factor activity | GO:0003746 | translation elongation factor activity; GO:0003746                 |
| Swm2p                           | Protein involved in DNA replication    | GO:003626  | GO:000575                                | GO:0003674 | molecular_function                                                 |
| phosphatase                     | Phosphatase                            | GO:003535  | GO:000565                                | GO:0004792 | thiosulfate sulfurtransferase activity; GO:0005652                 |
| hypothetical protein            | Putative protein                       | GO:000815  | GO:000032                                | GO:0003674 | molecular_function                                                 |
| Rad59p                          | Protein involved in DNA recombination  | GO:000075  | GO:000565                                | GO:000551  | (sce03440) Homologous recombination                                |
| DNA-directed RNA polymerase     | RNA polymerase                         | GO:004275  | GO:000566                                | GO:000105  | (sce03020) RNA polymerase; (sce00240) Pyrimidine biosynthesis      |
| nicotinic acid                  | Nicotinic acid                         | GO:003462  | GO:000565                                | GO:000003  | (sce00760) Nicotinate and nicotinamide metabolism                  |
| chaperonin                      | Subunit of chaperonin                  | GO:000645  | GO:000585                                | GO:0051082 | unfolded protein binding; GO:0005524 ATP binding                   |
| hypothetical protein            | Putative protein                       | GO:000815  | GO:000565                                | GO:0003674 | molecular_function                                                 |
| Rab family member               | Endosomal protein                      | GO:003625  | GO:000003                                | GO:000392  | (sce04145) Phagosome; (sce04144) Endocytosis                       |
| hypothetical protein            | Dubious protein                        | GO:000815  | GO:000557                                | GO:0003674 | molecular_function                                                 |
| hypothetical protein            | Protein of unknown function            | GO:000815  | GO:000557                                | GO:0003674 | molecular_function                                                 |
| Sap190p                         | Protein involved in DNA replication    | GO:000209  | GO:000575                                | GO:0003674 | molecular_function                                                 |
| protein kinase                  | Serine kinase                          | GO:200025  | GO:003087                                | GO:000467  | (sce03008) Ribosome biogenesis in eukaryotes                       |
| E2 ubiquitin                    | Ubiquitin                              | GO:003045  | GO:000578                                | GO:006165  | (sce04120) Ubiquitin mediated proteolysis; (sce00000) Ubiquitin    |
| DNA-binding protein             | Transcription factor                   | GO:009773  | GO:000565                                | GO:0000987 | proximal promoter sequence-specific DNA binding                    |
| NADP-dependent enzyme           | NADPH-dependent enzyme                 | GO:003385  | GO:000557                                | GO:003385  | (sce00040) Pentose and glucuronate interconversions                |
| Rph1p                           | JmjC domain protein                    | GO:007054  | GO:003509                                | GO:0051864 | histone demethylase activity (H3-K36 specific)                     |
| Ysw1p                           | Protein involved in DNA replication    | GO:003212  | GO:000565                                | GO:0003674 | molecular_function                                                 |
| Esbp6p                          | Protein involved in DNA replication    | GO:001571  | GO:000578                                | GO:0008028 | monocarboxylic acid transmembrane transporter activity             |
| histone deacetylase             | Class I histone deacetylase            | GO:006158  | GO:000011                                | GO:0032041 | NAD-dependent histone deacetylase activity                         |
| Rox1p                           | Heme-dependent protein                 | GO:00972   | GO:000075                                | GO:0001135 | RNA polymerase II transcription regulator activity                 |
| putative protein                | Putative protein                       | GO:001581  | GO:001989                                | GO:000392  | (Human) (hsa04211) Longevity regulating pathway                    |
| histidine                       | Cytoplasmic protein                    | GO:000642  | GO:000575                                | GO:000482  | (sce00970) Aminoacyl-tRNA biosynthesis                             |
| hypothetical protein            | Pseudogen                              | GO:000815  | GO:001602                                | GO:0003674 | molecular_function                                                 |
| dihydroorotic acid              | Dihydroorotic acid                     | GO:00442   | GO:001989                                | GO:19906   | (sce) Uridine monophosphate biosynthesis, gluconate                |
| diphthine                       | Diphthamine                            | GO:001718  | GO:000575                                | GO:0017178 | diphthine-ammonia ligase activity; GO:001682                       |
| protein kinase                  | Protein kinase                         | GO:00614   | GO:000565                                | GO:000467  | (sce04213) Longevity regulating pathway - multiple                 |
| SWI/SNF complex                 | Catalytic subunit                      | GO:190015  | GO:001651                                | GO:0015616 | DNA translocase activity; GO:0070577 lysine                        |
| chaperonin                      | Subunit of chaperonin                  | GO:000645  | GO:000585                                | GO:0051082 | unfolded protein binding; GO:0005524 ATP binding                   |
| mitochondrial protein           | Mitochondrial protein                  | GO:007077  | GO:000574                                | GO:0015183 | L-aspartate transmembrane transporter activity                     |
| cytochrome                      | Protein                                | GO:005511  | GO:000588                                | GO:0016491 | oxidoreductase activity; GO:0003824 catalytic                      |
| Vps55p                          | Late endosome protein                  | GO:20000   | GO:003442                                | GO:0003674 | molecular_function                                                 |
| glycine                         | Mitochondrial protein                  | GO:001926  | GO:000575                                | GO:00709   | (sce) C1-unit interconversion, eukaryotes; (M                      |
| Srl4p                           | Protein                                | GO:00092   | GO:000575                                | GO:0003674 | molecular_function                                                 |
| Hollp                           | Putative protein                       | GO:000685  | GO:000032                                | GO:0015665 | alcohol transmembrane transporter activity                         |
| hypothetical protein            | Putative protein                       | GO:000815  | GO:000557                                | GO:0003674 | molecular_function                                                 |
| rRNA-binding protein            | Component of the 60S ribosomal subunit | GO:000047  | GO:003204                                | GO:0070181 | small ribosomal subunit rRNA binding; GO:0003674                   |
| Trm12p                          | S-adenosylmethionine                   | GO:003155  | GO:000575                                | GO:0102522 | tRNA 4-demethylwyosine alpha-amino-alpha-carboxyl                  |
| Rfx1p                           | Major transcription factor             | GO:000012  | GO:000565                                | GO:000097  | (sce04111) Cell cycle - yeast                                      |
| Tfslp                           | Inhibitor of protein synthesis         | GO:001095  | GO:0000                                  |            |                                                                    |



Spo71p Meiosis-s G0:00321fG0:00056fG0:0003674 molecular\_function  
ubiquitinRING-fing G0:00165fG0:19904fG0:00048f (sce04146) Peroxisome  
Tsr3p Protein iG0:00304fG0:00056fG0:0016740 transferase activity;G0:0003824 catalytic  
2-isoprofAlpha-isc G0:00090fG0:00057fG0:00038f (sce) Leucine biosynthesis, 2-oxoisovalerate  
3-isoprofBeta-iso G0:00090fG0:00058fG0:00038f (sce00660) C5-Branched dibasic acid metabolism  
hypothetiPutative G0:00081fG0:00057fG0:0003674 molecular\_function  
long-chaiLong chai G0:000167G0:000557G0:01023f (sce) beta-Oxidation, acyl-CoA synthesis; (M0  
Cwh43p GPI lipid G0:00065fG0:00059fG0:0003674 molecular\_function  
ion-transP-type ATG0:00300fG0:00058fG0:0015662 ATPase activity, coupled to transmembrane  
ubiquitinComponent G0:19046fG0:00008fG0:00431f (sce04144) Endocytosis  
Aqr1p Plasma mG0:00329fG0:00003fG0:0008028 monocarboxylic acid transmembrane transpor  
aspartateMitochond G0:00065fG0:00057fG0:00040f (sce00360) Phenylalanine metabolism; (sce0035  
RNA methylProtein iG0:00704fG0:00435fG0:0004809 tRNA (guanine-N2-)-methyltransferase activ  
3,4-dihyc3,4-dihyc G0:00092fG0:00057fG0:00086f (sce00740) Riboflavin metabolism; (sce01110) B  
methioninMethionin G0:00355fG0:00056fG0:0070006 metalloaminopeptidase activity;G0:0004177  
serine/thrDDK (Dbf G0:19049fG0:00314fG0:00046f (sce04111) Cell cycle - yeast; (sce04113) Meio  
aldo-ketXylose ar G0:00195fG0:00058fG0:0004032 alditol:NADP+ 1-oxidoreductase activity;G0  
mitochondMitochond G0:00194fG0:00057fG0:00047f (sce04213) Longevity regulating pathway - mul  
S-methyl-5'-methyl G0:00195fG0:00056fG0:00465f (sce) Methionine salvage pathway; (M00034) Met  
ATP-bindPlasma mG0:00468fG0:00057fG0:00085f (sce02010) ABC transporters  
Ies5p Non-esser G0:00007fG0:00310fG0:0003674 molecular\_function  
hypothetiEssential G0:00081fG0:00160fG0:0003674 molecular\_function  
hypothetiPutative G0:00081fG0:00003fG0:0003674 molecular\_function  
Ssy5p Serine pr G0:00165fG0:00198fG0:0004252 serine-type endopeptidase activity;G0:0008  
Agp3p Low-affir G0:00033fG0:00057fG0:0015171 amino acid transmembrane transporter activ  
phosphatiPhosphati G0:00344fG0:00058fG0:00344f (sce00564) Glycerophospholipid metabolism  
Sas5p Subunit cG0:00063fG0:00332fG0:0004402 histone acetyltransferase activity;G0:0061  
oxysterolProtein sG0:00347fG0:00001fG0:0008142 oxysterol binding;G0:0005545 1-phosphatidy  
Ecm5p Subunit cG0:00347fG0:00702fG0:0034647 histone demethylase activity (H3-trimethyl  
Arc19p Subunit cG0:00343fG0:00304fG0:00037f (sce04144) Endocytosis  
palmitoylPalmitoyl G0:00900fG0:00319fG0:0019706 protein-cysteine S-palmitoyltransferase ac  
bifunctiLeucyl an G0:00301fG0:00056fG0:00043f (sce00590) Arachidonic acid metabolism; (sce0  
putative Putative G0:00068fG0:00003fG0:0052851 ferric-chelate reductase (NADPH) activity;  
Bas1p Myb-relat G0:00511fG0:00056fG0:0001135 RNA polymerase II transcription regulator  
None None None None None None  
Aim34p Protein cG0:00081fG0:00319fG0:0003674 molecular\_function  
ribosomalRibosomal G0:00021fG0:00226fG0:00037f (sce03010) Ribosome  
bifunctiThiamine- G0:00092fG0:00058fG0:00047f (sce00730) Thiamine metabolism; (sce01100) Met  
Caf4p WD40 repG0:00165fG0:00705fG0:0003674 molecular\_function  
inositol Inositol G0:00008fG0:00056fG0:00008f (sce00562) Inositol phosphate metabolism; (sc  
Lsb3p Protein cG0:19000fG0:00304fG0:0051015 actin filament binding;G0:0035091 phosphat  
sedoheptSedohept G0:00463fG0:00056fG0:00502f (M00002) Glycolysis, core module involving th  
None None None None None None  
hypothetiProtein cG0:00081fG0:00056fG0:0003674 molecular\_function  
Cbf2p Essential G0:00009fG0:00315fG0:0019237 centromeric DNA binding;G0:0008301 DNA bin  
myosin 3 One of tvG0:20006fG0:00304fG0:0000146 microfilament motor activity;G0:0003774 mo  
Irc25p Component G0:00704fG0:00056fG0:0003674 molecular\_function  
hypothetiPutative G0:00081fG0:00003fG0:0003674 molecular\_function  
Pih1p Component G0:00004fG0:00972fG0:0005515 protein binding;G0:0005488 binding;G0:0003  
Hsp90 cocCo-chaper G0:00322fG0:00058fG0:0051879 Hsp90 protein binding;G0:0051087 chaperone  
bifunctiAlpha suG0:00183fG0:00059fG0:00046f (sce00900) Terpenoid backbone biosynthesis; (G  
Eap1p eIF4E-asG0:00002fG0:00104fG0:0008190 eukaryotic initiation factor 4E binding;G0  
Rim2p Mitochond G0:19905fG0:00057fG0:0015218 pyrimidine nucleotide transmembrane transp  
Scd6p Repressor G0:00459fG0:00104fG0:0031370 eukaryotic initiation factor 4G binding;G0

tyrosine/Protein iGO:00001fGO:00056fGO:0008138 protein tyrosine/serine/threonine phosphat  
 threo-3-l3-hydroxyGO:00701fGO:00055fGO:00181(Human)(hsa00260)Glycine, serine and threonin  
 asparagirAsparagirGO:00709fGO:00058fGO:00040(sce00250)Alanine, aspartate and glutamate m  
 hypothetiCytoplasmGO:00081fGO:00057fGO:0032266 phosphatidylinositol-3-phosphate binding;G  
 hypothetiProtein cGO:00081fGO:00055fGO:0003674 molecular\_function  
 hypothetiPutative GO:00081fGO:00056fGO:0003674 molecular\_function  
 Mrp8p Protein cGO:00081fGO:00057fGO:0003674 molecular\_function  
 Ysy6p Protein cGO:00309fGO:00057fGO:0003674 molecular\_function  
 CAAX prerType II (GO:00714fGO:00301fGO:00041(sce00900)Terpenoid backbone biosynthesis; (G  
 ubiquitirUbiquitirGO:19046fGO:00001fGO:0034450 ubiquitin-ubiquitin ligase activity;GO:006  
 Osw5p Protein of unknown function with possible role in spore wall assembly; predicted  
 Abp140p AdoMet-dGO:00304fGO:00304fGO:0052735 tRNA (cytosine-3-)-methyltransferase activ  
 hypothetiPutative GO:00081fGO:00055fGO:0003674 molecular\_function  
 putative Major celGO:00315(GO:00092fGO:0005199 structural constituent of cell wall;GO:001  
 cleavage Subunit cGO:00987fGO:00058fGO:00306(sce03015)mRNA surveillance pathway  
 Alb1p ShuttlingGO:00422fGO:00058fGO:0043022 ribosome binding;GO:0043021 ribonucleoprot  
 hypothetiPutative GO:00081fGO:00055fGO:0003674 molecular\_function  
 nitrogen-TranscripGO:00010fGO:00058fGO:0000978 RNA polymerase II proximal promoter sequen  
 MCM DNA lProtein iGO:19029fGO:00711fGO:00171(sce03030)DNA replication; (sce04111)Cell cy  
 Cajlp Nuclear tGO:00165fGO:00058fGO:0003674 molecular\_function  
 Upslp PhosphatiGO:20012fGO:00313fGO:1990050 phosphatidic acid transporter activity;GO:0  
 Puf2p PUF familGO:00002fGO:00057fGO:0003729 mRNA binding;GO:0003723 RNA binding;GO:000  
 hypothetiPutative GO:00158fGO:00160fGO:0008521 acetyl-CoA transmembrane transporter activ  
 pseudouriPseudouriGO:00015fGO:00057fGO:0120159 rRNA pseudouridine synthase activity;GO:00  
 ribosomalRibosomalGO:00004fGO:00226fGO:00037(sce03010)Ribosome  
 transcripEssentialGO:00708fGO:00001fGO:0001156 TFIIIC-class transcription factor complex  
 Mtl1p Putative GO:00421fGO:00058fGO:00036(sce04011)MAPK signaling pathway - yeast  
 None None None None None None  
 putative Nuclear cGO:00000fGO:00306fGO:0008237 metalloproteinase activity;GO:0070011 pepti  
 serine/thSer/Thr lGO:19019(GO:00058fGO:19019(sce04392)Hippo signaling pathway -multiple  
 Mdvlp PeripheraGO:00165fGO:00057fGO:0043130 ubiquitin binding;GO:0032182 ubiquitin-lik  
 amino aciLow-affirGO:00158fGO:00057fGO:0015193 L-proline transmembrane transporter activi  
 None None None None None None  
 hypothetiPutative GO:00081fGO:00055fGO:0003674 molecular\_function  
 14-3-3 f14-3-3 prGO:00315fGO:00104fGO:00508(sce04011)MAPK signaling pathway - yeast  
 hypothetiPutative GO:00081fGO:00003fGO:0003674 molecular\_function  
 dioxygenTryptophGO:00343fGO:00057fGO:00337(sce00380)Tryptophan metabolism; (sce01100)M  
 Sur7p Plasma mGO:00974fGO:00304fGO:0003674 molecular\_function  
 Bud20p C2H2-typeGO:00000fGO:00306fGO:0043023 ribosomal large subunit binding;GO:0043021  
 mitochondMitochondGO:00325fGO:00057fGO:0003735 structural constituent of ribosome;GO:0005  
 Eaf6p Subunit cGO:00439fGO:19904fGO:0043994 histone acetyltransferase activity (H3-K23  
 glutamateNADP(+)-cGO:00065fGO:00057fGO:00043(sce00910)Nitrogen metabolism; (sce00220)Arg  
 D-tyrosylD-Tyr-tRGO:19008fGO:00057fGO:0097358 D-leucyl-tRNA(Leu) deacylase activity;GO:0  
 hypothetiProtein cGO:00081fGO:00058fGO:0043022 ribosome binding;GO:0043021 ribonucleoprot  
 hypothetiPutative protein of unknown function  
 18S rRNA MethyltrGO:00000fGO:00057fGO:0016435 rRNA (guanine) methyltransferase activity;  
 hypothetiProtein cGO:00081fGO:00055fGO:0003674 molecular\_function  
 trifunctiMultifuncGO:00466fGO:00319fGO:00041(M00126)Tetrahydrofolate biosynthesis, GTP =  
 proline cProline cGO:00101fGO:00057fGO:00046(sce00330)Arginine and proline metabolism; (G  
 trans-2-cEnoyl recGO:00427fGO:00057fGO:01027(sce)Fatty acid biosynthesis, elongation, en  
 arginyltArginyl-tGO:00165fGO:00057fGO:0004057 arginyltransferase activity;GO:0016755 tra  
 hypothetiProtein cGO:00081fGO:00003fGO:0003674 molecular\_function  
 proteoliRegulatorGO:00327fGO:00058fGO:0030234 enzyme regulator activity;GO:0098772 molec  
 tRNA dihydDihydrouGO:00029fGO:00056fGO:0102263 tRNA-dihydrouridine17 synthase activity;GO

Ecm21p Protein iGO:00700fGO:00058fGO:0031625 ubiquitin protein ligase binding;GO:004438

U2-type sSplicing GO:00003fGO:00056fGO:0003674 molecular\_function

Bfr1p ComponentGO:00082fGO:00058fGO:0003729 mRNA binding;GO:0003723 RNA binding;GO:000

Got1p HomodimerGO:00421fGO:00001fGO:0003674 molecular\_function

cystathicCystathicGO:00193fGO:00056fGO:00039f(sce00450)Selenocompound metabolism; (sce009

Mtc3p Protein cGO:00061fGO:00057fGO:0004129 cytochrome-c oxidase activity;GO:0016676 o

Pch2p HexamericGO:00515fGO:00057fGO:0016887 ATPase activity;GO:0017111 nucleoside-trip

arylformæFormylkyrGO:00194fGO:00055fGO:00040f(sce00380)Tryptophan metabolism; (sce00630)G

hypothetiPutative GO:00081fGO:00056fGO:0003674 molecular\_function

mitochondMitochondGO:00194fGO:00057fGO:00047f(sce04213)Longevity regulating pathway - mul

Rtg2p Sensor oGO:19000(GO:00466fGO:0051219 phosphoprotein binding;GO:0005515 protein

monothiolGlutathicGO:00310fGO:00058fGO:0015038 glutathione disulfide oxidoreductase activ

mannosyliMannosyliGO:00519fGO:00003fGO:0000030 mannosyltransferase activity;GO:0016758 tr

Sfh5p Non-clasGO:00430(GO:00325fGO:0008526 phosphatidylinositol transporter activity;G

Sm-like lLsm (LikeGO:00304fGO:00056fGO:00037f(sce03018)RNA degradation; (sce03040)Spliceo

Arclp Protein tGO:00513fGO:00171(GO:0004831 tyrosine-tRNA ligase activity;GO:0080025 p

exosome rExosome rGO:00710fGO:00001fGO:00170f(sce03018)RNA degradation

4-nitroplConserveGO:00468fGO:00056fGO:00089f(Human) (hsa00630)Glyoxylate and dicarboxylate

Kre5p Protein rGO:00708fGO:00057fGO:00039f(sce04141)Protein processing in endoplasmic

Bug1p Cis-golgiGO:00068fGO:00058(GO:0003674 molecular\_function

Pub1p Poly (A)-GO:00340fGO:00104fGO:0008266 poly(U) RNA binding;GO:0008187 poly-pyrimi

Arg80p TranscripGO:19000fGO:00056fGO:0000987 proximal promoter sequence-specific DNA bi

Hda3p Subunit cGO:00109fGO:00708fGO:0004407 histone deacetylase activity;GO:0033558 pr

translatieIF3a suGO:00021fGO:00715fGO:00037f(sce03013)RNA transport

guanine rGuanine rGO:00068fGO:00058fGO:0005096 GTPase activator activity;GO:0030695 GTPas

Ybp2p Central lGO:00070fGO:00435(GO:0003674 molecular\_function

hypothetiPutative GO:00081fGO:00055fGO:0003674 molecular\_function

Mfg1p RegulatorGO:00081fGO:00056fGO:0003674 molecular\_function

Nrd1 comRNA-bindGO:00710fGO:00356fGO:0001068 transcription regulatory region RNA bindin

orotate lMinor orGO:00442(GO:00057fGO:00045f(sce)Uridine monophosphate biosynthesis, glu

Apl4p Gamma-adGO:00068fGO:00301fGO:00302f(Human) (hsa04142)Lysosome

Rav1p Subunit cGO:00070fGO:00432fGO:0003674 molecular\_function

Twf1p TwinfilirGO:00510fGO:00304fGO:0003785 actin monomer binding;GO:0051015 actin fil

Sec17p Alpha-SNfGO:00354fGO:00003fGO:00054f(sce04138)Autophagy - yeast

Zdslp Protein vGO:00064(GO:00059fGO:0004864 protein phosphatase inhibitor activity;GO:0

Pin4p Protein iGO:20008fGO:00710fGO:0003729 mRNA binding;GO:0003723 RNA binding;GO:000

Trklp ComponentGO:00300(GO:00451fGO:0140107 high-affinity potassium ion transmembrane

serine/tlProtein lGO:19001fGO:00056fGO:00046f(sce04138)Autophagy - yeast

Bud3p Guanine rGO:00071fGO:00001fGO:0005089 Rho guanyl-nucleotide exchange factor acti

threonylcProtein iGO:00029fGO:00007fGO:0061710 L-threonylcarbamoyladenylate synthase;GO:0

Atg19p Receptor GO:00304fGO:00342fGO:0030674 protein binding, bridging;GO:0060090 molec

Fub1p ProteasomGO:00063fGO:00055fGO:0070628 proteasome binding;GO:0044877 protein-cont

divalent Divalent GO:00068fGO:00003fGO:0015086 cadmium ion transmembrane transporter acti

exosome rExosome rGO:00710fGO:00001fGO:00301f(sce03018)RNA degradation

DNA-direcSubunit cGO:00431fGO:00436fGO:00083f(sce03410)Base excision repair; (sce03440)Ho

Wsc3p Sensor-trGO:00302fGO:00433fGO:00048f(sce04139)Mitophagy - yeast; (sce04011)MAPK

DNA-binditTranscripGO:00360fGO:00007fGO:0000987 proximal promoter sequence-specific DNA bi

transketcTransketcGO:00060fGO:00058fGO:00048f(M00007)Pentose phosphate pathway, non-oxida

cystathicCystathicGO:00193fGO:00104fGO:00041f(sce)Cysteine biosynthesis, homocysteine + s

hypothetiPutative GO:00081fGO:00055fGO:0003674 molecular\_function

guanine rGuanine rGO:19905(GO:00435fGO:0005085 guanyl-nucleotide exchange factor activity

carboxypVacuolar GO:00469fGO:00003fGO:00041f(Human) (hsa04614)Renin-angiotensin system; (l

DNA repliSubunit cGO:00007fGO:00711fGO:0003674 molecular\_function

Hap5p Subunit cGO:00004fGO:00166(GO:0000978 RNA polymerase II proximal promoter sequen

Rod1p Alpha-arr GO:000075 GO:000582 GO:0031625 ubiquitin protein ligase binding; GO:004438

Swi1p Subunit c GO:00314 GO:001651 GO:0015616 DNA translocase activity; GO:0001102 RNA po

RNA-bind RNA-bind GO:00004 GO:00057 GO:0003723 RNA binding; GO:0003676 nucleic acid bindin

sphingos Sphingani GO:00301 GO:00057 GO:000017 (sce00600) Sphingolipid metabolism; (sce01100)

hypotheti Putative GO:00711 GO:000582 GO:0016807 cysteine-type carboxypeptidase activity; GO

diacylgly Diacylgly GO:00066 GO:00301 GO:00041 (sce00564) Glycerophospholipid metabolism; (s

ribosomal Ribosomal GO:00021 GO:00226 GO:00037 (sce03010) Ribosome

1-acylgly 1-acyl-sr GO:00160 GO:000581 GO:00038 (sce00561) Glycerolipid metabolism; (sce00564)

Zn(2+) t Vacuolar GO:00068 GO:00003 GO:0005385 zinc ion transmembrane transporter activit

Ytp1p Probable GO:00081 GO:00160 GO:0003674 molecular\_function

amino aci Putative GO:19034 GO:00003 GO:0061459 L-arginine transmembrane transporter activ

ribosomal Ribosomal GO:00021 GO:00226 GO:00037 (sce03010) Ribosome

Mrx5p Protein that associates with mitochondrial ribosome; homozygous diploid deletion

replicati Subunit c GO:00062 GO:00056 GO:00430 (sce03440) Homologous recombination; (sce03430)

Fr22p Tail-anch GO:00714 GO:00057 GO:0003674 molecular\_function

U6 snRNP Splicing GO:00002 GO:00056 GO:0017070 U6 snRNA binding; GO:0017069 snRNA binding;

None None None None None None

tRNA met12' -O-rib GO:00304 GO:00057 GO:0008175 tRNA methyltransferase activity; GO:0008173

cAMP-depe Regulator GO:00614 GO:00059 GO:00048 (Human) (hsa04910) Insulin signaling pathway

putative AGC kinas GO:00181 GO:00056 GO:0004674 protein serine/threonine kinase activity; G

Rielp Putative GO:00063 GO:00104 GO:0003729 mRNA binding; GO:0003723 RNA binding; GO:000

allantoat Allantoat GO:00157 GO:00003 GO:0015124 allantoate transmembrane transporter activ

endopepti Catalytic GO:00066 GO:00427 GO:00082 (sce03060) Protein export

TFIIH con Cyclin as GO:00708 GO:00709 GO:00083 (sce03022) Basal transcription factors; (sce0

GTP-bind Member of GO:19038 GO:00104 GO:0005525 GTP binding; GO:0032550 purine ribonucleosi

S-adenosy S-adenosy GO:00183 GO:00356 GO:0008276 protein methyltransferase activity; GO:0008

DEAD-box ATP-deper GO:00710 GO:00057 GO:00040 (sce03040) Spliceosome

metalloan Vacuolar GO:00322 GO:00342 GO:0070006 metalloaminopeptidase activity; GO:0004177

Boilp Protein i GO:00071 GO:00433 GO:0005543 phospholipid binding; GO:0008289 lipid bind

None None None None None None

rRNA-proc Protein i GO:00004 GO:00800 GO:0003729 mRNA binding; GO:0003723 RNA binding; GO:000

mitochondr Mitochondr GO:00325 GO:00057 GO:00198 (sce03010) Ribosome

hypotheti Putative GO:00081 GO:00057 GO:0003674 molecular\_function

inorganic Cytoplasm GO:00067 GO:00057 GO:00044 (sce00190) Oxidative phosphorylation

putative Putative GO:00064 GO:00057 GO:0003724 RNA helicase activity; GO:0003743 translati

rRNA-proc Component GO:00004 GO:00306 GO:0003674 molecular\_function

cornichor COPII-co GO:00071 GO:00301 GO:0038024 cargo receptor activity; GO:0003674 molecu

hypotheti Protein c GO:00081 GO:00057 GO:0003674 molecular\_function

hypotheti Putative GO:00081 GO:00057 GO:0003674 molecular\_function

Esc1p Protein i GO:00343 GO:00007 GO:0003674 molecular\_function

sedohept Transald GO:00090 GO:00056 GO:00048 (M00007) Pentose phosphate pathway, non-oxida

ribose-5- Ribose-5- GO:00090 GO:00056 GO:00047 (M00007) Pentose phosphate pathway, non-oxida

Ecm23p Non-esser GO:00071 GO:00057 GO:0008270 zinc ion binding; GO:0043565 sequence-speci

putative Flavin-de GO:00067 GO:00057 GO:00086 (M00128) Ubiquinone biosynthesis, eukaryotes,

Lm1p Homolog c GO:00004 GO:00057 GO:0003674 molecular\_function

hypotheti Protein t GO:00704 GO:00058 GO:0003674 molecular\_function

aspartate Aspartyl- GO:00064 GO:00171 GO:00048 (sce00970) Aminoacyl-tRNA biosynthesis

mitochondr Mitochondr GO:00325 GO:00057 GO:00037 (sce03010) Ribosome

Lcp5p Essential GO:00004 GO:00320 GO:0003674 molecular\_function

Dat1p DNA bindi GO:00001 GO:00058 GO:0003680 AT DNA binding; GO:1990837 sequence-specifi

Sec9p t-SNARE i GO:00069 GO:00059 GO:0019905 syntaxin binding; GO:0005484 SNAP receptor

Rgl1p Regulator GO:00009 GO:00009 GO:0003674 molecular\_function

tetrahyd Folylpol GO:00469 GO:00057 GO:00043 (M00126) Tetrahydrofolate biosynthesis, GTP =

Rix1p Component GO:00062 GO:00973 GO:0003682 chromatin binding; GO:0005488 binding; GO:00

hypotheticalDubious cGO:00081fGO:000557GO:0003674 molecular\_function  
 Yox1p Homeobox GO:00719fGO:00007fGO:00009f(sce04111)Cell cycle - yeast  
 Jem1p DnaJ-likeGO:00007fGO:00319fGO:00517f(sce04141)Protein processing in endoplasmic :  
 flavodoxinProtein vGO:00551fGO:00451fGO:0003955 NAD(P)H dehydrogenase (quinone) activity;G  
 DNA polynSecond lGO:00708fGO:00086fGO:00303f(sce03410)Base excision repair; (sce03030)DN  
 Vnx1p Calcium/fGO:00357fGO:19908fGO:0015369 calcium:proton antiporter activity;GO:0051  
 bifunctionalGlycerol GO:00160fGO:00301fGO:00162f(sce00561)Glycerolipid metabolism; (sce00564)  
 mRNA splicingCore Sm fGO:00003fGO:00056fGO:19909f(sce03040)Spliceosome  
 putative Putative GO:00300fGO:00003fGO:0015086 cadmium ion transmembrane transporter acti  
 dynamin-1Dynamin-1GO:00609fGO:00304fGO:00039f(sce04139)Mitophagy - yeast  
 mitochondriaMitochondriaGO:00000fGO:00057fGO:00037f(sce03010)Ribosome  
 transcriptionTranscriptionGO:00611fGO:00058fGO:0003714 transcription corepressor activity;GO:0003  
 Ptr3p ComponentGO:00432(GO:00198fGO:0003674 molecular\_function  
 diterpene, fForms ofGO:00194(GO:19044fGO:00455f(sce00900)Terpenoid backbone biosynthesis; (s  
 Sla2p Adaptor fGO:00071fGO:00301fGO:0035615 clathrin adaptor activity;GO:0043325 phosph  
 ribosome EssentialGO:00004fGO:00306fGO:0003674 molecular\_function  
 S-adenosylMethyltransferaseGO:00349fGO:00007fGO:0008757 S-adenosylmethionine-dependent methyltrans  
 None None None None None None  
 Tealp Ty1 enhancerGO:00063fGO:00512fGO:0000981 DNA-binding transcription factor activity,  
 hypotheticalPutative GO:00081fGO:000557GO:0003674 molecular\_function  
 hypotheticalPutative protein of unknown function; the authentic, non-tagged protein is detec  
 transcriptionTFIIIF (TrGO:00011fGO:00056fGO:00011f(sce03022)Basal transcription factors  
 hypotheticalProtein cGO:00081fGO:000557GO:0046872 metal ion binding;GO:0043169 cation bindin  
 septin CComponentGO:00311(GO:00001fGO:0010314 phosphatidylinositol-5-phosphate binding;G  
 Bem2p Rho GTPaseGO:00350fGO:00056fGO:00050f(sce04011)MAPK signaling pathway - yeast  
 hypotheticalMitochondriaGO:00090fGO:00325fGO:0003729 mRNA binding;GO:0003723 RNA binding;GO:000  
 hypotheticalPutative GO:00081fGO:000557GO:0003674 molecular\_function  
 hypoxanthineDimeric lGO:00322fGO:00056fGO:00526f(sce00230)Purine metabolism; (sce01110)Biosyn  
 anaphase ProcessinGO:19046fGO:00056fGO:00616f(sce04120)Ubiquitin mediated proteolysis; (s  
 hypotheticalPutative GO:00081fGO:00160fGO:0003674 molecular\_function  
 None None None None None None  
 Sdh8p Protein fGO:00345fGO:00057fGO:0044183 protein binding involved in protein foldin  
 hexaprenylO-methylGO:00067fGO:00057fGO:00615f(M00128)Ubiquinone biosynthesis, eukaryotes,  
 cyclin CIG1 cyclinGO:00070fGO:00003(GO:00165f(sce04011)MAPK signaling pathway - yeast; (s  
 ribosomalRibosomalGO:00021fGO:00226fGO:00037f(sce03010)Ribosome  
 Ldb18p ComponentGO:00001fGO:00002fGO:0003674 molecular\_function  
 Erilp EndoplasmicGO:00065(GO:00005(GO:00050f(sce00563)Glycosylphosphatidylinositol (GPI)-  
 NAD+ transporterMitochondriaGO:00068fGO:00057fGO:0005477 pyruvate secondary active transmembrane tr  
 Mft1p Subunit cGO:00064(GO:00004fGO:0032947 protein-containing complex scaffold activi  
 glycerolGlycerolGO:00060fGO:00092fGO:00043f(M00002)Glycolysis, core module involving th  
 putative Putative GO:00510fGO:00469fGO:0015288 porin activity;GO:0008308 voltage-gated an  
 Cax4p Dolichyl GO:00064fGO:00301fGO:00478f(sce00510)N-Glycan biosynthesis  
 Nat2p Protein cGO:00171fGO:00057fGO:0016746 transferase activity, transferring acyl gr  
 histone cHistone cGO:00602fGO:00350fGO:00518f(sce04213)Longevity regulating pathway - mul  
 long-chainLong chainGO:19053fGO:00104fGO:01023f(sce)beta-Oxidation, acyl-CoA synthesis; (MO  
 serine/threonineProtein lGO:00901fGO:00057fGO:0004674 protein serine/threonine kinase activity;G  
 Ras familyGTP-bindingGO:00071fGO:00059fGO:00039f(Human) (hsa05211)Renal cell carcinoma; (hsa0  
 Devlp Protein cGO:00081fGO:00358fGO:0003674 molecular\_function  
 None None None None None None  
 Crflp TranscriptionGO:00106fGO:00007fGO:0003714 transcription corepressor activity;GO:0003  
 Bstlp GPI inositolGO:00066fGO:00057fGO:00501f(sce00563)Glycosylphosphatidylinositol (GPI)-  
 Nrmlp TranscriptionGO:00719fGO:00309(GO:0070491 repressing transcription factor binding;GO  
 protein lProtein lGO:00181(GO:00005(GO:0009931 calcium-dependent protein serine/threonine  
 hypotheticalDubious cGO:00081fGO:00160fGO:0003674 molecular\_function

protein Essential GO:004684 GO:003068 GO:000467 (sce03008) Ribosome biogenesis in eukaryotes  
 putative Probable GO:000000 GO:000032 GO:000000 (sce00513) Various types of N-glycan biosynthesis  
 Pdr8p Transcription GO:003603 GO:000562 GO:0000978 RNA polymerase II proximal promoter sequence  
 Dad3p Essential GO:005198 GO:004272 GO:0051010 microtubule plus-end binding; GO:0008017 microtubule plus-end binding  
 Cap1p Alpha subunit GO:005101 GO:000829 GO:005101 (sce04144) Endocytosis  
 mannosyltransferase Mannosyltransferase GO:000000 GO:000015 GO:0000026 alpha-1,2-mannosyltransferase activity; GO:0000026  
 protein Putative GO:000612 GO:000574 GO:000817 (sce) Citrate cycle, second carbon oxidation, second carbon oxidation  
 Pin3p Negative GO:003431 GO:003047 GO:0003674 molecular\_function  
 Arf family Glucose-6-phosphate GO:001051 GO:000598 GO:000392 (sce04144) Endocytosis  
 Yea4p Uridine CTPase GO:003422 GO:003017 GO:0005462 UDP-N-acetylglucosamine transmembrane transporter activity  
 Yih1p Negative GO:000646 GO:000584 GO:1905538 polysome binding; GO:0004860 protein kinase activity  
 Uga3p Transcription GO:000108 GO:000562 GO:0001010 RNA polymerase II sequence-specific DNA binding  
 type 2C Mitochondrial pyruvate dehydrogenase complex GO:190418 GO:000575 GO:0004741 [pyruvate dehydrogenase (lipoamide)] phosphatase  
 heat shock O-mannosyltransferase GO:003151 GO:000562 GO:0005199 structural constituent of cell wall; GO:0005199  
 Ctk3p Gamma subunit GO:007161 GO:0070692 CTDK-1 complex; GO:0008024 cyclin/CDK positive transcription factor activity  
 hypothetical Putative GO:000815 GO:000557 GO:0003674 molecular\_function  
 nicotinate Nicotinate GO:003462 GO:000562 GO:000030 (sce00760) Nicotinate and nicotinamide metabolism  
 RNA-processing RNA-binding GO:190351 GO:000584 GO:000366 (sce03015) mRNA surveillance pathway  
 Mba1p Membrane protein GO:003297 GO:000574 GO:0043022 ribosome binding; GO:0043021 ribonucleoprotein complex  
 None None None None None None  
 Mch5p Plasma membrane protein GO:003221 GO:000588 GO:0032217 riboflavin transmembrane transporter activity  
 mitochondrial Mitochondrial protein GO:003254 GO:000576 GO:0003735 structural constituent of ribosome; GO:000576  
 hypothetical Putative GO:000815 GO:000032 GO:0003674 molecular\_function  
 protein Putative GO:000612 GO:000574 GO:000817 (sce) Citrate cycle, second carbon oxidation, second carbon oxidation  
 putative Nitrogenase protein GO:000652 GO:000575 GO:005015 (Human) (hsa00250) Alanine, aspartate and glutamate metabolism  
 ADP-ribosylation Phosphatase GO:000638 GO:000557 GO:0047407 ADP-ribosyl-[dinitrogen reductase] hydrolase activity  
 serine protease Protein GO:003151 GO:000927 GO:0005199 structural constituent of cell wall; GO:0005199  
 Atg3p E2-like protein GO:004488 GO:006191 GO:001977 (sce04136) Autophagy - other; (sce04138) Autophagy  
 putative Putative GO:000597 GO:000575 GO:0019888 protein phosphatase regulator activity; GO:000597  
 Bud8p Protein GO:000028 GO:000598 GO:0003674 molecular\_function  
 Pam18p Subunit GO:003015 GO:000141 GO:0001671 ATPase activator activity; GO:0060590 ATPase activity  
 Ask1p Essential GO:005198 GO:004272 GO:0051010 microtubule plus-end binding; GO:0008017 microtubule plus-end binding  
 Dph2p Protein GO:001718 GO:000575 GO:0016740 transferase activity; GO:0003824 catalytic activity  
 aldehyde Mitochondrial protein GO:000674 GO:004264 GO:000403 (sce00410) beta-Alanine metabolism; (sce00280) beta-Alanine metabolism  
 Pcs60p Oxalyl-CoA ligase GO:003361 GO:000578 GO:0050203 oxalate-CoA ligase activity; GO:0016405 CoA ligase activity  
 DUP240 farnesyltransferase Putative GO:001605 GO:003066 GO:0003674 molecular\_function  
 Aps3p Small subunit GO:000662 GO:003012 GO:000856 (Human) (hsa04142) Lysosome  
 Cbp3p Mitochondrial protein GO:003455 GO:006167 GO:0043022 ribosome binding; GO:0043021 ribonucleoprotein complex  
 hypothetical Putative GO:003421 GO:000562 GO:0005351 carbohydrate:proton symporter activity; GO:0005351  
 Rax1p Protein GO:000028 GO:000598 GO:0003674 molecular\_function  
 Don1p Meiosis-specific protein GO:003044 GO:007005 GO:0031624 ubiquitin conjugating enzyme binding; GO:0031624  
 Gis4p CAAX box binding GO:000687 GO:000588 GO:0003674 molecular\_function  
 trans-hexaprenyl pyrophosphate GO:000674 GO:000574 GO:000001 (sce00900) Terpenoid backbone biosynthesis; (sce00900) Terpenoid backbone biosynthesis  
 chitinase Mannosyltransferase GO:000645 GO:000578 GO:000457 (sce) N-glycan precursor biosynthesis; (M00051) N-glycan precursor biosynthesis  
 nucleotide Pyrimidine nucleoside GO:000621 GO:000557 GO:000829 (sce00760) Nicotinate and nicotinamide metabolism  
 exocyst Essential GO:009052 GO:000562 GO:0003674 molecular\_function  
 Dad4p Essential GO:005198 GO:004272 GO:0051010 microtubule plus-end binding; GO:0008017 microtubule plus-end binding  
 linker nucleosome Linker nucleosome GO:000000 GO:004461 GO:001705 (sce03013) RNA transport  
 hypothetical Putative GO:000815 GO:000557 GO:0003674 molecular\_function  
 Rav2p Subunit GO:000703 GO:004329 GO:0003674 molecular\_function  
 snoRNP core Subunit GO:003112 GO:009066 GO:003451 (sce03008) Ribosome biogenesis in eukaryotes  
 Stp3p Zinc-finger protein GO:000815 GO:000562 GO:0043565 sequence-specific DNA binding; GO:0003677 DNA binding  
 serine/threonine Cdc42p-activated protein kinase GO:199087 GO:000598 GO:004836 (sce04011) MAPK signaling pathway - yeast  
 putative Putative GO:000924 GO:000575 GO:001697 (sce00785) Lipoic acid metabolism; (sce01100) Lipoic acid metabolism

hypothetiProtein cGO:00081fGO:000584GO:0043022 ribosome binding;GO:0043021 ribonucleoprote  
 oligo-1, (IsomaltaseGO:00000fGO:00055fGO:00045f(sce00052)Galactose metabolism; (sce00500)St  
 Usvlp Putative GO:00614fGO:00056fGO:0043565 sequence-specific DNA binding;GO:0003677 D  
 Atp25p MitochondGO:00336fGO:00057fGO:0003674 molecular\_function  
 hypothetiPutative GO:00081fGO:00057fGO:0003674 molecular\_function  
 serine--tCytosolicGO:00064fGO:00104fGO:00048f(sce00970)Aminoacyl-tRNA biosynthesis  
 type 2C fType 2C fGO:00001fGO:00056fGO:1990439 MAP kinase serine/threonine phosphatase ac  
 Gpb1p MultisteGO:00102fGO:00058fGO:0004862 cAMP-dependent protein kinase inhibitor ac  
 mannosyltPutative GO:00000fGO:00003fGO:00000f(sce00514)Other types of O-glycan biosynthes  
 Fig2p Cell wallGO:00007fGO:00092fGO:0003674 molecular\_function  
 hypothetiProtein cGO:00081fGO:00055fGO:0003674 molecular\_function  
 Sfglp Nuclear fGO:00071fGO:00056fGO:0003674 molecular\_function  
 Sas4p Subunit cGO:00063fGO:00332fGO:0004402 histone acetyltransferase activity;GO:0061  
 triglycerPhospholiGO:00344fGO:00325fGO:00048f(sce)Acylglycerol degradation; (M00098)Acylg  
 t-SNARE scis-GolgiGO:00482fGO:00058fGO:00054f(sce04130)SNARE interactions in vesicular tra  
 GTP-Rho fSubunit cGO:00905fGO:00056fGO:0017049 GTP-Rho binding;GO:0005546 phosphatidylin  
 protein sRegulatorGO:19034fGO:00314fGO:00435f(sce04111)Cell cycle - yeast; (sce04113)Meio  
 hypothetiProtein cGO:00081fGO:00160fGO:0003674 molecular\_function  
 Hot13p Zinc-binGO:00450fGO:00057fGO:0008270 zinc ion binding;GO:0046914 transition met  
 Ies2p Protein tGO:00063fGO:00310fGO:0003677 DNA binding;GO:0003676 nucleic acid bindin  
 hypothetiPutative GO:00070fGO:00160fGO:0003674 molecular\_function  
 Kel2p Protein tGO:00903fGO:19906fGO:0003674 molecular\_function  
 Thi73p Putative GO:00550fGO:00057fGO:0022857 transmembrane transporter activity;GO:0005  
 hypothetiPutative GO:00081fGO:00055fGO:0003674 molecular\_function  
 DUP240 fPutative GO:00160fGO:00003fGO:0003674 molecular\_function  
 proteasomNon-ATPasGO:00432fGO:00085fGO:00315f(sce03050)Proteasome  
 GTPase NfMember ofGO:00070fGO:00058fGO:0003924 GTPase activity;GO:0005525 GTP binding;GO:  
 telomerasComponentGO:00070fGO:00056fGO:0033680 ATP-dependent DNA/RNA helicase activity;GO  
 mitochondMitochondGO:00304fGO:00057fGO:0003735 structural constituent of ribosome;GO:0005  
 CTP syntfMajor CTfGO:00442fGO:00972fGO:00038f(sce)Pyrimidine ribonucleotide biosynthesis,  
 Mic12p ComponentGO:00424fGO:00616fGO:0003674 molecular\_function  
 putative Putative GO:00065fGO:00057fGO:00801f(sce00920)Sulfur metabolism; (sce00270)Cyste  
 Spglp Protein rGO:00081fGO:00319fGO:0003674 molecular\_function  
 Caf120p Part of tGO:00321fGO:00059fGO:00046f(sce03018)RNA degradation  
 type I HfType I HfGO:00357fGO:00723fGO:00016f(sce04141)Protein processing in endoplasmic  
 Taf3p TFIID suGO:00511fGO:00056fGO:00162f(sce03022)Basal transcription factors  
 coatomer Gamma suGO:00068fGO:00301fGO:0005198 structural molecule activity;GO:0003674 mo  
 putative Putative GO:00009fGO:00009fGO:0004835 tubulin-tyrosine ligase activity;GO:001688  
 adenylnMember ofGO:00104fGO:00058fGO:00007f(sce04141)Protein processing in endoplasmic  
 Cox19p Protein rGO:00336fGO:00057fGO:0005507 copper ion binding;GO:0046914 transition m  
 glucan 1, IntracellGO:00059fGO:00056fGO:00043f(sce00500)Starch and sucrose metabolism; (sc  
 translatiConstituGO:00000fGO:00306fGO:00430f(sce03008)Ribosome biogenesis in eukaryotes  
 Dip5p DicarboxyGO:00707fGO:00003fGO:0015183 L-aspartate transmembrane transporter acti  
 protein cProtein cGO:00454fGO:00057fGO:00191f(sce04141)Protein processing in endoplasmic  
 Kar4p TranscriGO:00073fGO:00058fGO:0003700 DNA-binding transcription factor activity;  
 Ape3p Vacuolar GO:00070fGO:00003fGO:0004177 aminopeptidase activity;GO:0008238 exopept  
 ATP-deperHexamericGO:00325fGO:00332fGO:0043141 ATP-dependent 5'-3' DNA helicase activity;  
 carnitinOuter mitGO:00094fGO:00057fGO:00040f(sce04146)Peroxisome  
 acetyl-CcProtein vGO:00196fGO:00057fGO:00087f(sce00620)Pyruvate metabolism  
 SCF ubiquitF-Box prGO:00311fGO:00190fGO:0004842 ubiquitin-protein transferase activity;GO:  
 thioredoCytoplasmGO:00800fGO:00001fGO:0015035 protein disulfide oxidoreductase activity;  
 beclin 1 Subunit cGO:00069fGO:00342fGO:00036f(sce04136)Autophagy - other; (sce04138)Autopl  
 isoleucirCytoplasmGO:00064fGO:00058fGO:00048f(sce00970)Aminoacyl-tRNA biosynthesis  
 prephenatPrephenatGO:00065fGO:00057fGO:00089f(sce00400)Phenylalanine, tyrosine and trypto

Abmlp Protein cGO:00002fGO:00055fGO:0003674 molecular\_function  
 DNA-binditTranscripGO:00070fGO:00056fGO:00360f(sce04111)Cell cycle - yeast  
 hypothetiPutative GO:00081fGO:00055fGO:0003674 molecular\_function  
 Ncs2p Protein rGO:00021fGO:00058fGO:00167f(sce04122)Sulfur relay system  
 U4/U6-U5 Lsm (LikeGO:00339fGO:00056fGO:00037f(sce03018)RNA degradation; (sce03040)Spliceo  
 Spg3p Protein rGO:00081fGO:00057fGO:0003674 molecular\_function  
 hypothetiPutative protein of unknown function with similarity to F-box proteins; interact  
 threonineThreonyl-GO:00064fGO:00057fGO:00048f(sce00970)Aminoacyl-tRNA biosynthesis  
 U4/U6-U5 17-kDa ccGO:00003fGO:00465fGO:00036f(sce03040)Spliceosome  
 Vps45p Protein cGO:00355fGO:00312(GO:00001f(sce04144)Endocytosis; (sce04138)Autophagy -  
 Rim13p Calpain-IGO:00164fGO:00055fGO:0004198 calcium-dependent cysteine-type endopeptid  
 Mpolp Protein iGO:00465fGO:00057fGO:0003674 molecular\_function  
 F1F0 ATP Gamma suGO:00159fGO:00057fGO:00469f(sce00190)Oxidative phosphorylation; (sce011  
 Ioc3p Subunit cGO:00070fGO:00364fGO:0031491 nucleosome binding;GO:0016887 ATPase activ  
 high-affiHigh-affiGO:00156fGO:00058fGO:0005375 copper ion transmembrane transporter activ  
 Rtg1p TranscripGO:00714(GO:00056fGO:0000981 DNA-binding transcription factor activity,  
 glutathicPossible GO:00617fGO:00009fGO:0019172 glyoxalase III activity;GO:0016836 hydro-l  
 putative Putative GO:00325fGO:00057fGO:00037f(sce03010)Ribosome  
 None None None None None None  
 translatiGamma suGO:00459(GO:00436fGO:00313f(sce03013)RNA transport  
 Lrs4p NucleolarGO:00345(GO:00335fGO:00036f(sce04113)Meiosis - yeast  
 Yhi9p Protein cGO:00309fGO:00055fGO:0016853 isomerase activity;GO:0003824 catalytic ac  
 Vps62p Vacuolar GO:00066fGO:00003fGO:0003674 molecular\_function  
 protein eProtein eGO:00199fGO:00321fGO:00352f(sce03013)RNA transport; (sce04011)MAPK sign  
 Vms1p ComponentGO:00726fGO:00362fGO:0004045 aminoacyl-tRNA hydrolase activity;GO:00048  
 Pex19p ChaperoneGO:00450fGO:19904fGO:00333f(sce04146)Peroxisome  
 25S rRNA MethyltraGO:00704fGO:00057fGO:0070042 rRNA (uridine-N3-)-methyltransferase activ  
 Stmlp Protein rGO:00435fGO:00058fGO:0045142 triplex DNA binding;GO:0042162 telomeric D  
 condensirSubunit cGO:00071fGO:00007fGO:00168f(sce04111)Cell cycle - yeast  
 bifuncticProtein rGO:00329fGO:00057fGO:0008320 protein transmembrane transporter activity  
 Alf1p Alpha-tuGO:00070fGO:00058fGO:0043014 alpha-tubulin binding;GO:0015631 tubulin b  
 None None None None None None  
 condensirSubunit cGO:20003fGO:00007fGO:00725f(sce04111)Cell cycle - yeast  
 Mcp2p MitochondGO:00550fGO:00325fGO:0003674 molecular\_function  
 Rtn2p ReticularGO:00717fGO:00325fGO:0003674 molecular\_function  
 None None None None None None  
 glutamateNAD(+)-deGO:00970fGO:00057fGO:00160f(sce00910)Nitrogen metabolism; (sce00250)Ala  
 hypothetiPutative GO:00081fGO:00055fGO:0003674 molecular\_function  
 guanine rGuanyl-mGO:00068fGO:00059fGO:0070273 phosphatidylinositol-4-phosphate binding;G  
 DNA helicDNA helicGO:00719fGO:00435fGO:0043141 ATP-dependent 5'-3' DNA helicase activity;  
 Rim4p Putative GO:00062fGO:00166(GO:0003723 RNA binding;GO:0003676 nucleic acid bindin  
 Spo74p ComponentGO:00304fGO:00359fGO:0005198 structural molecule activity;GO:0003674 mo  
 Spnlp Protein iGO:20012fGO:00056fGO:0000993 RNA polymerase II complex binding;GO:00431  
 hypothetiPutative GO:19905fGO:00057fGO:0089721 phosphoenolpyruvate transmembrane transpor  
 trifunctiMitochondGO:00092fGO:00057fGO:00044f(sce)Cl-unit interconversion, eukaryotes; (M  
 hypothetiDubious cGO:00081fGO:00055fGO:0003674 molecular\_function  
 Coalp MitochondGO:00336fGO:00313(GO:0003674 molecular\_function  
 DNA repaiSubunit cGO:00711fGO:00309fGO:0019789 SUMO transferase activity;GO:0003684 damag  
 None None None None None None  
 Ytmlp ConstitueGO:00422fGO:00705fGO:0003674 molecular\_function  
 D-arabincD-ArabincGO:00704fGO:00313(GO:0003885 D-arabinono-1,4-lactone oxidase activity;G  
 None None None None None None  
 ubiquitirUbiquitirGO:00106fGO:00057fGO:0004843 thiol-dependent ubiquitin-specific proteas  
 U2 snRNP Protein rGO:00002fGO:00056fGO:00037f(sce03040)Spliceosome



omega-claOmega clGO:000674GO:000575GO:0004364 glutathione transferase activity;GO:001676  
 Atg29p AutophagyGO:003445GO:199031GO:000014(sce04138)Autophagy - yeast  
 Set4p Protein cGO:000635GO:000557GO:0046872 metal ion binding;GO:0043169 cation bindin  
 DNA-directRNA polynGO:004275GO:000566GO:000396(sce03020)RNA polymerase; (sce00240)Pyrimidin  
 Trm2p tRNA metlGO:003045GO:000557GO:0030697 S-adenosylmethionine-dependent tRNA (m5U54  
 Dap2p DipeptidylGO:001645GO:000032GO:000825(Human)(hsa04974)Protein digestion and absorp  
 Opylp Protein cGO:190264GO:000575GO:0005546 phosphatidylinositol-4,5-bisphosphate bind  
 Erp2p Member ofGO:000665GO:003015GO:0003674 molecular\_function  
 Ptmlp Protein cGO:000815GO:00319(GO:0003674 molecular\_function  
 protein lProtein lGO:007235GO:000565GO:0072354 histone kinase activity (H3-T3 specific);G  
 F1FO ATP Subunit lGO:003361GO:000027GO:004695(sce00190)Oxidative phosphorylation; (sce0110  
 None None None None None None  
 Mid2p O-glycosylGO:000075GO:004335GO:000485(sce04011)MAPK signaling pathway - yeast  
 Sps18p Protein cGO:003201GO:000015GO:0005096 GTPase activator activity;GO:0030695 GTPas  
 hypothetiPutative GO:000641GO:000565GO:0003674 molecular\_function  
 Acf4p Protein cGO:000815GO:000557GO:0003674 molecular\_function  
 Ochlp MannosylGO:000645GO:000015GO:003316(sce)N-glycan biosynthesis, high-mannose typ  
 Axllp Haploid sGO:007145GO:004335GO:0004222 metalloendopeptidase activity;GO:0008237 m  
 putative Putative GO:000635GO:000565GO:0000981 DNA-binding transcription factor activity,  
 protein lPutative GO:00300(GO:000565GO:0004674 protein serine/threonine kinase activity;G  
 chromatinDNA damagGO:003155GO:000075GO:004235(sce04111)Cell cycle - yeast; (sce04113)Meio  
 Crt10p Protein iGO:000635GO:000557GO:0003674 molecular\_function  
 Yrrlp Zn2-Cys6 GO:004361GO:000565GO:0000978 RNA polymerase II proximal promoter sequen  
 Ypdlp Osmotic sGO:000725GO:000565GO:000995(sce04011)MAPK signaling pathway - yeast  
 deubiquitSubunit cGO:004585GO:004665GO:0004402 histone acetyltransferase activity;GO:0061  
 Snllp Ribosome-GO:000695GO:003195GO:004305(sce04141)Protein processing in endoplasmic r  
 rRNA-procEndonucleGO:000047GO:003065GO:000455(sce03008)Ribosome biogenesis in eukaryotes  
 telomerasEssentialGO:000045GO:000575GO:0010521 telomerase inhibitor activity;GO:0004857 e  
 Swc4p ComponentGO:004395GO:003526GO:0003714 transcription corepressor activity;GO:0003  
 Dsllp PeripherGO:000705GO:199045GO:0003674 molecular\_function  
 putative NucleolarGO:000005GO:003065GO:0004004 ATP-dependent RNA helicase activity;GO:000  
 sphinganiDihydrosgGO:004685GO:000575GO:004235(sce00600)Sphingolipid metabolism  
 ssDNA encEndonucleGO:003125GO:003085GO:0000014 single-stranded DNA endodeoxyribonuclease  
 None None None None None None  
 signal peSubunit cGO:000645GO:000575GO:000825(sce03060)Protein export  
 mitochondrMitochondGO:003255GO:000575GO:0003735 structural constituent of ribosome;GO:0005  
 serine/thlProtein lGO:005125GO:000581GO:000465(sce04392)Hippo signaling pathway -multiple  
 Soklp Protein cGO:001995GO:000565GO:0003674 molecular\_function  
 cationic Putative GO:003445GO:007165GO:0015174 basic amino acid transmembrane transporter  
 Gzf3p GATA zincGO:009025GO:000565GO:0000978 RNA polymerase II proximal promoter sequen  
 hypothetiProtein cGO:000705GO:000575GO:0003674 molecular\_function  
 phosphoriPutative GO:003445GO:000575GO:1990838 poly(U)-specific exoribonuclease activity,  
 hypothetiPutative GO:000815GO:000565GO:0003674 molecular\_function  
 ribonucleSubunit cGO:003495GO:000565GO:000455(sce03008)Ribosome biogenesis in eukaryotes;  
 Cwplp Cell wallGO:003215GO:007155GO:0005199 structural constituent of cell wall;GO:000  
 putative ATP-deperGO:199025GO:003565GO:0033682 ATP-dependent 5'-3' DNA/RNA helicase activ  
 Vps7lp NucleosonGO:003105GO:000081GO:0031491 nucleosome binding;GO:0042826 histone deac  
 Pet117p Protein rGO:003245GO:009961GO:0003674 molecular\_function  
 Sdh6p MitochondGO:003455GO:000575GO:0003674 molecular\_function  
 rRNA-procComponentGO:00064(GO:003445GO:000375(sce03008)Ribosome biogenesis in eukaryotes  
 putative Non-esserGO:007155GO:000575GO:0016887 ATPase activity;GO:0017111 nucleoside-trip  
 Apl2p Beta-adarGO:000685GO:003015GO:0030276 clathrin binding;GO:0005515 protein bindin  
 Tao3p ComponentGO:000711GO:004335GO:0003674 molecular\_function  
 Cmc1p Copper-biGO:003361GO:003131GO:0005507 copper ion binding;GO:0046914 transition m

Swi3p Subunit cGO:00314fGO:00165fGO:0015616 DNA translocase activity;GO:0008094 DNA-de

Atg7p AutophagyGO:00448fGO:00004fGO:00197f(sce04136)Autophagy - other; (sce04138)Autoph

methylin2-methylGO:00196fGO:00057fGO:00464f(M00012)Glyoxylate cycle; (sce)Glyoxylate cy

Lsm1p Lsm (LikeGO:00002fGO:19907fGO:00003f(sce03018)RNA degradation

septin CComponentGO:00009fGO:00056fGO:00103f(Human) (hsa04215)Apoptosis - multiple specie

transcripTranscripGO:00719fGO:00309fGO:00012f(sce04111)Cell cycle - yeast

tyrosine/Dual-specGO:00109fGO:00056fGO:00170f(sce04011)MAPK signaling pathway - yeast

Nce102p Protein cGO:00610fGO:00702fGO:0003674 molecular\_function

galactoseDNA-bindGO:00004fGO:00056fGO:0001085 RNA polymerase II transcription factor bin

Kar3p Minus-encGO:00007fGO:00058fGO:0008569 ATP-dependent microtubule motor activity, i

None None None None None None

U5 snRNP ComponentGO:00002fGO:00056fGO:0003674 molecular\_function

ribosomalRibosomalGO:00422fGO:00306fGO:00037f(sce03010)Ribosome

metallo-cPutative GO:00081fGO:00057fGO:0003876 AMP deaminase activity;GO:0047623 adenosin

mitogen-cMitogen-cGO:00715fGO:00425fGO:00047f(sce04933)AGE-RAGE signaling pathway in diabi

superoxideMitochondGO:00013fGO:00057fGO:00047f(sce04213)Longevity regulating pathway - mul

Rba50p Protein iGO:00063fGO:00057fGO:0003674 molecular\_function

Mtr2p mRNA trarGO:00000fGO:00422fGO:00085f(sce03015)mRNA surveillance pathway; (sce0301

putative N-formylGO:00304fGO:00055fGO:00044f(sce00380)Tryptophan metabolism; (sce00071)F

adrenodoxinFerrodoxiGO:00067fGO:00057fGO:0016653 oxidoreductase activity, acting on NAD(P)H

Okp1p Outer kirGO:00086fGO:00008fGO:0003674 molecular\_function

Nnf2p Protein tGO:00081fGO:00057fGO:0003674 molecular\_function

Cup2p Copper-biGO:00068fGO:00056fGO:0005507 copper ion binding;GO:0000978 RNA polymera

Atg2p PeripheracGO:00617fGO:00619fGO:00322f(sce04136)Autophagy - other; (sce04138)Autoph

putative Vacuolar GO:00109fGO:19908fGO:0015095 magnesium ion transmembrane transporter ac

ER oxidoreThiol oxiGO:00349fGO:00057fGO:00169f(Human) (hsa05110)Vibrio cholerae infection;

mitochondMitochondGO:00325fGO:00057fGO:0008168 methyltransferase activity;GO:0016741 tran

putative Probable GO:00701fGO:00057fGO:00048f(sce00970)Aminoacyl-tRNA biosynthesis

hypothetiZinc-clusGO:00063fGO:00056fGO:0000981 DNA-binding transcription factor activity,

Ucc1p F-box prcGO:00714fGO:00190fGO:0030674 protein binding, bridging;GO:0004842 ubiqu

None None None None None None

Skp6p Integral GO:19024fGO:00059fGO:0003674 molecular\_function

Rmr1p Protein rGO:00063fGO:00056fGO:0003674 molecular\_function

F1F0 ATP Beta subGO:00159fGO:00057fGO:00469f(sce00190)Oxidative phosphorylation; (sce0110

adenine pAdenine pGO:00442fGO:00056fGO:00020f(sce00230)Purine metabolism; (sce01100)Metabo

GTPase-acRab escorGO:00183fGO:00059fGO:0004663 Rab geranylgeranyltransferase activity;GO:0

trehaloseRegulatorGO:00704fGO:00059fGO:00038f(sce00500)Starch and sucrose metabolism; (sce

aldo-ketPutative GO:00060fGO:00055fGO:0018456 aryl-alcohol dehydrogenase (NAD+) activity

Com2p TranscripGO:00081fGO:00056fGO:0043565 sequence-specific DNA binding;GO:0003677 D

Tos4p Putative GO:00069fGO:00702fGO:0003682 chromatin binding;GO:0005488 binding;GO:00

hypothetiNovel sulGO:00067fGO:00716fGO:0003674 molecular\_function

hypothetiPutative GO:00081fGO:00058fGO:0003674 molecular\_function

putative Putative GO:00064fGO:00056fGO:0016746 transferase activity, transferring acyl gr

hypothetiPutative GO:00081fGO:00055fGO:0003674 molecular\_function

Cox11p Protein rGO:00090fGO:00057fGO:00055f(sce00190)Oxidative phosphorylation; (sce0110

Tmclp AN1-type GO:00712fGO:00056fGO:0008270 zinc ion binding;GO:0046914 transition met

Nop13p NucleolarGO:00422fGO:00306fGO:0019843 rRNA binding;GO:0003723 RNA binding;GO:000

Bcd1p EssentialGO:00004fGO:00707fGO:0046872 metal ion binding;GO:0043169 cation bindin

phosphomPhosphomGO:00092fGO:00104fGO:00046f(sce00051)Fructose and mannose metabolism; (

translatiAlpha sulGO:19038fGO:00320fGO:00037f(sce03013)RNA transport

Ndj1p Protein tGO:20007fGO:00359fGO:0042162 telomeric DNA binding;GO:0043565 sequence-

B-type cyB-type cyGO:00062fGO:00003fGO:00165f(sce04011)MAPK signaling pathway - yeast; (s

Mic60p ComponentGO:00450fGO:00616fGO:0003674 molecular\_function

Kap104p TransportGO:00066fGO:00059fGO:0008139 nuclear localization sequence binding;GO:0

transcripTranscripGO:000045GO:00166GO:0001102 RNA polymerase II activating transcription  
Dal80p Negative GO:009025GO:000565GO:0000978 RNA polymerase II proximal promoter sequen  
None None None None None None  
hypothetiCytoplasmGO:000815GO:000575GO:0003674 molecular\_function  
translatiMitochondGO:007015GO:000575GO:0003746 translation elongation factor activity;GO:  
copper meCytosolicGO:000687GO:000582GO:0016531 copper chaperone activity;GO:0016530 metal  
Hri1p Protein of unknownGO:000582GO:0003674 molecular\_function  
transcripTranscripGO:001084GO:00309GO:000371(sce04011)MAPK signaling pathway - yeast; (s  
diphthamiMethylestGO:001715GO:000575GO:0061685 diphthine methylesterase activity;GO:00526  
Nop53p NucleolarGO:000005GO:000575GO:000805 (Human) (hsa05168)Herpes simplex infection  
hypothetiPutative GO:000815GO:000575GO:0003674 molecular\_function  
Met4p Leucine-zGO:001934GO:008971GO:0003713 transcription coactivator activity;GO:0003  
Yap1801p Protein cGO:004825GO:003047GO:0005545 1-phosphatidylinositol binding;GO:0032050  
hypothetiPutative GO:000815GO:000575GO:0003674 molecular\_function  
histone IHistone vGO:007045GO:000075GO:004695 (Human) (hsa05322)Systemic lupus erythematosu  
None None None None None None  
Syh1p Protein cGO:003105GO:000095GO:0043022 ribosome binding;GO:0043021 ribonucleoprot  
Pan3p EssentialGO:00106GO:003125GO:000455 (sce03018)RNA degradation  
Ipilp ComponentGO:000625GO:007135GO:0003682 chromatin binding;GO:0005488 binding;GO:00  
DNA-deperProtein iGO:00012GO:000565GO:000805 (sce03420)Nucleotide excision repair  
Slolp Protein iGO:000685GO:000565GO:0003674 molecular\_function  
hypothetiPutative GO:000815GO:000575GO:0003674 molecular\_function  
phosphoryEnolase, GO:000605GO:000001GO:000465 (M00002)Glycolysis, core module involving th  
Ste50p Adaptor iGO:000075GO:000575GO:003205 (sce04011)MAPK signaling pathway - yeast  
E2 ubiquiUbiquitinGO:003045GO:000085GO:006165 (sce04120)Ubiquitin mediated proteolysis; (s  
Bx1p Protein iGO:00309GO:000035GO:0003674 molecular\_function  
3-oxoacylMitochondGO:000665GO:000575GO:000431(sce)Fatty acid biosynthesis, elongation; (M  
oxidativeFe(II)/2-GO:003551GO:000565GO:0035516 oxidative DNA demethylase activity;GO:0035  
Svslp Cell wallGO:000815GO:000927GO:0003674 molecular\_function  
sulfate iHigh affiGO:190235GO:000585GO:0008271 secondary active sulfate transmembrane tra  
Smp1p MADS-box GO:006135GO:000565GO:000830 (sce04011)MAPK signaling pathway - yeast  
lysophosSerine esGO:003465GO:000575GO:000465 (sce00564)Glycerophospholipid metabolism  
Y' elemerHelicase GO:000075GO:000575GO:0003678 DNA helicase activity;GO:0004386 helicase  
cytochronSubunit lGO:000615GO:000575GO:001545 (sce00190)Oxidative phosphorylation; (sce011  
DNA repliSubunit cGO:000075GO:007115GO:0043138 3'-5' DNA helicase activity;GO:0003678 DNA  
S-methyl-MethylthiGO:00195GO:000585GO:001705 (sce)Methionine salvage pathway; (M00034)Met  
Pep7p Adaptor iGO:000001GO:00100GO:003225 (sce04144)Endocytosis  
Seg2p Eisosome GO:000815GO:000585GO:0003674 molecular\_function  
Puf4p Member ofGO:00013GO:000575GO:0003729 mRNA binding;GO:0003723 RNA binding;GO:000  
Age2p ADP-ribosGO:000685GO:003015GO:000505 (sce04144)Endocytosis  
None None None None None None  
glutamineComponentGO:000675GO:006165GO:0036374 glutathione hydrolase activity;GO:0016805  
Med11p Subunit cGO:005115GO:007084GO:0001097 TFIIH-class transcription factor complex b  
Mgelp MitochondGO:003015GO:00014GO:0000774 adenylnucleotide exchange factor activity  
acetyl-CcAcetyl-CcGO:200125GO:000575GO:000395 (sce)Fatty acid biosynthesis, initiation; (M  
None None None None None None  
Mgm101p Protein vGO:000075GO:000025GO:0003697 single-stranded DNA binding;GO:0003677 DNA  
hexose trHexose trGO:001575GO:000585GO:001555 (sce04113)Meiosis - yeast  
hypothetiPutative GO:000815GO:000035GO:0003674 molecular\_function  
snoRNA-biNucleolarGO:004594GO:003445 (Human)G(sce03008)Ribosome biogenesis in eukaryotes  
putative Putative GO:001604GO:000575GO:0016298 lipase activity;GO:0016788 hydrolase activ  
Rrp17p ComponentGO:00070GO:000575GO:0019843 rRNA binding;GO:0003697 single-stranded DN  
Spr2p Putative GO:000815GO:000927GO:0003674 molecular\_function  
ATP-deperRecQ famiGO:190325GO:003145GO:004315 (sce03440)Homologous recombination

sorting rNexin-1 lGO:00450fGO:00309(GO:00322f(sce04144)Endocytosis  
 Clg1p Cyclin-liGO:00162fGO:00003(GO:0016538 cyclin-dependent protein serine/threonine  
 None None None None None None  
 mitochondrMitochoncGO:00325fGO:00057fGO:0003735 structural constituent of ribosome;GO:0005  
 nucleosonNucleosonGO:00350fGO:00007fGO:0042393 histone binding;GO:0005515 protein binding  
 Hlr1p Protein iGO:00315(GO:00057fGO:0003674 molecular\_function  
 hypothetiPutative GO:00081fGO:00056fGO:0003674 molecular\_function  
 Rad17p CheckpoirGO:00071fGO:00308fGO:00036f(sce04111)Cell cycle - yeast; (sce04113)Meio:  
 Tpo4p PolyamineGO:190371GO:00003fGO:0015606 spermidine transmembrane transporter activ  
 Arr2p Arsenate GO:00466fGO:00056fGO:0030611 arsenate reductase activity;GO:0004725 pro  
 Rab familRab GTPasGO:00483(GO:00059fGO:0003924 GTPase activity;GO:0005525 GTP binding;GO:  
 protein rProtein iGO:00066fGO:00301fGO:0003674 molecular\_function  
 Sps19p PeroxisonGO:00304fGO:00057fGO:00086f(sce04146)Peroxisome  
 hypothetiPutative GO:00081fGO:00312fGO:0003674 molecular\_function  
 Tma23p NucleolarGO:00422fGO:00058fGO:0043022 ribosome binding;GO:0043021 ribonucleoprot  
 Irc8p Bud tip lGO:00063lGO:00059fGO:0003674 molecular\_function  
 peptidylrPeptidyl-GO:00436fGO:00001fGO:00081f(Human) (hsa04931)Insulin resistance  
 B-type cyB-type cyGO:00106fGO:00003(GO:00165f(sce04011)MAPK signaling pathway - yeast; (s  
 25S rRNA MethyltrGO:00704fGO:00056fGO:0070042 rRNA (uridine-N3-)-methyltransferase activ  
 hypothetiPutative GO:00081fGO:00055fGO:0003674 molecular\_function  
 Golgi trEssentialGO:00003(GO:00171lGO:0003674 molecular\_function  
 serine/tlRegulatorGO:00712fGO:01200fGO:00198f(sce04136)Autophagy - other; (sce04138)Autopl  
 hypothetiPutative GO:00081fGO:00055fGO:0003674 molecular\_function  
 transcripTFIIA larGO:00511fGO:00056fGO:00170f(sce03022)Basal transcription factors  
 Bre4p Zinc fingGO:00068fGO:00719fGO:0003674 molecular\_function  
 olichyl-cSubunit cGO:00064fGO:00057fGO:00045f(M00072)N-glycosylation by oligosaccharyltra  
 imidazoleImidazoleGO:00001(GO:00055fGO:00044f(sce)Histidine biosynthesis, PRPP => histidin  
 pheromonePheromoneGO:00007fGO:00160fGO:0003674 molecular\_function  
 mitochondrMitochoncGO:00325fGO:00057fGO:0003735 structural constituent of ribosome;GO:0005  
 Tda7p Cell cyclGO:00081fGO:00003fGO:0003674 molecular\_function  
 Tda2p Protein cGO:00308fGO:00304fGO:0051015 actin filament binding;GO:0003779 actin bi  
 ribosomalRibosomalGO:00004fGO:00306fGO:00198f(sce03010)Ribosome  
 Skglp TransmemlGO:00315(GO:00331(GO:0003674 molecular\_function  
 hypothetiPutative GO:00081fGO:00055fGO:0003674 molecular\_function  
 hypothetiPutative GO:00081fGO:00057fGO:0003674 molecular\_function  
 GPI-anchcSubunit cGO:00162fGO:00427fGO:00039f(sce00563)Glycosylphosphatidylinositol (GPI)-  
 hypothetiPutative GO:00081fGO:00056fGO:0046872 metal ion binding;GO:0043169 cation bindin  
 Yrb2p Protein cGO:00000fGO:00056fGO:0008536 Ran GTPase binding;GO:0005096 GTPase activ  
 Cnl1p Subunit cGO:00070fGO:00310fGO:0003674 molecular\_function  
 ESCRT-0 cSubunit cGO:19046fGO:00335fGO:00431f(sce04144)Endocytosis  
 COPII suComponentGO:00901lGO:00301fGO:00050f(sce04141)Protein processing in endoplasmic :  
 tRNA dihydDihydrouGO:00029fGO:00343fGO:0102265 tRNA-dihydrouridine47 synthase activity;GO  
 proteasonBeta 6 suGO:00104fGO:00345lGO:00042f(sce03050)Proteasome  
 None None None None None None  
 dolichyl-Delta suGO:00064fGO:00082fGO:00045f(M00072)N-glycosylation by oligosaccharyltra  
 F1FO ATP Subunit cGO:00159fGO:00002fGO:00469f(sce00190)Oxidative phosphorylation  
 glutathicProton:glGO:00347fGO:00057fGO:0015343 siderophore transmembrane transporter acti  
 Epolp Protein iGO:00611fGO:00059fGO:0003674 molecular\_function  
 putative Putative GO:00158fGO:00057fGO:0015230 FAD transmembrane transporter activity;GO:  
 Kre1p Cell wallGO:00315(GO:00092fGO:0005199 structural constituent of cell wall;GO:000  
 putative Protein vGO:00092fGO:00055fGO:0050334 thiaminase activity;GO:0008972 phosphometh  
 alcohol cAlcohol cGO:00009fGO:00057fGO:00040f(sce00350)Tyrosine metabolism; (sce00071)Fat  
 tRNA-spectRNA-specGO:00064(GO:00056fGO:0043829 tRNA-specific adenosine-37 deaminase activ  
 D-xylulosXylitol cGO:00195fGO:00055fGO:00465f(sce00040)Pentose and glucuronate interconve

copper mCopper mG0:00156G0:00057G0:00165 (sce00190)Oxidative phosphorylation; (sce0111  
Per33p Protein tG0:00510G0:00056G0:0003674 molecular\_function  
phosphatiPhosphatiG0:00360G0:00707G0:0043813 phosphatidylinositol-3,5-bisphosphate 5-ph  
Lsb5p Protein iG0:00516G0:00304G0:0003674 molecular\_function  
Sqs1p Protein tG0:00510G0:00306G0:0003676 nucleic acid binding;G0:1901363 heterocycl  
Mcm10p EssentialG0:00304G0:00312G0:0003688 DNA replication origin binding;G0:0003697  
RNA helicPredominG0:00459G0:00057G0:0034459 ATP-dependent 3'-5' RNA helicase activity;  
Gsm1p Putative G0:00061G0:00056G0:0000981 DNA-binding transcription factor activity,  
putative PTEN homG0:00304G0:00057G0:0016314 phosphatidylinositol-3,4,5-trisphosphate 3  
Itt1p Protein tG0:00064G0:00001G0:0031624 ubiquitin conjugating enzyme binding;G0:00  
mitochondMitochondG0:00325G0:00057G0:00037 (sce03010)Ribosome  
proteasomNon-ATPaG0:00432G0:00345G0:00051 (sce03050)Proteasome  
transcripSpt4p/5p G0:20012(G0:00320G0:0001179 RNA polymerase I transcription factor bind  
alpha-1,(Subunit cG0:00000G0:00001G0:00000 (sce)N-glycan biosynthesis, high-mannose typ  
rRNA-bindProtein iG0:00000G0:00306G0:0019843 rRNA binding;G0:0003723 RNA binding;G0:000  
hypothetiMitochondG0:00325G0:00057G0:0003735 structural constituent of ribosome;G0:0005  
proteasomAlpha 3 sG0:00801G0:00345G0:00042 (sce03050)Proteasome  
chromatirSwi2/Snf2G0:00434G0:00008G0:0004386 helicase activity;G0:0042393 histone bindi  
Ady2p Acetate tG0:00068G0:00057G0:0015123 acetate transmembrane transporter activity  
AAA familAAA ATPaG0:00482G0:00433G0:00703 (sce04138)Autophagy - yeast  
Tip20p PeripheraG0:19025(G0:00709G0:0005515 protein binding;G0:0005488 binding;G0:0003  
enoyl-CoEssentialG0:00304G0:00003G0:01021 (sce)Fatty acid biosynthesis, elongation, en  
Sdd4p Putative G0:00063G0:00056G0:0008270 zinc ion binding;G0:0043565 sequence-speci  
Yap1802p Protein cG0:00482G0:00304G0:0005545 1-phosphatidylinositol binding;G0:0032050  
End3p EH domainG0:00071G0:00304G0:0030674 protein binding, bridging;G0:0003779 actin  
translatiTranslatiG0:00340G0:00162G0:00037 (sce03013)RNA transport  
putative Putative G0:00065G0:00057G0:0004066 asparagine synthase (glutamine-hydrolyzing  
serine/thProtein lG0:00304G0:00057G0:00046 (sce04113)Meiosis - yeast  
Sap155p Protein rG0:00000G0:0005737 cytoplasm;G0:0005622 intracellular;G0:0044424 intra  
Pea2p Coiled-coG0:00313G0:0000133 polarisome;G0:0005934 cellular bud tip;G0:0043332 m  
chitin syChitin syG0:00009G0:00304G0:00041 (sce00520)Amino sugar and nucleotide sugar m  
lysophosLysophosG0:00359G0:00057G0:0003841 1-acylglycerol-3-phosphate 0-acyltransfera  
ribosomalProtein cG0:00021G0:00104G0:00037 (sce03010)Ribosome  
Nat4p N alpha-G0:00611G0:00056G0:0043998 H2A histone acetyltransferase activity;G0:  
E3 ubiquiUbiquitirG0:00309G0:00008G0:00616 (sce04120)Ubiquitin mediated proteolysis; (s  
Erclp Member oG0:00065G0:00160G0:0015297 antiporter activity;G0:0015238 drug transm  
hypothetiPutative G0:00457G0:00346G0:0003674 molecular\_function  
serine/thCell-cyclG0:00484G0:00056G0:00046 (sce04111)Cell cycle - yeast  
Nup170p Subunit cG0:00708G0:00446G0:19908 (sce03013)RNA transport  
U2-type sSpliceoscG0:00003G0:00710(G0:0003723 RNA binding;G0:0003676 nucleic acid bindin  
Pho2p Homeobox G0:00001(G0:00058G0:00009 (sce04111)Cell cycle - yeast  
Vps51p ComponentG0:00071G0:00100(G0:0005515 protein binding;G0:0005488 binding;G0:0003  
ribosome-Protein iG0:00000G0:00306G0:00430 (sce03008)Ribosome biogenesis in eukaryotes;  
Tco89p Subunit cG0:00060G0:00003(G0:0003674 molecular\_function  
epsin Epsin-likG0:00001G0:00059G0:00431 (sce04144)Endocytosis  
Sed4p Integral G0:00034(G0:00301G0:00050 (sce04141)Protein processing in endoplasmic  
SUMO famiUbiquitirG0:00169G0:00059G0:00313 (sce03013)RNA transport  
Rot1p MolecularG0:00071G0:00057G0:0051082 unfolded protein binding;G0:0005515 protei  
Edc3p Non-esserG0:19001G0:00009G0:00037 (sce03018)RNA degradation  
Vps54p ComponentG0:00304G0:00009G0:0019905 syntaxin binding;G0:0000149 SNARE binding;  
Fdolp Protein iG0:00075G0:00056G0:0003674 molecular\_function  
anthranilAnthranilG0:00001G0:00058G0:00040 (sce)Tryptophan biosynthesis, chorismate =>  
putative Putative G0:00510G0:00059G0:0008568 microtubule-severing ATPase activity;G0:00  
Srb4p Subunit cG0:00511G0:00708G0:0001139 RNA polymerase II complex recruiting activ

Srb7p Subunit cG0:00001fG0:00708fG0:0001103 RNA polymerase II repressing transcription  
 hypothetiProtein cG0:00081fG0:00358fG0:0003674 molecular\_function  
 phosphorCatalyticG0:19026fG0:00302fG0:00047f (Human) (hsa04922)Glucagon signaling pathway  
 1,3-beta-1,3-beta-G0:00719fG0:00092fG0:0042124 1,3-beta-glucanosyltransferase activity;G0:  
 phosphatiPhosphatiG0:00106fG0:00313(G0:00046f (M00093)Phosphatidylethanolamine (PE) biosyn  
 Rmelp Zinc fingG0:00360fG0:00056fG0:00009f (sce04113)Meiosis - yeast  
 hypothetiPutative G0:00081fG0:00003fG0:0003674 molecular\_function  
 Imp2' p TranscripG0:00004fG0:00057fG0:0003713 transcription coactivator activity;G0:0003  
 Utp20p ComponentG0:00004fG0:00306fG0:0003729 mRNA binding;G0:0003723 RNA binding;G0:000  
 hypothetiPutative G0:00081fG0:00055fG0:0003674 molecular\_function  
 snoRNA-biComponentG0:00422fG0:00344fG0:00430f (sce03008)Ribosome biogenesis in eukaryotes  
 putative Putative G0:00352fG0:00975fG0:00041f (sce00515)Mannose type O-glycan biosynthesis  
 SAGA histIntegral G0:00165fG0:00001fG0:0008047 enzyme activator activity;G0:0030234 enzym  
 replicatiSubunit cG0:00062fG0:00313fG0:00036f (sce03430)Mismatch repair; (sce03030)DNA rep  
 mitochondMitochondG0:00325fG0:00057fG0:0003735 structural constituent of ribosome;G0:0005  
 Srp40p NucleolarG0:00069fG0:00057fG0:0003674 molecular\_function  
 Cue4p Protein cG0:00081fG0:00057fG0:0003674 molecular\_function  
 aspartyl GPI-anchG0:00014(G0:00092fG0:00041f (sce04011)MAPK signaling pathway - yeast  
 Ecmlp Pre-ribosG0:00000fG0:00306fG0:0003674 molecular\_function  
 tRNA modiMitochondG0:00708fG0:00057fG0:0050660 flavin adenine dinucleotide binding;G0:005  
 None None None None None None  
 hypothetiPutative G0:00081fG0:00055fG0:0003674 molecular\_function  
 seripaupMember ofG0:00315(G0:00092fG0:0005199 structural constituent of cell wall;G0:000  
 FG-nucleFG-nucleG0:00319fG0:00446fG0:0017056 structural constituent of nuclear pore;G0:  
 Rim20p Protein iG0:00014(G0:00058fG0:00036f (sce04144)Endocytosis  
 ribosomalRibosomalG0:00021fG0:00226fG0:00037f (sce03010)Ribosome  
 Rsa4p WD-repeatG0:00000fG0:00058fG0:0043022 ribosome binding;G0:0043021 ribonucleoprot  
 Sntl p Subunit cG0:00328fG0:00349fG0:0042826 histone deacetylase binding;G0:0003714 tra  
 Isylp Member ofG0:00003fG0:00710fG0:00003f (sce03040)Spliceosome  
 Sqt1p Specific G0:00000fG0:00306fG0:0051082 unfolded protein binding;G0:0005515 protei  
 sphingoliVacuolar G0:00066fG0:00003fG0:00466f (Human) (hsa04142)Lysosome  
 Shel0p Protein iG0:00304fG0:00057fG0:0003674 molecular\_function  
 Smc5-Smc6ComponentG0:00169fG0:00309fG0:0019789 SUMO transferase activity;G0:0019787 ubiqu  
 sphinganiSphingoicG0:00468fG0:00325fG0:00084f (sce)Sphingosine degradation; (M00100)Sphingi  
 Nsr1p NucleolarG0:00000fG0:00056fG0:0043047 single-stranded telomeric DNA binding;G0:0  
 tetheringHistone IG0:00362(G0:00332fG0:00306f (sce04138)Autophagy - yeast  
 bifuncticCholine lG0:00066fG0:00057fG0:00043f (sce)Phosphatidylcholine (PC) biosynthesis, c  
 sphinganiDihydrospG0:00301fG0:00325fG0:00081f (sce)Sphingosine degradation; (M00100)Sphingi  
 Mrnlp RNA-bindig0:00003fG0:00104fG0:0003729 mRNA binding;G0:0003723 RNA binding;G0:000  
 SUMO-tarSubunit cG0:00169fG0:00337fG0:0032183 SUMO binding;G0:0032182 ubiquitin-like pro  
 S-adenosS-AdoMet-G0:00550fG0:00057fG0:0008757 S-adenosylmethionine-dependent methyltrans  
 Fe(2+) tiIron trarG0:00482fG0:00057fG0:0005381 iron ion transmembrane transporter activit  
 hypothetiPutative G0:00081fG0:00055fG0:00036f (Human) (hsa00053)Ascorbate and aldarate metal  
 tRNA methProtein iG0:00304fG0:00058fG0:0003674 molecular\_function  
 Tip41p Protein tG0:00319fG0:00058fG0:00036f (sce04138)Autophagy - yeast  
 hypothetiUncharactG0:00081fG0:00003fG0:0003674 molecular\_function  
 hypothetiPutative protein of unknown function; the authentic, non-tagged protein is detec  
 hypothetiPutative G0:00081fG0:00003fG0:0003674 molecular\_function  
 Fyv6p Protein cG0:00063(G0:00007fG0:0003674 molecular\_function  
 Ymd8p Putative G0:00157fG0:00306fG0:0005338 nucleotide-sugar transmembrane transporter  
 tRNA (guaNoncatalyG0:01060(G0:01061fG0:0008176 tRNA (guanine-N7-)-methyltransferase activ  
 putative Putative G0:00551fG0:00056fG0:0016726 oxidoreductase activity, acting on CH or C  
 MIND comEssentialG0:00000fG0:00008fG0:0003674 molecular\_function  
 Arp10p ComponentG0:00002fG0:00058fG0:0003774 motor activity;G0:0005200 structural const

Bag7p Rho GTPase GO:003502 GO:000557 GO:0005096 GTPase activator activity; GO:0030695 GTPase  
 Fet4p Low-affinity GO:001567 GO:000032 GO:0005375 copper ion transmembrane transporter activ  
 hypothetiPutative GO:000815 GO:000557 GO:0003674 molecular\_function  
 elongin (Elongin (GO:007091 GO:000011 GO:000484 (sce04120) Ubiquitin mediated proteolysis  
 Rri2p Subunit c GO:000075 GO:000815 GO:0003674 molecular\_function  
 Rrg8p Protein c GO:000000 GO:000575 GO:0003674 molecular\_function  
 Mim2p Mitochondrion GO:004504 GO:003130 GO:0003674 molecular\_function  
 hypothetiProtein c GO:000815 GO:000584 GO:0043022 ribosome binding; GO:0043021 ribonucleoprotei  
 Aim25p Mitochondrion GO:190314 GO:000575 GO:0017128 phospholipid scramblase activity; GO:000554  
 Rrn7p Component GO:000115 GO:000566 GO:0001164 RNA polymerase I CORE element sequence-spe  
 glycogeniGlycogeni GO:000597 GO:000557 GO:000846 (sce00500) Starch and sucrose metabolism; (sce  
 DNA ligase DNA ligase GO:190346 GO:000565 GO:000391 (sce03410) Base excision repair; (sce03430) Mi  
 hypothetiPutative GO:000815 GO:000557 GO:0003674 molecular\_function  
 Bsc2p Protein c GO:000815 GO:000581 GO:0003674 molecular\_function  
 ribosomalRibosomal GO:000215 GO:003068 GO:000375 (sce03010) Ribosome  
 Cbr1p Cytochrome GO:005511 GO:000574 GO:000412 (sce00520) Amino sugar and nucleotide sugar m  
 F-actin-cBeta subunit GO:005101 GO:000829 GO:005101 (sce04144) Endocytosis  
 chromatinTranscription GO:003506 GO:004669 GO:0004402 histone acetyltransferase activity; GO:0061  
 peptidylPeptidyl GO:000041 GO:000582 GO:0016018 cyclosporin A binding; GO:0003755 peptidyl-  
 Pex32p Peroxisome GO:000705 GO:000577 GO:0003674 molecular\_function  
 Sfk1p Plasma membrane GO:006105 GO:000576 GO:0003674 molecular\_function  
 dipeptidylDipeptidyl GO:000650 GO:000565 GO:0008239 dipeptidyl-peptidase activity; GO:0004177 a  
 Mmr1p Phosphorylation GO:004831 GO:000595 GO:0003674 molecular\_function  
 mitochondrionMitochondrion GO:003254 GO:000576 GO:0003735 structural constituent of ribosome; GO:0005  
 hypothetiDubious c GO:000815 GO:000557 GO:0003674 molecular\_function  
 Snx41p Sorting receptor GO:004214 GO:001000 GO:0032266 phosphatidylinositol-3-phosphate binding; G  
 protein cCytoplasm GO:004366 GO:000575 GO:0008157 protein phosphatase 1 binding; GO:0019888 p  
 Tvp15p Integral GO:001615 GO:003017 GO:0003674 molecular\_function  
 ubiquitinUbiquitin GO:000005 GO:002262 GO:003138 (sce03010) Ribosome  
 None None None None None None  
 Sly41p Protein i GO:199055 GO:000579 GO:0089721 phosphoenolpyruvate transmembrane transpor  
 hypothetiPutative GO:000815 GO:000579 GO:0003674 molecular\_function  
 None None None None None None  
 COPII subunitComponent GO:009011 GO:003012 GO:000504 (sce04141) Protein processing in endoplasmic r  
 anaphase Catalytic GO:004584 GO:000568 GO:009760 (sce04120) Ubiquitin mediated proteolysis; (s  
 phosphatiMembrane GO:000650 GO:000050 GO:001715 (sce00563) Glycosylphosphatidylinositol (GPI)-  
 hypothetiPutative GO:000815 GO:000557 GO:0003674 molecular\_function  
 Big1p Integral GO:000607 GO:003017 GO:0003674 molecular\_function  
 E2 ubiquitinPeroxisome GO:001656 GO:000577 GO:0061631 ubiquitin conjugating enzyme activity; GO:0  
 SAGA histoneSubunit c GO:000074 GO:004669 GO:0046982 protein heterodimerization activity; GO:000  
 Cmc4p Protein t GO:000815 GO:000575 GO:0003674 molecular\_function  
 histidineHistidine GO:000010 GO:000575 GO:000440 (sce) Histidine biosynthesis, PRPP => histidin  
 Mch1p Protein v GO:001571 GO:000032 GO:0008028 monocarboxylic acid transmembrane transpor  
 asparaginCytosolic GO:000655 GO:004259 GO:000406 (sce00460) Cyanoamino acid metabolism; (sce00  
 Hch1p Heat shock GO:003275 GO:000565 GO:0001671 ATPase activator activity; GO:0060590 ATPase  
 Pex28p Peroxisome GO:000705 GO:000577 GO:0003674 molecular\_function  
 chromatinComponent GO:000005 GO:000040 GO:0031490 chromatin DNA binding; GO:0003682 chromatin  
 ferric-chelateFerric reductase GO:001589 GO:000032 GO:0052851 ferric-chelate reductase (NADPH) activity;  
 protein kinaseProtein kinase GO:001810 GO:000565 GO:0004683 calmodulin-dependent protein kinase activi  
 Get4p Protein i GO:004504 GO:007181 GO:0003674 molecular\_function  
 glucan 1, Endo-beta-glucanase GO:003150 GO:000927 GO:000435 (sce00500) Starch and sucrose metabolism  
 dihydrofolateDihydrofolate GO:000676 GO:000575 GO:000884 (M00126) Tetrahydrofolate biosynthesis, GTP =>  
 FACT complexSubunit c GO:004589 GO:000565 GO:0031491 nucleosome binding; GO:0042393 histone bind  
 adenylateAdenylate GO:000617 GO:000578 GO:000401 (sce04213) Longevity regulating pathway - mul

Irc10p Protein cGO:00081fGO:00700fGO:0003674 molecular\_function

Ras familGTPase irGO:00457fGO:00058fGO:00039f(sce04933)AGE-RAGE signaling pathway in diab

putative Putative GO:00442fGO:00056fGO:0004849 uridine kinase activity;GO:0019206 nucleos

mismatch Mismatch GO:00431fGO:00323fGO:00004f(sce03430)Mismatch repair

amidophosPhosphoriGO:00061fGO:00057fGO:00040f(M00048)Inosine monophosphate biosynthesis, l

Ysc84p Actin-birGO:19000fGO:00304fGO:0051015 actin filament binding;GO:0035091 phosphat

Msa2p Putative GO:00000fGO:00056fGO:0003674 molecular\_function

None None None None None None

1-(5-phosEnzyme tlGO:00001fGO:00056fGO:00039f(sce)Histidine biosynthesis, PRPP => histidi

Pnt1p MitochondGO:00329fGO:00313fGO:0003674 molecular\_function

None None None None None None

ribosomalProtein cGO:00064fGO:00226fGO:00037f(sce03010)Ribosome

U2 snRNP ComponentGO:00002fGO:00056fGO:00036f(sce03040)Spliceosome

translatiTranslatiGO:00017fGO:00332fGO:00313f(sce03013)RNA transport

Lst4p Subunit cGO:19042fGO:19908fGO:0005096 GTPase activator activity;GO:0030695 GTPas

hypothetiProtein vGO:00066fGO:00723fGO:0003674 molecular\_function

Dit1p SporulatiGO:00304fGO:00055fGO:0003824 catalytic activity;GO:0003674 molecular\_fu

sulfite iSubunit eGO:00193fGO:00093fGO:00047f(M00176)Assimilatory sulfate reduction, sulfi

Nit1p NitrilaseGO:00068fGO:00055fGO:0000257 nitrilase activity;GO:0016815 hydrolase ac

Gal83p One of tlGO:20002fGO:00056fGO:0004679 AMP-activated protein kinase activity;GO:0

putative Member ofGO:00611fGO:00058fGO:0003730 mRNA 3'-UTR binding;GO:0003729 mRNA bindin

serine/thlProtein lGO:00164fGO:00056fGO:0004712 protein serine/threonine/tyrosine kinase a

Slz1p SporulatiGO:20002fGO:00363fGO:0005515 protein binding;GO:0005488 binding;GO:0003

hypothetiPutative GO:00081fGO:00056fGO:0003674 molecular\_function

telomere-Single stGO:00519fGO:19908fGO:0098505 G-rich strand telomeric DNA binding;GO:001

transcripTranscripGO:00710fGO:00343fGO:0070300 phosphatidic acid binding;GO:0003714 trans

endonucleEndonucleGO:00062fGO:00335fGO:0017108 5'-flap endonuclease activity;GO:0048256 f

fimbrin Fimbrin, GO:00706fGO:00304fGO:0030674 protein binding, bridging;GO:0051015 actin

cleavage Subunit cGO:00063fGO:00058fGO:00037f(sce03015)mRNA surveillance pathway

cystathicPutative GO:00193fGO:00055fGO:00039f(sce00450)Selenocompound metabolism; (sce009

Brr6p EssentialGO:00069fGO:00319fGO:0003674 molecular\_function

Poc4p ComponentGO:00511fGO:00056fGO:0003674 molecular\_function

Emp47p Integral GO:00070fGO:00301fGO:00055f(sce04141)Protein processing in endoplasmic :

Csclp Calcium fGO:00342fGO:00003fGO:0005227 calcium activated cation channel activity;G

lysine peLysine peGO:19038fGO:00321fGO:0015181 arginine transmembrane transporter activit

phosphatiPutative GO:00159fGO:00056fGO:0008526 phosphatidylinositol transporter activity;G

Ibd2p ComponentGO:00070fGO:00009fGO:0003674 molecular\_function

hypothetiPutative protein of unknown function; YMR130W is not an essential gene

hypothetiPutative GO:00081fGO:00160fGO:0003674 molecular\_function

hypothetiPutative GO:00081fGO:00160fGO:0003674 molecular\_function

Rad33p Protein iGO:00062fGO:00056fGO:0003674 molecular\_function

Srb5p Subunit cGO:00011fGO:00708fGO:0001135 RNA polymerase II transcription regulator :

alpha-1, fMannosylfGO:00064fGO:00003fGO:00000f(sce00514)Other types of O-glycan biosynthes

None None None None None None

Mrx7p Protein tGO:00081fGO:00057fGO:0003674 molecular\_function

Sec63 conNon-esserGO:00312fGO:00312fGO:0008565 protein transporter activity;GO:0005215 tr

Rim2lp pH sensorGO:00014fGO:00057fGO:0003674 molecular\_function

lysophosPhospholiGO:00066fGO:00003fGO:00046f(sce00564)Glycerophospholipid metabolism

hypothetiPutative GO:00081fGO:00160fGO:0003674 molecular\_function

phosphogHomolog cGO:00060fGO:00057fGO:00046f(M00002)Glycolysis, core module involving th

hydroxyacMitochondGO:00066fGO:00057fGO:0019171 3-hydroxyacyl-[acyl-carrier-protein] dehyd

Nem1-Spo7Probable GO:19037fGO:00715fGO:0004721 phosphoprotein phosphatase activity;GO:001

translatiSubunit cGO:00483fGO:00104fGO:0003743 translation initiation factor activity;GO:0

translatiAlpha sufGO:00017fGO:00436fGO:00430f(sce04138)Autophagy - yeast; (sce04141)Prote



U4/U6-U5 Component GO:000048 GO:004654 GO:000367 (sce03040) Spliceosome  
cleavage Component GO:009878 GO:000584 GO:000552 (sce03015) mRNA surveillance pathway  
protein B-type re GO:003157 GO:000078 GO:007254 (sce03015) mRNA surveillance pathway; (sce041  
Sbp1p Protein GO:003208 GO:001049 GO:0031370 eukaryotic initiation factor 4G binding; GO  
None None None None None None  
Sdd3p Putative GO:000651 GO:000578 GO:0004222 metalloendopeptidase activity; GO:0008237 m  
Ras GTPase GO:007041 GO:000578 GO:0005096 GTPase activator activity; GO:0030695 GTPase  
actin-rel Essential GO:003431 GO:003047 GO:000377 (sce04138) Autophagy - yeast  
aromatic High affi GO:001582 GO:000578 GO:0005300 high-affinity tryptophan transmembrane tra  
cytosine Cytosine GO:004421 GO:000566 GO:010248 (sce00330) Arginine and proline metabolism; (s  
GTPase B GTPase re GO:000047 GO:003068 GO:003451 (sce03008) Ribosome biogenesis in eukaryotes  
DNA-direct RNA poly GO:000118 GO:000566 GO:000396 (sce03020) RNA polymerase; (sce00240) Pyrimidi  
type 1 pr Regulator GO:000708 GO:000018 GO:0004865 protein serine/threonine phosphatase inhib  
retromer Endosomal GO:004508 GO:003091 GO:000856 (sce04144) Endocytosis  
Yap3p Basic lei GO:000638 GO:000566 GO:0043565 sequence-specific DNA binding; GO:0003700 D  
Mak32p Protein re GO:004441 GO:000557 GO:0003674 molecular\_function  
S-adenosyl S-adenosyl GO:001928 GO:000566 GO:000889 (sce00270) Cysteine and methionine metabolism  
Rec104p Protein re GO:004218 GO:000078 GO:0003674 molecular\_function  
GPI-anchored GPI trans GO:001628 GO:004276 GO:000392 (sce00563) Glycosylphosphatidylinositol (GPI)-  
uridine Uridine/c GO:004421 GO:000566 GO:000484 (sce00240) Pyrimidine metabolism; (sce01100) M  
peroxisome Peroxisome GO:000708 GO:000578 GO:0003674 molecular\_function  
None None None None None None  
Mdj1p Co-chaperon GO:000651 GO:003131 GO:000167 (Human) (hsa05203) Viral carcinogenesis  
DNA-binding Basic lei GO:006138 GO:000566 GO:0043565 sequence-specific DNA binding; GO:0003700 D  
hypothetical Putative GO:000818 GO:001602 GO:0003674 molecular\_function  
hypothetical Putative GO:000818 GO:000557 GO:0003674 molecular\_function  
Fig1p Integral GO:003222 GO:004338 GO:0003674 molecular\_function  
bifunctional Bifunctional GO:001938 GO:000557 GO:004311 (sce00860) Porphyrin and chlorophyll metaboli  
Ypt35p Endosomal GO:000818 GO:001000 GO:0032266 phosphatidylinositol-3-phosphate binding; G  
putative Putative GO:005511 GO:000566 GO:005258 (sce00650) Butanoate metabolism  
Emilp Non-essential GO:003048 GO:000557 GO:0003674 molecular\_function  
inositol- Inositol- GO:000602 GO:000578 GO:000451 (sce00562) Inositol phosphate metabolism; (sce  
hypothetical Putative GO:000818 GO:000557 GO:0003674 molecular\_function  
Nop19p Ribosome GO:000047 GO:003068 GO:0003674 molecular\_function  
Far10p Protein re GO:000032 GO:000578 GO:0003674 molecular\_function  
Ngr1p RNA binding GO:006118 GO:001049 GO:1990446 U1 snRNP binding; GO:0070990 snRNP binding; (s  
protease Alpha 4 re GO:001048 GO:003451 GO:000429 (sce03050) Proteasome  
mitochondrial Mitochondrial GO:003254 GO:000578 GO:0003735 structural constituent of ribosome; GO:0005  
putative Phospholipase GO:005508 GO:000581 GO:0004622 lysophospholipase activity; GO:0004620 phos  
Bio5p Putative GO:000911 GO:000578 GO:0022857 transmembrane transporter activity; GO:0005  
guanine re Guanine re GO:000688 GO:000582 GO:0005085 guanyl-nucleotide exchange factor activity  
hypothetical Putative protein of unknown function; the authentic, non-tagged protein is detec  
chaperon Subunit re GO:000648 GO:000588 GO:0051082 unfolded protein binding; GO:0005524 ATP bi  
Ylh47p Mitochondrial GO:005121 GO:000578 GO:0043022 ribosome binding; GO:0043021 ribonucleoprote  
serine/threonine Palmitoyl GO:001028 GO:003196 GO:000467 (sce04392) Hippo signaling pathway -multiple  
hypothetical Cell wall GO:000818 GO:000927 GO:0003674 molecular\_function  
gamma-tubulin Gamma-tubulin GO:200078 GO:000092 GO:0005200 structural constituent of cytoskeleton; GO:0  
transcription TFIIE large GO:000111 GO:000566 GO:000109 (sce03022) Basal transcription factors  
Spt20p Subunit re GO:003648 GO:004669 GO:0003712 transcription coregulator activity; GO:0140  
mitochondrial Mitochondrial GO:003254 GO:000578 GO:0003735 structural constituent of ribosome; GO:0005  
Git1p Plasma membrane GO:000141 GO:000032 GO:0001406 glycerophosphodiester transmembrane transp  
Ggclp Mitochondrial GO:190378 GO:000578 GO:0001409 guanine nucleotide transmembrane transport  
Mbflp Transcription GO:004594 GO:000578 GO:0003713 transcription coactivator activity; GO:0003  
oxysterol Member of GO:003472 GO:003254 GO:0008142 oxysterol binding; GO:0043325 phosphatidyl

tRNA-5-t<sub>4</sub>tRNA-spec GO:19907 GO:00057 GO:0061708 tRNA-5-taurinomethyluridine 2-sulfurtransf  
FG-nuclec FG-nuclec GO:00000 GO:00446 GO:00081 (sce03013) RNA transport

Tbslp Protein GO:00063 GO:00319 GO:0000981 DNA-binding transcription factor activity,  
hypothetiDubious GO:00081 GO:00160 GO:0003674 molecular\_function

cytochronSubunit GO:00061 GO:00057 GO:00504 (sce00190) Oxidative phosphorylation; (sce011  
hypothetiPutative protein of unknown function; null mutant is viable

Anr2p Protein GO:00081 GO:00058 GO:0003674 molecular\_function

Hat2p Subunit GO:00063 GO:00001 GO:0004402 histone acetyltransferase activity; GO:0061  
chaperoniSubunit GO:00064 GO:00058 GO:0051082 unfolded protein binding; GO:0005524 ATP bi  
rRNA-bindProtein GO:00004 GO:00306 GO:00701 (sce03008) Ribosome biogenesis in eukaryotes

Scjlp One of sc GO:00304 GO:00057 GO:00510 (sce04141) Protein processing in endoplasmic  
Cdc40p Pre-mRNA GO:00003 GO:00710 GO:00003 (sce03040) Spliceosome

translatiTranslati GO:00021 GO:00184 GO:00037 (sce03015) mRNA surveillance pathway  
putative Essential GO:00004 GO:00306 GO:0004004 ATP-dependent RNA helicase activity; GO:000  
hypothetiDubious GO:00081 GO:00055 GO:0003674 molecular\_function

transcripComponent GO:00611 GO:00336 GO:00044 (sce04139) Mitophagy - yeast

mRNA spliConserve GO:00002 GO:00056 GO:00364 (sce03040) Spliceosome

hypothetiPutative GO:00081 GO:00160 GO:0003674 molecular\_function

ribosomalRibosomal GO:00021 GO:00226 GO:00037 (sce03010) Ribosome

Vps64p Protein GO:00003 GO:00057 GO:0003674 molecular\_function

SUMO ligSUMO E3 GO:19906 GO:00059 GO:00197 (sce04120) Ubiquitin mediated proteolysis

hypothetiPutative GO:00081 GO:00055 GO:0003674 molecular\_function

Spt2p Protein GO:00063 GO:00058 GO:0000217 DNA secondary structure binding; GO:0003677  
phosphatiPhospholi GO:00014 (GO:00007 GO:00044 (sce04933) AGE-RAGE signaling pathway in diab  
TFIIH conComponent GO:00062 GO:00056 GO:00009 (sce03022) Basal transcription factors; (sce0  
dihydrofcdDihydrofcd GO:00464 GO:00057 GO:00041 (sce) Tetrahydrofolate biosynthesis, GTP => TH  
glycogeniGlycogeni GO:00059 GO:00057 GO:00084 (sce00500) Starch and sucrose metabolism; (sce  
snoRNA-biNucleolar GO:00004 GO:00343 GO:00305 (sce03008) Ribosome biogenesis in eukaryotes

Cinlp Tubulin GO:00070 GO:00055 GO:0048487 beta-tubulin binding; GO:0005096 GTPase act

Lcl2p Putative GO:00304 GO:00003 GO:0003674 molecular\_function

Stslp Protein GO:19909 GO:00319 GO:1990919 nuclear membrane proteasome anchor; GO:0043  
adenylateMitochon GO:00469 GO:00057 GO:00468 (sce) Adenine ribonucleotide biosynthesis, IM  
medium-clMedium cl GO:00016 GO:00057 GO:01023 (sce) beta-Oxidation, acyl-CoA synthesis; (MO  
Atg4lp Protein GO:00322 GO:00340 GO:0003674 molecular\_function

Ras familGTP-bind GO:00315 GO:00058 GO:00039 (sce04111) Cell cycle - yeast

pyridoxalProtein GO:00428 GO:00056 GO:0004733 pyridoxamine-phosphate oxidase activity; GO  
mannose-ER membr GO:00065 (GO:00057 GO:00513 (sce) GPI-anchor biosynthesis, core oligosaccl  
hypothetiProtein GO:00081 GO:00055 GO:0003674 molecular\_function

6-phosph6-phosph GO:00090 GO:00056 GO:00170 (M00006) Pentose phosphate pathway, oxidative

Fyv7p Essential GO:00004 GO:00057 GO:0003674 molecular\_function

phosphatiPhosphati GO:19013 GO:00001 GO:0008526 phosphatidylinositol transporter activity;  
Rho familNon-esser GO:00903 GO:00001 GO:0003924 GTPase activity; GO:0005525 GTP binding; GO:  
ribosomalRibosomal GO:00021 GO:00226 GO:00037 (sce03010) Ribosome

hypothetiProtein GO:00081 GO:00055 GO:0003674 molecular\_function

kynurenirKynurenir GO:00343 GO:00057 GO:00045 (sce00380) Tryptophan metabolism; (sce01100) M  
Rho familGuanine r GO:00435 GO:01201 GO:00050 (sce04011) MAPK signaling pathway - yeast

ATP-bindVacuolar GO:00157 GO:00003 GO:00154 (Human) (hsa01523) Antifolate resistance; (hsa  
Mdm36p Mitochon GO:00483 GO:00057 GO:0003674 molecular\_function

Cos10p Endosomal GO:00433 GO:00056 GO:0003674 molecular\_function

phosphopProtein GO:00070 GO:00003 GO:0004721 phosphoprotein phosphatase activity; GO:001  
putative Lipase wi GO:00160 GO:00056 GO:0047372 acylglycerol lipase activity; GO:0016298 li  
hypothetiPutative GO:00081 GO:00055 GO:0003674 molecular\_function

serine/thSerine/th GO:00459 GO:00098 GO:0004674 protein serine/threonine kinase activity; G  
phosphopNegative GO:00159 GO:00715 GO:0004633 phosphopantothenoylecysteine decarboxylase

|            |            |                   |            |                                                     |                                               |
|------------|------------|-------------------|------------|-----------------------------------------------------|-----------------------------------------------|
| Fzflp      | Transcrip  | G0:006142         | G0:000565  | G0:0000978                                          | RNA polymerase II proximal promoter sequen    |
| chromatin  | Subunit c  | G0:004585         | G0:000565  | G0:0031491                                          | nucleosome binding;G0:0042393 histone bind    |
| TRAPP com  | Core comp  | G0:003225         | G0:199007  | G0:0017112                                          | Rab guanyl-nucleotide exchange factor acti    |
| Fcf2p      | Nucleolar  | G0:000047         | G0:000575  | G0:0003674                                          | molecular_function                            |
| DNA-direc  | rRNA polyn | G0:004275         | G0:000565  | G0:000396                                           | (sce03020)RNA polymerase; (sce00240)Pyrimidin |
| AAA famil  | AAA-perox  | G0:001655         | G0:000577  | G0:004262                                           | (sce04146)Peroxisome                          |
| purine-cy  | Putative   | G0:001585         | G0:000585  | G0:0015205                                          | nucleobase transmembrane transporter activ    |
| Coyp       | Golgi men  | G0:000685         | G0:003017  | G0:0003674                                          | molecular_function                            |
| Tlglp      | Essential  | G0:00069(G0:00319 | (G0:000545 | (sce04130)                                          | SNARE interactions in vesicular tra           |
| dithiol    | Cytoplasm  | G0:009885         | G0:000575  | G0:0004362                                          | glutathione-disulfide reductase activity;G    |
| mitochondr | Mitochondr | G0:003254         | G0:000575  | G0:000375                                           | (sce03010)Ribosome                            |
| Mmtlp      | Putative   | G0:000687         | G0:003195  | G0:0008324                                          | cation transmembrane transporter activity;    |
| SCF ubiqui | F-box prc  | G0:000075         | G0:000014  | G0:003067                                           | (sce04120)Ubiquitin mediated proteolysis; (sc |
| Sdh7p      | Mitochondr | G0:003455         | G0:000575  | G0:0003674                                          | molecular_function                            |
| chromatin  | Component  | G0:000625         | G0:000565  | G0:0003682                                          | chromatin binding;G0:0005488 binding;G0:00    |
| Spcl10p    | Inner pla  | G0:190245         | G0:0005823 | central plaque of spindle pole body;G0:0005822 inne |                                               |
| hypotheti  | Putative   | G0:000815         | G0:000557  | G0:0003674                                          | molecular_function                            |
| palmitoyl  | Palmitoyl  | G0:003047         | G0:003047  | G0:0019706                                          | protein-cysteine S-palmitoyltransferase ac    |
| hypotheti  | Putative   | G0:000815         | G0:000032  | G0:0003674                                          | molecular_function                            |
| Ssp120p    | Protein c  | G0:000815         | G0:000032  | G0:0005509                                          | calcium ion binding;G0:0046872 metal ion b    |
| Sfb3p      | Component  | G0:009011         | G0:003012  | G0:000504                                           | (sce04141)Protein processing in endoplasmic r |
| Hsk3p      | Essential  | G0:005195         | G0:004275  | G0:0051010                                          | microtubule plus-end binding;G0:0008017 mi    |
| mitochondr | Mitochondr | G0:000002         | G0:000575  | G0:007015                                           | (sce03010)Ribosome                            |
| Far7p      | Protein i  | G0:000032         | G0:000575  | G0:0003674                                          | molecular_function                            |
| Y' elemen  | Helicase   | G0:000072         | G0:000575  | G0:0003678                                          | DNA helicase activity;G0:0004386 helicase     |
| Zim17p     | Protein c  | G0:003015         | G0:000575  | G0:0051087                                          | chaperone binding;G0:0008270 zinc ion bind    |
| mannosyl-  | Alpha-1,   | G0:003597         | G0:000575  | G0:000457                                           | (sce)N-glycan precursor trimming; (M00073)N-  |
| Eislp      | Component  | G0:007094         | G0:003212  | G0:0003674                                          | molecular_function                            |
| hypotheti  | Dubious c  | G0:000815         | G0:000557  | G0:0003674                                          | molecular_function                            |
| Pex34p     | Protein t  | G0:000705         | G0:000577  | G0:0003674                                          | molecular_function                            |
| bifunctio  | Hydroxyme  | G0:000922         | G0:000585  | G0:005035                                           | (sce00730)Thiamine metabolism; (sce01100)Meta |
| serine-ty  | Cell deat  | G0:005165         | G0:000032  | G0:0004185                                          | serine-type carboxypeptidase activity;G0:0    |
| hypotheti  | Putative   | G0:003455         | G0:000575  | G0:0003674                                          | molecular_function                            |
| Ortlp      | Ornithine  | G0:199057         | G0:000575  | G0:0000064                                          | L-ornithine transmembrane transporter acti    |
| protein k  | Protein l  | G0:000015         | G0:000557  | G0:000467                                           | (sce04011)MAPK signaling pathway - yeast      |
| Gyllp      | Putative   | G0:001715         | G0:000595  | G0:0005096                                          | GTPase activator activity;G0:0030695 GTPas    |
| hypotheti  | Putative   | G0:000815         | G0:000585  | G0:0003674                                          | molecular_function                            |
| hypotheti  | Putative   | G0:004602         | G0:000075  | G0:0003674                                          | molecular_function                            |
| Spp2p      | Essential  | G0:003275         | G0:000565  | G0:0001671                                          | ATPase activator activity;G0:0060590 ATPas    |
| putative   | Putative   | G0:000655         | G0:000032  | G0:0004177                                          | aminopeptidase activity;G0:0008238 exopept    |
| exosome r  | Exosome r  | G0:007105         | G0:000017  | G0:000375                                           | (sce03018)RNA degradation                     |
| hypotheti  | Putative   | G0:001655         | G0:000577  | G0:0005052                                          | peroxisome matrix targeting signal-1 bindi    |
| Fmp27p     | Putative   | G0:000815         | G0:000575  | G0:0003674                                          | molecular_function                            |
| Midlp      | N-glycosy  | G0:009875         | G0:000575  | G0:0015275                                          | stretch-activated, cation-selective, calci    |
| DNA-bindin | Transcrip  | G0:200081         | G0:000075  | G0:0003684                                          | damaged DNA binding;G0:0043565 sequence-sp    |
| mitochondr | Mitochondr | G0:003254         | G0:000575  | G0:000375                                           | (sce03010)Ribosome                            |
| rRNA-proc  | Component  | G0:000047         | G0:003445  | G0:000367                                           | (sce03008)Ribosome biogenesis in eukaryotes   |
| Asalp      | Subunit c  | G0:000632         | G0:007025  | G0:0003674                                          | molecular_function                            |
| Golgi tra  | Essential  | G0:000035         | G0:001711  | G0:0003674                                          | molecular_function                            |
| Ran GTPas  | Ran GTPas  | G0:000665         | G0:000565  | G0:000855                                           | (Human)(hsa05203)Viral carcinogenesis; (hsa0  |
| Mdm10p     | Subunit c  | G0:004504         | G0:003285  | G0:000367                                           | (sce04139)Mitophagy - yeast                   |
| hypotheti  | Protein c  | G0:000815         | G0:000032  | G0:0003674                                          | molecular_function                            |
| Pso2p      | Nuclease   | G0:003185         | G0:000075  | G0:0035312                                          | 5'-3' exodeoxyribonuclease activity;G0:001    |
| CCR4-NOT   | Component  | G0:000705         | G0:001655  | G0:000455                                           | (sce03018                                     |

nucleoticNucleoticG0:000914G0:000578G0:0035529 NADH pyrophosphatase activity;G0:0004528 p  
ribosomalRibosomalG0:000645G0:002262G0:000375 (sce03010)Ribosome  
proteinProteinG0:009035G0:199061G0:0019888 protein phosphatase regulator activity;G0:0  
Y' elementDNA helicG0:00325(G0:000557G0:0003678 DNA helicase activity;G0:0004386 helicase  
Spol2p NucleolarG0:003155G0:000575G0:000367(sce04111)Cell cycle - yeast; (sce04113)Meio  
SCF ubiquPutative G0:00714(G0:00190(G0:0030674 protein binding, bridging;G0:0004842 ubiqu  
Pbn1p ComponentG0:00065(G0:199052G0:000005(sce00563)Glycosylphosphatidylinositol (GPI)  
Ecm19p Protein cG0:007155G0:003196G0:0003674 molecular\_function  
phosphopCatalyticG0:200075G0:000015G0:000472(sce04136)Autophagy - other; (sce03015)mRNA  
17-beta-1Putative G0:000925G0:000575G0:0046557 glucan endo-1,6-beta-glucosidase activity;  
MCM DNA lEssentialG0:00062(G0:007116G0:199016(sce03030)DNA replication; (sce04111)Cell cy  
Nab3p RNA-bindig0:007104G0:003564G0:0001068 transcription regulatory region RNA bindin  
None None None None None None  
alpha-1,2Alpha-1,2G0:190435G0:004432G0:0004571 mannosyl-oligosaccharide 1,2-alpha-mannosi  
putative CytoplasmG0:000005G0:000565G0:0004674 protein serine/threonine kinase activity;G  
hypothetiPutative G0:000815G0:001602G0:0003674 molecular\_function  
None None None None None None  
dolichyl-Beta subG0:001827G0:000825G0:000457(M00072)N-glycosylation by oligosaccharyltra  
Upc2p Sterol reG0:003596G0:004847G0:0000978 RNA polymerase II proximal promoter sequen  
hypothetiPutative G0:000815G0:001602G0:0003674 molecular\_function  
Fmp23p Putative G0:000815G0:000575G0:0003674 molecular\_function  
H3 historHistone cG0:009704G0:000077G0:0032931 histone acetyltransferase activity (H3-K56  
Rrt14p Putative G0:000815G0:000575G0:0003674 molecular\_function  
hypothetiPutative G0:000815G0:000557G0:0003674 molecular\_function  
Rrt13p Putative G0:000815G0:000557G0:0003674 molecular\_function  
ESCRT-0 cEndosomalG0:190466G0:003356G0:003226(sce04145)Phagosome; (sce04144)Endocytosis  
Tbflp Telobox-cG0:000101G0:000078G0:0043035 chromatin insulator sequence binding;G0:00  
inositol Inositol G0:001091G0:000575G0:003320(sce04070)Phosphatidylinositol signaling sys  
Lrg1p GTPase-acG0:009035G0:000595G0:0005096 GTPase activator activity;G0:0030695 GTPas  
Yarl1p Ankyrin-rG0:000005G0:000565G0:0051082 unfolded protein binding;G0:0005515 protei  
homoserirHomoserirG0:000905G0:000565G0:000441(M00018)Threonine biosynthesis, aspartate =>  
Sillp NucleoticG0:000661G0:000578G0:000077(sce04141)Protein processing in endoplasmic  
hexose trPutative G0:001575G0:000588G0:001557(sce04113)Meiosis - yeast  
formin-biProtein tG0:009035G0:000014G0:0008092 cytoskeletal protein binding;G0:0005515 pr  
Med8p Subunit cG0:000012G0:007084G0:0017025 TBP-class protein binding;G0:0000978 RNA p  
mitochondMitochondG0:004225G0:000576G0:0003735 structural constituent of ribosome;G0:0005  
SNARE-birEssentialG0:003554G0:000562G0:0000149 SNARE binding;G0:0042803 protein homodimer  
Hop2p Meiosis-cG0:000712G0:000079G0:0003690 double-stranded DNA binding;G0:0003677 DNA  
Sip4p C6 zinc cG0:006141G0:000565G0:0000978 RNA polymerase II proximal promoter sequen  
Arr1p TranscriG0:006135G0:000565G0:0000978 RNA polymerase II proximal promoter sequen  
hypothetiPutative zinc-cluster protein of unknown function  
homoaconiHomoaconiG0:001987G0:000575G0:000440(sce)Lysine biosynthesis, 2-oxoglutarate =>  
None None None None None None  
Pex25p PeripheraG0:001655G0:000577G0:0003674 molecular\_function  
Vps41p Subunit cG0:003288G0:003089G0:001715(sce04138)Autophagy - yeast  
peptide cCatalyticG0:001715G0:003141G0:0004596 peptide alpha-N-acetyltransferase activity  
chaperoniSubunit cG0:000645G0:000585G0:0051082 unfolded protein binding;G0:0005524 ATP bi  
mRNA spliEssentialG0:000034G0:00710(G0:0004004 ATP-dependent RNA helicase activity;G0:000  
Atg26p UDP-glucG0:003212G0:001602G0:0016906 sterol 3-beta-glucosyltransferase activity  
Dcplp Subunit cG0:003108G0:009874G0:000804(sce03018)RNA degradation  
Mxr2p MethionirG0:003005G0:000575G0:0033743 peptide-methionine (R)-S-oxide reductase a  
hypothetiPutative G0:000815G0:000557G0:0003674 molecular\_function  
Aim20p Protein cG0:000704G0:000032G0:0003674 molecular\_function  
Skolp Basic leiG0:006135G0:000582G0:005101(sce04011)MAPK signaling pathway - yeast

Pop3p Subunit cGO:00349fGO:00056fGO:00045f(sce03008)Ribosome biogenesis in eukaryotes;  
 Ste5p PheromoneGO:00007fGO:00708fGO:00050f(sce04011)MAPK signaling pathway - yeast  
 F1F0 ATP Alpha subGO:00159fGO:00057fGO:00469f(sce00190)Oxidative phosphorylation; (sce011  
 hypothetiPutative protein of unknown function; green fluorescent protein (GFP)-fusion pro  
 rRNA-bindProtein rGO:00000fGO:00306f(Human)GO:0003723 RNA binding;GO:0003676 nucleic acid  
 Mrllp Membrane GO:00070fGO:00100(GO:00050f(sce04145)Phagosome  
 ATP-deperCytoplasmGO:00169fGO:00446fGO:0000822 inositol hexakisphosphate binding;GO:00040  
 hypothetiPutative GO:00550fGO:00003fGO:0005524 ATP binding;GO:0032559 adenylyl ribonucleoti  
 hypothetiPutative GO:00081fGO:00055fGO:0003674 molecular\_function  
 Pet20p MitochondGO:00090fGO:00057fGO:0003674 molecular\_function  
 Yhc1p ComponentGO:00003fGO:00056fGO:00306f(sce03040)Spliceosome  
 spermine PolyamineGO:19037fGO:00003fGO:0000297 spermine transmembrane transporter activit  
 protein tMitochondGO:00450fGO:00427fGO:0008565 protein transporter activity;GO:0005215 tr  
 DNA-(apurMajor apGO:00062fGO:00057fGO:00083f(sce03410)Base excision repair  
 Shr5p PalmitoylGO:00182fGO:00424(GO:0019706 protein-cysteine S-palmitoyltransferase ac  
 asparagirCytosolicGO:00064fGO:00058fGO:00048f(sce00970)Aminoacyl-tRNA biosynthesis  
 osmosensTransmemGO:00014(GO:00446fGO:00050f(sce04011)MAPK signaling pathway - yeast  
 Rcr1p Protein cGO:00060fGO:00301fGO:0003674 molecular\_function  
 mitochondMitochondGO:00000fGO:00057fGO:0003735 structural constituent of ribosome;GO:0005  
 isocitratMitochondGO:00065fGO:00426fGO:00044f(M00010)Citrate cycle, first carbon oxidatio  
 None None None None None None  
 putative Putative GO:00068fGO:00343fGO:0016740 transferase activity;GO:0003824 catalytic  
 cysteine-CysteinyGO:00064fGO:00058fGO:00048f(sce00970)Aminoacyl-tRNA biosynthesis  
 hypothetiPutative protein of unknown function; green fluorescent protein (GFP)-fusion pro  
 hypothetiPutative GO:00081fGO:00055fGO:0003674 molecular\_function  
 hypothetiPutative protein of unknown function; non-essential gene; transcription repress  
 hypothetiPutative GO:00081fGO:00057fGO:0003674 molecular\_function  
 ammonium Ammonium GO:00724fGO:00058fGO:0008519 ammonium transmembrane transporter activit  
 decappingCatalyticGO:00310fGO:00987fGO:00500f(sce03018)RNA degradation  
 Fes1p Hsp70 (SfGO:00716fGO:00057fGO:0000774 adenylyl-nucleotide exchange factor activity  
 protein lProtein lGO:00448fGO:00059fGO:00046f(sce04111)Cell cycle - yeast  
 Ntolp Subunit cGO:00165fGO:19904fGO:0035064 methylated histone binding;GO:0140034 meth  
 tropomyosMinor iscGO:00071fGO:00001fGO:0003786 actin lateral binding;GO:0051015 actin fil  
 El ubiquiUbiquitinGO:00165fGO:00056fGO:00048f(sce04120)Ubiquitin mediated proteolysis  
 histidineHigh-affiGO:00897fGO:00057fGO:0005291 high-affinity L-histidine transmembrane tr  
 sterol acAcyl-CoAGO:00082fGO:00057fGO:00347f(sce00100)Steroid biosynthesis  
 None None None None None None  
 putative Probable GO:00157fGO:00057fGO:0008374 O-acyltransferase activity;GO:0015293 symp  
 carbonyl Aldehyde GO:19014fGO:00055fGO:0033721 aldehyde dehydrogenase (NADP+) activity;GO  
 Ent5p Protein cGO:00344fGO:00301fGO:0080025 phosphatidylinositol-3,5-bisphosphate bind  
 cullin CUbiquitinGO:00311fGO:00314fGO:00616f(sce04120)Ubiquitin mediated proteolysis  
 Syslp Integral GO:00430(GO:00301fGO:0003674 molecular\_function  
 Vps38p Part of fGO:00354fGO:00342fGO:0000149 SNARE binding;GO:0005515 protein binding;G  
 phosphoriPhosphoriGO:00061fGO:00057fGO:00437f(M00048)Inosine monophosphate biosynthesis, l  
 ribonuclMajor mitGO:00063(GO:00057fGO:00000f(Human)(hsa04210)Apoptosis  
 Pet18p Protein cGO:00067fGO:00058fGO:0003674 molecular\_function  
 Yap7p Putative GO:00010fGO:00007fGO:0000978 RNA polymerase II proximal promoter sequen  
 GPI-anchFunctionfGO:00065(GO:00315(GO:00045f(sce)GPI-anchor biosynthesis, core oligosaccl  
 uracil-DNURacil-DNGO:00975fGO:00057fGO:00048f(sce03410)Base excision repair  
 putative Cell wallGO:00715fGO:00092fGO:0042973 glucan endo-1,3-beta-D-glucosidase activit  
 Rtf1p Subunit cGO:20011fGO:00165fGO:1990269 RNA polymerase II C-terminal domain phosph  
 replicatiSubunit cGO:00062fGO:00056fGO:00036f(sce03430)Mismatch repair; (sce03030)DNA rep  
 Kch1p PotassiumGO:00718(GO:00059fGO:0015079 potassium ion transmembrane transporter ac  
 ATP-deperDEAD-box GO:00004fGO:00057fGO:0033680 ATP-dependent DNA/RNA helicase activity;GO

|            |           |                               |                                                       |      |      |
|------------|-----------|-------------------------------|-------------------------------------------------------|------|------|
| None       | None      | None                          | None                                                  | None | None |
| Phm7p      | Protein   | cG0:00342fG0:00003fG0:0005227 | calcium activated cation channel activity;            |      |      |
| ribosomal  | Ribosomal | G0:00021fG0:00306fG0:00037f   | (sce03010)Ribosome                                    |      |      |
| translati  | Translati | G0:00422fG0:00436fG0:00050f   | (sce03013)RNA transport                               |      |      |
| Tim18p     | Component | G0:00450fG0:00427fG0:0008177  | succinate dehydrogenase (ubiquinone) activ            |      |      |
| Npr3p      | Subunit   | cG0:19038fG0:00970fG0:0003674 | molecular_function                                    |      |      |
| CCR4-NOT   | RNase of  | G0:00439fG0:00300fG0:00045f   | (sce03018)RNA degradation                             |      |      |
| Fe-S clus  | Essential | G0:00020fG0:19045fG0:0051539  | 4 iron, 4 sulfur cluster binding;G0:005153            |      |      |
| cytochrom  | Subunit   | lG0:00061fG0:00057fG0:00041f  | (sce00190)Oxidative phosphorylation; (sce011          |      |      |
| Taf7p      | TFIID su  | G0:00511fG0:00056fG0:00162f   | (sce03022)Basal transcription factors                 |      |      |
| snoRNA-bi  | Protein   | rG0:00311fG0:00314fG0:00345f  | (sce03008)Ribosome biogenesis in eukaryotes           |      |      |
| DNA-direct | RNA polyn | G0:00319fG0:00056fG0:00039f   | (sce03020)RNA polymerase; (sce00240)Pyrimidi          |      |      |
| None       | None      | None                          | None                                                  | None | None |
| Nma11p     | Serine pr | G0:01201fG0:00056fG0:0004252  | serine-type endopeptidase activity;G0:0008            |      |      |
| adenine c  | Adenine c | G0:00061fG0:00056fG0:00000f   | (sce00230)Purine metabolism; (sce01100)Metab          |      |      |
| type 1 se  | Type 1 S/ | G0:19035fG0:00014fG0:00047f   | (sce03015)mRNA surveillance pathway; (sce041          |      |      |
| Cmr2p      | Putative  | G0:00081fG0:00059fG0:0003824  | catalytic activity;G0:0003674 molecular_fu            |      |      |
| Ssplp      | Protein   | iG0:00321fG0:00700fG0:00036f  | (sce04113)Meiosis - yeast                             |      |      |
| None       | None      | None                          | None                                                  | None | None |
| Hurlp      | Protein   | cG0:00162fG0:00160fG0:0003674 | molecular_function                                    |      |      |
| Erp5p      | Protein   | vG0:00070fG0:00301fG0:0003674 | molecular_function                                    |      |      |
| hypotheti  | Putative  | G0:00066fG0:00057fG0:0008374  | O-acyltransferase activity;G0:0016747 tran            |      |      |
| Dos2p      | Protein   | cG0:00081fG0:00057fG0:0003674 | molecular_function                                    |      |      |
| None       | None      | None                          | None                                                  | None | None |
| Ist1p      | Protein   | vG0:00325fG0:00057fG0:00036f  | (sce04144)Endocytosis                                 |      |      |
| hypotheti  | Putative  | G0:00081fG0:00055fG0:0003674  | molecular_function                                    |      |      |
| hexose ti  | Putative  | G0:19023fG0:00058fG0:00155f   | (sce04113)Meiosis - yeast                             |      |      |
| Emc6p      | Member o  | fG0:00349fG0:00725fG0:0003674 | molecular_function                                    |      |      |
| Nce101p    | Protein   | cG0:00093fG0:00058fG0:0003674 | molecular_function                                    |      |      |
| rDNA-bind  | Protein   | rG0:00063fG0:00057fG0:0001179 | RNA polymerase I transcription factor bind            |      |      |
| hypotheti  | Putative  | G0:00081fG0:00057fG0:0003674  | molecular_function                                    |      |      |
| protein    | Regulator | G0:0043666 regula             | G0:0019888 protein phosphatase regulator activity;G0: |      |      |
| Med1p      | Subunit   | cG0:00001fG0:00708fG0:0003712 | transcription coregulator activity;G0:0140            |      |      |
| None       | None      | None                          | None                                                  | None | None |
| U4/U6-U5   | Splicing  | G0:00342fG0:00465fG0:00306f   | (sce03040)Spliceosome                                 |      |      |
| arginine   | Arginine  | G0:19038fG0:00057fG0:0015181  | arginine transmembrane transporter activit            |      |      |
| serine C-  | Component | G0:00301fG0:00353fG0:00047f   | (sce00600)Sphingolipid metabolism; (sce04138          |      |      |
| Pog1p      | Nuclear   | cG0:00003fG0:00007fG0:0000978 | RNA polymerase II proximal promoter sequen            |      |      |
| autophagy  | Transmem  | G0:00617fG0:00619fG0:00036f   | (sce04136)Autophagy - other; (sce04138)Autop          |      |      |
| dynein li  | Dynein li | G0:00304fG0:00058fG0:0003774  | motor activity;G0:0017111 nucleoside-triph            |      |      |
| translatie | IF3j con  | G0:00004fG0:00104fG0:00037f   | (sce03013)RNA transport                               |      |      |
| hypotheti  | Putative  | G0:00081fG0:00057fG0:0003674  | molecular_function                                    |      |      |
| hypotheti  | Putative  | G0:00081fG0:00055fG0:0003674  | molecular_function                                    |      |      |
| 4-amino-f  | Protein   | iG0:00092fG0:00055fG0:00036f  | (sce00730)Thiamine metabolism; (sce01100)Met          |      |      |
| None       | None      | None                          | None                                                  | None | None |
| Rtt106p    | Histone   | cG0:00708fG0:00056fG0:0042393 | histone binding;G0:0003690 double-stranded            |      |      |
| hypotheti  | Eukaryoti | G0:00064fG0:00226fG0:0043022  | ribosome binding;G0:0003743 translation in            |      |      |
| hypotheti  | Putative  | G0:00081fG0:00056fG0:0003674  | molecular_function                                    |      |      |
| hypotheti  | Putative  | G0:00081fG0:00055fG0:0003674  | molecular_function                                    |      |      |
| hypotheti  | Putative  | G0:00081fG0:00057fG0:0003674  | molecular_function                                    |      |      |
| Rsc8p      | Component | G0:00063fG0:00165fG0:0015616  | DNA translocase activity;G0:0008094 DNA-de            |      |      |
| Vik1p      | Protein   | tG0:00070fG0:00058fG0:0008017 | microtubule binding;G0:0015631 tubulin bin            |      |      |
| hypotheti  | Protein   | cG0:00454fG0:00059fG0:0015035 | protein disulfide oxidoreductase activity;            |      |      |
| Far3p      | Protein   | cG0:00003fG0:00001fG0:0003674 | molecular_function                                    |      |      |

Mam3p Protein iGO:00300fGO:00003fGO:0003674 molecular\_function  
None None None None None None  
hypothetiPredictedGO:00081fGO:00059fGO:0003674 molecular\_function  
hypothetiPutative GO:00709fGO:00057fGO:0043022 ribosome binding;GO:0043021 ribonucleoprotei  
dolichyl-Dolichol-GO:00064fGO:00301fGO:00529f(sce)N-glycan precursor biosynthesis; (M0005f  
putative GlycosylfGO:00000fGO:00003fGO:0000026 alpha-1,2-mannosyltransferase activity;GO:0  
polynucleRNA 5'-trfGO:00985fGO:00315fGO:0004651 polynucleotide 5'-phosphatase activity;GO:0  
Chs5p ComponentGO:00060fGO:00340fGO:0031267 small GTPase binding;GO:0051020 GTPase bin  
serine/thSerine/thGO:00602fGO:00321fGO:00046f(sce04011)MAPK signaling pathway - yeast  
vacuolar RegulatorGO:00421fGO:00332fGO:0005516 calmodulin binding;GO:0005515 protein bind  
phosphoirPhosphoirGO:00344fGO:00707fGO:00800f(sce04136)Autophagy - other; (sce04138)Autopl  
E1 ubiquiSubunit cGO:00169fGO:00315fGO:00199f(sce04120)Ubiquitin mediated proteolysis  
ribosome GTPase wiGO:00709fGO:19905fGO:00037f(sce03015)mRNA surveillance pathway  
rRNA-bindEssentialGO:19026fGO:00306fGO:0008097 5S rRNA binding;GO:0019843 rRNA binding;GO  
Snx3p Sorting rGO:00344fGO:00319fGO:00322f(sce04144)Endocytosis  
Ast2p Lipid rafGO:00066fGO:00057fGO:0016491 oxidoreductase activity;GO:0003824 catalyt  
ribosomalRibosomalGO:00004fGO:00306fGO:00037f(sce03010)Ribosome  
hypothetiPutative protein of unknown function; identified based on homology to the filame  
Rtnlp ReticularGO:00717fGO:00325fGO:0003674 molecular\_function  
Uaf30p Subunit cGO:00427fGO:00005fGO:0001165 RNA polymerase I upstream control element  
hypothetiPutative GO:00081fGO:00057fGO:0003674 molecular\_function  
ribosomalRibosomalGO:00021fGO:00226fGO:00037f(sce03010)Ribosome  
Stblp Protein vGO:19004fGO:00309fGO:0008134 transcription factor binding;GO:0005515 pr  
None None None None None None  
NEDD8 fanUbiquitiGO:00451fGO:00056fGO:0031386 protein tag;GO:0031625 ubiquitin protein 1  
Berlp Protein iGO:00076fGO:00058fGO:0003674 molecular\_function  
mRNA-bindNucleolarGO:00004fGO:00306fGO:00037f(sce03008)Ribosome biogenesis in eukaryotes  
beta-tubuBeta-tubuGO:00304fGO:00058fGO:00052f(sce04145)Phagosome  
isoamyl fIsoamyl fGO:00060fGO:00057fGO:0016788 hydrolase activity, acting on ester bonds;f  
1-phosphfPhosphatiGO:00313fGO:00058fGO:00163f(sce00562)Inositol phosphate metabolism; (sc  
glycerol-NAD-deperGO:00069fGO:00093fGO:00479f(sce00564)Glycerophospholipid metabolism; (sc  
Est2p Reverse tGO:00013fGO:00003fGO:0003721 telomerase RNA reverse transcriptase activ  
F1F0 ATP Delta suGO:00159fGO:00057fGO:00469f(sce00190)Oxidative phosphorylation; (sce011f  
Swt2lp Protein iGO:00003fGO:00305fGO:0003674 molecular\_function  
hypothetiProtein cGO:00081fGO:00003fGO:0003674 molecular\_function  
protein fPhosphoryGO:00715fGO:00715fGO:0043495 protein membrane anchor;GO:0005515 protein  
Utp18p Small-suGO:00004fGO:00343fGO:00036f(sce03008)Ribosome biogenesis in eukaryotes  
SCF ubiqEvolutioGO:00070fGO:00315fGO:00616f(sce04120)Ubiquitin mediated proteolysis; (s  
mRNA spliCore Sm iGO:00003fGO:00056fGO:00037f(sce03040)Spliceosome  
bifunctioNa+/H+ arGO:00070fGO:00319fGO:0015386 potassium:proton antiporter activity;GO:00  
Ran GTPasConserveGO:00066fGO:0005634 nucleus;GO:0043231 intracellular membrane-bounded o  
Hprlp Subunit cGO:20012fGO:00004fGO:0032947 protein-containing complex scaffold activi  
Rsc4p ComponentGO:00063fGO:00165fGO:0015616 DNA translocase activity;GO:0070577 lysine  
imidazoleImidazoleGO:0000105 histidGO:00001f(sce)Histidine biosynthesis, PRPP => histidi  
Mrflp MitochonGO:00701fGO:00057fGO:0016149 translation release factor activity, codon  
tRNA (guetRNA metfGO:00304fGO:00056fGO:0052905 tRNA (guanine(9)-N(1))-methyltransferase a  
Bop2p Protein cGO:00081fGO:00057fGO:0003674 molecular\_function  
hypothetiHelicase-GO:00081fGO:00057fGO:0005524 ATP binding;GO:0032559 adenyf ribonucleoti  
phosphatiIntegral GO:00423fGO:00715fGO:0033149 FFAT motif binding;GO:0035091 phosphatidyl  
Sec39p ComponentGO:00325fGO:00709fGO:0003674 molecular\_function  
putative Putative GO:00193fGO:00057fGO:0019150 D-ribulokinase activity;GO:0019200 carbohy  
Gic2p RedundantGO:00903fGO:00059fGO:0005546 phosphatidylinositol-4,5-bisphosphate bind  
Ctr9p ComponentGO:20012fGO:00165fGO:1990269 RNA polymerase II C-terminal domain phosph  
dolichyl-UDP-glucGO:00064fGO:00057fGO:00045f(sce)N-glycan precursor biosynthesis; (M0005f

snoRNA-binding;GO:0030615 snoRNA binding;GO:0003723 RNA binding;GO:0005507  
 bifunctional;GO:0035816 Deoxyuridine metabolism;GO:0005616 Pyrimidine metabolism; (sce01100)M  
 Sld7p Protein vGO:003017GO:003126GO:0003674 molecular\_function  
 oxysterol-binding;GO:003472GO:003254GO:0008142 oxysterol binding;GO:0015248 sterol transp  
 formin-binding;GO:005101GO:000015GO:000552(sce04011)MAPK signaling pathway - yeast  
 putative Protein vGO:000688GO:000595GO:0019905 syntaxin binding;GO:0017137 Rab GTPase bin  
 hypotheticalPutative GO:000815GO:000557GO:0003674 molecular\_function  
 spermine-binding;GO:000655GO:000575GO:001676(sce00410)beta-Alanine metabolism; (sce00330)  
 Mic19p ComponentGO:00424(GO:006161GO:0003674 molecular\_function  
 Ssh4p SpecificityGO:004332GO:000032GO:0003674 molecular\_function  
 ATP-dependent NucleolarGO:000046GO:009707GO:000400(sce03015)mRNA surveillance pathway; (sce030  
 None None None None None None  
 Ioc4p Member ofGO:000706GO:003645GO:0016887 ATPase activity;GO:0017111 nucleoside-trip  
 Fth1p Putative GO:003475GO:003357GO:0015093 ferrous iron transmembrane transporter act  
 Fyv12p Protein cGO:000815GO:001602GO:0003674 molecular\_function  
 ribosomalRibosomalGO:000046GO:003068GO:000375(sce03010)Ribosome  
 hexose transportPutative GO:001575GO:000032GO:000535(sce04113)Meiosis - yeast  
 co-chaperoneCochaperoneGO:005138GO:000015GO:0051087 chaperone binding;GO:0030674 protein bindi  
 putative Putative GO:000655GO:000575GO:0046872 metal ion binding;GO:0016787 hydrolase act  
 ubiquitinUbiquitinGO:190466GO:00319(GO:000484(sce04144)Endocytosis  
 Aim18p Protein cGO:000815GO:000575GO:0016872 intramolecular lyase activity;GO:0016853 i  
 trifunctionalAlpha subunitGO:004275GO:000585GO:000431(sce)Fatty acid biosynthesis, elongation; (M  
 cyclin-dependentCDK inhibitorGO:000075GO:012017GO:000486(sce04011)MAPK signaling pathway - yeast; (s  
 Snf5p Subunit cGO:200021GO:001651GO:0015616 DNA translocase activity;GO:0001102 RNA po  
 aspartateMitochondrialGO:007014GO:000575GO:000481(sce00970)Aminoacyl-tRNA biosynthesis  
 Coa3p MitochondrialGO:007015GO:00313(GO:0003674 molecular\_function  
 hypotheticalPutative GO:000815GO:000564GO:0003674 molecular\_function  
 Mmolp Protein cGO:000815GO:000575GO:0003674 molecular\_function  
 Roy1p GTPase inhibitorGO:000662GO:003068GO:0005095 GTPase inhibitor activity;GO:0030695 GTPas  
 Cgi121p ComponentGO:000075GO:00004(GO:0003674 molecular\_function  
 FG-nucleoporinFG-nucleoporinGO:000005GO:004461GO:001705(sce03013)RNA transport  
 Vcx1p Vacuolar GO:000688GO:000032GO:0015369 calcium:proton antiporter activity;GO:0051  
 Pho80p Cyclin; iGO:001624GO:199086GO:001655(sce04111)Cell cycle - yeast  
 ATP-bindingATP-bindingGO:000071GO:003238GO:000040(sce03430)Mismatch repair  
 ubiquitinUbiquitinGO:003045GO:000015GO:003445(sce04120)Ubiquitin mediated proteolysis; (s  
 Sbe22p Protein iGO:00315(GO:000575GO:0003674 molecular\_function  
 RNA-bindingSubunit cGO:003496GO:000565GO:000452(sce03008)Ribosome biogenesis in eukaryotes;  
 forkhead Forkhead GO:009005GO:000582GO:0019237 centromeric DNA binding;GO:0003688 DNA rep  
 ribosomalRibosomalGO:000005GO:002262GO:007015(sce03010)Ribosome  
 hypotheticalPutative GO:000688GO:000032GO:0003674 molecular\_function  
 Cos8p EndosomalGO:004332GO:000032GO:0003674 molecular\_function  
 Ssz1p Hsp70 precursorGO:005108GO:000584GO:0044183 protein binding involved in protein foldin  
 Tec1p TranscriptionGO:001052GO:199052GO:000115(sce04392)Hippo signaling pathway -multiple  
 O-phosphoserine3-phosphoserineGO:000655GO:000575GO:000464(M00020)Serine biosynthesis, glycerate-3P =>  
 Vfalp Protein tGO:003278GO:000575GO:0001671 ATPase activator activity;GO:0060590 ATPas  
 Mch4p Protein vGO:001571GO:000032GO:0008028 monocarboxylic acid transmembrane transpor  
 anaphase Subunit cGO:003007GO:000565GO:003035(sce04120)Ubiquitin mediated proteolysis; (s  
 mitochondrialMitochondrialGO:003254GO:000575GO:007015(sce03010)Ribosome  
 hypotheticalPutative GO:000815GO:000557GO:0003674 molecular\_function  
 Spo23p Protein cGO:003045GO:000557GO:0003674 molecular\_function  
 DNA-bindingProtein lGO:190426GO:000075GO:004216(sce03440)Homologous recombination  
 Shulp ComponentGO:000075GO:009715GO:0003674 molecular\_function  
 Pet100p ChaperoneGO:003361GO:00313(GO:0051082 unfolded protein binding;GO:0005515 protei  
 stress-responseTranscriptionGO:006135GO:000565GO:0000978 RNA polymerase II proximal promoter sequen



mannose-6-phosphate ER membrane protein complex GO:0006515 (GO:0005783 GO:005131 (sce00563) Glycosylphosphatidylinositol (GPI)-hypothetical protein GO:0008115 GO:0005623 GO:0003674 molecular\_function

acyl-CoA Fatty-acyltransferase GO:003354 GO:0005783 GO:0003995 (sce00592) alpha-Linolenic acid metabolism; (GO:0005922) Tti2p Subunit GO:007147 GO:007020 (GO:0003674 molecular\_function

hypothetical protein GO:0008115 GO:0005577 GO:0003674 molecular\_function

coatamer Essential GO:003251 GO:003011 GO:0043130 ubiquitin binding; GO:0032182 ubiquitin-like protein binding

Cac2p Subunit GO:0006355 GO:003318 GO:0042393 histone binding; GO:0005515 protein binding

Rsc2p Component GO:007091 GO:001658 GO:0015616 DNA translocase activity; GO:0008094 DNA-dependent

Lnplp Lunapark GO:006171 (GO:007178 GO:0046872 metal ion binding; GO:0043169 cation binding

None None None None None None

mitochondrial Mitochondrial GO:003254 GO:0005783 GO:0003735 structural constituent of ribosome; GO:0005

Cwc2p Member of GO:000038 GO:007101 (GO:0000384 first spliceosomal transesterification act

mitochondrial Mitochondrial GO:003254 GO:0005783 GO:0003735 structural constituent of ribosome; GO:0005

TFIIH core Subunit GO:0008115 GO:0005623 GO:0003674 molecular\_function

hypothetical protein GO:0008115 GO:0005577 GO:0003674 molecular\_function

Nyv1p v-SNARE GO:004214 GO:000032 GO:0005484 SNAP receptor activity; GO:0000149 SNARE bi

CCR4-NOT Component GO:003296 GO:003001 GO:0003674 (sce03018) RNA degradation

tRNA (guanine-2'-O-methyltransferase GO:003048 GO:0005783 GO:0009020 tRNA (guanosine-2'-O-)-methyltransferase a

3-deoxy-7-deoxy-1 GO:000942 GO:0005783 GO:000384 (M00022) Shikimate pathway, phosphoenolpyruvate

ribosomal Protein GO:000218 GO:002262 GO:0003735 (sce03010) Ribosome

aminophosphatase Trans-golgi GO:000074 GO:007086 GO:0004012 phospholipid-translocating ATPase activity

Gvp36p BAR domain GO:003095 GO:003017 GO:0003674 molecular\_function

pyruvate Highly conserved GO:000688 GO:003131 (GO:0050833 pyruvate transmembrane transporter activit

Cu(2+)-transporter Cu(2+)-transporter GO:006001 (GO:001251 GO:004368 (Human) (hsa04978) Mineral absorption; (hsa015

Tcm62p Protein GO:003455 GO:0005783 GO:0051082 unfolded protein binding; GO:0005524 ATP bi

H(+)-transporter Subunit GO:000705 GO:000022 GO:004696 (sce04145) Phagosome; (sce00190) Oxidative pho

Hpc2p Subunit GO:0006355 GO:000041 GO:0031491 nucleosome binding; GO:0003682 chromatin bi

mRNA-binding RNA binding GO:000708 GO:000568 GO:0035614 snRNA stem-loop binding; GO:0030619 U1 snRN

Lds2p Protein GO:003047 GO:0005623 GO:0003674 molecular\_function

Vba4p Protein GO:199082 GO:000032 GO:0015174 basic amino acid transmembrane transporter

ketoreductase Microsomal GO:004276 GO:0005783 GO:010235 (sce) Fatty acid biosynthesis, elongation, en

ribosomal Ribosomal GO:000218 GO:002262 GO:007018 (sce03010) Ribosome

Pex7p Peroxisomal GO:001658 GO:0005783 GO:0005055 (sce04146) Peroxisome

mRNA splicing Component GO:000038 GO:000024 GO:0045131 pre-mRNA branch point binding; GO:0036002 p

None None None None None None

Vhr1p Transcription GO:006142 GO:0005623 GO:0000977 RNA polymerase II regulatory region sequen

Cir1p Mitochondrial GO:002291 (GO:0005783 GO:0009055 electron transfer activity; GO:0016491 oxid

Fhl1p Regulator GO:001068 GO:003254 GO:0001226 RNA polymerase II transcription corepresso

Sfilp Centrin GO:003047 GO:000582 GO:0003674 molecular\_function

recombinase Strand exchange GO:199042 GO:000079 GO:000015 (sce03440) Homologous recombination

Mus81p Subunit GO:003157 GO:004847 GO:004825 (sce03440) Homologous recombination

Gall1p Subunit GO:200021 GO:007084 GO:0001095 TFIIIE-class transcription factor complex b

None None None None None None

Spr6p Protein GO:003048 GO:0005783 GO:0003674 molecular\_function

putative Protein GO:007094 GO:0005623 GO:0008420 RNA polymerase II CTD heptapeptide repeat

amphiphysal Amphiphysal GO:006098 GO:199052 GO:0008289 lipid binding; GO:0008092 cytoskeletal prot

Asf2p Anti-silencing GO:003048 GO:000078 GO:0003674 molecular\_function

Hug1p Ribonucleic GO:190511 GO:0005623 GO:1990846 ribonucleoside-diphosphate reductase inhib

None None None None None None

Dxo1p mRNA 5' to 3' GO:000025 GO:0005783 GO:0008409 5' to 3' exonuclease activity; GO:0004527 exon

phosphatidyl Lipid phosphate GO:000664 GO:000015 GO:0000810 diacylglycerol diphosphate phosphatase act

None None None None None None

Mbb1p Putative GO:0008115 GO:0005577 GO:0003674 molecular\_function

hypothetical protein Dubious GO:0008115 GO:0005577 GO:0003674 molecular\_function

Fis1p Protein iGO:00436fGO:00057fGO:00036f (sce04139)Mitophagy - yeast  
 tyrosine PhosphotyGO:00001fGO:00056fGO:00047f (sce04011)MAPK signaling pathway - yeast  
 putative PeroxisomGO:00066fGO:00057fGO:0004165 dodecenoyl-CoA delta-isomerase activity;GO:  
 Csi2p Protein cGO:00081fGO:00059fGO:0003674 molecular\_function  
 Taf11p TFIID subGO:00511fGO:00056fGO:00162f (sce03022)Basal transcription factors  
 protein-lS-adenosyGO:00180fGO:00057fGO:0016279 protein-lysine N-methyltransferase activit  
 Arf famiSoluble (GO:00344fGO:00058(GO:0003924 GTPase activity;GO:0005525 GTP binding;GO:  
 exosome rExosome rGO:00710fGO:00001fGO:00037f (sce03018)RNA degradation  
 DNA-directRNA polynGO:00427fGO:00056fGO:00039f (sce03020)RNA polymerase; (sce00240)Pyrimidin  
 phosphatiUDP-glyccGO:00065(GO:00005(GO:00171f (sce)GPI-anchor biosynthesis, core oligosaccl  
 mitochondrMitochondrGO:00905(GO:00057fGO:0004525 ribonuclease III activity;GO:0032296 doubl  
 hypothetiPutative protein of unknown function; not required for growth of cells lacking t  
 hypothetiProtein cGO:00550fGO:00057fGO:0003674 molecular\_function  
 Cu-bindirCopper-biGO:00068fGO:00057fGO:0008379 thioredoxin peroxidase activity;GO:0051920  
 isocitratPeroxisomGO:00067fGO:19904fGO:00044f (M00010)Citrate cycle, first carbon oxidatio  
 DNA-bindirRNA polynGO:00011fGO:00056fGO:0043565 sequence-specific DNA binding;GO:0003677 D  
 hypothetiPutative GO:00081fGO:00433fGO:0003674 molecular\_function  
 Rlp7p NucleolarGO:00004fGO:00306fGO:00198f (sce03010)Ribosome  
 Utp30p Putative GO:00004fGO:00306fGO:0003723 RNA binding;GO:0003676 nucleic acid bindin  
 hypothetiPutative GO:00081fGO:00055fGO:0003674 molecular\_function  
 Inn1p EssentialGO:19034fGO:00001fGO:0005543 phospholipid binding;GO:0008289 lipid bind  
 glutamyl-Subunit cGO:00706fGO:00309fGO:0050567 glutaminyl-tRNA synthase (glutamine-hydrol  
 Bsc6p Protein cGO:00550fGO:00301fGO:0003674 molecular\_function  
 Spc29p Inner plfGO:00304fGO:00058fGO:0005200 structural constituent of cytoskeleton;GO:  
 Dop1p Golgi-locGO:00068fGO:00058(GO:0003674 molecular\_function  
 hypothetiPutative GO:00081fGO:00055fGO:0003674 molecular\_function  
 pyridoxalProtein cGO:00428fGO:00056fGO:0004733 pyridoxamine-phosphate oxidase activity;GO  
 cyclin-dfCyclin-liGO:00004fGO:00165fGO:0000979 RNA polymerase II core promoter sequence-s  
 DNA-directRNA polynGO:00427fGO:00056fGO:00010f (sce03020)RNA polymerase; (sce00240)Pyrimidin  
 None None None None None None  
 None None None None None None  
 Vab2p Subunit cGO:00070fGO:00310fGO:0003674 molecular\_function  
 Sec20p Membrane GO:00482fGO:00312(GO:00054f (sce04130)SNARE interactions in vesicular tra  
 cleavage ComponentGO:00724fGO:00057fGO:00037f (sce03015)mRNA surveillance pathway  
 Zn(2+) trVacuolar GO:00068fGO:00003fGO:00053f (Human) (hsa04978)Mineral absorption  
 hypothetiPutative GO:00081fGO:00055fGO:0003674 molecular\_function  
 hypothetiProtein cGO:00081fGO:00057fGO:0003674 molecular\_function  
 SCF ubiquF-box recGO:00714(GO:00190(GO:0030674 protein binding, bridging;GO:0004842 ubiqu  
 glyceralGlyceralGO:00060fGO:00092fGO:00043f (M00002)Glycolysis, core module involving th  
 Rmd6p Protein iGO:00304fGO:00055fGO:0003674 molecular\_function  
 Exo5p MitochondrGO:00362fGO:00057fGO:0045145 single-stranded DNA 5'-3' exodeoxyribonuc  
 mitogen-fCytoplasmGO:00072fGO:19903fGO:00001f (sce04139)Mitophagy - yeast; (sce04011)MAPK  
 Stb6p Protein iGO:00081fGO:00708fGO:0003674 molecular\_function  
 Efg1p EssentialGO:00003fGO:00306fGO:0003674 molecular\_function  
 Bud2p GTPase acGO:00315fGO:00056fGO:0005096 GTPase activator activity;GO:0030695 GTPas  
 hypothetiPutative GO:00081fGO:00160fGO:0003674 molecular\_function  
 Hsp70 famCytoplasmGO:00000fGO:00104fGO:00441f (sce04213)Longevity regulating pathway - mul  
 adenylyl-AdenylylsGO:00193fGO:00057fGO:00040f (M00176)Assimilatory sulfate reduction, sulfi  
 protein-lS-adenosyGO:00180fGO:00057fGO:0016279 protein-lysine N-methyltransferase activit  
 hypothetiPutative GO:00081fGO:00057fGO:0048037 cofactor binding;GO:0005488 binding;GO:000  
 branched-MitochondrGO:00195(GO:00057fGO:00526f (sce)Valine/isoleucine biosynthesis, pyruvat  
 Stel3p DipeptidyGO:00073fGO:00058(GO:0004177 aminopeptidase activity;GO:0008238 exopept  
 DNA-bindirProtein iGO:00304fGO:00701fGO:0042162 telomeric DNA binding;GO:0043565 sequence-  
 translatiPolypeptiGO:00021fGO:00184fGO:00161f (sce03015)mRNA surveillance pathway

hypotheti8-oxo-dG1G0:00081fG0:00055fG0:0044715 8-oxo-dGDP phosphatase activity;G0:0017110  
 tyrosine-MitochondG0:00701fG0:00057fG0:00048f (sce00970) Aminoacyl-tRNA biosynthesis  
 None None None None None None  
 mRNA-bindProtein iG0:00004fG0:00306fG0:0003729 mRNA binding;G0:0003723 RNA binding;G0:000  
 phosphatiPhosphatiG0:00468fG0:00057fG0:00044f (sce00562) Inositol phosphate metabolism; (sc  
 None None None None None None  
 hypothetiPutative G0:00550fG0:00057fG0:0003674 molecular\_function  
 Aiplp Actin corG0:00510fG0:00426fG0:0051015 actin filament binding;G0:0003779 actin bi  
 Dot6p Protein iG0:00615fG0:00702fG0:0043565 sequence-specific DNA binding;G0:0003677 D  
 None None None None None None  
 hypothetiDubious cG0:00081fG0:00160fG0:0003674 molecular\_function  
 UDP-glucGalactoseG0:00334fG0:00057fG0:00081f (sce) Nucleotide sugar biosynthesis, galactos  
 25S rRNA NucleolarG0:00311fG0:00057fG0:0016433 rRNA (adenine) methyltransferase activity;  
 Egt2p GlycosylG0:00009fG0:00304fG0:0008810 cellulase activity;G0:0004553 hydrolase ac  
 Mfmlp MitochondG0:00450fG0:00057fG0:0015095 magnesium ion transmembrane transporter ac  
 drug-resTranscriG0:20010fG0:00058fG0:0001228 DNA-binding transcription activator activi  
 Yiflp Integral G0:00150fG0:00301fG0:0003674 molecular\_function  
 None None None None None None  
 hypothetiPutative G0:00081fG0:00160fG0:0003674 molecular\_function  
 alkaline RepressilG0:00464fG0:00003fG0:00473f (sce) Tetrahydrofolate biosynthesis, GTP => TI  
 Ent3p Protein cG0:00344fG0:00301fG0:00800f (sce04144) Endocytosis  
 None None None None None None  
 Oaf3p Putative G0:00001fG0:00057fG0:0000981 DNA-binding transcription factor activity,  
 hypothetiPutative G0:00081fG0:00160fG0:0003674 molecular\_function  
 None None None None None None  
 transcriSpt4p/5p G0:20012fG0:00057fG0:0001181 RNA polymerase I general transcription ini  
 NADPH:quiNADPH-deG0:00345fG0:00056fG0:0032440 2-alkenal reductase [NAD(P)] activity;G0:0  
 serine/thNonessentG0:19031fG0:00719fG0:0004674 protein serine/threonine kinase activity;G  
 Crnlp Coronin; G0:00343fG0:00304fG0:0071933 Arp2/3 complex binding;G0:0030674 protein  
 hypothetiProtein cG0:00081fG0:00057fG0:0003674 molecular\_function  
 None None None None None None  
 Sar familGuanine rG0:00034fG0:00301fG0:00050f (sce04141) Protein processing in endoplasmic :  
 Rna15p ComponentG0:00724fG0:00058fG0:00037f (sce03015) mRNA surveillance pathway  
 hypothetiPutative G0:00081fG0:00055fG0:0003674 molecular\_function  
 mitochondMitochondG0:00325fG0:00057fG0:0003735 structural constituent of ribosome;G0:0005  
 MIND comEssentialG0:00345fG0:00008fG0:0003674 molecular\_function  
 trehalosePhosphatG0:00304fG0:00059fG0:00038f (sce00500) Starch and sucrose metabolism; (sc  
 hypothetiDubious cG0:00081fG0:00160fG0:0003674 molecular\_function  
 Spa2p ComponentG0:00313fG0:19027fG0:00050f (sce04011) MAPK signaling pathway - yeast  
 putative Protein cG0:00014fG0:00092fG0:00039f (sce00740) Riboflavin metabolism; (sce00730) TI  
 divalent Divalent G0:00068fG0:00057fG0:0015086 cadmium ion transmembrane transporter acti  
 mitochondMitochondG0:00325fG0:00057fG0:00037f (sce03010) Ribosome  
 anaphase Subunit cG0:00300fG0:00056fG0:00616f (sce04120) Ubiquitin mediated proteolysis; (s  
 Eaf1p ComponentG0:00062fG0:00352fG0:0003677 DNA binding;G0:0003676 nucleic acid bindin  
 GTPase-acGTPase-acG0:00457fG0:00057fG0:0005096 GTPase activator activity;G0:0030695 GTPas  
 Aim23p MitochondG0:00701fG0:00057fG0:0043022 ribosome binding;G0:0003743 translation in  
 ESCRT-IIIMyristoylG0:19046fG0:00008fG0:00055f (sce04144) Endocytosis  
 hypothetiPutative G0:00081fG0:00057fG0:0005524 ATP binding;G0:0032559 adenylyl ribonucleoti  
 SKI complSki complG0:00704fG0:00550fG0:00040f (sce03018) RNA degradation  
 phosphopEnolase lG0:00328fG0:00000fG0:00046f (M00002) Glycolysis, core module involving th

serine/thrPalmitoylGO:001025GO:000595GO:000467 (sce04392)Hippo signaling pathway -multiple  
 seripaupMember ofGO:00315(GO:000927GO:0005199 structural constituent of cell wall;GO:000  
 ubiquitinRING domGO:199011GO:199011GO:0043023 ribosomal large subunit binding;GO:0043022  
 U1 snRNP ComponentGO:000035GO:000565GO:003061 (sce03040)Spliceosome  
 Tax4p EH domainGO:003225GO:00004(GO:0003674 molecular\_function  
 ubiquitinE3 ubiquiGO:000651GO:000077GO:0004842 ubiquitin-protein transferase activity;GO:  
 Vps60p Protein iGO:003251GO:000032GO:000367 (sce04144)Endocytosis  
 None None None None None None  
 None None None None None None  
 2-isopropylAlpha-isGO:000905GO:000575GO:000385 (sce)Leucine biosynthesis, 2-oxoisovalerate  
 Mei4p MeiosisGO:004215GO:000079GO:0003674 molecular\_function  
 Spilp GPI-anchGO:001044GO:000927GO:0005199 structural constituent of cell wall;GO:000  
 Pbalp Protein iGO:004324GO:000575GO:0003674 molecular\_function  
 ribosomalProtein cGO:000215GO:002262GO:000375 (sce03010)Ribosome  
 calmoduliCalmoduliGO:190352GO:000582GO:005101 (sce04070)Phosphatidylinositol signaling sys  
 L-aminoacAlpha amiGO:001987GO:000575GO:000404 (M00030)Lysine biosynthesis, AAA pathway, 2-  
 Srl2p Protein cGO:000615GO:000565GO:0003674 molecular\_function  
 Rsc9p ComponentGO:006155GO:001655GO:0015616 DNA translocase activity;GO:0008094 DNA-de  
 Pth4p Protein sGO:007012GO:000575GO:0003747 translation release factor activity;GO:000  
 Sac7p GTPase acGO:009005GO:000595GO:000505 (sce04011)MAPK signaling pathway - yeast  
 S-adenosylS-adenosylGO:000645GO:000575GO:0008276 protein methyltransferase activity;GO:0008  
 histone cTrichostGO:007095GO:000562GO:0032041 NAD-dependent histone deacetylase activity  
 U4/U6-U5 Lsm (LikeGO:003045GO:000565GO:000375 (sce03018)RNA degradation; (sce03040)Spliceo  
 serine/thrSerine/thrGO:004602GO:000565GO:0004674 protein serine/threonine kinase activity;G  
 mitogen-activatedMAPKKK acGO:000015GO:004335GO:000470 (sce04139)Mitophagy - yeast; (sce04011)MAPK  
 poly(A)-cCatalyticGO:000025GO:003125GO:000455 (sce03018)RNA degradation  
 None None None None None None  
 RNA-bindingSignal reGO:000661GO:000575GO:003094 (sce03060)Protein export  
 1, 3-beta-1, 3-beta-GO:007197GO:000927GO:0042124 1, 3-beta-glucanosyltransferase activity;GO  
 None None None None None None  
 exopolypExopolypGO:000675GO:000575GO:000430 (sce00230)Purine metabolism  
 E1 ubiquiSubunit cGO:001692GO:003151GO:001994 (sce04120)Ubiquitin mediated proteolysis  
 glutamineGlutamineGO:00973(GO:000575GO:000481 (sce00970)Aminoacyl-tRNA biosynthesis; (sce0  
 Tom20p ComponentGO:001605GO:000575GO:0030943 mitochondrion targeting sequence binding;G  
 Mex67p Poly (A) RGO:000005GO:004227GO:000375 (sce03015)mRNA surveillance pathway; (sce030  
 hypothetiPutative protein of unknown function; green fluorescent protein (GFP)-fusion pro  
 chromatinNucleosomGO:000045GO:003532GO:0001073 transcription antitermination factor activ  
 hypothetiPutative GO:000815GO:000575GO:0003674 molecular\_function  
 phosphogl6-phosphGO:000905GO:000575GO:000461 (M00006)Pentose phosphate pathway, oxidative  
 tetheringComponentGO:003285GO:003325GO:003067 (sce04138)Autophagy - yeast  
 Pmd1p Protein vGO:003045GO:000575GO:0003674 molecular\_function  
 hypothetiPutative protein of unknown function  
 Rimlp ssDNA-birGO:009025GO:004264GO:0003697 single-stranded DNA binding;GO:0003677 DNA  
 TFIIH/NEFComponentGO:001697GO:000565GO:001561 (sce03022)Basal transcription factors; (sce0  
 thioredoCytoplasmGO:008005GO:000575GO:0015035 protein disulfide oxidoreductase activity;  
 cAMP-depccAMP-depGO:00106(GO:000595GO:000465 (sce04213)Longevity regulating pathway - mul  
 microtubMicrotubGO:003157GO:003537GO:0051010 microtubule plus-end binding;GO:0008017 mi  
 Ino4p TranscriGO:000865GO:009057GO:0000978 RNA polymerase II proximal promoter sequen  
 hypothetiDubious cGO:000815GO:000575GO:0003674 molecular\_function  
 oligo-1,6Alpha-glucoseGO:000002GO:000557GO:000457 (sce00052)Galactose metabolism; (sce00500)St  
 hypothetiPutative GO:000815GO:000575GO:0003674 molecular\_function  
 Pcl1p Cyclin, iGO:00311(GO:00003(GO:001655 (sce04111)Cell cycle - yeast  
 thioredoThiol-spGO:004274GO:000575GO:000837 (sce04122)Sulfur relay system  
 amphiphysCalmoduliGO:006095GO:199052GO:000551 (sce04144)Endocytosis

glutathione binding;GO:000674GO:000575GO:0043295 glutathione binding;GO:1900750 oligopeptidase activity;GO:000674GO:000575GO:0043295  
 ssDNA endonuclease activity;GO:000075GO:000011GO:000001(sce03420)Nucleotide excision repair  
 UV-damage endonuclease activity;GO:000075GO:000011GO:0008094 DNA-dependent ATPase activity;GO:0003684 d  
 Br11p Essential GO:000695GO:003196GO:0003674 molecular\_function  
 Rbl2p Protein GO:000702GO:000587GO:0048487 beta-tubulin binding;GO:0015631 tubulin binding  
 Mei5p Meiosis GO:000075GO:000075GO:0003674 molecular\_function  
 Eaf7p Subunit GO:001657GO:003526GO:0003674 molecular\_function  
 Rax2p N-glycosylase activity;GO:006116GO:190292GO:0003674 molecular\_function  
 Millp Predicted GO:000815GO:001602GO:0003674 molecular\_function  
 hypothetical Putative GO:005511GO:000575GO:0016639 oxidoreductase activity, acting on the CH-OH group of  
 putative Ankyrin repeat domain protein;GO:001834GO:000032GO:0019706 protein-cysteine S-palmitoyltransferase ac  
 hypothetical Putative GO:000815GO:007194GO:0003674 molecular\_function  
 ESCRT-III Class E VGO:190466GO:000081GO:000367(sce04144)Endocytosis  
 maturase-Maturase GO:000037GO:000575GO:0004536 deoxyribonuclease activity;GO:0004519 endonuclease  
 RNA-DNA helicase activity;GO:004315GO:000565GO:000452(sce03030)DNA replication  
 Osw7p Protein GO:003047GO:000575GO:0003674 molecular\_function  
 Spo13p Meiotic recombination protein;GO:005117GO:007268GO:0003674 molecular\_function  
 S-adenosylmethionine synthetase;GO:000647GO:000557GO:003075(sce00340)Histidine metabolism  
 NADH kinase;GO:000674GO:000575GO:0042736 NADH kinase activity;GO:0003951 NAD+ kinase activity  
 amino acid zipper domain containing protein;GO:001065GO:000075GO:000115(sce04138)Autophagy - yeast  
 Dfmlp Endoplasmic reticulum protein;GO:003045GO:000085GO:000367(sce04141)Protein processing in endoplasmic reticulum  
 thiamine Thiamine GO:000922GO:000575GO:000475(sce00730)Thiamine metabolism; (sce01100)Metabolism  
 Chs6p Member of the chitinase family;GO:003422GO:003404GO:0003674 molecular\_function  
 oxidoreductase NAD(+) dependent;GO:005511GO:000584GO:003115(sce00260)Glycine, serine and threonine metabolism  
 pheromone receptor;GO:00718(GO:000595GO:0015079 potassium ion transmembrane transporter activity;GO:000595GO:0015079  
 NEDD4 family protein;GO:20002(GO:003047GO:004315(sce04120)Ubiquitin mediated proteolysis; (sce04120)Ubiquitin mediated proteolysis  
 mRNA processing endonuclease activity;GO:007105GO:000565GO:0004521 endoribonuclease activity;GO:0004540 ribonuclease  
 snoRNA biogenesis component;GO:004227GO:003445GO:003051(sce03008)Ribosome biogenesis in eukaryotes  
 putative Protein (GO:003526GO:009755GO:000416(sce00515)Mannose type O-glycan biosynthesis  
 phosphoserine phosphatase;GO:000655GO:000565GO:000464(M00020)Serine biosynthesis, glycerate-3P => serine  
 putative Putative GO:000684GO:000032GO:0015123 acetate transmembrane transporter activity  
 Snnlp Subunit GO:000705GO:003105GO:0003674 molecular\_function  
 aspartyl aminopeptidase;GO:00315(GO:000927GO:0004190 aspartic-type endopeptidase activity;GO:000927GO:0004190  
 metal cation transporter;GO:000688GO:003196GO:0005385 zinc ion transmembrane transporter activity;GO:000688GO:003196GO:0005385  
 histone H1;GO:006115GO:007021GO:003204(sce04213)Longevity regulating pathway - multiple species  
 mitochondrial protein;GO:003254GO:000575GO:0003735 structural constituent of ribosome;GO:000575GO:0003735  
 Bbc1p Protein GO:003431GO:003047GO:0017024 myosin I binding;GO:0017022 myosin binding  
 H(+)-transporter;GO:000705GO:000022GO:004696(sce04145)Phagosome; (sce00190)Oxidative phosphorylation  
 Gat3p Protein GO:000635GO:000565GO:0008270 zinc ion binding;GO:0043565 sequence-specific DNA binding  
 Vhtlp High-affinity biotin binding;GO:001587GO:000585GO:0015225 biotin transmembrane transporter activity;GO:001587GO:000585GO:0015225  
 3'-5' poly(A) specific exonuclease activity;GO:004366GO:000557GO:0004535 poly(A)-specific ribonuclease activity;GO:004366GO:000557GO:0004535  
 Vid22p Glycosylase activity;GO:000705GO:000577GO:0003677 DNA binding;GO:0046872 metal ion binding;GO:0046872 metal ion binding  
 Erv46p Protein GO:000685GO:003017GO:0003674 molecular\_function  
 Smalp Protein GO:003215GO:000562GO:0003674 molecular\_function  
 Pprlp Zinc finger protein;GO:190035GO:000565GO:0000981 DNA-binding transcription factor activity, sequence-specific DNA binding  
 Vac14p Enzyme repressor;GO:190377GO:007077GO:003294(Human)(hsa05203)Viral carcinogenesis; (hsa05203)Viral carcinogenesis  
 Dsc3p Subunit GO:000685GO:004465GO:0003674 molecular\_function  
 None None None None None None  
 Mtc7p Protein GO:000815GO:001602GO:0003674 molecular\_function  
 monothiolase;GO:003105GO:000582GO:0015038 glutathione disulfide oxidoreductase activity;GO:003105GO:000582GO:0015038  
 Dse2p Daughter GO:000715GO:000927GO:0015926 glucosidase activity;GO:0004553 hydrolase activity  
 alpha-mannosidase;GO:00193(GO:003427GO:000455(sce00511)Other glycan degradation  
 None None None None None None  
 Sds23p Protein GO:003007GO:000565GO:0003674 molecular\_function

Scm3p Nonhistor GO:20000 GO:00007 GO:0097030 CENP-A containing nucleosome binding; GO:00  
 Pex14p Central c GO:00165 GO:19904 GO:00306 (sce04146) Peroxisome  
 Rnp1p Ribonucle GO:00422 GO:00104 GO:0008143 poly(A) binding; GO:0008266 poly(U) RNA bin  
 None None None None None None  
 Vtc4p Vacuolar GO:00067 GO:00332 GO:0008976 polyphosphate kinase activity; GO:0000822 i  
 serine/thr Ser-Thr r GO:19001 GO:00056 GO:0004674 protein serine/threonine kinase activity; G  
 putative Probable GO:00361 GO:00057 GO:0016746 transferase activity, transferring acyl gr  
 seipin Seipin ir GO:00343 GO:00325 GO:0003674 molecular\_function  
 glucose-(Glucose-( GO:00442 GO:00056 GO:00479 (sce00010) Glycolysis / Gluconeogenesis; (sce  
 non-cano Non-cano GO:00710 GO:00314 GO:00344 (sce03018) RNA degradation  
 peptidyl Mitochon GO:00004 GO:00057 GO:0016018 cyclosporin A binding; GO:0003755 peptidyl-  
 thiamine Thiazole GO:00528 GO:00058 GO:00081 (sce00730) Thiamine metabolism; (sce01100) Met  
 protein-(Cytoplas GO:00353 GO:00057 GO:0004725 protein tyrosine phosphatase activity; GO:0  
 Ahc2p Component GO:00165 GO:0005671 Ada2/Gcn5/Ada3 transcription activator complex; GO:1  
 spermine Polyamine GO:19037 GO:00003 GO:0000297 spermine transmembrane transporter activit  
 Axl2p Integral GO:00071 GO:00001 GO:0005509 calcium ion binding; GO:0046872 metal ion b  
 Pet494p Mitochon GO:00701 GO:00057 GO:0045182 translation regulator activity; GO:0003674  
 polynucle Polynucle GO:00004 GO:00308 GO:0051731 polynucleotide 5'-hydroxyl-kinase activity  
 protein Mitochon GO:19041 GO:00057 GO:0004740 pyruvate dehydrogenase (acetyl-transferrin  
 Env9p Protein r GO:00066 GO:00058 GO:00164 (Human) (hsa00830) Retinol metabolism; (hsa011  
 succinate Iron-sulf GO:00060 GO:00057 GO:00515 (sce) Citrate cycle, second carbon oxidation,  
 Pam17p Constitue GO:00301 GO:00014 (GO:0003674 molecular\_function  
 Mss51p Specific GO:00701 GO:00313 GO:0045182 translation regulator activity; GO:0003674  
 sepiapter Putative GO:00551 GO:00160 GO:0102306 benzil reductase [(S)-benzoin-forming] act  
 Rbslp Protein i GO:19901 GO:00056 GO:0003723 RNA binding; GO:0003676 nucleic acid bindin  
 hypotheti Putative GO:00081 GO:00055 GO:0003674 molecular\_function  
 guanine r Guanine r GO:00422 GO:00306 GO:00050 (sce03008) Ribosome biogenesis in eukaryotes  
 ubiquitir Component GO:00712 GO:00331 GO:00084 (sce04136) Autophagy - other; (sce04139) Mitop  
 glyceroph Glyceroph GO:00464 GO:00058 GO:00473 (sce00564) Glycerophospholipid metabolism  
 Ysc83p Non-esser GO:00081 GO:00057 GO:0003674 molecular\_function  
 Dfg16p Probable GO:00071 GO:00058 GO:0003674 molecular\_function  
 protein Mitochond DNA repli GO:19025 GO:00312 GO:0070182 DNA polymerase binding; GO:0030295 protein  
 pheromone Pheromone GO:00160 GO:00057 GO:0003674 molecular\_function  
 hypotheti Protein c GO:00081 GO:00056 GO:0003674 molecular\_function  
 hypotheti Protein c GO:00081 GO:00055 GO:0003674 molecular\_function  
 tethering Subunit c GO:00328 GO:00332 GO:00350 (sce04138) Autophagy - yeast  
 thymidyl Thymidyl GO:00062 GO:00343 GO:00047 (sce00670) One carbon pool by folate; (sce002  
 putative Cytoplas GO:00716 GO:19903 (GO:0061630 ubiquitin protein ligase activity; GO:00616  
 Seglp Component GO:00709 GO:00321 GO:0043022 ribosome binding; GO:0043021 ribonucleoprot  
 ribosomal Ribosomal GO:00171 GO:00226 GO:00037 (sce03010) Ribosome  
 Cha4p DNA bindi GO:00090 GO:00056 GO:0000981 DNA-binding transcription factor activity,  
 DNA-direct Mitochon GO:00320 GO:00057 GO:00038 (sce04139) Mitophagy - yeast; (sce01100) Metab  
 Aep3p Peripher GO:00701 GO:00057 GO:0003674 molecular\_function  
 guanylate Guanylate GO:00467 GO:00058 GO:00043 (sce) Guanine ribonucleotide biosynthesis IMP  
 putative Subunit c GO:00159 GO:19901 GO:00041 (sce) Coenzyme A biosynthesis, pantothenate =  
 chromatin General r GO:00359 GO:00170 GO:00800 (sce04011) MAPK signaling pathway - yeast; (s  
 Mlp2p Myosin-li GO:19019 GO:00446 GO:00170 (sce03013) RNA transport  
 None None None None None None  
 high-mobi High-mobi GO:00011 GO:00007 GO:0032407 MutSalpha complex binding; GO:0032404 misma  
 pseudouri Mitochon GO:00311 GO:00057 GO:0106029 tRNA pseudouridine synthase activity; GO:00  
 B-type cy B-type cy GO:00106 GO:00003 (GO:00165 (sce04111) Cell cycle - yeast; (sce04113) Meio  
 peptidyl Nucleolar GO:00515 GO:00057 GO:0005527 macrolide binding; GO:0003755 peptidyl-prol  
 Iqg1p Essential GO:19034 GO:00001 GO:0051015 actin filament binding; GO:0005516 calmodul  
 seripaup Protein c GO:00315 (GO:00092 GO:0005199 structural constituent of cell wall; GO:000

carboxylMitochondrionGO:003596GO:000574GO:000462 (sce00564)Glycerophospholipid metabolism  
3-isopropyl IsopropylGO:000905GO:000931GO:000386 (sce)Leucine biosynthesis, 2-oxoisovalerate :  
putative Protein iGO:003047GO:000014GO:000384 (sce00500)Starch and sucrose metabolism; (sc  
None None None None None None  
None None None None None None  
Bem3p Rho GTPaseGO:003502GO:000595GO:003226 (sce04011)MAPK signaling pathway - yeast  
3'-5' DN/3'-5' DN/GO:006054GO:000078GO:0043140 ATP-dependent 3'-5' DNA helicase activity;  
Cue1p UbiquitinGO:009705GO:000085GO:009702 (sce04141)Protein processing in endoplasmic :  
Bch2p Member ofGO:003422GO:003404GO:0003674 molecular\_function  
Sec31p ComponentGO:009011GO:003012GO:000515 (sce04141)Protein processing in endoplasmic :  
Ady4p StructuralGO:003045GO:003597GO:0005198 structural molecule activity;GO:0003674 mo  
None None None None None None  
Atp22p Specific GO:007015GO:000574GO:0045182 translation regulator activity;GO:0003674 :  
hypotheticalProtein cGO:007094GO:003212GO:0003674 molecular\_function  
calcineurinCalcineurinGO:000075GO:000595GO:000472 (Human) (hsa05014)Amyotrophic lateral sclerosis  
Oac1p MitochondrionGO:190155GO:000574GO:0034658 isopropylmalate transmembrane transporter :  
aspartateVacuolar GO:19034(GO:000032GO:0061459 L-arginine transmembrane transporter activ  
serine/threonine/S/T proteaseGO:006105GO:000595GO:000467 (Human) (hsa04068)FoxO signaling pathway; (hs  
Mbr1p Protein iGO:000906GO:000575GO:0003674 molecular\_function  
DNA translocationATP-dependentGO:006015GO:000862GO:0015616 DNA translocase activity;GO:0019237 centrom  
Ies4p ComponentGO:000072GO:003101GO:0003674 molecular\_function  
Atg33p MitochondrionGO:000042GO:003196GO:000367 (sce04139)Mitophagy - yeast  
hypotheticalPutative GO:000815GO:000557GO:0003674 molecular\_function  
Env11p Protein iGO:000662GO:000577GO:0003677 DNA binding;GO:0046872 metal ion binding;GO  
glyoxylateGlyoxylateGO:005511GO:000582GO:0016618 hydroxypyruvate reductase activity;GO:0030  
Gcs1p ADP-ribosylationGO:003005GO:00058(GO:000505 (sce04144)Endocytosis  
None None None None None None  
GTPase-activatorGTPase-activatorGO:000702GO:000587GO:0005096 GTPase activator activity;GO:0030695 GTPase  
Rrg9p Protein cGO:000000(GO:000575GO:0003674 molecular\_function  
fatty acidElongase;GO:003462GO:003017GO:010275 (sce)Fatty acid biosynthesis, elongation, en  
hypotheticalPutative GO:000815GO:000557GO:0003674 molecular\_function  
Dslp Daughter GO:001096GO:000595GO:0031435 mitogen-activated protein kinase kinase ki  
ribosomalProtein cGO:000046GO:002262GO:000375 (sce03010)Ribosome  
Nsi1p RNA polymeraseGO:19000(GO:003355GO:0043022 ribosome binding;GO:0043021 ribonucleoprotein  
carboxypeptidasePutative serine type carboxypeptidase; role in phytochelatin synthesis; green fl  
mitochondrionMitochondrionGO:007012GO:000576GO:0003735 structural constituent of ribosome;GO:0005  
DNA-directedRNA polymeraseGO:004275GO:000566GO:000105 (sce03020)RNA polymerase; (sce00240)Pyrimidin  
phosphorylationProtein iGO:005122GO:003086GO:000815 (sce04111)Cell cycle - yeast; (sce04113)Meio  
ribosomalRibosomalGO:004685GO:002262GO:000375 (sce03010)Ribosome  
oleate-acylOleate-acylGO:006142GO:008971GO:0000978 RNA polymerase II proximal promoter sequen  
Rds2p TranscriptionGO:006141GO:000565GO:0000978 RNA polymerase II proximal promoter sequen  
Scd5p Protein iGO:200037GO:003047GO:0008157 protein phosphatase 1 binding;GO:0019903 p  
hypotheticalProtein cGO:000815GO:000565GO:0003674 molecular\_function  
Nut1p ComponentGO:000635GO:001655GO:0003712 transcription coregulator activity;GO:0140  
hypotheticalPutative GO:000815GO:000575GO:0003674 molecular\_function  
DNA-bindingZinc clusterGO:003595GO:000565GO:0000978 RNA polymerase II proximal promoter sequen  
transcriptionTranscriptionGO:004585GO:000565GO:0008301 DNA binding, bending;GO:0003713 transcript  
1-phosphatePhosphatidylinositolGO:004685GO:000575GO:000445 (sce00562)Inositol phosphate metabolism; (sc  
None None None None None None  
hypotheticalDubious cGO:000815GO:000557GO:0003674 molecular\_function  
Nup84p Subunit cGO:003535GO:003105GO:001705 (sce03013)RNA transport  
mitoticProtein sGO:006151GO:000595GO:000505 (sce04111)Cell cycle - yeast  
ATP phosphorylationATP phosphorylationGO:00001(GO:000575GO:000387 (sce)Histidine biosynthesis, PRPP => histidin  
Hot1p TranscriptionGO:007236GO:000565GO:001625 (sce04011)MAPK signaling pathway - yeast

Red1p Protein cGO:00515fGO:00008(GO:00314f(sce04113)Meiosis - yeast  
 Etr1p 2-enoyl tGO:00066fGO:00057fGO:00166f(sce00062)Fatty acid elongation; (sce01212)F  
 Rab familRab familGO:00344fGO:00550fGO:00039f(sce04144)Endocytosis  
 Svflp Protein vGO:00345fGO:00056fGO:0003674 molecular\_function  
 None None None None None None  
 phospholiAcyltransGO:00194fGO:00970fGO:00460f(sce00561)Glycerolipid metabolism  
 Yhplp Homeobox GO:00719fGO:00007fGO:00009f(sce04111)Cell cycle - yeast  
 Spc98p ComponentGO:00514fGO:00009fGO:00510f11 microtubule minus-end binding;GO:0043015 g  
 kynureninKynureninGO:00970fGO:00057fGO:00162f(sce00380)Tryptophan metabolism; (sce01100)M  
 Smmlp DihydrouGO:00029fGO:00056fGO:0102264 tRNA-dihydrouridine20 synthase activity;GO  
 putative Serine/thGO:00315fGO:00058fGO:0004674 protein serine/threonine kinase activity;G  
 Hap2p Subunit cGO:00004fGO:00166(GO:0000978 RNA polymerase II proximal promoter sequen  
 exocyst sEssentialGO:00905fGO:00056fGO:0003674 molecular\_function  
 myosin 1 Type II nGO:00009fGO:00001fGO:00001f(Human) (hsa05416)Viral myocarditis; (hsa0426  
 Aro80p Zinc finGO:00065fGO:00056fGO:0000981 DNA-binding transcription factor activity,  
 Qri5p MitochondGO:00325fGO:00313(GO:0003735 structural constituent of ribosome;GO:0005  
 Ugx2p Protein cGO:00081fGO:00055fGO:0003674 molecular\_function  
 Apl5p Delta adGO:00066fGO:00301fGO:00055f(Human) (hsa04142)Lysosome  
 Perl p Protein cGO:00300fGO:00003fGO:0016788 hydrolase activity, acting on ester bonds;1  
 putative Putative GO:00342fGO:00055fGO:0004360 glutamine-fructose-6-phosphate transaminas  
 Tvp23p Integral GO:00093(GO:00301fGO:0003674 molecular\_function  
 None None None None None None  
 hypothetiPutative GO:00081fGO:00055fGO:0003674 molecular\_function  
 DNA-directRNA polynGO:00427fGO:00056fGO:00039f(sce03020)RNA polymerase; (sce00240)Pyrimidi  
 Tda8p Putative GO:00081fGO:00055fGO:0003674 molecular\_function  
 Oaz1p RegulatorGO:20011fGO:00057fGO:0008073 ornithine decarboxylase inhibitor activity  
 Sohlp Subunit cGO:00063fGO:00708fGO:0003713 transcription coactivator activity;GO:0003  
 hypothetiProtein cGO:00070fGO:00160fGO:0003674 molecular\_function  
 dynein irDynein irGO:20005fGO:00058fGO:00085f(sce04145)Phagosome  
 None None None None None None  
 protein kATPase rGO:19010(GO:00313fGO:0016887 ATPase activity;GO:0004672 protein kinase  
 Dphlp Protein rGO:00171fGO:00057fGO:0016740 transferase activity;GO:0003824 catalytic  
 hypothetiPutative GO:00081fGO:00160fGO:0003674 molecular\_function  
 sulfate sATP sulfGO:00101fGO:00057fGO:00047f(sce00261)Monobactam biosynthesis; (M00176)A  
 Mpc54p ComponentGO:00321fGO:00359fGO:0005198 structural molecule activity;GO:0003674 mo  
 None None None None None None  
 diacylglyDiacylglyGO:00353fGO:00058fGO:00038f(sce00561)Glycerolipid metabolism  
 Rad2 fami5'-3' excGO:00312fGO:00056fGO:00353f(sce03430)Mismatch repair  
 Lsm12p Protein cGO:00160fGO:00104fGO:0003723 RNA binding;GO:0003676 nucleic acid bindin  
 CCR4-NOT ComponentGO:00310fGO:00300fGO:00048f(sce03018)RNA degradation  
 putative Protein vGO:00165fGO:00314fGO:0004842 ubiquitin-protein transferase activity;GO:  
 serine/thSerine/thGO:00459fGO:00058fGO:0004674 protein serine/threonine kinase activity;G  
 Brxlp NucleolarGO:00004fGO:00306f(Human)GO:0003723 RNA binding;GO:0003676 nucleic acid  
 metallodiCys-Gly nGO:00067fGO:00058fGO:00705f(sce00480)Glutathione metabolism; (sce01100)l  
 Himlp Protein cGO:00062fGO:00055fGO:0003674 molecular\_function  
 UDP-N-acUDP-N-acGO:00064fGO:00435fGO:00039f(sce)N-glycan precursor biosynthesis; (M0005  
 hypothetiProtein of unknown function; green fluorescent protein (GFP)-fusion protein loca  
 hypothetiPutative GO:00083fGO:00056fGO:0003674 molecular\_function  
 Rrt12p Probable GO:00304fGO:00056fGO:0004252 serine-type endopeptidase activity;GO:0008  
 protein-tEssentialGO:00312(GO:00312(GO:00085f(sce03060)Protein export; (sce04141)Protein j  
 Kap123p KaryopherGO:20002fGO:00104fGO:0008139 nuclear localization sequence binding;GO:0  
 Rab familEndosomalGO:00617(GO:00057fGO:00039f(sce04145)Phagosome; (sce04144)Endocytosis  
 palmitoylAcyl-prot(Human)Gc(Human)Gc(Human)Gc(Human) (hsa00564)Glycerophospholipid metabol  
 3', 5'-cycLow-affirGO:00460fGO:00055fGO:00041f(sce00230)Purine metabolism



phosphatase PIK-related GO:19053 GO:00319 GO:000467 (sce04136) Autophagy - other; (sce04213) Long-term  
hypothetical Putative GO:00081 GO:00055 GO:0003674 molecular\_function

hexose transporter Putative GO:00157 GO:00003 GO:00053 (sce04113) Meiosis - yeast

Spt10p Histone HGO:00970 GO:00007 GO:0032931 histone acetyltransferase activity (H3-K56  
hypothetical Putative GO:00081 GO:00055 GO:0003674 molecular\_function

RNA-binding Essential GO:00004 GO:00306 GO:0042134 rRNA primary transcript binding; GO:0019843  
cyclin-dependent Cyclin HGO:00515 GO:00080 GO:0008353 RNA polymerase II CTD heptapeptide repeat  
Swa2p Auxilin-1 GO:00723 GO:00057 GO:0043130 ubiquitin binding; GO:0030276 clathrin binding  
protein phosphatase Regulator GO:00615 GO:00001 GO:0019888 protein phosphatase regulator activity; GO:  
ribosome Specific GO:00063 GO:00057 GO:0051082 unfolded protein binding; GO:0005515 protein  
leucine--Cytosolic GO:00064 GO:00057 GO:00048 (sce00970) Aminoacyl-tRNA biosynthesis

negative Subunit C GO:00164 GO:00170 GO:0017025 TBP-class protein binding; GO:0001047 core  
None None None None None None

Ncs6p Protein HGO:00021 GO:00021 GO:00000 (sce04122) Sulfur relay system

cytochrome Cytochrome GO:00180 GO:00057 GO:00044 (sce00860) Porphyrin and chlorophyll metabolism  
Sec63 component Non-essential GO:00312 GO:00312 GO:0008565 protein transporter activity; GO:0005215 tr  
DNA-binding Mitochondrial GO:00901 GO:00002 GO:0008301 DNA binding, bending; GO:0008134 transcript  
mismatch Protein HGO:00328 GO:00323 GO:00321 (sce03430) Mismatch repair

Msalp Activator GO:00070 GO:00056 GO:0003674 molecular\_function

Cip1p Cyclin-dependent GO:00457 GO:00056 GO:0004861 cyclin-dependent protein serine/threonine  
Mdr1p Cytoplasmic GO:00906 GO:00057 GO:0017137 Rab GTPase binding; GO:0005096 GTPase activ  
NEDD8 ligase Scaffold- GO:00514 GO:00001 GO:0097602 cullin family protein binding; GO:0031624 u  
Ina22p F1F0 ATP GO:00336 GO:19905 GO:0003674 molecular\_function

Pbp4p Pbp1p binding GO:00081 GO:00104 GO:0003674 molecular\_function

nucleoprotein Cytoplasmic GO:00169 GO:00446 GO:0000822 inositol hexakisphosphate binding; GO:00313  
Blp1p Subunit C GO:00070 GO:00310 GO:0003674 molecular\_function

Ics2p Protein C GO:00081 GO:00055 GO:0003674 molecular\_function

ubiquitin Peroxisome GO:00165 GO:00057 GO:00048 (sce04146) Peroxisome

septin Spindle Sporulation GO:00304 GO:00056 GO:00329 (sce04113) Meiosis - yeast

syntaxin-Hydrophilic GO:00355 GO:00301 GO:0019905 syntaxin binding; GO:0000149 SNARE binding;  
None None None None None None

Fyv4p Protein C GO:00325 GO:00057 GO:0003735 structural constituent of ribosome; GO:0005  
Rrf1p Mitochondrial GO:00064 GO:00057 GO:0003747 translation release factor activity; GO:000  
Trk2p Component GO:00300 GO:00058 GO:0140107 high-affinity potassium ion transmembrane  
putative F-box protein GO:00313 GO:00190 GO:0043022 ribosome binding; GO:0030674 protein bindin  
Mum2p Protein C GO:20002 GO:00363 GO:0005515 protein binding; GO:0005488 binding; GO:0003  
Bni5p Linker protein GO:00009 GO:00001 GO:0030674 protein binding, bridging; GO:0060090 molec  
Wsc4p Endoplasmic GO:00450 GO:00057 GO:0008565 protein transporter activity; GO:0005215 tr  
mitochondrial Mitochondrial GO:00325 GO:00057 GO:00037 (sce03010) Ribosome

Cbflp Basic helix GO:00614 GO:00897 GO:0019237 centromeric DNA binding; GO:0001103 RNA pol  
ubiquitin Ubiquitin GO:00109 GO:00057 GO:00048 (Human) (hsa04068) FoxO signaling pathway; (hsa  
None None None None None None

DNA-dependent DNA-dependent GO:00320 GO:00056 GO:001561 (sce03440) Homologous recombination

DNA-directed RNA polymerase GO:00427 GO:00056 GO:00010 (sce03020) RNA polymerase; (sce00240) Pyrimidin  
putative Putative ADP-ribose-1''-monophosphatase; converts ADP-ribose-1''-monophosphate to  
Nop8p Nucleolar GO:00004 GO:00057 GO:0003723 RNA binding; GO:0003676 nucleic acid bindin  
adenylosuccinyl Adenylosuccinyl GO:00442 GO:00057 GO:000401 (sce) Adenine ribonucleotide biosynthesis, IM  
TRAPP subunit Core component GO:00068 GO:19900 GO:0003674 molecular\_function

None None None None None None

diphthine Methyltransferase GO:00171 GO:00057 GO:0004164 diphthine synthase activity; GO:0008757 S-a  
ATP-dependent Component GO:00064 GO:00003 GO:00040 (sce03015) mRNA surveillance pathway; (sce030  
1-phosphate Phosphate GO:00468 GO:00058 GO:00044 (sce00562) Inositol phosphate metabolism; (sc  
protein BETA subunit GO:00183 GO:00059 GO:0004662 CAAX-protein geranylgeranyltransferase act  
hypothetical Putative GO:00081 GO:00160 GO:0003674 molecular\_function

Cbs2p Mitochondrion GO:003331 GO:003131 GO:0008677 2-dehydropantoate 2-reductase activity; GO:0005942 mannose-1-GDP-mannose 6-phosphate transferase activity; GO:0005943 (sce00051) Fructose and mannose metabolism; (sce00051) Pin2p Exomer-decay GO:000815 GO:000032 GO:0003674 molecular\_function

DNA-directed RNA polymerase GO:004275 GO:000566 GO:000105 (sce03020) RNA polymerase; (sce00240) Pyrimidine metabolism; (sce00240) Putative Protein v GO:005507 GO:000032 GO:0000293 ferric-chelate reductase activity; GO:001675 (sce00167) putative mitogen-activated protein kinase GO:000016 GO:000575 GO:000470 (sce04011) MAPK signaling pathway - yeast

hypothetical Mitochondrion GO:190255 GO:000574 GO:1902557 5'-adenylyl sulfate transmembrane transporter activity; GO:000574 (sce00057) ornithine-L-ornithine aminotransferase GO:001012 GO:000582 GO:000458 (sce00330) Arginine and proline metabolism; (sce00330) Vba2p Permease GO:199082 GO:000032 GO:0015174 basic amino acid transmembrane transporter activity; GO:0015174 (sce00151) hypothetical Putative protein of unknown function; YGR168C is not an essential gene

CDP-diacylglycerol 4-phosphate 6-phosphatase GO:000666 GO:000574 GO:000388 (sce00562) Inositol phosphate metabolism; (sce00562) cyclin-dependent protein kinase GO:000045 GO:001659 GO:0008353 RNA polymerase II CTD heptapeptide repeat binding; GO:001659 (sce00165) ribosomal Ribosomal GO:004227 GO:002262 GO:000375 (sce03010) Ribosome

Atg23p Peripheral membrane protein GO:003445 GO:003404 GO:000367 (sce04138) Autophagy - yeast

Ca(2+)-dependent cysteine-type endopeptidase GO:000651 GO:000582 GO:0004198 calcium-dependent cysteine-type endopeptidase activity; GO:000582 (sce00058) DNA damage-inducible protein GO:000625 GO:000078 GO:0003677 DNA binding; GO:0003676 nucleic acid binding; GO:0003676 (sce00036) Hsp10p Mitochondrion GO:004504 GO:000575 GO:0051087 chaperone binding; GO:0051082 unfolded protein binding; GO:0051082 (sce00510) Atg21p Phosphoinositide 3-kinase GO:003445 GO:003404 GO:0080025 phosphatidylinositol-3,5-bisphosphate binding; GO:0080025 (sce00800) CCR4-NOT Complex Component GO:000025 GO:003001 GO:000484 (sce03018) RNA degradation

condensing subunit GO:190334 GO:000079 GO:000368 (sce04111) Cell cycle - yeast

dynein light chain Cytoplasm GO:200055 GO:199042 GO:0008574 ATP-dependent microtubule motor activity; GO:0008574 (sce00085) inositol Phosphatase GO:000667 GO:007091 GO:0045140 inositol phosphoceramide synthase activity; GO:0045140 (sce00451) phosphoryl Enolase, GO:000609 GO:000001 GO:000463 (M00002) Glycolysis, core module involving the phosphoglycerate kinase GO:000609 (sce00060) None None None None None None

hypothetical Putative GO:000815 GO:001602 GO:0003674 molecular\_function

Ctf18p Subunit c GO:003575 GO:003139 GO:0005524 ATP binding; GO:0032559 adenylyl ribonucleotide transferase activity; GO:0032559 (sce00325) protein kinase GO:000705 GO:000077 GO:000467 (sce04111) Cell cycle - yeast; (sce04113) Meiosis GO:000705 (sce00070) ATP-binding ATPase GO:000005 GO:003068 GO:0042624 ATPase activity, uncoupled; GO:0043022 ribonucleoside diphosphate kinase GO:0043022 (sce00430) anthranilate Anthranilate GO:000016 GO:000575 GO:000404 (sce) Tryptophan biosynthesis, chorismate => anthranilate GO:000404 (sce00040) phosphoglycerate Phosphoglycerate GO:000595 GO:000582 GO:000461 (M00549) Nucleotide sugar biosynthesis, glucose-6-phosphate ATP-binding Plasma membrane GO:003537 GO:000575 GO:0034041 sterol-transporting ATPase activity; GO:0034041 (sce00340) Fmp33p Putative GO:000815 GO:003196 GO:0003674 molecular\_function

SUMO1 protein Protease GO:001692 GO:000565 GO:0070140 SUMO-specific isopeptidase activity; GO:0070140 (sce00701) histone H1 Nucleosome GO:003145 GO:009911 GO:003115 (sce00310) Lysine degradation

hypothetical Putative GO:000815 GO:000557 GO:0003674 molecular\_function

Tma10p Protein c GO:000815 GO:000575 GO:0043023 ribosomal large subunit binding; GO:0043024 (sce00430) N,N-dimethyl Flavin-cytochrome P450 GO:000645 GO:000578 GO:0004499 N,N-dimethylaniline monooxygenase activity; GO:0004499 (sce00044) Stu2p Microtubule GO:003095 GO:003537 GO:0051010 microtubule plus-end binding; GO:0008017 microtubule plus-end binding; GO:0008017 (sce00080) carboxymethyl Putative GO:000815 GO:000575 GO:000880 (sce01130) Biosynthesis of antibiotics; (sce01130) None None None None None None

Swm1p Subunit c GO:190482 GO:000568 GO:006165 (sce04120) Ubiquitin mediated proteolysis; (sce04120) Rga2p GTPase-activator protein GO:003116 GO:003217 GO:000509 (sce04011) MAPK signaling pathway - yeast

bifunctional Diadenosine triphosphate phosphatase GO:000916 GO:000565 GO:000478 (sce00230) Purine metabolism

hypothetical Putative GO:000815 GO:000557 GO:0003674 molecular\_function

hypothetical Putative GO:000815 GO:000557 GO:0003674 molecular\_function

hypothetical Protein c GO:000815 GO:000032 GO:0003674 molecular\_function

histone H1 Histone H1 GO:000635 GO:003129 GO:0046982 protein heterodimerization activity; GO:0046982 (sce00469) endopeptidase Catalytic GO:000662 GO:004272 GO:000825 (sce03060) Protein export

Jid1p Probable GO:000815 GO:003196 GO:0003674 molecular\_function

L-serine Catabolic GO:000656 GO:004264 GO:000479 (sce) Isoleucine biosynthesis, threonine => L-serine GO:000479 (sce00047) ribosomal Protein c GO:000215 GO:002262 GO:000375 (sce03010) Ribosome

dihydroly Dihydroly GO:000608 GO:000596 GO:000474 (M00307) Pyruvate oxidation, pyruvate => acetyl-CoA GO:000474 (sce00047) mannose-6-phosphate Protein i GO:001586 GO:000927 GO:005137 (sce) GPI-anchor biosynthesis, core oligosaccharide biosynthesis GO:005137 (sce00513) Cst6p Basic leucine aminopeptidase GO:006142 GO:000582 GO:0001228 DNA-binding transcription activator activity; GO:0001228 (sce00012) (sce00012)

|                         |                                  |           |            |            |                                                                   |
|-------------------------|----------------------------------|-----------|------------|------------|-------------------------------------------------------------------|
| ferrochelatase          | Ferrochelatase                   | G0:000674 | G0:000574  | G0:000432  | (sce00860)Porphyrin and chlorophyll metabolism                    |
| None                    | None                             | None      | None       | None       | None                                                              |
| hypothetical protein    | Protein                          | G0:005511 | G0:000565  | G0:0016491 | oxidoreductase activity;G0:0003824 catalytic activity             |
| Haalp                   | Transcription factor             | G0:00614  | G0:000565  | G0:0005507 | copper ion binding;G0:0000978 RNA polymerase activity             |
| ribosomal               | Ribosomal                        | G0:00004  | G0:002262  | G0:000375  | (sce03010)Ribosome                                                |
| Tho2p                   | Subunit                          | G0:20012  | G0:00004   | G0:000372  | (sce03040)Spliceosome; (sce03013)RNA transport                    |
| mitochondrial           | Mitochondrial                    | G0:00325  | G0:000574  | G0:0003735 | structural constituent of ribosome;G0:0005                        |
| mRNA                    | spliceosome                      | G0:00003  | G0:00710   | G0:0000384 | first spliceosomal transesterification activity                   |
| UDP-N-acetylglucosamine | UDP-N-acetylglucosamine          | G0:00060  | G0:000565  | G0:000397  | (sce00520)Amino sugar and nucleotide sugar metabolism             |
| Dal81p                  | Positive transcription factor    | G0:19017  | G0:000565  | G0:0001135 | RNA polymerase II transcription regulator activity                |
| N-acetylglucosamine     | ER membrane protein              | G0:00065  | G0:000574  | G0:000022  | (sce)GPI-anchor biosynthesis, core oligosaccharide biosynthesis   |
| glutamate               | Mitochondrial                    | G0:00701  | G0:000574  | G0:005056  | (sce00860)Porphyrin and chlorophyll metabolism                    |
| Yip3p                   | Protein localized to the vacuole | G0:00301  | G0:0003674 |            | molecular_function                                                |
| cleavage                | Essential                        | G0:00308  | G0:000582  | G0:000372  | (sce03015)mRNA surveillance pathway                               |
| putative                | Plasma membrane protein          | G0:00068  | G0:000574  | G0:0015123 | acetate transmembrane transporter activity                        |
| hypothetical protein    | Protein                          | G0:00081  | G0:000582  | G0:0043022 | ribosome binding;G0:0043021 ribonucleoprotein complex             |
| condensing              | Subunit                          | G0:19033  | G0:00007   | G0:000368  | (sce04111)Cell cycle - yeast                                      |
| hypothetical protein    | Protein                          | G0:00081  | G0:000557  | G0:0003674 | molecular_function                                                |
| U4/U6-U5                | Splicing                         | G0:00003  | G0:00465   | G0:000367  | (sce03040)Spliceosome                                             |
| Mmt2p                   | Putative                         | G0:00068  | G0:00319   | G0:0008324 | cation transmembrane transporter activity;G0:0008324              |
| hypothetical protein    | Protein                          | G0:00081  | G0:000557  | G0:0003674 | molecular_function                                                |
| Ecm32p                  | DNA dependent                    | G0:00064  | G0:00104   | G0:0004004 | ATP-dependent RNA helicase activity;G0:0004004                    |
| Mon2p                   | Protein                          | G0:00068  | G0:00319   | G0:0005085 | guanyl-nucleotide exchange factor activity                        |
| alpha-1,6               | Subunit                          | G0:00064  | G0:00001   | G0:000000  | (sce)N-glycan biosynthesis, high-mannose type                     |
| RNA exonuclease         | Protein                          | G0:00905  | G0:000565  | G0:0004521 | endoribonuclease activity;G0:0004527 exonuclease activity         |
| glycosyltransferase     | Alpha 1,2                        | G0:00062  | G0:000574  | G0:000458  | (sce00563)Glycosylphosphatidylinositol (GPI) biosynthesis         |
| transcription factor    | Meiosis-specific                 | G0:00459  | G0:000022  | G0:004356  | (sce04113)Meiosis - yeast                                         |
| Rad14p                  | Protein                          | G0:19012  | G0:00001   | G0:000368  | (sce03420)Nucleotide excision repair                              |
| transport               | Component                        | G0:00344  | G0:19900   | G0:0017112 | Rab guanyl-nucleotide exchange factor activity                    |
| Fe-S cluster            | Essential                        | G0:00000  | G0:00306   | G0:0043024 | ribosomal small subunit binding;G0:0003743                        |
| putative                | Putative                         | G0:00060  | G0:000557  | G0:0018456 | aryl-alcohol dehydrogenase (NAD+) activity                        |
| Erp3p                   | Protein                          | G0:00066  | G0:00301   | G0:0003674 | molecular_function                                                |
| Mg (2+)                 | transmembrane protein            | G0:00109  | G0:000582  | G0:0015095 | magnesium ion transmembrane transporter activity                  |
| RNA-processing          | Subunit                          | G0:00987  | G0:000582  | G0:000372  | (sce03015)mRNA surveillance pathway                               |
| rRNA-processing         | Component                        | G0:00004  | G0:00306   | G0:0003674 | molecular_function                                                |
| oleate-acyl-CoA         | Autoregulated                    | G0:00614  | G0:00897   | G0:0000978 | RNA polymerase II proximal promoter sequence                      |
| 5-oxopropyl             | 5-oxopropyl                      | G0:00067  | G0:000582  | G0:001716  | (sce00480)Glutathione metabolism                                  |
| Slg1p                   | Sensor-transducer                | G0:00302  | G0:00433   | G0:000488  | (sce04139)Mitophagy - yeast; (sce04011)MAPK signaling             |
| Yip5p                   | Protein                          | G0:00161  | G0:000574  | G0:0017137 | Rab GTPase binding;G0:0017016 Ras GTPase binding                  |
| AAA family              | Mitochondrial                    | G0:00301  | G0:000574  | G0:0004222 | metalloendopeptidase activity;G0:0008237 metalloprotease activity |
| Ecm15p                  | Non-essential                    | G0:00081  | G0:000582  | G0:0003674 | molecular_function                                                |
| translation             | Translation                      | G0:00340  | G0:00162   | G0:003136  | (sce03013)RNA transport                                           |
| None                    | None                             | None      | None       | None       | None                                                              |
| CCR4-NOT                | Heterotrimeric                   | G0:00066  | G0:000582  | G0:0051082 | unfolded protein binding;G0:0005515 protein binding               |
| Pex27p                  | Peripheral                       | G0:00070  | G0:000574  | G0:0003674 | molecular_function                                                |
| DNA replication         | DNA replication                  | G0:19029  | G0:00711   | G0:00431   | (sce04111)Cell cycle - yeast; (sce04113)Meiosis                   |
| pseudouridine           | Pseudouridine                    | G0:00004  | G0:00314   | G0:000998  | (sce03008)Ribosome biogenesis in eukaryotes                       |
| proteasome              | Beta 3 subunit                   | G0:00104  | G0:00345   | G0:00611   | (sce03050)Proteasome                                              |
| Rcy1p                   | F-box protein                    | G0:00344  | G0:00001   | G0:0000149 | SNARE binding;G0:0005515 protein binding;G0:0005515               |
| None                    | None                             | None      | None       | None       | None                                                              |
| Tri1p                   | Non-essential                    | G0:00081  | G0:000574  | G0:0003674 | molecular_function                                                |
| Mhf2p                   | Component                        | G0:00007  | G0:00718   | G0:0046982 | protein heterodimerization activity;G0:000                        |
| Psy4p                   | Regulator                        | G0:20000  | G0:00302   | G0:0019888 | protein phosphatase regulator activity;G0:0019888                 |
| glycerol-3-phosphate    | Mitochondrial                    | G0:00061  | G0:00313   | G0:00525   | (sce00564                                                         |

carbamoyl Large subunit GO:000655 GO:000595 GO:000408 (sce)Uridine monophosphate biosynthesis, glu  
 Atclp Nuclear protein GO:000712 GO:000565 GO:0003674 molecular\_function  
 putative Component GO:000041 GO:000565 GO:0003755 peptidyl-prolyl cis-trans isomerase activi  
 Narlp Subunit GO:001622 GO:009736 GO:0008901 ferredoxin hydrogenase activity; GO:0016699  
 aspartyl Cytosolic GO:000655 GO:000032 GO:0070006 metalloaminopeptidase activity; GO:0004177  
 Gprlp Plasma membrane GO:000975 GO:000588 GO:000555 (sce04213)Longevity regulating pathway - mul  
 glycine Cytosolic GO:001926 GO:004335 GO:007090 (sce)Cl-unit interconversion, eukaryotes; (M  
 Csm2p Component GO:000075 GO:009719 GO:0003674 molecular\_function  
 hypotheti Protein GO:000815 GO:001602 GO:0003674 molecular\_function  
 ribosomal Protein GO:000046 GO:002262 GO:000375 (sce03010)Ribosome  
 MRX complex Subunit GO:003207 GO:003087 GO:000401 (sce03450)Non-homologous end-joining; (sce03  
 ATP-binding Putative GO:003537 GO:000575 GO:0008559 xenobiotic transmembrane transporting ATPa  
 None None None None None None  
 Wwmlp WW domain GO:000691 GO:000575 GO:0003674 molecular\_function  
 Mkslp Pleiotropic GO:200022 GO:000565 GO:0003674 molecular\_function  
 Ahalp Co-chaperonin GO:003275 GO:000575 GO:0001671 ATPase activator activity; GO:0060590 ATPas  
 None None None None None None  
 Mcml6p Component GO:003408 GO:000077 GO:0003674 molecular\_function  
 None None None None None None  
 N-acetylglucosaminyl Component GO:000645 GO:004354 GO:000457 (sce)N-glycan precursor biosynthesis; (M00051  
 Csn9p Subunit GO:000075 GO:000818 GO:0003674 molecular\_function  
 chorismat Chorismat GO:000905 GO:000565 GO:000410 (M00024)Phenylalanine biosynthesis, chorisma  
 riboflavin Riboflavin GO:000922 GO:000557 GO:000474 (sce00740)Riboflavin metabolism; (sce01110)B  
 mannosyl Subunit GO:000005 GO:000015 GO:000000 (sce)N-glycan biosynthesis, high-mannose typ  
 Hcmlp Forkhead GO:005133 GO:000079 GO:0000981 DNA-binding transcription factor activity,  
 Hms2p Protein GO:006144 GO:000565 GO:0000978 RNA polymerase II proximal promoter sequen  
 None None None None None None  
 isocitrat Isocitrat GO:000605 GO:000577 GO:004642 (M00012)Glyoxylate cycle; (sce)Glyoxylate cy  
 Ypplp Cargo-transporter GO:000662 GO:003047 GO:0043022 ribosome binding; GO:0043021 ribonucleoprote  
 sulfite Sulfite reductase GO:001934 GO:000935 GO:005031 (M00176)Assimilatory sulfate reduction, sulfi  
 bifunctional Serine-thiolase GO:003625 GO:19906 GO:000452 (sce04141)Protein processing in endoplasmic r  
 FMN adenyl Flavin adenylase GO:000674 GO:000575 GO:000391 (sce00740)Riboflavin metabolism; (sce01110)B  
 Avt4p Vacuolar ATPase GO:003297 GO:199081 GO:001518 (sce04138)Autophagy - yeast  
 Atg38p Homodimeric GO:001622 GO:003427 GO:000519 (sce04138)Autophagy - yeast  
 oxysterol Protein GO:003472 GO:000032 GO:0008142 oxysterol binding; GO:0015248 sterol transp  
 None None None None None None  
 Tim12p Essential GO:004505 GO:004272 GO:0008320 protein transmembrane transporter activity  
 She9p Protein GO:000700 GO:000574 GO:0003674 molecular\_function  
 chitin synthase Chitin synthase GO:003422 GO:004500 GO:000410 (sce00520)Amino sugar and nucleotide sugar m  
 RNA exonuclease RNA exonuclease GO:003447 GO:000565 GO:0000175 3'-5'-exoribonuclease activity; GO:0016896  
 Mdmlp PtdIns-3-OH kinase GO:199085 GO:007156 GO:0032266 phosphatidylinositol-3-phosphate binding; G  
 Iwrlp RNA polymerase GO:000666 GO:000565 GO:0005515 protein binding; GO:0005488 binding; GO:0003  
 Ncw2p Structural GO:003155 GO:000927 GO:0005199 structural constituent of cell wall; GO:000  
 mitophagy Mitochondrial GO:003195 GO:003133 GO:000367 (sce04139)Mitophagy - yeast  
 bifunctional Glycerol-3-phosphate GO:001602 GO:003017 GO:001628 (sce00561)Glycerolipid metabolism; (sce00564  
 Haplp Zinc finger GO:006142 GO:000575 GO:0000978 RNA polymerase II proximal promoter sequen  
 Monlp Subunit GO:004435 GO:003258 GO:001031 (sce04138)Autophagy - yeast  
 tubulin-tubulin Subunit GO:003296 GO:001627 GO:0051087 chaperone binding; GO:0051082 unfolded prot  
 ketol-acetyl Acetylcholinesterase GO:000905 GO:004264 GO:000445 (sce)Valine/isoleucine biosynthesis, pyruvate  
 Slk19p Kinetochore GO:009865 GO:000077 GO:000367 (sce04111)Cell cycle - yeast; (sce04113)Meio  
 chromatid S-phase GO:004847 GO:003129 GO:000367 (sce04111)Cell cycle - yeast  
 Chl1p Probable GO:003408 GO:000079 GO:0004003 ATP-dependent DNA helicase activity; GO:000  
 Mak3lp Non-catalytic GO:000647 GO:003141 GO:0004596 peptide alpha-N-acetyltransferase activity  
 Ent4p Protein GO:000014 GO:003047 GO:0030276 clathrin binding; GO:0005515 protein bindin

|           |           |                                                                           |
|-----------|-----------|---------------------------------------------------------------------------|
| glucosami | Protein   | iGO:00065(GO:00057(GO:003221(sce)GPI-anchor biosynthesis, core oligosaccl |
| rRNA-proc | Endonucle | G0:00004(GO:00306(GO:0004519 endonuclease activity;G0:0004518 nuclease    |
| putative  | Putative  | G0:00156(GO:00057(GO:0052851 ferric-chelate reductase (NADPH) activity;G  |
| None      | None      | None                                                                      |
| None      | None      | None                                                                      |
| None      | None      | None                                                                      |
| 5-aminol  | 5-aminol  | G0:00067(GO:00057(GO:000387(sce00860)Porphyrin and chlorophyll metaboli   |
| thiosulf  | Rhodanes  | G0:00021(GO:00057(GO:00047(sce04122)Sulfur relay system; (sce00920)Sul    |
| Tos6p     | Glycosyl  | G0:00081(GO:00092(GO:0003674 molecular_function                           |
| Snglp     | Protein   | iGO:00610(GO:00003(GO:0003674 molecular_function                          |
| serine/th | Ser/Thr   | rGO:19033(GO:00057(GO:0004674 protein serine/threonine kinase activity;G  |
| Rab famil | Stress-ir | G0:00068(GO:00057(GO:0003924 GTPase activity;G0:0005525 GTP binding;G0:   |
| hypotheti | Putative  | G0:00081(GO:00055(GO:0003674 molecular_function                           |
| Pho88p    | Protein   | involved in SRP-independent targeting of substrates to the ER; component  |
| Ran guan  | Nucleoti  | cG0:00064(GO:00007(GO:0005087 Ran guanyl-nucleotide exchange factor acti  |
| hypotheti | Putative  | G0:00081(GO:00057(GO:0003674 molecular_function                           |
| Atg39p    | Autophagy | G0:00617(GO:00340(GO:0030674 protein binding, bridging;G0:0060090 molec   |
| Rrp9p     | Protein   | iGO:00001(GO:00314(GO:0034511 U3 snoRNA binding;G0:0030515 snoRNA bindin  |
| putative  | Putative  | protein of unknown function; similar to phosphoserine phosphatases; gre   |
| exportin  | Major kar | G0:00000(GO:00058(GO:00050(sce03008)Ribosome biogenesis in eukaryotes;    |
| ATP-deper | Mitochon  | cG0:00320(GO:00057(GO:0043140 ATP-dependent 3'-5' DNA helicase activity;G |
| Lhplp     | RNA bindi | G0:00080(GO:00057(GO:0000049 tRNA binding;G0:0003723 RNA binding;G0:000   |
| Bub3p     | Kinetoch  | cG0:00070(GO:19902(GO:00431(sce04111)Cell cycle - yeast                   |
| Sshlp     | Subunit   | cG0:00066(GO:00712(GO:00083(sce03060)Protein export; (sce04145)Phagosome  |
| drug-res  | Transcri  | pG0:20010(GO:00056(GO:0000978 RNA polymerase II proximal promoter sequen  |
| histone   | Subunit   | cG0:00165(GO:00327(GO:0004402 histone acetyltransferase activity;G0:0061  |
| Fir1p     | Protein   | iGO:00063(GO:0005935 cellular bud neck;G0:0005933 cellular bud;G0:003042  |
| hypotheti | Putative  | G0:00081(GO:00160(GO:0003674 molecular_function                           |
| hypotheti | Protein   | cG0:00421(GO:00055(GO:0004866 endopeptidase inhibitor activity;G0:006113  |
| Trs65p    | Component | G0:00512(GO:19900(GO:0017112 Rab guanyl-nucleotide exchange factor acti   |
| Mdm32p    | Mitochon  | cG0:00483(GO:00057(GO:0003674 molecular_function                          |
| exosome   | Exosome   | rGO:00710(GO:00001(GO:00170(sce03018)RNA degradation                      |
| Isd11p    | Cysteine  | G0:00162(GO:19902(GO:0031071 cysteine desulfurase activity;G0:0016783 s   |
| Sov1p     | Mitochon  | cG0:00081(GO:00057(GO:0003674 molecular_function                          |
| ubiquiti  | Subunit   | cG0:00719(GO:00319(GO:00431(sce04136)Autophagy - other; (sce04213)Longer  |
| Mtelp     | Protein   | cG0:00510(GO:00358(GO:0003674 molecular_function                          |
| DNA-bind  | 5'- and   | 3(GO:00007(GO:00056(GO:0070338 5'-flap-structured DNA binding;G0:0070337  |
| protein-  | Arginine  | G0:00464(GO:00056(GO:0019702 protein-arginine N5-methyltransferase acti   |
| hypotheti | Putative  | G0:00081(GO:00160(GO:0003674 molecular_function                           |
| Npl6p     | Component | G0:00063(GO:00165(GO:0015616 DNA translocase activity;G0:0008094 DNA-de   |
| syntaxin  | Endosomal | G0:00068(GO:00312(GO:00054(sce04130)SNARE interactions in vesicular tra   |
| ribosomal | Ribosomal | G0:00321(GO:00226(GO:00302(sce03010)Ribosome                              |
| Mehlp     | Component | G0:00070(GO:00719(GO:0003674 molecular_function                           |
| Fmp4lp    | Putative  | G0:00081(GO:00057(GO:00468(Human)(hsa00350)Tyrosine metabolism; (hsa01    |
| nucleosic | Nucleosic | G0:00092(GO:00056(GO:00088(sce00230)Purine metabolism; (sce01100)Metabo   |
| tyrosine  | Protein   | lGO:00106(GO:00059(GO:00047(sce04011)MAPK signaling pathway - yeast; (s   |
| Arf famil | Guanine   | rGO:00320(GO:00001(GO:00050(sce04144)Endocytosis                          |
| tRNA A64- | Initiator | G0:00199(GO:00057(GO:0043399 tRNA A64-2'-O-ribosylphosphate transferase   |
| Spplp     | Subunit   | cG0:19033(GO:00481(GO:0042800 histone methyltransferase activity (H3-K4   |
| hypotheti | Hydrophil | G0:00426(GO:00092(GO:0003674 molecular_function                           |
| None      | None      | None                                                                      |
| hypotheti | Putative  | G0:00081(GO:00055(GO:0003674 molecular_function                           |
| None      | None      | None                                                                      |
| None      | None      | None                                                                      |
| Bol2p     | Cytosolic | G0:00343(GO:00058(GO:0003674 molecular_function                           |
| Heh2p     | Inner nuc | G0:00081(GO:00056(GO:0003674 molecular_function                           |
| Fe-bindir | Protein   | rGO:00091(GO:00057(GO:0051537 2 iron, 2 sulfur cluster binding;G0:005153  |

Cmr1p Nuclear rG0:20000(G0:00343(G0:0003677 DNA binding;G0:0003676 nucleic acid binding;  
 pyridoxinProtein iG0:000861G0:19036(G0:00363(sce00750)Vitamin B6 metabolism  
 asparaginMitochondG0:00701(G0:00057(G0:000481(sce00970)Aminoacyl-tRNA biosynthesis  
 type 2C rMitochondG0:19041(G0:00057(G0:00047(sce04139)Mitophagy - yeast  
 hypothetiProtein cG0:00081(G0:00055G0:0003674 molecular\_function  
 1-phosphat1-phosphatG0:00468(G0:00707G0:00002(sce00562)Inositol phosphate metabolism; (sc  
 translocatEssentialG0:00450(G0:00427G0:0030943 mitochondrion targeting sequence binding;G  
 trifunctiCytoplasmG0:00092(G0:00057(G0:00044(sce)Cl-unit interconversion, eukaryotes; (M  
 Aim36p Protein cG0:00081(G0:00319(G0:0003674 molecular\_function  
 formin BFormin; rG0:00510(G0:00433(G0:00055(sce04011)MAPK signaling pathway - yeast  
 hypothetiPutative G0:00081(G0:00055G0:0003674 molecular\_function  
 seripaupMember ofG0:00315(G0:00092G0:0005199 structural constituent of cell wall;G0:000  
 serine/thMeiosis-sG0:00515(G0:00056G0:00046(sce04113)Meiosis - yeast  
 Rab GTPasEffector G0:00068(G0:00433(G0:0019905 syntaxin binding;G0:0017137 Rab GTPase bin  
 arginine-Arginyl-tG0:00064(G0:00057(G0:000481(sce00970)Aminoacyl-tRNA biosynthesis  
 Hkr1p Mucin fanG0:00072(G0:00304(G0:00050(sce04011)MAPK signaling pathway - yeast  
 Stn1p Telomere G0:00322(G0:19908G0:0043047 single-stranded telomeric DNA binding;G0:0  
 serine/thDNA damagG0:00092(G0:00058G0:00036(sce04111)Cell cycle - yeast; (sce04113)Meio  
 None None None None None None  
 U2 snRNP ComponentG0:00002(G0:00056G0:00036(sce03040)Spliceosome  
 Spg5p Protein rG0:00432(G0:00055G0:0070628 proteasome binding;G0:0044877 protein-cont  
 3'-5'-exc3'-->5' cG0:00063(G0:00057(G0:0008296 3'-5'-exodeoxyribonuclease activity;G0:001  
 dolichyl-Zeta subG0:00064(G0:0034998 oligos(M00072)N-glycosylation by oligosaccharyltra  
 None None None None None None  
 Pgalp EssentialG0:00065(G0:00315(G0:0000030 mannosyltransferase activity;G0:0016758 tr  
 origin reSubunit cG0:00062(G0:00056(G0:00036(sce04111)Cell cycle - yeast; (sce04113)Meio  
 hypothetiPutative G0:00086(G0:00056G0:0004733 pyridoxamine-phosphate oxidase activity;G0  
 mitochondMitochondG0:00701(G0:00057(G0:0003735 structural constituent of ribosome;G0:0005  
 cullin CICullin; sG0:00311(G0:00190(G0:00306(sce04120)Ubiquitin mediated proteolysis; (sc  
 Mmelp TransportG0:19906(G0:00057G0:0015095 magnesium ion transmembrane transporter ac  
 TFIIH/NEISubunit cG0:00708(G0:00056G0:00016(sce03022)Basal transcription factors; (sce0  
 None None None None None None  
 tetratricEssentialG0:00315(G0:00056G0:0003674 molecular\_function  
 Aly2p Alpha arG0:20003(G0:00057G0:0030674 protein binding, bridging;G0:0031625 ubiqu  
 Mdm20p Non-catalG0:00171(G0:00314(G0:0004596 peptide alpha-N-acetyltransferase activity  
 RNA methylTrimethylG0:00171(G0:00057(G0:00711(sce03013)RNA transport  
 Slf1p RNA bindiG0:00068G0:00104(G0:0003729 mRNA binding;G0:0003723 RNA binding;G0:000  
 tRNA (guatRNA(m(1)G0:00709(G0:00057(G0:0052906 tRNA (guanine(37)-N(1))-methyltransferase  
 18S rRNA MethyltraG0:00004(G0:00058G0:00700(sce03008)Ribosome biogenesis in eukaryotes  
 U4/U6-U5 Unique ccG0:00003(G0:00465G0:00036(sce03040)Spliceosome  
 Arc18p Subunit cG0:00343(G0:00058G0:00510(sce04144)Endocytosis  
 histone cHistone cG0:00071(G0:00059G0:0030332 cyclin binding;G0:0042393 histone binding;  
 6-phosph6-phosphG0:00061(G0:00058G0:00043(sce00051)Fructose and mannose metabolism  
 mitochondMitochondG0:00325G0:00057(G0:00037(sce03010)Ribosome  
 None None None None None None  
 None None None None None None  
 arginine-MitochondG0:00701(G0:00057(G0:000481(sce00970)Aminoacyl-tRNA biosynthesis  
 Dgr1p Protein cG0:00081(G0:00057(G0:0003674 molecular\_function  
 None None None None None None  
 mitochondMitochondG0:00325G0:00057(G0:0003735 structural constituent of ribosome;G0:0005  
 glutamateGamma-glG0:00551(G0:00058G0:00043(M00015)Proline biosynthesis, glutamate => p  
 salt homeSerine/thG0:00068G0:00198G0:00047(sce03015)mRNA surveillance pathway; (sce041  
 Bollp MitochondG0:00445G0:00057(G0:0003674 molecular\_function  
 RNA-deperProtein iG0:00004(G0:00057(G0:0004004 ATP-dependent RNA helicase activity;G0:000

mismatch Protein iGO:00071fGO:00323fGO:0000404 heteroduplex DNA loop binding;GO:0000405 b  
transcripTranscripGO:000111GO:00975fGO:00011f(sce03022)Basal transcription factors  
serine/thDual-specGO:00304fGO:00055fGO:0004712 protein serine/threonine/tyrosine kinase a  
Snu56p ComponentGO:00083fGO:00056fGO:0003723 RNA binding;GO:0003676 nucleic acid bindin  
putative Putative GO:000631GO:00056fGO:0004386 helicase activity;GO:0016887 ATPase activi  
Khalp Putative GO:00718(GO:00057fGO:0015386 potassium:proton antiporter activity;GO:00  
peptide cCatalyticGO:00171fGO:003141GO:0004596 peptide alpha-N-acetyltransferase activity  
Rrn9p Protein iGO:00427fGO:00005(GO:0001181 RNA polymerase I general transcription ini  
phosphoriPhosphoriGO:00001fGO:00057fGO:00046f(sce)Tryptophan biosynthesis, chorismate =>  
Usalp Scaffold GO:00324fGO:00008fGO:00329f(sce04141)Protein processing in endoplasmic  
Tsr4p CytoplasmGO:00304fGO:00057fGO:0003674 molecular\_function  
putative Putative GO:00193(GO:00056fGO:00047f(sce00030)Pentose phosphate pathway  
putative Protein cGO:00903(GO:00055fGO:0016888 endodeoxyribonuclease activity, producing  
hypothetiProtein cGO:00000fGO:00056fGO:0003676 nucleic acid binding;GO:1901363 heterocycl  
Pac1p Involved GO:19030fGO:00058fGO:00510f(sce00565)Ether lipid metabolism; (sce01100)  
Cmglp Putative GO:00081fGO:00007fGO:0003676 nucleic acid binding;GO:1901363 heterocycl  
aconitaterPutative GO:00198fGO:00057fGO:00039f(sce)Lysine biosynthesis, 2-oxoglutarate =>  
serine/thProtein lGO:00002fGO:00004(GO:0016887 ATPase activity;GO:0004674 protein serine/  
ribosomalRibosomalGO:00021fGO:00226fGO:00037f(sce03010)Ribosome  
Pug1p Plasma mGO:00353fGO:00003fGO:0003674 molecular\_function  
COMPASS cSubunit cGO:00063fGO:00481fGO:0042800 histone methyltransferase activity (H3-K4  
Mrx4p Protein tGO:00081fGO:00319fGO:0003674 molecular\_function  
protein tEssentialGO:00301fGO:00057fGO:0030943 mitochondrion targeting sequence binding;G  
putative Putative GO:00353fGO:00057fGO:0004725 protein tyrosine phosphatase activity;GO:0  
ATPase-biProtein iGO:00327fGO:00057fGO:0042030 ATPase inhibitor activity;GO:0060590 ATPas  
rRNA methHistone fGO:00004fGO:00314fGO:19902f(sce03008)Ribosome biogenesis in eukaryotes  
Cbp4p MitochonGO:00345fGO:00325fGO:0003674 molecular\_function  
Yet2p Protein cGO:00709fGO:00057fGO:0043022 ribosome binding;GO:0043021 ribonucleoprot  
gamma-gluGamma-gluGO:00067fGO:00056fGO:0061928 glutathione specific gamma-glutamylcyclotr  
J-type cSpecializGO:00445fGO:00057fGO:0001671 ATPase activator activity;GO:0060590 ATPas  
None None None None None None  
protein cCarboxy-tGO:00709fGO:00058fGO:0008420 RNA polymerase II CTD heptapeptide repeat  
ribosomalRibosomalGO:00021fGO:00226fGO:00037f(sce03010)Ribosome  
Cnm67p ComponentGO:00304fGO:0005824 outer plaque of spindle pole body;GO:0005816 spindl  
hypothetiPutative protein of unknown function; mCherry fusion protein localizes to the va  
None None None None None None  
deoxycytiDeoxycytiGO:00062fGO:00057fGO:00041f(sce00240)Pyrimidine metabolism; (sce01100)M  
None None None None None None  
hypothetiPutative GO:00081fGO:00160fGO:0003674 molecular\_function  
TFIIH/NEFSubunit cGO:007081GO:00056fGO:001031(sce03022)Basal transcription factors; (sce0  
Art5p Protein fGO:00700fGO:00058fGO:0031625 ubiquitin protein ligase binding;GO:004438  
Yaelp Protein tGO:01060fGO:00056fGO:0030674 protein binding, bridging;GO:0060090 molec  
rhomboid MitochonGO:00064fGO:00057fGO:0004252 serine-type endopeptidase activity;GO:0008  
Pdxlp E3-bindirGO:00060fGO:00059fGO:0016746 transferase activity, transferring acyl gr  
None None None None None None  
ATP-deperMitochonGO:19027fGO:00057fGO:1990400 mitochondrial ribosomal large subunit rRNA  
ribosomalProtein cGO:00004fGO:00226fGO:00701f(sce03010)Ribosome  
proline--Prolyl-tfGO:00064fGO:00171(GO:00048f(sce00970)Aminoacyl-tRNA biosynthesis  
Spo20p Meiosis-cGO:00313fGO:00056fGO:0005546 phosphatidylinositol-4,5-bisphosphate bind  
Arf familSshlp-SsGO:00312(GO:00712fGO:00154f(sce03060)Protein export; (sce04145)Phagosom  
hypothetiPutative GO:00081fGO:00160fGO:0003674 molecular\_function  
Gyplp Cis-golgiGO:00906fGO:00057fGO:0017137 Rab GTPase binding;GO:0005096 GTPase activ  
Yos9p ER qualiGO:00974fGO:00008fGO:00704f(sce04141)Protein processing in endoplasmic  
hypothetiPutative GO:00081fGO:00055fGO:0003674 molecular\_function

Emp65p Integral GO:003545;GO:003017;GO:0003674 molecular\_function  
 hypothetiNon-esser GO:000815;GO:000557;GO:0003674 molecular\_function  
 Hmolp Chromatin GO:000117;GO:003355;GO:0000400 four-way junction DNA binding;GO:0008301 D  
 myosin 4 Type V my GO:000755;GO:003194;GO:0000146 microfilament motor activity;GO:0003774 mo  
 Apl3p Alpha-ad GO:007255;GO:003012;GO:003561 (sce04144)Endocytosis  
 GPI-anchER membr GO:001625;GO:004276;GO:000392 (sce00563)Glycosylphosphatidylinositol (GPI)-  
 Ctolp Protein GO:000681;GO:000557;GO:0042131 thiamine phosphate phosphatase activity;GO  
 Coa4p Twin Cx GO:003361;GO:000575;GO:0003674 molecular\_function  
 Num1p Protein GO:003095;GO:000595;GO:0005543 phospholipid binding;GO:0008289 lipid bind  
 Srb8p Subunit GO:000041;GO:001655;GO:0003713 transcription coactivator activity;GO:0003  
 Avolp Component GO:00382(GO:003195;GO:0005546 phosphatidylinositol-4,5-bisphosphate bind  
 Cue2p Protein GO:000815;GO:000557;GO:0043130 ubiquitin binding;GO:0032182 ubiquitin-lik  
 cation tPlasma me GO:00600(GO:000585;GO:0015238 drug transmembrane transporter activity;GO  
 Fyv5p Protein GO:000075;GO:000561;GO:0003674 molecular\_function  
 Vps75p NAP famil GO:003506;GO:000075;GO:0010698 acetyltransferase activator activity;GO:00  
 Emc10p Putative GO:000815;GO:000575;GO:0003674 molecular\_function  
 sterol tSterol t GO:003236;GO:000032;GO:0003674 molecular\_function  
 B-type cyB-type cy GO:001065;GO:000003(GO:001655 (sce04011)MAPK signaling pathway - yeast; (s  
 transcriSubunit GO:004275;GO:000012;GO:0001002 RNA polymerase III type 1 promoter sequenc  
 Golgi trComponent GO:003225;GO:001711;GO:0003674 molecular\_function  
 U2 snRNP Protein GO:000024;GO:000565;GO:000367 (sce03040)Spliceosome  
 Spc97p Component GO:005141;GO:000092;GO:0051011 microtubule minus-end binding;GO:0043015 g  
 type 2C Cytoplasm GO:000647;GO:000575;GO:0004724 magnesium-dependent protein serine/threonine  
 seripaupMember of GO:00315(GO:000927;GO:0005199 structural constituent of cell wall;GO:000  
 Rsflp Protein GO:000635;GO:000575;GO:0003674 molecular\_function  
 protein lProtein GO:003215;GO:003216;GO:000465 (sce04933)AGE-RAGE signaling pathway in diab  
 Sps22p Protein GO:003047;GO:000927;GO:0003674 molecular\_function  
 RNA bindiRNA bindi GO:000046;GO:003142;GO:003062 (sce03040)Spliceosome; (sce03008)Ribosome bi  
 arginine Plasma me GO:190382;GO:003212;GO:0015181 arginine transmembrane transporter activit  
 Esc2p Sumo-like GO:003325;GO:000565;GO:0003674 molecular\_function  
 Atg40p Autophagy GO:00617(GO:003254;GO:0030674 protein binding, bridging;GO:0060090 molec  
 protein cComponent GO:004505;GO:000574;GO:0030943 mitochondrion targeting sequence binding;G  
 hypothetiPutative GO:000815;GO:000557;GO:0003674 molecular\_function  
 Pcl8p Cyclin; GO:004571;GO:000003(GO:0016538 cyclin-dependent protein serine/threonine  
 hypothetiPutative GO:000815;GO:001602;GO:0003674 molecular\_function  
 H/ACA snProtein GO:000045;GO:003142;GO:003451 (sce03008)Ribosome biogenesis in eukaryotes  
 ribosomalProtein GO:000215;GO:001045;GO:000375 (sce03010)Ribosome  
 None None None None None None  
 COP9 sigCatalytic GO:007045;GO:000815;GO:0019784 NEDD8-specific protease activity;GO:001978  
 exocyst cExocyst GO:009055;GO:000562;GO:0003674 molecular\_function  
 None None None None None None  
 hypothetiDubious GO:000815;GO:000557;GO:0003674 molecular\_function  
 Nbplp Spindle GO:007175;GO:000582;GO:0008289 lipid binding;GO:0005488 binding;GO:000367  
 None None None None None None  
 bifuncticUDP-gluc GO:003345;GO:000582;GO:000397 (sce)Galactose degradation, Leloir pathway, ;  
 None None None None None None  
 Utp14p Subunit GO:000047;GO:003204;GO:000552 (sce03008)Ribosome biogenesis in eukaryotes  
 dolichyl-Dolichyl- GO:000645;GO:000575;GO:010607 (sce)N-glycan precursor biosynthesis; (M0005  
 Yoslp Integral GO:000685;GO:003017;GO:0003674 molecular\_function  
 None None None None None None  
 hypothetiPutative GO:000815;GO:000557;GO:0003674 molecular\_function  
 peptide cSubunit GO:000647;GO:003141;GO:0004596 peptide alpha-N-acetyltransferase activity  
 None None None None None None  
 autophagyAdapter GO:006175;GO:199031;GO:003294 (sce04136)Autophagy - other; (sce04139)Mitopl



hypothetiProtein cGO:00081fGO:00058fGO:0043022 ribosome binding;GO:0043021 ribonucleoprot  
 hypothetiPutative GO:00081fGO:00055fGO:0003674 molecular\_function  
 Aim1lp Protein cGO:00081fGO:00057fGO:0003674 molecular\_function  
 CCR4-NOT ComponentGO:00310fGO:00300fGO:00048f(sce03018)RNA degradation  
 putative Protein cGO:19905fGO:00306fGO:0005458 GDP-mannose transmembrane transporter acti  
 Kellp Protein rGO:00903fGO:19906fGO:0003674 molecular\_function  
 Duflp UbiquitinrGO:19030fGO:00057fGO:0043130 ubiquitin binding;GO:0032182 ubiquitin-lik  
 hypothetiPutative GO:00081fGO:00055fGO:0003674 molecular\_function  
 bifuncticEthanolanGO:00066fGO:00057fGO:00043f(sce)Phosphatidylethanolamine (PE) biosynthe  
 dolichyl-Alpha suGO:00182fGO:00057fGO:00045f(M00072)N-glycosylation by oligosaccharyltra  
 Pml39p Protein rGO:00512fGO:00319fGO:0043022 ribosome binding;GO:0043021 ribonucleoprot  
 tRNA ligatRNA ligGO:00320fGO:00056fGO:0051730 GTP-dependent polyribonucleotide 5'-hydrox  
 Shelp Mitotic sGO:20005fGO:00058fGO:0008017 microtubule binding;GO:0015631 tubulin bin  
 origin reSubunit cGO:00319fGO:00056fGO:00036f(sce04111)Cell cycle - yeast; (sce04113)Meio  
 Arf familADP-ribosGO:00068fGO:00057fGO:00039f(sce04144)Endocytosis  
 Hal9p Putative GO:00096fGO:00057fGO:0000981 DNA-binding transcription factor activity,  
 tRNA:m4X 2'-O-metGO:00304fGO:00056fGO:0106050 tRNA 2'-O-methyltransferase activity;GO:00  
 Inlp PeripherGO:00450fGO:00057fGO:0030674 protein binding, bridging;GO:0060090 molec  
 DEAD-box RNA helicGO:00003fGO:00056fGO:00081f(sce03040)Spliceosome  
 tRNA 1-mcSubunit cGO:00304fGO:00315fGO:0016429 tRNA (adenine-N1-)-methyltransferase activ  
 Mmslp Subunit cGO:00706fGO:00353fGO:0003674 molecular\_function  
 Bni4p TargetingGO:00060fGO:00321fGO:0005515 protein binding;GO:0005488 binding;GO:0003  
 Mdy2p Protein iGO:00007fGO:00723fGO:0043023 ribosomal large subunit binding;GO:0043024  
 Ruplp Protein tGO:19024fGO:00056fGO:0005515 protein binding;GO:0005488 binding;GO:0003  
 None None None None None None  
 hypothetiProtein cGO:00512fGO:00057fGO:0003674 molecular\_function  
 ribose p5-phosphGO:00060fGO:00021fGO:00047f(M00005)PRPP biosynthesis, ribose 5P => PRPP  
 Erj5p Type I mcGO:00064fGO:00057fGO:0003674 molecular\_function  
 Tahlp ComponentGO:00004fGO:00972fGO:0051087 chaperone binding;GO:0005515 protein bindi  
 putative Positive GO:00064fGO:00226fGO:0016887 ATPase activity;GO:0017111 nucleoside-trip  
 dihydroxyDihydroxyGO:00090fGO:00057fGO:00041f(sce)Valine/isoleucine biosynthesis, pyruvate  
 hydrolaseSteryl-bGO:19044fGO:00003fGO:0050295 steryl-beta-glucosidase activity;GO:000842  
 Tir3p Cell wallGO:00315fGO:00092fGO:0005199 structural constituent of cell wall;GO:000  
 putative Putative GO:00081fGO:00057fGO:0034459 ATP-dependent 3'-5' RNA helicase activity;  
 Nfslp Cysteine GO:00709fGO:19902fGO:00310f(sce04122)Sulfur relay system; (sce00730)Thi  
 chromatirATPase sGO:00708fGO:00364fGO:0000182 rDNA binding;GO:0031491 nucleosome binding  
 Fun19p Non-esserGO:00350fGO:00704fGO:0004402 histone acetyltransferase activity;GO:0061  
 protein rPutative GO:0005979 regulaGO:0019888 protein phosphatase regulator activity;GO:0  
 Pex29p ER-resideGO:00325fGO:00057fGO:0003674 molecular\_function  
 Biklp MicrotubuGO:00007fGO:00353fGO:0008017 microtubule binding;GO:0015631 tubulin bin  
 mRNA-bincTranslatiGO:20007fGO:00104fGO:0045182 translation regulator activity;GO:0003697  
 ATP-deperMitochonGO:00063fGO:00057fGO:0033592 RNA strand annealing activity;GO:0004004 A  
 None None None None None None  
 pyruvate E1 beta sGO:00060fGO:00059fGO:00047f(M00307)Pyruvate oxidation, pyruvate => acet  
 Somlp Subunit cGO:00331fGO:00427fGO:0004175 endopeptidase activity;GO:0070011 peptidas  
 Kip2p Kinesin-rGO:00070fGO:19037fGO:0008574 ATP-dependent microtubule motor activity,  
 Ciklp Kinesin-rGO:00007fGO:00058fGO:0008569 ATP-dependent microtubule motor activity,  
 ribosomalProtein cGO:00021fGO:00226fGO:00037f(sce03010)Ribosome  
 None None None None None None  
 Pex17p Membrane GO:00165fGO:19904fGO:0005515 protein binding;GO:0005488 binding;GO:0003  
 Svl3p Protein cGO:00068fGO:00059fGO:0016491 oxidoreductase activity;GO:0003824 catalyt  
 hypothetiPutative GO:00081fGO:00056fGO:0003674 molecular\_function  
 None None None None None None  
 hypothetiPutative GO:00081fGO:00055fGO:0003674 molecular\_function

purine-cyPurine-cyGO:001586GO:000032GO:0015212 cytidine transmembrane transporter activity  
 cytidine Cytidine GO:000621GO:000582GO:000412 (sce00240)Pyrimidine metabolism; (sce01100)M  
 Fhnlp Protein cGO:007094GO:003212GO:0003674 molecular\_function  
 Makllp Protein iGO:000046GO:003196GO:0003674 molecular\_function  
 Sphlp Protein iGO:003136GO:190271GO:0005078 MAP-kinase scaffold activity;GO:0035591 si  
 E3 ubiquiE3 ubiquiGO:004227GO:00975(GO:0043142 single-stranded DNA-dependent ATPase activ  
 glycosylGlycosylGO:00065(GO:199052GO:000003 (sce)GPI-anchor biosynthesis, core oligosaccl  
 hypothetiPutative GO:000686GO:003016GO:0003674 molecular\_function  
 ribosylNiNicotinamGO:003436GO:000032GO:005026 (sce00760)Nicotinate and nicotinamide metabo  
 hypothetiPutative GO:000816GO:000557GO:0003674 molecular\_function  
 hypothetiPutative GO:001576GO:000032GO:0005366 myo-inositol:proton symporter activity;GO:  
 None None None None None None  
 amino aciProtein iGO:001581GO:000032GO:000367 (Human) (hsa04142)Lysosome  
 Nmd4p Protein iGO:000016GO:000556GO:0003674 molecular\_function  
 decappingNuclear iGO:007106GO:000582GO:1990174 phosphodiesterase decapping endonuclease a  
 None None None None None None  
 hypothetiPutative GO:000816GO:000557GO:0003674 molecular\_function  
 Mps2p EssentialGO:007196GO:000581GO:0005198 structural molecule activity;GO:0003674 mo  
 adenylateCAP (cyclGO:003086GO:003047GO:0008179 adenylate cyclase binding;GO:0003779 actin  
 None None None None None None  
 Brplp Putative GO:000816GO:000557GO:0003674 molecular\_function  
 Mpa43p Protein cGO:000597GO:000576GO:0016773 phosphotransferase activity, alcohol group  
 TATA-bincTATA-bincGO:000116GO:000566GO:000116 (sce03022)Basal transcription factors  
 None None None None None None  
 hypothetiPutative GO:000816GO:001602GO:0003674 molecular\_function  
 Rrp7p EssentialGO:000002GO:003446GO:000367 (sce03008)Ribosome biogenesis in eukaryotes  
 hypothetiPutative GO:000816GO:000576GO:0003674 molecular\_function  
 None None None None None None  
 Ypq2p Putative GO:003446GO:007162GO:0015174 basic amino acid transmembrane transporter  
 syntaxin Plasma mGO:003132GO:000562GO:007030 (sce04130)SNARE interactions in vesicular tra  
 SPX domaiLow-affirGO:200016GO:000586GO:0005315 inorganic phosphate transmembrane transpor  
 Suslp ComponentGO:007106GO:000012GO:0003713 transcription coactivator activity;GO:0008  
 SNAP receEssentialGO:004827GO:007146GO:000546 (sce04130)SNARE interactions in vesicular tra  
 Tpnlp Plasma mGO:003191GO:000032GO:0031924 vitamin B6 transmembrane transporter activ  
 hypothetiPutative GO:003567GO:000032GO:0035673 oligopeptide transmembrane transporter act  
 Mhflp ComponentGO:000071GO:007182GO:0046982 protein heterodimerization activity;GO:000  
 seripaupProtein cGO:00315(GO:000927GO:0005199 structural constituent of cell wall;GO:000  
 pseudouriMitochoncGO:000046GO:000576GO:0106029 tRNA pseudouridine synthase activity;GO:00  
 None None None None None None  
 Hutlp Protein vGO:001576GO:003017GO:0005460 UDP-glucose transmembrane transporter acti  
 Jjj3p Protein cGO:001716GO:000566GO:0008198 ferrous iron binding;GO:0005506 iron ion b  
 Farllp Protein iGO:000032GO:000016GO:0003674 molecular\_function  
 Ran GTPasNuclear cGO:00066(GO:004461GO:0008536 Ran GTPase binding;GO:0008565 protein tran  
 cruciformMitochoncGO:00000(GO:000576GO:0000402 crossed form four-way junction DNA binding  
 alpha-1,2Alpha1,2-GO:000003GO:000032GO:000002 (sce00514)Other types of O-glycan biosynthes  
 phosphoirPhosphatiGO:004686GO:003047GO:004381 (sce00562)Inositol phosphate metabolism; (sc  
 kinetochoComponentGO:000706GO:0031262 Ndc80 complex;GO:0000778 condensed nuclear chromoso  
 None None None None None None  
 methionirMethionylGO:000646GO:00171(GO:000482 (sce00450)Selenocompound metabolism; (sce009  
 fatty aciMitochoncGO:000666GO:000576GO:000431 (sce)Fatty acid biosynthesis, elongation; (M  
 hypothetiProtein cGO:000816GO:000557GO:0003674 molecular\_function  
 oxysterolOne of seGO:003566GO:000016GO:0008142 oxysterol binding;GO:0070273 phosphatidyli  
 Fmp32p Putative GO:003361GO:000576GO:0003674 molecular\_function  
 Smc5-Smc6ComponentGO:00063(GO:003091GO:0019789 SUMO transferase activity;GO:0004842 ubiqu

|                          |                          |          |          |            |                                                           |
|--------------------------|--------------------------|----------|----------|------------|-----------------------------------------------------------|
| ribosomal                | Ribosomal                | G0:00004 | G0:00306 | G0:00198   | (sce03010) Ribosome                                       |
| acid phosphatase         | Acid phosphatase         | G0:00323 | G0:00056 | G0:0003993 | acid phosphatase activity;G0:0016791 phosphatase activity |
| None                     | None                     | None     | None     | None       | None                                                      |
| hypothetical             | Putative                 | G0:00081 | G0:00160 | G0:0047372 | acylglycerol lipase activity;G0:0016298 lipase activity   |
| profilin                 | Profilin                 | G0:00903 | G0:00198 | G0:0005546 | phosphatidylinositol-4,5-bisphosphate binding             |
| hypothetical             | Protein                  | G0:00081 | G0:00057 | G0:0003674 | molecular_function                                        |
| mRNA-binding             | Poly(A+)                 | G0:20008 | G0:00710 | G0:0003729 | mRNA binding;G0:0003723 RNA binding;G0:0003723            |
| chaperonin               | Subunit                  | G0:00064 | G0:00058 | G0:0051082 | unfolded protein binding;G0:0005524 ATP binding           |
| New1p                    | ATP binding              | G0:00169 | G0:00306 | G0:0016887 | ATPase activity;G0:0003729 mRNA binding;G0:0003729        |
| lipoyl                   | Lipoyl                   | G0:00092 | G0:00057 | G0:01025   | (sce00785) Lipoic acid metabolism; (sce01100) lipoic acid |
| Hop1p                    | Meiosis                  | G0:00515 | G0:00008 | G0:00004   | (sce04113) Meiosis - yeast                                |
| Abp1p                    | Actin-binding            | G0:20006 | G0:00304 | G0:0051015 | actin filament binding;G0:0003779 actin binding           |
| ribosomal                | Ribosomal                | G0:00021 | G0:00226 | G0:00037   | (sce03010) Ribosome                                       |
| Dml1p                    | Essential                | G0:00062 | G0:00057 | G0:0003674 | molecular_function                                        |
| Sps2p                    | Protein                  | G0:00304 | G0:00092 | G0:0003674 | molecular_function                                        |
| hypothetical             | Putative                 | G0:00081 | G0:00056 | G0:0003674 | molecular_function                                        |
| hypothetical             | Putative                 | G0:00065 | G0:00003 | G0:00046   | (sce00563) Glycosylphosphatidylinositol (GPI) anchor      |
| ammonium                 | Ammonium                 | G0:00724 | G0:00058 | G0:0008519 | ammonium transmembrane transporter activity               |
| glucose                  | Subunit                  | G0:00457 | G0:00346 | G0:0003674 | molecular_function                                        |
| Erv29p                   | Protein                  | G0:00301 | G0:00970 | G0:0020    | COPII adaptor activity;G0:0030674 protein                 |
| Spc19p                   | Essential                | G0:00519 | G0:00427 | G0:0051010 | microtubule plus-end binding;G0:0008017 microtubule       |
| Rad4p                    | Protein                  | G0:00062 | G0:00001 | G0:19901   | (sce03420) Nucleotide excision repair                     |
| hypothetical             | Putative                 | G0:00081 | G0:00160 | G0:0003674 | molecular_function                                        |
| hypothetical             | Putative                 | G0:00081 | G0:00055 | G0:0003674 | molecular_function                                        |
| Lot5p                    | Protein                  | G0:00081 | G0:00056 | G0:0003674 | molecular_function                                        |
| Kei1p                    | Component                | G0:00066 | G0:00709 | G0:0070917 | inositol phosphoceramide synthase regulator               |
| mitochondrial            | Mitochondrial            | G0:00325 | G0:00057 | G0:00198   | (sce03010) Ribosome                                       |
| Lds1p                    | Protein                  | G0:00304 | G0:00056 | G0:0003674 | molecular_function                                        |
| None                     | None                     | None     | None     | None       | None                                                      |
| None                     | None                     | None     | None     | None       | None                                                      |
| aminophosphatase         | Aminophosphatase         | G0:00007 | G0:00708 | G0:0015662 | ATPase activity, coupled to transmembrane transport       |
| stress-response          | Stress-response          | G0:00972 | G0:00058 | G0:00009   | (sce04213) Longevity regulating pathway - multiple        |
| Rsc58p                   | Component                | G0:00063 | G0:00165 | G0:0015616 | DNA translocase activity;G0:0008094 DNA-dependent         |
| Scy1p                    | Putative                 | G0:00064 | G0:00301 | G0:0004672 | protein kinase activity;G0:0016773 phosphatase            |
| ribosomal                | Ribosomal                | G0:00021 | G0:00306 | G0:00198   | (sce03010) Ribosome                                       |
| None                     | None                     | None     | None     | None       | None                                                      |
| ribose                   | 5-phosphoribose          | G0:00060 | G0:00021 | G0:00047   | (M00005) PRPP biosynthesis, ribose 5P => PRPP             |
| Tda5p                    | Putative                 | G0:00424 | G0:00319 | G0:0016491 | oxidoreductase activity;G0:0003824 catalytic              |
| mRNA splicing            | Splicing                 | G0:00710 | G0:00710 | G0:00003   | (sce03040) Spliceosome                                    |
| hypothetical             | Putative                 | G0:00081 | G0:00160 | G0:0003674 | molecular_function                                        |
| Boi2p                    | Protein                  | G0:00071 | G0:00059 | G0:0005543 | phospholipid binding;G0:0008289 lipid binding             |
| Gts1p                    | Protein                  | G0:00105 | G0:00304 | G0:0070491 | repressing transcription factor binding;G0:0003779        |
| ribosomal                | Ribosomal                | G0:00321 | G0:00226 | G0:00302   | (sce03010) Ribosome                                       |
| myosin 5                 | One of two               | G0:20006 | G0:00304 | G0:0000146 | microfilament motor activity;G0:0003774 motor             |
| putative                 | Probable                 | G0:00109 | G0:00058 | G0:0015095 | magnesium ion transmembrane transporter activity          |
| None                     | None                     | None     | None     | None       | None                                                      |
| alanine                  | Alanine                  | G0:00065 | G0:00057 | G0:00040   | (sce00220) Arginine biosynthesis; (sce00250) Arginine     |
| Smc5-Smc6                | Component                | G0:00169 | G0:00309 | G0:0019789 | SUMO transferase activity;G0:0019787 ubiquitin            |
| None                     | None                     | None     | None     | None       | None                                                      |
| phosphatidylethanolamine | Phosphatidylethanolamine | G0:00066 | G0:00100 | G0:00046   | (M00093) Phosphatidylethanolamine (PE) biosynthesis       |
| None                     | None                     | None     | None     | None       | None                                                      |
| transcription            | Subunit                  | G0:00014 | G0:00466 | G0:0046982 | protein heterodimerization activity;G0:0003779            |
| ribosomal                | Protein                  | G0:00004 | G0:00226 | G0:00037   | (sce03010) Ribosome                                       |
| Rtc4p                    | Protein                  | G0:00081 | G0:00056 | G0:0003674 | molecular_function                                        |

hypothetiPutative GO:001991GO:000575GO:0035243 protein-arginine omega-N symmetric methylt  
 None None None None None None  
 NADH-ubiquinone reductase (cytochrome b557) activity; GO:000611GO:000574GO:0008137 NADH dehydrogenase (ubiquinone) activity; GO:000611GO:000574GO:0008137  
 Lcl3p Putative GO:009031GO:000575GO:0004519 endonuclease activity; GO:0004518 nuclease activity; GO:0004518  
 Maslp Beta subunit GO:000662GO:001708GO:0004222 metalloendopeptidase activity; GO:0008237 metallopeptidase activity; GO:0008237  
 Spc105p Subunit c GO:000709GO:000094GO:0008017 microtubule binding; GO:0015631 tubulin binding; GO:0015631  
 origin replication; GO:003331GO:000566GO:000368 (sce04111) Cell cycle - yeast; (sce04113) Meiosis  
 carnitine carnitine GO:000945GO:000582GO:000409 (sce04146) Peroxisome  
 translation of tRNA; GO:000644GO:001049GO:0003746 translation elongation factor activity; GO:0003746  
 mRNA-binding Ubiquitin GO:003451GO:199086GO:000484 (sce04139) Mitophagy - yeast  
 Netlp Core subunit GO:003105GO:003086GO:000018 (sce04111) Cell cycle - yeast  
 adenylate Adenylate GO:000617GO:000575GO:000401 (sce) Adenine ribonucleotide biosynthesis, IMU  
 hypothetiProtein c GO:000815GO:000575GO:0003674 molecular\_function  
 ribosomal Ribosomal GO:003214GO:002262GO:003029 (sce03010) Ribosome  
 alpha, alpha-Synthase GO:009044GO:000594GO:000382 (sce00500) Starch and sucrose metabolism; (sce00500)  
 ribosomal Ribosomal GO:004227GO:002262GO:000375 (sce03010) Ribosome  
 DNA helicase DNA helicase GO:004227GO:000078GO:0009378 four-way junction helicase activity; GO:0009378  
 mRNA-binding Component GO:000046GO:007054GO:0003729 mRNA binding; GO:0003723 RNA binding; GO:0003723  
 Ybplp Protein i GO:003455GO:000575GO:0003674 molecular\_function  
 ubiquitin Ubiquitin GO:007165GO:000566GO:0061630 ubiquitin protein ligase activity; GO:0061630  
 putative Mitochondrion GO:000662GO:000032GO:0022857 transmembrane transporter activity; GO:0005662  
 Agelp ADP-ribosylation GO:000688GO:000588GO:000509 (sce04144) Endocytosis  
 syntaxin Plasma membrane GO:003132GO:000562GO:004332 (sce04130) SNARE interactions in vesicular transport; (sce04130)  
 putative Protein v GO:000644GO:000575GO:000482 (sce00970) Aminoacyl-tRNA biosynthesis  
 phenylacetyl-CoA lyase Phenylacetyl-CoA lyase GO:004628GO:000575GO:010614 (sce00130) Ubiquinone and other terpenoid-quinone biosynthesis; (sce00130)  
 chromatin Chromatin GO:007144GO:004669GO:0070615 nucleosome-dependent ATPase activity; GO:0070615  
 Fsf1p Putative GO:005507GO:003196GO:0015075 ion transmembrane transporter activity; GO:003196  
 translocation Swi2/Snf2 GO:200105GO:000077GO:0032183 SUMO binding; GO:0008094 DNA-dependent ATPase activity; GO:0008094  
 Ecm7p Putative GO:007155GO:000032GO:0003674 molecular\_function  
 mitochondrion Mitochondrion GO:003254GO:000576GO:000375 (sce03010) Ribosome  
 Mlc1p Essential GO:000091GO:012015GO:0032038 myosin II heavy chain binding; GO:0045159 myosin heavy chain binding; GO:0045159  
 dolichyl-Mannosyltransferase GO:000644GO:000575GO:005291 (sce) N-glycan precursor biosynthesis; (M00052)  
 mRNA splicing Core Sm RNA GO:000035GO:000024GO:000372 (sce04139) Mitophagy - yeast; (sce03040) Splicing  
 ATP-binding Mitochondrion GO:009037GO:000574GO:001542 (Human) (hsa02010) ABC transporters  
 putative Putative GO:000706GO:000562GO:0003924 GTPase activity; GO:0005525 GTP binding; GO:0005525  
 mitogen-activated protein kinase signaling pathway MAPK signaling pathway - yeast  
 hypothetiPutative GO:000815GO:000588GO:0003674 molecular\_function  
 Rgrlp Subunit c GO:000012GO:007084GO:0001093 TFIIB-class transcription factor binding; GO:0001093  
 amidase Amidase; GO:003016GO:000575GO:0070773 protein-N-terminal glutamine amidohydrolase activity; GO:0070773  
 Gpglp Proposed GO:000141GO:0005737 cytoplasm; GO:0005622 intracellular; GO:0044424 intracellular  
 None None None None None None  
 Vtclp Regulator GO:000679GO:003325GO:0003729 mRNA binding; GO:0003723 RNA binding; GO:0003723  
 Hpmlp AdoMet-dependent GO:004205GO:000566GO:0018064 protein-histidine N-methyltransferase activity; GO:0018064  
 Tma46p Protein c GO:000215GO:000582GO:1905538 polysome binding; GO:0043021 ribonucleoprotein complex binding; GO:0043021  
 hypothetiProtein c GO:000716GO:000595GO:0003674 molecular\_function  
 Pet130p Protein i GO:000815GO:000575GO:0003674 molecular\_function  
 DNA-directed Catalytic GO:190295GO:000566GO:000388 (sce03030) DNA replication; (sce00240) Pyrimidine biosynthesis; (sce00240)  
 Arc15p Subunit c GO:003431GO:003131GO:005101 (sce04144) Endocytosis  
 tethering ATP-binding GO:005146GO:003326GO:003509 (sce04138) Autophagy - yeast  
 epsin Epsin-like GO:000014GO:004335GO:003027 (sce04144) Endocytosis  
 Trs120p Component GO:003445GO:199007GO:0017112 Rab guanyl-nucleotide exchange factor activity; GO:0017112  
 hypothetiPutative GO:000815GO:001602GO:0003674 molecular\_function  
 hypothetiPutative GO:000815GO:000575GO:0003674 molecular\_function  
 Trm82p Catalytic GO:010606GO:010614GO:0008176 tRNA (guanine-N7-)-methyltransferase activity; GO:0008176

hypotheticalProtein cGO:00081fGO:00433fGO:0043022 ribosome binding;GO:0043021 ribonucleoprotei  
 homeodomSilenced GO:00081fGO:00056fGO:00435f(sce04113)Meiosis – yeast  
 proteasom19S proteGO:00727fGO:00345fGO:00036f(sce03440)Homologous recombination; (sce0305  
 Arp4p Nuclear eGO:00513fGO:00352fGO:0043140 ATP-dependent 3'–5' DNA helicase activity;  
 cytoskelCytoskelGO:00343fGO:00304fGO:0098748 endocytic adaptor activity;GO:0043130 ubiqui  
 Itclp Subunit cGO:00460fGO:00007fGO:0003674 molecular\_function  
 hypotheticalER-localiGO:00081fGO:00057fGO:0003674 molecular\_function  
 histone cCytoplasmGO:00319fGO:00056fGO:00171f(sce00760)Nicotinate and nicotinamide metabo  
 oxysterolMember ofGO:00356fGO:00325fGO:0008142 oxysterol binding;GO:0005545 1-phosphatidy  
 Dal82p Positive GO:00010fGO:00056fGO:0043565 sequence-specific DNA binding;GO:0003700 D  
 ATP-bindSubunit cGO:00159fGO:00057fGO:00053f(sce02010)ABC transporters; (sce04146)Peroxi  
 Tmn2p Protein vGO:00014(GO:00003fGO:0003674 molecular\_function  
 None None None None None None  
 protein lMitochondGO:00159fGO:00057fGO:0004740 pyruvate dehydrogenase (acetyl-transferrin  
 putative Putative GO:19026fGO:00306fGO:0004004 ATP-dependent RNA helicase activity;GO:000  
 fumarate Fumarate GO:00464fGO:00057fGO:0016156 fumarate reductase (NADH) activity;GO:0000  
 protein lScaffold GO:00457fGO:01200fGO:00302f(sce04138)Autophagy – yeast  
 Tmn3p Protein vGO:00014(GO:00301fGO:0003674 molecular\_function  
 Atg12p UbiquitinGO:00617fGO:00342fGO:00197f(sce04136)Autophagy – other; (sce04138)Autopl  
 Vac17p PhosphopGO:00000fGO:00715fGO:0043495 protein membrane anchor;GO:0005515 protein  
 hypotheticalPutative GO:00081fGO:00057fGO:0003674 molecular\_function  
 ribosomalRibosomalGO:00004fGO:00226fGO:00037f(sce03010)Ribosome  
 Mtc4p Protein cGO:00081fGO:00058fGO:0003674 molecular\_function  
 Spo73p Meiosis-fGO:00321fGO:00056fGO:0003674 molecular\_function  
 ESCRT-II ComponentGO:00004fGO:00008fGO:00322f(sce04144)Endocytosis  
 Ldb7p ComponentGO:00063fGO:00165fGO:0015616 DNA translocase activity;GO:0008094 DNA-de  
 mRNA-bindNuclear fGO:19001fGO:00056fGO:0033204 ribonuclease P RNA binding;GO:0008097 5S r  
 exosome rExosome rGO:00710fGO:00001fGO:00170f(sce03018)RNA degradation  
 Vps72p Htz1p-birGO:00434fGO:00008fGO:0042393 histone binding;GO:0005515 protein binding  
 mitochondMitochondGO:00304fGO:00057fGO:00198f(sce03010)Ribosome  
 translatimRNA cap GO:00001fGO:00162fGO:00988f(sce03013)RNA transport  
 Mms4p Subunit cGO:00105fGO:00484fGO:0008821 crossover junction endodeoxyribonuclease a  
 CDP-diacyPhosphatiGO:00320fGO:00057fGO:00084f(sce00564)Glycerophospholipid metabolism; (s  
 crossoverHolliday GO:00709fGO:00056fGO:1904162 5'–3' exodeoxyribonuclease activity involv  
 Sec16p COPII vesGO:00708fGO:00125fGO:0043495 protein membrane anchor;GO:0005515 protein  
 None None None None None None  
 F1F0 ATP Subunit eGO:00159fGO:00002fGO:00469f(sce00190)Oxidative phosphorylation; (sce011  
 Slm4p ComponentGO:00162fGO:00344fGO:0003674 molecular\_function  
 hypotheticalProtein cGO:00194fGO:00058fGO:0004806 triglyceride lipase activity;GO:0016298 li  
 glutamateNAD(+)-deGO:00195fGO:00057fGO:00043f(sce00430)Taurine and hypotaurine metabolism  
 Kar5p Protein rGO:00482fGO:00319fGO:0003674 molecular\_function  
 casein kiAlpha' cGO:00075fGO:00344fGO:00046f(sce04139)Mitophagy – yeast; (sce03008)Ribos  
 organic ePutative GO:19038fGO:00057fGO:0005342 organic acid transmembrane transporter act  
 Faf1p Protein rGO:00004fGO:00057fGO:0003674 molecular\_function  
 ditrans,fForms theGO:00194(GO:19044fGO:00455f(sce00900)Terpenoid backbone biosynthesis; (s  
 dynamin-lDynamin-lGO:00163fGO:00325fGO:0003924 GTPase activity;GO:0005525 GTP binding;GO:  
 SCF E2 ulUbiquitinGO:00311fGO:00190fGO:00616f(sce04120)Ubiquitin mediated proteolysis  
 Vma22p Protein tGO:00070fGO:19908fGO:0051082 unfolded protein binding;GO:0005515 protei  
 Gtb1p GlucosideGO:00064fGO:00171fGO:0004558 alpha-1,4-glucosidase activity;GO:0090599  
 hypotheticalPutative GO:00081fGO:00160fGO:0003674 molecular\_function  
 Tes1p PeroxisomGO:00066fGO:00057fGO:00162f(sce00062)Fatty acid elongation; (sce01040)B  
 mRNA spliCore Sm fGO:00003fGO:00465fGO:00037f(sce03040)Spliceosome  
 None None None None None None  
 Aim41p Protein cGO:00081fGO:00057fGO:0016884 carbon-nitrogen ligase activity, with glut

acetyl-CoA Acetylglutamate synthase (M00028) Ornithine biosynthesis, glutamate =>  
None None None None None None

Atg5p Conserved G0:00448 (G0:01200 (G0:00197 (sce04136) Autophagy - other; (sce04213) Longevity  
hypothetical Dubious G0:00081 (G0:00055 (G0:0003674 molecular\_function

Mps3p Nuclear G0:00007 (G0:00058 (G0:0043495 protein membrane anchor; G0:0005524 ATP binding  
Mum3p Protein G0:00304 (G0:00160 (G0:0016746 transferase activity, transferring acyl groups  
dolichyl-Gamma succinyl-CoA G0:00352 (G0:00082 (G0:00045 (M00072) N-glycosylation by oligosaccharyl transferase  
ribosomal Ribosomal G0:00000 (G0:00226 (G0:00037 (sce03010) Ribosome

metalloprotein Metalloproteinase G0:00714 (G0:00198 (G0:00042 (Human) (hsa05010) Alzheimer's disease

Plp2p Protein G0:00073 (G0:00057 (G0:0031683 G-protein beta/gamma-subunit complex binding  
Gyp5p GTPase-activating protein G0:00906 (G0:00059 (G0:0017137 Rab GTPase binding; G0:0005096 GTPase activating  
Sas3p Histone acetyltransferase G0:00304 (G0:19904 (G0:0010485 H4 histone acetyltransferase activity; G0:00000  
None None None None None None

aminophospholipid Aminophospholipid G0:00007 (G0:00708 (G0:0004012 phospholipid-translocating ATPase activity  
Csm1p Nucleolar G0:00345 (G0:00335 (G0:1990644 microtubule site clamp; G0:0030674 protein binding  
Arp8p Nuclear G0:00325 (G0:00310 (G0:0043140 ATP-dependent 3'-5' DNA helicase activity; G0:00000  
putative Putative G0:00551 (G0:00057 (G0:0016491 oxidoreductase activity; G0:0003824 catalytic  
None None None None None None

Ebp2p Required G0:00422 (G0:00306 (G0:0003729 mRNA binding; G0:0003723 RNA binding; G0:00000  
Cox16p Mitochondrial G0:00336 (G0:00057 (G0:0003674 molecular\_function

Birlp Subunit G0:00070 (G0:00007 (G0:0046872 metal ion binding; G0:0043169 cation binding  
Lrelp Protein G0:00315 (G0:00059 (G0:0004860 protein kinase inhibitor activity; G0:00192  
SCF ubiquitin Putative G0:00311 (G0:00190 (G0:0030674 protein binding, bridging; G0:0004842 ubiquitin  
Gcn1p Positive G0:19042 (G0:00226 (G0:0043022 ribosome binding; G0:0019887 protein kinase  
hypothetical Putative G0:00081 (G0:00160 (G0:0003674 molecular\_function  
None None None None None None

DNA topoisomerase Topoisomerase G0:00001 (G0:00312 (G0:0003917 DNA topoisomerase type I activity; G0:00039  
None None None None None None

mitofusin Mitofusin G0:00080 (G0:00313 (G0:0003924 GTPase activity; G0:0005525 GTP binding; G0:00000  
casein kinase II Beta' regulator G0:00063 (G0:00344 (G0:00302 (sce04139) Mitophagy - yeast; (sce03008) Ribosome  
Aim44p Protein G0:19903 (G0:00059 (G0:0003674 molecular\_function

SNAP receptor-SNARE protein G0:00482 (G0:00125 (G0:00054 (sce04130) SNARE interactions in vesicular trafficking  
phosphoribosyl Phosphoribosyl G0:00061 (G0:00056 (G0:00046 (M00048) Inosine monophosphate biosynthesis, 1-phosphorylation  
Upf3p Component G0:00704 (G0:00058 (G0:00037 (sce03015) mRNA surveillance pathway; (sce03010) Ribosome  
Gat4p Protein G0:00063 (G0:00056 (G0:0008270 zinc ion binding; G0:0043565 sequence-specific  
coatamer Essential G0:00068 (G0:00301 (G0:0005198 structural molecule activity; G0:0003674 molecular\_function  
ribosomal Ribosomal G0:00021 (G0:00226 (G0:00037 (sce03010) Ribosome

pyruvate Pyruvate G0:00060 (G0:00058 (G0:00047 (sce00020) Citrate cycle (TCA cycle); (sce00610) Ribosome  
ribosomal Protein G0:00000 (G0:00226 (G0:00198 (sce03010) Ribosome

Msn1p Transcription factor G0:00360 (G0:00056 (G0:0000978 RNA polymerase II proximal promoter sequence  
putative Putative G0:19026 (G0:00306 (G0:0004004 ATP-dependent RNA helicase activity; G0:00000  
None None None None None None

protein kinase Protein kinase G0:00723 (G0:00056 (G0:0072354 histone kinase activity (H3-T3 specific); G0:00000  
Ndd1p Transcription factor G0:00902 (G0:00056 (G0:0003713 transcription coactivator activity; G0:00037  
Seh1p Subunit G0:19042 (G0:00970 (G0:00170 (sce03013) RNA transport

Pet191p Protein G0:00336 (G0:00313 (G0:0003674 molecular\_function

hypothetical Putative G0:00081 (G0:00055 (G0:0003674 molecular\_function

riboflavin Riboflavin G0:00093 (G0:00057 (G0:00039 (sce00740) Riboflavin metabolism; (sce01110) Biotin  
alpha, aldehyde dehydrogenase Putative G0:00059 (G0:00057 (G0:00045 (sce00500) Starch and sucrose metabolism; (sce00000) Ribosome  
putative Protein G0:00007 (G0:00330 (G0:00080 (sce03440) Homologous recombination

Sto1p Large subunit G0:00310 (G0:00058 (G0:00003 (sce03015) mRNA surveillance pathway; (sce03010) Ribosome  
hexokinase Hexokinase G0:00324 (G0:00057 (G0:00191 (M00549) Nucleotide sugar biosynthesis, glucosyltransferase  
tRNA methyltransferase tRNA methyltransferase G0:00315 (G0:00057 (G0:0008175 tRNA methyltransferase activity; G0:0008173  
xanthine Xanthine G0:00322 (G0:00057 (G0:0000310 xanthine phosphoribosyltransferase activity

Sip3p Putative GO:004575;GO:003254;GO:0016538 cyclin-dependent protein serine/threonine  
peptidyl;Cytoplasm GO:004585;GO:003496;GO:001601 (Human) (hsa05145)Toxoplasmosis; (hsa05012)Pa  
Erp1p Member of GO:000662;GO:003015;GO:0003674 molecular\_function  
hypotheticalPutative GO:001625;GO:000032;GO:0003674 molecular\_function  
putative Protein tGO:011005;GO:000565;GO:000472 (sce04011)MAPK signaling pathway - yeast; (s  
hypotheticalPutative protein of unknown function; functions together with HAM1 to mediate re  
kinetochComponent GO:005131;GO:003126;GO:0044877 protein-containing complex binding;GO:0005  
ATP-deperATP-deper GO:199041;GO:003142;GO:0004004 ATP-dependent RNA helicase activity;GO:000  
Y' elementHelicase GO:000072;GO:000565;GO:0003678 DNA helicase activity;GO:0004386 helicase  
None None None None None None  
putative Subunit cGO:003636;GO:009765;GO:0004842 ubiquitin-protein transferase activity;GO:  
Chl4p Outer kirGO:003405;GO:000094;GO:0005198 structural molecule activity;GO:0003674 mo  
ATP-bindSubunit cGO:001591;GO:000577;GO:000532 (sce02010)ABC transporters; (sce04146)Peroxi  
hypotheticalMitochondGO:000815;GO:003196;GO:0003674 molecular\_function  
Rev3p CatalyticGO:007095;GO:001605;GO:000388 (sce01100)Metabolic pathways  
ssDNA encSingle-strGO:000625;GO:000011;GO:000001 (sce03420)Nucleotide excision repair  
aminophosTrans-goGO:000074;GO:199055;GO:0004012 phospholipid-translocating ATPase activity  
Aselp Mitotic sGO:000007;GO:000588;GO:0008017 microtubule binding;GO:0015631 tubulin bin  
acetyl-CoMitochondGO:200125;GO:000575;GO:000398 (sce)Fatty acid biosynthesis, initiation; (M  
Mpt5p mRNA-bindGO:190015;GO:000575;GO:0030674 protein binding, bridging;GO:0003729 mRNA  
Arf familARF-like GO:00430(GO:004217;GO:0003924 GTPase activity;GO:0005525 GTP binding;GO:  
DNA-bindSubunit cGO:00362(GO:007021;GO:0004842 ubiquitin-protein transferase activity;GO:  
None None None None None None  
hypotheticalPutative GO:000815;GO:000575;GO:0003674 molecular\_function  
replicatiSubunit cGO:000627;GO:003138;GO:000368 (sce03430)Mismatch repair; (sce03030)DNA rep  
succinatMembrane GO:000612;GO:000574;GO:000817 (sce)Citrate cycle, second carbon oxidation,  
prion dom [PIN(+)] GO:000815;GO:000582;GO:0003674 molecular\_function  
flavodoxiProtein cGO:00229(GO:004512;GO:0003955 NAD(P)H dehydrogenase (quinone) activity;G  
ribosomalProtein cGO:00004(GO:002262;GO:000375 (sce03010)Ribosome  
mitochondMitochondGO:003254;GO:000576;GO:0003735 structural constituent of ribosome;GO:0005  
Yet1p EndoplasmGO:007097;GO:000578;GO:0043022 ribosome binding;GO:0043021 ribonucleoprot  
hypotheticalPutative GO:000815;GO:000557;GO:0003674 molecular\_function  
Sps100p Protein rGO:003047;GO:000561;GO:0003674 molecular\_function  
ribosome EssentialGO:004227;GO:002262;GO:0003723 RNA binding;GO:0003677 DNA binding;GO:0003  
ribosomalRibosomalGO:00004(GO:002262;GO:000375 (sce03010)Ribosome  
hypotheticalPutative GO:000815;GO:000557;GO:0003674 molecular\_function  
1-phosphType II rGO:004685;GO:000032;GO:000445 (sce00562)Inositol phosphate metabolism; (sc  
8-oxo-dG18-oxo-dG1GO:001595;GO:000577;GO:0008413 8-oxo-7,8-dihydroguanosine triphosphate py  
Sdalp Protein rGO:000005;GO:000575;GO:0003674 molecular\_function  
ribose p5-phosphGO:000601;GO:000218;GO:000474 (M00005)PRPP biosynthesis, ribose 5P => PRPP  
Hda2p Subunit cGO:001097;GO:007082;GO:0004407 histone deacetylase activity;GO:0033558 pr  
hypotheticalTail-anchGO:000815;GO:000595;GO:0003674 molecular\_function  
Gmh1p Golgi menGO:001615;GO:003017;GO:0003674 molecular\_function  
U2-type sGeneral sGO:000034;GO:000568;GO:0003677 DNA binding;GO:0046872 metal ion binding;G  
None None None None None None  
Pmp3p Small plGO:003565;GO:000588;GO:0080025 phosphatidylinositol-3,5-bisphosphate bind  
ribosomalProtein cGO:00064(GO:002262;GO:001984 (sce03010)Ribosome  
Es11p hEST1A/B GO:000815;GO:000557;GO:0003674 molecular\_function  
S-adenosS-methylGO:001925;GO:000575;GO:000885 (sce00270)Cysteine and methionine metabolism  
hypotheticalPutative GO:000815;GO:003015;GO:0003677 DNA binding;GO:0003676 nucleic acid bindin  
ubiquinorPutative GO:19010(GO:000574;GO:0003954 NADH dehydrogenase activity;GO:0016651 oxi  
rRNA-procSubunit cGO:000047;GO:003204;GO:0003674 molecular\_function  
hypotheticalHelicase-GO:000815;GO:000557;GO:0005524 ATP binding;GO:0032559 adenylyl ribonucleoti  
ubiquitirUbiquitirGO:004572;GO:000565;GO:0004843 thiol-dependent ubiquitin-specific proteas

mitochondrion Mitochondrion GO:003254 GO:000576 GO:000372 (sce03010) Ribosome  
hypothetical Tail-anchored GO:000815 GO:007025 GO:0003674 molecular\_function  
tryptophan Cytoplasm GO:000645 GO:000575 GO:000485 (sce00970) Aminoacyl-tRNA biosynthesis  
hypothetical Putative GO:000815 GO:001602 GO:0003674 molecular\_function  
Sac3p mRNA export GO:007105 GO:004461 GO:0005515 protein binding; GO:0005488 binding; GO:0003  
Rad10p Single-strand break repair GO:000075 GO:007052 GO:000001 (sce03420) Nucleotide excision repair  
Psy2p Subunit c GO:190266 GO:003028 GO:0019888 protein phosphatase regulator activity; GO:0  
hypothetical Protein c GO:000815 GO:000562 GO:0003674 molecular\_function  
Mob1p Component GO:000705 GO:000581 GO:001920 (sce04392) Hippo signaling pathway - multiple  
Nvj3p Protein v GO:199085 GO:007156 GO:0032266 phosphatidylinositol-3-phosphate binding; G  
Yhk8p Presumed GO:000685 GO:000588 GO:0015297 antiporter activity; GO:0015238 drug transp  
ATP-binding ATP-binding GO:199041 GO:000032 GO:0042626 ATPase activity, coupled to transmembrane  
Knh1p Protein v GO:000607 GO:000927 GO:0003674 molecular\_function  
Van1p Component GO:000005 GO:000015 GO:000000 (sce) N-glycan biosynthesis, high-mannose typ  
Hed1p Meiosis-s GO:190387 GO:000079 GO:0004857 enzyme inhibitor activity; GO:0030234 enzym  
hypothetical Putative GO:000815 GO:001602 GO:0003674 molecular\_function  
ribosomal Ribosomal GO:000002 GO:002262 GO:000809 (sce03010) Ribosome  
ribosomal Ribosomal GO:000046 GO:002262 GO:000372 (sce03010) Ribosome  
None None None None None None  
thiamine Mitochondrion GO:199054 GO:003130 GO:0090422 thiamine pyrophosphate transmembrane trans  
Ecm27p Protein i GO:007031 GO:000578 GO:0003674 molecular\_function  
mitochondrion Mitochondrion GO:003105 GO:000576 GO:0004525 ribonuclease III activity; GO:0032296 doubl  
Cyk3p SH3-domain GO:199034 GO:000014 GO:0030234 enzyme regulator activity; GO:0098772 molec  
Signal receptor Signal receptor GO:000661 GO:000578 GO:000504 (sce03060) Protein export  
hypothetical Dubious c GO:000815 GO:000557 GO:0003674 molecular\_function  
hypothetical Putative protein of unknown function; YBR230W-A has a paralog, COQ8, that arose  
Fap1p Protein t GO:000012 GO:000565 GO:0000977 RNA polymerase II regulatory region sequen  
Rmd1p Cytoplasm GO:003045 GO:000032 GO:0003674 molecular\_function  
Gly-Xaa c Vacuolar GO:005160 GO:000032 GO:0004181 metallopeptidase activity; GO:000418  
None None None None None None  
Oca5p Cytoplasm GO:000815 GO:000575 GO:0003674 molecular\_function  
serine/threonine Serine/threonine GO:004602 GO:000575 GO:0004674 protein serine/threonine kinase activity; G  
Mkt1p Protein s GO:009030 GO:001049 GO:0017108 5'-flap endonuclease activity; GO:0048256 f  
Lrp1p Nuclear c GO:007105 GO:000017 GO:000372 (sce03018) RNA degradation  
mitogen-activated Signal transduction GO:007115 GO:000575 GO:003209 (sce04011) MAPK signaling pathway - yeast  
None None None None None None  
putative Protein i GO:000910 GO:000575 GO:001699 (sce00785) Lipoic acid metabolism; (sce01100) l  
Y' element Helicase GO:000072 GO:000565 GO:0003678 DNA helicase activity; GO:0004386 helicase  
hypothetical Protein c GO:000815 GO:000578 GO:0003674 molecular\_function  
Sin4p Subunit c GO:007020 GO:007084 GO:0001102 RNA polymerase II activating transcription  
Pcl6p Pho85p cytoplasm GO:000595 GO:000030 GO:0016538 cyclin-dependent protein serine/threonine  
Ebs1p Protein i GO:003221 GO:000565 GO:0070034 telomerase RNA binding; GO:0042162 telomeric  
Pxl1p Protein t GO:003001 GO:000595 GO:0005094 Rho GDP-dissociation inhibitor activity; GO  
U2 snRNP U2-snRNP GO:000035 GO:000565 GO:000372 (sce03040) Spliceosome  
glyoxylate Glyoxylate GO:000945 GO:000575 GO:0047964 glyoxylate reductase activity; GO:0016618 h  
putative Putative GO:003408 GO:000575 GO:0003924 GTPase activity; GO:0005525 GTP binding; GO:0  
None None None None None None  
4-amino-4-aminopyrimidine Para-aminopyrimidine GO:000815 GO:000575 GO:004682 (sce00790) Folate biosynthesis  
Bud4p Anillin-like GO:000712 GO:000014 GO:0005525 GTP binding; GO:0032550 purine ribonucleoside  
None None None None None None  
hypothetical Putative GO:000815 GO:000557 GO:0003674 molecular\_function  
putative Potential GO:001591 GO:000580 GO:0015247 aminophospholipid transmembrane transport  
ESCRT-I c Component GO:190466 GO:000081 GO:0005515 protein binding; GO:0005488 binding; GO:0003  
hypothetical Putative GO:000815 GO:007194 GO:0003674 molecular\_function



Swd3p Essential GO:190334 GO:004818 GO:0042800 histone methyltransferase activity (H3-K4  
 translational IF3b subunit GO:000218 GO:004361 GO:003136 (sce03013) RNA transport  
 DEAH-box DEAH-box GO:000035 GO:007102 GO:003445 (sce03040) Spliceosome  
 Mtf2p Mitochondrial GO:003254 GO:000575 GO:0003723 RNA binding; GO:0003676 nucleic acid binding  
 Amalp Activator GO:190575 GO:000568 GO:199075 (sce04113) Meiosis - yeast  
 glycylylpeptide N-myristoyltransferase GO:001800 GO:000582 GO:0004379 glycylylpeptide N-tetradecanoyltransferase activity  
 prephenate Prephenate GO:000905 GO:000575 GO:000466 (M00024) Phenylalanine biosynthesis, chorismate  
 None None None None None None  
 Aim7p Protein GO:003431 GO:003047 GO:0071933 Arp2/3 complex binding; GO:0003779 actin binding  
 Urc2p Putative GO:000108 GO:000568 GO:0000981 DNA-binding transcription factor activity,  
 Ifh1p Coactivator GO:006096 GO:003254 GO:0003713 transcription coactivator activity; GO:0003  
 mannose-6-phosphate Mannose-6-phosphate GO:000005 GO:000568 GO:000447 (sce00051) Fructose and mannose metabolism; (sce00051)  
 origin replication Subunit GO:000625 GO:000568 GO:000368 (sce04111) Cell cycle - yeast; (sce04113) Meiosis  
 Emp46p Integral GO:000702 GO:003015 GO:000555 (sce04141) Protein processing in endoplasmic reticulum  
 Tsr1p Protein GO:000046 GO:003068 GO:0034511 U3 snoRNA binding; GO:0030515 snoRNA binding  
 hypothetical Putative GO:000815 GO:000575 GO:0003674 molecular\_function  
 NADHX epimerase NADHX epimerase GO:004645 GO:000575 GO:0052856 NADHX epimerase activity; GO:0052857 NADPHX  
 Mit1p Transcription factor GO:000815 GO:000568 GO:0003677 DNA binding; GO:0003676 nucleic acid binding  
 Kel3p Cytoplasmic GO:000815 GO:000575 GO:0003674 molecular\_function  
 hypothetical Putative (Human) GO:0005515 protein binding; GO:0005488 binding;  
 hypothetical Putative GO:005508 GO:000032 GO:0003674 molecular\_function  
 transcriptional Repressor GO:000708 GO:003330 GO:000115 (sce04111) Cell cycle - yeast  
 Rds1p Putative GO:004594 GO:000568 GO:0000978 RNA polymerase II proximal promoter sequence  
 pyruvate Pyruvate GO:000605 GO:000575 GO:000474 (sce) Guanine ribonucleotide biosynthesis IMP  
 tRNA N6-acetyl Highly conserved GO:000294 GO:000040 GO:0061711 N(6)-L-threonylcarbamoyladenine synthase activity  
 DEAD-box ATP-dependent GO:000035 GO:001049 GO:0033592 RNA strand annealing activity; GO:0004004 A  
 CORVET complex Membrane GO:003251 GO:003326 GO:004349 (sce04138) Autophagy - yeast  
 iron-sulfur Highly conserved GO:000205 GO:190456 GO:0051539 4 iron, 4 sulfur cluster binding; GO:005153  
 inhibitory Subunit GO:000130 GO:199042 GO:0003674 molecular\_function  
 isocitrate Subunit GO:000655 GO:000596 GO:000444 (M00010) Citrate cycle, first carbon oxidation  
 Spp41p Protein GO:001062 GO:000582 GO:0003674 molecular\_function  
 None None None None None None  
 hypothetical Putative GO:004594 GO:000568 GO:0000978 RNA polymerase II proximal promoter sequence  
 1,3-beta-D-glucanase Beta-1,3-GO:007197 GO:000095 GO:0042124 1,3-beta-glucanosyltransferase activity; GO  
 i-AAA protein Catalytic GO:004504 GO:003194 GO:000417 (sce04139) Mitophagy - yeast  
 hypothetical Protein of unknown function; localized to the mitochondrial outer membrane  
 Paf1p Component GO:200125 GO:001659 GO:199026 (sce04011) MAPK signaling pathway - yeast  
 None None None None None None  
 GPI-anchored Transmembrane GO:001625 GO:004276 GO:000392 (sce00563) Glycosylphosphatidylinositol (GPI)-  
 bifunctional Thymidylate GO:000625 GO:000582 GO:000479 (sce00240) Pyrimidine metabolism; (sce01100) M  
 protein (ER protein) GO:000662 GO:000575 GO:001915 (sce04141) Protein processing in endoplasmic  
 None None None None None None  
 None None None None None None  
 IMP dehydrogenase Inosine monophosphate GO:000617 GO:000575 GO:000395 (sce) Guanine ribonucleotide biosynthesis IMP  
 putative Ubiquitin GO:001062 GO:000568 GO:0004843 thiol-dependent ubiquitin-specific protease  
 hypothetical Putative GO:000815 GO:000557 GO:0003674 molecular\_function  
 hypothetical Protein GO:000815 GO:000557 GO:0003674 molecular\_function  
 GTPase-activator GTPase activator GO:000640 GO:000078 GO:000509 (sce03013) RNA transport  
 cyclin-dependent Cyclin-dependent GO:004575 GO:000568 GO:000486 (sce04011) MAPK signaling pathway - yeast; (s  
 hypothetical Protein GO:000815 GO:000568 GO:0003674 molecular\_function  
 None None None None None None  
 hypothetical Putative GO:000815 GO:000557 GO:0008017 microtubule binding; GO:0015631 tubulin binding  
 None None None None None None  
 alpha-glucosyltransferase Alpha-glucosyltransferase GO:001576 GO:000588 GO:0005363 maltose transmembrane transporter activity

calcium-tVacuolar GO:007055GO:000032GO:000538 (Human) (hsa04970)Salivary secretion; (hsa04970)

Syf2p Member ofGO:000035GO:00710(GO:000038 (sce03040)Spliceosome

None None None None None None

Ric1p Protein iGO:004214GO:003406GO:0017112 Rab guanyl-nucleotide exchange factor activation

Ula1p Protein tGO:004511GO:000575GO:0019781 NEDD8 activating enzyme activity;GO:000864

Mrt4p Protein iGO:000005GO:003068GO:0070180 large ribosomal subunit rRNA binding;GO:000

ribulose-D-ribuloseGO:000905GO:000582GO:000475 (M00007)Pentose phosphate pathway, non-oxidative

transcriptionTFIIIB-BGO:009007GO:000012GO:0000994 RNA polymerase III core binding;GO:0001006

glucose 6N-acetylglucosaminylGO:000645GO:000579GO:0008375 acetylglucosaminyltransferase activity;GO:000

None None None None None None

Nup192p EssentialGO:000695GO:004461GO:001705 (sce03013)RNA transport

beta-1,3-O-glycosylGO:00315(GO:000562GO:0005199 structural constituent of cell wall;GO:000

None None None None None None

None None None None None None

Taf1p TFIID subunitGO:005112GO:000566GO:000440 (sce03022)Basal transcription factors

ribosome ComponentGO:000046GO:003068GO:0003674 molecular\_function

Rtp1p Protein iGO:00066(GO:000575GO:0003674 molecular\_function

Ufel1p t-SNARE proteinGO:004827GO:00312(GO:000548 (sce04130)SNARE interactions in vesicular transport

Hir1p Subunit cGO:00307(GO:000041GO:0031491 nucleosome binding;GO:0003714 transcription

carboxylesteraseGO:199057GO:000576GO:0051723 protein methyltransferase activity;GO:0052689

hypotheticalPutative GO:000815GO:000557GO:0003674 molecular\_function

GTPase-activatorGO:003108GO:003012GO:000519 (sce04141)Protein processing in endoplasmic reticulum

Rab familyRab familyGO:00071(GO:004335GO:000392 (sce04144)Endocytosis

None None None None None None

ribosomalRibosomalGO:000046GO:002262GO:000375 (sce03010)Ribosome

Aim29p Protein cGO:000815GO:000575GO:0003674 molecular\_function

aminoacyl-tRNA synthetaseGO:003245GO:000574GO:0004045 aminoacyl-tRNA hydrolase activity;GO:01401

putative Putative GO:000815GO:000565GO:0016853 isomerase activity;GO:0003824 catalytic activity

Y' elementHelicaseGO:000815GO:000565GO:0004386 helicase activity;GO:0017111 nucleoside-triphosphatase

putative Putative GO:005511GO:000582GO:0004617 phosphoglycerate dehydrogenase activity;GO:000

SAM complexComponentGO:004504GO:00014(GO:0003674 molecular\_function

mRNA splicingMember ofGO:000035GO:000566GO:000367 (sce03040)Spliceosome

kleisin cEssentialGO:003408GO:003495GO:001990 (sce04111)Cell cycle - yeast

None None None None None None

Swc5p ComponentGO:004345GO:000081GO:0003674 molecular\_function

Aim26p Protein cGO:000046GO:003196GO:0003674 molecular\_function

Tod6p PAC motifGO:000635GO:007021GO:0043565 sequence-specific DNA binding;GO:0003677 DNA binding

hypotheticalProtein cGO:000815GO:000588GO:0003674 molecular\_function

Mch2p Protein vGO:001571GO:001602GO:0008028 monocarboxylic acid transmembrane transporter

Rho familyNon-essentialGO:003095GO:003215GO:0003924 GTPase activity;GO:0005525 GTP binding;GO:000

transcriptionSubunit cGO:004275GO:000075GO:0001002 RNA polymerase III type 1 promoter sequence

rRNA-bindingConstituentGO:000046GO:003068 (Human)GO:0003723 RNA binding;GO:0003676 nucleic acid binding

Tma7p Protein cGO:000215GO:000565GO:0043024 ribosomal small subunit binding;GO:0043021

SCF ubiquitin-ligaseGO:001075GO:00190(GO:0004842 ubiquitin-protein transferase activity;GO:000

Rgi2p Protein cGO:000611GO:000575GO:0003674 molecular\_function

GPI-anchoredSubunit cGO:001625GO:004276GO:000392 (sce00563)Glycosylphosphatidylinositol (GPI)-anchored

Ssp2p SporulationGO:003047GO:000561GO:0003676 nucleic acid binding;GO:1901363 heterocycle

translationDelta subunitGO:000645GO:003204GO:000375 (sce03013)RNA transport

ribosome NucleolarGO:190262GO:003068GO:0003723 RNA binding;GO:0003676 nucleic acid binding

indolepyruvateMinor isomerGO:000094GO:000582GO:005017 (sce00010)Glycolysis / Gluconeogenesis; (sce00010)

ethanolan Ethanolan GO:000664 GO:000565 GO:000430 (sce) Phosphatidylethanolamine (PE) biosynthesis; molecular\_function

putative Tyrosine GO:003535 GO:000582 GO:0004725 protein tyrosine phosphatase activity; GO:0004725

DNA-binding Carbon sequestration GO:006142 GO:000582 GO:0001093 TFIIIB-class transcription factor binding; GO:0001093

Gtr2p Subunit c GO:190377 GO:003444 GO:0003924 GTPase activity; GO:0005525 GTP binding; GO:0005525

None None None None None None

Ctf3p Outer kinetochore GO:000705 GO:000077 GO:0003674 molecular\_function

mRNA splicing U1 snRNP GO:000035 GO:000024 GO:0030627 pre-mRNA 5'-splice site binding; GO:0036002

high-affinity High affinity GO:190165 GO:003357 GO:0015093 ferrous iron transmembrane transporter activity; GO:0015093

None None None None None None

None None None None None None

dolichyl-Alpha-1,6-GlcNAc transferase GO:000645 GO:000578 GO:005291 (sce) N-glycan precursor biosynthesis; (M00051) N-glycan precursor biosynthesis

Rab family Rab family GO:003288 GO:199081 GO:000392 (sce04145) Phagosome; (sce04144) Endocytosis; GO:000392

ribose phosphate 5-phosphoribosyl transferase GO:000601 GO:000218 GO:000474 (M00005) PRPP biosynthesis, ribose 5P => PRPP

Erv4lp Protein lipoic acid transferase GO:000688 GO:003017 GO:0003674 molecular\_function

Vps52p Component of vacuole sorting complex GO:009015 GO:000095 GO:0019905 syntaxin binding; GO:0017137 Rab GTPase binding; GO:0017137

bifunctional Tripartite complex GO:007195 GO:000078 GO:001710 (sce03030) DNA replication

ribosomal Ribosomal GO:000218 GO:002262 GO:000375 (sce03010) Ribosome

centromeric Histone H1 GO:006164 GO:000572 GO:0019237 centromeric DNA binding; GO:0031492 nucleosome assembly; GO:0031492

mRNA-binding Protein i GO:004227 GO:003069 GO:0003729 mRNA binding; GO:0003723 RNA binding; GO:0003723

hypothetical Protein c GO:000815 GO:000582 GO:0003674 molecular\_function

Mac1p Copper-sulfur cluster binding GO:000687 GO:000565 GO:0005507 copper ion binding; GO:0000978 RNA polymerase activity; GO:0000978

None None None None None None

translational Translational GO:199014 GO:000585 GO:0003746 translation elongation factor activity; GO:0003746

ribosomal Ribosomal GO:000044 GO:003068 GO:000375 (sce03010) Ribosome

chitin deacetylase Chitin deacetylase GO:003047 GO:000565 GO:000409 (sce00520) Amino sugar and nucleotide sugar metabolism; GO:000409

None None None None None None

hypothetical Putative GO:000815 GO:000578 GO:0003674 molecular\_function

DNA-directed RNA polymerase RNA polymerase GO:000117 GO:000566 GO:000396 (sce03020) RNA polymerase; (sce00240) Pyrimidine biosynthesis; GO:000396

E3 ubiquitin-protein ligase E3 ubiquitin-protein ligase GO:012017 GO:199030 GO:1904855 proteasome regulatory particle binding; GO:0000000

Jjj1p Co-chaperone protein GO:000000 GO:003068 GO:0001671 ATPase activator activity; GO:0060590 ATPase activity; GO:0060590

catalase Catalase GO:000131 GO:000578 GO:000409 (sce00380) Tryptophan metabolism; (sce00630) Glutathione metabolism; GO:000409

hypothetical Putative protein of unknown function; identified by gene-trapping, microarray-based screen; GO:0000000

spindle component Component of spindle GO:000705 GO:000077 GO:004487 (sce04111) Cell cycle - yeast; (sce04113) Meiosis; GO:000077

hypothetical Putative GO:004288 GO:001602 GO:0015297 antiporter activity; GO:0015238 drug transmembrane transport; GO:0015238

Tma64p Protein c GO:000175 GO:002262 GO:0043024 ribosomal small subunit binding; GO:0003743

U2 snRNP U2B component GO:000035 GO:000566 GO:0030620 U2 snRNA binding; GO:0035614 snRNA stem-loop binding; GO:0035614

hypothetical Putative GO:000815 GO:001602 GO:0003674 molecular\_function

hypothetical Putative GO:000815 GO:000578 GO:0003674 molecular\_function

Zn(2+) transporter Zinc transporter GO:000688 GO:000578 GO:0005385 zinc ion transmembrane transporter activity; GO:0005385

Rab family Rab family GO:000662 GO:000032 GO:0003924 GTPase activity; GO:0005525 GTP binding; GO:0005525

signal peptide Subunit c GO:000645 GO:000578 GO:000825 (sce03060) Protein export

translational IF3g subunit GO:000218 GO:004361 GO:000375 (sce03013) RNA transport

hypothetical Putative GO:000815 GO:001602 GO:0003674 molecular\_function

Plp1p Protein t GO:000732 GO:000578 GO:0031683 G-protein beta/gamma-subunit complex binding; GO:0031683

Y' element Helicase GO:000072 GO:000565 GO:0003678 DNA helicase activity; GO:0004386 helicase activity; GO:0004386

ribosomal Ribosomal GO:004802 GO:002262 GO:003062 (sce03010) Ribosome

hypothetical Putative GO:000815 GO:000578 GO:0003674 molecular\_function

lipid-binding Eicosome GO:007094 GO:003628 GO:0008289 lipid binding; GO:0005488 binding; GO:0003674

rRNA-processing Putative GO:000047 GO:003204 GO:000452 (sce03008) Ribosome biogenesis in eukaryotes

2-hexaprenyl 2-hexaprenyl transferase GO:000674 GO:000574 GO:004333 (M00128) Ubiquinone biosynthesis, eukaryotes, GO:000574

alpha-tubulin Alpha-tubulin GO:009888 GO:000582 GO:000520 (sce04145) Phagosome

Rgd1p GTPase-activator protein GO:000725 GO:003047 GO:0010314 phosphatidylinositol-5-phosphate binding; GO:0010314

hypothetical Putative GO:003422 GO:000557 GO:0004360 glutamine-fructose-6-phosphate transaminase activity; GO:0004360

|                   |                     |           |            |                                             |                                               |                       |
|-------------------|---------------------|-----------|------------|---------------------------------------------|-----------------------------------------------|-----------------------|
| Pet11lp           | Mitochondrion       | GO:007015 | GO:000574  | GO:0045182                                  | translation regulator activity;GO:0003674     |                       |
| Esc8p             | Protein             | GO:000706 | GO:000565  | GO:0003674                                  | molecular_function                            |                       |
| Stulp             | Component           | GO:005131 | GO:0000777 | condensed chromosome kinetochore;GO:0005816 | spindle                                       |                       |
| bleomycin         | Cysteine            | GO:004341 | GO:000575  | GO:0004177                                  | aminopeptidase activity;GO:0004197            | cysteine              |
| E3 ubiquitin      | Membrane            | GO:003045 | GO:0000085 | GO:006165                                   | (sce04141)Protein processing in endoplasmic   |                       |
| Inp2p             | Peroxisome          | GO:004505 | GO:000577  | GO:0043495                                  | protein membrane anchor;GO:0005515            | protein               |
| Ssn2p             | Subunit             | GO:000045 | GO:001659  | GO:0001135                                  | RNA polymerase II transcription regulator     |                       |
| Lso2p             | Protein             | GO:005507 | GO:000565  | GO:0043022                                  | ribosome binding;GO:0043021                   | ribonucleoprotein     |
| hypothetical      | Dubious             | GO:000815 | GO:000557  | GO:0003674                                  | molecular_function                            |                       |
| alpha-glucosyl    | Alpha-glucosyl      | GO:001576 | GO:000032  | GO:0005363                                  | maltose transmembrane transporter activity    |                       |
| adenylosuccinate  | Adenylosuccinate    | GO:004421 | GO:000557  | GO:007062                                   | (M00048)Inosine monophosphate biosynthesis,   |                       |
| Pfslp             | Sporulation         | GO:003047 | GO:000581  | GO:0003674                                  | molecular_function                            |                       |
| None              | None                | None      | None       | None                                        | None                                          |                       |
| hydroxyacyl-CoA   | Mitochondrion       | GO:001924 | GO:000575  | GO:000441                                   | (sce00620)Pyruvate metabolism                 |                       |
| hypothetical      | Putative            | GO:000815 | GO:000557  | GO:0003674                                  | molecular_function                            |                       |
| None              | None                | None      | None       | None                                        | None                                          |                       |
| Bud22p            | Protein             | GO:003045 | GO:003068  | GO:0003674                                  | molecular_function                            |                       |
| ribosomal         | Ribosomal           | GO:004689 | GO:002262  | GO:000375                                   | (sce03010)Ribosome                            |                       |
| hypothetical      | Protein             | GO:000815 | GO:000565  | GO:0003674                                  | molecular_function                            |                       |
| ATP-dependent     | ATP-dependent       | GO:000037 | GO:000026  | GO:0008859                                  | exoribonuclease II activity;GO:0004004        | ATP                   |
| Csm3p             | Replication         | GO:003408 | GO:003129  | GO:0003677                                  | DNA binding;GO:0003676                        | nucleic acid binding  |
| putative          | Putative            | GO:003225 | GO:000575  | GO:0008757                                  | S-adenosylmethionine-dependent methyltrans    |                       |
| peptidyl          | Peptidyl            | GO:000041 | GO:000032  | GO:0016018                                  | cyclosporin A binding;GO:0003755              | peptidyl              |
| mitogen-activated | Middle              | GO:003047 | GO:000575  | GO:0004707                                  | MAP kinase activity;GO:0004674                | protein serine        |
| ATP-dependent     | ATP-dependent       | GO:007104 | GO:003149  | GO:003445                                   | (sce03018)RNA degradation                     |                       |
| Bre2p             | Subunit             | GO:008015 | GO:004818  | GO:0042800                                  | histone methyltransferase activity (H3-K4     |                       |
| cleavage          | Essential           | GO:009878 | GO:000584  | GO:000375                                   | (sce03015)mRNA surveillance pathway           |                       |
| Bck2p             | Serine/threonine    | GO:000008 | GO:000565  | GO:0003674                                  | molecular_function                            |                       |
| guanine           | RG-protein          | GO:190266 | GO:002262  | GO:000505                                   | (Human) (hsa05162)Measles                     |                       |
| hypothetical      | Protein             | GO:000815 | GO:000584  | GO:0043022                                  | ribosome binding;GO:0043021                   | ribonucleoprotein     |
| Pat1p             | Deadenylation       | GO:000029 | GO:199072  | GO:000375                                   | (sce03018)RNA degradation                     |                       |
| Emc3p             | Member of           | GO:003497 | GO:007254  | GO:0003674                                  | molecular_function                            |                       |
| Mrx8p             | Protein             | GO:000815 | GO:000575  | GO:0005525                                  | GTP binding;GO:0032550                        | purine ribonucleoside |
| Est1p             | TLC1 RNA            | GO:007191 | GO:000569  | GO:0070034                                  | telomerase RNA binding;GO:0042162             | telomeric             |
| U4/U6-U5          | mRNA splice         | GO:000034 | GO:004654  | GO:0003723                                  | RNA binding;GO:0003676                        | nucleic acid binding  |
| protein kinase    | Nim1p-related       | GO:190295 | GO:000014  | GO:000467                                   | (sce04011)MAPK signaling pathway - yeast; (s  |                       |
| AMP-activated     | Activating          | GO:004572 | GO:000564  | GO:0004679                                  | AMP-activated protein kinase activity;GO:0    |                       |
| Cbs1p             | Mitochondrion       | GO:003455 | GO:003131  | GO:0045182                                  | translation regulator activity;GO:0003674     |                       |
| None              | None                | None      | None       | None                                        | None                                          |                       |
| chromatin         | Subunit             | GO:005112 | GO:004669  | GO:001625                                   | (sce03022)Basal transcription factors         |                       |
| ribosomal         | Ribosomal           | GO:000218 | GO:002262  | GO:000375                                   | (sce03010)Ribosome                            |                       |
| bifunctional      | DNA N-gly           | GO:009029 | GO:000575  | GO:000071                                   | (sce03410)Base excision repair                |                       |
| Emc5p             | Member of           | GO:003497 | GO:007254  | GO:0003674                                  | molecular_function                            |                       |
| Mrs1p             | Splicing            | GO:000037 | GO:000575  | GO:0000402                                  | crossed form four-way junction DNA binding    |                       |
| translational     | Translational       | GO:000641 | GO:001049  | GO:0003746                                  | translation elongation factor activity;GO:0   |                       |
| Psy3p             | Component           | GO:000075 | GO:009719  | GO:0003674                                  | molecular_function                            |                       |
| rRNA-processing   | Subunit             | GO:004227 | GO:003438  | GO:000367                                   | (sce03008)Ribosome biogenesis in eukaryotes   |                       |
| mitochondrial     | Mitochondrion       | GO:003254 | GO:000576  | GO:0000048                                  | peptidyltransferase activity;GO:0016755       | tr                    |
| hypothetical      | Protein             | GO:000815 | GO:000578  | GO:0003674                                  | molecular_function                            |                       |
| calmodulin        | Calmodulin          | GO:003459 | (Human)G   | GO:000468                                   | (Human) (hsa04925)Aldosterone synthesis and s |                       |
| Cis3p             | Mannose-6-phosphate | GO:003151 | GO:000595  | GO:0005199                                  | structural constituent of cell wall;GO:000    |                       |
| hypothetical      | Putative            | GO:000815 | GO:000557  | GO:000367                                   |                                               |                       |

|           |             |           |           |            |                                                |
|-----------|-------------|-----------|-----------|------------|------------------------------------------------|
| Stb5p     | Transcrip   | G0:004361 | G0:000565 | G0:0000981 | DNA-binding transcription factor activity,     |
| Rgplp     | Subunit c   | G0:004214 | G0:003406 | G0:0017112 | Rab guanyl-nucleotide exchange factor acti     |
|           | serine/thr  | G0:200036 | G0:003047 | G0:0004674 | protein serine/threonine kinase activity;G     |
|           | glutamate   | G0:001967 | G0:000582 | G0:000435  | (sce00910)Nitrogen metabolism; (sce00220)Arg   |
| Chs7p     | Protein c   | G0:003422 | G0:000562 | G0:0051082 | unfolded protein binding;G0:0005515 protei     |
| None      | None        | None      | None      | None       | None                                           |
| Rrt5p     | Putative    | G0:000815 | G0:000562 | G0:0003723 | RNA binding;G0:0003676 nucleic acid bindin     |
| None      | None        | None      | None      | None       | None                                           |
|           | mannose-6   | G0:000651 | G0:003017 | G0:005126  | (sce00563)Glycosylphosphatidylinositol (GPI)-  |
| Rmd8p     | Cytosolic   | G0:003045 | G0:000578 | G0:0003674 | molecular_function                             |
|           | putative    | G0:007155 | G0:000032 | G0:000418  | (Human) (hsa04614)Renin-angiotensin system; (l |
| Lys14p    | Transcrip   | G0:200115 | G0:000565 | G0:0000978 | RNA polymerase II proximal promoter sequen     |
|           | putative    | G0:000005 | G0:000579 | G0:0000026 | alpha-1,2-mannosyltransferase activity;G0:0    |
| Stb4p     | Putative    | G0:000635 | G0:000575 | G0:0000981 | DNA-binding transcription factor activity,     |
| RNA polym | Mitochond   | G0:000635 | G0:003424 | G0:0034246 | mitochondrial sequence-specific DNA-bindin     |
| Cbp2p     | Required    | G0:000037 | G0:000575 | G0:0003723 | RNA binding;G0:0003676 nucleic acid bindin     |
|           | ferroxidase | G0:003321 | G0:000032 | G0:0005381 | iron ion transmembrane transporter activit     |
|           | putative    | G0:000651 | G0:000578 | G0:000458  | (sce)GPI-anchor biosynthesis, core oligosaccl  |
| None      | None        | None      | None      | None       | None                                           |
|           | alpha-1,2   | G0:004635 | G0:000015 | G0:000002  | (sce)N-glycan biosynthesis, high-mannose typ   |
|           | mitogen-act | G0:000725 | G0:000595 | G0:000470  | (sce04011)MAPK signaling pathway - yeast       |
|           | 2,5-diamin  | G0:000925 | G0:000557 | G0:000870  | (sce00740)Riboflavin metabolism; (sce01100)M   |
| CCR4-NOT  | Subunit c   | G0:001060 | G0:003001 | G0:000167  | (sce03018)RNA degradation                      |
| Emclp     | Member of   | G0:003497 | G0:007254 | G0:0003674 | molecular_function                             |
|           | putative    | G0:001940 | G0:000578 | G0:0102389 | polyprenol reductase activity;G0:0003865 3     |
| RNase P/F | Subunit c   | G0:003496 | G0:000565 | G0:003320  | (sce03008)Ribosome biogenesis in eukaryotes;   |
|           | isoleucine  | G0:007015 | G0:000575 | G0:000482  | (sce00970)Aminoacyl-tRNA biosynthesis          |
|           | hypotheti   | G0:000815 | G0:000557 | G0:0003674 | molecular_function                             |
| None      | None        | None      | None      | None       | None                                           |
|           | glucose-6   | G0:004572 | G0:003465 | G0:0003674 | molecular_function                             |
|           | phosphati   | G0:190135 | G0:000576 | G0:0008526 | phosphatidylinositol transporter activity;G    |
| Rchlp     | Putative    | G0:001591 | G0:007194 | G0:0015248 | sterol transporter activity;G0:0005319 lip     |
|           | kinase-re   | G0:006140 | G0:000582 | G0:0000156 | phosphorelay response regulator activity;G     |
| Cin5p     | Basic lei   | G0:004255 | G0:000565 | G0:0070491 | repressing transcription factor binding;G0     |
| Shylp     | Mitochond   | G0:003361 | G0:000574 | G0:0051082 | unfolded protein binding;G0:0005515 protei     |
|           | mitochond   | G0:003254 | G0:000576 | G0:0003735 | structural constituent of ribosome;G0:0005     |
|           | hypotheti   | G0:000815 | G0:001602 | G0:0003674 | molecular_function                             |
| None      | None        | None      | None      | None       | None                                           |
| None      | None        | None      | None      | None       | None                                           |
| None      | None        | None      | None      | None       | None                                           |
|           | saccharo    | G0:001987 | G0:007194 | G0:000475  | (M00030)Lysine biosynthesis, AAA pathway, 2-   |
|           | thiosulfate | G0:000815 | G0:000575 | G0:0004792 | thiosulfate sulfurtransferase activity;G0:0    |
| Cse2p     | Subunit c   | G0:005112 | G0:007084 | G0:0003712 | transcription coregulator activity;G0:0005     |
| Mrmlp     | Ribose me   | G0:003116 | G0:000575 | G0:0008989 | rRNA (guanine-N1-)-methyltransferase activ     |
|           | tricalbin   | G0:006030 | G0:003254 | G0:0005544 | calcium-dependent phospholipid binding;G0:0    |
| Asglp     | Zinc clus   | G0:004594 | G0:000565 | G0:0000981 | DNA-binding transcription factor activity,     |
|           | guanine r   | G0:007170 | G0:000582 | G0:003168  | (sce04011)MAPK signaling pathway - yeast       |
| Asi2p     | Subunit c   | G0:003636 | G0:009765 | G0:0003674 | molecular_function                             |
| Golgi tra | Component   | G0:003222 | G0:001711 | G0:0003674 | molecular_function                             |
|           | pyruvate E  | G0:000608 | G0:000596 | G0:000475  | (M00307)Pyruvate oxidation, pyruvate => acet   |
|           | protein f   | G0:001834 | G0:000596 | G0:000466  | (sce00900)Terpenoid backbone biosynthesis; (G  |
| Arg8lp    | Zinc fin    | G0:000082 | G0:000565 | G0:0000978 | RNA polymerase II proximal promoter sequen     |
| Cti6p     | Component   | G0:006118 | G0:003369 | G0:0035064 | methylated histone binding;G0:0140034 meth     |
| None      | None        | None      | None      | None       | None                                           |

Mrx1p Protein (GO:000815;GO:000575;GO:0003674) molecular\_function

proteinasVacuolar GO:000662;GO:000032;GO:000415 (sce04138)Autophagy - yeast

Nfulp Protein (GO:000688;GO:000575;GO:0051539) 4 iron, 4 sulfur cluster binding;GO:0051539

glutathionePossible GO:006172;GO:001049;GO:0019172 glyoxalase III activity;GO:0016836 hydro-l

malate dePeroxisomeGO:000675;GO:199042;GO:003006 (M00012)Glyoxylate cycle; (sce)Glyoxylate cy

mediator Subunit (GO:005112;GO:007084;GO:0003712) transcription coregulator activity;GO:0140

Irc23p Protein (GO:000815;GO:000575;GO:0003674) molecular\_function

hypotheticalPutative GO:000815;GO:000565;GO:0043565 sequence-specific DNA binding;GO:0003677 D

ribosomalProtein (GO:000641;GO:002262;GO:000372 (sce03010)Ribosome

Mef2p MitochondrionGO:003275;GO:000575;GO:0003746 translation elongation factor activity;GO:0

Y' elementPutative GO:000815;GO:000557;GO:0004386 helicase activity;GO:0017111 nucleoside-tr

Ids2p Protein (GO:005132;GO:000565;GO:0003674) molecular\_function

phosphatidyPolyphosphatidyGO:004688;GO:003047;GO:004381 (sce00562)Inositol phosphate metabolism; (sce

Taf4p TFIID subunitGO:005112;GO:000566;GO:0016251 RNA polymerase II general transcription in

DEAH-box DEAH-box GO:000003;GO:007101;GO:003445 (sce03040)Spliceosome

hypotheticalCytoplasmicGO:000815;GO:000575;GO:0003674) molecular\_function

Mgr2p Subunit (GO:004505;GO:000575;GO:0003674) molecular\_function

ribosomalProtein (GO:000041;GO:002262;GO:000372 (sce03010)Ribosome

Ntc20p Member ofGO:000003;GO:007101;GO:0000384 first spliceosomal transesterification act

Gip2p Putative GO:000597;GO:000016;GO:0019888 protein phosphatase regulator activity;GO:0

nucleosideEssentialGO:004694;GO:001049;GO:000401 (sce)Adenine ribonucleotide biosynthesis, IM

None None None None None None

dynamidinMitochondrionGO:000805;GO:009701;GO:0003924 GTPase activity;GO:0008017 microtubule bin

phosphatidyPhosphoinositideGO:007094;GO:003195;GO:0005546 phosphatidylinositol-4,5-bisphosphate bind

E3 ubiquitinRING fingerGO:003621;GO:000015;GO:0031624 ubiquitin conjugating enzyme binding;GO:00

pseudouridyPseudouridyGO:000045;GO:000565;GO:0106029 tRNA pseudouridine synthase activity;GO:00

methyleneProtein (GO:000908;GO:000582;GO:000448 (sce00670)One carbon pool by folate; (sce0120

Nup188p Subunit (GO:003195;GO:004461;GO:001705 (sce03013)RNA transport

None None None None None None

Atg31p AutophagyGO:004488;GO:199031;GO:000367 (sce04138)Autophagy - yeast

Afilp Arf3p polGO:000002;GO:000595;GO:0003674) molecular\_function

mediator Subunit (GO:005112;GO:007084;GO:0003712) transcription coregulator activity;GO:0140

Cwp2p CovalentGO:003151;GO:000927;GO:0005199 structural constituent of cell wall;GO:000

None None None None None None

DNA-dependentSnf2p factorGO:007087;GO:000078;GO:0008094 DNA-dependent ATPase activity;GO:0004386 h

purine-mPurine metabolismGO:004611;GO:000575;GO:004772 (sce00760)Nicotinate and nicotinamide metabo

None None None None None None

coiled-coiledCoiled-coiledGO:009026;GO:000077;GO:004487 (sce04111)Cell cycle - yeast; (sce04113)Meio

None None None None None None

None None None None None None

hypotheticalPutative GO:000815;GO:000557;GO:0003674) molecular\_function

None None None None None None

ribonucleicRibonucleicGO:004315;GO:003229;GO:000452 (sce03030)DNA replication

Smy2p GYF domainGO:000688;GO:000095;GO:0003674) molecular\_function

hypotheticalPutative GO:005508;GO:000032;GO:0022857 transmembrane transporter activity;GO:0005

rRNA (cyt)rRNA m5C GO:007047;GO:003068;GO:0009383 rRNA (cytosine-C5-)-methyltransferase acti

None None None None None None

None None None None None None

hypotheticalProtein (GO:000815;GO:000557;GO:0003674) molecular\_function

None None None None None None

|                         |                   |            |            |            |                                                                              |
|-------------------------|-------------------|------------|------------|------------|------------------------------------------------------------------------------|
| None                    | None              | None       | None       | None       | None                                                                         |
| SPX domain              | Low-affinity      | GO:200018  | GO:000588  | GO:0005315 | inorganic phosphate transmembrane transporter activity                       |
| None                    | None              | None       | None       | None       | None                                                                         |
| fatty acid              | Fatty acid        | GO:003462  | GO:003017  | GO:010275  | (sce)Fatty acid biosynthesis, elongation, and modification                   |
| Tap42p                  | Essential         | GO:004594  | GO:001989  | GO:005172  | (sce04136)Autophagy - other; (sce04138)Autophagy - yeast                     |
| Srb6p                   | Subunit c         | GO:004594  | GO:007084  | GO:0003712 | transcription coregulator activity;GO:0140000                                |
| None                    | None              | None       | None       | None       | None                                                                         |
| bifunctional            | Uridylate         | GO:000620  | GO:000562  | GO:000412  | (sce)Pyrimidine ribonucleotide biosynthesis, regulation of                   |
| Izh4p                   | Membrane          | GO:000688  | GO:000032  | GO:0038023 | signaling receptor activity;GO:0060089 molecular function                    |
| L-methionine            | Methionine        | GO:003455  | GO:000582  | GO:007019  | (sce00270)Cysteine and methionine metabolism                                 |
| AAA family              | AAA-peroxisome    | GO:001656  | GO:000577  | GO:001688  | (sce04146)Peroxisome                                                         |
| putative                | Cell wall         | GO:000074  | GO:000927  | GO:0042973 | glucan endo-1,3-beta-D-glucosidase activity                                  |
| hypothetical            | Protein c         | GO:000815  | GO:000032  | GO:0003674 | molecular_function                                                           |
| bifunctional            | sn-1,2-di         | GO:000665  | GO:000015  | GO:000414  | (sce)Phosphatidylethanolamine (PE) biosynthesis                              |
| hypothetical            | Putative          | GO:000815  | GO:000557  | GO:0003674 | molecular_function                                                           |
| hypothetical            | Putative          | GO:000815  | GO:000557  | GO:0003674 | molecular_function                                                           |
| Gpb2p                   | Multisubunit      | GO:001025  | GO:000575  | GO:0004862 | cAMP-dependent protein kinase inhibitor activity                             |
| cytochrome              | Cytochrome        | GO:001802  | GO:000582  | GO:000027  | (sce00310)Lysine degradation                                                 |
| Hop                     | Site-specific     | GO:000072  | GO:000565  | GO:0004519 | endonuclease activity;GO:0004518 nuclease activity                           |
| phosphate               | Basic helix       | GO:001605  | GO:000565  | GO:000371  | (sce04111)Cell cycle - yeast                                                 |
| calnexin                | Calnexin          | GO:003045  | GO:003017  | GO:005108  | (sce04145)Phagosome; (sce04141)Protein processing                            |
| Mcm21p                  | Component         | GO:190526  | GO:000081  | GO:0003674 | molecular_function                                                           |
| Eos1p                   | Protein i         | GO:000648  | GO:000578  | GO:0003674 | molecular_function                                                           |
| Elf1p                   | Transcription     | GO:004805  | GO:000802  | GO:0000993 | RNA polymerase II complex binding;GO:004310                                  |
| Dad1p                   | Essential         | GO:005198  | GO:004272  | GO:0051010 | microtubule plus-end binding;GO:0008017 microtubule plus-end binding         |
| 5'-(N(7)-Non-essential) | RNA               | GO:190191  | GO:000095  | GO:004465  | (sce03018)RNA degradation                                                    |
| polyadenylation         | Poly (A) tail     | GO:006021  | GO:001049  | GO:000842  | (sce03015)mRNA surveillance pathway; (sce03015)mRNA surveillance pathway     |
| prefoldin               | Subunit c         | GO:003296  | GO:001627  | GO:0051082 | unfolded protein binding;GO:0005515 protein binding                          |
| Bos1p                   | v-SNARE           | GO:004828  | GO:001250  | GO:000548  | (sce04130)SNARE interactions in vesicular transport                          |
| Hos4p                   | Subunit c         | GO:001657  | GO:003496  | GO:0003674 | molecular_function                                                           |
| None                    | None              | None       | None       | None       | None                                                                         |
| iron-sulfur             | Component         | GO:001622  | GO:009736  | GO:0003674 | molecular_function                                                           |
| Tma20p                  | Protein c         | GO:000218  | GO:002262  | GO:0043024 | ribosomal small subunit binding;GO:0043021                                   |
| Rsc30p                  | Component         | GO:000635  | GO:001658  | GO:0015616 | DNA translocase activity;GO:0008094 DNA-degradation                          |
| glutathione             | Phospholipid      | GO:009886  | GO:003131  | GO:004706  | (sce00590)Arachidonic acid metabolism; (sce00590)Arachidonic acid metabolism |
| None                    | None              | None       | None       | None       | None                                                                         |
| metalloprotease         | Amino-peptidase   | GO:004317  | GO:003028  | GO:0070006 | metalloaminopeptidase activity;GO:0004177 metalloaminopeptidase activity     |
| Nis1p                   | Protein localized | GO:0005935 | GO:0005935 | GO:0005933 | cellular bud neck;GO:0005933 cellular bud neck                               |
| Mhplp                   | Microtubule       | GO:000702  | GO:000587  | GO:0005200 | structural constituent of cytoskeleton;GO:0005200                            |
| None                    | None              | None       | None       | None       | None                                                                         |
| Hap3p                   | Subunit c         | GO:000044  | GO:001666  | GO:000097  | (Human) (hsa04612)Antigen processing and presentation                        |
| [acyl-carrier]          | Predicted         | GO:000665  | GO:000575  | GO:000431  | (sce)Fatty acid biosynthesis, initiation; (M000000)                          |
| None                    | None              | None       | None       | None       | None                                                                         |
| Y' element              | Helicase          | GO:000072  | GO:000565  | GO:0003678 | DNA helicase activity;GO:0004386 helicase activity                           |
| Vam6p                   | Guanine rich      | GO:003288  | GO:199081  | GO:000508  | (sce04138)Autophagy - yeast                                                  |
| None                    | None              | None       | None       | None       | None                                                                         |
| None                    | None              | None       | None       | None       | None                                                                         |
| None                    | None              | None       | None       | None       | None                                                                         |
| Vph2p                   | Integral          | GO:000702  | GO:199087  | GO:0003674 | molecular_function                                                           |
| Atp10p                  | Assembly          | GO:003361  | GO:003259  | GO:0051082 | unfolded protein binding;GO:0005515 protein binding                          |
| linker nucleosome       | Linker nucleosome | GO:000005  | GO:004461  | GO:0017056 | structural constituent of nuclear pore;GO:0005515                            |
| Mip6p                   | Putative          | GO:000648  | GO:001049  | GO:0008143 | poly(A) binding;GO:0008266 poly(U) RNA binding                               |
| Karl1p                  | Protein i         | GO:003047  | GO:000582  | GO:0005515 | protein binding;GO:0005488 binding;GO:0003674                                |
| H(+)-exporter           | Plasma membrane   | GO:190290  | GO:004512  | GO:000855  | (sce00190)Oxidative phosphorylation                                          |

|                             |                       |                                                                                                       |          |            |                                                                                              |
|-----------------------------|-----------------------|-------------------------------------------------------------------------------------------------------|----------|------------|----------------------------------------------------------------------------------------------|
| None                        | None                  | None                                                                                                  | None     | None       | None                                                                                         |
| Kap114p                     | Karyopherin           | G0:00066                                                                                              | G0:00056 | G0:0008536 | Ran GTPase binding;G0:0008565 protein translocation                                          |
| histone deacetylase         | Histone deacetylase   | G0:00709                                                                                              | G0:00349 | G0:0045129 | NAD-independent histone deacetylase activity                                                 |
| hypothetical protein        | Dubious               | G0:00081                                                                                              | G0:00160 | G0:0003674 | molecular_function                                                                           |
| Rtalp                       | Protein               | G0:00081                                                                                              | G0:00003 | G0:0003674 | molecular_function                                                                           |
| Oswlp                       | Protein               | G0:00304                                                                                              | G0:00311 | G0:0003674 | molecular_function                                                                           |
| alpha-1,2-mannosidase       | Alpha-1,2-mannosidase | G0:00064                                                                                              | G0:00057 | G0:00043   | (sce)N-glycan precursor biosynthesis; (M0005)N-glycan precursor biosynthesis                 |
| cyclin C1G1                 | cyclin                | G0:00070                                                                                              | G0:00003 | G0:00165   | (sce04111)Cell cycle - yeast; (sce04113)Meiosis                                              |
| Fun14p                      | Integral              | G0:00550                                                                                              | G0:00313 | G0:0003674 | molecular_function                                                                           |
| Lst7p                       | Subunit               | G0:19042                                                                                              | G0:19908 | G0:0005096 | GTPase activator activity;G0:0030695 GTPase activator activity                               |
| hypothetical protein        | Protein               | G0:00081                                                                                              | G0:00160 | G0:0003674 | molecular_function                                                                           |
| None                        | None                  | None                                                                                                  | None     | None       | None                                                                                         |
| DNA-directed RNA polymerase | RNA polymerase        | G0:00011                                                                                              | G0:00056 | G0:00039   | (sce03020)RNA polymerase; (sce00240)Pyrimidine biosynthesis                                  |
| mitochondrial rRNA          | Mitochondrial rRNA    | G0:00325                                                                                              | G0:00057 | G0:0019843 | rRNA binding;G0:0003735 structural constituent of ribosome                                   |
| None                        | None                  | None                                                                                                  | None     | None       | None                                                                                         |
| glutathione S-transferase   | Cis-golgi             | G0:00988                                                                                              | G0:00057 | G0:0004362 | glutathione-disulfide reductase activity;G0:0004362 glutathione-disulfide reductase activity |
| Arp9p                       | Component             | G0:00427                                                                                              | G0:00165 | G0:0015616 | DNA translocase activity;G0:0008094 DNA-dependent DNA replication                            |
| Rad61p                      | Subunit               | G0:00341                                                                                              | G0:00007 | G0:0003674 | molecular_function                                                                           |
| centromeric DNA             | Kinetochore           | G0:19017                                                                                              | G0:00007 | G0:0019237 | centromeric DNA binding;G0:1990837 sequence-specific DNA binding                             |
| Mgr3p                       | Subunit               | G0:00065                                                                                              | G0:00319 | G0:0051787 | misfolded protein binding;G0:0005515 protein binding                                         |
| ribosomal protein           | Ribosomal             | G0:00000                                                                                              | G0:00226 | G0:00701   | (sce03010)Ribosome                                                                           |
| H(+)-transporter            | Subunit               | G0:00070                                                                                              | G0:00002 | G0:00469   | (sce04145)Phagosome; (sce00190)Oxidative phosphorylation                                     |
| zuotin                      | Ribosome              | G0:00000                                                                                              | G0:00058 | G0:0043022 | ribosome binding;G0:0043021 ribonucleoprotein complex                                        |
| Irc21p                      | Protein               | G0:00069                                                                                              | G0:00057 | G0:0020037 | heme binding;G0:0046906 tetrapyrrole biosynthesis                                            |
| hypothetical protein        | Putative              | G0:00081                                                                                              | G0:00055 | G0:0003674 | molecular_function                                                                           |
| hexose transporter          | High-affinity         | G0:00157                                                                                              | G0:00058 | G0:00151   | (sce04113)Meiosis - yeast                                                                    |
| ubiquitin                   | Serine/threonine      | G0:00450                                                                                              | G0:00342 | G0:00431   | (sce04136)Autophagy - other; (sce04138)Autophagy                                             |
| Msb2p                       | Mucin                 | G0:00072                                                                                              | G0:00304 | G0:00050   | (sce04011)MAPK signaling pathway - yeast                                                     |
| putative                    | Subunit               | G0:00159                                                                                              | G0:19901 | G0:00045   | (sce)Coenzyme A biosynthesis, pantothenate = pantoic acid                                    |
| Apj1p                       | Chaperone             | G0:00327                                                                                              | G0:00343 | G0:0001671 | ATPase activator activity;G0:0060590 ATPase activator activity                               |
| ribosomal protein           | Protein               | G0:00459                                                                                              | G0:00226 | G0:00198   | (sce03010)Ribosome                                                                           |
| Mpp6p                       | Nuclear               | G0:00710                                                                                              | G0:00058 | G0:00082   | (sce03018)RNA degradation                                                                    |
| None                        | None                  | None                                                                                                  | None     | None       | None                                                                                         |
| None                        | None                  | None                                                                                                  | None     | None       | None                                                                                         |
| None                        | None                  | None                                                                                                  | None     | None       | None                                                                                         |
| Ctf19p                      | Outer                 | G0:00070                                                                                              | G0:00008 | G0:0003674 | molecular_function                                                                           |
| Mia40p                      | Import                | G0:00450                                                                                              | G0:00313 | G0:0016972 | thiol oxidase activity;G0:0003756 protein import                                             |
| hypothetical protein        | Putative              | G0:00081                                                                                              | G0:00055 | G0:0003674 | molecular_function                                                                           |
| putative                    | Putative              | protein of unknown function; weak sequence similarity to bis (5'-nucleoside triphosphate) diphosphate |          |            |                                                                                              |
| Rrn11p                      | Component             | G0:00011                                                                                              | G0:00708 | G0:0001164 | RNA polymerase I CORE element sequence-specific DNA binding                                  |
| Bud6p                       | Actin                 | G0:00903                                                                                              | G0:00001 | G0:0005519 | cytoskeletal regulatory protein binding;G0:0005519 cytoskeletal regulatory protein binding   |
| hypothetical protein        | Putative              | G0:00081                                                                                              | G0:00056 | G0:0003674 | molecular_function                                                                           |
| None                        | None                  | None                                                                                                  | None     | None       | None                                                                                         |
| Bud27p                      | Unconventional        | G0:19901                                                                                              | G0:00165 | G0:0003712 | transcription coregulator activity;G0:0140                                                   |
| metallothionein             | Metallothionein       | G0:00715                                                                                              | G0:00058 | G0:0046870 | cadmium ion binding;G0:0004784 superoxide anion binding                                      |
| SUMO ligase                 | SUMO E3               | G0:00071                                                                                              | G0:00007 | G0:0019789 | SUMO transferase activity;G0:0019787 ubiquitin                                               |
| None                        | None                  | None                                                                                                  | None     | None       | None                                                                                         |
| Nellp                       | Activator             | G0:00901                                                                                              | G0:00301 | G0:0005096 | GTPase activator activity;G0:0030695 GTPase activator activity                               |
| hypothetical protein        | Putative              | G0:00081                                                                                              | G0:00055 | G0:0003674 | molecular_function                                                                           |
| seriopause                  | Protein               | G0:00315                                                                                              | G0:00092 | G0:0005199 | structural constituent of cell wall;G0:000                                                   |
| Wsc2p                       | Sensor                | G0:00315                                                                                              | G0:00433 | G0:00048   | (sce04139)Mitophagy - yeast; (sce04011)MAPK                                                  |
| None                        | None                  | None                                                                                                  | None     | None       | None                                                                                         |
| hypothetical protein        | Putative              | G0:00081                                                                                              | G0:00301 | G0:0003674 | molecular_function                                                                           |
| hypothetical protein        | Putative              | G0:00081                                                                                              | G0:00057 | G0:0003674 | molecular_function                                                                           |



rRNA (cytrRNA m5C GO:007047GO:000575GO:0009383 rRNA (cytosine-C5-)-methyltransferase acti  
homoserirL-homoserGO:000905GO:000575GO:000441(sce00270)Cysteine and methionine metabolism  
Mdj2p ConstitueGO:003015GO:00014(GO:0001671 ATPase activator activity;GO:0060590 ATPas  
hypothetiPutative GO:000815GO:000557GO:0003674 molecular\_function  
Tof1p Subunit cGO:004311GO:003125GO:0003677 DNA binding;GO:0003676 nucleic acid bindin  
None None None None None None  
None None None None None None  
beta-glucProtein iGO:000607GO:003017GO:0015926 glucosidase activity;GO:0004553 hydrolase  
hypothetiPutative GO:000815GO:001602GO:0003674 molecular\_function  
Gic1p Protein iGO:007086GO:000595GO:0017048 Rho GTPase binding;GO:0005096 GTPase activ  
cyclin PCyclin, iGO:00311(GO:00003(GO:001655(sce04111)Cell cycle - yeast  
Edc2p RNA-bindigGO:003205GO:000575GO:0003729 mRNA binding;GO:0003723 RNA binding;GO:000  
putative PredictedGO:001095GO:000557GO:0004694 eukaryotic translation initiation factor 2  
Mrx6p Protein iGO:000815GO:000575GO:0003674 molecular\_function  
GET complSubunit cGO:007181GO:004352GO:0043495 protein membrane anchor;GO:0005515 protein  
None None None None None None  
Moh1p Protein cGO:000815GO:000557GO:0046872 metal ion binding;GO:0043169 cation bindin  
Mud1p U1 snRNP GO:000035GO:000565GO:0035614 snRNA stem-loop binding;GO:0030619 U1 snRN  
None None None None None None  
malate syMalate syGO:000605GO:000951GO:000447(M00012)Glyoxylate cycle; (sce)Glyoxylate cy  
None None None None None None  
Tog1p TranscripGO:004594GO:000565GO:0000981 DNA-binding transcription factor activity,  
sepiapterPutative cytoplasmic short-chain dehydrogenase/reductase  
histone cPutative GO:00013(GO:007082GO:0032041 NAD-dependent histone deacetylase activity  
signal rCore compGO:000661GO:000575GO:000831(sce03060)Protein export  
chromatirProtein iGO:190005GO:000081GO:0001094 TFIID-class transcription factor complex b  
homeodomTranscripGO:000732GO:199052GO:004356(sce04011)MAPK signaling pathway - yeast  
None None None None None None  
Spo16p Meiosis-cGO:001052GO:000075GO:0003674 molecular\_function  
acyl carMitochoncGO:00091(GO:009912GO:000005(sce00190)Oxidative phosphorylation; (sce011  
aldehyde MitochoncGO:001941GO:000575GO:000405(sce00410)beta-Alanine metabolism; (sce00280  
GDP-Man:MannosyltGO:003357GO:000575GO:003316(sce)N-glycan precursor biosynthesis; (M0005  
replicatiSubunit cGO:000627GO:003138GO:000368(sce03430)Mismatch repair; (sce03030)DNA rep  
hypothetiPutative GO:000815GO:000557GO:0008270 zinc ion binding;GO:0046914 transition met  
tRNA thretRNA threGO:00615(GO:000574GO:0061503 tRNA threonylcarbamoyladenosine dehydratas  
thioredoThioredoGO:004226GO:000584GO:0008379 thioredoxin peroxidase activity;GO:0051920  
Ted1p GPI-glycGO:00065(GO:000575GO:0016787 hydrolase activity;GO:0003824 catalytic ac  
tRNA metAdoMet-dGO:003155GO:000575GO:0018423 protein C-terminal leucine carboxyl O-meth  
holo-[acyPhosphopGO:001806GO:000575GO:0008897 holo-[acyl-carrier-protein] synthase activ  
hypothetiProtein cGO:000815GO:000557GO:0003674 molecular\_function  
hypothetiPutative protein of unknown function  
Pff1p Multi-spGO:00065(GO:000032GO:0008237 metalloproteinase activity;GO:0070011 pepti  
Curlp Sorting iGO:00346(GO:000565GO:0051087 chaperone binding;GO:0005515 protein bindi  
Sgf29p ComponentGO:004397GO:000567GO:0001135 RNA polymerase II transcription regulator  
anaphase Subunit cGO:003114GO:000565GO:006165(sce04120)Ubiquitin mediated proteolysis; (s  
ribosomalProtein cGO:000046GO:002262GO:000375(sce03010)Ribosome  
Nhalp Na+/H+ arGO:009762GO:004512GO:0015385 sodium:proton antiporter activity;GO:00054  
putative Putative GO:00065(GO:001602GO:0004177 aminopeptidase activity;GO:0030145 mangane  
alpha-1,2Alpha-1,2GO:000005GO:000032GO:000005(sce00514)Other types of O-glycan biosynthes  
2-dehydr2-dehydrGO:003331GO:000575GO:000867(sce00770)Pantothenate and CoA biosynthesis;  
None None None None None None  
ribonuclProtein sGO:000165GO:003067GO:000452(sce03013)RNA transport  
Srf1p RegulatorGO:001604GO:000032GO:0003674 molecular\_function  
serine/thPAS-domaiGO:006091GO:000575GO:0004674 protein serine/threonine kinase activity;G

|           |           |           |           |            |                                               |
|-----------|-----------|-----------|-----------|------------|-----------------------------------------------|
| None      | None      | None      | None      | None       | None                                          |
| Hir3p     | Subunit c | G0:00719f | G0:000041 | G0:0031491 | nucleosome binding;G0:0003714 transcriptio    |
| Dlt1p     | Protein c | G0:00081f | G0:00160f | G0:0003674 | molecular_function                            |
| ubiquitin | Ubiquitin | G0:00165f | G0:00055f | G0:0004843 | thiol-dependent ubiquitin-specific proteas    |
| hypotheti | Putative  | G0:00081f | G0:00055f | G0:0003674 | molecular_function                            |
| exosome r | Nuclear c | G0:00710f | G0:00001f | G0:00001f  | (sce03018)RNA degradation                     |
| Pom152p   | Glycoprot | G0:00304f | G0:00707f | G0:0043495 | protein membrane anchor;G0:0017056 structu    |
| hypotheti | Putative  | G0:00081f | G0:00056f | G0:0003674 | molecular_function                            |
| Amelp     | Essential | G0:00345f | G0:00008f | G0:0003674 | molecular_function                            |
| Mzmlp     | Protein r | G0:00345f | G0:00057f | G0:0044183 | protein binding involved in protein foldin    |
| None      | None      | None      | None      | None       | None                                          |
| tRNA dime | Delta 2-i | G0:00615f | G0:00057f | G0:00523f  | (sce01110)Biosynthesis of secondary metaboli  |
| Atgl4p    | Autophagy | G0:00347f | G0:00342f | G0:00036f  | (sce04138)Autophagy - yeast                   |
| hypotheti | Putative  | G0:00081f | G0:00055f | G0:0003674 | molecular_function                            |
| alcohol c | Alcohol c | G0:00434f | G0:00058f | G0:00191f  | (sce00350)Tyrosine metabolism; (sce00071)Fat  |
| Mag2p     | Cytoplasm | G0:00081f | G0:00057f | G0:0046872 | metal ion binding;G0:0043169 cation bindin    |
| m-AAA pr  | Mitochond | G0:00450f | G0:00057f | G0:0004222 | metalloendopeptidase activity;G0:0008237 m    |
| hypotheti | Putative  | G0:00081f | G0:00160f | G0:0003674 | molecular_function                            |
| E3 ubiqui | RING fin  | G0:00362f | G0:00058f | G0:0043022 | ribosome binding;G0:0043021 ribonucleoprot    |
| Opt2p     | Oligopept | G0:00515f | G0:00001f | G0:0035673 | oligopeptide transmembrane transporter act    |
| snoRNA-bi | Nucleolar | G0:00004f | G0:00343f | (Human)G   | (sce03008)Ribosome biogenesis in eukaryotes   |
| hypotheti | Putative  | G0:00081f | G0:00055f | G0:0003674 | molecular_function                            |
| None      | None      | None      | None      | None       | None                                          |
| Sea4p     | Subunit c | G0:19042f | G0:00970f | G0:0003674 | molecular_function                            |
| inositol  | Inositol  | G0:00527f | G0:00056f | G0:00352f  | (sce00562)Inositol phosphate metabolism; (sc  |
| None      | None      | None      | None      | None       | None                                          |
| Zds2p     | Protein v | G0:00109f | G0:00059f | G0:0003674 | molecular_function                            |
| translati | Catalytic | G0:00064f | G0:00320f | G0:00313f  | (sce03013)RNA transport                       |
| Rcolp     | Essential | G0:00601f | G0:00322f | G0:0046872 | metal ion binding;G0:0043169 cation bindin    |
| Smilp     | Protein i | G0:00329f | G0:00433f | G0:0003677 | DNA binding;G0:0003676 nucleic acid bindin    |
| ATP-deper | 3' -5' DN | G0:00007f | G0:00056f | G0:0043140 | ATP-dependent 3' -5' DNA helicase activity;   |
| Tgl5p     | Bifunctio | G0:00066f | G0:00058f | G0:0042171 | lysophosphatidic acid acyltransferase acti    |
| None      | None      | None      | None      | None       | None                                          |
| RNA-bind  | Essential | G0:00000f | G0:00306f | G0:0003729 | mRNA binding;G0:0003723 RNA binding;G0:000    |
| None      | None      | None      | None      | None       | None                                          |
| None      | None      | None      | None      | None       | None                                          |
| seripaup  | Member of | G0:00315f | G0:00092f | G0:0005199 | structural constituent of cell wall;G0:000    |
| None      | None      | None      | None      | None       | None                                          |
| None      | None      | None      | None      | None       | None                                          |
| hypotheti | Putative  | G0:00081f | G0:00055f | G0:0003674 | molecular_function                            |
| threonine | Threonine | G0:00065f | G0:00057f | G0:00047f  | (sce)Isoleucine biosynthesis, threonine => 2- |
| S-adenosy | Protein l | G0:00064f | G0:00055f | G0:0008757 | S-adenosylmethionine-dependent methyltrans    |
| Esflp     | Nucleolar | G0:00063f | G0:00057f | G0:0003723 | RNA binding;G0:0003676 nucleic acid bindin    |
| dolichyl- | Protein ( | G0:00717f | G0:00975f | G0:00041f  | (sce00515)Mannose type O-glycan biosynthesis  |
| ribosomal | Ribosomal | G0:00000f | G0:00226f | G0:00037f  | (sce03010)Ribosome                            |
| putative  | Essential | G0:00987f | G0:00058f | G0:0031624 | ubiquitin conjugating enzyme binding;G0:00    |
| Uba4p     | E1-like i | G0:20002f | G0:00058f | G0:00422f  | (sce04122)Sulfur relay system                 |
| None      | None      | None      | None      | None       | None                                          |
| None      | None      | None      | None      | None       | None                                          |
| glucose s | Plasma m  | G0:00515f | G0:00058f | G0:00053f  | (sce04113)Meiosis - yeast                     |
| Yip4p     | Protein t | G0:00081f | G0:00001f | G0:0017137 | Rab GTPase binding;G0:0017016 Ras GTPase b    |
| Isa2p     | Protein r | G0:00091f | G0:00057f | G0:0051537 | 2 iron, 2 sulfur cluster binding;G0:005153'   |
| protein t | Essential | G0:00301f | G0:00014f | G0:0051087 | chaperone binding;G0:0030674 protein bindi    |
| securin   | Securin;  | G0:00011f | G0:00058f | G0:00198f  | (sce04111)Cell cycle - yeast; (sce04113)Meio  |

ubiquitin ESCRT-I cGO:19046fGO:000081GO:00431f (sce04144) Endocytosis  
 ubiquitin Ubiquitin cGO:000651GO:00057fGO:0031624 ubiquitin conjugating enzyme binding;GO:00  
 recombination Meiosis cGO:00007fGO:00007fGO:00420f (sce04113) Meiosis - yeast  
 bifunctional High-affinity cGO:19019fGO:00057fGO:0015489 putrescine transmembrane transporter activ  
 mRNA splice Protein cGO:00003fGO:00710fGO:00003f (sce03040) Spliceosome  
 Apm1p Mul-like cGO:00068fGO:00301fGO:00302f (Human) (hsa04142) Lysosome  
 ribosomal Protein cGO:00064fGO:00226fGO:00037f (sce03010) Ribosome  
 orotate pMajor or cGO:00442fGO:00056fGO:00045f (sce) Uridine monophosphate biosynthesis, glu  
 putative Putative cGO:00000fGO:00057fGO:0000026 alpha-1,2-mannosyltransferase activity;GO:  
 Hxt14p Protein vGO:00157fGO:00003fGO:0005354 galactose transmembrane transporter activi  
 hypothetic Putative cGO:00081fGO:00055fGO:0003674 molecular\_function  
 transcripTFIIA smcGO:00511fGO:00056fGO:00170f (sce03022) Basal transcription factors  
 Arf family Dubious cGO:00312fGO:00057fGO:00154f (sce03060) Protein export; (sce04145) Phagosome  
 SF3a splice Subunit cGO:00003fGO:00710fGO:00082f (sce03040) Spliceosome  
 Cym1p Lysine-s cGO:00164fGO:00057fGO:0004222 metalloendopeptidase activity;GO:0008237 m  
 hypothetic Putative cGO:00081fGO:00055fGO:0003674 molecular\_function  
 Meolp Putative cGO:00081fGO:00057fGO:0003674 molecular\_function  
 ribosomal Ribosomal cGO:19901fGO:00306fGO:00037f (sce03010) Ribosome  
 protein-farnesyl cGO:00064fGO:00056fGO:00046f (sce00900) Terpenoid backbone biosynthesis; (c  
 Tom40p Component cGO:00301fGO:00057fGO:00152f (Human) (hsa05014) Amyotrophic lateral sclerosis  
 putative Putative cGO:00094fGO:00058fGO:00084f (sce00750) Vitamin B6 metabolism; (sce01100) M  
 None None None None None None  
 mitochondria Highly cGO:00068fGO:00313fGO:0050833 pyruvate transmembrane transporter activit  
 type 2C pType 2C pGO:00001fGO:00056fGO:1990439 MAP kinase serine/threonine phosphatase ac  
 Rnh70p 3'-5' excGO:00344fGO:00056fGO:00001f (sce03008) Ribosome biogenesis in eukaryotes  
 Edelp Scaffold cGO:00324fGO:00304fGO:00431f (sce04144) Endocytosis  
 ubiquitin Ubiquitin cGO:00347fGO:00466fGO:0004843 thiol-dependent ubiquitin-specific proteas  
 DNA-directed DNA polymGO:00063fGO:00056fGO:00038f (sce03450) Non-homologous end-joining  
 hypothetic Putative cGO:00081fGO:00055fGO:0003674 molecular\_function  
 Pet127p Protein vGO:00009fGO:00057fGO:0003674 molecular\_function  
 hypothetic Putative cGO:00081fGO:00160fGO:0003674 molecular\_function  
 Mcp1p Mitochondria cGO:00550fGO:00325fGO:0003674 molecular\_function  
 Tif1lp TranslatiGO:00017fGO:00332fGO:00430f (sce03013) RNA transport  
 1,3-beta-1,3-beta- cGO:00719fGO:00092fGO:0042124 1,3-beta-glucanosyltransferase activity;GO  
 hypothetic Putative cGO:00081fGO:00057fGO:0003674 molecular\_function  
 DNA-directed RNA polymGO:00011fGO:00056fGO:00039f (sce03020) RNA polymerase; (sce00240) Pyrimidin  
 ribosomal Ribosomal cGO:00021fGO:00226fGO:00198f (sce03010) Ribosome  
 Cft1p RNA-bindiGO:00987fGO:00058fGO:00037f (sce03015) mRNA surveillance pathway  
 None None None None None None  
 Ivy1p PhospholiGO:00421fGO:00003fGO:0005543 phospholipid binding;GO:0008289 lipid bind  
 Ast1p Lipid rafGO:00325fGO:00057fGO:0016491 oxidoreductase activity;GO:0003824 catalyt  
 DNA repliSubunit cGO:00007fGO:00711fGO:0043138 3'-5' DNA helicase activity;GO:0003678 DNA  
 H(+)-trarSubunit fGO:00070fGO:00002fGO:00469f (sce04145) Phagosome; (sce00190) Oxidative pho  
 ribosomal Protein cGO:00000fGO:00306fGO:00085f (sce03010) Ribosome  
 hypothetic Putative transcription factor containing a WOPR domain; binds DNA in vitro; simi  
 Gcr2p TranscripGO:00723fGO:00056fGO:0001102 RNA polymerase II activating transcription  
 H(+)-trarVacuolar cGO:00070fGO:00002fGO:0042625 ATPase coupled ion transmembrane transport  
 DNA-bindEssentialGO:00723fGO:00701fGO:0001094 TFIID-class transcription factor complex b  
 Rcr2p Vacuolar cGO:00161fGO:00003fGO:0003674 molecular\_function  
 None None None None None None  
 Taf6p Subunit cGO:00511fGO:00466fGO:00162f (sce03022) Basal transcription factors  
 Tar1p Dubious cGO:00434fGO:00057fGO:0003674 molecular\_function  
 ribosomal Protein cGO:00004fGO:00226fGO:00037f (sce03010) Ribosome  
 glycerol Glycerol cGO:00195fGO:00058fGO:00479f (sce00561) Glycerolipid metabolism; (sce01100)

double-stranded DNA-dependent ATPase activity; GO:003204 (GO:000575; GO:0033676) double-stranded DNA-dependent ATPase activity; GO:000911 (GO:000575; GO:000414; (sce00780) Biotin metabolism; (sce01100) Metabolic process; GO:000815 (GO:000557; GO:0003674) molecular\_function

hypothetical protein GO:000815 (GO:000575; GO:0005509) calcium ion binding; GO:0046872 metal ion binding

Met18p Component GO:009742 (GO:009736; GO:0003674) molecular\_function

putative Putative GO:001584 (GO:000562; GO:0004674) protein serine/threonine kinase activity; GO:000562

None None None None None None

methionine Methionine GO:003555 (GO:001049; GO:0070006) metalloaminopeptidase activity; GO:0004177 (GO:000215; GO:002262; GO:000375; (sce03010) Ribosome

ribosomal Ribosomal GO:000215 (GO:002262; GO:000375; (sce03010) Ribosome

Cbt1p Protein GO:004825 (GO:000575; GO:0003674) molecular\_function

hypothetical protein GO:001631 (GO:000562; GO:0016791) phosphatase activity; GO:0042578 phosphoric anhydride hydrolase activity; GO:000562

None None None None None None

Fmp25p Protein GO:003455 (GO:003131; GO:0003674) molecular\_function

Pbp2p RNA binding GO:000072 (GO:000562; GO:0003729) mRNA binding; GO:0003723 RNA binding; GO:0003723

Ahclp Subunit GO:199041 (GO:000562; GO:0004402) histone acetyltransferase activity; GO:0004402

None None None None None None

Etp1p Protein GO:004547 (GO:000575; GO:000815; (Human) (hsa04014) Ras signaling pathway

indolepyruvate Major of GO:000094 (GO:000582; GO:005017; (sce00010) Glycolysis / Gluconeogenesis; (sce00010)

Vam7p Vacuolar GO:006119 (GO:000032; GO:003226; (sce04130) SNARE interactions in vesicular transport

Shglp Subunit GO:005156 (GO:004818; GO:0042800) histone methyltransferase activity (H3-K4 methyltransferase activity)

cohesin Subunit GO:000715 (GO:003499; GO:001688; (sce04111) Cell cycle - yeast; (sce04113) Meiosis

Nkplp Central GO:005132 (GO:000077; GO:0003674) molecular\_function

anaphase Subunit GO:004584 (GO:000562; GO:001990; (sce04120) Ubiquitin mediated proteolysis; (sce04120)

palmitoyl Palmitoyl GO:001822 (GO:000575; GO:0019706) protein-cysteine S-palmitoyltransferase activity; GO:0019706

hypothetical Putative GO:000815 (GO:001602; GO:0003674) molecular\_function

hypothetical Putative GO:000815 (GO:000557; GO:0003674) molecular\_function

Tma19p Protein GO:000215 (GO:001049; GO:0043023) ribosomal large subunit binding; GO:0043024

None None None None None None

PAQR-type Plasma membrane GO:000688 (GO:000032; GO:003802; (Human) (hsa04920) Adipocytokine signaling pathway

mRNA guanylyltransferase GO:000637 (GO:003155; GO:0004484) mRNA guanylyltransferase activity; GO:000815

ADP/ATP Mitochondrion GO:001586 (GO:000574; GO:0005471) ATP:ADP antiporter activity; GO:0015217 ADP/ATP antiporter activity; GO:0015217

None None None None None None

sulfonate Fe(II)-dependent GO:004633 (GO:000575; GO:0000907) sulfonate dioxygenase activity; GO:0000908

cyclin-dependent Cyclin-dependent GO:004571 (GO:199086; GO:000469; (sce04138) Autophagy - yeast; (sce04111) Cell cycle

None None None None None None

hypothetical protein GO:000075 (GO:007039; GO:0003690) double-stranded DNA binding; GO:0003723 RNA binding

Urn1p Protein GO:004525 (GO:000562; GO:0003723) RNA binding; GO:0003676 nucleic acid binding

TORC2 component Subunit GO:003095 (GO:003195; GO:0005085) guanyl-nucleotide exchange factor activity

protein Regulator GO:009026 (GO:000015; GO:000472; (sce03015) mRNA surveillance pathway; (sce04111) mRNA surveillance pathway; (sce04111)

Golgi transport Component GO:003225 (GO:001711; GO:0003674) molecular\_function

Aim46p Protein GO:000815 (GO:000575; GO:0016872) intramolecular lyase activity; GO:0016853 intramolecular lyase activity; GO:0016853

ubiquitin Ubiquitin GO:003157 (GO:003217; GO:0004842) ubiquitin-protein transferase activity; GO:0004842

RNA-binding Subunit GO:000661 (GO:000575; GO:000831; (sce03060) Protein export

Bre5p Ubiquitin GO:003451 (GO:199086; GO:000372; (sce04139) Mitophagy - yeast

Met31p Zinc-finger GO:003133 (GO:000562; GO:0000987) proximal promoter sequence-specific DNA binding

alpha-ketoglutarate Subunit GO:000611 (GO:000935; GO:000459; (sce00310) Lysine degradation; (sce00380) Tryptophan degradation; (sce00380)

mitochondrion Mitochondrion GO:003254 (GO:000576; GO:000375; (sce03010) Ribosome

dodecenoyl Peroxisome GO:000665 (GO:000575; GO:000416; (sce00071) Fatty acid degradation; (sce04146) Fatty acid degradation; (sce04146)

gluconokinase Putative GO:004617 (GO:000032; GO:004631; (sce00030) Pentose phosphate pathway; (sce01200) Pentose phosphate pathway; (sce01200)

Sec63 component Essential GO:003121 (GO:003121; GO:000856; (sce03060) Protein export; (sce04141) Protein export; (sce04141)

cytochrome Mitochondrion GO:004274 (GO:000575; GO:0004130) cytochrome-c peroxidase activity; GO:000460

RNA-binding Essential GO:000047 (GO:000575; GO:0001671) ATPase activator activity; GO:0060590 ATPase activator activity; GO:0060590

thioredoxin Cytoplasm GO:001945 (GO:000575; GO:000475; (sce00450) Selenocompound metabolism; (sce00200) Selenocompound metabolism; (sce00200)

signal peptide Subunit GO:000646 (GO:000575; GO:000825; (sce03060) Protein export

putative Putative GO:000597GO:000565GO:0004722 protein serine/threonine phosphatase activ  
 Mic26p ComponentGO:00424(GO:006161GO:0003674 molecular\_function  
 ADP/ATP cMitochondGO:00158(GO:000574GO:0005471 ATP:ADP antiporter activity;GO:0015217 ADP  
 bifuncticEnzyme oGO:00061(GO:000582GO:00039(M00048)Inosine monophosphate biosynthesis, l  
 None None None None None None  
 hypothetiProtein cGO:00081(GO:001602GO:0003674 molecular\_function  
 None None None None None None  
 None None None None None None  
 hypothetiPutative GO:00081(GO:000557GO:0003674 molecular\_function  
 putative Putative GO:000002GO:00057(GO:0008408 3'-5' exonuclease activity;GO:0004527 exon  
 tyrosine Dual specGO:00000(GO:001049GO:1990275 preribosome binding;GO:0008138 protein tyr  
 hypothetiPutative GO:00081(GO:000578GO:0003674 molecular\_function  
 None None None None None None  
 None None None None None None  
 oligo-1,(Alpha-gluGO:000002GO:00057(GO:000457(sce00052)Galactose metabolism; (sce00500)St  
 None None None None None None  
 hypothetiPutative GO:00550(GO:000578GO:0022857 transmembrane transporter activity;GO:0005  
 phosphopEnolase, GO:00060(GO:000001GO:00046(M00002)Glycolysis, core module involving th  
 Mdm35p MitochondGO:00453(GO:00057(GO:0005515 protein binding;GO:0005488 binding;GO:0003  
 Tvp38p Integral GO:000002GO:003017GO:0003674 molecular\_function  
 Api2p Putative GO:00081(GO:000557GO:0003674 molecular\_function  
 sulfate pHigh affiGO:19023(GO:000588GO:0008271 secondary active sulfate transmembrane tra  
 None None None None None None  
 SKI complSki complGO:007047GO:00550(GO:000367(sce03018)RNA degradation  
 Rbg2p Protein vGO:19038(GO:00057(GO:0005525 GTP binding;GO:0032550 purine ribonucleosi  
 S-adenosS-adenosGO:001801GO:00057(GO:0071885 N-terminal protein N-methyltransferase act  
 ribosomalProtein cGO:000002GO:002262GO:001984(sce03010)Ribosome  
 mitochondMitochondGO:003254GO:00057(GO:00037(sce03010)Ribosome  
 sterol esSteryl esGO:00000(GO:000588GO:0004771 sterol esterase activity;GO:0016298 lipase  
 Rts2p Basic zirGO:00062(GO:00056(GO:0008270 zinc ion binding;GO:0003690 double-strande  
 metallo-cPutative GO:00081(GO:000582GO:0003876 AMP deaminase activity;GO:0047623 adenosin  
 DNA repaiNucleoticGO:000071GO:000011GO:0008094 DNA-dependent ATPase activity;GO:0003684 d  
 Pml1p Subunit cGO:00512(GO:007027GO:0003729 mRNA binding;GO:0003723 RNA binding;GO:000  
 None None None None None None  
 Tgl4p MultifuncGO:000664GO:000581GO:004749(sce00592)alpha-Linolenic acid metabolism; (c  
 None None None None None None  
 hypothetiPutative GO:00081(GO:000557GO:0003674 molecular\_function  
 Spo22p Meiosis-cGO:009017GO:000079GO:0003674 molecular\_function  
 cyclin-dCyclin-dGO:00603(GO:00003(GO:006157(sce04111)Cell cycle - yeast  
 None None None None None None  
 uracil pPlasma meGO:19037(GO:000032GO:0015505 uracil:cation symporter activity;GO:001521  
 hypothetiPutative GO:00081(GO:000578GO:0003674 molecular\_function  
 aspartateAspartic GO:00090(GO:000588GO:000407(sce00261)Monobactam biosynthesis; (M00018)Ti  
 ribosomalProtein cGO:000047GO:002262GO:00037(sce03010)Ribosome  
 hypothetiPutative GO:00081(GO:00056(GO:0003674 molecular\_function  
 serine/thDual-specGO:00070(GO:000077GO:000471(sce04111)Cell cycle - yeast  
 S-formylEsterase GO:00462(GO:000582GO:00187(sce00680)Methane metabolism; (sce01200)Carb  
 translocSubunit cGO:00312(GO:00712(GO:00154(sce03060)Protein export; (sce04145)Phagosom  
 Tad3p Subunit cGO:00021(GO:005271GO:0052717 tRNA-specific adenosine-34 deaminase activ  
 hypothetiPutative GO:00081(GO:00319(GO:0003674 molecular\_function  
 None None None None None None  
 hypothetiDubious cGO:00081(GO:001602GO:0003674 molecular\_function  
 Rad23p Protein vGO:00304(GO:000011GO:00002(sce03420)Nucleotide excision repair; (sce04  
 None None None None None None

RNA lariat RNA lariat GO:000712 GO:000562 GO:0008419 RNA lariat debranching enzyme activity; GO:000562  
 casein kinase beta regulatory GO:000632 GO:003442 GO:003022 (sce04139) Mitophagy - yeast; (sce03008) Ribosome  
 None None None None None None  
 pheromone Pheromone GO:004542 GO:000032 GO:0015035 protein disulfide oxidoreductase activity; GO:000562  
 mitochondrial Mitochondrial GO:003252 GO:000572 GO:0003735 structural constituent of ribosome; GO:000562  
 bifunctional Enzyme of GO:000612 GO:000582 GO:000462 (M00048) Inosine monophosphate biosynthesis, 1  
 Aim4p Protein GO:000812 GO:000572 GO:0003674 molecular\_function  
 None None None None None None  
 D-amino acid D-Amino acid GO:007042 GO:000562 GO:004782 (sce00360) Phenylalanine metabolism  
 Pcl5p Cyclin; GO:001622 GO:000032 GO:001652 (sce04138) Autophagy - yeast  
 Dsc2p Multi-tran GO:000812 GO:004462 GO:0003674 molecular\_function  
 N-terminal AdoMet-dependent GO:001802 GO:000582 GO:0071885 N-terminal protein N-methyltransferase activity  
 None None None None None None  
 hypothetical Putative GO:000812 GO:000557 GO:0003674 molecular\_function  
 hypothetical Putative GO:001572 GO:000032 GO:0015499 formate transmembrane transporter activity  
 trifunctional Uridine GO:000622 GO:000582 GO:004542 (sce00760) Nicotinate and nicotinamide metabolism  
 GTP cycle GTP-cycle GO:003592 GO:000562 GO:000392 (M00126) Tetrahydrofolate biosynthesis, GTP =  
 hypothetical Putative GO:000812 GO:001602 GO:0003674 molecular\_function  
 Mig3p Transcription GO:001072 GO:000072 GO:0001227 DNA-binding transcription repressor activity  
 Psp1p Asn and GO:000812 GO:000092 GO:0003729 mRNA binding; GO:0003723 RNA binding; GO:0003723  
 None None None None None None  
 dolichol Dolichol GO:004302 GO:003012 GO:000412 (sce00510) N-Glycan biosynthesis; (sce01100) M  
 Cms1p Putative GO:000812 GO:003062 GO:0003674 molecular\_function  
 RNA exon Putative GO:009032 GO:000572 GO:0004527 exonuclease activity; GO:0004519 endonuclease  
 multifunctional 5' to 3' GO:000072 GO:000572 GO:190412 (sce03450) Non-homologous end-joining; (sce03450)  
 ubiquitin Ubiquitin GO:001932 GO:004322 GO:004312 (sce04120) Ubiquitin mediated proteolysis; (sce04120)  
 hypothetical Putative GO:000812 GO:000557 GO:0003674 molecular\_function  
 Taf10p Subunit GO:005112 GO:004662 GO:001622 (sce03022) Basal transcription factors  
 mitogen-activated Cdc42p-activated GO:199082 GO:004332 GO:004402 (sce04392) Hippo signaling pathway -multiple  
 hypothetical Putative protein of unknown function; green fluorescent protein (GFP)-fusion protein  
 Nop16p Constituent GO:004222 GO:003062 GO:0003674 molecular\_function  
 Lag2p Protein GO:005142 GO:000572 GO:0003674 molecular\_function  
 Bur2p Cyclin dependent GO:005152 GO:000032 GO:0016538 cyclin-dependent protein serine/threonine kinase  
 DNA-directed RNA polymerase GO:004272 GO:000562 GO:000102 (sce03020) RNA polymerase; (sce00240) Pyrimidine  
 ribosomal Ribosomal GO:000212 GO:002262 GO:000372 (sce03010) Ribosome  
 Elongator Subunit GO:000202 GO:003352 GO:0000049 tRNA binding; GO:0003723 RNA binding; GO:0003723  
 aminopeptidase Mitochondrial GO:005082 GO:003132 GO:0004177 aminopeptidase activity; GO:0030145 manganese  
 Nop6p rRNA-binding GO:004222 GO:003062 GO:0030515 snoRNA binding; GO:0019843 rRNA binding; GO:0019843  
 putative Putative GO:000642 GO:000572 GO:0000033 alpha-1,3-mannosyltransferase activity; GO:000572  
 3-methyl-Ketopantoin GO:001592 GO:000572 GO:000382 (sce00770) Pantothenate and CoA biosynthesis;  
 putative Protein GO:000652 GO:000582 GO:0043022 ribosome binding; GO:0043021 ribonucleoprotein  
 hypothetical Putative GO:001932 GO:000557 GO:0003674 molecular\_function  
 None None None None None None  
 Rab family Rab family GO:199022 GO:003402 GO:000012 (Human) (hsa05134) Legionellosis  
 hypothetical Protein GO:000812 GO:000582 GO:0003674 molecular\_function  
 Nvj2p Lipid-binding GO:000682 GO:007152 GO:0043022 ribosome binding; GO:0043021 ribonucleoprotein  
 ribosomal Ribosomal GO:000642 GO:002262 GO:000372 (sce03010) Ribosome  
 hypothetical Putative GO:000812 GO:000557 GO:0003674 molecular\_function  
 Ssy1p Component GO:190382 GO:000572 GO:0015181 arginine transmembrane transporter activity  
 Cef1p Essential GO:000032 GO:007102 GO:000032 (sce03040) Spliceosome  
 Aim32p Protein GO:000812 GO:000557 GO:0003674 molecular\_function  
 hypothetical Putative GO:000812 GO:000572 GO:0003674 molecular\_function  
 Rrn6p Component GO:000112 GO:007082 GO:0001164 RNA polymerase I CORE element sequence-specific  
 Nip100p Large subunit GO:000012 GO:000022 GO:0003774 motor activity; GO:0008017 microtubule binding

Rrt6p Putative GO:000815GO:001602GO:0003674 molecular\_function  
Vps68p Vacuolar GO:003251GO:003442GO:0003674 molecular\_function  
None None None None None None  
hypothetiPutative GO:000684GO:000574GO:0022857 transmembrane transporter activity;GO:0005  
oxygen-deProtoporGO:000675GO:00313(GO:000472(sce00860)Porphyrin and chlorophyll metaboli  
putative EssentialGO:00311(GO:003068GO:0052909 18S rRNA (adenine(1779)-N(6)/adenine(1780)-  
SUMO ligSUMO E3 GO:199068GO:000079GO:0019789 SUMO transferase activity;GO:0019787 ubiqu  
septin CComponentGO:000092GO:000014GO:001031(Human)(hsa05100)Bacterial invasion of epith  
Snt309p Member ofGO:000035GO:00710(GO:0000384 first spliceosomal transesterification act  
Cexlp ComponentGO:00064(GO:000564GO:0000049 tRNA binding;GO:0003723 RNA binding;GO:000  
GMP syntGMP syntGO:000617GO:000582GO:000392(sce)Guanine ribonucleotide biosynthesis IMP  
Hsp90 coChaperoneGO:000045GO:000565GO:0051082 unfolded protein binding;GO:0005515 protei  
ribosomalRibosomalGO:000215GO:003068GO:001984(sce03010)Ribosome  
nucleosicHigh affiGO:003425GO:000032GO:003425(Human)(hsa05034)Alcoholism  
phosphatiProtein iGO:00065(GO:00005(GO:001717(sce00563)Glycosylphosphatidylinositol (GPI)-  
NADHX deWidely-coGO:004645GO:000575GO:0047453 ATP-dependent NAD(P)H-hydrate dehydratase  
DNA 5'-acDNA 5' AMGO:000001GO:000565GO:0033699 DNA 5'-adenosine monophosphate hydrolase a  
coatomer Delta suGO:004831GO:003012GO:0003674 molecular\_function  
hypothetiPutative GO:000815GO:000557GO:0003674 molecular\_function  
prohibitiSubunit cGO:00013(GO:199042GO:0003674 molecular\_function  
None None None None None None  
uroporphyUroporphyGO:000675GO:000557GO:000485(sce00860)Porphyrin and chlorophyll metaboli  
lysophosBroad-spGO:004647GO:000578GO:004718(sce00565)Ether lipid metabolism;(sce00561)(  
Rab GTPasEssentialGO:009052GO:000562GO:0017137 Rab GTPase binding;GO:0017016 Ras GTPase b  
hypothetiProtein cGO:000815GO:000557GO:0003674 molecular\_function  
Rtc5p Protein cGO:000815GO:000575GO:0003674 molecular\_function  
None None None None None None  
Gfdlp Coiled-coGO:00064(GO:000564GO:0003674 molecular\_function  
RNA-binditGTPase tGO:000005GO:003068GO:000392(sce03008)Ribosome biogenesis in eukaryotes  
Y' elemerPutative GO:000815GO:000557GO:0004386 helicase activity;GO:0017111 nucleoside-tr  
None None None None None None  
ribosomalProtein cGO:00064(GO:002262GO:007018(sce03010)Ribosome  
hypothetiPutative GO:000815GO:000557GO:0003674 molecular\_function  
Ilmlp Protein cGO:00000(GO:000578GO:0003674 molecular\_function  
hypothetiPutative GO:004594GO:000565GO:0000981 DNA-binding transcription factor activity,  
protein tMitochonGO:004505GO:004271GO:0008565 protein transporter activity;GO:0005215 tr  
translatiBeta subGO:000175GO:004361GO:003136(sce03013)RNA transport  
borate tMultidrugGO:003544GO:000577GO:0080139 borate efflux transmembrane transporter ac  
hypothetiPutative GO:007096GO:000575GO:0043022 ribosome binding;GO:0043021 ribonucleoprot  
ribosome-MitochonGO:003455GO:000574GO:004302(sce04139)Mitophagy - yeast  
Kiplp Kinesin-rGO:003054GO:000587GO:0008574 ATP-dependent microtubule motor activity,  
NAD-deperNAD(+)-deGO:007157GO:190237GO:001715(sce00760)Nicotinate and nicotinamide metabo  
Cox20p MitochonGO:003361GO:000574GO:0051082 unfolded protein binding;GO:0005515 protei  
hypothetiPutative GO:000815GO:000032GO:0003674 molecular\_function  
Ca(2+)/MrHigh affiGO:003002GO:000015GO:0015410 manganese-transporting ATPase activity;GO:  
NuA4 histCatalyticGO:00012(GO:003277GO:001048(Human)(hsa05166)HTLV-I infection  
None None None None None None  
chaperoneMember ofGO:003497GO:007254GO:0003674 molecular\_function  
Mcxlp Non-protGO:190428GO:000574GO:0004176 ATP-dependent peptidase activity;GO:004262  
DEAH-box RNA-deperGO:000034GO:00710(GO:003445(sce03040)Spliceosome  
omega-clOmega-clGO:009886GO:000577GO:0045174 glutathione dehydrogenase (ascorbate) acti  
H(+)-trarSubunit fGO:19029(GO:000022GO:004696(sce04145)Phagosome;(sce00190)Oxidative pho  
ssRNA excNuclear fGO:19014(GO:000575GO:000455(sce03018)RNA degradation;(sce03008)Ribosom  
Spo75p Meiosis-sGO:003047GO:000588GO:0005227 calcium activated cation channel activity;

|              |                                                                                  |                                                                         |            |                                                    |                                               |
|--------------|----------------------------------------------------------------------------------|-------------------------------------------------------------------------|------------|----------------------------------------------------|-----------------------------------------------|
| None         | None                                                                             | None                                                                    | None       | None                                               | None                                          |
| putative     | Putative                                                                         | G0:005101                                                               | G0:000565  | G0:0008568                                         | microtubule-severing ATPase activity;G0:00    |
| Taf2p        | TFIID sub                                                                        | G0:005112                                                               | G0:000566  | G0:001625                                          | (sce03022)Basal transcription factors         |
| bifunctional | 3-hydroxy                                                                        | G0:000665                                                               | G0:000577  | G0:000430                                          | (Human) (M00104)Bile acid biosynthesis, chole |
| GTPase       | GMitochondr                                                                      | G0:004572                                                               | G0:000576  | G0:0043022                                         | ribosome binding;G0:0043021 ribonucleoprot    |
| ribosomal    | Protein                                                                          | G0:000641                                                               | G0:002262  | G0:000375                                          | (sce03010)Ribosome                            |
| hypothetical | Putative                                                                         | G0:000815                                                               | G0:000557  | G0:0003674                                         | molecular_function                            |
| Elongator    | Subunit                                                                          | G0:000205                                                               | G0:003358  | G0:0000993                                         | RNA polymerase II complex binding;G0:00431    |
| hypothetical | Putative                                                                         | protein of unknown function; conserved in A. gossypii; the authentic, n |            |                                                    |                                               |
| None         | None                                                                             | None                                                                    | None       | None                                               | None                                          |
| None         | None                                                                             | None                                                                    | None       | None                                               | None                                          |
| tubulin      | Subunit                                                                          | G0:000702                                                               | G0:001627  | G0:0044183                                         | protein binding involved in protein foldin    |
| histone      | Histone                                                                          | G0:190332                                                               | G0:004818  | G0:004280                                          | (sce00310)Lysine degradation                  |
| None         | None                                                                             | None                                                                    | None       | None                                               | None                                          |
| None         | None                                                                             | None                                                                    | None       | None                                               | None                                          |
| hypothetical | Putative                                                                         | G0:000815                                                               | G0:000557  | G0:0003674                                         | molecular_function                            |
| None         | None                                                                             | None                                                                    | None       | None                                               | None                                          |
| deoxycyti    | Deoxycyti                                                                        | G0:007095                                                               | G0:000565  | G0:0017125                                         | deoxycytidyl transferase activity;G0:00038    |
| Sgplp        | Component                                                                        | G0:003405                                                               | G0:000077  | G0:000367                                          | (sce04113)Meiosis - yeast                     |
| hypothetical | Putative                                                                         | G0:000815                                                               | G0:000557  | G0:0003674                                         | molecular_function                            |
| Env10p       | Protein involved in SRP-independent targeting of substrates to the ER; component |                                                                         |            |                                                    |                                               |
| Elglp        | Subunit                                                                          | G0:001052                                                               | G0:003135  | G0:0003682                                         | chromatin binding;G0:0003677 DNA binding;G    |
| methionyl    | Methionyl                                                                        | G0:007195                                                               | G0:000575  | G0:000447                                          | (sce00670)One carbon pool by folate; (sce009  |
| hypothetical | Protein                                                                          | G0:000815                                                               | G0:000557  | G0:0003674                                         | molecular_function                            |
| origin re    | Subunit                                                                          | G0:000626                                                               | G0:000566  | G0:000368                                          | (sce04111)Cell cycle - yeast; (sce04113)Meio  |
| arginase     | Arginase,                                                                        | G0:009036                                                               | G0:004335  | G0:009036                                          | (sce)Polyamine biosynthesis, arginine => orn  |
| transcrip    | Subunit                                                                          | G0:004275                                                               | G0:000012  | G0:0001002                                         | RNA polymerase III type 1 promoter sequenc    |
| ribosomal    | Ribosomal                                                                        | G0:000002                                                               | G0:002262  | G0:001982                                          | (sce03010)Ribosome                            |
| Spc42p       | Central                                                                          | G0:003047                                                               | G0:0005821 | intermediate layer of spindle pole body;G0:0005823 |                                               |
| Mrx9p        | Protein                                                                          | G0:000815                                                               | G0:003196  | G0:0003674                                         | molecular_function                            |
| Snf1lp       | Subunit                                                                          | G0:004592                                                               | G0:001651  | G0:0015616                                         | DNA translocase activity;G0:0008094 DNA-de    |
| translati    | Beta sub                                                                         | G0:000642                                                               | G0:003202  | G0:000372                                          | (sce03013)RNA transport                       |
| Bud9p        | Protein                                                                          | G0:000025                                                               | G0:000595  | G0:0003674                                         | molecular_function                            |
| orotidine    | Orotidine                                                                        | G0:004420                                                               | G0:000582  | G0:000455                                          | (sce)Uridine monophosphate biosynthesis, glu  |
| None         | None                                                                             | None                                                                    | None       | None                                               | None                                          |
| Sec1p        | Sm-like                                                                          | G0:003132                                                               | G0:000595  | G0:0000149                                         | SNARE binding;G0:0005515 protein binding;G    |
| leucine      | Zinc-knu                                                                         | G0:200127                                                               | G0:000565  | G0:0001227                                         | DNA-binding transcription repressor activi    |
| None         | None                                                                             | None                                                                    | None       | None                                               | None                                          |
| hypothetical | Putative                                                                         | G0:000815                                                               | G0:000557  | G0:0003674                                         | molecular_function                            |
| dolichyl     | Protein                                                                          | G0:190010                                                               | G0:009758  | G0:000416                                          | (sce00515)Mannose type O-glycan biosynthesis  |
| zinc fin     | Essential                                                                        | G0:000008                                                               | G0:000565  | G0:0061770                                         | translation elongation factor binding;G0:0    |
| putative     | DDHD dom                                                                         | G0:003202                                                               | G0:000575  | G0:0004620                                         | phospholipase activity;G0:0016298 lipase a    |
| Coa6p        | Protein                                                                          | G0:000687                                                               | G0:000575  | G0:0003674                                         | molecular_function                            |
| Lgelp        | Protein                                                                          | G0:000627                                                               | G0:000565  | G0:0003674                                         | molecular_function                            |
| Anslp        | Putative                                                                         | G0:000815                                                               | G0:000032  | G0:0005199                                         | structural constituent of cell wall;G0:000    |
| Apm2p        | Protein                                                                          | G0:000685                                                               | G0:003015  | G0:0030276                                         | clathrin binding;G0:0005515 protein bindin    |
| deoxyrib     | DNA phot                                                                         | G0:000071                                                               | G0:000575  | G0:0003904                                         | deoxyribodipyrimidine photo-lyase activity    |
| Signal re    | Signal re                                                                        | G0:000661                                                               | G0:000575  | G0:000502                                          | (sce03060)Protein export                      |
| Urb2p        | Protein                                                                          | G0:000636                                                               | G0:000575  | G0:0003674                                         | molecular_function                            |
| Csflp        | Protein                                                                          | G0:000611                                                               | G0:000575  | G0:0003674                                         | molecular_function                            |
| non-cano     | Non-cano                                                                         | G0:007105                                                               | G0:003145  | G0:000465                                          | (sce03018)RNA degradation                     |
| rRNA-binc    | Nucleolar                                                                        | G0:000046                                                               | G0:003202  | G0:0034511                                         | U3 snoRNA binding;G0:0030515 snoRNA bindin    |
| polo kin     | Polo-like                                                                        | G0:011008                                                               | G0:000581  | G0:001925                                          | (sce04111)Cell cycle - yeast; (sce04113)Meio  |
| pheromone    | Protein                                                                          | G0:004825                                                               | G0:003131  | G0:0003674                                         | molecular_function                            |



hypothetiPutative GO:000815GO:000557GO:0003674 molecular\_function  
 transcriTranscri GO:004585GO:000565GO:0008301 DNA binding, bending;GO:0003713 transcript  
 None None None None None None  
 None None None None None None  
 RNA-deperDEAD box GO:000635GO:003204GO:0034512 box C/D snoRNA binding;GO:0034511 U3 snoRN  
 None None None None None None  
 None None None None None None  
 hypothetiPutative GO:000815GO:000557GO:0003674 molecular\_function  
 None None None None None None  
 DNA-directRNA polyn GO:004275GO:000565GO:000105(sce03020)RNA polymerase; (sce00240)Pyrimidin  
 putative Putative GO:001657GO:000015GO:000484(sce04144)Endocytosis  
 Dgr2p Protein GO:000815GO:000557GO:0017137 Rab GTPase binding;GO:0017016 Ras GTPase b  
 cytochronCytochron GO:000615GO:000575GO:004515(sce00190)Oxidative phosphorylation; (sce011  
 vacuolar RegulatorGO:004214GO:003325GO:0005516 calmodulin binding;GO:0005515 protein bind  
 exomer coMember ofGO:003425GO:003404GO:0003674 molecular\_function  
 proteasonSubunit GO:001095GO:003451GO:006115(sce03050)Proteasome  
 Byelp Negative GO:000015GO:000565GO:0035064 methylated histone binding;GO:0140034 meth  
 chromatiSilencingGO:000135GO:000575GO:0031493 nucleosomal histone binding;GO:0031491 nuc  
 putative Glycine-tGO:007015GO:000575GO:000485(sce00970)Aminoacyl-tRNA biosynthesis  
 putative Protein iGO:007267GO:000045GO:0061711 N(6)-L-threonylcarbamoyladenine synthase a  
 Ras familGTP/GDP GO:000715GO:000015GO:0005088 Ras guanyl-nucleotide exchange factor acti  
 mitochondMitochondGO:004595GO:000575GO:0019843 rRNA binding;GO:0003735 structural constit  
 mediator Subunit GO:000015GO:007084GO:0003712 transcription coregulator activity;GO:0140  
 None None None None None None  
 Pallp Protein GO:000685GO:000595GO:0003674 molecular\_function  
 protein lGenome irGO:200015GO:000575GO:000465(sce04111)Cell cycle - yeast; (sce04113)Meio  
 RNA-proceProtein iGO:000045GO:003145GO:003055(sce03008)Ribosome biogenesis in eukaryotes  
 None None None None None None  
 U2 snRNP Putative GO:190325GO:000565GO:0030620 U2 snRNA binding;GO:0017069 snRNA binding;  
 Sna2p Protein GO:003255GO:000035GO:0031625 ubiquitin protein ligase binding;GO:004438  
 ribosomalRibosomalGO:000005GO:002265GO:000375(sce03010)Ribosome  
 SNAP receVesicle iGO:000685GO:000595GO:000545(sce04130)SNARE interactions in vesicular tra  
 flavin acMitochondGO:001585GO:000575GO:0008517 folic acid transmembrane transporter activ  
 Irc22p Protein GO:000815GO:000575GO:0003674 molecular\_function  
 ubiquitirPutative GO:001655GO:000575GO:0097027 ubiquitin-protein transferase activator ac  
 Tvp18p Integral GO:001615GO:003015GO:0003674 molecular\_function  
 mitochondAlpha sulGO:000665GO:001705GO:0004222 metalloendopeptidase activity;GO:0008237 m  
 Tarlp Dubious GO:004345GO:000575GO:0003674 molecular\_function  
 ornithineOrnithineGO:003335GO:000575GO:000455(sce)Polyamine biosynthesis, arginine => orn  
 Ego2p ComponentGO:003825GO:003445GO:0003674 molecular\_function  
 Rho familGuanine rGO:190355GO:000595GO:000555(sce04011)MAPK signaling pathway - yeast  
 exodeoxyMitochondGO:000075GO:000575GO:0035312 5'-3' exodeoxyribonuclease activity;GO:001  
 ribosomalProtein GO:000645GO:002265GO:000375(sce03010)Ribosome  
 Ure2p Nitrogen GO:004295GO:000575GO:000465(sce00480)Glutathione metabolism  
 ribosomalRibosomalGO:000215GO:002265GO:000375(sce03010)Ribosome  
 pseudouriPseudouriGO:199045GO:000575GO:0106029 tRNA pseudouridine synthase activity;GO:00  
 translatieIF3i sulGO:000215GO:004365GO:000375(sce03013)RNA transport  
 None None None None None None  
 DNA topoiDNA TopoiGO:000705GO:003145GO:000395(sce03440)Homologous recombination  
 hypothetiPutative GO:000815GO:000557GO:0003674 molecular\_function

aminophospholipid transmembrane transporter  
 TATA-binding protein subunit (GO:000111GO:19904GO:00011(sce03022)Basal transcription factors  
 None None None None None None  
 ATP-binding protein SET-domain (GO:00353GO:00058GO:0042626 ATPase activity, coupled to transmembrane  
 Loclp Nuclear protein (GO:00000GO:00306GO:00037(sce01110)Biosynthesis of secondary metabolites  
 anaphase Subunit (GO:00314GO:00056GO:00616(sce04120)Ubiquitin mediated proteolysis; (s  
 Rim9p Plasma membrane (GO:00304GO:00358GO:0003674 molecular\_function  
 Jip3p Putative (GO:00081GO:00055GO:0003674 molecular\_function  
 Eaf5p Non-essential (GO:00062GO:00352GO:0003674 molecular\_function  
 protein Cytoplasmic (GO:00436GO:00058GO:0008157 protein phosphatase 1 binding;GO:0019888 p  
 ribosome Essential (GO:01060GO:00056GO:0030674 protein binding, bridging;GO:0060090 molec  
 Rex2p 3'-5' RNA (GO:00344GO:00057GO:00001(sce03008)Ribosome biogenesis in eukaryotes  
 DNA-directed Second-late (GO:00427GO:00056GO:00010(sce03020)RNA polymerase; (sce00240)Pyrimidin  
 Rpn14p Evolutionary (GO:00706GO:00005(GO:0003674 molecular\_function  
 MutS family Protein (GO:00510GO:00007GO:0032143 single thymine insertion binding;GO:003213  
 snoRNA-binding Conserved (GO:00004GO:00343GO:00037(sce03008)Ribosome biogenesis in eukaryotes  
 putative Protein (GO:00322GO:00057GO:0008757 S-adenosylmethionine-dependent methyltrans  
 phosphatidyl Subunit (GO:00065(GO:00005(GO:00171(sce00563)Glycosylphosphatidylinositol (GPI)  
 Ras family Membrane (GO:00070GO:00057GO:0005088 Ras guanyl-nucleotide exchange factor acti  
 hypothetical Putative (GO:00081GO:00160GO:0003674 molecular\_function  
 phosphoinositide Phosphatidyl (GO:00468GO:00003GO:00044(sce00562)Inositol phosphate metabolism; (sc  
 Arf family Guanine rich (GO:00320GO:00057GO:00050(sce04144)Endocytosis  
 ribose phosphate 5-phosphoryl (GO:00060GO:00021GO:00047(M00005)PRPP biosynthesis, ribose 5P => PRPP  
 Rad34p Protein (GO:00062GO:00001GO:0003684 damaged DNA binding;GO:0003697 single-strand  
 triglyceride Peroxisomal (GO:00194GO:00057GO:0004806 triglyceride lipase activity;GO:0016298 li  
 Irc15p Microtubule (GO:00513GO:00058GO:00506(M00307)Pyruvate oxidation, pyruvate => acet  
 Cwh4lp Processive (GO:00708GO:00003GO:00045(sce)N-glycan precursor trimming; (M00073)N-  
 None None None None None None  
 Cuz1p Protein (GO:00712GO:00056GO:0070628 proteasome binding;GO:0008270 zinc ion bin  
 Pex11p Peroxisomal (GO:00443GO:00057GO:0003674 molecular\_function  
 tyrosine Phosphotyrosine (GO:00014(GO:00057GO:0004725 protein tyrosine phosphatase activity;GO:0  
 myosin 2 Type V myosin (GO:00071(GO:00715GO:0000146 microfilament motor activity;GO:0003774 mo  
 Msc6p Multicopy (GO:00071GO:00057GO:0003729 mRNA binding;GO:0003723 RNA binding;GO:000  
 Sop4p ER-membrane (GO:00068GO:00057GO:0003674 molecular\_function  
 Ecm9p Non-essential (GO:00715GO:00057GO:0003674 molecular\_function  
 Rlf2p Largest (GO:00063GO:00331GO:0042393 histone binding;GO:0005515 protein binding  
 E3 ubiquitin E3 ubiquitin (GO:00004GO:00057GO:00616(sce04120)Ubiquitin mediated proteolysis  
 flavin adenine dinucleotide Putative (GO:00158GO:00057GO:0015230 FAD transmembrane transporter activity;GO:  
 ribosomal Protein (GO:00021GO:00226GO:00037(sce03010)Ribosome  
 Duolp Essential (GO:00519GO:00427GO:0051010 microtubule plus-end binding;GO:0008017 mi  
 Prp39p U1 snRNP (GO:00003GO:00002GO:0030627 pre-mRNA 5'-splice site binding;GO:0036002  
 Smylp Kinesin-like (GO:00069(GO:00059GO:00085(sce04144)Endocytosis  
 Arf family Guanine rich (GO:00320GO:00001GO:00050(sce04144)Endocytosis  
 Snf6p Subunit (GO:00059GO:00165GO:0015616 DNA translocase activity;GO:0000182 rDNA b  
 None None None None None None  
 serine C-Component (GO:00301GO:00353GO:00047(sce00600)Sphingolipid metabolism; (sce04138  
 Rrg7p Protein (GO:00081GO:00057GO:0003674 molecular\_function  
 inositol Inositol (GO:00301GO:00313(GO:00527(sce00600)Sphingolipid metabolism; (sce01100  
 ATP-binding Mitochondrial (GO:00903GO:00057GO:0015421 oligopeptide-transporting ATPase activity;  
 snoRNA-binding Nucleolar (GO:00004GO:0034455 t-UTP (sce03008)Ribosome biogenesis in eukaryotes  
 beta-1,3- Putative (GO:00315(GO:00092GO:0005199 structural constituent of cell wall;GO:000  
 hypothetical Putative (GO:00081GO:00055GO:0003674 molecular\_function  
 Rec102p Protein (GO:00421GO:00007GO:0003674 molecular\_function

Pcl9p Cyclin; GO:000007GO:00003(GO:0016538 cyclin-dependent protein serine/threonine  
 sulfiredoxin;GO:00988(GO:00056GO:0032542 sulfiredoxin activity;GO:0016667 oxidoredu  
 Vrp1p Verprolin;GO:20006(GO:00304GO:00510(sce04144)Endocytosis  
 Art10p Protein GO:00068GO:00057GO:0003674 molecular\_function  
 Acl4p Specific GO:00304GO:00056GO:0003674 molecular\_function  
 Ctk2p Beta subunit;GO:00459(GO:00706GO:0061575 cyclin-dependent protein serine/threonine  
 Ca(2+)-binding;GO:00158(GO:00057GO:0005471 ATP:ADP antiporter activity;GO:0015217 ADP  
 bifunctional;GO:00065GO:00057GO:00039(M00028)Ornithine biosynthesis, glutamate =>  
 v-SNARE;Protein GO:00482GO:00125(GO:00054(sce04130)SNARE interactions in vesicular tra  
 NAD-dependent;GO:19904GO:00007GO:00171(sce00760)Nicotinate and nicotinamide metabo  
 hypotheticalProtein GO:00197(GO:00058GO:0043022 ribosome binding;GO:0043021 ribonucleoprot  
 Bit61p Subunit GO:00382(GO:00319GO:0003674 molecular\_function  
 dynamin-1;Dynamin-1;GO:00033GO:00057GO:00039(sce04139)Mitophagy - yeast  
 tRNA dihydriDihydrou;GO:00029GO:00055GO:0102266 tRNA-dihydrouridine20a synthase activity;G  
 None None None None None None  
 Bsc5p Protein GO:00065GO:00001GO:0034450 ubiquitin-ubiquitin ligase activity;GO:006  
 None None None None None None  
 Rtc1p Subunit GO:19042GO:00970GO:0043022 ribosome binding;GO:0043021 ribonucleoprot  
 hypotheticalPutative GO:00081GO:00055GO:0003674 molecular\_function  
 hypotheticalPutative GO:00081GO:00055GO:0003674 molecular\_function  
 sterol hCortical GO:00970GO:00325GO:0003674 molecular\_function  
 RNA-binding;Signal reGO:00066GO:00057GO:00309(sce03060)Protein export  
 Nup85p Subunit GO:00000GO:00310GO:00170(sce03013)RNA transport  
 mismatch Protein GO:00431GO:00323(GO:00004(sce03430)Mismatch repair  
 Dialp Protein GO:00014(GO:00057GO:0003674 molecular\_function  
 Billp Protein GO:00510GO:00059GO:0003674 molecular\_function  
 Om45p Mitochondrion;GO:00081GO:00313(GO:0003674 molecular\_function  
 None None None None None None  
 Sialp Protein GO:19026(GO:00055GO:0004721 phosphoprotein phosphatase activity;GO:001  
 Pes4p Poly(A) GO:00081GO:00104GO:0008143 poly(A) binding;GO:0008266 poly(U) RNA bin  
 dolichyl-Glucosyl GO:00064GO:00057GO:00422(sce)N-glycan precursor biosynthesis; (M0005  
 Hym1p ComponentGO:00071GO:00433GO:0004674 protein serine/threonine kinase activity;G  
 sphinganiLong-chain;GO:00301GO:00057GO:00423(sce00600)Sphingolipid metabolism  
 None None None None None None  
 Mdm31p Mitochondrion;GO:19002(GO:00057GO:0003674 molecular\_function  
 Dad2p EssentialGO:00519GO:00427GO:0051010 microtubule plus-end binding;GO:0008017 mi  
 hypotheticalPutative protein of unknown function; green fluorescent protein (GFP)-fusion pro  
 Tos1p CovalentGO:00081GO:00092GO:0003674 molecular\_function  
 Apm3p Mu3-like GO:00066GO:00301GO:0003674 molecular\_function  
 Irc13p Dubious GO:00081GO:00160GO:0003674 molecular\_function  
 Atslp Protein GO:00071GO:00057GO:0003674 molecular\_function  
 putative Putative GO:00516(GO:00427GO:0003724 RNA helicase activity;GO:0004386 helicase  
 Gis3p Protein GO:00355GO:00056GO:0003674 molecular\_function  
 phosphatidylPhosphatidylGO:00163GO:00304GO:0008195 phosphatidate phosphatase activity;GO:0016  
 ribonucleosideRibonucleosideGO:19051GO:00056GO:1990846 ribonucleoside-diphosphate reductase inhib  
 glycolipidMembrane GO:00342(GO:00057GO:0034202 glycolipid-translocating activity;GO:00053  
 Laalp AP-1 accGO:00421GO:00301GO:0043022 ribosome binding;GO:0043021 ribonucleoprot  
 None None None None None None  
 putative Protein GO:00071GO:00433GO:0004674 protein serine/threonine kinase activity;G  
 None None None None None None  
 hypotheticalPutative GO:00081GO:00055GO:0003674 molecular\_function  
 None None None None None None  
 None None None None None None  
 None None None None None None

|           |           |          |            |              |                                               |
|-----------|-----------|----------|------------|--------------|-----------------------------------------------|
| hypotheti | Putative  | G0:00072 | G0:00055   | G0:0005085   | guanyl-nucleotide exchange factor activity    |
| None      | None      | None     | None       | None         | None                                          |
| None      | None      | None     | None       | None         | None                                          |
| None      | None      | None     | None       | None         | None                                          |
| None      | None      | None     | None       | None         | None                                          |
| None      | None      | None     | None       | None         | None                                          |
| oligo-1,  | (Alpha-gl | G0:00000 | G0:00057   | G0:00045     | (sce00052)Galactose metabolism; (sce00500)St  |
| Atgl6p    | Conserve  | G0:00448 | (G0:01200  | G0:00197     | (sce04138)Autophagy - yeast                   |
| None      | None      | None     | None       | None         | None                                          |
| None      | None      | None     | None       | None         | None                                          |
| methylthi | 5'-methyl | G0:00195 | (G0:00057  | G0:00465     | (sce)Methionine salvage pathway; (M00034)Metl |
| dolichyl- | Dolichol  | G0:00193 | G0:00057   | G0:00045     | (sce00510)N-Glycan biosynthesis; (sce01100)M  |
| DNA helic | DNA helic | G0:19909 | G0:00056   | G0:00431     | (sce03430)Mismatch repair; (sce03420)Nucleot  |
| hypotheti | Putative  | G0:00081 | G0:00160   | G0:0003674   | molecular_function                            |
| cyclin-d  | Cyclin-d  | G0:00606 | G0:00709   | G0:00199     | (sce04111)Cell cycle - yeast                  |
| ubiquitir | Ubiquitir | G0:00021 | G0:00058   | G0:00313     | (sce04122)Sulfur relay system                 |
| Irc19p    | Protein   | G0:00304 | G0:00055   | G0:0003674   | molecular_function                            |
| Opy2p     | Integral  | G0:00007 | G0:00003   | G0:00036     | (sce04011)MAPK signaling pathway - yeast      |
| Gosl1p    | v-SNARE   | G0:00482 | (G0:00057  | G0:00054     | (sce04130)SNARE interactions in vesicular tr  |
| None      | None      | None     | None       | None         | None                                          |
| DNA-direc | RNA polyn | G0:00427 | G0:00056   | G0:00039     | (sce03020)RNA polymerase; (sce00240)Pyrimidi  |
| hypotheti | Putative  | G0:00081 | G0:00055   | G0:0003674   | molecular_function                            |
| Yrmlp     | Zinc fin  | G0:00063 | G0:00056   | G0:0000981   | DNA-binding transcription factor activity,    |
| ribosomal | Ribosomal | G0:00180 | G0:00056   | G0:0016279   | protein-lysine N-methyltransferase activit    |
| Scs3p     | Protein   | G0:00343 | G0:00301   | G0:0003674   | molecular_function                            |
| None      | None      | None     | None       | None         | None                                          |
| Voalp     | ER protei | G0:00346 | G0:00003   | G0:0003674   | molecular_function                            |
| Vps63p    | Putative  | G0:00066 | G0:00056   | G0:0003674   | molecular_function                            |
| Pho86p    | Endoplas  | G0:00109 | G0:00057   | G0:0051082   | unfolded protein binding;G0:0005515 protei    |
| ribosomal | Protein   | G0:00064 | (G0:00226  | G0:00037     | (sce03010)Ribosome                            |
| None      | None      | None     | None       | None         | None                                          |
| Dan4p     | Cell wall | G0:00315 | (G0:00092  | G0:0005199   | structural constituent of cell wall;G0:000    |
| ATP-deper | ATP-deper | G0:00704 | G0:00058   | G0:00040     | (sce03015)mRNA surveillance pathway; (sce030  |
| None      | None      | None     | None       | None         | None                                          |
| Kegl1p    | Integral  | G0:00060 | G0:00301   | G0:0003674   | molecular_function                            |
| MCM DNA   | Component | G0:00319 | G0:00711   | (G0:00171    | (sce03030)DNA replication; (sce04111)Cell cy  |
| Sum1p     | Transcri  | G0:00322 | G0:00056   | G0:00036     | (sce04113)Meiosis - yeast                     |
| Rrn5p     | Protein   | G0:00427 | G0:00005   | (G0:0001181  | RNA polymerase I general transcription ini    |
| None      | None      | None     | None       | None         | None                                          |
| Nup120p   | Subunit   | G0:00353 | G0:00310   | G0:00170     | (sce03013)RNA transport                       |
| Sxm1p     | Nuclear   | G0:00064 | (G0:00056  | G0:0008536   | Ran GTPase binding;G0:0008565 protein tran    |
| signal s  | Putative  | G0:00068 | G0:00003   | G0:0005048   | signal sequence binding;G0:0042277 peptide    |
| protein   | Essential | G0:00301 | G0:00057   | G0:0015450   | P-P-bond-hydrolysis-driven protein transme    |
| snoRNA-bi | Nucleolar | G0:00004 | G0:0030692 | Noc4p-Nop14p | complex;G0:0030689 Noc complex;G0:0030        |
| Aft2p     | Iron-regi | G0:00360 | G0:00057   | G0:0000978   | RNA polymerase II proximal promoter sequen    |
| DNA-direc | RNA polyn | G0:00427 | G0:00057   | G0:00010     | (sce03020)RNA polymerase; (sce00240)Pyrimidi  |
| Spollp    | Meiosis-  | G0:00007 | (G0:00056  | G0:00039     | (sce04113)Meiosis - yeast                     |
| Kar9p     | Spindle   | G0:00315 | G0:00007   | G0:0003674   | molecular_function                            |
| U6 snRNA  | Lsm (Like | G0:00003 | G0:00056   | G0:00170     | (sce03018)RNA degradation; (sce03040)Spliceo  |
| dihydroxy | Dihydroxy | G0:00195 | G0:00058   | G0:00503     | (sce00051)Fructose and mannose metabolism; (  |
| Bud25p    | Protein   | G0:00002 | G0:00055   | G0:0003674   | molecular_function                            |
| hypotheti | Protein   | G0:00711 | (G0:00057  | G0:0016807   | cysteine-type carboxypeptidase activity;G0    |
| putative  | Putative  | G0:00551 | G0:00160   | G0:0016491   | oxidoreductase activity;G0:0003824 catalyt    |
| Pbplp     | Component | G0:19003 | G0:00104   | G0:0003729   | mRNA binding;G0:0003723 RNA binding;G0:000    |

Htl1p Component GO:000635 GO:001658 GO:0015616 DNA translocase activity; GO:0008094 DNA-de  
 Cep3p Essential GO:000705 GO:003151 GO:0019237 centromeric DNA binding; GO:0008301 DNA bin  
 ribosomal Ribosomal GO:000218 GO:002262 GO:000375 (sce03010) Ribosome  
 None None None None None None  
 B-type cyB-type cy GO:001065 GO:000033 GO:001658 (sce04111) Cell cycle - yeast; (sce04113) Meio  
 Rlm1p MADS-box GO:003606 GO:000565 GO:000833 (sce04011) MAPK signaling pathway - yeast  
 methionir Mitochond GO:000645 GO:000575 GO:000482 (sce00450) Selenocompound metabolism; (sce009  
 DExD/H-bc Cytoplasm GO:004596 GO:001045 GO:000406 (sce03018) RNA degradation  
 None None None None None None  
 transcrip RNA pol I GO:004275 GO:000012 GO:0001002 RNA polymerase III type 1 promoter sequenc  
 None None None None None None  
 Ino2p Transcrip GO:000865 GO:009057 GO:0000978 RNA polymerase II proximal promoter sequen  
 Hsm3p Evolutio GO:007065 GO:000854 GO:0003674 molecular\_function  
 mitochondr Mitochond GO:003254 GO:000576 GO:0003735 structural constituent of ribosome; GO:0005  
 tRNA spli Subunit c GO:000037 GO:000021 GO:0000213 tRNA-intron endonuclease activity; GO:00168  
 putative Putative GO:001604 GO:000575 GO:0047372 acylglycerol lipase activity; GO:0016298 li  
 Swp82p Member of GO:004594 GO:001658 GO:0015616 DNA translocase activity; GO:0008094 DNA-de  
 None None None None None None  
 hypotheti Putative GO:000815 GO:001602 GO:0003674 molecular\_function  
 Ady3p Protein r GO:003212 GO:007005 GO:0003674 molecular\_function  
 acetate-- Acetyl-co GO:001965 GO:000575 GO:000398 (sce00640) Propanoate metabolism; (sce00680) M  
 putative Meiosis-s GO:007058 GO:000562 GO:0004623 phospholipase A2 activity; GO:0004620 phosp  
 Aim24p Protein v GO:000706 GO:003133 GO:0003674 molecular\_function  
 None None None None None None  
 putative Acyltrans GO:003614 GO:000581 GO:0016746 transferase activity, transferring acyl gr  
 transcrip TFIIE sm GO:000635 GO:000567 GO:000109 (sce03022) Basal transcription factors  
 None None None None None None  
 Utp7p Nucleolar GO:000047 GO:003068 GO:0003674 molecular\_function  
 hypotheti Putative protein of unknown function; SWAT-GFP and mCherry fusion proteins local  
 DNA-bind Component GO:190047 GO:003369 GO:0001227 DNA-binding transcription repressor activi  
 actin-bir Actin as GO:200066 GO:003047 GO:005101 (sce04144) Endocytosis  
 RSC chrom ATPase cc GO:006155 GO:001658 GO:0015616 DNA translocase activity; GO:0070577 lysine  
 putative Putative GO:003045 GO:000015 GO:000457 (sce) N-glycan precursor trimming; (M00073) N-  
 putative Mitochond GO:003204 GO:003131 GO:0004605 phosphatidate cytidyltransferase activit  
 holocyto Cytochrom GO:001806 GO:000575 GO:000446 (sce00860) Porphyrin and chlorophyll metaboli  
 mismatch Protein r GO:000071 GO:003239 GO:000046 (sce03430) Mismatch repair  
 protein t Essential GO:003015 GO:000574 GO:0030943 mitochondrion targeting sequence binding; G  
 sphingosi Ceramide GO:004651 GO:006157 GO:005029 (sce00600) Sphingolipid metabolism; (sce01100  
 phosphori N-succiny GO:000615 GO:000565 GO:000465 (M00048) Inosine monophosphate biosynthesis, l  
 ferric/c Ferric re GO:001567 GO:000588 GO:0052851 ferric-chelate reductase (NADPH) activity;  
 type 2C r Type 2C r GO:005138 GO:000582 GO:199045 (sce04011) MAPK signaling pathway - yeast  
 Dse3p Daughter GO:000704 GO:000595 GO:0003674 molecular\_function  
 phosphat Protein r GO:190515 GO:000095 GO:0004865 protein serine/threonine phosphatase inhib  
 flavin-li Flavin-li GO:005511 GO:000032 GO:0016971 flavin-linked sulfhydryl oxidase activity;  
 hypotheti Protein c GO:000815 GO:000032 GO:0003674 molecular\_function  
 Erv25p Member of GO:000705 GO:003015 GO:0003674 molecular\_function  
 Erdlp Predicted GO:000662 GO:000575 GO:0003674 molecular\_function  
 hypotheti Putative GO:000815 GO:000557 GO:0003674 molecular\_function  
 Avt2p Putative GO:000335 GO:000577 GO:0015171 amino acid transmembrane transporter activ  
 Bsd2p Heavy met GO:000662 GO:000032 GO:0005515 protein binding; GO:0005488 binding; GO:0003  
 H(+)-trar Subunit ( GO:000705 GO:000022 GO:000855 (sce04145) Phagosome; (sce00190) Oxidative pho  
 peptidyl Membrane- GO:000041 GO:000032 GO:0005528 FK506 binding; GO:0005527 macrolide binding  
 None None None None None None  
 Arf famil Guanine r GO:001051 GO:000595 GO:0005086 ARF guanyl-nucleotide exchange factor acti

phosphatase Protein tGO:19001fGO:00056fGO:0004864 protein phosphatase inhibitor activity;GO:0005616 tRNA adapter ATP (CTP)GO:00016fGO:00057fGO:00529f(sce03013)RNA transport

Thp3p Protein tGO:00003fGO:00353fGO:0003674 molecular\_function

purine-cyPutative GO:00158fGO:00003fGO:0015205 nucleobase transmembrane transporter activity

ESCRT-I sComponentGO:19046fGO:00008fGO:00448f(sce04144)Endocytosis

aminoacylOne of tvGO:00325fGO:00057fGO:0004045 aminoacyl-tRNA hydrolase activity;GO:01401f

Atpllp MolecularGO:00336fGO:00057fGO:0051082 unfolded protein binding;GO:0005515 protein binding

ribosomalRibosomalGO:00004fGO:00306fGO:00037f(sce03010)Ribosome

dolichyl-Protein (GO:00717fGO:00975fGO:00041f(sce00515)Mannose type O-glycan biosynthesis

Rec107p Protein iGO:00071fGO:00007fGO:0003674 molecular\_function

Sfhlp ComponentGO:00332fGO:00165fGO:0015616 DNA translocase activity;GO:0008094 DNA-dependent

None None None None None None

Cox23p Protein tGO:00331fGO:00057fGO:0003674 molecular\_function

type I sType I tGO:00066fGO:00319fGO:0005048 signal sequence binding;GO:0042277 peptide binding

hypotheticalPutative GO:00081fGO:00057fGO:0005525 GTP binding;GO:0032550 purine ribonucleoside binding

Dam1p EssentialGO:19907fGO:19905fGO:00510f(sce04111)Cell cycle - yeast

None None None None None None

hypotheticalPutative GO:00193fGO:00301fGO:00302f(sce00563)Glycosylphosphatidylinositol (GPI) anchor

hypotheticalPutative GO:00081fGO:00719fGO:0003674 molecular\_function

Sna4p Protein cGO:00081fGO:00003fGO:0003674 molecular\_function

None None None None None None

tubulin-lSubunit cGO:00716fGO:00162fGO:0051082 unfolded protein binding;GO:0015631 tubulin binding

putative Cell wallGO:00009fGO:00092fGO:0015926 glucosidase activity;GO:0004553 hydrolase activity

Wiplp KinetochGO:00070fGO:00007fGO:0019237 centromeric DNA binding;GO:1990837 sequence-specific DNA binding

Nmd5p KaryophenGO:00066fGO:00343fGO:0008536 Ran GTPase binding;GO:0008565 protein transport

putative Putative GO:00081fGO:00056fGO:0052689 carboxylic ester hydrolase activity;GO:0016742

Cdhlp ActivatorGO:19024fGO:00056fGO:19907f(sce04120)Ubiquitin mediated proteolysis; (sce04120)

hypotheticalPutative GO:00081fGO:00160fGO:0003674 molecular\_function

hypotheticalPutative GO:00081fGO:00055fGO:0003674 molecular\_function

multidrugMultidrugGO:00304fGO:00058fGO:0015238 drug transmembrane transporter activity;GO:0005524

hypotheticalDubious cGO:00081fGO:00160fGO:0003674 molecular\_function

Arf familyGuanine rGO:00320fGO:00001fGO:0005086 ARF guanyl-nucleotide exchange factor activity

4a-hydroxPutative 4a-hydroxytetrahydrobiopterin dehydratase; green fluorescent protein (GFP)

karyophenKaryophenGO:00715fGO:00425fGO:00050f(sce03013)RNA transport

Herlp Protein cGO:00070fGO:00058fGO:0043022 ribosome binding;GO:0043021 ribonucleoprotein complex

None None None None None None

chromatinSubunit (GO:00439fGO:00466fGO:00044f(sce03022)Basal transcription factors

None None None None None None

None None None None None None

sphingosinCeramide GO:00465fGO:00615fGO:00502f(sce00600)Sphingolipid metabolism; (sce01100)Sphingolipid

ribosome NucleolarGO:00004fGO:00306fGO:0003723 RNA binding;GO:0003676 nucleic acid binding

Pds5p Cohesion GO:00071fGO:00349fGO:0005198 structural molecule activity;GO:0003674 molecular\_function

inositolInositolGO:00066fGO:00709fGO:0045140 inositol phosphoceramide synthase activity

ElongatorSubunit cGO:00324fGO:00335fGO:0000049 tRNA binding;GO:0016887 ATPase activity;GO:0005524

Bit2p Subunit cGO:00382fGO:00319fGO:0003674 molecular\_function

phosphoglycerate-3-phosphateGO:00065fGO:00057fGO:00617f(M00020)Serine biosynthesis, glycerate-3P => glycerate-3P

Ecolp AcetyltransferaseGO:00340fGO:00435fGO:0016407 acetyltransferase activity;GO:0016747 transmembrane transporter activity

ribonucleosideSubunit cGO:00349fGO:00056fGO:00045f(sce03008)Ribosome biogenesis in eukaryotes; (sce03008)

short-chainPutative GO:00551fGO:00160fGO:0016491 oxidoreductase activity;GO:0003824 catalytic activity

Zip2p Meiosis-sGO:00071fGO:00007fGO:0003677 DNA binding;GO:0000166 nucleotide binding;GO:0003674

Cislp Protein cGO:00081fGO:00057fGO:0003674 molecular\_function

Yme2p Integral GO:00000fGO:00313fGO:0003723 RNA binding;GO:0003676 nucleic acid binding

glutamateMitochondrialGO:00065fGO:00057fGO:00043f(M00028)Ornithine biosynthesis, glutamate => ornithine

hypotheticalPutative GO:19023fGO:00057fGO:0008271 secondary active sulfate transmembrane transporter activity

seripaupεProtein cGO:00315(GO:000927GO:0005199 structural constituent of cell wall;GO:000 lysophosϕPhospholigGO:00361fGO:00425fGO:00046f (sce00564)Glycerophospholipid metabolism  
3-deoxy-73-deoxy-IGO:00094fGO:00056fGO:00038f (M00022)Shikimate pathway, phosphoenolpyruva  
nucleocyEssentialGO:00353fGO:004461GO:0008139 nuclear localization sequence binding;GO:0  
hypothetiUbiB fami (Human)Gc (Human)Gc (Human)GO:0004674 protein serine/threonine kinase act  
Fmp10p Putative GO:00081fGO:00319fGO:0003674 molecular\_function  
GTPase-acGTPase-acGO:00034(GO:00301fGO:00050f (sce04141)Protein processing in endoplasmic :  
protein-εSPOUT metGO:00352fGO:00057fGO:0035241 protein-arginine omega-N monomethyltransfe  
NADP-depεNADPH-defGO:00060fGO:00055fGO:00081f (sce00040)Pentose and glucuronate interconve  
Rxt3p ComponentGO:00164fGO:00336fGO:0003674 molecular\_function  
ubiquitirUbiquitirGO:00009fGO:00056fGO:0004842 ubiquitin-protein transferase activity;GO:0  
hypothetiPutative GO:00071fGO:00160fGO:0005525 GTP binding;GO:0032550 purine ribonucleosi  
Cue3p Protein cGO:00081fGO:00057fGO:0043130 ubiquitin binding;GO:0032182 ubiquitin-lik  
Djplp CytosolicGO:00450fGO:00059fGO:0051087 chaperone binding;GO:0005515 protein bindi  
ribosomalProtein cGO:00422fGO:00226fGO:00037f (sce03010)Ribosome  
putative TransferGO:00433fGO:00160fGO:0008237 metalloproteinase activity;GO:0070011 pepti  
hypothetiPutative GO:00081fGO:00055fGO:0003674 molecular\_function  
Std1p Protein iGO:00715fGO:00058fGO:0030295 protein kinase activator activity;GO:00192  
Rrt1p Protein cGO:00081fGO:00160fGO:0003674 molecular\_function  
translocConserveGO:00312(GO:00057fGO:00154f (sce03060)Protein export; (sce04145)Phagosome  
hypothetiPutative GO:00517fGO:00056fGO:0003674 molecular\_function  
Rtt105p Protein vGO:00105fGO:00056fGO:0003674 molecular\_function  
glucan 1, SporulatiGO:00304fGO:000561GO:00043f (sce00500)Starch and sucrose metabolism  
ubiquitirER membrGO:00309fGO:00008fGO:00048f (sce04141)Protein processing in endoplasmic :  
dolichyl-Protein (GO:007171GO:00975fGO:00041f (sce00515)Mannose type O-glycan biosynthesis  
hypothetiCPA1 uORfGO:000641GO:00058fGO:0045182 translation regulator activity;GO:0003674 :  
Emc2p Member oGO:00349fGO:00725fGO:0003674 molecular\_function  
Dtrlp Putative GO:00304fGO:00056fGO:0005275 amine transmembrane transporter activity;G  
Dlslp Subunit cGO:00708fGO:00086fGO:00469f (sce03410)Base excision repair; (sce03030)DN  
pyruvate Pyruvate GO:00060fGO:00058fGO:00047f (sce00020)Citrate cycle (TCA cycle); (sce006  
Aim19p Protein cGO:00081fGO:00319fGO:0003674 molecular\_function  
hypothetiPutative GO:00550fGO:00160fGO:0003674 molecular\_function  
Bfalp Subunit cGO:00315fGO:19903fGO:00050f (sce04111)Cell cycle - yeast  
tRNA (urεtRNA(Ser)GO:00304fGO:00057fGO:0016300 tRNA (uracil) methyltransferase activity;G  
ESCRT-II ComponentGO:00004fGO:000081GO:00428f (sce04144)Endocytosis  
None None None None None None  
None None None None None None  
importin-Nuclear εGO:00066(GO:00056fGO:0005049 nuclear export signal receptor activity;GO  
E2 SUMO-cSUMO-conGO:00000fGO:00007fGO:00616f (sce04120)Ubiquitin mediated proteolysis; (s  
DNA-bindirPd3L hisGO:19005fGO:00336fGO:00704f (sce04139)Mitophagy - yeast; (sce04138)Autop  
actin-relActin-relGO:00315fGO:00002fGO:0003774 motor activity;GO:0017111 nucleoside-triph  
kinetochComponentGO:005131GO:0031262 Ndc80 complex;GO:0000778 condensed nuclear chromoso  
ADP-ribosADP-ribosGO:00482(GO:00301fGO:00050f (sce04144)Endocytosis  
Ran GTPasRan GTPasGO:00319fGO:00058fGO:00039f (sce03008)Ribosome biogenesis in eukaryotes;  
None None None None None None  
hypothetiPredicted membrane protein; SWAT-GFP and mCherry fusion proteins localize to the  
None None None None None None  
Mgr1p Subunit cGO:000651GO:00319fGO:0051787 misfolded protein binding;GO:0005515 prote  
serine/thProtein lGO:01000(GO:00226fGO:00046f (sce04138)Autophagy - yeast; (sce04141)Prote  
Syolp TransportGO:00066(GO:00056fGO:0051082 unfolded protein binding;GO:0005515 protei  
chromatirEvolutorGO:00070fGO:009051GO:00045f (sce03018)RNA degradation; (sce03008)Ribosom  
IMP 5' -mInosine fGO:00061fGO:00055fGO:00504f (sce00760)Nicotinate and nicotinamide metabo  
galactoseGalactoseGO:00157fGO:00058fGO:00053f (sce04113)Meiosis - yeast  
Pet54p MitochondGO:000037GO:003131GO:0097157 pre-mRNA intronic binding;GO:0048027 mRNA

hypothetiPutative protein of unknown function; green fluorescent protein (GFP)-fusion pro  
 None None None None None None  
 None None None None None None  
 None None None None None None  
 bifunctiLysosphG0:00905G0:00056G0:0052642 lysophosphatidic acid phosphatase activity  
 serine/thlProtein G0:01201G0:00304G0:0004674 protein serine/threonine kinase activity;G  
 ribosomalRibosomalG0:00021G0:00226G0:00037 (sce03010)Ribosome  
 Vid27p CytoplasmG0:00081G0:00057G0:0003674 molecular\_function  
 None None None None None None  
 type 2A-1Ceramide-G0:00020G0:00001G0:0004722 protein serine/threonine phosphatase activ  
 gamma-glGamma-glG0:00193G0:00003G0:01029 (sce00430)Taurine and hypotaurine metabolism  
 Oca4p CytoplasmG0:00353G0:00057G0:0004725 protein tyrosine phosphatase activity;G0:0  
 hypothetiPutative G0:00081G0:00160G0:0003674 molecular\_function  
 putative Member ofG0:19015G0:00057G0:0019239 deaminase activity;G0:0016787 hydrolase ac  
 None None None None None None  
 Chm7p Yeast homG0:00070G0:00055G0:000367 (sce04144)Endocytosis  
 glucose-6(Glucose-6G0:00450G0:00057G0:00043 (M00006)Pentose phosphate pathway, oxidative  
 aldose 1-Putative G0:00334G0:00055G0:0004034 aldose 1-epimerase activity;G0:0016857 rac  
 Jip5p Protein G0:00422G0:00057G0:0003674 molecular\_function  
 DNA-directRNA polynG0:00011G0:00056G0:00039 (sce03020)RNA polymerase; (sce00240)Pyrimidi  
 succinateSuccinateG0:00065G0:00057G0:00090 (sce)GABA (gamma-Aminobutyrate) shunt; (M000  
 Leolp ComponentG0:20011G0:00165G0:1990269 RNA polymerase II C-terminal domain phosph  
 L-itol Sorbitol G0:00193G0:00055G0:00039 (sce00040)Pentose and glucuronate interconve  
 Sgelp Plasma meG0:00068G0:00058G0:0015238 drug transmembrane transporter activity;G0  
 Xdjlp ChaperoneG0:00301G0:00313(G0:0001671 ATPase activator activity;G0:0060590 ATPas  
 protein cMember ofG0:00454G0:00057G0:0003756 protein disulfide isomerase activity;G0:00  
 Sgdlp EssentialG0:00069G0:00970G0:0003723 RNA binding;G0:0003676 nucleic acid bindin  
 Izh3p Membrane G0:00068G0:00057G0:0038023 signaling receptor activity;G0:0060089 mol  
 Swc3p Protein cG0:00434G0:00008G0:0003674 molecular\_function  
 putative Protein cG0:00086G0:19036(G0:00363 (sce00750)Vitamin B6 metabolism  
 Tmslp Vacuolar G0:00081G0:00003G0:0003674 molecular\_function  
 Smc5-Smc6Subunit cG0:00169G0:00309G0:0019789 SUMO transferase activity;G0:0019787 ubiqu  
 serine/thSR proteiG0:00423(G0:00056G0:0004674 protein serine/threonine kinase activity;G  
 putative Putative G0:00021G0:00057G0:0043022 ribosome binding;G0:0043021 ribonucleoprot  
 Golgi trEssentialG0:00003(G0:00171G0:0008565 protein transporter activity;G0:0005215 tr  
 hypothetiPutative protein of unknown function  
 ribosomalProtein cG0:00000G0:00226G0:00701 (sce03010)Ribosome  
 Pselp KaryopherG0:00601G0:00343G0:0008139 nuclear localization sequence binding;G0:0  
 dihydroliDihydroliG0:00065G0:00093G0:00043 (M00307)Pyruvate oxidation, pyruvate => acet  
 None None None None None None  
 TRAMP conZinc knucG0:00710G0:00314G0:00046 (sce03018)RNA degradation  
 Atg22p Vacuolar G0:00329G0:00716G0:000367 (sce04138)Autophagy - yeast  
 chromatiComponentG0:00073G0:00004(G0:0031490 chromatin DNA binding;G0:0003682 chromatin  
 None None None None None None  
 ribosomalRibosomalG0:00000G0:00226G0:00037 (sce03010)Ribosome  
 Sld3p Protein iG0:00062G0:00312G0:0003682 chromatin binding;G0:0005488 binding;G0:00  
 hypothetiPutative G0:00081G0:00057G0:0003674 molecular\_function  
 Ubx4p UBX domaiG0:00304G0:00198G0:0044877 protein-containing complex binding;G0:0005  
 Mhrlp MitochonG0:00902G0:00057G0:0000150 recombinase activity;G0:0003697 single-str  
 anaphase Subunit cG0:00458G0:00056G0:00616 (sce04120)Ubiquitin mediated proteolysis; (s  
 Psp2p Asn rich G0:00081G0:00009G0:0003729 mRNA binding;G0:0003723 RNA binding;G0:000  
 DNA polynCatalyticG0:00333G0:00086G0:00083 (sce03410)Base excision repair; (sce03030)DN  
 hypothetiPutative G0:00081G0:00057G0:0003674 molecular\_function  
 Arp6p Actin-reiG0:00434G0:00008G0:0031491 nucleosome binding;G0:0003682 chromatin bi



ubiquitin Ubiquitin GO:000075 GO:000562 GO:0031386 protein tag; GO:0003674 molecular\_function  
 alkaline Alkaline GO:004651 GO:000032 GO:007071 (sce00600) Sphingolipid metabolism  
 Tre1p Transferin GO:004332 GO:000032 GO:0003674 molecular\_function  
 long-chain Very long GO:004452 GO:003122 GO:0031957 very long-chain fatty acid-CoA ligase activity  
 Aps2p Small subunit GO:000688 GO:003012 GO:000856 (sce04144) Endocytosis  
 ribosomal Protein GO:000641 GO:002262 GO:001984 (sce03010) Ribosome  
 bile acid Transport GO:001572 GO:000032 GO:0015432 bile acid-exporting ATPase activity; GO:003  
 cohesin-1 Subunit GO:19054 GO:000572 GO:004351 (sce04111) Cell cycle - yeast  
 translation Mitochondrion GO:007012 GO:000572 GO:0003743 translation initiation factor activity; GO:0  
 Otu2p Protein GO:001657 GO:000584 GO:0004843 thiol-dependent ubiquitin-specific protease  
 Snf12p 73 kDa subunit GO:006141 GO:001651 GO:0015616 DNA translocase activity; GO:0008094 DNA-de  
 hypothetized Putative GO:000812 GO:000557 GO:0003674 molecular\_function  
 Ddc1p DNA damage GO:005152 GO:003089 GO:000840 (sce04111) Cell cycle - yeast; (sce04113) Meiosis  
 ferroxidase Mitochondrion GO:001828 GO:000572 GO:003498 (sce00860) Porphyrin and chlorophyll metabolism  
 protein-1 Ribosomal GO:001802 GO:000582 GO:0016279 protein-lysine N-methyltransferase activity  
 Hit1p Protein GO:000045 GO:007076 GO:0046872 metal ion binding; GO:0043169 cation binding  
 hypothetized Putative GO:000812 GO:000572 GO:0003674 molecular\_function  
 Mtm1p Mitochondrion GO:003192 GO:000572 GO:0030170 pyridoxal phosphate binding; GO:0070279 vit  
 B-type cytochrome B-type cytochrome GO:001066 GO:000032 GO:001652 (sce04011) MAPK signaling pathway - yeast; (s  
 hypothetized Putative protein of unknown function; green fluorescent protein (GFP)-fusion protein  
 hypothetized Putative GO:000651 GO:000012 GO:0034450 ubiquitin-ubiquitin ligase activity; GO:006  
 chitin deacetylase Chitin deacetylase GO:003047 GO:000562 GO:000409 (sce00520) Amino sugar and nucleotide sugar me  
 Msb1p Protein GO:003001 GO:000592 GO:0003674 molecular\_function  
 putative Peroxisome GO:000152 GO:000572 GO:003097 (sce04146) Peroxisome  
 Pxp2p Peroxisome GO:009888 GO:000572 GO:0051920 peroxiredoxin activity; GO:0016684 oxidoreductase  
 Zap1p Zinc-regulated GO:009722 GO:000562 GO:0000977 RNA polymerase II regulatory region sequence  
 ATP-binding Mitochondrion GO:004822 GO:000572 GO:004262 (sce02010) ABC transporters  
 ribosome Constituent GO:004227 GO:003068 GO:0003674 molecular\_function  
 hypothetized Putative GO:000812 GO:001602 GO:0003674 molecular\_function  
 GTPase R1 Cytoplasm GO:004222 GO:19909 GO:004302 (sce03008) Ribosome biogenesis in eukaryotes  
 None None None None None None  
 DNA-directed RNA polymerase RNA polymerase GO:004272 GO:000572 GO:000102 (sce03020) RNA polymerase; (sce00240) Pyrimidine  
 hypothetized Putative GO:000812 GO:000557 GO:0003674 molecular\_function  
 azole transporter Plasma membrane GO:004511 GO:000588 GO:1901474 azole transmembrane transporter activity; GO:0005  
 ERME1 Conduit Mitochondrion GO:004504 GO:003286 GO:190161 (sce04139) Mitophagy - yeast  
 ribosomal Ribosomal GO:000042 GO:003068 GO:000372 (sce03010) Ribosome  
 glutathione reductase Cis-golgi GO:009888 GO:000572 GO:0004362 glutathione-disulfide reductase activity; GO:0  
 4-amino-3-hydroxybutyrate Protein GO:000922 GO:000557 GO:000367 (sce00730) Thiamine metabolism; (sce01100) Metabolism  
 Ugo1p Outer membrane GO:000802 GO:003131 GO:0022857 transmembrane transporter activity; GO:0005  
 Mnl1p Protein GO:000037 GO:000572 GO:0003674 molecular\_function  
 None None None None None None  
 polynucleotide DNA 3'-phosphatase GO:009852 GO:000562 GO:0046404 ATP-dependent polydeoxyribonucleotide 5'-h  
 E3 ubiquitin Splicing GO:000032 GO:007102 GO:000032 (sce04120) Ubiquitin mediated proteolysis; (s  
 Puf6p Pumilio-1 GO:001712 GO:000592 GO:0000900 translation repressor activity, mRNA regul  
 Dck1p Dock family GO:000042 GO:000572 GO:0005085 guanyl-nucleotide exchange factor activity  
 RNA-dependent RNA-Dependent GO:000042 GO:003068 GO:0004004 ATP-dependent RNA helicase activity; GO:000  
 Cmc2p Protein GO:003311 GO:000572 GO:0046872 metal ion binding; GO:0043169 cation binding  
 protein-1 Ribosomal GO:001802 GO:000557 GO:0016279 protein-lysine N-methyltransferase activity  
 hypothetized Protein GO:000812 GO:000562 GO:0003674 molecular\_function  
 None None None None None None  
 forkhead Forkhead GO:190346 GO:000582 GO:0003688 DNA replication origin binding; GO:0001085  
 Jjj2p Protein GO:005108 GO:000562 GO:0051082 unfolded protein binding; GO:0005515 protein  
 retromer Subunit GO:004214 GO:003092 GO:0032266 phosphatidylinositol-3-phosphate binding; GO:0  
 Pho23p Component GO:200021 GO:003362 GO:0004402 histone acetyltransferase activity; GO:0061

hypothetical Putative GO:000815 GO:000562 GO:0030170 pyridoxal phosphate binding; GO:0070279 vit  
 DEAH-box RNA helic GO:000035 GO:007101 GO:003445 (sce03040) Spliceosome  
 None None None None None None  
 Ndc1p Subunit c GO:007175 GO:007076 GO:001705 (sce03013) RNA transport  
 flavodoxin Protein c GO:005511 GO:004512 GO:0010181 FMN binding; GO:0050662 coenzyme binding; GO  
 Jnm1p Component GO:000015 GO:000025 GO:0003774 motor activity; GO:0017111 nucleoside-triph  
 Stplp Transcrip GO:000805 GO:000585 GO:0000978 RNA polymerase II proximal promoter sequen  
 putative Putative GO:000005 GO:004335 GO:000392 (sce03008) Ribosome biogenesis in eukaryotes  
 histone ε Subunit c GO:001657 GO:004665 GO:000440 (Human) (hsa05166) HTLV-I infection  
 Mrx10p Mitochondr GO:000815 GO:000574 GO:0003674 molecular\_function  
 metalloer Mitochondr GO:000662 GO:000575 GO:0004222 metalloendopeptidase activity; GO:0008237 m  
 Cchl1p Voltage-g GO:007055 GO:000585 GO:0005245 voltage-gated calcium channel activity; GO:0  
 Nas2p Evolutio GO:007065 GO:000854 GO:0003674 molecular\_function  
 ssDNA-dep Protein v GO:003355 GO:003085 GO:0043142 single-stranded DNA-dependent ATPase activ  
 galactoki Galactoki GO:000041 GO:000582 GO:000435 (sce) Nucleotide sugar biosynthesis, galactos  
 Nbp2p Protein i GO:000015 GO:000565 GO:0030674 protein binding, bridging; GO:0060090 molec  
 None None None None None None  
 putative Putative GO:007197 GO:000927 GO:0042124 1,3-beta-glucanosyltransferase activity; GO  
 None None None None None None  
 DNA primase Subunit c GO:000625 GO:000565 GO:000385 (sce03030) DNA replication; (sce00240) Pyrimid  
 Ctr86p Essential GO:000905 GO:000565 GO:0003674 molecular\_function  
 Apl6p Beta3-li GO:000662 GO:003012 GO:0003674 molecular\_function  
 None None None None None None  
 hypothetical Putative GO:000815 GO:000557 GO:0003674 molecular\_function  
 RNA-bindin Lsm (Like GO:000095 GO:000565 GO:000372 (sce03018) RNA degradation; (sce03040) Spliceo  
 None None None None None None  
 hypothetical Putative GO:000815 GO:000557 GO:0003674 molecular\_function  
 Arf famil Dubious c GO:003125 GO:000575 GO:001545 (sce03060) Protein export; (sce04145) Phagosom  
 5-formyl15,10-met GO:003595 GO:000575 GO:003027 (sce00670) One carbon pool by folate; (sce0110  
 Finlp Spindle p GO:190242 GO:000025 GO:0005200 structural constituent of cytoskeleton; GO:0  
 None None None None None None  
 hypothetical Putative GO:000815 GO:001602 GO:0003674 molecular\_function  
 H(+)-trar Subunit f GO:000705 GO:000022 GO:004695 (sce04145) Phagosome; (sce00190) Oxidative pho  
 bifunctic DNA N-gly GO:000625 GO:000565 GO:000070 (sce03410) Base excision repair  
 hypothetical Putative GO:000815 GO:000557 GO:0003674 molecular\_function  
 None None None None None None  
 hypothetical Putative GO:000815 GO:000557 GO:0003674 molecular\_function  
 Rho famil Small rhc GO:003135 GO:000594 GO:000392 (sce04933) AGE-RAGE signaling pathway in diab  
 peroxirec Thiol per GO:009885 GO:000575 GO:004705 (sce00590) Arachidonic acid metabolism; (sce00  
 hypothetical Putative protein of unknown function  
 Mlp1p Myosin-li GO:190192 GO:004461 GO:001705 (sce03013) RNA transport  
 phosphati Mitochondr GO:003204 GO:000574 GO:000895 (sce00564) Glycerophospholipid metabolism; (s  
 None None None None None None  
 None None None None None None  
 hypothetical Putative GO:000815 GO:001602 GO:0003674 molecular\_function  
 None None None None None None  
 DNA polyn Third su GO:004315 GO:004362 GO:000831 (sce03410) Base excision repair; (sce03440) Ho  
 None None None None None None  
 hypothetical Putative GO:000815 GO:000557 GO:0003674 molecular\_function  
 putative Putative GO:003015 GO:000561 GO:000425 (sce04138) Autophagy - yeast  
 putative Vacuolar GO:009915 GO:199081 GO:0015662 ATPase activity, coupled to transmembrane  
 Ysp2p Sterol-bi GO:012001 GO:003254 GO:0120015 intermembrane sterol transfer activity; GO:0  
 Yrb30p RanGTP-bi GO:004354 GO:000565 GO:0005096 GTPase activator activity; GO:0030695 GTPas  
 ribosomal Ribosomal GO:001714 GO:002262 GO:000372 (sce03010) Ribosome

DUP240 fPutative GO:001601GO:000032GO:0003674 molecular\_function  
putative Putative GO:000811GO:000557GO:0052689 carboxylic ester hydrolase activity;GO:001  
None None None None None None  
Rif2p Protein tGO:000701GO:007011GO:0042162 telomeric DNA binding;GO:0043565 sequence-  
None None None None None None  
hypothetiPutative GO:000811GO:000557GO:0003674 molecular\_function  
Utr5p Protein cGO:000811GO:000557GO:0003674 molecular\_function  
Rgt1p Glucose-rGO:004632GO:000557GO:0000978 RNA polymerase II proximal promoter sequen  
ribosomalProtein cGO:000041GO:002262GO:000373(sce03010)Ribosome  
Rsc3p ComponentGO:003321GO:001651GO:0015616 DNA translocase activity;GO:0008094 DNA-de  
fumarase Fumarase;GO:000611GO:004521GO:000433(sce)Citrate cycle, second carbon oxidation,  
Phm6p Protein cGO:000811GO:000032GO:0003674 molecular\_function  
hypothetiPutative membrane protein of unknown function  
putative Putative GO:001604GO:000557GO:0047372 acylglycerol lipase activity;GO:0016298 li  
Pac2p MicrotubuGO:000702GO:000557GO:0043014 alpha-tubulin binding;GO:0015631 tubulin b  
Nop12p NucleolarGO:000041GO:003061GO:0003723 RNA binding;GO:0003676 nucleic acid bindin  
Spt23p ER membrGO:003601GO:003017GO:0003674 molecular\_function  
cullin R1Cullin sGO:007061GO:003531GO:0004842 ubiquitin-protein transferase activity;GO:0  
L-itol Sorbitol GO:001931GO:000557GO:000393(sce00040)Pentose and glucuronate interconve  
peptidylPeptidyl-GO:000041GO:000032GO:0016018 cyclosporin A binding;GO:0003755 peptidyl-  
peptidylPeptidyl-GO:000041GO:000032GO:0016018 cyclosporin A binding;GO:0003755 peptidyl-  
None None None None None None  
serine/thSerine/thGO:003331GO:003581GO:000467(sce04111)Cell cycle - yeast; (sce04113)Meio  
hypothetiPutative GO:000811GO:000557GO:0003674 molecular\_function  
Zip1p TransversGO:004512GO:000081GO:003211(sce04113)Meiosis - yeast  
Rpd3L hisComponentGO:190052GO:003361GO:0004407 histone deacetylase activity;GO:0033558 pr  
hypothetiProtein cGO:000811GO:007261GO:0003674 molecular\_function  
ubiquitinUbiquitinGO:001657GO:000557GO:0004843 thiol-dependent ubiquitin-specific proteas  
glycogen Glycogen GO:000597GO:000557GO:000437(sce00500)Starch and sucrose metabolism; (sc  
hypothetiPutative GO:000811GO:000557GO:0003674 molecular\_function  
Pet122p MitochondGO:007011GO:003131GO:0003743 translation initiation factor activity;GO:0  
serine/thProtein lGO:004487GO:003217GO:000554(sce04111)Cell cycle - yeast  
Isc10p Protein rGO:003041GO:000557GO:0003674 molecular\_function  
inositol Inositol GO:000602GO:000557GO:005283(sce00562)Inositol phosphate metabolism; (sc  
NADH/NAD+ATP-NADH GO:000674GO:000557GO:0042736 NADH kinase activity;GO:0003951 NAD+ kinas  
hypothetiPutative GO:000811GO:000557GO:0003674 molecular\_function  
O-acyltrPlasma mGO:001951GO:000557GO:0008374 O-acyltransferase activity;GO:0015293 symp  
exomer cMember ofGO:003422GO:003404GO:0043022 ribosome binding;GO:0043021 ribonucleoprot  
phosphoac3'-phosphGO:001937GO:000557GO:000461(M00176)Assimilatory sulfate reduction, sulf  
Yft2p Protein rGO:003431GO:003017GO:0003674 molecular\_function  
U5 snRNP Non-esserGO:000811GO:000557GO:0005515 protein binding;GO:0005488 binding;GO:0003  
Pef1p Penta-EF-GO:000341GO:000557GO:0005509 calcium ion binding;GO:0008270 zinc ion bi  
anaphase Largest sGO:003114GO:000557GO:003294(sce04120)Ubiquitin mediated proteolysis; (s  
Sls1p MitochondGO:000901GO:004264GO:0003674 molecular\_function  
None None None None None None  
Pdc2p TranscripGO:200117GO:000557GO:0000978 RNA polymerase II proximal promoter sequen  
Gyp6p GTPase-acGO:009061GO:003011GO:0017137 Rab GTPase binding;GO:0005096 GTPase activ  
None None None None None None  
Amf1p Low affirGO:003544GO:000557GO:0008519 ammonium transmembrane transporter activit  
DNA-bindOrigin-biGO:000141GO:004359GO:0061630 ubiquitin protein ligase activity;GO:00616  
None None None None None None  
Hsp70 fanHsp70 fanGO:003207GO:000141GO:004411(sce03018)RNA degradation  
DNA repaiComponentGO:199061GO:003091GO:0019789 SUMO transferase activity;GO:0003684 damag  
Smc5-Smc6ComponentGO:001692GO:003091GO:0019789 SUMO transferase activity;GO:0019787 ubiqu

Brrlp snRNP prcGO:000024GO:0030532 small nuclear ribonucleoprotein complex;GO:0120114  
 pantotherPantotherGO:001595GO:000565GO:000455(sce)Coenzyme A biosynthesis, pantothenate =  
 hypothetiPutative GO:004535GO:00058(GO:0003674 molecular\_function  
 None None None None None None  
 None None None None None None  
 RNA polynCTD phosGO:007094GO:000565GO:0008420 RNA polymerase II CTD heptapeptide repeat  
 Uip5p Protein cGO:000702GO:003015GO:0005537 mannose binding;GO:0048029 monosaccharide  
 SBF complDNA bindiGO:007195GO:00309(GO:000122(sce04011)MAPK signaling pathway - yeast; (s  
 Med4p Subunit cGO:000635GO:007084GO:0000979 RNA polymerase II core promoter sequence-s  
 U4/U6-U5 Splicing GO:000024GO:00710(GO:000367(sce03040)Spliceosome  
 aurora kiAurora kiGO:009026GO:000582GO:0035174 histone serine kinase activity;GO:0035173  
 kinesin Kinesin GO:000007GO:000582GO:0008569 ATP-dependent microtubule motor activity,  
 hypothetiPutative GO:000815GO:000557GO:0003674 molecular\_function  
 ribosomalRibosomalGO:003214GO:002262GO:003029(sce03010)Ribosome  
 AMP deamiAMP deamiGO:000617GO:000582GO:000387(sce00230)Purine metabolism; (sce01130)Biosyn  
 None None None None None None  
 None None None None None None  
 Rxt2p ComponentGO:200021GO:003365GO:0004407 histone deacetylase activity;GO:0033558 pr  
 AAA familAAA-ATPasGO:007067GO:00100(GO:001688(sce04144)Endocytosis  
 hypothetiDubious cGO:000815GO:000557GO:0003674 molecular\_function  
 None None None None None None  
 hypothetiProtein tGO:000815GO:003196GO:0035091 phosphatidylinositol binding;GO:0005543 ph  
 karyopherKaryopherGO:003114GO:004256GO:0061608 nuclear import signal receptor activity;GO  
 None None None None None None  
 Mak10p Non-catalGO:001715GO:003141GO:0004596 peptide alpha-N-acetyltransferase activity  
 Spc34p EssentialGO:005195GO:004272GO:0051010 microtubule plus-end binding;GO:0008017 mi  
 ribonucleNuclear cGO:003084GO:000575GO:000452(sce03008)Ribosome biogenesis in eukaryotes  
 ribosomalProtein cGO:000046GO:002262GO:000375(sce03010)Ribosome  
 hypothetiPutative GO:000815GO:000557GO:0003674 molecular\_function  
 hypothetiPutative GO:000815GO:000557GO:0003674 molecular\_function  
 None None None None None None  
 transcripTranscripGO:190046GO:000079GO:004437(sce04011)MAPK signaling pathway - yeast; (s  
 ribosomalRibosomalGO:000215GO:002262GO:000375(sce03010)Ribosome  
 exosome rExosome rGO:007105GO:000017GO:000372(sce03018)RNA degradation  
 hypothetiPutative GO:000815GO:000557GO:0003674 molecular\_function  
 iron-sulfComponentGO:000205GO:009736GO:0003674 molecular\_function  
 DNA-bindidDNA bindiGO:003046GO:000011GO:0044374 sequence-specific DNA binding, bending;GO:  
 Urb1p Protein rGO:000046GO:000575GO:0003729 mRNA binding;GO:0003723 RNA binding;GO:000  
 14-3-3 f14-3-3 prGO:003422GO:000588GO:005081(sce04011)MAPK signaling pathway - yeast  
 UTP--glucPutative GO:000601GO:000575GO:000395(M00549)Nucleotide sugar biosynthesis, gluco  
 mRNA spliCore Sm rGO:000035GO:000024GO:000372(sce03040)Spliceosome  
 None None None None None None  
 hypothetiProtein vGO:000815GO:000575GO:0016887 ATPase activity;GO:0017111 nucleoside-trip  
 H(+)-trarVacuolar GO:000705GO:000022GO:004696(sce04145)Phagosome; (sce00190)Oxidative pho  
 ureidoglyUreidoglyGO:000025GO:001602GO:005035(sce00230)Purine metabolism; (sce01100)Metab  
 hypothetiPutative GO:000815GO:001602GO:0003674 molecular\_function  
 sphingosCeramide GO:004651GO:006157GO:0050291 sphingosine N-acyltransferase activity;GO:  
 Nup133p Subunit cGO:003535GO:003105GO:001705(sce03013)RNA transport  
 None None None None None None  
 ATP-deperEssentialGO:000046GO:003068GO:0034459 ATP-dependent 3'-5' RNA helicase activity;  
 None None None None None None  
 cohesin-lSubunit cGO:007055GO:003211GO:004351(sce04111)Cell cycle - yeast  
 hypothetiPutative GO:000815GO:000557GO:0003674 molecular\_function  
 pseudouritRNA:pseiGO:003111GO:000575GO:0106029 tRNA pseudouridine synthase activity;GO:00

|                     |                                                                                  |           |           |            |                                                |
|---------------------|----------------------------------------------------------------------------------|-----------|-----------|------------|------------------------------------------------|
| None                | None                                                                             | None      | None      | None       | None                                           |
| Mup1p               | High affinity                                                                    | GO:190361 | GO:000032 | GO:0000102 | L-methionine secondary active transmembran     |
| TRAPP subunit       | Core component                                                                   | GO:000681 | GO:199007 | GO:0017112 | Rab guanyl-nucleotide exchange factor acti     |
| elongin A           | Elongin A                                                                        | GO:000651 | GO:007044 | GO:0004842 | ubiquitin-protein transferase activity;GO:     |
| DNA polymerase      | Third-lar                                                                        | GO:007081 | GO:000862 | GO:000831  | (sce03410)Base excision repair; (sce03030)DN   |
| None                | None                                                                             | None      | None      | None       | None                                           |
| Rrs1p               | Essential                                                                        | GO:000001 | GO:003061 | GO:0003674 | molecular_function                             |
| None                | None                                                                             | None      | None      | None       | None                                           |
| adenosine           | Adenosine                                                                        | GO:009031 | GO:000561 | GO:0043530 | adenosine 5'-monophosphoramidase activity;     |
| hypothetical        | Putative                                                                         | GO:000811 | GO:000581 | GO:0003674 | molecular_function                             |
| DNA-directed        | RNA polymerase                                                                   | GO:004271 | GO:000571 | GO:000101  | (sce03020)RNA polymerase; (sce00240)Pyrimidin  |
| None                | None                                                                             | None      | None      | None       | None                                           |
| None                | None                                                                             | None      | None      | None       | None                                           |
| None                | None                                                                             | None      | None      | None       | None                                           |
| DNA-directed        | B subunit                                                                        | GO:000627 | GO:000561 | GO:000381  | (sce03030)DNA replication; (sce00240)Pyrimidin |
| glycerophospholipid | Glycerophospholipid                                                              | GO:000661 | GO:000571 | GO:0071617 | lysophospholipid acyltransferase activity;     |
| rRNA-processing     | Protein v                                                                        | GO:000631 | GO:000571 | GO:0003674 | molecular_function                             |
| Lam5p               | Putative                                                                         | GO:003231 | GO:007151 | GO:0015248 | sterol transporter activity;GO:0005319 lip     |
| putative            | Putative                                                                         | GO:000711 | GO:000561 | GO:0004674 | protein serine/threonine kinase activity;G     |
| putative            | Putative                                                                         | GO:000941 | GO:000581 | GO:000841  | (sce00750)Vitamin B6 metabolism; (sce01100)M   |
| mRNA-binding        | Posttrans                                                                        | GO:004341 | GO:000571 | GO:0003730 | mRNA 3'-UTR binding;GO:0003729 mRNA bindin     |
| mismatch            | Protein i                                                                        | GO:000071 | GO:009751 | GO:003091  | (sce03430)Mismatch repair                      |
| Avt1p               | Vacuolar                                                                         | GO:001581 | GO:000032 | GO:0015188 | L-isoleucine transmembrane transporter act     |
| putative            | Subunit c                                                                        | GO:003631 | GO:009761 | GO:0004842 | ubiquitin-protein transferase activity;GO:     |
| Vbalp               | Permease                                                                         | GO:199081 | GO:000032 | GO:0015174 | basic amino acid transmembrane transporter     |
| histone             | Catalytic                                                                        | GO:000631 | GO:000011 | GO:001041  | (Human) (hsa05034)Alcoholism                   |
| cell proliferation  | Assembly                                                                         | GO:190511 | GO:000571 | GO:0000287 | magnesium ion binding;GO:0005524 ATP bindi     |
| mitochondrial       | Mitochondrial                                                                    | GO:003251 | GO:000571 | GO:0005525 | GTP binding;GO:0032550 purine ribonucleosi     |
| Pkr1p               | V-ATPase                                                                         | GO:007001 | GO:003011 | GO:0003674 | molecular_function                             |
| Rfa3p               | Subunit c                                                                        | GO:000621 | GO:000561 | GO:0003690 | double-stranded DNA binding;GO:0043565 seq     |
| signal recognition  | Subunit c                                                                        | GO:000661 | GO:000571 | GO:0003723 | RNA binding;GO:0003676 nucleic acid bindin     |
| Mtr10p              | Nuclear i                                                                        | GO:000641 | GO:003431 | GO:0008536 | Ran GTPase binding;GO:0008565 protein tran     |
| hypothetical        | Dubious c                                                                        | GO:000811 | GO:000551 | GO:0003674 | molecular_function                             |
| Slx4p               | Endonucle                                                                        | GO:190521 | GO:003351 | GO:0017108 | 5'-flap endonuclease activity;GO:0048256 f     |
| threonine           | Mitochondrial                                                                    | GO:007011 | GO:000571 | GO:000481  | (sce00970)Aminoacyl-tRNA biosynthesis          |
| None                | None                                                                             | None      | None      | None       | None                                           |
| None                | None                                                                             | None      | None      | None       | None                                           |
| alpha, alpha        | Acid tre                                                                         | GO:007141 | GO:003021 | GO:000451  | (sce00500)Starch and sucrose metabolism; (sc   |
| None                | None                                                                             | None      | None      | None       | None                                           |
| hypothetical        | Protein of unknown function; mRNA identified as translated by ribosome profiling |           |           |            |                                                |
| hypothetical        | Putative                                                                         | GO:004241 | GO:000571 | GO:0003674 | molecular_function                             |
| hypothetical        | Putative                                                                         | GO:000811 | GO:000551 | GO:0003674 | molecular_function                             |
| hypothetical        | Predicted                                                                        | GO:000811 | GO:000581 | GO:0043022 | ribosome binding;GO:0043021 ribonucleoprot     |
| ribosomal           | Protein c                                                                        | GO:000041 | GO:002261 | GO:000371  | (sce03010)Ribosome                             |
| ribosomal           | Conserved                                                                        | GO:000001 | GO:003061 | GO:007011  | (sce03010)Ribosome                             |
| Golgi trans         | Essential                                                                        | GO:000031 | GO:001711 | GO:0030674 | protein binding, bridging;GO:0060090 molec     |
| apyrase             | Apurase v                                                                        | GO:000661 | GO:003011 | GO:010241  | (sce00240)Pyrimidine metabolism; (sce00230)P   |
| hypothetical        | Protein c                                                                        | GO:000811 | GO:000551 | GO:0003674 | molecular_function                             |
| nitrogen            | Subunit c                                                                        | GO:190381 | GO:009701 | GO:000361  | (Human) (hsa04150)mTOR signaling pathway       |
| guanine             | Guanine c                                                                        | GO:000611 | GO:000571 | GO:000881  | (sce00230)Purine metabolism; (sce01100)Metab   |
| Tnalp               | High affinity                                                                    | GO:190321 | GO:000032 | GO:0046943 | carboxylic acid transmembrane transporter      |
| bifunctional        | Aromatic                                                                         | GO:001951 | GO:000571 | GO:008011  | (M00024)Phenylalanine biosynthesis, chorisma   |
| None                | None                                                                             | None      | None      | None       | None                                           |
| Rrp15p              | Nucleolar                                                                        | GO:000041 | GO:003061 | GO:0003674 | molecular_function                             |

hypothetiPutative GO:000815GO:000557GO:0003674 molecular\_function  
 None None None None None None  
 mitogen-εSerine/tlGO:001097GO:000595GO:000470(sce04139)Mitophagy - yeast; (sce04138)Autophagy  
 E2 ubiquitinUbiquitinGO:00346(GO:000015GO:007062(sce04120)Ubiquitin mediated proteolysis; (sce04120)Ubiquitin  
 tRNA 2'-5' phosphotransferase activity;GO:000635GO:000562GO:0000215 tRNA 2'-phosphotransferase activity;GO:000635GO:000562GO:0000215  
 guanosineGuanosineGO:000645GO:000015GO:000435(Human)(hsa00240)Pyrimidine metabolism; (hsa00240)Pyrimidine metabolism; (hsa00240)Pyrimidine metabolism  
 ribosomalRibosomalGO:000215GO:002262GO:000375(sce03010)Ribosome  
 Dsslp 3'-5' exonuclease II activity;GO:000095GO:004502GO:0008859 exoribonuclease II activity;GO:0000175 3'-5' exonuclease II activity;GO:000095GO:004502GO:0008859  
 hypothetiPutative GO:000815GO:000015GO:0003674 molecular\_function  
 ESCRT-IIIOne of fGO:19046(GO:000081GO:000367(sce04144)Endocytosis  
 None None None None None None  
 Utp13p NucleolarGO:000047GO:003435(Human)GO:0003008Ribosome biogenesis in eukaryotes  
 Dur3p Plasma membraneGO:004341GO:000578GO:0015489 putrescine transmembrane transporter activity;GO:004341GO:000578GO:0015489  
 Rtt102p ComponentGO:000635GO:001655GO:0015616 DNA translocase activity;GO:0008094 DNA-degradation  
 adenosyl7,8-diamineGO:00091(GO:000575GO:000414(sce00780)Biotin metabolism; (sce01100)Metabolism  
 Rad24p CheckpointGO:003331GO:003135GO:000368(sce04111)Cell cycle - yeast; (sce04113)Meiosis  
 signal receptorCore componentGO:000661GO:000578GO:003094(sce03060)Protein export  
 ribosomalRibosomalGO:000002GO:003068GO:001984(sce03010)Ribosome  
 Sdd2p Protein vGO:001042GO:000582GO:0003677 DNA binding;GO:0003676 nucleic acid binding  
 ribosomalProtein cGO:004227GO:002262GO:000375(sce03010)Ribosome  
 None None None None None None  
 methyleneNAD-dependentGO:000911GO:000582GO:000445(sce00670)One carbon pool by folate; (sce01100)One carbon pool by folate; (sce01100)One carbon pool by folate  
 Ics3p Protein vGO:005507GO:001602GO:0003674 molecular\_function  
 Gmc2p Protein iGO:000715GO:000079GO:0003674 molecular\_function  
 hypothetiPutative GO:000815GO:001602GO:0003674 molecular\_function  
 None None None None None None  
 Rho familyGuanine rGO:19035(GO:000015GO:000505(sce04011)MAPK signaling pathway - yeast  
 Mms22p Subunit cGO:004514GO:003536GO:0003674 molecular\_function  
 Nvj1p Nuclear envelopeGO:007155GO:0071561 nucleus-vacuole junction;GO:0005640 nuclear outer membrane  
 ribosomalRibosomalGO:000045GO:001045GO:000375(sce03010)Ribosome  
 peptidylPeptidylGO:200074GO:000582GO:000095(Human)(hsa04622)RIG-I-like receptor signaling pathway  
 hypothetiPutative GO:000815GO:000557GO:0003674 molecular\_function  
 Ecm30p Protein cGO:007155GO:000015GO:0003674 molecular\_function  
 DNA-directedRNA polymeraseGO:004275GO:000575GO:000105(sce03020)RNA polymerase; (sce00240)Pyrimidine metabolism  
 None None None None None None  
 None None None None None None  
 Warlp HomodimerGO:00614(GO:000575GO:0000981 DNA-binding transcription factor activity, DNA-binding transcription factor activity;GO:00614(GO:000575GO:0000981  
 hypothetiPutative GO:000815GO:000557GO:0003674 molecular\_function  
 None None None None None None  
 Ssulp Plasma membraneGO:000031GO:000578GO:0000319 sulfite transmembrane transporter activity;GO:000031GO:000578GO:0000319  
 ribosomalRibosomalGO:000215GO:002262GO:000375(sce03010)Ribosome  
 Msp1p Highly-conservedGO:000662GO:000577GO:0016887 ATPase activity;GO:0017111 nucleoside-triphosphatase activity;GO:000662GO:000577GO:0016887  
 hypothetiPutative GO:001715GO:000578GO:0016603 glutamyl-peptide cyclotransferase activity;GO:001715GO:000578GO:0016603  
 None None None None None None  
 homeodomainHomeobox-GO:000115GO:000562GO:000830(sce04113)Meiosis - yeast  
 Ctf8p Subunit cGO:003575GO:003135GO:0003677 DNA binding;GO:0003676 nucleic acid binding  
 rRNA-processingSubunit cGO:000047GO:003204GO:0003674 molecular\_function  
 Mrs2p MitochondrialGO:004501GO:000574GO:0015095 magnesium ion transmembrane transporter activity;GO:004501GO:000574GO:0015095  
 hypothetiPutative GO:000815GO:001602GO:0003674 molecular\_function  
 mitochondrialSubunit cGO:00061(GO:000935GO:0004591 oxoglutarate dehydrogenase (succinyl-transferring) activity;GO:00061(GO:000935GO:0004591  
 Mig2p Zinc fingerGO:000045GO:000575GO:0001227 DNA-binding transcription repressor activity, DNA-binding transcription repressor activity;GO:000045GO:000575GO:0001227  
 amino acidMitochondrialGO:007077GO:199081GO:0015183 L-aspartate transmembrane transporter activity;GO:007077GO:199081GO:0015183  
 Kap122p KaryopherinGO:00066(GO:000564GO:0008565 protein transporter activity;GO:0005215 transport activity;GO:00066(GO:000564GO:0008565  
 putative Putative GO:000815GO:000562GO:00052689 carboxylic ester hydrolase activity;GO:000815GO:000562GO:00052689

acid phosphatase Repressil GO:001605 GO:000927 GO:004742 (sce00740) Riboflavin metabolism; (sce00730) Tl  
Y' element Helicase GO:000072 GO:000562 GO:0003678 DNA helicase activity; GO:0004386 helicase  
None None None None None None  
bifunctional Enzyme of GO:000615 GO:000582 GO:000395 (M00048) Inosine monophosphate biosynthesis, l  
Rsa3p Protein v GO:000002 GO:003068 GO:0003674 molecular\_function  
Sdc1p Subunit c GO:000634 GO:004818 GO:0042800 histone methyltransferase activity (H3-K4  
ATP-binding Plasma m GO:003537 GO:000575 GO:000855 (sce02010) ABC transporters  
Hem25p Mitochondrion GO:190495 GO:000574 GO:0015187 glycine transmembrane transporter activity  
NADPH dehydrogenase Conserved GO:000691 GO:000557 GO:0018548 pentaerythritol trinitrate reductase activ  
negative Subunit c GO:00614 (GO:001705 GO:0017025 TBP-class protein binding; GO:0001047 core  
MRX complex Nuclease GO:001075 GO:003087 GO:000829 (sce03450) Non-homologous end-joining; (sce03  
None None None None None None  
Thp2p Subunit c GO:00064 (GO:000044 GO:0003676 nucleic acid binding; GO:1901363 heterocycl  
bifunctional Similar t GO:000611 GO:000582 GO:000435 (sce00051) Fructose and mannose metabolism  
dynein heavy Cytoplasm GO:007235 GO:000025 GO:000856 (sce04145) Phagosome  
dolichyl-Alpha 1,5 GO:000645 GO:000578 GO:004228 (sce) N-glycan precursor biosynthesis; (M00051  
None None None None None None  
E3 ubiquitin E3 ubiquitin GO:003157 GO:000078 GO:0003688 DNA replication origin binding; GO:0004842  
Ina17p F1F0 ATPase GO:003361 GO:199052 GO:0003674 molecular\_function  
Rdilp Rho GDP c GO:003285 GO:000595 GO:000505 (Human) (hsa04962) Vasopressin-regulated water  
None None None None None None  
None None None None None None  
Dig2p MAP kinase GO:200021 GO:199052 GO:000815 (sce04011) MAPK signaling pathway - yeast  
glycine-- Cytoplasm GO:007015 GO:000575 GO:000482 (sce00970) Aminoacyl-tRNA biosynthesis  
None None None None None None  
tyrosine Protein r GO:003535 GO:000562 GO:000395 (sce00740) Riboflavin metabolism; (sce00730) Tl  
Mn(2+) transporter Golgi membrane GO:003002 GO:000032 GO:0005384 manganese ion transmembrane transporter ac  
Pcl17p Pho85p cy GO:000595 GO:00003 (GO:0016538 cyclin-dependent protein serine/threonine  
Nhp10p Non-essential GO:004276 GO:003101 GO:0000404 heteroduplex DNA loop binding; GO:0045027 D  
Lcd1p Essential GO:00070 (GO:000022 GO:000368 (sce04111) Cell cycle - yeast  
Emp70p Protein v GO:00014 (GO:000032 GO:0003674 molecular\_function  
DNA replication Subunit c GO:190295 GO:007116 GO:0043138 3'-5' DNA helicase activity; GO:0003678 DNA  
U2-type c Component GO:000035 GO:000562 GO:0003674 molecular\_function  
U2 snRNP Component GO:000035 GO:000562 GO:003062 (sce03040) Spliceosome  
Y' element Putative GO:000815 GO:000557 GO:0004386 helicase activity; GO:0017111 nucleoside-tr  
exocyst c Essential GO:009052 GO:000014 GO:0003674 molecular\_function  
hypothetical Protein c GO:000815 GO:001602 GO:0003674 molecular\_function  
Nst1p Protein c GO:000965 GO:000575 GO:0003674 molecular\_function  
putative Vacuolar GO:003285 GO:000032 GO:0004674 protein serine/threonine kinase activity; G  
putative Putative GO:000711 GO:000595 GO:0008496 mannan endo-1,6-alpha-mannosidase activity  
Atg27p Type I m GO:003445 GO:003404 GO:003226 (sce04138) Autophagy - yeast  
peptide-- Conserved GO:009746 GO:000575 GO:000022 (sce04141) Protein processing in endoplasmic  
replication Nucleolar GO:003155 GO:003355 GO:004311 (sce04111) Cell cycle - yeast  
ribosomal Ribosomal GO:190262 GO:002262 GO:000375 (sce03010) Ribosome  
glutamine Glutamine GO:000945 GO:000562 GO:000395 (sce00760) Nicotinate and nicotinamide metabo  
RuvB family ATP-dependent GO:000045 GO:000572 GO:0043141 ATP-dependent 5'-3' DNA helicase activity; G  
Bet1p Type II n GO:00069 (GO:000015 GO:000548 (sce04130) SNARE interactions in vesicular tra  
ribosomal Protein c GO:000045 GO:002262 GO:000375 (sce03010) Ribosome  
single-stranded Poly (A+) GO:200081 GO:007101 GO:0043047 single-stranded telomeric DNA binding; GO:0  
putative Putative GO:003254 GO:000574 GO:0003924 GTPase activity; GO:0005525 GTP binding; GO:0  
Rog3p Alpha-arr GO:000075 GO:000582 GO:0031625 ubiquitin protein ligase binding; GO:004438  
ADP-ribosyl Nudix hydrolase GO:001965 GO:000575 GO:004765 (sce00230) Purine metabolism  
Epl1p Subunit c GO:001625 GO:003277 GO:0004402 histone acetyltransferase activity; GO:0061  
cardiolipin Cardiolipin GO:003204 GO:000574 GO:000880 (sce00564) Glycerophospholipid metabolism; (s

Mec3p DNA damage GO:003331 GO:003089 GO:000367 (sce04111) Cell cycle - yeast; (sce04113) Meiosis  
Msolp Lipid-int GO:003218 GO:003316 GO:0003674 molecular\_function  
septin ClComponent GO:003218 GO:000014 GO:0010314 phosphatidylinositol-5-phosphate binding; GO:  
H(+)-trans Subunit GO:000709 GO:000022 GO:004696 (sce04145) Phagosome; (sce00190) Oxidative phos  
Ecm1lp Meiosis GO:199041 GO:000079 GO:0003674 molecular\_function  
Ran GTPase Nuclear GO:007152 GO:001636 GO:000855 (sce03013) RNA transport  
ethanol mProtein GO:000606 GO:000574 GO:000367 (sce04146) Peroxisome  
hypotheti Putative protein of unknown function; originally identified based on homology to  
translati Gamma su GO:000641 GO:000585 GO:0003746 translation elongation factor activity; GO:  
hypotheti Putative GO:005508 GO:000032 GO:004262 (Human) (hsa04975) Fat digestion and absorptio  
None None None None None None  
Acklp Protein GO:003151 GO:000575 GO:0008047 enzyme activator activity; GO:0030234 enzym  
branched-High-affi GO:001582 GO:000578 GO:0015171 amino acid transmembrane transporter activ  
hexokinase Putative GO:000609 GO:000582 GO:001915 (M00549) Nucleotide sugar biosynthesis, gluco  
hypotheti Putative GO:000815 GO:000557 GO:0003674 molecular\_function  
Aim6p Protein GO:000662 GO:000557 GO:0008081 phosphoric diester hydrolase activity; GO:0  
uracil p Uracil p GO:004420 (Human) GO:000484 (sce00240) Pyrimidine metabolism; (sce01100) M  
mitochondr Mitochondr GO:007012 GO:000576 GO:0003735 structural constituent of ribosome; GO:0005  
GTP-Rho l Subunit GO:009052 GO:000562 GO:0017049 GTP-Rho binding; GO:0005546 phosphatidyli  
1,3-beta-Catalytic GO:000607 GO:000014 GO:000384 (sce00500) Starch and sucrose metabolism; (sc  
mitochondr Mitochondr GO:003254 GO:000576 GO:007018 (sce03010) Ribosome  
hypotheti Putative GO:001715 GO:000557 GO:0008999 ribosomal-protein-alanine N-acetyltransfer  
oxidoreduct Mitochondr GO:001806 GO:003131 GO:0016491 oxidoreductase activity; GO:0003824 catalyt  
polynucle Poly (A) GO:007105 GO:000584 GO:000465 (sce03015) mRNA surveillance pathway  
hypotheti Putative GO:000815 GO:000557 GO:0003674 molecular\_function  
Afglp Protein GO:001655 GO:000574 GO:0016887 ATPase activity; GO:0017111 nucleoside-trip  
Mtc6p Protein GO:000815 GO:000032 GO:0003674 molecular\_function  
hypotheti Putative GO:000815 GO:000557 GO:0003674 molecular\_function  
Rfm1p Component GO:003225 GO:000565 GO:0030674 protein binding, bridging; GO:0060090 molec  
Tsc3p Protein GO:009015 GO:003535 GO:0008047 enzyme activator activity; GO:0030234 enzym  
mitochondr Mitochondr GO:003254 GO:000576 GO:0003735 structural constituent of ribosome; GO:0005  
Ttilp Subunit GO:000632 GO:007020 GO:0003674 molecular\_function  
bifuncti Bifuncti GO:000045 GO:000575 GO:004372 (sce00740) Riboflavin metabolism; (sce01100) M  
hypotheti F-box pr GO:003114 GO:001900 GO:0030674 protein binding, bridging; GO:0004842 ubiqu  
Dsf2p Deletion GO:004308 GO:000595 GO:0008047 enzyme activator activity; GO:0030234 enzym  
MCM DNA l Protein GO:000626 GO:007116 GO:199016 (sce03030) DNA replication; (sce04111) Cell cy  
Mfb1p Mitochondr GO:003114 GO:003131 GO:0003674 molecular\_function  
ubiquitin Ubiquitin GO:001095 GO:000562 GO:0004843 thiol-dependent ubiquitin-specific proteas  
Osw2p Protein GO:003047 GO:000562 GO:0003674 molecular\_function  
cleavage Endoribor GO:003424 GO:000584 GO:000840 (sce03015) mRNA surveillance pathway  
phenylal Alpha su GO:000645 GO:000932 GO:000482 (sce00970) Aminoacyl-tRNA biosynthesis  
hypotheti Protein GO:000815 GO:000578 GO:0003674 molecular\_function  
N-acetyl N-acetyl GO:004245 GO:000565 GO:0008080 N-acetyltransferase activity; GO:0016410 N-  
Ubslp Ubiquitin GO:000661 GO:000565 GO:0003674 molecular\_function  
hypotheti Non-esser GO:000815 GO:000565 GO:0003674 molecular\_function  
phosphori Formylgly GO:000618 GO:000575 GO:000464 (M00048) Inosine monophosphate biosynthesis, l  
Tda9p Transcri GO:001941 GO:000079 GO:0000981 DNA-binding transcription factor activity,  
hypotheti Putative GO:000815 GO:000557 GO:0003674 molecular\_function  
glutamine High-affi GO:003552 GO:000595 GO:0015193 L-proline transmembrane transporter activi  
None None None None None None  
hypotheti Putative GO:000815 GO:001602 GO:0003674 molecular\_function  
None None None None None None  
CCR4-NOT Subunit GO:003296 GO:003001 GO:0003674 molecular\_function  
Sm-like l Lsm (Like GO:000809 GO:000568 GO:000372 (sce03018) RNA degradation; (sce03040) Spliceo



Mds3p Putative GO:007525GO:000575GO:0003674 molecular\_function  
Lem3p Membrane GO:001591GO:199055GO:0015247 aminophospholipid transmembrane transporter  
ribonucleoside Subunit cGO:003496GO:000565GO:000452 (sce03008)Ribosome biogenesis in eukaryotes;  
Sft1p Intra-GolGO:000685GO:000015GO:000545 (sce04130)SNARE interactions in vesicular tra  
Fus2p Cell fusionGO:003135GO:004335GO:0005089 Rho guanyl-nucleotide exchange factor acti  
putative NitrohydrolaseGO:000688GO:000575GO:0016810 hydrolase activity, acting on carbon-nitro  
cyclin-dependent CatalyticGO:004590GO:007065GO:0008353 RNA polymerase II CTD heptapeptide repeat  
Tmt1p Trans-acylationGO:003225GO:000582GO:0046547 trans-aconitate 3-methyltransferase activi  
farnesyltransferaseGeranylgeranyltransferaseGO:003335GO:000575GO:000416 (sce00900)Terpenoid backbone biosynthesis; (s  
aspartateAspartateGO:000905GO:000575GO:000407 (sce00261)Monobactam biosynthesis; (M00018)Tl  
hypotheticalPutative GO:000815GO:000557GO:0003674 molecular\_function  
peptidyltransferasePeptidyl-GO:190171GO:000575GO:0005527 macrolide binding;GO:0003755 peptidyl-prol  
hypotheticalPutative GO:000815GO:001602GO:0003674 molecular\_function  
Ldb17p Protein iGO:000685GO:003047GO:0003674 molecular\_function  
succinateMinor succinateGO:000612GO:004525GO:000817 (sce)Citrate cycle, second carbon oxidation,  
H(+)-transporterSubunit cGO:000705GO:000022GO:000855 (sce04145)Phagosome; (sce00190)Oxidative phos  
Trs85p ComponentGO:007125GO:199007GO:0003674 molecular\_function  
Spo24p Small (67GO:003045GO:000562GO:0003674 molecular\_function  
cyclin-dependent Cyclin-dependentGO:190350GO:000025GO:000465 (sce04011)MAPK signaling pathway - yeast; (s  
25S rRNA NucleolarGO:003115GO:003065GO:0106142 rRNA (adenine-N1-)-methyltransferase activ  
histone acetyltransferaseCatalyticGO:003295GO:004665GO:001045 (Human) (hsa04330)Notch signaling pathway; (h  
lysine--tRNA synthetaseMitochondrialGO:007015GO:000575GO:000482 (sce00970)Aminoacyl-tRNA biosynthesis  
hypotheticalPutative GO:000815GO:000557GO:0003674 molecular\_function  
TFIIH coreSerine/threonine kinaseGO:190001GO:007095GO:001991 (sce03022)Basal transcription factors; (sce0  
putative Putative GO:000605GO:000557GO:000455 (sce00520)Amino sugar and nucleotide sugar m  
Rmd9p MitochondrialGO:004345GO:003131GO:0003729 mRNA binding;GO:0003723 RNA binding;GO:000  
None None None None None None  
seripaupProtein cGO:003150GO:000927GO:0005199 structural constituent of cell wall;GO:000  
zinc-coordinatingRegulatesGO:006095GO:000565GO:0003677 DNA binding;GO:0046872 metal ion binding;GO  
mitochondrialMitochondrialGO:001714GO:000575GO:000372 (sce03010)Ribosome  
protein tEssentialGO:004505GO:004272GO:0008565 protein transporter activity;GO:0051082 un  
None None None None None None  
hypotheticalPutative GO:000815GO:001602GO:0003674 molecular\_function  
coatamer Zeta subunitGO:000685GO:003012GO:0003674 molecular\_function  
hypotheticalProtein cGO:000815GO:000584GO:0043022 ribosome binding;GO:0043021 ribonucleoprot  
protein cMember ofGO:004545GO:000032GO:001915 (sce04141)Protein processing in endoplasmic r  
TRAMP coreRNA-bindingGO:007105GO:003145GO:003445 (sce03018)RNA degradation  
Fmc1p MitochondrialGO:003361GO:000575GO:000367 (sce04139)Mitophagy - yeast  
ribosomalRibosomalGO:000215GO:002262GO:000375 (sce03010)Ribosome  
Emp24p ComponentGO:000665GO:003015GO:0003674 molecular\_function  
hypotheticalPutative GO:000815GO:000557GO:0003674 molecular\_function  
peptidyltransferasePeptidyl-GO:004365GO:000015GO:0008160 protein tyrosine phosphatase activator act  
hypotheticalPutative GO:000815GO:000032GO:0003674 molecular\_function  
tRNA spliceSubunit cGO:000037GO:000021GO:0000213 tRNA-intron endonuclease activity;GO:00168  
putative Putative GO:003225GO:000584GO:0043022 ribosome binding;GO:0043021 ribonucleoprot  
hypotheticalPutative GO:000815GO:000557GO:0003674 molecular\_function  
palmitoyltransferasePalmitoylGO:001825GO:000032GO:0019706 protein-cysteine S-palmitoyltransferase ac  
retromer Subunit cGO:004214GO:003090GO:000855 (sce04144)Endocytosis  
Cbp1p MitochondrialGO:000095GO:003131GO:0003729 mRNA binding;GO:0003723 RNA binding;GO:000  
FG-nucleosideFG-nucleosideGO:000005GO:004461GO:001705 (sce03013)RNA transport  
mitogen-activated MAPKK inGO:000015GO:000595GO:000470 (sce04139)Mitophagy - yeast; (sce04011)MAPK  
ribonucleosideMajor isoformGO:000925GO:000595GO:000470 (sce00480)Glutathione metabolism; (sce00240)l  
Sbe2p Protein rGO:003150GO:000575GO:0003674 molecular\_function  
phosphatidylinositol 3-phosphateRING-typeGO:001655GO:000032GO:0032266 phosphatidylinositol-3-phosphate binding;G

RNA-deper RNA-deper GO:000047 GO:003068 GO:0004004 ATP-dependent RNA helicase activity; GO:000  
 Bsc4p Protein c GO:000815 GO:000557 GO:0003674 molecular\_function  
 Zn(2+) t1 Endoplasm GO:007157 GO:000578 GO:0005385 zinc ion transmembrane transporter activit  
 Add66p Protein i GO:004324 GO:000582 GO:0003674 molecular\_function  
 putative Essential GO:000047 GO:000578 GO:0004004 ATP-dependent RNA helicase activity; GO:000  
 Chz1p Histone c GO:000635 GO:000565 GO:0042393 histone binding; GO:0005515 protein binding  
 None None None None None None  
 seripaupe Cell wall GO:003151 GO:000927 GO:0005199 structural constituent of cell wall; GO:000  
 Erd2p HDEL rec GO:000662 GO:000581 GO:004501 (Human) (hsa05110) Vibrio cholerae infection  
 Cic1p Essential GO:000047 GO:003068 GO:0070628 proteasome binding; GO:0030674 protein bind  
 None None None None None None  
 biotin-- Biotin: a GO:000933 GO:000565 GO:007175 (sce00780) Biotin metabolism; (sce01100) Metab  
 Noc3p Subunit c GO:000625 GO:000565 GO:0003682 chromatin binding; GO:0005488 binding; GO:00  
 Plm2p Putative GO:000697 GO:000079 GO:0003682 chromatin binding; GO:0005488 binding; GO:00  
 None None None None None None  
 Arf famil GTP-bind GO:000702 GO:000578 GO:0005525 GTP binding; GO:0032550 purine ribonucleosi  
 phenylal Mitochon GO:007015 GO:000578 GO:000482 (sce00970) Aminoacyl-tRNA biosynthesis  
 leucine-- Mitochon GO:000642 GO:000578 GO:000482 (sce00970) Aminoacyl-tRNA biosynthesis  
 None None None None None None  
 ribosomal Protein c GO:000641 GO:002262 GO:000375 (sce03010) Ribosome  
 hypotheti Putative GO:000815 GO:000557 GO:0003674 molecular\_function  
 Sds3p Component GO:004371 GO:003369 GO:0004407 histone deacetylase activity; GO:0033558 pr  
 prolifer Prolifer GO:190235 GO:004362 GO:003035 (sce03410) Base excision repair; (sce03430) Mi  
 cAMP-depe cAMP-depe GO:001061 GO:000595 GO:000469 (sce04213) Longevity regulating pathway - mul  
 SUMO-tar Subunit c GO:001692 GO:003376 GO:0004842 ubiquitin-protein transferase activity; GO:  
 hypotheti Putative protein of unknown function; conserved in fungi; identified by expressi  
 serine/tl Serine/tl GO:000711 GO:000562 GO:0004674 protein serine/threonine kinase activity; G  
 CORVET cc Component GO:000705 GO:003326 GO:000367 (sce04138) Autophagy - yeast  
 F0 ATP sy F0-ATP sy GO:001598 GO:000027 GO:004695 (sce00190) Oxidative phosphorylation; (sce011  
 serine/tl Upstream GO:000597 GO:000582 GO:000467 (sce04138) Autophagy - yeast  
 Mub1p MYND dom GO:000651 GO:199031 GO:0046872 metal ion binding; GO:0043169 cation bindin  
 CCR4-NOT Ubiquiti GO:003108 GO:003001 GO:000484 (sce03018) RNA degradation  
 Tma22p Protein c GO:000215 GO:000584 GO:0043024 ribosomal small subunit binding; GO:0003743  
 U2-type c Non-esser GO:004529 GO:000568 GO:000372 (sce03040) Spliceosome  
 condensir Subunit c GO:190334 GO:000079 GO:004239 (sce04111) Cell cycle - yeast  
 TFIIH/NEF5' to 3' GO:004595 GO:000567 GO:004314 (sce03022) Basal transcription factors; (sce0  
 hypotheti Dubious c GO:000815 GO:000557 GO:0003674 molecular\_function  
 Kre28p Subunit c GO:000815 GO:000077 GO:000367 (sce03013) RNA transport  
 hypotheti Protein c GO:007235 GO:000565 GO:0000978 RNA polymerase II proximal promoter sequen  
 histone c Subunit c GO:004396 GO:004669 GO:0004402 histone acetyltransferase activity; GO:0061  
 None None None None None None  
 alpha-1, c Alpha-1, c GO:000645 GO:000015 GO:000005 (sce00514) Other types of O-glycan biosynthes  
 Tom22p Component GO:004504 GO:000574 GO:0008320 protein transmembrane transporter activity  
 transcri Subunit c GO:004275 GO:000012 GO:0001002 RNA polymerase III type 1 promoter sequenc  
 putative Iron-sulf GO:003155 GO:000578 GO:0102521 tRNA-4-demethylwyosine synthase activity; G  
 None None None None None None  
 None None None None None None  
 U2 snRNP U2-snRNP GO:000024 GO:000568 GO:000372 (sce03040) Spliceosome  
 tryptoph Mitochon GO:007015 GO:000578 GO:000482 (sce00970) Aminoacyl-tRNA biosynthesis  
 None None None None None None  
 Ldb16p Protein i GO:003438 GO:003017 GO:0003674 molecular\_function  
 ribosomal Protein c GO:000215 GO:002262 GO:000375 (sce03010) Ribosome  
 ubiquiti Ubiquiti GO:000005 GO:002262 GO:003138 (sce03010) Ribosome  
 cysteine Conserve GO:005165 GO:000582 GO:001978 (sce04136) Autophagy - other; (sce04138) Autopl

Tholp ConservecGO:001697GO:000565GO:0003682 chromatin binding;GO:0003690 double-strand  
 Ldb19p Alpha-arrGO:000205GO:003015GO:0031625 ubiquitin protein ligase binding;GO:004438  
 DNA-bindinTranscripGO:006015GO:000582GO:0000987 proximal promoter sequence-specific DNA bi  
 acylglyceBifunctioGO:001945GO:000574GO:010256(sce00565)Ether lipid metabolism; (sce00564)  
 Add37p Protein cGO:003045GO:000575GO:0003674 molecular\_function  
 hypothetiPutative GO:000815GO:000557GO:0003674 molecular\_function  
 tRNase Z tRNA 3'-cGO:007265GO:000575GO:004275(sce03013)RNA transport  
 homoserirHomoserirGO:000905GO:000557GO:000441(M00018)Threonine biosynthesis, aspartate =>  
 pseudouritRNA:pseiGO:003115GO:000565GO:0009982 pseudouridine synthase activity;GO:0016866  
 Egd1p Subunit lGO:000662GO:000585GO:0051082 unfolded protein binding;GO:0005515 protei  
 None None None None None None  
 RNA-bindinConstitutGO:000002GO:003065GO:0003729 mRNA binding;GO:0003723 RNA binding;GO:000  
 Bbplp Protein rGO:007195GO:000582GO:0005198 structural molecule activity;GO:0003674 mo  
 DNA topoiTopoisomeGO:009704GO:000075GO:000391(Human) (hsa01524)Platinum drug resistance  
 hypothetiNon-esserGO:000815GO:000565GO:0003674 molecular\_function  
 Stp2p TranscripGO:004594GO:000585GO:0000978 RNA polymerase II proximal promoter sequen  
 Slnlp TransmemlGO:000725GO:000585GO:000015(sce04139)Mitophagy - yeast; (sce04011)MAPK ;  
 Rrt8p Protein iGO:003047GO:000561GO:0003674 molecular\_function  
 metal catVacuolar GO:000682GO:000032GO:0015087 cobalt ion transmembrane transporter activ  
 serine/thSer/Thr lGO:000091GO:000581GO:000467(sce04111)Cell cycle - yeast  
 hypothetiPseudogerGO:000815GO:000557GO:0003674 molecular\_function  
 casein kiPalmitoylGO:00181(GO:000032GO:0004674 protein serine/threonine kinase activity;G  
 Nup157p Subunit cGO:003622GO:004461GO:001705(sce03013)RNA transport  
 transcripSubunit cGO:004275GO:000012GO:0001002 RNA polymerase III type 1 promoter sequenc  
 alanine--CytoplasGO:007014GO:000575GO:000481(sce00970)Aminoacyl-tRNA biosynthesis  
 SKI complSki complGO:007047GO:005505GO:000367(sce03018)RNA degradation  
 Apm4p Cargo-birGO:000685GO:003012GO:000551(sce04144)Endocytosis  
 None None None None None None  
 DNA-directRNA polynGO:004275GO:000575GO:000105(sce03020)RNA polymerase; (sce00240)Pyrimidin  
 putative Putative protein of unknown function; green fluorescent protein (GFP)-fusion pro  
 metalloerSUMO-ligGO:199046GO:000032GO:0070140 SUMO-specific isopeptidase activity;GO:007  
 glutamyl-Subunit cGO:007065GO:003095GO:005056(sce00970)Aminoacyl-tRNA biosynthesis; (sce0  
 Set6p SET domaiGO:003225GO:000557GO:0008168 methyltransferase activity;GO:0016741 tran  
 Hir2p Subunit cGO:00307(GO:000041GO:0031491 nucleosome binding;GO:0003714 transcriptio  
 Aep1p Protein rGO:000641GO:000575GO:0045182 translation regulator activity;GO:0003674  
 separase Separase,GO:003285GO:004475GO:000415(sce04111)Cell cycle - yeast; (sce04113)Meio  
 Tel2p Subunit cGO:00070(GO:00702(GO:0042162 telomeric DNA binding;GO:0043565 sequence-  
 Bsplp Adapter rGO:005166GO:003047GO:0030674 protein binding, bridging;GO:0060090 molec  
 Swc7p Protein cGO:000632GO:000081GO:0003674 molecular\_function  
 Whi4p Putative GO:006115GO:000565GO:0035614 snRNA stem-loop binding;GO:0030619 U1 snRN  
 ribosomalProtein cGO:00064(GO:002262GO:001984(sce03010)Ribosome  
 None None None None None None  
 None None None None None None  
 Yra2p Member ofGO:001697GO:000565GO:0003723 RNA binding;GO:0003677 DNA binding;GO:0003  
 Sgmlp Protein cGO:000815GO:003015GO:0003674 molecular\_function  
 hypothetiDubious cGO:000815GO:000557GO:0003674 molecular\_function  
 Egd2p Alpha suGO:000662GO:000585GO:0080025 phosphatidylinositol-3,5-bisphosphate bind  
 tricalbirER proteiGO:00603(GO:003254GO:0008289 lipid binding;GO:0005488 binding;GO:000367  
 Irc6p Clathrin GO:001615GO:000557GO:0030674 protein binding, bridging;GO:0060090 molec  
 mitochondonMitochondonGO:003254GO:000575GO:0070180 large ribosomal subunit rRNA binding;GO:00  
 ditrans,rForms theGO:00194(GO:190442GO:004554(sce00900)Terpenoid backbone biosynthesis; (c  
 hypothetiPutative GO:000815GO:000557GO:0003674 molecular\_function  
 mRNA spliMember ofGO:000034GO:00710(GO:000035(sce03040)Spliceosome  
 peptidylPeptidyl-GO:000041GO:000575GO:0016018 cyclosporin A binding;GO:0003755 peptidyl-

gamma-tulGamma-tulGO:003157GO:0005824 outer plaque of spindle pole body;GO:0005816 spindl  
Imo32p ConserveGO:000815GO:000575GO:0016787 hydrolase activity;GO:0003824 catalytic ac  
Iml3p Outer kirGO:003408GO:000094GO:0003674 molecular\_function  
Tmal6p Protein cGO:000815GO:000565GO:0003674 molecular\_function  
Sef1p Putative GO:003045GO:000565GO:0000981 DNA-binding transcription factor activity,  
tRNA guar tRNAHis GO:009911GO:000565GO:0008193 tRNA guanylyltransferase activity;GO:00081  
Kap120p KaryopherGO:000666GO:000564GO:0008139 nuclear localization sequence binding;GO:0  
hypothetiProtein cGO:000635GO:007268GO:0043022 ribosome binding;GO:0043021 ribonucleoprot  
histone fHistone fGO:003195GO:000078GO:0031492 nucleosomal DNA binding;GO:0031491 nucleos  
palmitoylVesicle nGO:004214GO:003126GO:001640 (sce04130)SNARE interactions in vesicular tra  
Par32p Protein cGO:000815GO:000575GO:0003674 molecular\_function  
Nas6p EvolutioGO:007068GO:000582GO:1904855 proteasome regulatory particle binding;GO:0  
Erb1p ConstitueGO:000046GO:007054GO:0070180 large ribosomal subunit rRNA binding;GO:00  
putative Putative GO:001631GO:000557GO:1990738 pseudouridine 5'-phosphatase activity;GO:0  
ATP-deperSubunit cGO:009911GO:009911GO:000400 (sce03450)Non-homologous end-joining  
acetolactAcetolactGO:000905GO:000594GO:000398 (sce00660)C5-Branched dibasic acid metabolis  
H(+)-trarSubunit aGO:000705GO:000022GO:004696 (sce04145)Phagosome; (sce00190)Oxidative pho  
Pet309p Specific GO:007015GO:003131GO:0045182 translation regulator activity;GO:0003729  
Sir1p Protein iGO:000634GO:000567GO:0043565 sequence-specific DNA binding;GO:0003677 D  
Mud2p Protein iGO:000034GO:000024GO:004515 (sce03040)Spliceosome  
Tof2p Protein iGO:003105GO:000575GO:0000182 rDNA binding;GO:0019211 phosphatase activa  
None None None None None None  
derlin ER membrGO:007084GO:000085GO:005178 (sce04141)Protein processing in endoplasmic  
DNA primSubunit cGO:000626GO:000565GO:000385 (sce03030)DNA replication; (sce00240)Pyrimid  
None None None None None None  
Mcm22p Outer kirGO:003408GO:000077GO:0003674 molecular\_function  
hypothetiPutative GO:000815GO:000557GO:0003674 molecular\_function  
Aualp Protein iGO:000686GO:000557GO:0003674 molecular\_function  
hypothetiProtein cGO:000815GO:000557GO:0017137 Rab GTPase binding;GO:0017016 Ras GTPase b  
succinatSubunit cGO:000612GO:000574GO:000817 (sce)Citrate cycle, second carbon oxidation,  
branched-RegulatorGO:009018GO:000582GO:004745 (sce00010)Glycolysis / Gluconeogenesis; (sce  
Mtc5p Subunit cGO:190426GO:009704GO:000367 (Human) (hsa04150)mTOR signaling pathway  
Sae3p Meiosis-sGO:000077GO:003279GO:0003674 molecular\_function  
Rab familRab familGO:000033GO:000586GO:0003924 GTPase activity;GO:0005525 GTP binding;GO:0  
nucleoticNucleoticGO:001605GO:001602GO:0035529 NADH pyrophosphatase activity;GO:0004528 p  
hypothetiProtein cGO:000815GO:000032GO:0003674 molecular\_function  
hypothetiPutative GO:000815GO:000557GO:0003674 molecular\_function  
None None None None None None  
mannosyliEndoplasmGO:000668GO:003017GO:0030234 enzyme regulator activity;GO:0098772 molec  
hypothetiDubious cGO:000815GO:000557GO:0003674 molecular\_function  
anaphase Subunit cGO:003225GO:000568GO:006165 (sce04120)Ubiquitin mediated proteolysis; (s  
cytochronSubunit lGO:000612GO:007046GO:000412 (sce00190)Oxidative phosphorylation; (sce011  
None None None None None None  
protein cMitochonGO:000662GO:003133GO:0008320 protein transmembrane transporter activity  
Tok1p Outward-iGO:003000GO:000588GO:0022841 potassium ion leak channel activity;GO:000  
Syg1p Plasma meGO:000716GO:000032GO:0003674 molecular\_function  
Rrplp EssentialGO:000636GO:003068GO:0003674 molecular\_function  
None None None None None None  
Pex8p IntraperGO:001655GO:000578GO:0030674 protein binding, bridging;GO:0060090 molec  
Yta7p Protein iGO:200021GO:004246GO:0042393 histone binding;GO:0016887 ATPase activity  
Gir2p Highly-acGO:190385GO:000584GO:0005515 protein binding;GO:0005488 binding;GO:0003

|                  |           |          |          |            |                                               |
|------------------|-----------|----------|----------|------------|-----------------------------------------------|
| None             | None      | None     | None     | None       | None                                          |
| Yvc1p            | Vacuolar  | G0:00975 | G0:19908 | G0:0005227 | calcium activated cation channel activity;    |
| Qdr3p            | Multidrug | G0:00105 | G0:00058 | G0:0015203 | polyamine transmembrane transporter activi    |
| None             | None      | None     | None     | None       | None                                          |
| NEDD8-act        | Protein   | G0:00451 | G0:00056 | G0:00197   | (sce04120)Ubiquitin mediated proteolysis      |
| triglycer        | Triacylg  | G0:00194 | G0:00057 | G0:00048   | (sce)Acylglycerol degradation; (M00098)Acylg  |
| putative Protein |           | G0:00068 | G0:00057 | G0:0008379 | thioredoxin peroxidase activity;G0:0051920    |
| None             | None      | None     | None     | None       | None                                          |
| beta-gluc        | Type II   | G0:00060 | G0:00059 | G0:0015926 | glucosidase activity;G0:0004553 hydrolase     |
| None             | None      | None     | None     | None       | None                                          |
| putative         | Putative  | G0:00196 | G0:00057 | G0:00475   | (sce00640)Propanoate metabolism               |
| Ppqlp            | Protein   | G0:00900 | G0:00056 | G0:00047   | (sce03015)mRNA surveillance pathway; (sce041  |
| Tif3p            | Translati | G0:00017 | G0:00104 | G0:00340   | (sce03013)RNA transport                       |
| Spt21p           | Protein   | G0:00304 | G0:00007 | G0:0003674 | molecular_function                            |
| Ccz1p            | Subunit   | G0:00443 | G0:00325 | G0:00103   | (sce04138)Autophagy - yeast                   |
| epoxide          | Epoxide   | G0:00096 | G0:00055 | G0:0004301 | epoxide hydrolase activity;G0:0016803 ethe    |
| hypotheti        | Protein   | G0:00345 | G0:00057 | G0:0003674 | molecular_function                            |
| ribosomal        | Protein   | G0:00004 | G0:00226 | G0:00037   | (sce03010)Ribosome                            |
| mRNA spli        | Core Sm   | G0:00003 | G0:00056 | G0:00037   | (sce03040)Spliceosome                         |
| hypotheti        | Putative  | G0:00081 | G0:00055 | G0:0003674 | molecular_function                            |
| ribonucl         | Subunit   | G0:00349 | G0:00056 | G0:00421   | (sce03008)Ribosome biogenesis in eukaryotes;  |
| Tda3p            | Putative  | G0:00421 | G0:00057 | G0:0016491 | oxidoreductase activity;G0:0003824 catalyt    |
| copper           | Copper    | G0:00194 | G0:00057 | G0:00165   | (Human) (hsa05014)Amyotrophic lateral scleros |
| bifuncti         | Bifuncti  | G0:00196 | G0:00055 | G0:0047443 | 4-hydroxy-4-methyl-2-oxoglutarate aldolase    |
| None             | None      | None     | None     | None       | None                                          |
| chaperoni        | Alpha su  | G0:00064 | G0:00058 | G0:0051082 | unfolded protein binding;G0:0005524 ATP bi    |
| Hek2p            | RNA bindi | G0:00482 | G0:00007 | G0:0003729 | mRNA binding;G0:0003723 RNA binding;G0:000    |
| Tex1p            | Protein   | G0:00064 | G0:00004 | G0:00037   | (sce03040)Spliceosome; (sce03013)RNA transpo  |
| DNA-direc        | RNA polyn | G0:00427 | G0:00057 | G0:00010   | (sce03020)RNA polymerase; (sce00240)Pyrimidi  |
| holo-[acy        | Phosphop  | G0:00198 | G0:00057 | G0:00088   | (sce00770)Pantothenate and CoA biosynthesis   |
| None             | None      | None     | None     | None       | None                                          |
| putative         | Calcium   | G0:00324 | G0:00057 | G0:0005384 | manganese ion transmembrane transporter ac    |
| cation-tr        | Cadmium   | G0:00705 | G0:00058 | G0:0008551 | cadmium-exporting ATPase activity;G0:00436    |
| Hfilp            | Adaptor   | G0:00439 | G0:00466 | G0:0004402 | histone acetyltransferase activity;G0:0061    |
| Gep5p            | Protein   | G0:00000 | G0:00057 | G0:0003674 | molecular_function                            |
| None             | None      | None     | None     | None       | None                                          |
| Vps74p           | Golgi ph  | G0:00603 | G0:00057 | G0:00702   | (Human) (hsa05202)Transcriptional misregulati |
| None             | None      | None     | None     | None       | None                                          |
| RNA polyn        | Phosphat  | G0:00315 | G0:00058 | G0:00084   | (sce03015)mRNA surveillance pathway           |
| Srd1p            | Protein   | G0:00063 | G0:00056 | G0:0008270 | zinc ion binding;G0:0043565 sequence-speci    |
| origin re        | Subunit   | G0:00062 | G0:00056 | G0:00036   | (sce04111)Cell cycle - yeast; (sce04113)Meio  |
| RuvB fami        | ATP-deper | G0:00004 | G0:00352 | G0:00431   | (Human) (hsa04310)Wnt signaling pathway       |
| None             | None      | None     | None     | None       | None                                          |
| hypotheti        | Putative  | G0:00081 | G0:00055 | G0:0003674 | molecular_function                            |
| threonine        | Threonine | G0:00065 | G0:00058 | G0:00087   | (sce00260)Glycine, serine and threonine metal |
| DNA-bind         | Essential | G0:00458 | G0:00002 | G0:0017025 | TBP-class protein binding;G0:0004386 helic    |
| NEDD8-cor        | Enzyme    | G0:00451 | G0:00055 | G0:00197   | (sce04120)Ubiquitin mediated proteolysis      |
| FG-nucle         | FG-nucle  | G0:00000 | G0:00446 | G0:0000774 | adenyl-nucleotide exchange factor activity    |
| None             | None      | None     | None     | None       | None                                          |
| hypotheti        | Putative  | G0:00081 | G0:00055 | G0:0003674 | molecular_function                            |
| putative         | Protein   | G0:00332 | G0:00003 | G0:0005381 | iron ion transmembrane transporter activit    |
| Rrg1p            | Protein   | G0:00070 | G0:00057 | G0:0003674 | molecular_function                            |
| ubiquinor        | Protein   | G0:19010 | G0:00057 | G0:0008289 | lipid binding;G0:0005488 binding;G0:000367    |
| None             | None      | None     | None     | None       | None                                          |

Nca2p Protein tGO:00090fGO:00057fGO:0003674 molecular\_function  
 HSP70/90 TPR-contGO:00420fGO:00057fGO:0051879 Hsp90 protein binding;GO:0030544 Hsp70 pro  
 H(+)-trarSubunit (GO:00070fGO:00002fGO:00085f(sce04145)Phagosome; (sce00190)Oxidative pho  
 protein-tEssentialGO:00000fGO:00199(GO:0019207 kinase regulator activity;GO:0015631 tubul  
 SCF ubiquiF-box prcGO:00311fGO:00432fGO:00508f(sce04120)Ubiquitin mediated proteolysis; (s  
 triacylgSerine hyGO:00550fGO:00058fGO:0004806 triglyceride lipase activity;GO:0016298 li  
 Rrt7p Putative GO:00081fGO:00160fGO:0003674 molecular\_function  
 ERMES conMitochonGO:19904fGO:00328fGO:00082f(sce04139)Mitophagy - yeast  
 Hua2p CytoplasmGO:00081fGO:00057fGO:0003674 molecular\_function  
 MIND comEssentialGO:00514fGO:00009fGO:0003674 molecular\_function  
 Rec8p Meiosis-fGO:00071fGO:00007fGO:00036f(sce04113)Meiosis - yeast  
 karyopherKaryopherGO:00601fGO:00425fGO:00050f(sce03013)RNA transport  
 ribosomalRibosomalGO:00021fGO:00226fGO:00037f(sce03010)Ribosome  
 hypothetiHelicase-GO:00081fGO:00055fGO:0004386 helicase activity;GO:0017111 nucleoside-tr  
 Tcb3p Cortical GO:00603(GO:00325fGO:0005544 calcium-dependent phospholipid binding;GO:0  
 AMP-activAMP-activGO:20002fGO:00001fGO:00046f(sce04138)Autophagy - yeast; (sce04113)Meios  
 Skt5p ActivatorGO:00342fGO:00001fGO:0008047 enzyme activator activity;GO:0030234 enzym  
 ubiquinorProtein vGO:00067fGO:00057fGO:0003674 molecular\_function  
 Ctf13p Subunit cGO:00009fGO:00315fGO:0019237 centromeric DNA binding;GO:0008301 DNA bin  
 type I HCo-chaperGO:00304fGO:00057fGO:00016f(sce04141)Protein processing in endoplasmic  
 glucose-glycerolGO:00157fGO:00003fGO:0005351 carbohydrate:proton symporter activity;GO:0  
 aspartateCytosolicGO:00192fGO:00057fGO:00040f(sce00360)Phenylalanine metabolism; (sce00350  
 Sgnlp CytoplasmGO:00160fGO:00057fGO:00081f(sce03015)mRNA surveillance pathway  
 MCM DNA lProtein iGO:19024fGO:00711fGO:00171f(sce03030)DNA replication; (sce04111)Cell cy  
 clathrin Clathrin GO:00068fGO:00301fGO:00320f(sce04144)Endocytosis  
 succinateProtein rGO:00061fGO:00057f(Human)GO:0005515 protein binding;GO:0005488 binding;  
 None None None None None None  
 None None None None None None  
 Arp7p ComponentGO:00427fGO:00165fGO:0015616 DNA translocase activity;GO:0008094 DNA-de  
 ubiquitirUbiquitirGO:00991fGO:00991fGO:0004843 thiol-dependent ubiquitin-specific proteas  
 chromatirChromatirGO:00007fGO:00312fGO:0003682 chromatin binding;GO:0003677 DNA binding;G  
 hypothetiProtein vGO:00067fGO:00056fGO:0016491 oxidoreductase activity;GO:0003824 catalyt  
 Mer1p mRNA-binGO:00480fGO:00056fGO:1990446 U1 snRNP binding;GO:0070990 snRNP binding;  
 Mss18p Nuclear cGO:00003fGO:00057fGO:0003674 molecular\_function  
 Thi74p MitochonGO:00081fGO:00003fGO:0003674 molecular\_function  
 Sfc1p MitochonGO:00157fGO:00057fGO:0005469 succinate:fumarate antiporter activity;GO:0  
 ubiquitirUbiquitirGO:00109fGO:00057fGO:0004843 thiol-dependent ubiquitin-specific proteas  
 DNA-directRNA polynGO:00427fGO:00056fGO:0001056 RNA polymerase III activity;GO:0003899 DNA  
 Erp4p Member oGO:00066fGO:00301fGO:0003674 molecular\_function  
 ElongatorSubunit cGO:00020fGO:00335fGO:0000049 tRNA binding;GO:0016887 ATPase activity;GO  
 carnitineMitochonGO:00066fGO:00057fGO:0005476 carnitine:acyl carnitine antiporter activi  
 Mimlp MitochonGO:00450fGO:00313(GO:0003674 molecular\_function  
 pyrrolineDelta l-rGO:00551fGO:00057fGO:00047f(M00015)Proline biosynthesis, glutamate => p  
 None None None None None None  
 Yaf9p Subunit cGO:00063fGO:00352fGO:0005515 protein binding;GO:0005488 binding;GO:0003  
 Bphlp Protein lGO:00315(GO:00003fGO:0003674 molecular\_function  
 Usolp EssentialGO:00482fGO:00125(GO:0008565 protein transporter activity;GO:0005215 tr  
 Kxdlp Subunit cGO:00070fGO:00310fGO:0003674 molecular\_function  
 Mam33p Specific GO:00701fGO:00057fGO:0097177 mitochondrial ribosome binding;GO:0008494  
 None None None None None None  
 ubiquitirFusion prGO:00021(GO:00226fGO:00313f(sce03010)Ribosome  
 mannosyliMannosyliGO:00519fGO:00003fGO:0000030 mannosyltransferase activity;GO:0016758 tr  
 Rfa2p Subunit cGO:20000(GO:00056fGO:00985f(sce03440)Homologous recombination; (sce03430  
 RSC suburComponentGO:00421fGO:00165fGO:0015616 DNA translocase activity;GO:0008094 DNA-de

hypotheticalPutative GO:000815GO:000575GO:0003674 molecular\_function  
 Erp6p Member of GO:000705GO:003015GO:0003674 molecular\_function  
 actin Actin; s GO:000711GO:000014GO:000440 (sce04145)Phagosome  
 1,3-beta-Catalytic GO:003047GO:000014GO:000384 (sce00500)Starch and sucrose metabolism; (sce  
 Rgd2p GTPase-act GO:004354GO:000095GO:0005096 GTPase activator activity;GO:0030695 GTPas  
 DNA-(apurClass II GO:000625GO:000565GO:000831 (sce03410)Base excision repair  
 alpha-1,6 (Alpha-1,6 GO:000605GO:000015GO:000000 (sce)N-glycan biosynthesis, high-mannose type  
 Thp1p Nuclear p GO:007110GO:007035GO:0003690 double-stranded DNA binding;GO:0044877 pro  
 tRNA (guatRNA met GO:000294GO:000565GO:0004809 tRNA (guanine-N2-)-methyltransferase activ  
 coenzyme Mitochond GO:003534GO:000574GO:0015228 coenzyme A transmembrane transporter activ  
 Vma21p Integral GO:007007GO:001250GO:0003674 molecular\_function  
 None None None None None None  
 hypotheticalProtein c GO:000815GO:000565GO:0003674 molecular\_function  
 ribosomalRibosomal GO:000215GO:002262GO:000375 (sce03010)Ribosome  
 None None None None None None  
 GPI-anchCell wall GO:003150GO:000927GO:0005199 structural constituent of cell wall;GO:000  
 hypotheticalPutative GO:000815GO:003015GO:0003674 molecular\_function  
 H(+)-trarSubunit I GO:000705GO:001647GO:004696 (sce04145)Phagosome; (sce00190)Oxidative pho  
 WD-repeatSubunit c GO:003472GO:004818GO:004280 (sce03015)mRNA surveillance pathway  
 Bop3p Protein c GO:007140GO:000565GO:0003674 molecular\_function  
 kexin KEKexin, a GO:000732GO:003015GO:0004252 serine-type endopeptidase activity;GO:0008  
 mitochondMitochond GO:003254GO:000575GO:000375 (sce03010)Ribosome  
 Taf8p TFIID sub GO:005112GO:000565GO:001625 (sce03022)Basal transcription factors  
 None None None None None None  
 Ste18p G protei GO:000075GO:012017GO:003168 (sce04011)MAPK signaling pathway - yeast  
 hypotheticalPutative protein of unknown function; identified by expression profiling and mas  
 Pcl10p Pho85p cy GO:004571GO:000030GO:0016538 cyclin-dependent protein serine/threonine  
 None None None None None None  
 centrin Calcium-b GO:003047GO:000582GO:0005509 calcium ion binding;GO:0046872 metal ion b  
 hypotheticalDubious c GO:000815GO:001602GO:0003674 molecular\_function  
 cohesin sSubunit c GO:000705GO:003495GO:000368 (sce04111)Cell cycle - yeast; (sce04113)Meio  
 uroporphS-adenosy GO:001935GO:000565GO:000485 (sce00860)Porphyrin and chlorophyll metaboli  
 putative Putative GO:000815GO:000557GO:004386 (sce00360)Phenylalanine metabolism; (sce00380  
 Cbc2p Small sub GO:000015GO:000584GO:000035 (sce03015)mRNA surveillance pathway; (sce030  
 hypotheticalPutative GO:190235GO:000032GO:0008271 secondary active sulfate transmembrane tra  
 hypotheticalPutative GO:000815GO:000575GO:0003674 molecular\_function  
 None None None None None None  
 dolichyl-Subunit c GO:001827GO:000825GO:000457 (M00072)N-glycosylation by oligosaccharyltra  
 None None None None None None  
 ubiquinorCoenzyme GO:000674GO:000574GO:0048039 ubiquinone binding;GO:0048038 quinone bind  
 None None None None None None  
 Sfl1p Transcrip GO:190046GO:000565GO:0001103 RNA polymerase II repressing transcription  
 Dec1p Subunit c GO:003575GO:003135GO:0003689 DNA clamp loader activity;GO:0033170 prote  
 Tlg2p Syntaxin- GO:000667GO:003130GO:000548 (sce04130)SNARE interactions in vesicular tra  
 Nan1p U3 snoRN GO:004594GO:003445GO:003451 (sce03008)Ribosome biogenesis in eukaryotes  
 translatieIF3c sub GO:000641GO:004361GO:003136 (sce03013)RNA transport  
 UTP glucUDP-gluc GO:000607GO:001045GO:000398 (M00549)Nucleotide sugar biosynthesis, gluco  
 ubiquitinrComponent GO:004572GO:003465GO:0004842 ubiquitin-protein transferase activity;GO:  
 mini-chrcComponent GO:000626GO:007116GO:199016 (sce03030)DNA replication; (sce04111)Cell cy  
 SAM compComponent GO:004504GO:000140GO:0003674 molecular\_function  
 histone cNAD(+)-de GO:199061GO:000572GO:004512 (sce00760)Nicotinate and nicotinamide metabo  
 Nsglp Protein i GO:001612GO:003435GO:0051082 unfolded protein binding;GO:0005515 protei  
 Hsp70 fanMitochond GO:000688GO:000575GO:0044183 protein binding involved in protein foldin  
 putative Deubiquit GO:001657GO:000574GO:0004843 thiol-dependent ubiquitin-specific proteas

Rrp5p RNA binding;GO:000046;GO:003068;GO:0034512 box C/D snoRNA binding;GO:0042134 rRNA processing

Cdc73p Component;GO:200125;GO:001659;GO:1990269 RNA polymerase II C-terminal domain phosphatase

Pet8p S-adenosylmethionine synthase;GO:190196;GO:000574;GO:0000095 S-adenosyl-L-methionine transmembrane transporter

Rab family Rab family;GO:003445;GO:000595;GO:000392 (sce04144)Endocytosis

Ctp1p Mitochondrial;GO:000684;GO:000574;GO:0005371 tricarboxylate secondary active transmembrane transporter

Ndl1p Homolog of;GO:003047;GO:000588;GO:0051010 microtubule plus-end binding;GO:0008017 microtubule plus-end binding

phosphatidylinositol 3-kinase;GO:190535;GO:003195;GO:000445 (sce04136)Autophagy - other; (sce04213)Longevity

dolichyl-Epsilon synthase;GO:000645;GO:000825;GO:000457 (M00072)N-glycosylation by oligosaccharyl transferase

hypothetical protein;GO:000815;GO:000582;GO:0003674 molecular\_function

None None None None None None

Rrt15p Putative;GO:000815;GO:000557;GO:0003674 molecular\_function

Pho81p Cyclin-dependent kinase;GO:004575;GO:000582;GO:000486 (sce04111)Cell cycle - yeast

hypothetical protein;GO:000815;GO:000557;GO:0003674 molecular\_function

None None None None None None

Efm4p Lysine methyltransferase;GO:001802;GO:000575;GO:0016279 protein-lysine N-methyltransferase activity

serine/threonine kinase;GO:000725;GO:000575;GO:0004683 calmodulin-dependent protein kinase activity

hypothetical protein;GO:190266;GO:003136;GO:0003674 molecular\_function

DNA-directed DNA polymerase;GO:000933;GO:000575;GO:0000182 rDNA binding;GO:0003887 DNA-directed DNA polymerase

None None None None None None

ribosomal;Ribosomal;GO:000002;GO:002262;GO:000375 (sce03010)Ribosome

snoRNP core;Essential;GO:000015;GO:003142;GO:003051 (sce03008)Ribosome biogenesis in eukaryotes

hypothetical protein;GO:000815;GO:000557;GO:0005524 ATP binding;GO:0032559 adenylyl ribonucleotidyl transferase

Trs33p Core component;GO:003445;GO:199007;GO:0003674 molecular\_function

FG-nucleoporin;FG-nucleoporin;GO:003195;GO:004461;GO:0017056 structural constituent of nuclear pore;GO:0005887 nuclear pore complex

signal peptidase;GO:000645;GO:000575;GO:000825 (sce03060)Protein export

thioredoxin;Mitochondrial;GO:009888;GO:000575;GO:000837 (Human) (hsa01100)Metabolic pathways

Gef1p Voltage-gated chloride channel;GO:000687;GO:000575;GO:0005247 voltage-gated chloride channel activity;GO:0005247

Msc3p Protein;GO:000715;GO:000588;GO:0003674 molecular\_function

coatamer Alpha subunit;GO:000688;GO:003012;GO:0043130 ubiquitin binding;GO:0032182 ubiquitin-like protein binding

None None None None None None

mitochondrial;Mitochondrial;GO:003254;GO:000575;GO:0003735 structural constituent of ribosome;GO:0005887 nuclear pore complex

None None None None None None

low-affinity;Low-affinity;GO:001567;GO:000032;GO:0005375 copper ion transmembrane transporter activity

Cin10p Putative;GO:003421;GO:000032;GO:0005351 carbohydrate:proton symporter activity;GO:0005351

None None None None None None

Tos2p Protein;GO:190241;GO:003316;GO:0003674 molecular\_function

putative;Putative;GO:000005;GO:003068;GO:199027 (sce03008)Ribosome biogenesis in eukaryotes

ribosomal;Ribosomal;GO:190266;GO:002262;GO:000375 (sce03010)Ribosome

cofilin Cofilin;GO:004306;GO:003047;GO:005101 (Human) (hsa05133)Pertussis; (hsa04666)Fc gamma receptor

SNAP receptor;Vesicle;GO:000688;GO:003068;GO:000548 (sce04130)SNARE interactions in vesicular transport

FG-nucleoporin;FG-nucleoporin;GO:003622;GO:004461;GO:001705 (sce03013)RNA transport

None None None None None None

U4/U6-U5 Component;GO:000035;GO:004654;GO:003062 (sce03040)Spliceosome

Mss2p Peripheral;GO:003297;GO:003131;GO:0003674 molecular\_function

phosphopantetheine;Subunit;GO:001595;GO:199014;GO:000465 (sce)Coenzyme A biosynthesis, pantothenate = pantoic acid

ribosomal;Protein;GO:000645;GO:002262;GO:000375 (sce03010)Ribosome

hypothetical protein;GO:000815;GO:000575;GO:0047429 nucleoside-triphosphate diphosphatase activity

Ccw12p Cell wall;GO:000075;GO:000595;GO:0005199 structural constituent of cell wall;GO:0005199

Pex15p Tail-anchored;GO:001655;GO:000577;GO:0043495 protein membrane anchor;GO:0005515 protein membrane anchor

mitochondrial;Mitochondrial;GO:001046;GO:000575;GO:0030414 peptidase inhibitor activity;GO:0061134 peptidase inhibitor activity

alkaline-Cys2His2;GO:001097;GO:000565;GO:0001227 DNA-binding transcription repressor activity

tRNA (carbamoyl) methyltransferase;GO:000205;GO:000565;GO:0016300 tRNA (uracil) methyltransferase activity;GO:000565

putative MAPKK in;GO:000015;GO:000595;GO:000476 (sce04139)Mitophagy - yeast; (sce04011)MAPK signaling

hypothetical protein;Putative protein of unknown function



|               |                     |           |           |                      |                                                    |
|---------------|---------------------|-----------|-----------|----------------------|----------------------------------------------------|
| None          | None                | None      | None      | None                 | None                                               |
| None          | None                | None      | None      | None                 | None                                               |
| None          | None                | None      | None      | None                 | None                                               |
| None          | None                | None      | None      | None                 | None                                               |
| ribosome      | Protein             | GO:190481 | GO:003068 | GO:199088 (sce03008) | Ribosome biogenesis in eukaryotes                  |
| tRNA          | (cytS-adenosyl)     | GO:000212 | GO:000575 | GO:0016428           | tRNA (cytosine-5-)-methyltransferase activity      |
| casein        | kinase              | GO:000755 | GO:003445 | GO:000467 (sce04139) | Mitophagy - yeast; (sce03008)                      |
| Nkp2p         | Central             | GO:005132 | GO:003151 | GO:0003674           | molecular_function                                 |
| FG-nucleic    | FG-nucleic          | GO:000000 | GO:004461 | GO:0008139           | nuclear localization sequence binding; GO:0008139  |
| ribosomal     | Ribosomal           | GO:000218 | GO:002262 | GO:007018 (sce03010) | Ribosome                                           |
| phosphoryl    | Catalytic           | GO:200015 | GO:000078 | GO:000472 (sce04136) | Autophagy - other; (sce03015)                      |
| hypothetical  | Putative            | GO:009050 | GO:001602 | GO:0004521           | endoribonuclease activity; GO:0004540              |
| Sap4p         | Protein             | GO:000000 | GO:000575 | GO:0004722           | protein serine/threonine phosphatase activity      |
| U5 snRNP      | GTPase              | GO:000038 | GO:004654 | GO:003062 (sce03040) | Spliceosome                                        |
| Elongator     | Subunit             | GO:000292 | GO:003358 | GO:0004402           | histone acetyltransferase activity; GO:006110      |
| citrate       | Dual specific       | GO:001962 | GO:000575 | GO:005044 (M00010)   | Citrate cycle, first carbon oxidation              |
| hypothetical  | Protein             | GO:000815 | GO:000032 | GO:0019825           | oxygen binding; GO:0020037                         |
| Efr3p         | Protein             | GO:007265 | GO:000575 | GO:0003674           | molecular_function                                 |
| phospholipid  | Phospholipid        | GO:000078 | GO:000562 | GO:007029 (sce00565) | Ether lipid metabolism; (sce00564)                 |
| Caf20p        | Phosphoryl          | GO:001060 | GO:000584 | GO:0003743           | translation initiation factor activity; GO:0003743 |
| hypothetical  | Putative            | GO:000815 | GO:000557 | GO:0003674           | molecular_function                                 |
| None          | None                | None      | None      | None                 | None                                               |
| None          | None                | None      | None      | None                 | None                                               |
| Acf2p         | Intracellular       | GO:003005 | GO:000998 | GO:0052862           | glucan endo-1,4-beta-glucanase activity, C         |
| Pcf11p        | mRNA 3'             | GO:009878 | GO:000584 | GO:000099 (sce03015) | mRNA surveillance pathway                          |
| ribosomal     | Ribosomal           | GO:004227 | GO:002262 | GO:000375 (sce03010) | Ribosome                                           |
| AAA family    | Essential           | GO:003195 | GO:000565 | GO:000368 (sce04111) | Cell cycle - yeast; (sce04113)                     |
| Rrn10p        | Protein             | GO:004275 | GO:000050 | GO:0001165           | RNA polymerase I upstream control element          |
| None          | None                | None      | None      | None                 | None                                               |
| dolichyl-     | Protein             | GO:007171 | GO:009758 | GO:000416 (sce00515) | Mannose type O-glycan biosynthesis                 |
| phosphatidyl  | Protein             | GO:000078 | GO:000595 | GO:001617 (sce04011) | MAPK signaling pathway - yeast                     |
| ERMES complex | Outer mitochondrial | GO:005505 | GO:003286 | GO:000392 (Human)    | (hsa04137) Mitophagy - animal                      |
| Vt1p          | Multivesicular      | GO:003246 | GO:000577 | GO:000167 (sce04144) | Endocytosis                                        |
| Flr1p         | Plasma membrane     | GO:001590 | GO:000588 | GO:0015244           | fluconazole transmembrane transporter activity     |
| putative      | Putative            | GO:005511 | GO:000575 | GO:001858 (sce00910) | Nitrogen metabolism                                |
| hypothetical  | Putative            | GO:000815 | GO:000578 | GO:0003674           | molecular_function                                 |
| hypothetical  | Putative            | GO:000815 | GO:001602 | GO:0003674           | molecular_function                                 |
| putative      | Phospholipid        | GO:004535 | GO:003015 | GO:0015662           | ATPase activity, coupled to transmembrane          |
| Ecm33p        | GPI-anchored        | GO:003150 | GO:000927 | GO:0003674           | molecular_function                                 |
| None          | None                | None      | None      | None                 | None                                               |
| mRNA splicing | RNA binding         | GO:000038 | GO:000568 | GO:000038 (sce03040) | Spliceosome                                        |
| Arr3p         | Plasma membrane     | GO:001565 | GO:000588 | GO:0015104           | antimonite transmembrane transporter activity      |
| TFIIH/NEF     | Subunit             | GO:007081 | GO:000567 | GO:000835 (sce03022) | Basal transcription factors; (sce03022)            |
| Ecm8p         | Non-essential       | GO:007155 | GO:000557 | GO:0003674           | molecular_function                                 |
| Rab geranyl   | Beta subunit        | GO:001834 | GO:000596 | GO:0004663           | Rab geranylgeranyltransferase activity; GO:0004663 |
| FG-nucleic    | FG-nucleic          | GO:003195 | GO:004461 | GO:000815 (sce03013) | RNA transport                                      |
| None          | None                | None      | None      | None                 | None                                               |
| Utp8p         | Nucleolar           | GO:000640 | GO:003445 | GO:000000 (sce03008) | Ribosome biogenesis in eukaryotes                  |
| Nbl1p         | Subunit             | GO:000702 | GO:003215 | GO:0030674           | protein binding, bridging; GO:0060090              |
| Krl1p         | Essential           | GO:000044 | GO:003068 | GO:0003674           | molecular_function                                 |
| ribosomal     | Ribosomal           | GO:000218 | GO:002262 | GO:000375 (sce03010) | Ribosome                                           |
| putative      | Putative            | GO:003225 | GO:000565 | GO:0008168           | methyltransferase activity; GO:0016741             |
| seri          | paucipolysaccharide | GO:003150 | GO:000927 | GO:0005199           | structural constituent of cell wall; GO:0005199    |
| Rho family    | GTP-binding         | GO:190335 | GO:000014 | GO:003168 (sce04144) | Endocytosis; (sce04011)                            |
|               |                     |           |           |                      | MAPK signaling pathway                             |

ATP-deper Subunit cGO:00075fGO:00435fGO:00700f (sce03450)Non-homologous end-joining  
 translatiTranslatiGO:00459(GO:00226fGO:0003746 translation elongation factor activity;GO:  
 Ist2p Cortical GO:00603(GO:00331(GO:0008289 lipid binding;GO:0005488 binding;GO:000367  
 putative Putative GO:00550fGO:00003fGO:00426f (Human) (hsa01523)Antifolate resistance; (hsa  
 NADH/NAD ATP-NADH GO:00067fGO:00056fGO:00427f (sce00760)Nicotinate and nicotinamide metabo  
 Nud1p ComponentGO:00000fGO:00058fGO:00199f (sce04392)Hippo signaling pathway -multiple  
 hypothetiPutative GO:00081fGO:00057fGO:0003674 molecular\_function  
 Trx3p MitochonGO:00066fGO:00057fGO:00150f (Human) (hsa05418)Fluid shear stress and athe  
 Nam8p RNA bindiGO:00480fGO:00056fGO:0003729 mRNA binding;GO:0003723 RNA binding;GO:000  
 SAM complComponentGO:00450fGO:00014(GO:0008320 protein transmembrane transporter activity  
 peptide cSubunit cGO:00616(GO:00314fGO:1990190 peptide-glutamate-N-acetyltransferase acti  
 FG-nuclecFG-nuclecGO:00319fGO:00446fGO:0017056 structural constituent of nuclear pore;GO:  
 Bub2p Mitotic cGO:19025fGO:19903fGO:00171f (sce04111)Cell cycle - yeast  
 E2 ubiquiUbiquitirGO:00109fGO:00313fGO:0061631 ubiquitin conjugating enzyme activity;GO:0  
 None None None None None None  
 serine/thConserveGO:20011fGO:00335fGO:00047f (sce03008)Ribosome biogenesis in eukaryotes  
 DNA-directDNA polynGO:00709fGO:00358fGO:0003887 DNA-directed DNA polymerase activity;GO:00  
 Lialp DeoxyhypGO:00086fGO:00056fGO:0019135 deoxyhypusine monooxygenase activity;GO:00  
 hypothetiProtein cGO:00159fGO:00055fGO:0003674 molecular\_function  
 histone nHistone nGO:00714fGO:00007fGO:00469f (sce00310)Lysine degradation  
 uridine gHigh affiGO:00158fGO:00003fGO:0015213 uridine transmembrane transporter activity  
 Mam1p MonopolirGO:00107fGO:00335fGO:00036f (sce04113)Meiosis - yeast  
 Gim5p Subunit cGO:00329fGO:00162fGO:0051082 unfolded protein binding;GO:0015631 tubuli  
 None None None None None None  
 exosome cExosome cGO:00710fGO:00001fGO:00001f (sce03018)RNA degradation  
 ribosome Protein tGO:00709fGO:19905fGO:00045f (sce03015)mRNA surveillance pathway  
 actin-relEssentialGO:00304fGO:00304fGO:00168f (sce04138)Autophagy - yeast  
 carbonyl NADPH-deGO:00551fGO:00056fGO:0004090 carbonyl reductase (NADPH) activity;GO:001  
 Iba57p Protein iGO:01060fGO:00057fGO:0016740 transferase activity;GO:0003824 catalytic  
 tyrosine-CytoplasGO:00064fGO:00104fGO:00048f (sce00970)Aminoacyl-tRNA biosynthesis  
 hypothetiPutative GO:00081fGO:00055fGO:0003674 molecular\_function  
 Nmd2p Protein iGO:00704fGO:00351fGO:00037f (sce03015)mRNA surveillance pathway; (sce030  
 septin SFSporulatiGO:00321fGO:00056fGO:0032947 protein-containing complex scaffold activi  
 Vellp Protein cGO:00081fGO:00057fGO:0003674 molecular\_function  
 putative Putative GO:00193fGO:00056fGO:00039f (sce00450)Selenocompound metabolism; (sce009  
 Pga2p EssentialGO:00150fGO:00319fGO:0003674 molecular\_function  
 Avo2p ComponentGO:00309fGO:00057fGO:0003674 molecular\_function  
 bifuncticBifuncticGO:00194fGO:00058fGO:00716f (sce)Acylglycerol degradation; (M00098)Acylg  
 Ahtlp Dubious cGO:00081fGO:00055fGO:0003674 molecular\_function  
 transcripTranscripGO:00004fGO:00058fGO:00043f (sce)Nucleotide sugar biosynthesis, galactos  
 Rtt107p Protein iGO:19906fGO:00353fGO:0003674 molecular\_function  
 serine/thSerine/thGO:19029fGO:00001fGO:00046f (sce04138)Autophagy - yeast  
 Pci8p Possible GO:00003fGO:00081fGO:0003674 molecular\_function  
 frequenirN-myristcGO:00431fGO:00331(GO:0008047 enzyme activator activity;GO:0005509 calci  
 alpha/betProtein cGO:00359fGO:00057fGO:0004623 phospholipase A2 activity;GO:0004620 phosp  
 TRAPP suCore compGO:00068fGO:19900fGO:0017112 Rab guanyl-nucleotide exchange factor acti  
 hypothetiProtein cGO:00081fGO:00058fGO:0003674 molecular\_function  
 ATP-deperRNA-deperGO:00003fGO:00465fGO:00040f (sce03040)Spliceosome  
 DNA-directCatalyticGO:00431fGO:00436fGO:00082f (sce03410)Base excision repair; (sce03440)Ho  
 Rcnlp Protein iGO:00708fGO:00057fGO:0008597 calcium-dependent protein serine/threonine  
 Ahklp Scaffold GO:00072fGO:00055fGO:0005078 MAP-kinase scaffold activity;GO:0035591 si  
 Imllp GTPase-acGO:20007fGO:00970fGO:0005096 GTPase activator activity;GO:0030695 GTPas  
 transportIntegral GO:00482fGO:00301fGO:0003674 molecular\_function  
 hypothetiPutative GO:00158fGO:00160fGO:00085f (Human) (hsa00604)Glycosphingolipid biosynthe

|           |           |                     |                     |                                            |                                              |
|-----------|-----------|---------------------|---------------------|--------------------------------------------|----------------------------------------------|
| Hif1p     | Non-esser | G0:000634           | G0:000012           | G0:0042393                                 | histone binding;G0:0005515 protein binding   |
| chaperon  | Subunit   | cG0:000645          | G0:000585           | G0:0051082                                 | unfolded protein binding;G0:0005524 ATP bi   |
| nucleopor | Transmem  | tG0:003105          | G0:00313(G0:0043022 | ribosome binding;G0:0043021 ribonucleoprot |                                              |
| Tim54p    | Component | tG0:004505          | G0:004272           | G0:0008320                                 | protein transmembrane transporter activity   |
| cystathic | Cystathic | G0:001934           | G0:000565           | G0:004454                                  | (sce)Cysteine biosynthesis, homocysteine + s |
| Rec114p   | Protein   | iG0:004215          | G0:000079           | G0:0003674                                 | molecular_function                           |
| None      | None      | None                | None                | None                                       | None                                         |
| DNA-deper | DNA-deper | G0:004514           | G0:000565           | G0:001561                                  | (sce03440)Homologous recombination           |
| None      | None      | None                | None                | None                                       | None                                         |
| None      | None      | None                | None                | None                                       | None                                         |
| phospholi | Protein   | iG0:00603(G0:000078 | G0:0003674          | molecular_function                         |                                              |
| Lam1p     | Putative  | G0:004575           | G0:003254           | G0:0016538                                 | cyclin-dependent protein serine/threonine    |
| hypotheti | Putative  | G0:000815           | G0:000557           | G0:0003674                                 | molecular_function                           |
| None      | None      | None                | None                | None                                       | None                                         |
| None      | None      | None                | None                | None                                       | None                                         |
| None      | None      | None                | None                | None                                       | None                                         |
| None      | None      | None                | None                | None                                       | None                                         |
| monothiol | Glutathic | G0:001622           | G0:000575           | G0:0015038                                 | glutathione disulfide oxidoreductase activ   |
| 2',3'-cyc | Cyclic n  | G0:000915           | G0:003015           | G0:0004113                                 | 2',3'-cyclic-nucleotide 3'-phosphodiester    |
| organic   | Secondary | G0:190495           | G0:000032           | G0:0015187                                 | glycine transmembrane transporter activity   |
| hypotheti | Putative  | G0:000815           | G0:000557           | G0:0003674                                 | molecular_function                           |
| None      | None      | None                | None                | None                                       | None                                         |
| ubiquitin | C3HC4-ty  | G0:001655           | G0:000577           | G0:000802                                  | (sce04146)Peroxisome                         |
| Tpo5p     | Protein   | iG0:190204          | G0:000015           | G0:0015203                                 | polyamine transmembrane transporter activi   |
| Eaf3p     | Component | tG0:006015          | G0:0032221          | Rpd3S complex;G0:0035267                   | NuA4 histone acetyltransfe                   |













)Propanoate metabolism; (sce00280)Valine, leucine and isoleucine degradation

olism; (sce00680)Methane metabolism; (sce01200)Carbon metabolism

0043022 ribosome binding;GO:0019843 rRNA binding  
binding;GO:0030246 carbohydrate binding  
binding;GO:0030246 carbohydrate binding  
vity;GO:0051184 cofactor transmembrane transporter activity;GO:0022857 transmembrane tran  
protein binding;GO:0005488 binding

52 alpha-glucoside:proton symporter activity;GO:0015574 trehalose transmembrane transport  
ter activity;GO:0015343 siderophore transmembrane transporter activity;GO:0051184 cofacto  
nitric oxide dioxygenase activity;GO:0016708 oxidoreductase activity, acting on paired d  
protein binding;GO:0005488 binding

ctose-6P; (sce)Gluconeogenesis, oxaloacetate => fructose-6P; (sce00020)Citrate cycle (TCA

mide transmembrane transporter activity;GO:0015234 thiamine transmembrane transporter act

arch and sucrose metabolism; (sce01100)Metabolic pathways

0)Metabolic pathways  
0:0016413 O-acetyltransferase activity;GO:0008374 O-acyltransferase activity  
RNA polymerase II-specific;GO:0008270 zinc ion binding;GO:0046914 transition metal ion b  
, nitrogenous group as acceptor;GO:0016651 oxidoreductase activity, acting on NAD(P)H;GO:  
rsions; (sce01100)Metabolic pathways

ansmembrane transporter activity;GO:0022838 substrate-specific channel activity

0043022 ribosome binding;GO:0019843 rRNA binding  
ity;GO:0046915 transition metal ion transmembrane transporter activity;GO:0046873 metal i

70)Cysteine and methionine metabolism; (sce01230)Biosynthesis of amino acids  
ty acid degradation; (sce00010)Glycolysis / Gluconeogenesis

carbon lyase activity;GO:0016829 lyase activity  
binding;GO:0033218 amide binding  
phosphatase activity;GO:0016462 pyrophosphatase activity

RNA polymerase II-specific;GO:0008270 zinc ion binding;GO:0046914 transition metal ion binding  
catalytic mechanism;GO:0036442 proton-exporting ATPase activity;GO:0015662 ATPase activity,  
0:0004672 protein kinase activity;GO:0016773 phosphotransferase activity, alcohol group a  
multiple species  
ity;GO:0005436 sodium:phosphate symporter activity;GO:0005315 inorganic phosphate transme  
ty acid degradation; (sce00680)Methane metabolism

y;GO:0004322 ferroxidase activity;GO:0016724 oxidoreductase activity, oxidizing metal ion  
abolic pathways  
g;GO:0003723 RNA binding  
050308 sugar-phosphatase activity;GO:0019203 carbohydrate phosphatase activity  
phase, glucose 6P => ribulose 5P; (sce)Pentose phosphate pathway, oxidative phase, gluco

binding;GO:0030246 carbohydrate binding  
GO:0015151 alpha-glucoside transmembrane transporter activity;GO:0042947 glucoside transmembrane  
specific channel activity;GO:0015267 channel activity

arch and sucrose metabolism; (sce01100)Metabolic pathways

=> GDP,GTP; (M00050)Guanine ribonucleotide biosynthesis IMP => GDP,GTP; (sce00230)Purine

reticulum  
(sce01100)Metabolic pathways  
;GO:0015101 organic cation transmembrane transporter activity;GO:0008519 ammonium transme

reticulum  
GO:0000293 ferric-chelate reductase activity;GO:0016723 oxidoreductase activity, oxidizin

gocalciferol biosynthesis; (sce00100)Steroid biosynthesis  
0004026 alcohol O-acetyltransferase activity;GO:0034318 alcohol O-acyltransferase activit  
specific channel activity;GO:0015267 channel activity

processing in endoplasmic reticulum

5198 structural molecule activity;GO:0003674 molecular\_function  
se => UDP-glucose; (sce)Nucleotide sugar biosynthesis, glucose => UDP-glucose; (sce00051)l  
arch and sucrose metabolism; (sce01100)Metabolic pathways

ests a role in lipid metabolism; expression pattern suggests a role in respiratory growth

ivity;GO:0015193 L-proline transmembrane transporter activity;GO:0015175 neutral amino ac

GO:0008289 lipid binding

tive phase, fructose 6P => ribose 5P; (sce)Pentose phosphate pathway, non-oxidative phase;  
movement of substances;GO:0043492 ATPase activity, coupled to movement of substances;GO:0043492  
46 carbon-sulfur lyase activity;GO:0030170 pyridoxal phosphate binding

020037 heme binding;GO:0016705 oxidoreductase activity, acting on paired donors, with inc

transferase activity;GO:0008172 S-methyltransferase activity;GO:0008757 S-adenosylmethionine  
transmembrane transporter activity;GO:0022838 substrate-specific channel activity

4 molecular\_function

ollic pathways

movement of substances;GO:0043492 ATPase activity, coupled to movement of substances;GO:0043492  
ular adaptor activity;GO:0005515 protein binding

transmembrane transporter activity;GO:0022838 substrate-specific channel activity

5198 structural molecule activity;GO:0003674 molecular\_function

er activity;GO:0015343 siderophore transmembrane transporter activity;GO:0051184 cofactor

384 manganese ion transmembrane transporter activity;GO:0005315 inorganic phosphate trans

70)Cysteine and methionine metabolism; (sce01230)Biosynthesis of amino acids

specific channel activity;GO:0015267 channel activity

alanine, aspartate and glutamate metabolism; (sce01230)Biosynthesis of amino acids

binding;GO:0046906 tetrapyrrole binding

esis; (sce01100)Metabolic pathways

thymine (+ PRPP) => UMP; (M00051)Uridine monophosphate biosynthesis, glutamine (+ PRPP) =>

0034323 O-butanoyltransferase activity;GO:0004026 alcohol O-acetyltransferase activity

cholesterol biosynthesis; (sce00100)Steroid biosynthesis

0032550 purine ribonucleoside binding

porter activity;GO:0015196 L-tryptophan transmembrane transporter activity;GO:0015173 ar

ar\_function

e activity;GO:0017111 nucleoside-triphosphatase activity

histamine metabolism; (sce01100)Metabolic pathways

three-carbon compounds; (sce)Glycolysis, core module involving three-carbon compounds; (M00051)  
00)Metabolic pathways

s, PE => PC; (sce)Phosphatidylcholine (PC) biosynthesis, PE => PC; (sce00564)Glycerophospholipid

-specific DNA binding;GO:0001158 enhancer sequence-specific DNA binding;GO:0035326 enhancer

;GO:0016616 oxidoreductase activity, acting on the CH-OH group of donors, NAD or NADP as

ator activity;GO:0030695 GTPase regulator activity

lyxylate and dicarboxylate metabolism; (sce04213)Longevity regulating pathway - multiple

pathway; (M00095)C5 isoprenoid biosynthesis, mevalonate pathway; (sce00900)Terpenoid backbone

ic activity;GO:0003674 molecular\_function

0)Tyrosine metabolism; (sce00400)Phenylalanine, tyrosine and tryptophan biosynthesis

5198 structural molecule activity;GO:0003674 molecular\_function

hionine salvage pathway; (sce00270)Cysteine and methionine metabolism  
de binding;GO:0030554 adenylyl nucleotide binding

ce-specific DNA binding;GO:0000987 proximal promoter sequence-specific DNA binding;GO:000  
e bodies; (sce)C5 isoprenoid biosynthesis, mevalonate pathway; (sce00650)Butanoate metabo  
lic activity;GO:0003674 molecular\_function

vity;GO:0051184 cofactor transmembrane transporter activity;GO:0022857 transmembrane tran  
proteins localize to the cytosol; conserved among *Saccharomyces sensu stricto* species

activity;GO:0015171 amino acid transmembrane transporter activity;GO:0046943 carboxylic  
peroxiredoxin activity;GO:0004601 peroxidase activity

ty acid degradation; (sce00010)Glycolysis / Gluconeogenesis  
ecular transducer activity;GO:0003674 molecular\_function  
00)Metabolic pathways

0086)beta-oxidation, acyl-CoA synthesis; (sce00061)Fatty acid biosynthesis

donors with incorporation of molecular oxygen, incorporation of two atoms of oxygen;GO:00

lism; (sce01100)Metabolic pathways

pathway; (M00095)C5 isoprenoid biosynthesis, mevalonate pathway; (sce00900)Terpenoid back  
ng;GO:0003824 catalytic activity  
osynthesis of antibiotics; (sce01110)Biosynthesis of secondary metabolites  
factor binding;GO:0070491 repressing transcription factor binding;GO:0001085 RNA polymer  
tiple species; (sce04144)Endocytosis; (sce03040)Spliceosome

olic pathways

ing;GO:0043178 alcohol binding

doplasmic reticulum; (sce00062)Fatty acid elongation; (sce01040)Biosynthesis of unsaturat  
n, oxaloacetate => 2-oxoglutarate; (sce)Citrate cycle, first carbon oxidation, oxaloaceta  
etabolism; (sce00520)Amino sugar and nucleotide sugar metabolism; (sce01130)Biosynthesis  
activity;GO:0052689 carboxylic ester hydrolase activity  
e cycle, second carbon oxidation, 2-oxoglutarate => oxaloacetate; (M00009)Citrate cycle (

pathway; (M00095)C5 isoprenoid biosynthesis, mevalonate pathway; (sce00900)Terpenoid back  
5198 structural molecule activity;GO:0003674 molecular\_function

00)Metabolic pathways

;GO:0043492 ATPase activity, coupled to movement of substances;GO:0005548 phospholipid tr  
00)Metabolic pathways

binding;GO:0030246 carbohydrate binding

GO:0000293 ferric-chelate reductase activity;GO:0016723 oxidoreductase activity, oxidizin  
Pyrimidine metabolism; (sce00230)Purine metabolism

00)Metabolic pathways

olic pathways

00)Metabolic pathways

y;GO:0015103 inorganic anion transmembrane transporter activity;GO:0008509 anion transmembrane regulator activity;GO:0060589 nucleoside-triphosphatase regulator activity

etabolic pathways

movement of substances;GO:0043492 ATPase activity, coupled to movement of substances;GO:005198 structural molecule activity;GO:0003674 molecular\_function

ic activity;GO:0003674 molecular\_function

etabolic pathways

etabolism

098847 sequence-specific single stranded DNA binding;GO:0042162 telomeric DNA binding

0005365 myo-inositol transmembrane transporter activity;GO:0015166 polyol transmembrane transporter activity; (sce04138)Autophagy - yeast

;GO:0016616 oxidoreductase activity, acting on the CH-OH group of donors, NAD or NADP as oxidizing agent;GO:0016798 hydrolase activity, acting on glycosyl bonds;GO:0016757 transferase activity

ing;GO:0043168 anion binding

ne/threonine kinase activity;GO:0004672 protein kinase activity

4029 aldehyde dehydrogenase (NAD) activity;GO:0016620 oxidoreductase activity, acting on alcohols as oxidizing agent; (sce01100)Metabolic pathways

e bodies; (sce)C5 isoprenoid biosynthesis, mevalonate pathway; (sce00650)Butanoate metabolism

ribosomal small subunit binding;GO:0030674 protein binding, bridging

Pyrimidine metabolism; (sce00230)Purine metabolism

ylative mechanism;GO:0008553 proton-exporting ATPase activity, phosphorylative mechanism; (sce0008553)Proton export

: Hpr5p; YGL101W has a paralog, YBR242W, that arose from the whole genome duplication

gocalciferol biosynthesis; (sce00100)Steroid biosynthesis

ree-carbon compounds; (sce)Glycolysis, core module involving three-carbon compounds; (M00000)Glycolysis;GO:0044877 protein-containing complex binding;GO:0005488 binding

;GO:0032143 single thymine insertion binding;GO:0032138 single base insertion or deletion;GO:0016413 O-acetyltransferase activity;GO:0008374 O-acyltransferase activity

NA-binding transcription factor activity;GO:0140110 transcription regulator activity;GO:0030695 GTPase regulator activity

00)Metabolic pathways

vity;GO:0005313 L-glutamate transmembrane transporter activity;GO:0015172 acidic amino acid transporter activity;GO:0043022 ribosome binding

ctivity;GO:0004713 protein tyrosine kinase activity;GO:0004674 protein serine/threonine kinase activity

activity, hydrolyzing O-glycosyl compounds;GO:0016798 hydrolase activity, acting on glycosyl compounds

de binding;GO:0030554 adenylyl nucleotide binding  
de binding;GO:0030554 adenylyl nucleotide binding  
lism; (sce01100)Metabolic pathways  
tive phase, fructose 6P => ribose 5P; (sce)Pentose phosphate pathway, non-oxidative phase  
0019208 phosphatase regulator activity;GO:0031072 heat shock protein binding  
;GO:0045290 D-arabinose 1-dehydrogenase [NAD(P)+] activity;GO:0016616 oxidoreductase acti  
lecular\_function

ne; (M00026)Histidine biosynthesis, PRPP => histidine; (sce00340)Histidine metabolism  
osynthesis of antibiotics; (sce01100)Metabolic pathways  
itor activity;GO:0004857 enzyme inhibitor activity;GO:0030234 enzyme regulator activity  
etabolism  
ecretion; (hsa04921)Oxytocin signaling pathway  
hosphatase activity;GO:0016462 pyrophosphatase activity  
iphosphatase activity;GO:0016462 pyrophosphatase activity  
00)Metabolic pathways

00)Metabolic pathways

0:0004672 protein kinase activity;GO:0016773 phosphotransferase activity, alcohol group a  
abolic pathways

doreductase activity, acting on NAD(P)H;GO:0016491 oxidoreductase activity

factor binding;GO:0019210 kinase inhibitor activity;GO:0033613 activating transcription  
3676 nucleic acid binding

1269 alpha-keto ester reductase activity;GO:0004032 alditol:NADP+ 1-oxidoreductase activi

olic pathways

osynthesis of antibiotics; (sce01100)Metabolic pathways  
5198 structural molecule activity;GO:0003674 molecular\_function

etic complications; (sce04213)Longevity regulating pathway - multiple species; (sce04138).  
acids; (sce01212)Fatty acid metabolism  
e regulator activity;GO:0060589 nucleoside-triphosphatase regulator activity  
0:0032559 adenylyl ribonucleotide binding  
ctivity;GO:0005280 amino acid:proton symporter activity;GO:0015489 putrescine transmembra  
)Metabolic pathways

0:0004672 protein kinase activity;GO:0016773 phosphotransferase activity, alcohol group a  
al-dependent;GO:0003993 acid phosphatase activity;GO:0004725 protein tyrosine phosphatase  
e cycle, second carbon oxidation, 2-oxoglutarate => oxaloacetate; (M00009)Citrate cycle ('

sm; (sce01110)Biosynthesis of secondary metabolites; (sce01100)Metabolic pathways  
er activity;GO:0005385 zinc ion transmembrane transporter activity;GO:0072509 divalent in  
016620 oxidoreductase activity, acting on the aldehyde or oxo group of donors, NAD or NAD

pyruvate metabolism; (sce04011)MAPK signaling pathway - yeast  
biosynthesis; (sce00100)Steroid biosynthesis; (sce01130)Biosynthesis of antibiotics  
ethane metabolism; (sce00620)Pyruvate metabolism  
GO:0004672 protein kinase activity;GO:0016773 phosphotransferase activity, alcohol group a  
ce-specific DNA binding;GO:0000987 proximal promoter sequence-specific DNA binding;GO:000  
70001 aspartic-type peptidase activity;GO:0043130 ubiquitin binding  
biosynthesis; (sce00100)Steroid biosynthesis; (sce01130)Biosynthesis of antibiotics  
gocalciferol biosynthesis; (sce00100)Steroid biosynthesis

recruiting activity;GO:0001134 transcription regulator recruiting activity;GO:0000978 RNA

roline; (sce00332)Carbapenem biosynthesis; (sce)Proline biosynthesis, glutamate => prolin  
reticulum

GO:0004672 protein kinase activity;GO:0016773 phosphotransferase activity, alcohol group a  
pathway; (M00095)C5 isoprenoid biosynthesis, mevalonate pathway; (sce00900)Terpenoid back

rotein tag;GO:0005515 protein binding  
ribosome binding;GO:0000049 tRNA binding  
1 aminoacyl-tRNA editing activity;GO:0004812 aminoacyl-tRNA ligase activity

lasmic reticulum; (hsa05164)Influenza A  
GO:0050308 sugar-phosphatase activity;GO:0019203 carbohydrate phosphatase activity  
016620 oxidoreductase activity, acting on the aldehyde or oxo group of donors, NAD or NAD  
ndoplasmic reticulum (ER) while mCherry fusion localizes to both the ER and vacuole  
RNA polymerase II-specific;GO:0003700 DNA-binding transcription factor activity;GO:01401  
e metabolism  
GO:0015038 glutathione disulfide oxidoreductase activity;GO:0015037 peptide disulfide oxid  
5198 structural molecule activity;GO:0003674 molecular\_function  
01130)Biosynthesis of antibiotics; (sce01110)Biosynthesis of secondary metabolites

GO)Metabolic pathways

reabsorption

activity;GO:0004864 protein phosphatase inhibitor activity;GO:0019212 phosphatase inhibit

GO)Metabolic pathways

)Metabolic pathways

GO)Metabolic pathways

6791 phosphatase activity;GO:0042578 phosphoric ester hydrolase activity

GO:020037 heme binding;GO:0005506 iron ion binding  
utathionylacetyl)amino) phenylarsenoxide (GSAO); YIL029C has a paralog, YPR071W, that arc  
ree-carbon compounds; (sce)Glycolysis, core module involving three-carbon compounds; (M00  
nding transcription factor recruiting activity;GO:0061629 RNA polymerase II sequence-spec

34318 alcohol 0-acyltransferase activity;GO:0016413 0-acetyltransferase activity

0032550 purine ribonucleoside binding

ity;GO:0005315 inorganic phosphate transmembrane transporter activity;GO:0046915 transiti  
e activity;GO:0036459 thiol-dependent ubiquitinyl hydrolase activity;GO:0004197 cysteine-

oxoglutarate => 2-aminoadipate => lysine; (sce)Lysine biosynthesis, AAA pathway, 2-oxoglu  
ular adaptor activity;GO:0005515 protein binding

0032550 purine ribonucleoside binding

yase activity;GO:0016835 carbon-oxygen lyase activity

olism; (sce00260)Glycine, serine and threonine metabolism; (sce01130)Biosynthesis of anti

0:0016668 oxidoreductase activity, acting on a sulfur group of donors, NAD(P) as acceptor  
factor binding;GO:0070491 repressing transcription factor binding;GO:0001085 RNA polymer  
genase activity;GO:0043783 oxidoreductase activity, oxidizing metal ions with flavin as a

se activity;GO:0050839 cell adhesion molecule binding

34318 alcohol 0-acyltransferase activity;GO:0047617 acyl-CoA hydrolase activity

se => UDP-glucose; (sce)Nucleotide sugar biosynthesis, glucose => UDP-glucose; (sce00051)1

0:0004672 protein kinase activity;GO:0016773 phosphotransferase activity, alcohol group a  
;GO:0005515 protein binding

;GO:0016616 oxidoreductase activity, acting on the CH-OH group of donors, NAD or NADP as

tiple species; (sce04138)Autophagy - yeast; (sce04011)MAPK signaling pathway - yeast

ty, RNA polymerase II-specific;GO:0000981 DNA-binding transcription factor activity, RNA  
cle; (sce00630)Glyoxylate and dicarboxylate metabolism

factor binding;GO:0001102 RNA polymerase II activating transcription factor binding;GO:0

5295 solute:proton symporter activity;GO:0015205 nucleobase transmembrane transporter act

i induced by osmotic stress, starvation and during stationary phase; protein abundance inc

orter activity;GO:0005385 zinc ion transmembrane transporter activity;GO:0072509 divalent

mid transmembrane transporter activity;GO:1901474 azole transmembrane transporter activi

NA-binding transcription factor activity;GO:0140110 transcription regulator activity

lism; (sce04213)Longevity regulating pathway - multiple species; (sce01100)Metabolic path

0005548 phospholipid transporter activity;GO:0005319 lipid transporter activity

ity;GO:0008251 tRNA-specific adenosine deaminase activity;GO:0004000 adenosine deaminase

0:0004672 protein kinase activity;GO:0016773 phosphotransferase activity, alcohol group a

se => UDP-glucose; (sce)Nucleotide sugar biosynthesis, glucose => UDP-glucose; (sce00052)0

sm; (sce00190)Oxidative phosphorylation; (sce01110)Biosynthesis of secondary metabolites

etabolism; (sce01100)Metabolic pathways

16653 oxidoreductase activity, acting on NAD(P)H, heme protein as acceptor;GO:0010181 FMN

e activity;GO:0036459 thiol-dependent ubiquitinyl hydrolase activity;GO:0019783 ubiquitin

ng;GO:0048037 cofactor binding

aminopeptidase activity;GO:0008235 metalloexopeptidase activity

s; (hsa05034)Alcoholism; (hsa05203)Viral carcinogenesis

hionine salvage pathway; (sce00270)Cysteine and methionine metabolism



ular function regulator;GO:0003674 molecular\_function  
rotein dimerization activity;GO:0003700 DNA-binding transcription factor activity  
iphosphatase activity;GO:0016462 pyrophosphatase activity

0019212 phosphatase inhibitor activity;GO:0019888 protein phosphatase regulator activity  
sce00250)Alanine, aspartate and glutamate metabolism; (sce01100)Metabolic pathways

e; (M00074)N-glycan biosynthesis, high-mannose type; (sce00513)Various types of N-glycan

abolic pathways

70)Cysteine and methionine metabolism; (sce01230)Biosynthesis of amino acids

inding;GO:0070577 lysine-acetylated histone binding;GO:0001091 RNA polymerase II basal tr  
ree-carbon compounds; (sce)Glycolysis, core module involving three-carbon compounds; (M00

13)Meiosis - yeast  
reticulum  
reticulum

0)beta-Alanine metabolism; (sce00340)Histidine metabolism  
se activity;GO:0042910 xenobiotic transmembrane transporter activity;GO:0042626 ATPase ac  
g;GO:0051787 misfolded protein binding;GO:0031072 heat shock protein binding  
otein binding;GO:0051082 unfolded protein binding

ree-carbon compounds; (sce)Glycolysis, core module involving three-carbon compounds; (M00  
ty, RNA polymerase II-specific;GO:0000981 DNA-binding transcription factor activity, RNA  
y;GO:0008324 cation transmembrane transporter activity;GO:0015075 ion transmembrane trans  
e01110)Biosynthesis of secondary metabolites; (sce01100)Metabolic pathways  
0098518 polynucleotide phosphatase activity;GO:0016791 phosphatase activity  
tivity;GO:0019707 protein-cysteine S-acyltransferase activity;GO:0016417 S-acyltransferas  
ic compound binding;GO:0097159 organic cyclic compound binding

ce04011)MAPK signaling pathway - yeast; (sce01110)Biosynthesis of secondary metabolites  
bolism

a04151)PI3K-Akt signaling pathway  
n binding;GO:0005488 binding

arch and sucrose metabolism; (sce01100)Metabolic pathways

00)Metabolic pathways  
e protein binding;GO:0005515 protein binding  
etalloptidase activity;GO:0004175 endopeptidase activity  
gocalciferol biosynthesis; (sce00100)Steroid biosynthesis

vity;GO:0015038 glutathione disulfide oxidoreductase activity;GO:0016672 oxidoreductase a  
hosphate cycle); (sce)Pentose phosphate pathway (Pentose phosphate cycle); (M00001)Glycol  
ity;GO:0015926 glucosidase activity;GO:0004553 hydrolase activity, hydrolyzing O-glycosyl

serine; (sce)Serine biosynthesis, glycerate-3P => serine; (sce00680)Methane metabolism  
binding;GO:0043021 ribonucleoprotein complex binding  
tiple species; (sce04144)Endocytosis; (sce03040)Spliceosome

movement of substances;GO:0043492 ATPase activity, coupled to movement of substances;GO:0  
ion binding;GO:0008270 zinc ion binding

00)Metabolic pathways  
0032550 purine ribonucleoside binding  
etabolism; (sce01130)Biosynthesis of antibiotics; (sce01100)Metabolic pathways  
olic pathways

0:0004672 protein kinase activity;GO:0016773 phosphotransferase activity, alcohol group a

NA binding;GO:0046872 metal ion binding

nding;GO:0005515 protein binding

y;GO:0042124 1,3-beta-glucanosyltransferase activity;GO:0042123 glucanosyltransferase act  
guanine biosynthesis; (sce01100)Metabolic pathways  
00)Metabolic pathways

3676 nucleic acid binding

GO:0043139 5'-3' DNA helicase activity;GO:0004003 ATP-dependent DNA helicase activity

(hsa04068)FoxO signaling pathway  
reticulum  
olic pathways  
n, oxaloacetate => 2-oxoglutarate; (sce)Citrate cycle, first carbon oxidation, oxaloaceta  
ine and methionine metabolism; (sce01200)Carbon metabolism

g;GO:1901363 heterocyclic compound binding  
inine biosynthesis; (sce00630)Glyoxylate and dicarboxylate metabolism  
ce-specific DNA binding;GO:0000987 proximal promoter sequence-specific DNA binding;GO:000  
transmembrane transporter activity;GO:0005347 ATP transmembrane transporter activity

=> GDP,GTP; (sce)Adenine ribonucleotide biosynthesis, IMP => ADP,ATP; (M00002)Glycolysis  
00)Metabolic pathways  
16653 oxidoreductase activity, acting on NAD(P)H, heme protein as acceptor;GO:0010181 FMN

ree-carbon compounds; (sce)Glycolysis, core module involving three-carbon compounds; (M00  
 G0:0008525 phosphatidylcholine transporter activity;G0:0005548 phospholipid transporter a  
 Pyrimidine metabolism; (sce00230)Purine metabolism  
 )Metabolic pathways  
 tiple species; (sce04146)Peroxisome  
 0004869 cysteine-type endopeptidase inhibitor activity;G0:0004843 thiol-dependent ubiquit  
  
 itor activity;G0:0072542 protein phosphatase activator activity;G0:0019211 phosphatase ac  
 )Pantothenate and CoA biosynthesis; (sce01110)Biosynthesis of secondary metabolites  
  
 doreductase activity, acting on NAD(P)H;G0:0016491 oxidoreductase activity  
 tein binding;G0:0005515 protein binding  
 te permease (Dal5p) subfamily of the major facilitator superfamily; mRNA expression is el  
  
 6983 protein dimerization activity;G0:0003677 DNA binding  
  
 )Arginine and proline metabolism  
  
 y;G0:0015103 inorganic anion transmembrane transporter activity;G0:0008509 anion transmem  
 luctase active site  
  
 ular function regulator;G0:0003674 molecular\_function  
  
 phosphatase regulator activity;G0:0008047 enzyme activator activity  
  
 )Valine, leucine and isoleucine degradation; (sce00340)Histidine metabolism  
 0480)Glutathione metabolism  
 lism; (sce04146)Peroxisome; (sce01100)Metabolic pathways  
  
 idylinositol binding;G0:0005543 phospholipid binding  
  
 0019787 ubiquitin-like protein transferase activity;G0:0140096 catalytic activity, acting  
  
 733 peptide-lysine-N-acetyltransferase activity;G0:0034212 peptide N-acetyltransferase ac  
  
 ce04111)Cell cycle - yeast; (sce04113)Meiosis - yeast  
 G0:0005261 cation channel activity;G0:0022839 ion gated channel activity  
  
 ty;G0:0000099 sulfur amino acid transmembrane transporter activity;G0:0015179 L-amino aci  
  
 ivity;G0:0051185 coenzyme transmembrane transporter activity;G0:0008028 monocarboxylic ac  
 osynthesis of antibiotics; (sce01100)Metabolic pathways

reticulum

g;G0:0043167 ion binding

phase, glucose 6P => ribulose 5P; (sce)Pentose phosphate pathway, oxidative phase, gluco

choline => PC; (sce00440)Phosphonate and phosphinate metabolism; (sce00565)Ether lipid me

RNA polymerase II-specific;G0:0043565 sequence-specific DNA binding;G0:0003700 DNA-bind  
sce00561)Glycerolipid metabolism; (sce00680)Methane metabolism

inson's disease; (hsa04022)cGMP-PKG signaling pathway

s; (hsa05034)Alcoholism; (hsa05202)Transcriptional misregulation in cancer

phase, glucose 6P => ribulose 5P; (sce)Pentose phosphate pathway, oxidative phase, gluco

ein complex binding;G0:0044877 protein-containing complex binding

0:0080025 phosphatidylinositol-3,5-bisphosphate binding;G0:0070273 phosphatidylinositol-4

; (sce)GABA (gamma-Aminobutyrate) shunt; (M00027)GABA (gamma-Aminobutyrate) shunt

ated in highly purified mitochondria in high-throughput studies; deletion confers sensitiv

pathway; (M00095)C5 isoprenoid biosynthesis, mevalonate pathway; (sce00900)Terpenoid back

peroxiredoxin activity;G0:0004601 peroxidase activity

orter activity;G0:1903089 5-amino-1-ribofuranosylimidazole-4-carboxamide transmembrane tr

0016783 sulfurtransferase activity;G0:0016782 transferase activity, transferring sulfur-c

ator activity;G0:0030695 GTPase regulator activity

factor binding;G0:0070491 repressing transcription factor binding;G0:0001085 RNA polymer

00)Metabolic pathways

e protein binding;G0:0005085 guanyl-nucleotide exchange factor activity

ty;G0:0005198 structural molecule activity;G0:0005515 protein binding

protein binding;G0:0005488 binding

2-oxoadipate; (M00433)Lysine biosynthesis, 2-oxoglutarate => 2-oxoadipate; (M00030)Lysine

00)Metabolic pathways  
 reticulum  
 ;G0:0016616 oxidoreductase activity, acting on the CH-OH group of donors, NAD or NADP as  
 n; (sce)Valine/isoleucine biosynthesis, pyruvate => valine / 2-oxobutanoate => isoleucine  
  
 00)Metabolic pathways  
 3420)Nucleotide excision repair  
  
 g;G0:1901363 heterocyclic compound binding  
 s; (hsa05034)Alcoholism; (hsa05203)Viral carcinogenesis  
  
  
 ne metabolism; (sce00230)Purine metabolism  
  
 hiamine metabolism; (sce01100)Metabolic pathways  
 transferase activity;G0:0008172 S-methyltransferase activity;G0:0008168 methyltransferase  
 30)Glyoxylate and dicarboxylate metabolism; (sce00260)Glycine, serine and threonine metab  
 reticulum  
  
 92 endoribonuclease activity, producing 3'-phosphomonoesters;G0:0004549 tRNA-specific rib  
  
 e01100)Metabolic pathways  
 reclamation  
 ty acid degradation; (sce00010)Glycolysis / Gluconeogenesis  
  
 198 structural molecule activity;G0:0003674 molecular\_function  
 etabolism  
 sphorylation; (sce01100)Metabolic pathways  
 4 molecular\_function  
 s, PE => PC; (sce)Phosphatidylcholine (PC) biosynthesis, PE => PC; (sce00564)Glycerophospl  
 ne metabolism; (sce00230)Purine metabolism  
 :0036374 glutathione hydrolase activity;G0:0008242 omega peptidase activity  
  
 vity;G0:0004866 endopeptidase inhibitor activity;G0:0061135 endopeptidase regulator activ  
  
 nthesis of antibiotics; (sce01100)Metabolic pathways  
 ter activity;G0:0015291 secondary active transmembrane transporter activity;G0:0022804 ac  
 )Metabolic pathways  
  
 yase activity;G0:0016835 carbon-oxygen lyase activity  
 7 cytoplasm  
  
 00)Metabolic pathways  
  
  
 RNA polymerase II-specific;G0:0008270 zinc ion binding;G0:0043565 sequence-specific DNA  
 3676 nucleic acid binding  
 e04070)Phosphatidylinositol signaling system; (sce01100)Metabolic pathways  
 11)Cell cycle - yeast; (sce04113)Meiosis - yeast

alanine, aspartate and glutamate metabolism; (sce01230)Biosynthesis of amino acids

e => valine / 2-oxobutanoate => isoleucine; (M00019)Valine/isoleucine biosynthesis, pyruvate movement of substances;G0:0043492 ATPase activity, coupled to movement of substances;G0:0043492 4-hydroxybenzoate => ubiquinone; (sce)Ubiquinone biosynthesis, eukaryotes, 4-hydroxybenzoate

hionine salvage pathway; (sce00270)Cysteine and methionine metabolism  
multiple species; (sce04144)Endocytosis; (sce03040)Spliceosome  
e regulator activity;G0:0098772 molecular function regulator  
phosphatase activity;G0:0043812 phosphatidylinositol-4-phosphate phosphatase activity;G0:0043812

metabolism

protein localizes to the vacuole; expression directly regulated by the metabolic and meiotic  
198 structural molecule activity;G0:0003674 molecular\_function  
y;G0:0016278 lysine N-methyltransferase activity;G0:0008276 protein methyltransferase activity  
sequence-specific DNA binding;G0:0000987 proximal promoter sequence-specific DNA binding;G0:0000987  
n binding;G0:0005488 binding

RNA polymerase II-specific;G0:0008270 zinc ion binding;G0:0043565 sequence-specific DNA binding

004674 protein serine/threonine kinase activity;G0:0004672 protein kinase activity  
glycan precursor trimming; (sce)N-glycan biosynthesis, high-mannose type

se => UDP-glucose; (sce)Nucleotide sugar biosynthesis, glucose => UDP-glucose; (sce00051)Nucleotide

ial promoter sequence-specific DNA binding;G0:0003899 DNA-directed 5'-3' RNA polymerase activity  
multiple species; (sce04138)Autophagy - yeast; (sce04113)Meiosis - yeast

sce00052)Galactose metabolism; (M00001)Glycolysis (Embden-Meyerhof pathway), glucose => pyruvate  
tamine (+ PRPP) => UMP; (M00051)Uridine monophosphate biosynthesis, glutamine (+ PRPP) => glutamate  
abolic pathways

04 peptidase activator activity;G0:0061134 peptidase regulator activity

)Valine, leucine and isoleucine degradation; (sce00340)Histidine metabolism

roline; (sce00332)Carbapenem biosynthesis; (sce)Proline biosynthesis, glutamate => proline  
binding;G0:0003676 nucleic acid binding  
e regulator activity;G0:0098772 molecular function regulator

> THF; (sce)Tetrahydrofolate biosynthesis, GTP => THF; (sce00790)Folate biosynthesis

e-specific double-stranded DNA binding;G0:0003690 double-stranded DNA binding  
homoserine => threonine; (sce)Threonine biosynthesis, aspartate => homoserine => threonine  
ylative mechanism;G0:0008553 proton-exporting ATPase activity, phosphorylative mechanism;

27)GABA (gamma-Aminobutyrate) shunt; (sce00650)Butanoate metabolism  
 e regulator activity;GO:0098772 molecular function regulator  
 etabolism; (sce01110)Biosynthesis of secondary metabolites; (sce01100)Metabolic pathways

ty;GO:0015175 neutral amino acid transmembrane transporter activity;GO:0015179 L-amino ac  
 signaling pathway - yeast  
 0032550 purine ribonucleoside binding  
 :0004090 carbonyl reductase (NADPH) activity;GO:0008106 alcohol dehydrogenase (NADP+) act  
 olism; (sce00260)Glycine, serine and threonine metabolism; (sce01200)Carbon metabolism  
 0:1901981 phosphatidylinositol phosphate binding;GO:0035091 phosphatidylinositol binding  
 hionine salvage pathway; (sce00410)beta-Alanine metabolism

00)Metabolic pathways

ing;GO:0046625 sphingolipid binding;GO:1902936 phosphatidylinositol bisphosphate binding  
 bon metabolism

8186 RNA-dependent ATPase activity;GO:0003724 RNA helicase activity

is (ALS); (hsa04370)VEGF signaling pathway; (hsa04924)Renin secretion  
 0015215 nucleotide transmembrane transporter activity;GO:0051184 cofactor transmembrane t

rsions; (sce01100)Metabolic pathways  
 ptidase regulator activity;GO:0004857 enzyme inhibitor activity

sulfur cluster binding;GO:0051539 4 iron, 4 sulfur cluster binding  
 te + erythrose-4P => chorismate; (sce)Shikimate pathway, phosphoenolpyruvate + erythrose-

ivity;GO:0016436 rRNA (uridine) methyltransferase activity;GO:0016435 rRNA (guanine) meth  
 0:0015038 glutathione disulfide oxidoreductase activity;GO:0015037 peptide disulfide oxid

ity;GO:0000297 spermine transmembrane transporter activity;GO:0015203 polyamine transmemb  
 e04070)Phosphatidylinositol signaling system; (sce01100)Metabolic pathways  
 -anchor biosynthesis; (sce01100)Metabolic pathways  
 ce-specific DNA binding;GO:0000987 proximal promoter sequence-specific DNA binding;GO:000

5)N-glycan precursor biosynthesis; (sce00510)N-Glycan biosynthesis  
 reticulum

; (sce01100)Metabolic pathways

0)beta-Alanine metabolism; (sce00340)Histidine metabolism

0019787 ubiquitin-like protein transferase activity;GO:0140096 catalytic activity, acting

fic DNA binding;GO:0046914 transition metal ion binding

hagy - yeast; (sce04138)Autophagy - yeast

75 superoxide-generating NADPH oxidase activity;GO:0016723 oxidoreductase activity, oxidiz

n, oxaloacetate => 2-oxoglutarate; (sce)Citrate cycle, first carbon oxidation, oxaloaceta

)Longevity regulating pathway - multiple species; (hsa04920)Adipocytokine signaling pathwa

5198 structural molecule activity;GO:0003674 molecular\_function

198 structural molecule activity;GO:0003674 molecular\_function

filament binding;GO:0003779 actin binding

2 serine-type endopeptidase activity;GO:0003697 single-stranded DNA binding

binding;GO:0005488 binding

rsions; (sce01100)Metabolic pathways

NA secondary structure binding;GO:0003697 single-stranded DNA binding

6791 phosphatase activity;GO:0042578 phosphoric ester hydrolase activity

70001 aspartic-type peptidase activity;GO:0004175 endopeptidase activity

etabolic pathways

e01110)Biosynthesis of secondary metabolites; (sce01100)Metabolic pathways

5198 structural molecule activity;GO:0003674 molecular\_function

is

0005365 myo-inositol transmembrane transporter activity;GO:0015166 polyol transmembrane t

00)Metabolic pathways

emase and epimerase activity, acting on carbohydrates and derivatives;GO:0016854 racemase

5198 structural molecule activity;GO:0003674 molecular\_function

16491 oxidoreductase activity;GO:0003824 catalytic activity

olism; (sce00680)Methane metabolism; (sce00250)Alanine, aspartate and glutamate metabolism

674 molecular\_function

ne; (M00026)Histidine biosynthesis, PRPP => histidine; (sce00360)Phenylalanine metabolism

;GO:1904680 peptide transmembrane transporter activity;GO:0022884 macromolecule transmembr

n, oxaloacetate => 2-oxoglutarate; (sce)Citrate cycle, first carbon oxidation, oxaloaceta

pendent ATPase activity;GO:0042623 ATPase activity, coupled

9 ubiquitin-like protein ligase binding;GO:0019899 enzyme binding

rotein localizes to the endoplasmic reticulum; YLR050C is not an essential gene

00)Metabolic pathways

GO:0043138 3'-5' DNA helicase activity;GO:0004003 ATP-dependent DNA helicase activity



lycerol degradation; (sce00561)Glycerolipid metabolism  
ding;GO:0008092 cytoskeletal protein binding

lism; (sce04213)Longevity regulating pathway - multiple species; (sce01100)Metabolic path  
osynthesis of antibiotics; (sce01110)Biosynthesis of secondary metabolites

18)RNA degradation

ctose-6P; (sce)Gluconeogenesis, oxaloacetate => fructose-6P; (sce00051)Fructose and manno  
236 serine-type peptidase activity;GO:0017171 serine hydrolase activity

ferase activity;GO:0008168 methyltransferase activity;GO:0016741 transferase activity, tr

nding;GO:0003676 nucleic acid binding

e;GO:0008641 ubiquitin-like modifier activating enzyme activity;GO:0016877 ligase activit

ein complex binding;GO:0044877 protein-containing complex binding

mRNA binding;GO:0008289 lipid binding

ity;GO:0000993 RNA polymerase II complex binding;GO:0043175 RNA polymerase core enzyme bi

cle; (sce)Citrate cycle, second carbon oxidation, 2-oxoglutarate => oxaloacetate

lanine, aspartate and glutamate metabolism; (sce01210)2-Oxocarboxylic acid metabolism

)Glycerophospholipid metabolism; (sce01110)Biosynthesis of secondary metabolites

ce-specific DNA binding;GO:0000987 proximal promoter sequence-specific DNA binding;GO:000

y;GO:0008028 monocarboxylic acid transmembrane transporter activity;GO:0046943 carboxylic

ty;GO:0005198 structural molecule activity;GO:0005515 protein binding

0000030 mannosyltransferase activity;GO:0016758 transferase activity, transferring hexosy

00)Metabolic pathways

ce04141)Protein processing in endoplasmic reticulum

opolyphosphatase activity;GO:0016462 pyrophosphatase activity

104 succinate dehydrogenase activity;GO:0016628 oxidoreductase activity, acting on the CH  
2-oxoadipate; (M00433)Lysine biosynthesis, 2-oxoglutarate => 2-oxoadipate; (M00030)Lysine

;GO:0005488 binding

used expression analysis, and genome-wide homology searching

compounds;GO:0016810 hydrolase activity, acting on carbon-nitrogen (but not peptide) bon

ity;GO:0016426 tRNA (adenine) methyltransferase activity;GO:0008175 tRNA methyltransferas

## 00)Metabolic pathways

ty, RNA polymerase II-specific;GO:0000981 DNA-binding transcription factor activity, RNA  
ty, RNA polymerase II-specific;GO:0001012 RNA polymerase II regulatory region DNA binding  
tivity;GO:0003824 catalytic activity

utLbeta complex binding;GO:0032135 DNA insertion or deletion binding

ctivity;GO:0004674 protein serine/threonine kinase activity;GO:0003729 mRNA binding

vity;GO:0004032 alditol:NADP+ 1-oxidoreductase activity;GO:0008106 alcohol dehydrogenase  
)Glycerophospholipid metabolism; (sce01110)Biosynthesis of secondary metabolites

0:0043169 cation binding

00083)Fatty acid biosynthesis, elongation; (sce)Fatty acid biosynthesis, initiation

GO:0004145 diamine N-acetyltransferase activity;GO:0008080 N-acetyltransferase activity  
de binding;GO:0032561 guanyl ribonucleotide binding

pathway; (M00095)C5 isoprenoid biosynthesis, mevalonate pathway; (sce00900)Terpenoid back  
tivity;GO:0003674 molecular\_function

tiple species; (sce04144)Endocytosis; (sce03040)Spliceosome  
etic complications; (sce04011)MAPK signaling pathway - yeast

osine degradation; (sce00600)Sphingolipid metabolism

## 40)Pyrimidine metabolism

RNA polymerase II-specific;GO:0008270 zinc ion binding;GO:0043565 sequence-specific DNA  
mRNA binding;GO:0003723 RNA binding

tein transporter activity;GO:0005215 transporter activity

tein transferase activity;GO:0019787 ubiquitin-like protein transferase activity

activity;GO:0004860 protein kinase inhibitor activity;GO:0019789 SUMO transferase activit

sce01040)Biosynthesis of unsaturated fatty acids; (sce00280)Valine, leucine and isoleucin

## )Metabolic pathways

ific DNA binding;GO:0003677 DNA binding

tivity;GO:0003674 molecular\_function

oside-triphosphatase regulator activity;GO:0030234 enzyme regulator activity

## 40)Spliceosome; (sce03013)RNA transport

GO:0017005 3'-tyrosyl-DNA phosphodiesterase activity;GO:0070259 tyrosyl-DNA phosphodieste

y;GO:0046915 transition metal ion transmembrane transporter activity;GO:0046873 metal ion  
ity;GO:0004721 phosphoprotein phosphatase activity;GO:0016791 phosphatase activity  
g;GO:1901363 heterocyclic compound binding  
tivity;GO:0034228 ethanolamine transmembrane transporter activity;GO:0015226 carnitine tr  
sm; (sce01110)Biosynthesis of secondary metabolites; (sce01100)Metabolic pathways

1630 ubiquitin protein ligase activity;GO:0061659 ubiquitin-like protein ligase activity

03674 molecular\_function

hagy - yeast

rol transmembrane transporter activity;GO:0015166 polyol transmembrane transporter activi

215 transporter activity;GO:0003674 molecular\_function

se activity;GO:0042171 lysophosphatidic acid acyltransferase activity;GO:0016411 acylglyc

yltransferase activity;GO:0003880 protein C-terminal carboxyl O-methyltransferase activit

yl cis-trans isomerase activity;GO:0016859 cis-trans isomerase activity

cle; (sce)Citrate cycle, second carbon oxidation, 2-oxoglutarate => oxaloacetate

sce01130)Biosynthesis of antibiotics; (sce01110)Biosynthesis of secondary metabolites

compounds;GO:0016798 hydrolase activity, acting on glycosyl bonds;GO:0016757 transferase

e01110)Biosynthesis of secondary metabolites; (sce01100)Metabolic pathways

osynthesis of antibiotics; (sce01110)Biosynthesis of secondary metabolites

tamine (+ PRPP) => UMP; (M00051)Uridine monophosphate biosynthesis, glutamine (+ PRPP) =>

198 structural molecule activity;GO:0003674 molecular\_function

tryptophan; (M00023)Tryptophan biosynthesis, chorismate => tryptophan; (sce00400)Phenylal

kinase activity;GO:0097472 cyclin-dependent protein kinase activity;GO:0004674 protein se

phosphatase activity;GO:0042578 phosphoric ester hydrolase activity

00)Carbon metabolism; (sce01100)Metabolic pathways

0003924 GTPase activity;GO:0005525 GTP binding

ty, RNA polymerase II-specific;GO:0000978 RNA polymerase II proximal promoter sequence-sp

ne metabolism; (sce00230)Purine metabolism

reticulum

ated in highly purified mitochondria in high-throughput studies

ctose-6P; (sce)Gluconeogenesis, oxaloacetate => fructose-6P; (sce00051)Fructose and manno

cetylase activity;GO:0016787 hydrolase activity

er activity;GO:0072349 modified amino acid transmembrane transporter activity;GO:1901682

protein transferase activity;GO:0051020 GTPase binding

9055 electron transfer activity;GO:0050662 coenzyme binding

4-hydroxybenzoate => ubiquinone; (sce)Ubiquinone biosynthesis, eukaryotes, 4-hydroxybenzoate  
1100)Metabolic pathways  
reticulum  
se => UDP-glucose; (sce)Nucleotide sugar biosynthesis, glucose => UDP-glucose; (sce00052)

is (ALS); (hsa04370)VEGF signaling pathway; (hsa04924)Renin secretion

vity;GO:0005088 Ras guanyl-nucleotide exchange factor activity;GO:0017137 Rab GTPase binding  
s; (hsa05034)Alcoholism; (hsa05203)Viral carcinogenesis  
;GO:1904680 peptide transmembrane transporter activity;GO:0022884 macromolecule transmembrane  
specific);GO:0010485 H4 histone acetyltransferase activity;GO:0004402 histone acetyltransferase

otein deacetylase activity;GO:0019213 deacetylase activity

NA binding;GO:0046872 metal ion binding

712 transcription coregulator activity;GO:0003682 chromatin binding

ne metabolism; (sce00230)Purine metabolism

iosynthesis of secondary metabolites; (sce01100)Metabolic pathways

70001 aspartic-type peptidase activity;GO:0004175 endopeptidase activity

0005548 phospholipid transporter activity;GO:0005319 lipid transporter activity

015377 cation:chloride symporter activity;GO:0015296 anion:cation symporter activity

0:0004672 protein kinase activity;GO:0016773 phosphotransferase activity, alcohol group acceptor

iphosphatase activity;GO:0016462 pyrophosphatase activity

120)Ubiquitin mediated proteolysis; (sce04141)Protein processing in endoplasmic reticulum

y;GO:0016278 lysine N-methyltransferase activity;GO:0008276 protein methyltransferase activity

733 peptide-lysine-N-acetyltransferase activity;GO:0034212 peptide N-acetyltransferase activity

, nitrogenous group as acceptor;GO:0016651 oxidoreductase activity, acting on NAD(P)H;GO:0005682

10 kinase inhibitor activity;GO:0019887 protein kinase regulator activity

0:0004672 protein kinase activity;GO:0016773 phosphotransferase activity, alcohol group acceptor

hiamine metabolism; (sce01100)Metabolic pathways

ce04111)Cell cycle - yeast; (sce04113)Meiosis - yeast

Cysteine and methionine metabolism; (sce01100)Metabolic pathways

RNA polymerase III type 1 promoter DNA binding;GO:0080084 5S rDNA binding

ng phospholipase activity;GO:0070290 N-acylphosphatidylethanolamine-specific phospholipase

activity;GO:0140097 catalytic activity, acting on DNA

047372 acylglycerol lipase activity;GO:0004806 triglyceride lipase activity

y;GO:0000831 inositol hexakisphosphate 6-kinase activity;GO:0052723 inositol hexakisphosphate

A replication; (sce03420)Nucleotide excision repair

Cysteine and methionine metabolism; (sce01100)Metabolic pathways

vity;GO:0036080 purine nucleotide-sugar transmembrane transporter activity;GO:0005338 nucleoside

6791 phosphatase activity;GO:0042578 phosphoric ester hydrolase activity

RNA polymerase II-specific;G0:0043565 sequence-specific DNA binding;G0:0003700 DNA-binding

ce-specific DNA binding;GO:0000987 proximal promoter sequence-specific DNA binding;GO:000

hionine salvage pathway; (sce00330)Arginine and proline metabolism

3676 nucleic acid binding

etallopeptidase activity;GO:0004175 endopeptidase activity

;GO:1904680 peptide transmembrane transporter activity;GO:0022884 macromolecule transmembr

)Glyoxylate and dicarboxylate metabolism; (sce00260)Glycine, serine and threonine metabolism

tryptophan; (M00023)Tryptophan biosynthesis, chorismate => tryptophan; (sce00400)Phenylalanine

25 anchored component of membrane

16891 endoribonuclease activity, producing 5'-phosphomonoesters;GO:0016893 endonuclease activity

;GO:0015086 cadmium ion transmembrane transporter activity;GO:0005310 dicarboxylic acid

3676 nucleic acid binding

etic complications; (sce04139)Mitophagy - yeast; (sce04011)MAPK signaling pathway - yeast

ein complex binding;GO:0044877 protein-containing complex binding

aminopeptidase activity;GO:0008235 metalloexopeptidase activity

;GO:0033744 L-methionine:thioredoxin-disulfide S-oxidoreductase activity;GO:0008113 peptidyl

712 transcription coregulator activity;GO:0140110 transcription regulator activity

ding;GO:0008134 transcription factor binding;GO:0000981 DNA-binding transcription factor

de binding;GO:0032561 guanyl ribonucleotide binding

ivity;GO:0005384 manganese ion transmembrane transporter activity;GO:0005381 iron ion transmembrane

9 4 iron, 4 sulfur cluster binding;GO:0051536 iron-sulfur cluster binding

g;GO:1901363 heterocyclic compound binding

ic compound binding;GO:0097159 organic cyclic compound binding

alpha kinase activity;GO:0045182 translation regulator activity;GO:0004674 protein serine/threonine

g;GO:0005488 binding

me kinetochore;GO:0000780 condensed nuclear chromosome, centromeric region

binding;GO:0003682 chromatin binding

e activity;GO:0036459 thiol-dependent ubiquitinyl hydrolase activity;GO:0004197 cysteine-dependent  
ated in highly purified mitochondria in high-throughput studies

ator activity;GO:0030695 GTPase regulator activity

8 single base insertion or deletion binding;GO:0032137 guanine/thymine mispair binding

vity;GO:0008174 mRNA methyltransferase activity;GO:0008173 RNA methyltransferase activity  
olic pathways

ein complex binding;GO:0044877 protein-containing complex binding

0138 ubiquitin-like protein-specific isopeptidase activity;GO:0016929 SUMO-specific protease

e regulator activity;GO:0060589 nucleoside-triphosphatase regulator activity

3420)Nucleotide excision repair

ament binding;GO:0003779 actin binding

ctivity;GO:0034431 bis(5'-adenosyl)-hexaphosphatase activity;GO:0052840 inositol diphosphatase

protein (GFP)-fusion protein localizes to the cytoplasm

ein complex binding;GO:0044877 protein-containing complex binding  
cription coregulator activity;GO:0008134 transcription factor binding

fic);GO:0032452 histone demethylase activity;GO:0035064 methylated histone binding  
phase, glucose 6P => ribulose 5P; (sce)Pentose phosphate pathway, oxidative phase, gluco

ty;GO:0003924 GTPase activity;GO:0005525 GTP binding  
onstituent of nuclear pore;GO:0005096 GTPase activator activity

yosin II binding;GO:0032036 myosin heavy chain binding

0:1901981 phosphatidylinositol phosphate binding;GO:0035091 phosphatidylinositol binding  
tive transmembrane transporter activity;GO:0015322 secondary active oligopeptide transmem  
> CoA; (M00120)Coenzyme A biosynthesis, pantothenate => CoA; (sce00770)Pantothenate and C  
sm; (sce01110)Biosynthesis of secondary metabolites; (sce01100)Metabolic pathways  
5198 structural molecule activity;GO:0003674 molecular\_function

ce04111)Cell cycle - yeast; (sce04113)Meiosis - yeast  
0:0005515 protein binding  
reticulum

=> GDP,GTP; (M00050)Guanine ribonucleotide biosynthesis IMP => GDP,GTP; (sce00230)Purine  
sis - yeast  
otein binding;GO:0005515 protein binding  
09982 pseudouridine synthase activity;GO:0016866 intramolecular transferase activity

y;GO:0000099 sulfur amino acid transmembrane transporter activity;GO:0015175 neutral amin  
;GO:0017111 nucleoside-triphosphatase activity  
GO:0016972 thiol oxidase activity;GO:0016670 oxidoreductase activity, acting on a sulfur  
UMP => UDP/UTP,CDP/CTP; (M00052)Pyrimidine ribonucleotide biosynthesis, UMP => UDP/UTP,C

0:1901981 phosphatidylinositol phosphate binding;GO:0043130 ubiquitin binding  
198 structural molecule activity;GO:0003674 molecular\_function  
ity;GO:0003682 chromatin binding  
id transporter activity;GO:0005215 transporter activity

factor binding;GO:0033613 activating transcription factor binding;GO:0001085 RNA polymer

ein complex binding;GO:0044877 protein-containing complex binding  
340 RNA 7-methylguanosine cap binding;GO:0000339 RNA cap binding  
g;GO:0043167 ion binding

198 structural molecule activity;GO:0003723 RNA binding

single-stranded DNA binding;GO:1990837 sequence-specific double-stranded DNA binding  
004721 phosphoprotein phosphatase activity;GO:0016791 phosphatase activity  
136 sialic acid transmembrane transporter activity;GO:0015355 secondary active monocarbox

e04070)Phosphatidylinositol signaling system; (sce04136)Autophagy - other

s; (hsa05034)Alcoholism; (hsa05202)Transcriptional misregulation in cancer  
3676 nucleic acid binding

recruiting activity;GO:0000979 RNA polymerase II core promoter sequence-specific DNA binding  
sm; (sce01110)Biosynthesis of secondary metabolites; (sce00970)Aminoacyl-tRNA biosynthesis  
reticulum  
de binding;GO:0032561 guanyl ribonucleotide binding  
tivity;GO:0019707 protein-cysteine S-acyltransferase activity;GO:0016417 S-acyltransferase  
nsferase; (sce)N-glycosylation by oligosaccharyltransferase; (sce00510)N-Glycan biosynthesis  
712 transcription coregulator activity;GO:0140110 transcription regulator activity  
16616 oxidoreductase activity, acting on the CH-OH group of donors, NAD or NADP as acceptor  
8186 RNA-dependent ATPase activity;GO:0003724 RNA helicase activity

MN reductase (NADPH) activity;GO:0003955 NAD(P)H dehydrogenase (quinone) activity  
59 ubiquitin-like protein ligase activity;GO:0004842 ubiquitin-protein transferase activity

nslation repressor activity;GO:0045182 translation regulator activity  
translation repressor activity, mRNA regulatory element binding;GO:0016896 exoribonuclease

g;GO:0051787 misfolded protein binding;GO:0031072 heat shock protein binding  
sce00052)Galactose metabolism; (M00001)Glycolysis (Embden-Meyerhof pathway), glucose => pyruvate

ds;GO:0016787 hydrolase activity;GO:0003824 catalytic activity  
ding;GO:0070006 metalloaminopeptidase activity;GO:0043023 ribosomal large subunit binding

3676 nucleic acid binding

74 ATP-dependent microtubule motor activity, plus-end-directed;GO:1990939 ATP-dependent microtubule

mRNA binding;GO:0003723 RNA binding  
n, oxaloacetate => 2-oxoglutarate; (sce)Citrate cycle, first carbon oxidation, oxaloacetate

thesis, PA => PS => PE; (sce)Phosphatidylethanolamine (PE) biosynthesis, PA => PS => PE;  
itin-protein transferase activity;GO:0060090 molecular adaptor activity  
ree-carbon compounds; (sce)Glycolysis, core module involving three-carbon compounds; (M00001)Glycolysis

acyltransferase activity;GO:0016407 acetyltransferase activity  
ivity;GO:0140098 catalytic activity, acting on RNA;GO:0003723 RNA binding

ity;GO:0052690 trichloro-p-hydroquinone reductive dehalogenase activity;GO:0003959 NADPH-dependent  
440)Homologous recombination

activity;GO:0015171 amino acid transmembrane transporter activity;GO:0046943 carboxylic acid  
ane transporter activity;GO:0015142 tricarboxylic acid transmembrane transporter activity



-3 substituted reducing group;GO:0052861 glucan endo-1,3-beta-glucanase activity, C-3 sub

sce01130)Biosynthesis of antibiotics

712 transcription coregulator activity;GO:0140110 transcription regulator activity

2-oxoglutarate => oxaloacetate; (M00009)Citrate cycle (TCA cycle, Krebs cycle); (M00011)(

tivity;GO:0055106 ubiquitin-protein transferase regulator activity;GO:0004857 enzyme inhi

cular function regulator;GO:0003674 molecular\_function

ansport; (sce04138)Autophagy - yeast

ein complex binding;GO:0044877 protein-containing complex binding

e regulator activity;GO:0008092 cytoskeletal protein binding

rter activity;GO:0005315 inorganic phosphate transmembrane transporter activity;GO:001560

09 kinase activator activity;GO:0019887 protein kinase regulator activity

198 structural molecule activity;GO:0003723 RNA binding

linositol binding;GO:0015248 sterol transporter activity

recruiting activity;GO:0001134 transcription regulator recruiting activity;GO:0003712 tra

g;GO:0005488 binding

sis - yeast

protein binding;GO:0005488 binding

70001 aspartic-type peptidase activity;GO:0004175 endopeptidase activity

hionine salvage pathway; (sce00270)Cysteine and methionine metabolism

488 binding;GO:0003674 molecular\_function

ne metabolism; (sce00230)Purine metabolism

9 ubiquitin-like protein ligase binding;GO:0019899 enzyme binding

RNA polymerase II-specific;GO:0043565 sequence-specific DNA binding;GO:0003700 DNA-bindi

75 RNA polymerase core enzyme binding;GO:0001099 basal RNA polymerase II transcription ma

9 ubiquitin-like protein ligase binding;GO:0019899 enzyme binding

ity;GO:0010340 carboxyl-O-methyltransferase activity;GO:0008171 O-methyltransferase activ

0008135 translation factor activity, RNA binding;GO:0003924 GTPase activity

ivity;GO:0016436 rRNA (uridine) methyltransferase activity;GO:0008649 rRNA methyltransfer

GO:0043138 3'-5' DNA helicase activity;GO:0004003 ATP-dependent DNA helicase activity

08483 transaminase activity;GO:0030170 pyridoxal phosphate binding

iosynthesis of amino acids; (sce01130)Biosynthesis of antibiotics

16891 endoribonuclease activity, producing 5'-phosphomonoesters;GO:0016893 endonuclease activity, second carbon oxidation, 2-oxoglutarate => oxaloacetate; (M00009)Citrate cycle (TCA cycle)  
reticulum  
inding;GO:0001135 RNA polymerase II transcription regulator recruiting activity;GO:000109  
tivity;GO:0015562 efflux transmembrane transporter activity;GO:0008519 ammonium transmembrane  
120)Ubiquitin mediated proteolysis  
3682 chromatin binding;GO:0005198 structural molecule activity

reclamation; (hsa04976)Bile secretion; (hsa04972)Pancreatic secretion  
003676 nucleic acid binding  
92 endoribonuclease activity, producing 3'-phosphomonoesters;GO:0004549 tRNA-specific ribonuclease  
s; (hsa05034)Alcoholism; (hsa05203)Viral carcinogenesis

lication; (sce03420)Nucleotide excision repair  
ism; (sce00190)Oxidative phosphorylation; (sce01110)Biosynthesis of secondary metabolites

674 molecular\_function  
e01100)Metabolic pathways  
0051185 coenzyme transmembrane transporter activity;GO:0015215 nucleotide transmembrane transporter  
activity;GO:0005092 GDP-dissociation inhibitor activity;GO:0005096 GTPase activator activity

idase activity;GO:0008237 metalloproteinase activity  
0005347 ATP transmembrane transporter activity;GO:0000295 adenine nucleotide transmembrane transporter

transferase activity, transferring alkyl or aryl (other than methyl) groups;GO:0016740 transferase  
activity;GO:0016833 oxo-acid-lyase activity;GO:0016830 carbon-carbon lyase activity  
g;GO:0043167 ion binding  
lism; (sce01100)Metabolic pathways  
0005198 structural molecule activity;GO:0003674 molecular\_function

aining complex scaffold activity;GO:0003682 chromatin binding  
ein complex binding;GO:0044877 protein-containing complex binding

09 kinase activator activity;GO:0019887 protein kinase regulator activity  
-deoxynucleotidase activity;GO:0008253 5'-nucleotidase activity  
ce04111)Cell cycle - yeast  
;GO:0004559 alpha-mannosidase activity;GO:0015923 mannosidase activity

UMP => UDP/UTP, CDP/CTP; (M00052)Pyrimidine ribonucleotide biosynthesis, UMP => UDP/UTP, CDP/CTP  
ity;GO:0015194 L-serine transmembrane transporter activity;GO:0005302 L-tyrosine transmembrane  
GO:0000293 ferric-chelate reductase activity;GO:0016723 oxidoreductase activity, oxidizing  
l-K4 specific);GO:0034647 histone demethylase activity (H3-trimethyl-K4 specific);GO:0032032  
ng;GO:0008092 cytoskeletal protein binding  
ty;GO:0022857 transmembrane transporter activity;GO:0005215 transporter activity  
rane cleaving;GO:0004190 aspartic-type endopeptidase activity;GO:0070001 aspartic-type peptidase  
;GO:0034212 peptide N-acetyltransferase activity;GO:0008080 N-acetyltransferase activity  
(sce03013)RNA transport  
tivity;GO:0008047 enzyme activator activity;GO:0030234 enzyme regulator activity  
-specific DNA binding;GO:0001158 enhancer sequence-specific DNA binding;GO:0035326 enhancer sequence-specific DNA binding

RNA polymerase II-specific;GO:0008270 zinc ion binding;GO:0043565 sequence-specific DNA binding; (sce01110)Biosynthesis of secondary metabolites; (sce01100)Metabolic pathways

674 molecular\_function

GO:0008525 phosphatidylcholine transporter activity;GO:0005548 phospholipid transporter activity;GO:0120013 intermembrane lipid transfer activity;GO:0015248 sterol transporter activity;GO:0005102 protein regulator activity;GO:0098772 molecular function regulator activity;GO:0005215 transporter activity;GO:0008135 translation factor activity, RNA binding;GO:0016887 ATPase activity

GO:0016783 sulfurtransferase activity;GO:0004725 protein tyrosine phosphatase activity

GO:0006725 purine metabolism; (sce00230)Purine metabolism; (sce01100)Metabolic pathways;GO:0032559 adenylyl ribonucleotide binding

[A-damaging agent MMS; the authentic, non-tagged protein is detected in highly purified mitochondria

(sce04141)Protein processing in endoplasmic reticulum;GO:0001228 DNA-binding transcription activator activity, RNA polymerase II-specific;GO:0006629 glycerolipid metabolism; (sce00010)Glycolysis / Gluconeogenesis;GO:0032454 histone demethylase activity (H3-K9 specific);GO:0032452 histone demethylase activity;GO:0046943 carboxylic acid transmembrane transporter activity;GO:0015293 symporter activity (H3-K14 specific);GO:0031078 histone deacetylase activity (H3-K14 specific);GO:0017136 Nucleosome assembly activity;GO:0001134 transcription regulator recruiting activity;GO:0008301 DNA replication; (hsa05231)Choline metabolism in cancer; (hsa04919)Thyroid hormone signaling pathway

Glutamine (+ PRPP) => UMP; (M00051)Uridine monophosphate biosynthesis, glutamine (+ PRPP) => UMP;GO:0016879 ligase activity, forming carbon-nitrogen bond;GO:0016879 ligase activity, forming carbon-nitrogen bond; (sce04138)Autophagy - yeast; (sce04113)Meiosis - yeast;GO:0000182 rDNA binding;GO:0032559 adenylyl ribonucleotide binding;GO:0005313 L-glutamate transmembrane transporter activity;GO:0015172 acidic amino acid transporter activity;GO:0003674 molecular\_function

GO:0014101 C1-unit interconversion, eukaryotes; (sce00460)Cyanoamino acid metabolism

GO:01901618 organic hydroxy compound transmembrane transporter activity;GO:0015238 drug transporter activity

GO:0019843 rRNA binding;GO:0003723 RNA binding;GO:0008175 tRNA methyltransferase activity;GO:0008173 tRNA methyltransferase activity;GO:0004866 endopeptidase inhibitor activity;GO:0061135 endopeptidase regulator activity

GO:0004440 Phosphonate and phosphinate metabolism; (M00090)Phosphatidylcholine metabolism;GO:0046943 carboxylic acid transmembrane transporter activity;GO:0008514 organic anion transporter activity

activity;GO:0003674 molecular\_function  
=> 2-oxoisocaproate; (M00432)Leucine biosynthesis, 2-oxoisovalerate => 2-oxoisocaproate;  
n; (sce)Leucine biosynthesis, 2-oxoisovalerate => 2-oxoisocaproate; (M00432)Leucine biosyn

0086)beta-Oxidation, acyl-CoA synthesis; (sce00061)Fatty acid biosynthesis

movement of ions, phosphorylative mechanism;GO:0042625 ATPase coupled ion transmembrane t

ter activity;GO:0046943 carboxylic acid transmembrane transporter activity;GO:0015238 dru  
0)Tyrosine metabolism; (sce00220)Arginine biosynthesis

ity;GO:0016435 rRNA (guanine) methyltransferase activity;GO:0016423 tRNA (guanine) methyl  
iosynthesis of secondary metabolites; (sce01100)Metabolic pathways

aminopeptidase activity;GO:0008235 metalloexopeptidase activity

sis - yeast

:0008106 alcohol dehydrogenase (NADP+) activity;GO:0004033 aldo-keto reductase (NADP) act  
tiple species; (sce04146)Peroxisome

hionine salvage pathway; (sce00270)Cysteine and methionine metabolism

236 serine-type peptidase activity;GO:0017171 serine hydrolase activity

ity;GO:0046943 carboxylic acid transmembrane transporter activity;GO:0008514 organic anio

733 peptide-lysine-N-acetyltransferase activity;GO:0034212 peptide N-acetyltransferase ac  
linositol binding;GO:0015248 sterol transporter activity

-K4 specific);GO:0032453 histone demethylase activity (H3-K4 specific);GO:0032452 histone

tivity;GO:0019707 protein-cysteine S-acyltransferase activity;GO:0031683 G-protein beta/g  
1100)Metabolic pathways

GO:0000293 ferric-chelate reductase activity;GO:0016723 oxidoreductase activity, oxidizin  
recruiting activity;GO:0001134 transcription regulator recruiting activity;GO:0000978 RNA

abolic pathways

e04070)Phosphatidylinositol signaling system; (sce04138)Autophagy - yeast

idylinositol binding;GO:0005543 phospholipid binding

ree-carbon compounds; (sce)Glycolysis, core module involving three-carbon compounds; (M00

ding, bending;GO:1990837 sequence-specific double-stranded DNA binding

tor activity;GO:0003779 actin binding

674 molecular\_function

binding;GO:0031072 heat shock protein binding

sce01130)Biosynthesis of antibiotics

:0031369 translation initiation factor binding;GO:0003729 mRNA binding

orter activity;GO:0015215 nucleotide transmembrane transporter activity;GO:0015605 organo

:0031369 translation initiation factor binding;GO:0003729 mRNA binding

ase activity;GO:0004725 protein tyrosine phosphatase activity;GO:0004721 phosphoprotein p  
ne metabolism; (hsa01100)Metabolic pathways  
etabolism; (sce01110)Biosynthesis of secondary metabolites; (sce01100)Metabolic pathways  
0:1901981 phosphatidylinositol phosphate binding;GO:0035091 phosphatidylinositol binding

sce01130)Biosynthesis of antibiotics

1630 ubiquitin protein ligase activity;GO:0061659 ubiquitin-like protein ligase activity  
l to contain an N-terminal transmembrane domain; osw5 null mutant spores exhibit increased  
ity;GO:0016427 tRNA (cytosine) methyltransferase activity;GO:0008175 tRNA methyltransfera

6298 lipase activity;GO:0016788 hydrolase activity, acting on ester bonds

ein complex binding;GO:0044877 protein-containing complex binding

ce-specific DNA binding;GO:0000987 proximal promoter sequence-specific DNA binding;GO:000  
cle - yeast; (sce04113)Meiosis - yeast

0005548 phospholipid transporter activity;GO:0005319 lipid transporter activity

3676 nucleic acid binding

ity;GO:0071077 adenosine 3',5'-bisphosphate transmembrane transporter activity;GO:0000295

04730 pseudouridylate synthase activity;GO:0009982 pseudouridine synthase activity

binding;GO:0001025 RNA polymerase III transcription factor binding;GO:0000995 RNA polymer

dase activity, acting on L-amino acid peptides;GO:0008233 peptidase activity

species; (sce04111)Cell cycle - yeast

e protein binding;GO:0051082 unfolded protein binding

ty;GO:0015175 neutral amino acid transmembrane transporter activity;GO:0015179 L-amino ac

etabolic pathways

ribonucleoprotein complex binding;GO:0008270 zinc ion binding

198 structural molecule activity;GO:0003674 molecular\_function

specific);GO:0010484 H3 histone acetyltransferase activity;GO:0004402 histone acetyltran  
inine biosynthesis; (sce00250)Alanine, aspartate and glutamate metabolism

051500 D-tyrosyl-tRNA(Tyr) deacylase activity;GO:0051499 D-aminoacyl-tRNA deacylase activ

ein complex binding;GO:0044877 protein-containing complex binding

GO:0008649 rRNA methyltransferase activity;GO:0140102 catalytic activity, acting on a rRN

> THF; (sce)Tetrahydrofolate biosynthesis, GTP => THF; (sce00790)Folate biosynthesis

sce01130)Biosynthesis of antibiotics; (sce01110)Biosynthesis of secondary metabolites

doplasmic reticulum; (sce00062)Fatty acid elongation; (sce01040)Biosynthesis of unsaturat

nsferase activity, transferring amino-acyl groups;GO:0016746 transferase activity, transf

ular function regulator;GO:0003674 molecular\_function

:0017150 tRNA dihydrouridine synthase activity;GO:0016627 oxidoreductase activity, acting

9 ubiquitin-like protein ligase binding;GO:0019899 enzyme binding

3676 nucleic acid binding

20)Sulfur metabolism; (sce00270)Cysteine and methionine metabolism  
xidoreductase activity, acting on a heme group of donors, oxygen as acceptor;GO:0015002 h  
osphatase activity;GO:0016462 pyrophosphatase activity  
lyoxylate and dicarboxylate metabolism; (sce01100)Metabolic pathways

multiple species; (sce04146)Peroxisome  
binding;GO:0005488 binding  
ity;GO:0015037 peptide disulfide oxidoreductase activity;GO:0015035 protein disulfide oxi  
ansferase activity, transferring hexosyl groups;GO:0016757 transferase activity, transfer  
GO:0008525 phosphatidylcholine transporter activity;GO:0005548 phospholipid transporter a  
some  
hosphatidylinositol-3,5-bisphosphate binding;GO:0032266 phosphatidylinositol-3-phosphate

e metabolism; (hsa01200)Carbon metabolism; (hsa01100)Metabolic pathways  
reticulum

dine tract binding;GO:0003727 single-stranded RNA binding  
nding;GO:0000976 transcription regulatory region sequence-specific DNA binding;GO:1990837  
rotein deacetylase activity;GO:0019213 deacetylase activity

e regulator activity;GO:0005085 guanyl-nucleotide exchange factor activity

g;GO:0001069 regulatory region RNA binding;GO:0003729 mRNA binding  
tamine (+ PRPP) => UMP; (M00051)Uridine monophosphate biosynthesis, glutamine (+ PRPP) =>

ament binding;GO:0003779 actin binding

0019212 phosphatase inhibitor activity;GO:0019888 protein phosphatase regulator activity  
3676 nucleic acid binding  
transporter activity;GO:0015079 potassium ion transmembrane transporter activity;GO:00468

vity;GO:0005088 Ras guanyl-nucleotide exchange factor activity;GO:0017048 Rho GTPase bind  
061711 N(6)-L-threonylcarbamoyladenine synthase activity;GO:0043047 single-stranded telom  
ular adaptor activity;GO:0005515 protein binding  
aining complex binding;GO:0005488 binding  
vity;GO:0005384 manganese ion transmembrane transporter activity;GO:0015295 solute:proton

nologous recombination; (sce03430)Mismatch repair  
signaling pathway - yeast  
nding;GO:0000976 transcription regulatory region sequence-specific DNA binding;GO:1990837  
tive phase, fructose 6P => ribose 5P; (sce)Pentose phosphate pathway, non-oxidative phase  
erine => cysteine; (M00338)Cysteine biosynthesis, homocysteine + serine => cysteine; (sce)

;GO:0051082 unfolded protein binding;GO:0016887 ATPase activity  
hsa04142)Lysosome

ce-specific DNA binding;GO:0000987 proximal promoter sequence-specific DNA binding;GO:000

9 ubiquitin-like protein ligase binding;GO:0019899 enzyme binding  
 lymerase II activating transcription factor binding;GO:0008094 DNA-dependent ATPase activ  
 g;GO:1901363 heterocyclic compound binding  
 )Metabolic pathways  
 :0070004 cysteine-type exopeptidase activity;GO:1990380 Lys48-specific deubiquitinase act  
 ce01110)Biosynthesis of secondary metabolites; (sce01100)Metabolic pathways  
  
 )Glycerophospholipid metabolism; (sce01110)Biosynthesis of secondary metabolites  
 y;GO:0072509 divalent inorganic cation transmembrane transporter activity;GO:0046915 tran  
  
 ity;GO:0015194 L-serine transmembrane transporter activity;GO:0005302 L-tyrosine transmem  
  
 i strain has a sporulation defect characterized by elevated dityrosine in the soluble frac  
 0)Mismatch repair; (sce03030)DNA replication  
  
 GO:0003723 RNA binding  
  
 RNA methyltransferase activity;GO:0140101 catalytic activity, acting on a tRNA  
  
 0:0004672 protein kinase activity;GO:0016773 phosphotransferase activity, alcohol group a  
 3676 nucleic acid binding  
 ity;GO:0071916 dipeptide transmembrane transporter activity;GO:0035673 oligopeptide trans  
  
 3420)Nucleotide excision repair  
 de binding;GO:0032561 guanyl ribonucleotide binding  
 757 S-adenosylmethionine-dependent methyltransferase activity;GO:0008168 methyltransferas  
  
 aminopeptidase activity;GO:0008235 metalloexopeptidase activity  
 ing;GO:0043168 anion binding  
  
 3676 nucleic acid binding  
  
  
 on initiation factor activity;GO:0004386 helicase activity  
  
 ar\_function  
  
  
 tive phase, fructose 6P => ribose 5P; (sce)Pentose phosphate pathway, non-oxidative phase  
 tive phase, fructose 6P => ribose 5P; (sce)Pentose phosphate pathway, non-oxidative phase  
 fic DNA binding;GO:0046914 transition metal ion binding  
 4-hydroxybenzoate => ubiquinone; (sce)Ubiquinone biosynthesis, eukaryotes, 4-hydroxybenz  
  
  
  
 c double-stranded DNA binding;GO:0003690 double-stranded DNA binding  
 activity;GO:0000149 SNARE binding  
  
 > THF; (sce)Tetrahydrofolate biosynthesis, GTP => THF; (sce00790)Folate biosynthesis  
 03674 molecular\_function

reticulum

0:0010181 FMN binding;G0:0016655 oxidoreductase activity, acting on NAD(P)H, quinone or s  
A replication; (sce03420)Nucleotide excision repair

139 metal ion:proton antiporter activity;G0:0015386 potassium:proton antiporter activity  
)Glycerophospholipid metabolism; (sce01110)Biosynthesis of secondary metabolites

vity;G0:0005384 manganese ion transmembrane transporter activity;G0:0015295 solute:proton

712 transcription coregulator activity;G0:0000981 DNA-binding transcription factor activi

sce01110)Biosynthesis of secondary metabolites

hatidylinositol-3,4-bisphosphate binding;G0:0080025 phosphatidylinositol-3,5-bisphosphate

ferase activity;G0:0008168 methyltransferase activity;G0:0016741 transferase activity, tr

RNA polymerase II-specific;G0:0008270 zinc ion binding;G0:0043565 sequence-specific DNA

ated in highly purified mitochondria in high-throughput studies

g;G0:0043167 ion binding

0:0070273 phosphatidylinositol-4-phosphate binding;G0:1901981 phosphatidylinositol phosph

3676 nucleic acid binding

nthesis of secondary metabolites; (sce01100)Metabolic pathways

ce04111)Cell cycle - yeast; (sce04113)Meiosis - yeast

g;G0:0005515 protein binding;G0:0005488 binding

4-hydroxybenzoate => ubiquinone; (sce)Ubiquinone biosynthesis, eukaryotes, 4-hydroxybenz  
ce04111)Cell cycle - yeast

-anchor biosynthesis; (sce01100)Metabolic pathways

ansporter activity;G0:0051724 NAD transmembrane transporter activity;G0:0050833 pyruvate

ty;G0:0005198 structural molecule activity;G0:0003676 nucleic acid binding

ree-carbon compounds; (sce)Glycolysis, core module involving three-carbon compounds; (M00

ion channel activity;G0:0022829 wide pore channel activity

oups;G0:0016740 transferase activity;G0:0003824 catalytic activity

tiple species

0086)beta-Oxidation, acyl-CoA synthesis; (sce00061)Fatty acid biosynthesis

0:0004672 protein kinase activity;G0:0016773 phosphotransferase activity, alcohol group a

4720)Long-term potentiation; (hsa04972)Pancreatic secretion

712 transcription coregulator activity;G0:0140110 transcription regulator activity

-anchor biosynthesis; (sce01100)Metabolic pathways

:0008134 transcription factor binding;G0:0005515 protein binding

kinase activity;G0:0010857 calcium-dependent protein kinase activity;G0:0004683 calmodul



esis; (sce01100)Metabolic pathways  
ce-specific DNA binding;GO:0000987 proximal promoter sequence-specific DNA binding;GO:000  
crotubule binding;GO:0015631 tubulin binding

0000030 mannosyltransferase activity;GO:0016758 transferase activity, transferring hexosyl  
2-oxoglutarate => oxaloacetate; (M00009)Citrate cycle (TCA cycle, Krebs cycle); (M00011)C

sporter activity;GO:0015165 pyrimidine nucleotide-sugar transmembrane transporter activity  
inhibitor activity;GO:0003785 actin monomer binding  
nding transcription factor recruiting activity;GO:0061629 RNA polymerase II sequence-spec  
hatase activity;GO:0004724 magnesium-dependent protein serine/threonine phosphatase activ  
6887 ATPase activity;GO:0017111 nucleoside-triphosphatase activity  
cription elongation factor complex;GO:0019908 nuclear cyclin-dependent protein kinase hol

lism; (sce01100)Metabolic pathways

ein complex binding;GO:0044877 protein-containing complex binding

ity;GO:0008028 monocarboxylic acid transmembrane transporter activity;GO:0090482 vitamin  
198 structural molecule activity;GO:0003674 molecular\_function

2-oxoglutarate => oxaloacetate; (M00009)Citrate cycle (TCA cycle, Krebs cycle); (M00011)C  
amate metabolism

se activity;GO:0016799 hydrolase activity, hydrolyzing N-glycosyl compounds;GO:0016791 ph  
5198 structural molecule activity;GO:0003674 molecular\_function  
hagy - yeast

0019208 phosphatase regulator activity;GO:0030234 enzyme regulator activity

e regulator activity;GO:0008565 protein transporter activity  
crotubule binding;GO:0015631 tubulin binding  
activity;GO:0003674 molecular\_function  
)Valine, leucine and isoleucine degradation; (sce00340)Histidine metabolism  
-ligase activity;GO:0016878 acid-thiol ligase activity

ein complex binding;GO:0003729 mRNA binding  
0005402 carbohydrate:cation symporter activity;GO:0015295 solute:proton symporter activit

44390 ubiquitin-like protein conjugating enzyme binding;GO:0043130 ubiquitin binding

sce01110)Biosynthesis of secondary metabolites  
5)N-glycan precursor biosynthesis; (sce00510)N-Glycan biosynthesis  
lism

crotubule binding;GO:0015631 tubulin binding

NA binding;GO:0046872 metal ion binding

Metabolic pathways

ein complex binding;G0:0003729 mRNA binding  
arch and sucrose metabolism; (sce01100)Metabolic pathways  
NA binding;G0:0046872 metal ion binding

tivity;G0:0033549 MAP kinase phosphatase activity;G0:0004724 magnesium-dependent protein  
tivity;G0:0030291 protein serine/threonine kinase inhibitor activity;G0:0004860 protein k  
is

733 peptide-lysine-N-acetyltransferase activity;G0:0034212 peptide N-acetyltransferase ac  
lycerol degradation; (sce00561)Glycerolipid metabolism  
ansport  
sitol-4, 5-bisphosphate binding;G0:1902936 phosphatidylinositol bisphosphate binding  
sis - yeast

al ion binding;G0:0046872 metal ion binding  
g;G0:1901363 heterocyclic compound binding

215 transporter activity;G0:0003674 molecular\_function

0032550 purine ribonucleoside binding  
:0033677 DNA/RNA helicase activity;G0:0008026 ATP-dependent helicase activity  
198 structural molecule activity;G0:0003674 molecular\_function  
UMP => UDP/UTP, CDP/CTP; (M00052)Pyrimidine ribonucleotide biosynthesis, UMP => UDP/UTP, C

ine and methionine metabolism; (sce01200)Carbon metabolism

reticulum

lecular\_function  
l acid-amino acid ligase activity;G0:0016879 ligase activity, forming carbon-nitrogen bon  
reticulum  
etal ion binding;G0:0046872 metal ion binding  
e01100)Metabolic pathways

vity;G0:0005313 L-glutamate transmembrane transporter activity;G0:0015172 acidic amino ac  
reticulum  
G0:0140110 transcription regulator activity;G0:0003674 molecular\_function  
idase activity;G0:0008237 metalloproteinase activity  
G0:0043139 5'-3' DNA helicase activity;G0:0004003 ATP-dependent DNA helicase activity

0019787 ubiquitin-like protein transferase activity;G0:0140096 catalytic activity, acting  
G0:0015036 disulfide oxidoreductase activity;G0:0016667 oxidoreductase activity, acting o  
hagy - yeast

phan biosynthesis; (sce01130)Biosynthesis of antibiotics; (sce01110)Biosynthesis of secon

some

.s with Skp1p and Cdc53p; YLR352W is not an essential gene

yeast

ase activity;GO:0004197 cysteine-type endopeptidase activity;GO:0008234 cysteine-type pep

00)Metabolic pathways

ity;GO:0003682 chromatin binding

ity;GO:0046915 transition metal ion transmembrane transporter activity;GO:0046873 metal i

RNA polymerase II-specific;GO:0046983 protein dimerization activity;GO:0003700 DNA-bindin

yase activity;GO:0016835 carbon-oxygen lyase activity

tivity;GO:0003674 molecular\_function

aling pathway - yeast; (sce04111)Cell cycle - yeast

43 thiol-dependent ubiquitin-specific protease activity;GO:0036459 thiol-dependent ubiqui

ity;GO:0016436 rRNA (uridine) methyltransferase activity;GO:0008649 rRNA methyltransferas

NA binding;GO:0043022 ribosome binding

;GO:0042626 ATPase activity, coupled to transmembrane movement of substances;GO:1904680 p

inding;GO:0008092 cytoskeletal protein binding

nine, aspartate and glutamate metabolism; (sce01230)Biosynthesis of amino acids

0:1901981 phosphatidylinositol phosphate binding;GO:0005085 guanyl-nucleotide exchange fa

GO:0043139 5'-3' DNA helicase activity;GO:0010521 telomerase inhibitor activity

g;GO:1901363 heterocyclic compound binding

lecular\_function

75 RNA polymerase core enzyme binding;GO:0001099 basal RNA polymerase II transcription ma

ter activity;GO:0008028 monocarboxylic acid transmembrane transporter activity;GO:0015605

00141)C1-unit interconversion, eukaryotes; (sce00670)One carbon pool by folate

ed DNA binding;GO:0003697 single-stranded DNA binding

0:0016899 oxidoreductase activity, acting on the CH-OH group of donors, oxygen as accepto

e activity;GO:0036459 thiol-dependent ubiquitinyl hydrolase activity;GO:0004197 cysteine-

5 transferase activity, transferring alkyl or aryl (other than methyl) groups;GO:0016740  
 g;GO:0043167 ion binding  
 ne metabolism; (sce00230)Purine metabolism  
 ) methyltransferase activity;GO:0051908 double-stranded DNA 5'-3' exodeoxyribonuclease ac  
 ption  
 ing;GO:1902936 phosphatidylinositol biphosphate binding;GO:1901981 phosphatidylinositol  
  
 0:0035184 histone threonine kinase activity;GO:0035173 histone kinase activity  
 00)Metabolic pathways  
  
 e regulator activity;GO:0060589 nucleoside-triphosphatase regulator activity  
  
 e; (M00074)N-glycan biosynthesis, high-mannose type; (sce00513)Various types of N-glycan  
 etallopeptidase activity;GO:0004175 endopeptidase activity  
 RNA polymerase II-specific;GO:0008270 zinc ion binding;GO:0043565 sequence-specific DNA  
 0:0004672 protein kinase activity;GO:0016773 phosphotransferase activity, alcohol group a  
 sis - yeast  
  
 ce-specific DNA binding;GO:0000987 proximal promoter sequence-specific DNA binding;GO:000  
  
 733 peptide-lysine-N-acetyltransferase activity;GO:0034212 peptide N-acetyltransferase ac  
 reticulum  
  
 nzyme inhibitor activity;GO:0008047 enzyme activator activity  
 712 transcription coregulator activity;GO:0140110 transcription regulator activity  
  
 8186 RNA-dependent ATPase activity;GO:0003724 RNA helicase activity  
  
 activity;GO:0004520 endodeoxyribonuclease activity;GO:0004536 deoxyribonuclease activity  
  
 198 structural molecule activity;GO:0003674 molecular\_function  
 species; (sce04111)Cell cycle - yeast; (sce04113)Meiosis - yeast  
  
 activity;GO:0015171 amino acid transmembrane transporter activity;GO:0046943 carboxylic  
 ce-specific DNA binding;GO:0000987 proximal promoter sequence-specific DNA binding;GO:000  
  
 producing 3' uridine cyclic phosphate ends;GO:0000175 3'-5'-exoribonuclease activity;GO:  
  
 (sce03013)RNA transport  
 5198 structural molecule activity;GO:0003674 molecular\_function  
 ity;GO:0032575 ATP-dependent 5'-3' RNA helicase activity;GO:0033678 5'-3' DNA/RNA helicase  
 etylase binding;GO:0003682 chromatin binding  
  
  
 hosphatase activity;GO:0016462 pyrophosphatase activity  
 g;GO:0005488 binding  
  
 etal ion binding;GO:0046872 metal ion binding

pendent ATPase activity;GO:0042623 ATPase activity, coupled  
hagy - yeast  
cle; (sce00630)Glyoxylate and dicarboxylate metabolism  
s; (hsa04210)Apoptosis

ding;GO:0000978 RNA polymerase II proximal promoter sequence-specific DNA binding;GO:0000  
minus-end-directed;GO:1990939 ATP-dependent microtubule motor activity;GO:0003777 microtu

e-phosphate deaminase activity;GO:0016814 hydrolase activity, acting on carbon-nitrogen (c  
etic complications; (sce04011)MAPK signaling pathway - yeast; (sce04111)Cell cycle - yeast  
multiple species; (sce04146)Peroxisome

08)Ribosome biogenesis in eukaryotes; (sce03013)RNA transport  
atty acid degradation  
, heme protein as acceptor;GO:0051537 2 iron, 2 sulfur cluster binding;GO:0051536 iron-su

se II proximal promoter sequence-specific DNA binding;GO:0000987 proximal promoter sequen  
hagy - yeast  
tivity;GO:0046873 metal ion transmembrane transporter activity;GO:0022890 inorganic catio  
(hsa04141)Protein processing in endoplasmic reticulum  
sferase activity, transferring one-carbon groups;GO:0003735 structural constituent of rib  
RNA polymerase II-specific;GO:0008270 zinc ion binding;GO:0043565 sequence-specific DNA  
itin-protein transferase activity;GO:0060090 molecular adaptor activity

00)Metabolic pathways  
olic pathways  
0004661 protein geranylgeranyltransferase activity;GO:0008318 protein prenyltransferase a  
e01100)Metabolic pathways  
;GO:0016616 oxidoreductase activity, acting on the CH-OH group of donors, NAD or NADP as  
NA binding;GO:0046872 metal ion binding  
03674 molecular\_function

oups;GO:0003723 RNA binding;GO:0016740 transferase activity

00)Metabolic pathways  
al ion binding;GO:0046872 metal ion binding  
3676 nucleic acid binding  
g;GO:0003676 nucleic acid binding  
sce00520)Amino sugar and nucleotide sugar metabolism; (sce01130)Biosynthesis of antibioti  
specific DNA binding;GO:0003677 DNA binding  
ce04111)Cell cycle - yeast; (sce04113)Meiosis - yeast  
005048 signal sequence binding;GO:0008565 protein transporter activity

factor binding;GO:0033613 activating transcription factor binding;GO:0001085 RNA polymer  
 ce-specific DNA binding;GO:0000987 proximal promoter sequence-specific DNA binding;GO:000  
  
 0008135 translation factor activity, RNA binding;GO:0003924 GTPase activity  
 lochaperone activity;GO:0140104 molecular carrier activity  
  
 ce04111)Cell cycle – yeast; (sce04113)Meiosis – yeast  
 89 carboxylic ester hydrolase activity;GO:0016788 hydrolase activity, acting on ester bon  
  
 712 transcription coregulator activity;GO:0140110 transcription regulator activity  
 clathrin heavy chain binding;GO:0005546 phosphatidylinositol-4,5-bisphosphate binding  
  
 s; (hsa05034)Alcoholism  
  
 ein complex binding;GO:0044877 protein-containing complex binding  
  
 03674 molecular\_function  
  
  
 ree-carbon compounds; (sce)Glycolysis, core module involving three-carbon compounds; (M00  
  
 ce04141)Protein processing in endoplasmic reticulum  
  
 00083)Fatty acid biosynthesis, elongation; (sce00780)Biotin metabolism  
 514 DNA demethylase activity;GO:0031543 peptidyl-proline dioxygenase activity  
  
 nsporter activity;GO:0015301 anion:anion antiporter activity;GO:0015116 sulfate transmemb  
  
 activity;GO:0140097 catalytic activity, acting on DNA  
 00)Metabolic pathways  
 helicase activity;GO:0004386 helicase activity  
 hionine salvage pathway; (sce00270)Cysteine and methionine metabolism  
  
 3676 nucleic acid binding  
  
  
 dipeptidase activity;GO:0008242 omega peptidase activity  
 inding;GO:0001135 RNA polymerase II transcription regulator recruiting activity;GO:000109  
 ;GO:0060590 ATPase regulator activity;GO:0051087 chaperone binding  
 00082)Fatty acid biosynthesis, initiation; (sce00061)Fatty acid biosynthesis  
  
 binding;GO:0003676 nucleic acid binding  
  
  
 ity, acting on ester bonds;GO:0016787 hydrolase activity  
 A binding;GO:0003723 RNA binding

kinase regulator activity;G0:0019887 protein kinase regulator activity;G0:0019207 kinase  
198 structural molecule activity;G0:0003674 molecular\_function  
;G0:0005488 binding

sis - yeast  
ity;G0:0000297 spermine transmembrane transporter activity;G0:0015203 polyamine transmembr  
tein tyrosine phosphatase activity;G0:0004721 phosphoprotein phosphatase activity  
0032550 purine ribonucleoside binding

ein complex binding;G0:0044877 protein-containing complex binding

ce04111)Cell cycle - yeast  
ity;G0:0016436 rRNA (uridine) methyltransferase activity;G0:0008649 rRNA methyltransferas

hagy - yeast

nsferase; (sce)N-glycosylation by oligosaccharyltransferase; (sce00510)N-Glycan biosynthe  
ne; (M00026)Histidine biosynthesis, PRPP => histidine; (sce00340)Histidine metabolism

198 structural molecule activity;G0:0003674 molecular\_function  
nding;G0:0008092 cytoskeletal protein binding

-anchor biosynthesis; (sce01100)Metabolic pathways  
g;G0:0043167 ion binding  
ator activity;G0:0030695 GTPase regulator activity

reticulum  
:0017150 tRNA dihydrouridine synthase activity;G0:0016627 oxidoreductase activity, acting

nsferase; (sce)N-glycosylation by oligosaccharyltransferase; (sce00510)N-Glycan biosynthe  
vity;G0:0015299 solute:proton antiporter activity;G0:0015298 solute:cation antiporter act

0015215 nucleotide transmembrane transporter activity;G0:0051184 cofactor transmembrane t  
5198 structural molecule activity;G0:0003674 molecular\_function  
ylpyrimidine kinase activity;G0:0008902 hydroxymethylpyrimidine kinase activity  
ty acid degradation; (sce00010)Glycolysis / Gluconeogenesis  
ity;G0:0008251 tRNA-specific adenosine deaminase activity;G0:0004000 adenosine deaminase  
rsions; (sce01100)Metabolic pathways

00)Metabolic pathways

osphatase activity;GO:0106018 phosphatidylinositol-3,5-bisphosphate phosphatase activity;

ic compound binding;GO:0097159 organic cyclic compound binding

single-stranded DNA binding;GO:1990837 sequence-specific double-stranded DNA binding

GO:0034458 3'-5' RNA helicase activity;GO:0004004 ATP-dependent RNA helicase activity

RNA polymerase II-specific;GO:0008270 zinc ion binding;GO:0043565 sequence-specific DNA  
-phosphatase activity;GO:0034594 phosphatidylinositol trisphosphate phosphatase activity;

44390 ubiquitin-like protein conjugating enzyme binding;GO:0061630 ubiquitin protein liga

ing;GO:0001042 RNA polymerase I core binding;GO:0001181 RNA polymerase I general transcri  
e; (M00074)N-glycan biosynthesis, high-mannose type; (sce00513)Various types of N-glycan  
3676 nucleic acid binding

198 structural molecule activity;GO:0003674 molecular\_function

ng;GO:0016887 ATPase activity

;GO:0042895 antibiotic transmembrane transporter activity;GO:0008028 monocarboxylic acid

674 molecular\_function

doplasmic reticulum; (sce00062)Fatty acid elongation; (sce01040)Biosynthesis of unsaturat  
fic DNA binding;GO:0046914 transition metal ion binding

clathrin heavy chain binding;GO:0005546 phosphatidylinositol-4,5-bisphosphate binding

binding;GO:0060090 molecular adaptor activity

) activity;GO:0016884 carbon-nitrogen ligase activity, with glutamine as amido-N-donor;GO

cellular part

ating projection tip

etabolism

se activity;GO:0042171 lysophosphatidic acid acyltransferase activity;GO:0016411 acylglyc

1990189 peptide-serine-N-acetyltransferase activity;GO:0010485 H4 histone acetyltransfera  
ce04141)Protein processing in endoplasmic reticulum

embrane transporter activity;GO:0015291 secondary active transmembrane transporter activi

g;GO:1901363 heterocyclic compound binding

674 molecular\_function

(sce03013)RNA transport

reticulum

n binding;GO:0005488 binding

GO:0005515 protein binding

tryptophan; (M00023)Tryptophan biosynthesis, chorismate => tryptophan; (sce00400)Phenylala  
42623 ATPase activity, coupled;GO:0016887 ATPase activity

ity;GO:0000979 RNA polymerase II core promoter sequence-specific DNA binding;GO:0001046 c



factor binding;GO:0070491 repressing transcription factor binding;GO:0001085 RNA polymer

:0042123 glucanosyltransferase activity;GO:0016740 transferase activity

thesis, PA => PS => PE; (sce)Phosphatidylethanolamine (PE) biosynthesis, PA => PS => PE;

712 transcription coregulator activity;GO:0140110 transcription regulator activity

3676 nucleic acid binding

; (sce00514)Other types of O-glycan biosynthesis; (sce01100)Metabolic pathways

e regulator activity;GO:0098772 molecular function regulator

lication; (sce03420)Nucleotide excision repair

198 structural molecule activity;GO:0003674 molecular\_function

0662 coenzyme binding;GO:0048037 cofactor binding

5198 structural molecule activity;GO:0003674 molecular\_function

0005543 phospholipid binding;GO:0008289 lipid binding

ein complex binding;GO:0044877 protein-containing complex binding

nscription corepressor activity;GO:0003712 transcription coregulator activity

n binding;GO:0005488 binding

itin-like protein transferase activity;GO:0140096 catalytic activity, acting on a protein

osine degradation; (sce00600)Sphingolipid metabolism

008139 nuclear localization sequence binding;GO:0098847 sequence-specific single stranded

choline => PC; (M00090)Phosphatidylcholine (PC) biosynthesis, choline => PC; (sce00564)Gl  
osine degradation; (sce00600)Sphingolipid metabolism

3676 nucleic acid binding

tein binding;GO:0004842 ubiquitin-protein transferase activity

ferase activity;GO:0008168 methyltransferase activity;GO:0016741 transferase activity, tr

y;GO:0046915 transition metal ion transmembrane transporter activity;GO:0046873 metal ion  
bolism; (hsa00030)Pentose phosphate pathway; (hsa01200)Carbon metabolism

ated in highly purified mitochondria in high-throughput studies; YBL059W has a paralog, YE

activity;GO:0015297 antiporter activity;GO:0015932 nucleobase-containing compound transm

ity;GO:0016423 tRNA (guanine) methyltransferase activity;GO:0008175 tRNA methyltransferas  
H2 groups, NAD or NADP as acceptor;GO:0016725 oxidoreductase activity, acting on CH or CH

ituent of cytoskeleton;GO:0017111 nucleoside-triphosphatase activity

e regulator activity;G0:0060589 nucleoside-triphosphatase regulator activity  
ity;G0:0005381 iron ion transmembrane transporter activity;G0:0046915 transition metal io

ein complex binding;G0:0044877 protein-containing complex binding  
8 phospholipid transporter activity;G0:0005319 lipid transporter activity  
cific DNA binding;G0:0001163 RNA polymerase I regulatory region sequence-specific DNA bin  
e01100)Metabolic pathways  
smatch repair; (sce03030)DNA replication

etabolism

733 peptide-lysine-N-acetyltransferase activity;G0:0034212 peptide N-acetyltransferase ac  
prolyl cis-trans isomerase activity;G0:0016859 cis-trans isomerase activity

minopeptidase activity;G0:0008238 exopeptidase activity

198 structural molecule activity;G0:0003674 molecular\_function

0:1901981 phosphatidylinositol phosphate binding;G0:0035091 phosphatidylinositol binding  
rotein phosphatase regulator activity;G0:0019903 protein phosphatase binding

ter activity;G0:0008028 monocarboxylic acid transmembrane transporter activity;G0:0015605

reticulum

ce04111)Cell cycle - yeast; (sce04113)Meiosis - yeast  
-anchor biosynthesis; (sce01100)Metabolic pathways

061650 ubiquitin-like protein conjugating enzyme activity;G0:0004842 ubiquitin-protein tr  
5198 structural molecule activity;G0:0046983 protein dimerization activity

ne; (M00026)Histidine biosynthesis, PRPP => histidine; (sce00340)Histidine metabolism  
ter activity;G0:0046943 carboxylic acid transmembrane transporter activity;G0:0008514 org  
250)Alanine, aspartate and glutamate metabolism; (sce01110)Biosynthesis of secondary metal  
e regulator activity;G0:0051879 Hsp90 protein binding

binding;G0:0003677 DNA binding

G0:0000293 ferric-chelate reductase activity;G0:0016723 oxidoreductase activity, oxidizin  
ty;G0:0005516 calmodulin binding;G0:0004674 protein serine/threonine kinase activity

> THF; (sce)Tetrahydrofolate biosynthesis, GTP => THF; (sce00790)Folate biosynthesis  
ing;G0:0003682 chromatin binding  
tiple species; (sce00230)Purine metabolism; (sce04113)Meiosis - yeast

etic complications; (sce04213)Longevity regulating pathway - multiple species; (sce04138).  
ide kinase activity;G0:0019205 nucleobase-containing compound kinase activity

PRPP + glutamine => IMP; (sce)Inosine monophosphate biosynthesis, PRPP + glutamine => IMP  
idylinositol binding;G0:0005543 phospholipid binding

ne; (M00026)Histidine biosynthesis, PRPP => histidine; (sce00340)Histidine metabolism

e regulator activity;G0:0060589 nucleoside-triphosphatase regulator activity

nction

ate => H<sub>2</sub>S; (sce)Assimilatory sulfate reduction, sulfate => H<sub>2</sub>S; (sce00920)Sulfur metabolism,  
acting on carbon-nitrogen (but not peptide) bonds, in nitriles;G0:0016810 hydrolase  
004674 protein serine/threonine kinase activity;G0:0019901 protein kinase binding  
g;G0:0003723 RNA binding  
ctivity;G0:0004713 protein tyrosine kinase activity;G0:0004674 protein serine/threonine kinase  
674 molecular\_function

0521 telomerase inhibitor activity;G0:0043047 single-stranded telomeric DNA binding  
cription corepressor activity;G0:0005543 phospholipid binding  
lap endonuclease activity;G0:0016888 endodeoxyribonuclease activity, producing 5'-phosphorylated  
filament binding;G0:0003779 actin binding

20)Sulfur metabolism; (sce00270)Cysteine and methionine metabolism

reticulum

G0:0005261 cation channel activity;G0:0022839 ion gated channel activity  
y;G0:0015174 basic amino acid transmembrane transporter activity;G0:0015171 amino acid transporter  
G0:0008525 phosphatidylcholine transporter activity;G0:0031210 phosphatidylcholine binding

recruiting activity;G0:0000979 RNA polymerase II core promoter sequence-specific DNA binding  
is

transporter activity;G0:0003674 molecular\_function

three-carbon compounds; (sce)Glycolysis, core module involving three-carbon compounds; (M000000)  
ructose 6-phosphate 1,6-bisphosphate lyase activity;G0:0016836 hydro-lyase activity;G0:0016835 carbon-oxygen lyase activity  
6791 phosphatase activity;G0:0042578 phosphoric ester hydrolase activity  
0008135 translation factor activity, RNA binding;G0:0003729 mRNA binding  
in processing in endoplasmic reticulum; (sce03013)RNA transport

13)Meiosis – yeast

:0031369 translation initiation factor binding;GO:0003729 mRNA binding

etallopeptidase activity;GO:0004175 endopeptidase activity

e regulator activity;GO:0060589 nucleoside-triphosphatase regulator activity

nsporter activity;GO:0015196 L-tryptophan transmembrane transporter activity;GO:0015173 a  
sce00240)Pyrimidine metabolism; (sce01100)Metabolic pathways

ne metabolism; (sce00230)Purine metabolism

itor activity;GO:0072542 protein phosphatase activator activity;GO:0019211 phosphatase ac

NA-binding transcription factor activity;GO:0140110 transcription regulator activity

; (sce01110)Biosynthesis of secondary metabolites; (sce01100)Metabolic pathways

-anchor biosynthesis; (sce01100)Metabolic pathways

etabolic pathways

NA-binding transcription factor activity;GO:0140110 transcription regulator activity

sm; (sce01110)Biosynthesis of secondary metabolites; (sce01100)Metabolic pathways

0:1901981 phosphatidylinositol phosphate binding;GO:0035091 phosphatidylinositol binding

e01130)Biosynthesis of antibiotics; (sce01100)Metabolic pathways

GO:0043021 ribonucleoprotein complex binding

198 structural molecule activity;GO:0003674 molecular\_function

pholipase activity;GO:0016298 lipase activity

215 transporter activity;GO:0003674 molecular\_function

;GO:0051020 GTPase binding;GO:0008270 zinc ion binding

ated in highly purified mitochondria in high-throughput studies

nding;GO:0032559 adenylyl ribonucleotide binding

ein complex binding;GO:0044877 protein-containing complex binding

species; (sce04011)MAPK signaling pathway – yeast

0003924 GTPase activity;GO:0005525 GTP binding

110 transcription regulator activity;GO:0003674 molecular\_function

198 structural molecule activity;GO:0003674 molecular\_function

orter activity;GO:0015169 glycerol-3-phosphate transmembrane transporter activity;GO:0015

er activity;GO:0015216 purine nucleotide transmembrane transporter activity;GO:0015215 nu

712 transcription coregulator activity;GO:0043565 sequence-specific DNA binding

nositol-3,4-bisphosphate binding;GO:0010314 phosphatidylinositol-5-phosphate binding

erases;GO:0016783 sulfurtransferase activity;GO:0000049 tRNA binding

RNA polymerase II-specific;GO:0008270 zinc ion binding;GO:0043565 sequence-specific DNA

00)Metabolic pathways

733 peptide-lysine-N-acetyltransferase activity;GO:0034212 peptide N-acetyltransferase ac  
nding;GO:0032559 adenylyl ribonucleotide binding

reticulum

8186 RNA-dependent ATPase activity;GO:0003724 RNA helicase activity

DNA binding;GO:0003676 nucleic acid binding  
etic complications; (sce00562)Inositol phosphate metabolism; (sce04070)Phosphatidylinosit  
3420)Nucleotide excision repair  
HF; (M00126)Tetrahydrofolate biosynthesis, GTP => THF; (sce00790)Folate biosynthesis  
e01100)Metabolic pathways

ivator activity;GO:0030695 GTPase regulator activity

495 protein membrane anchor;GO:0005515 protein binding  
P => ADP,ATP; (sce00730)Thiamine metabolism; (M00049)Adenine ribonucleotide biosynthesis,  
0086)beta-Oxidation, acyl-CoA synthesis; (sce00061)Fatty acid biosynthesis

:0016641 oxidoreductase activity, acting on the CH-NH2 group of donors, oxygen as accepto  
haride; (M00065)GPI-anchor biosynthesis, core oligosaccharide; (sce00563)Glycosylphosphat

phase, glucose 6P => ribulose 5P; (sce)Pentose phosphate pathway, oxidative phase, gluco

GO:0008525 phosphatidylcholine transporter activity;GO:0005548 phospholipid transporter a  
0032550 purine ribonucleoside binding

etabolic pathways

02010)ABC transporters; (hsa04976)Bile secretion

6791 phosphatase activity;GO:0042578 phosphoric ester hydrolase activity  
pase activity;GO:0052689 carboxylic ester hydrolase activity

0:0004672 protein kinase activity;GO:0016773 phosphotransferase activity, alcohol group a  
activity;GO:0004864 protein phosphatase inhibitor activity;GO:0019212 phosphatase inhibit

ce-specific DNA binding;GO:0000987 proximal promoter sequence-specific DNA binding;GO:000  
ing;GO:0003682 chromatin binding  
vity;GO:0005088 Ras guanyl-nucleotide exchange factor activity;GO:0017137 Rab GTPase bind  
ne metabolism; (sce00230)Purine metabolism

ity;GO:0022857 transmembrane transporter activity;GO:0005215 transporter activity

ansport

0:0015038 glutathione disulfide oxidoreductase activity;GO:0015037 peptide disulfide oxid

GO:0015075 ion transmembrane transporter activity;GO:0022857 transmembrane transporter ac  
ce04111)Cell cycle - yeast

03674 molecular\_function

r plaque of spindle pole body;GO:0005816 spindle pole body

tivity;GO:0019707 protein-cysteine S-acyltransferase activity;GO:0016417 S-acyltransferas

inding;GO:0043169 cation binding

reticulum

rotubule binding;GO:0015631 tubulin binding

activity;GO:0140097 catalytic activity, acting on DNA

ing;GO:0046914 transition metal ion binding

glycan precursor trimming; (sce)N-glycan biosynthesis, high-mannose type

abolic pathways

070008 serine-type exopeptidase activity;GO:0004180 carboxypeptidase activity

vity;GO:0015179 L-amino acid transmembrane transporter activity;GO:0015171 amino acid tra

e regulator activity;GO:0060589 nucleoside-triphosphatase regulator activity

e regulator activity;GO:0060589 nucleoside-triphosphatase regulator activity

idase activity;GO:0070011 peptidase activity, acting on L-amino acid peptides

ng;GO:0000268 peroxisome targeting sequence binding;GO:0005048 signal sequence binding

um channel activity;GO:0140135 mechanosensitive cation channel activity;GO:0008381 mechan  
ecific DNA binding;GO:0003677 DNA binding

5166)HTLV-I infection

6895 exodeoxyribonuclease activity, producing 5'-phosphomonoesters;GO:0008409 5'-3' exonu

hosphodiesterase I activity;GO:0047429 nucleoside-triphosphate diphosphatase activity

0019208 phosphatase regulator activity;GO:0030234 enzyme regulator activity  
activity;GO:0140097 catalytic activity, acting on DNA

sis - yeast

itin-protein transferase activity;GO:0060090 molecular adaptor activity  
-anchor biosynthesis; (sce01100)Metabolic pathways

surveillance pathway; (sce04138)Autophagy - yeast

GO:0008422 beta-glucosidase activity;GO:0015926 glucosidase activity

cle - yeast; (sce04113)Meiosis - yeast

g;GO:0001069 regulatory region RNA binding;GO:0003729 mRNA binding

dase activity;GO:0015924 mannosyl-oligosaccharide mannosidase activity;GO:0004559 alpha-m  
O:0004672 protein kinase activity;GO:0016773 phosphotransferase activity, alcohol group a

nsferase; (sce)N-glycosylation by oligosaccharyltransferase; (sce00510)N-Glycan biosynthe  
ce-specific DNA binding;GO:0000987 proximal promoter sequence-specific DNA binding;GO:000

specific);GO:0010484 H3 histone acetyltransferase activity;GO:0004402 histone acetyltran

03691 double-stranded telomeric DNA binding;GO:0042162 telomeric DNA binding  
tem; (sce04138)Autophagy - yeast

e regulator activity;GO:0060589 nucleoside-triphosphatase regulator activity  
n binding;GO:0005488 binding

homoserine => threonine; (sce)Threonine biosynthesis, aspartate => homoserine => threonine  
reticulum

otein binding;GO:0005488 binding

olymerase II proximal promoter sequence-specific DNA binding;GO:0003714 transcription cor  
198 structural molecule activity;GO:0003674 molecular function

ization activity;GO:0046983 protein dimerization activity

binding;GO:0003676 nucleic acid binding

ce-specific DNA binding;GO:0000987 proximal promoter sequence-specific DNA binding;GO:000

ce-specific DNA binding;GO:0000987 proximal promoter sequence-specific DNA binding;GO:000

2-oxoadipate; (M00433)Lysine biosynthesis, 2-oxoglutarate => 2-oxoadipate; (M00030)Lysine

;GO:0034212 peptide N-acetyltransferase activity;GO:0008080 N-acetyltransferase activity  
nding;GO:0032559 adenylyl ribonucleotide binding

8186 RNA-dependent ATPase activity;GO:0003724 RNA helicase activity

;GO:0102202 soladodine glucosyltransferase activity;GO:0102203 brassicasterol glucosyltra

ctivity;GO:0016671 oxidoreductase activity, acting on a sulfur group of donors, disulfide

(sce03013)RNA transport

00)Metabolic pathways

rotein localizes to mitochondria; YPL107W is not an essential gene  
binding;GO:1901363 heterocyclic compound binding

04 ATP-dependent RNA helicase activity;GO:0008186 RNA-dependent ATPase activity  
de binding;GO:0030554 adenyl nucleotide binding

y;GO:0015203 polyamine transmembrane transporter activity;GO:0008519 ammonium transmembrane  
transporter activity;GO:0046872 metal ion binding

tivity;GO:0019707 protein-cysteine S-acyltransferase activity;GO:0016417 S-acyltransferase

198 structural molecule activity;GO:0003723 RNA binding  
n, oxaloacetate => 2-oxoglutarate; (sce)Citrate cycle, first carbon oxidation, oxaloacetate  
activity;GO:0003674 molecular\_function

rotein localizes to mitochondria; YMR252C is not an essential gene

ed by Rml01p; YJR061W has a paralog, MNN4, that arose from the whole genome duplication

y;GO:0008324 cation transmembrane transporter activity;GO:0015075 ion transmembrane trans  
;GO:0060590 ATPase regulator activity;GO:0060589 nucleoside-triphosphatase regulator acti  
ylation-dependent protein binding;GO:0140030 modification-dependent protein binding  
ament binding;GO:0003779 actin binding

transporter activity;GO:0005287 high-affinity basic amino acid transmembrane transporter ac

orter activity;GO:0015291 secondary active transmembrane transporter activity  
:0016620 oxidoreductase activity, acting on the aldehyde or oxo group of donors, NAD or N  
ing;GO:1902936 phosphatidylinositol biphosphate binding;GO:1901981 phosphatidylinositol

GO:0005488 binding

PRPP + glutamine => IMP; (sce)Inosine monophosphate biosynthesis, PRPP + glutamine => IMP

ce-specific DNA binding;GO:0000987 proximal promoter sequence-specific DNA binding;GO:000  
haride; (M00065)GPI-anchor biosynthesis, core oligosaccharide; (sce00563)Glycosylphosphat

y;GO:0042124 1,3-beta-glucanosyltransferase activity;GO:0042123 glucanosyltransferase act  
oserine binding;GO:0099122 RNA polymerase II C-terminal domain binding;GO:0050815 phospho  
lication; (sce03420)Nucleotide excision repair  
tivity;GO:0046873 metal ion transmembrane transporter activity;GO:0015077 monovalent inor  
:0033677 DNA/RNA helicase activity;GO:0004003 ATP-dependent DNA helicase activity



GO:0005261 cation channel activity;GO:0022839 ion gated channel activity

ity;GO:0000104 succinate dehydrogenase activity;GO:0016635 oxidoreductase activity, actin

6 iron-sulfur cluster binding;GO:0051540 metal cluster binding  
00)Metabolic pathways

ne metabolism; (sce00230)Purine metabolism

236 serine-type peptidase activity;GO:0017171 serine hydrolase activity  
olic pathways  
13)Meiosis - yeast  
nction

sferase activity, transferring acyl groups other than amino-acyl groups;GO:0016746 transf

ing;GO:0001042 RNA polymerase I core binding;GO:0001181 RNA polymerase I general transcri  
0019208 phosphatase regulator activity;GO:0030234 enzyme regulator activity  
110 transcription regulator activity;GO:0003674 molecular\_function

y;GO:0015174 basic amino acid transmembrane transporter activity;GO:0015171 amino acid tr  
)Autophagy - yeast; (sce01100)Metabolic pathways  
ce-specific DNA binding;GO:0000987 proximal promoter sequence-specific DNA binding;GO:000  
hagy - yeast  
osphatase activity;GO:0016462 pyrophosphatase activity

abolic pathways

DNA binding;GO:0003677 DNA binding  
itiation factor activity;GO:0000049 tRNA binding

pendent ATPase activity;GO:0042623 ATPase activity, coupled  
ding;GO:0008092 cytoskeletal protein binding  
GO:0015036 disulfide oxidoreductase activity;GO:0016667 oxidoreductase activity, acting o

ein complex binding;GO:0044877 protein-containing complex binding  
5)N-glycan precursor biosynthesis; (sce00510)N-Glycan biosynthesis  
0000030 mannosyltransferase activity;GO:0016758 transferase activity, transferring hexosy  
0098518 polynucleotide phosphatase activity;GO:0016791 phosphatase activity  
ding;GO:0046983 protein dimerization activity

ing;GO:0005488 binding  
hagy - yeast

:0003723 RNA binding

ic activity;GO:0003674 molecular\_function

ntous fungus, <i>Ashbya gossypii</i>; SWAT-GFP and seamless-GFP fusion proteins localize  
sequence-specific DNA binding;GO:0001163 RNA polymerase I regulatory region sequence-spec

otein binding;GO:0005488 binding

igase binding;GO:0044389 ubiquitin-like protein ligase binding

GO:0016787 hydrolase activity;GO:0003824 catalytic activity  
e04070)Phosphatidylinositol signaling system; (sce04139)Mitophagy - yeast  
ce04011)MAPK signaling pathway - yeast; (sce01110)Biosynthesis of secondary metabolites  
ity;GO:0003720 telomerase activity;GO:0003964 RNA-directed DNA polymerase activity  
00)Metabolic pathways

binding;GO:0005488 binding

ce04141)Protein processing in endoplasmic reticulum; (sce04111)Cell cycle - yeast

15385 sodium:proton antiporter activity;GO:0005451 monovalent cation:proton antiporter ac  
rganelle;GO:0043227 membrane-bounded organelle  
ty;GO:0005198 structural molecule activity;GO:0003676 nucleic acid binding  
-acetylated histone binding;GO:0140033 acetylation-dependent protein binding  
ne; (M00026)Histidine biosynthesis, PRPP => histidine; (sce00340)Histidine metabolism  
specific;GO:0003747 translation release factor activity;GO:0008079 translation terminati  
ctivity;GO:0009019 tRNA (guanine-N1-)-methyltransferase activity;GO:0016423 tRNA (guanine

de binding;GO:0030554 adenylyl nucleotide binding  
inositol binding;GO:0005543 phospholipid binding

drate kinase activity;GO:0016773 phosphotransferase activity, alcohol group as acceptor  
ing;GO:1902936 phosphatidylinositol bisphosphate binding;GO:0017048 Rho GTPase binding  
oserine binding;GO:0099122 RNA polymerase II C-terminal domain binding;GO:0045142 triplex  
5)N-glycan precursor biosynthesis; (sce00510)N-Glycan biosynthesis

003676 nucleic acid binding  
etabolic pathways

orter activity;GO:0032934 sterol binding

ding;GO:0005096 GTPase activator activity

)Arginine and proline metabolism; (sce00480)Glutathione metabolism

40)Spliceosome; (sce03013)RNA transport

hosphatase activity;GO:0016462 pyrophosphatase activity  
ivity;GO:0005381 iron ion transmembrane transporter activity;GO:0072509 divalent inorgani

ng, bridging;GO:0060090 molecular adaptor activity  
ivity;GO:0043169 cation binding

somerase activity;GO:0003824 catalytic activity  
00083)Fatty acid biosynthesis, elongation; (sce)Fatty acid biosynthesis, initiation  
ce04111)Cell cycle - yeast  
lymerase II activating transcription factor binding;GO:0008094 DNA-dependent ATPase activ

e regulator activity;GO:0060589 nucleoside-triphosphatase regulator activity

139 metal ion:proton antiporter activity;GO:0015386 potassium:proton antiporter activity

ce04141)Protein processing in endoplasmic reticulum

(sce03013)RNA transport  
lication origin binding;GO:0001227 DNA-binding transcription repressor activity, RNA poly

g;GO:0051787 misfolded protein binding;GO:0031072 heat shock protein binding  
species; (sce04011)MAPK signaling pathway - yeast  
serine; (sce)Serine biosynthesis, glycerate-3P => serine; (sce00750)Vitamin B6 metabolism  
e regulator activity;GO:0060589 nucleoside-triphosphatase regulator activity  
ter activity;GO:0046943 carboxylic acid transmembrane transporter activity;GO:0015293 sym  
ce04111)Cell cycle - yeast; (sce04113)Meiosis - yeast

n binding;GO:0005488 binding  
ce-specific DNA binding;GO:0000987 proximal promoter sequence-specific DNA binding;GO:000

-anchor biosynthesis; (sce01100)Metabolic pathways

sce01040)Biosynthesis of unsaturated fatty acids; (sce00071)Fatty acid degradation

e protein binding;GO:0005198 structural molecule activity

;GO:0005488 binding

pendent ATPase activity;GO:0042623 ATPase activity, coupled

g;GO:0043167 ion binding

198 structural molecule activity;GO:0003674 molecular\_function

ivity;GO:0017070 U6 snRNA binding;GO:0000386 second spliceosomal transesterification acti

198 structural molecule activity;GO:0003674 molecular\_function

nding;GO:0005515 protein binding

ctivity;GO:0106050 tRNA 2'-O-methyltransferase activity;GO:0016423 tRNA (guanine) methylt  
te + erythrose-4P => chorismate; (sce)Shikimate pathway, phosphoenolpyruvate + erythrose-

;GO:0043492 ATPase activity, coupled to movement of substances;GO:0005548 phospholipid tr

y;GO:0008028 monocarboxylic acid transmembrane transporter activity;GO:0046943 carboxylic  
24)Platinum drug resistance

nding;GO:0032559 adenylyl ribonucleotide binding

phorylation; (sce01100)Metabolic pathways

nding;GO:0044877 protein-containing complex binding

A binding;GO:0035613 RNA stem-loop binding

activity;GO:0015171 amino acid transmembrane transporter activity;GO:0046943 carboxylic  
doplasmic reticulum; (sce00062)Fatty acid elongation; (sce01040)Biosynthesis of unsaturat

re-mRNA binding;GO:0008270 zinc ion binding

ce-specific DNA binding;GO:0000976 transcription regulatory region sequence-specific DNA

oreductase activity;GO:0003824 catalytic activity

r binding;GO:0001225 RNA polymerase II transcription coactivator binding;GO:0001224 RNA p

inding;GO:0001097 TFIIH-class transcription factor complex binding;GO:0001135 RNA polymer

phosphatase activity;GO:0043175 RNA polymerase core enzyme binding;GO:0004722 protein ser  
ein binding;GO:0005515 protein binding

itor activity;GO:0004857 enzyme inhibitor activity;GO:0030234 enzyme regulator activity

uclease activity;GO:0004518 nuclease activity

ivity;GO:0008195 phosphatidate phosphatase activity;GO:0016791 phosphatase activity

:0016863 intramolecular oxidoreductase activity, transposing C=C bonds;GO:0016860 intramo

y;GO:0016278 lysine N-methyltransferase activity;GO:0008276 protein methyltransferase act  
0032550 purine ribonucleoside binding

ne metabolism; (sce00230)Purine metabolism  
haride; (M00065)GPI-anchor biosynthesis, core oligosaccharide; (sce00563)Glycosylphosphat  
e-stranded RNA-specific ribonuclease activity;GO:0016891 endoribonuclease activity, produ  
he mitochondrial genome; SWAT-GFP and mCherry fusion proteins localize to the mitochondri

peroxiredoxin activity;GO:0004601 peroxidase activity  
n, oxaloacetate => 2-oxoglutarate; (sce)Citrate cycle, first carbon oxidation, oxaloaceta  
NA binding;GO:0003676 nucleic acid binding

g;GO:1901363 heterocyclic compound binding

ing;GO:0030234 enzyme regulator activity  
yzing) activity;GO:0016884 carbon-nitrogen ligase activity, with glutamine as amido-N-don

0005198 structural molecule activity;GO:0003674 molecular\_function

:0016641 oxidoreductase activity, acting on the CH-NH2 group of donors, oxygen as accepto  
pecific DNA binding;GO:0001046 core promoter sequence-specific DNA binding;GO:0016538 cyc  
ne metabolism; (sce00230)Purine metabolism

ansport

itin-protein transferase activity;GO:0060090 molecular adaptor activity  
ree-carbon compounds; (sce)Glycolysis, core module involving three-carbon compounds; (M00

ease activity;GO:0008297 single-stranded DNA exodeoxyribonuclease activity;GO:0035312 5'-  
signaling pathway - yeast

e regulator activity;GO:0060589 nucleoside-triphosphatase regulator activity

tiple species; (sce04144)Endocytosis; (sce03040)Spliceosome  
ate => H2S; (sce)Assimilatory sulfate reduction, sulfate => H2S; (sce00920)Sulfur metabol  
y;GO:0016278 lysine N-methyltransferase activity;GO:0008276 protein methyltransferase act  
3674 molecular\_function  
e => valine / 2-oxobutanoate => isoleucine; (M00019)Valine/isoleucine biosynthesis, pyruv  
idase activity;GO:0008236 serine-type peptidase activity  
specific DNA binding;GO:0003677 DNA binding

nucleoside-diphosphatase activity;GO:0016462 pyrophosphatase activity

3676 nucleic acid binding

e04070)Phosphatidylinositol signaling system; (sce04138)Autophagy - yeast

nding;GO:0008092 cytoskeletal protein binding

NA binding;GO:0003676 nucleic acid binding

e => UDP-galactose; (M00554)Nucleotide sugar biosynthesis, galactose => UDP-galactose; (s  
GO:0008649 rRNA methyltransferase activity;GO:0140102 catalytic activity, acting on a rRN  
tivity, hydrolyzing O-glycosyl compounds;GO:0016798 hydrolase activity, acting on glycosy  
tivity;GO:0046873 metal ion transmembrane transporter activity;GO:0022890 inorganic catio  
ty, RNA polymerase II-specific;GO:0000981 DNA-binding transcription factor activity, RNA

HF; (M00126)Tetrahydrofolate biosynthesis, GTP => THF; (sce00790)Folate biosynthesis

RNA polymerase II-specific;GO:0008270 zinc ion binding;GO:0046914 transition metal ion b

tiation factor activity;GO:0000182 rDNA binding;GO:0000993 RNA polymerase II complex bind  
003960 NADPH:quinone reductase activity;GO:0016628 oxidoreductase activity, acting on the  
0:0004672 protein kinase activity;GO:0016773 phosphotransferase activity, alcohol group a  
binding, bridging;GO:0051015 actin filament binding

reticulum

198 structural molecule activity;GO:0003674 molecular\_function

e01100)Metabolic pathways

hiamine metabolism; (sce01100)Metabolic pathways

vity;GO:0005384 manganese ion transmembrane transporter activity;GO:0015295 solute:proton

ce04111)Cell cycle - yeast; (sce04113)Meiosis - yeast

g;GO:1901363 heterocyclic compound binding

e regulator activity;GO:0060589 nucleoside-triphosphatase regulator activity

itiation factor activity;GO:0008135 translation factor activity, RNA binding

de binding;GO:0030554 adenylyl nucleotide binding

ree-carbon compounds; (sce)Glycolysis, core module involving three-carbon compounds; (M00

species; (sce04011)MAPK signaling pathway - yeast  
5198 structural molecule activity;GO:0003674 molecular\_function  
ribosome binding;GO:0061630 ubiquitin protein ligase activity

0019787 ubiquitin-like protein transferase activity;GO:0140096 catalytic activity, acting

=> 2-oxoisocaproate; (M00432)Leucine biosynthesis, 2-oxoisovalerate => 2-oxoisocaproate;

5198 structural molecule activity;GO:0003674 molecular\_function

tem

oxoglutarate => 2-aminoadipate => lysine; (sce)Lysine biosynthesis, AAA pathway, 2-oxoglu

pendent ATPase activity;GO:0042623 ATPase activity, coupled

4045 aminoacyl-tRNA hydrolase activity;GO:0008079 translation termination factor activity

757 S-adenosylmethionine-dependent methyltransferase activity;GO:0008168 methyltransferas  
(H3-K14 specific);GO:0031078 histone deacetylase activity (H3-K14 specific);GO:0017136 N  
some

0:0004672 protein kinase activity;GO:0016773 phosphotransferase activity, alcohol group a  
signaling pathway - yeast

:0042123 glucanosyltransferase activity;GO:0016740 transferase activity

1100)Metabolic pathways

0:0015450 P-P-bond-hydrolysis-driven protein transmembrane transporter activity;GO:000832

08)Ribosome biogenesis in eukaryotes; (sce03013)RNA transport

tein localizes to the cytoplasm; YPL067C is not an essential gene

ity, DNA binding;GO:0031491 nucleosome binding;GO:0042393 histone binding

phase, glucose 6P => ribulose 5P; (sce)Pentose phosphate pathway, oxidative phase, gluco

binding;GO:0003676 nucleic acid binding

3420)Nucleotide excision repair

GO:0015036 disulfide oxidoreductase activity;GO:0016667 oxidoreductase activity, acting o

multiple species; (sce04138)Autophagy - yeast; (sce04113)Meiosis - yeast

croto tubule binding;GO:0015631 tubulin binding

ce-specific DNA binding;GO:0000987 proximal promoter sequence-specific DNA binding;GO:000

arch and sucrose metabolism; (sce01100)Metabolic pathways

e binding;GO:0004364 glutathione transferase activity

amaged DNA binding;GO:0042623 ATPase activity, coupled

nding;GO:0008092 cytoskeletal protein binding

NH<sub>2</sub> group of donors, NAD or NADP as acceptor;GO:0016638 oxidoreductase activity, acting o  
tivity;GO:0019707 protein-cysteine S-acyltransferase activity;GO:0016417 S-acyltransferas

nuclease activity;GO:0004518 nuclease activity

e activity;GO:0016773 phosphotransferase activity, alcohol group as acceptor

reticulum

abolic pathways

bolism; (sce00240)Pyrimidine metabolism; (sce01100)Metabolic pathways  
tivity;GO:0046873 metal ion transmembrane transporter activity;GO:0015077 monovalent inor  
ce04144)Endocytosis; (sce04011)MAPK signaling pathway - yeast  
uclease activity;GO:0004519 endonuclease activity

; (sce00514)Other types of O-glycan biosynthesis; (sce01100)Metabolic pathways  
serine; (sce)Serine biosynthesis, glycerate-3P => serine; (sce00680)Methane metabolism  
;GO:0042895 antibiotic transmembrane transporter activity;GO:0008028 monocarboxylic acid

70001 aspartic-type peptidase activity;GO:0004175 endopeptidase activity  
y;GO:0072509 divalent inorganic cation transmembrane transporter activity;GO:0046915 tran  
tiple species

198 structural molecule activity;GO:0003674 molecular\_function

;GO:0008092 cytoskeletal protein binding

sphorylation; (sce01100)Metabolic pathways

fic DNA binding;GO:0046914 transition metal ion binding

GO:0051185 coenzyme transmembrane transporter activity;GO:0008028 monocarboxylic acid tra  
0000175 3'-5'-exoribonuclease activity;GO:0016896 exoribonuclease activity, producing 5'-  
O:0043169 cation binding

RNA polymerase II-specific;GO:0008270 zinc ion binding;GO:0043565 sequence-specific DNA  
5166)HTLV-I infection

ity;GO:0015037 peptide disulfide oxidoreductase activity;GO:0015035 protein disulfide oxi  
activity, hydrolyzing O-glycosyl compounds;GO:0016798 hydrolase activity, acting on glyco



31491 nucleosome binding;GO:0042393 histone binding

ding;GO:0070717 poly-purine tract binding

nositol hexakisphosphate binding;GO:0016776 phosphotransferase activity, phosphate group  
0:0004672 protein kinase activity;GO:0016773 phosphotransferase activity, alcohol group a  
oups;GO:0016740 transferase activity;GO:0003824 catalytic activity

01130)Biosynthesis of antibiotics; (sce01110)Biosynthesis of secondary metabolites

prolyl cis-trans isomerase activity;GO:0016859 cis-trans isomerase activity  
abolic pathways

004721 phosphoprotein phosphatase activity;GO:0016791 phosphatase activity

902562 H4 histone acetyltransferase complex;GO:0000123 histone acetyltransferase complex  
y;GO:0015203 polyamine transmembrane transporter activity;GO:0008519 ammonium transmembra  
inding;GO:0043169 cation binding

molecular\_function

;GO:0019205 nucleobase-containing compound kinase activity;GO:0016773 phosphotransferase  
g) kinase activity;GO:0004672 protein kinase activity;GO:0016773 phosphotransferase activ  
00)Metabolic pathways

2-oxoglutarate => oxaloacetate; (M00009)Citrate cycle (TCA cycle, Krebs cycle); (M00011)

molecular\_function

ivity;GO:0050664 oxidoreductase activity, acting on NAD(P)H, oxygen as acceptor;GO:001665  
g;GO:1901363 heterocyclic compound binding

hagy - yeast; (sce04138)Autophagy - yeast

kinase activator activity;GO:0019209 kinase activator activity

40)Pyrimidine metabolism; (sce01100)Metabolic pathways

59 ubiquitin-like protein ligase activity;GO:0004842 ubiquitin-protein transferase activi  
ein complex binding;GO:0044877 protein-containing complex binding

RNA polymerase II-specific;GO:0008270 zinc ion binding;GO:0043565 sequence-specific DNA  
olic pathways

=> GDP,GTP; (M00050)Guanine ribonucleotide biosynthesis IMP => GDP,GTP; (sce00230)Purine  
> CoA; (M00120)Coenzyme A biosynthesis, pantothenate => CoA; (sce00770)Pantothenate and C  
ce04111)Cell cycle - yeast

tch repair complex binding;GO:0008301 DNA binding, bending

09982 pseudouridine synthase activity;GO:0016866 intramolecular transferase activity  
sis - yeast

yl cis-trans isomerase activity;GO:0016859 cis-trans isomerase activity  
in binding;GO:0003779 actin binding

5198 structural molecule activity;GO:0003674 molecular\_function

=> 2-oxoisocaproate; (M00432)Leucine biosynthesis, 2-oxoisovalerate => 2-oxoisocaproate;  
e04011)MAPK signaling pathway - yeast

GO:0033677 DNA/RNA helicase activity;GO:0043138 3'-5' DNA helicase activity  
reticulum

reticulum  
molecular\_function

molecular\_function

is (ALS); (hsa04370)VEGF signaling pathway; (hsa04924)Renin secretion  
activity;GO:1901239 malonate(1-) transmembrane transporter activity;GO:0015131 oxaloaceta  
ity;GO:0015194 L-serine transmembrane transporter activity;GO:0005302 L-tyrosine transmem  
a04151)PI3K-Akt signaling pathway

meric DNA binding;GO:0008094 DNA-dependent ATPase activity

GO:0043169 cation binding  
267 glyoxylate reductase (NADP) activity;GO:0051287 NAD binding

e regulator activity;GO:0060589 nucleoside-triphosphatase regulator activity

doplasmic reticulum; (sce00062)Fatty acid elongation; (sce01040)Biosynthesis of unsaturat

nase binding;GO:0031683 G-protein beta/gamma-subunit complex binding;GO:0019901 protein k

ein complex binding;GO:0044877 protein-containing complex binding  
uorescent protein (GFP)-fusion protein localizes to the vacuole; expression induced by ni  
198 structural molecule activity;GO:0003674 molecular\_function  
ne metabolism; (sce00230)Purine metabolism  
sis - yeast

ce-specific DNA binding;GO:0000987 proximal promoter sequence-specific DNA binding;GO:000  
ce-specific DNA binding;GO:0000987 proximal promoter sequence-specific DNA binding;GO:000  
rotein phosphatase binding;GO:0019902 phosphatase binding

110 transcription regulator activity;GO:0003674 molecular\_function

ce-specific DNA binding;GO:0000987 proximal promoter sequence-specific DNA binding;GO:000  
ion coactivator activity;GO:0003712 transcription coregulator activity  
e04070)Phosphatidylinositol signaling system; (sce04011)MAPK signaling pathway - yeast

ne; (M00026)Histidine biosynthesis, PRPP => histidine; (sce00340)Histidine metabolism

atty acid metabolism; (sce01100)Metabolic pathways

amma-tubulin binding;GO:0008017 microtubule binding

etabolic pathways

:0017150 tRNA dihydrouridine synthase activity;GO:0016627 oxidoreductase activity, acting  
O:0004672 protein kinase activity;GO:0016773 phosphotransferase activity, alcohol group a  
ce-specific DNA binding;GO:0000987 proximal promoter sequence-specific DNA binding;GO:000

0)Cardiac muscle contraction; (hsa05410)Hypertrophic cardiomyopathy (HCM)

RNA polymerase II-specific;GO:0008270 zinc ion binding;GO:0043565 sequence-specific DNA  
198 structural molecule activity;GO:0003674 molecular\_function

GO:0016787 hydrolase activity;GO:0003824 catalytic activity

e (isomerizing) activity;GO:0070548 L-glutamine aminotransferase activity;GO:0008483 tran

ne metabolism; (sce00230)Purine metabolism

;GO:0042979 ornithine decarboxylase regulator activity;GO:0004857 enzyme inhibitor activi  
712 transcription coregulator activity;GO:0140110 transcription regulator activity

activity;GO:0017111 nucleoside-triphosphatase activity

activity;GO:0003674 molecular\_function

ssimilatory sulfate reduction, sulfate => H2S; (sce)Assimilatory sulfate reduction, sulfa  
lecular\_function

g;GO:1901363 heterocyclic compound binding

0019787 ubiquitin-like protein transferase activity;GO:0140096 catalytic activity, acting  
O:0004672 protein kinase activity;GO:0016773 phosphotransferase activity, alcohol group a  
binding;GO:1901363 heterocyclic compound binding

Metabolic pathways

5)N-glycan precursor biosynthesis; (sce00510)N-Glycan biosynthesis

lizes to the cytoplasm and endoplasmic reticulum

236 serine-type peptidase activity;GO:0017171 serine hydrolase activity

processing in endoplasmic reticulum

008536 Ran GTPase binding;GO:0005048 signal sequence binding

ism; (hsa05231)Choline metabolism in cancer

vity regulating pathway - multiple species; (sce04139)Mitophagy - yeast

specific);GO:0010484 H3 histone acetyltransferase activity;GO:0004402 histone acetyltran

rRNA binding;GO:0003729 mRNA binding

kinase activity;GO:0004693 cyclin-dependent protein serine/threonine kinase activity;GO:00032182 ubiquitin-like protein binding

0019208 phosphatase regulator activity;GO:0030234 enzyme regulator activity  
n binding;GO:0005488 binding

promoter binding;GO:0003714 transcription corepressor activity

sm

ansporter activity;GO:0003674 molecular\_function

ion factor binding;GO:0003677 DNA binding

kinase inhibitor activity;GO:0030291 protein serine/threonine kinase inhibitor activity;GO:0030695 GTPase regulator activity

biquitin conjugating enzyme binding;GO:0044390 ubiquitin-like protein conjugating enzyme

69 translation initiation factor binding;GO:0043178 alcohol binding

GO:0005515 protein binding

198 structural molecule activity;GO:0003674 molecular\_function

8079 translation termination factor activity;GO:0043023 ribosomal large subunit binding  
transporter activity;GO:0015079 potassium ion transmembrane transporter activity;GO:0046808 bridging;GO:0043021 ribonucleoprotein complex binding

674 molecular\_function

ular adaptor activity;GO:0005515 protein binding

ansporter activity;GO:0003674 molecular\_function

ymerase II repressing transcription factor binding;GO:0001102 RNA polymerase II activation;GO:005168)Herpes simplex infection; (hsa05203)Viral carcinogenesis

ne metabolism; (sce00230)Purine metabolism

o ADP-ribose; may have a role in tRNA splicing; contains an Alpp domain

g;GO:1901363 heterocyclic compound binding

P => ADP,ATP; (M00049)Adenine ribonucleotide biosynthesis, IMP => ADP,ATP; (sce00250)Alanine

denosylmethionine-dependent methyltransferase activity;GO:0008168 methyltransferase activity;GO:0004004)Spliceosome; (sce03013)RNA transport

e04070)Phosphatidylinositol signaling system; (sce01100)Metabolic pathways

ivity;GO:0004661 protein geranylgeranyltransferase activity;GO:0008318 protein prenyltran

0050661 NADP binding;GO:0045182 translation regulator activity  
 sce00520)Amino sugar and nucleotide sugar metabolism; (sce01110)Biosynthesis of secondary  
 ne metabolism; (sce00230)Purine metabolism  
 23 oxidoreductase activity, oxidizing metal ions, NAD or NADP as acceptor;GO:0016722 oxid  
 ter activity;GO:0046964 3'-phosphoadenosine 5'-phosphosulfate transmembrane transporter a  
 sce01130)Biosynthesis of antibiotics; (sce01110)Biosynthesis of secondary metabolites  
 activity;GO:0015171 amino acid transmembrane transporter activity;GO:0046943 carboxylic  
 e04070)Phosphatidylinositol signaling system; (sce00564)Glycerophospholipid metabolism  
 kinase activity;GO:0004693 cyclin-dependent protein serine/threonine kinase activity;GO:0  
 ase activity;GO:0004197 cysteine-type endopeptidase activity;GO:0008234 cysteine-type pep  
 g;GO:1901363 heterocyclic compound binding  
 ein binding;GO:0005524 ATP binding  
 ing;GO:0070273 phosphatidylinositol-4-phosphate binding;GO:0032266 phosphatidylinositol-3  
 plus-end-directed;GO:1990939 ATP-dependent microtubule motor activity;GO:0003777 microtub  
 ;GO:0016758 transferase activity, transferring hexosyl groups;GO:0016757 transferase acti  
 ree-carbon compounds; (sce)Glycolysis, core module involving three-carbon compounds; (M00  
 de binding;GO:0030554 adenylyl nucleotide binding  
 sis - yeast  
 some binding;GO:0043021 ribonucleoprotein complex binding  
 tryptophan; (M00023)Tryptophan biosynthesis, chorismate => tryptophan; (sce00400)Phenylala  
 se => UDP-glucose; (sce)Nucleotide sugar biosynthesis, glucose => UDP-glucose; (sce00052)(  
 4040 lipid-transporting ATPase activity;GO:0015248 sterol transporter activity  
 0138 ubiquitin-like protein-specific isopeptidase activity;GO:0016929 SUMO-specific prote  
 ribosomal small subunit binding;GO:0043021 ribonucleoprotein complex binding  
 ;GO:0050661 NADP binding;GO:0016709 oxidoreductase activity, acting on paired donors, wit  
 crotubule binding;GO:0015631 tubulin binding  
 1110)Biosynthesis of secondary metabolites; (sce01100)Metabolic pathways  
 ce04111)Cell cycle - yeast; (sce04113)Meiosis - yeast  
 6983 protein dimerization activity;GO:0003677 DNA binding  
 -oxobutanoate => isoleucine; (M00570)Isoleucine biosynthesis, threonine => 2-oxobutanoate  
 yl-CoA; (sce)Pyruvate oxidation, pyruvate => acetyl-CoA; (sce00020)Citrate cycle (TCA cyc  
 haride; (M00065)GPI-anchor biosynthesis, core oligosaccharide; (sce00563)Glycosylphosphat  
 ty, RNA polymerase II-specific;GO:0000981 DNA-binding transcription factor activity, RNA

sm; (sce01110)Biosynthesis of secondary metabolites; (sce01100)Metabolic pathways

ic activity;GO:0003674 molecular\_function

se II proximal promoter sequence-specific DNA binding;GO:0000987 proximal promoter sequen

rt

198 structural molecule activity;GO:0003674 molecular\_function

ivity;GO:0140098 catalytic activity, acting on RNA;GO:0003824 catalytic activity

etabolism; (sce01130)Biosynthesis of antibiotics; (sce01100)Metabolic pathways

recruiting activity;GO:0001134 transcription regulator recruiting activity;GO:0008134 tra

haride; (M00065)GPI-anchor biosynthesis, core oligosaccharide; (sce00563)Glycosylphosphat

sm; (sce01110)Biosynthesis of secondary metabolites; (sce00970)Aminoacyl-tRNA biosynthesi

;GO:0042895 antibiotic transmembrane transporter activity;GO:0008028 monocarboxylic acid

ein complex binding;GO:0044877 protein-containing complex binding

GO:0015075 ion transmembrane transporter activity;GO:0022857 transmembrane transporter ac

8186 RNA-dependent ATPase activity;GO:0003724 RNA helicase activity

;GO:0051020 GTPase binding;GO:0098772 molecular function regulator

e; (M00074)N-glycan biosynthesis, high-mannose type; (sce00513)Various types of N-glycan

lease activity;GO:0004540 ribonuclease activity

-anchor biosynthesis

vity;GO:0005088 Ras guanyl-nucleotide exchange factor activity;GO:0017137 Rab GTPase bind

translation initiation factor activity;GO:0008135 translation factor activity, RNA bindi

;GO:0016616 oxidoreductase activity, acting on the CH-OH group of donors, NAD or NADP as

tivity;GO:0046873 metal ion transmembrane transporter activity;GO:0022890 inorganic catio

ce-specific DNA binding;GO:0000987 proximal promoter sequence-specific DNA binding;GO:000

signaling pathway - yeast

inding;GO:0031267 small GTPase binding

etallopeptidase activity;GO:0016887 ATPase activity

n binding;GO:0005488 binding

sis - yeast

O:0005488 binding

3690 double-stranded DNA binding;GO:0046983 protein dimerization activity

0019208 phosphatase regulator activity;GO:0030234 enzyme regulator activity

ce01110)Biosynthesis of secondary metabolites

tamine (+ PRPP) => UMP; (M00051)Uridine monophosphate biosynthesis, glutamine (+ PRPP) =>  
ty;G0:0016859 cis-trans isomerase activity;G0:0016853 isomerase activity  
oxidoreductase activity, acting on hydrogen as donor, iron-sulfur protein as acceptor;G0  
aminopeptidase activity;G0:0008235 metalloexopeptidase activity  
tiple species; (sce04113)Meiosis - yeast  
00141)C1-unit interconversion, eukaryotes; (sce00460)Cyanoamino acid metabolism

440)Homologous recombination  
se activity;G0:0042910 xenobiotic transmembrane transporter activity;G0:0042626 ATPase ac  
  
e regulator activity;G0:0051879 Hsp90 protein binding

5)N-glycan precursor biosynthesis; (sce00510)N-Glycan biosynthesis

te => phenylalanine; (sce)Phenylalanine biosynthesis, chorismate => phenylalanine; (sce00  
iosynthesis of secondary metabolites; (sce01100)Metabolic pathways  
e; (M00074)N-glycan biosynthesis, high-mannose type; (sce00513)Various types of N-glycan  
RNA polymerase II-specific;G0:0043565 sequence-specific DNA binding;G0:0003700 DNA-bind  
ce-specific DNA binding;G0:0000987 proximal promoter sequence-specific DNA binding;G0:000  
cle; (sce00630)Glyoxylate and dicarboxylate metabolism  
ein complex binding;G0:0044877 protein-containing complex binding  
ate => H<sub>2</sub>S; (sce)Assimilatory sulfate reduction, sulfate => H<sub>2</sub>S; (sce00920)Sulfur metabol  
reticulum  
iosynthesis of secondary metabolites; (sce01100)Metabolic pathways

orter activity;G0:0032934 sterol binding

;G0:1904680 peptide transmembrane transporter activity;G0:0022884 macromolecule transmemb  
etabolism  
exoribonuclease activity, producing 5'-phosphomonoesters;G0:0004532 exoribonuclease activ  
0:1901981 phosphatidylinositol phosphate binding;G0:0035091 phosphatidylinositol binding  
674 molecular\_function  
5198 structural molecule activity;G0:0003674 molecular\_function

)Glycerophospholipid metabolism; (sce01110)Biosynthesis of secondary metabolites  
ce-specific DNA binding;G0:0000987 proximal promoter sequence-specific DNA binding;G0:000  
ein binding;G0:0015631 tubulin binding  
e => valine / 2-oxobutanoate => isoleucine; (M00019)Valine/isoleucine biosynthesis, pyruv  
sis - yeast

8026 ATP-dependent helicase activity;G0:0003678 DNA helicase activity  
;G0:0034212 peptide N-acetyltransferase activity;G0:0008080 N-acetyltransferase activity  
g;G0:0005488 binding

haride; (M00065)GPI-anchor biosynthesis, core oligosaccharide; (sce00563)Glycosylphosphat activity;G0:0016788 hydrolase activity, acting on ester bonds  
G0:0000293 ferric-chelate reductase activity;G0:0016723 oxidoreductase activity, oxidizin

sm; (sce00260)Glycine, serine and threonine metabolism; (sce01110)Biosynthesis of seconda  
fur metabolism; (sce00270)Cysteine and methionine metabolism

0:0004672 protein kinase activity;G0:0016773 phosphotransferase activity, alcohol group a  
0032550 purine ribonucleoside binding

. of an alternative ER targeting pathway that has partial functional redundancy with the G  
vity;G0:0008536 Ran GTPase binding;G0:0005088 Ras guanyl-nucleotide exchange factor activ

ular adaptor activity;G0:0005515 protein binding

g;G0:0003723 RNA binding

en fluorescent protein (GFP)-fusion protein localizes to the cytoplasm and nucleus; homoz  
(sce03013)RNA transport

G0:0043138 3'-5' DNA helicase activity;G0:0004003 ATP-dependent DNA helicase activity  
3676 nucleic acid binding

e; (sce04141)Protein processing in endoplasmic reticulum

ce-specific DNA binding;G0:0000987 proximal promoter sequence-specific DNA binding;G0:000  
733 peptide-lysine-N-acetyltransferase activity;G0:0034212 peptide N-acetyltransferase ac  
7 site of polarized growth

5 endopeptidase regulator activity;G0:0030414 peptidase inhibitor activity

vity;G0:0005088 Ras guanyl-nucleotide exchange factor activity;G0:0017137 Rab GTPase bind

ulfurtransferase activity;G0:0016782 transferase activity, transferring sulfur-containing

vity regulating pathway - multiple species; (sce04138)Autophagy - yeast

3'-flap-structured DNA binding;G0:0070336 flap-structured DNA binding

vity;G0:0016274 protein-arginine N-methyltransferase activity;G0:0016273 arginine N-methy

pendent ATPase activity;G0:0031490 chromatin DNA binding  
ansport

100)Metabolic pathways

olic pathways

ce04111)Cell cycle - yeast; (sce04113)Meiosis - yeast

activity;G0:0016763 transferase activity, transferring pentosyl groups;G0:0140101 cataly  
specific);G0:0018024 histone-lysine N-methyltransferase activity;G0:0016279 protein-lysin

6 iron-sulfur cluster binding;G0:0051540 metal cluster binding



g;G0:1901363 heterocyclic compound binding

e04070)Phosphatidylinositol signaling system; (sce04145)Phagosome  
0:0008320 protein transmembrane transporter activity;G0:0005048 signal sequence binding  
00141)C1-unit interconversion, eukaryotes; (sce00670)One carbon pool by folate

5198 structural molecule activity;G0:0003674 molecular\_function

ding;G0:0005096 GTPase activator activity

098847 sequence-specific single stranded DNA binding;G0:0042162 telomeric DNA binding  
sis - yeast

aining complex binding;G0:0005488 binding  
6888 endodeoxyribonuclease activity, producing 5'-phosphomonoesters;G0:0016895 exodeoxyri  
nsferase; (sce)N-glycosylation by oligosaccharyltransferase; (sce00510)N-Glycan biosynthe  
ansferase activity, transferring hexosyl groups;G0:0016757 transferase activity, transfer  
sis - yeast  
:0016641 oxidoreductase activity, acting on the CH-NH2 group of donors, oxygen as accepto  
198 structural molecule activity;G0:0003674 molecular\_function  
ce04141)Protein processing in endoplasmic reticulum; (sce04111)Cell cycle - yeast  
tivity;G0:0046873 metal ion transmembrane transporter activity;G0:0022890 inorganic catio  
3420)Nucleotide excision repair

itin protein ligase binding;G0:0044389 ubiquitin-like protein ligase binding  
;G0:0034212 peptide N-acetyltransferase activity;G0:0008080 N-acetyltransferase activity

3676 nucleic acid binding  
activity;G0:0009019 tRNA (guanine-N1-)-methyltransferase activity;G0:0016423 tRNA (guanin

G0:0008047 enzyme activator activity

198 structural molecule activity;G0:0003674 molecular\_function  
roline; (sce00332)Carbapenem biosynthesis; (sce)Proline biosynthesis, glutamate => prolin  
13)Meiosis - yeast

8186 RNA-dependent ATPase activity;G0:0003724 RNA helicase activity

ubble DNA binding;G0:0032135 DNA insertion or deletion binding

ctivity;G0:0030332 cyclin binding;G0:0004857 enzyme inhibitor activity

g;G0:1901363 heterocyclic compound binding

ty;G0:0017111 nucleoside-triphosphatase activity

05451 monovalent cation:proton antiporter activity;G0:0022821 potassium ion antiporter ac

;G0:0034212 peptide N-acetyltransferase activity;G0:0008080 N-acetyltransferase activity

tiation factor activity;G0:0017025 TBP-class protein binding;G0:0140223 general transcrip

tryptophan; (M00023)Tryptophan biosynthesis, chorismate => tryptophan; (sce00400)Phenylal

reticulum

5'-phosphomonoesters;G0:0004520 endodeoxyribonuclease activity;G0:0016893 endonuclease ac

ic compound binding;G0:0097159 organic cyclic compound binding

Metabolic pathways

ic compound binding;G0:0097159 organic cyclic compound binding

2-oxoadipate; (M00433)Lysine biosynthesis, 2-oxoglutarate => 2-oxoadipate; (M00030)Lysine

threonine kinase activity;G0:0004672 protein kinase activity

specific);G0:0018024 histone-lysine N-methyltransferase activity;G0:0016279 protein-lysin

0:0008320 protein transmembrane transporter activity;G0:0005048 signal sequence binding

004721 phosphoprotein phosphatase activity;G0:0016791 phosphatase activity

e regulator activity;G0:0051117 ATPase binding

ein complex binding;G0:0044877 protein-containing complex binding

ansferase activity;G0:0003839 gamma-glutamylcyclotransferase activity;G0:0016842 amidine-

e regulator activity;G0:0051087 chaperone binding

phosphatase activity;G0:0004722 protein serine/threonine phosphatase activity;G0:0004721

e pole body;G0:0044450 microtubule organizing center part

ucle

etabolic pathways

3420)Nucleotide excision repair

9 ubiquitin-like protein ligase binding;G0:0019899 enzyme binding

ular adaptor activity;G0:0005515 protein binding

236 serine-type peptidase activity;G0:0017171 serine hydrolase activity

oups;G0:0005198 structural molecule activity;G0:0016740 transferase activity

binding;G0:0004004 ATP-dependent RNA helicase activity;G0:0070180 large ribosomal subuni

ing;G0:0070300 phosphatidic acid binding;G0:1902936 phosphatidylinositol bisphosphate bin

e; (sce04141)Protein processing in endoplasmic reticulum

ator activity;G0:0030695 GTPase regulator activity

reticulum

NA binding, bending;GO:0000217 DNA secondary structure binding  
tor activity;GO:0051015 actin filament binding

-anchor biosynthesis; (sce01100)Metabolic pathways  
:0003993 acid phosphatase activity;GO:0016791 phosphatase activity

ing;GO:0043168 anion binding  
712 transcription coregulator activity;GO:0140110 transcription regulator activity  
ing;GO:1902936 phosphatidylinositol biphosphate binding;GO:1901981 phosphatidylinositol  
e protein binding;GO:0005515 protein binding  
:0008324 cation transmembrane transporter activity;GO:0015075 ion transmembrane transport  
42393 histone binding;GO:0008047 enzyme activator activity

ce04111)Cell cycle - yeast; (sce04113)Meiosis - yeast  
e-specific DNA binding;GO:0001003 RNA polymerase III type 2 promoter sequence-specific DN

amma-tubulin binding;GO:0008017 microtubule binding  
ne phosphatase activity;GO:0004722 protein serine/threonine phosphatase activity;GO:00047  
5198 structural molecule activity;GO:0003674 molecular\_function

etic complications; (sce04070)Phosphatidylinositol signaling system; (sce04139)Mitophagy

ogenesis in eukaryotes  
y;GO:0015174 basic amino acid transmembrane transporter activity;GO:0015171 amino acid tr

ular adaptor activity;GO:0005515 protein binding  
0:0015450 P-P-bond-hydrolysis-driven protein transmembrane transporter activity;GO:000832

kinase regulator activity;GO:0019887 protein kinase regulator activity;GO:0019207 kinase

3 ubiquitin-like protein-specific protease activity;GO:0004222 metalloendopeptidase activ

4 molecular\_function

galactose => alpha-D-glucose-1P; (M00632)Galactose degradation, Leloir pathway, galactose

5)N-glycan precursor biosynthesis; (sce00510)N-Glycan biosynthesis

;GO:0034212 peptide N-acetyltransferase activity;GO:0008080 N-acetyltransferase activity

hagy - yeast; (sce04138)Autophagy - yeast

ein complex binding;GO:0044877 protein-containing complex binding

vity;GO:0036080 purine nucleotide-sugar transmembrane transporter activity;GO:0005338 nucleic acid-protein complex binding;GO:0005515 protein binding

sis, ethanolamine => PE; (M00092)Phosphatidylethanolamine (PE) biosynthesis, ethanolamine transferase; (sce)N-glycosylation by oligosaccharyltransferase; (sce00510)N-Glycan biosynthesis, ethanolamine transferase;GO:0008270 zinc ion binding  
yl-kinase activity;GO:0051735 GTP-dependent polynucleotide kinase activity;GO:0051732 polynucleotide kinase activity;GO:0008092 cytoskeletal protein binding  
sis - yeast

RNA polymerase II-specific;GO:0008270 zinc ion binding;GO:0043565 sequence-specific DNA binding;GO:0008175 tRNA methyltransferase activity;GO:0008171 O-methyltransferase activity  
ular adaptor activity;GO:0005515 protein binding

ity;GO:0016426 tRNA (adenine) methyltransferase activity;GO:0008175 tRNA methyltransferase activity

674 molecular\_function

ribosomal small subunit binding;GO:0070628 proteasome binding

674 molecular\_function

; (sce)PRPP biosynthesis, ribose 5P => PRPP; (sce00030)Pentose phosphate pathway

ng;GO:0005488 binding

hosphatase activity;GO:0016462 pyrophosphatase activity

e => valine / 2-oxobutanoate => isoleucine; (M00019)Valine/isoleucine biosynthesis, pyruvate decarboxylase activity;GO:0015926 glucosidase activity

5198 structural molecule activity;GO:0003674 molecular\_function

GO:0034458 3'-5' RNA helicase activity;GO:0004004 ATP-dependent RNA helicase activity

amine metabolism; (sce01100)Metabolic pathways

;GO:0004386 helicase activity

733 peptide-lysine-N-acetyltransferase activity;GO:0034212 peptide N-acetyltransferase activity

0019208 phosphatase regulator activity;GO:0030234 enzyme regulator activity

ding;GO:0042803 protein homodimerization activity

single-stranded DNA binding;GO:0003729 mRNA binding

TP-dependent RNA helicase activity;GO:0008186 RNA-dependent ATPase activity

yl-CoA; (sce)Pyruvate oxidation, pyruvate => acetyl-CoA; (sce00020)Citrate cycle (TCA cycle) activity, acting on L-amino acid peptides;GO:0008233 peptidase activity

plus-end-directed;GO:1990939 ATP-dependent microtubule motor activity;GO:0003777 microtubule plus-end-directed;GO:1990939 ATP-dependent microtubule motor activity;GO:0003777 microtubule plus-end-directed

674 molecular\_function

ic activity;GO:0003674 molecular\_function

y;GO:0015214 pyrimidine nucleoside transmembrane transporter activity;GO:0005337 nucleoside metabolic pathways

signaling adaptor activity;GO:0032947 protein-containing complex scaffold activity;GO:0008094 DNA-dependent ATPase activity;GO:0003697 single-stranded DNA binding;GO:0006506 GPI-anchor biosynthesis, core oligosaccharide; (sce00563)Glycosylphosphatidylinositol; (sce01100)Metabolic pathways

GO:0005365 myo-inositol transmembrane transporter activity;GO:0015166 polyol transmembrane transporter activity;GO:0034353 RNA pyrophosphohydrolase activity;GO:0016891 endoribonuclease activity;GO:0005401 protein binding

molecular\_function
binding;GO:0008092 cytoskeletal protein binding

as acceptor;GO:0016772 transferase activity, transferring phosphorus-containing groups;GO:0005401 protein binding

activity;GO:0015171 amino acid transmembrane transporter activity;GO:0046943 carboxylic acid transport
ter activity;GO:0015291 secondary active transmembrane transporter activity;GO:0022804 acetyl-CoA carboxylase activity;GO:0003712 transcription coregulator activity
transport
ity;GO:0090482 vitamin transmembrane transporter activity;GO:0015238 drug transmembrane transporter activity;GO:1904680 peptide transmembrane transporter activity;GO:0042887 amide transmembrane transporter activity;GO:0003690 double-stranded DNA binding
3682 chromatin binding;GO:0003674 molecular\_function
5198 structural molecule activity;GO:0003674 molecular\_function
09982 pseudouridine synthase activity;GO:0016866 intramolecular transferase activity

vity;GO:0005459 UDP-galactose transmembrane transporter activity;GO:0015165 pyrimidine nucleoside metabolic pathways
inding;GO:0046914 transition metal ion binding

porter activity;GO:0017016 Ras GTPase binding
;GO:0008821 crossover junction endodeoxyribonuclease activity;GO:0016889 endodeoxyribonuclease activity
is
e04070)Phosphatidylinositol signaling system; (sce01100)Metabolic pathways
me kinetochore;GO:0000780 condensed nuclear chromosome, centromeric region

70)Aminoacyl-tRNA biosynthesis
00083)Fatty acid biosynthesis, elongation; (sce00780)Biotin metabolism

nositol-4-phosphate binding;GO:0005546 phosphatidylinositol-4,5-bisphosphate binding

itin-protein transferase activity;GO:0019787 ubiquitin-like protein transferase activity

hatase activity;GO:0042578 phosphoric ester hydrolase activity

pase activity;GO:0052689 carboxylic ester hydrolase activity

ing;GO:0070064 proline-rich region binding;GO:0003785 actin monomer binding

3676 nucleic acid binding

nding;GO:0032559 adenylyl ribonucleotide binding

:0017111 nucleoside-triphosphatase activity

Metabolic pathways

nding;GO:0008092 cytoskeletal protein binding

-anchor biosynthesis

y;GO:0008324 cation transmembrane transporter activity;GO:0015075 ion transmembrane trans

binding, bridging;GO:0060090 molecular adaptor activity

croto tubule binding;GO:0015631 tubulin binding

r activity;GO:0030234 enzyme regulator activity;GO:0098772 molecular function regulator

movement of ions, phosphorylative mechanism;GO:0004012 phospholipid-translocating ATPase

tiples; (sce04138)Autophagy - yeast; (sce04011)MAPK signaling pathway - yeast

pendent ATPase activity;GO:0042623 ATPase activity, coupled

transferase activity, alcohol group as acceptor;GO:0005524 ATP binding

; (sce)PRPP biosynthesis, ribose 5P => PRPP; (sce00030)Pentose phosphate pathway

ic activity;GO:0003674 molecular\_function

ing;GO:0043168 anion binding

:0005096 GTPase activator activity;GO:0030695 GTPase regulator activity

tor activity;GO:0003779 actin binding

tivity;GO:0046873 metal ion transmembrane transporter activity;GO:0022890 inorganic catio

lanine, aspartate and glutamate metabolism; (sce01210)2-Oxocarboxylic acid metabolism

itin-like protein transferase activity;GO:0140096 catalytic activity, acting on a protein

thesis, PA => PS => PE; (sce)Phosphatidylethanolamine (PE) biosynthesis, PA => PS => PE;

3712 transcription coregulator activity;GO:0046983 protein dimerization activity

transferase activity;GO:0016274 protein-arginine N-methyltransferase activity;GO:0016273 a  
0:0050136 NADH dehydrogenase (quinone) activity;GO:0003954 NADH dehydrogenase activity  
activity;GO:0016788 hydrolase activity, acting on ester bonds  
etallopeptidase activity;GO:0004175 endopeptidase activity  
ding;GO:0008092 cytoskeletal protein binding  
sis - yeast  
0001047 core promoter binding;GO:0008135 translation factor activity, RNA binding  
P => ADP,ATP; (sce00730)Thiamine metabolism; (M00049)Adenine ribonucleotide biosynthesis,  
e01100)Metabolic pathways  
0403 Y-form DNA binding;GO:0000400 four-way junction DNA binding  
3676 nucleic acid binding  
59 ubiquitin-like protein ligase activity;GO:0004842 ubiquitin-protein transferase activi  
215 transporter activity;GO:0003674 molecular\_function  
ansport  
none biosynthesis; (sce01110)Biosynthesis of secondary metabolites; (sce01100)Metabolic p  
00182 rDNA binding;GO:0008094 DNA-dependent ATPase activity  
0022857 transmembrane transporter activity;GO:0005215 transporter activity  
se activity;GO:0004386 helicase activity  
yosin II binding;GO:0032036 myosin heavy chain binding  
5)N-glycan precursor biosynthesis; (sce00510)N-Glycan biosynthesis  
eosome  
0032550 purine ribonucleoside binding  
0:0001091 RNA polymerase II basal transcription factor binding;GO:0001103 RNA polymerase  
e activity;GO:0008418 protein-N-terminal asparagine amidohydrolase activity;GO:0016811 hy  
cellular part  
3676 nucleic acid binding  
vity;GO:0008170 N-methyltransferase activity;GO:0008757 S-adenosylmethionine-dependent me  
ein complex binding;GO:0003729 mRNA binding  
ine metabolism; (sce00230)Purine metabolism  
vity;GO:0005088 Ras guanyl-nucleotide exchange factor activity;GO:0017137 Rab GTPase bind  
ity;GO:0016423 tRNA (guanine) methyltransferase activity;GO:0008175 tRNA methyltransferas

ein complex binding;GO:0044877 protein-containing complex binding

0)Proteasome

GO:0031493 nucleosomal histone binding;GO:0043138 3'-5' DNA helicase activity

uitin binding;GO:0038024 cargo receptor activity

lism; (sce04213)Longevity regulating pathway - multiple species; (sce01100)Metabolic path

linositol binding;GO:0015248 sterol transporter activity

NA-binding transcription factor activity;GO:0140110 transcription regulator activity

some

g) kinase activity;GO:0004672 protein kinase activity;GO:0016773 phosphotransferase activ

8186 RNA-dependent ATPase activity;GO:0003724 RNA helicase activity

104 succinate dehydrogenase activity;GO:0016628 oxidoreductase activity, acting on the CH

hagy - yeast

binding;GO:0005488 binding

pendent ATPase activity;GO:0042623 ATPase activity, coupled

RNA binding;GO:0008143 poly(A) binding

;GO:0005488 binding

ctivity;GO:0016889 endodeoxyribonuclease activity, producing 3'-phosphomonoesters;GO:0016

ce01100)Metabolic pathways

ed in UV-damage excision repair;GO:0008821 crossover junction endodeoxyribonuclease activ

binding;GO:0005488 binding

00)Metabolic pathways

pase activity;GO:0052689 carboxylic ester hydrolase activity

; (sce00910)Nitrogen metabolism; (sce00220)Arginine biosynthesis

ome biogenesis in eukaryotes

ivity;GO:0022857 transmembrane transporter activity;GO:0005215 transporter activity

sce01110)Biosynthesis of secondary metabolites

0032550 purine ribonucleoside binding

n binding;GO:0005488 binding

alpha-glucosidase activity;GO:0015926 glucosidase activity

iosynthesis of unsaturated fatty acids; (sce01110)Biosynthesis of secondary metabolites

amine as amido-N-donor;GO:0016879 ligase activity, forming carbon-nitrogen bonds;GO:00168



ornithine; (sce)Ornithine biosynthesis, glutamate => ornithine; (sce00220)Arginine biosynthesis  
vity regulating pathway - multiple species; (sce04138)Autophagy - yeast

ding;G0:0032559 adenylyl ribonucleotide binding  
oups;G0:0016740 transferase activity;G0:0003824 catalytic activity  
nsferase; (sce)N-glycosylation by oligosaccharyltransferase; (sce00510)N-Glycan biosynthesis

ng;G0:0003779 actin binding;G0:0008092 cytoskeletal protein binding  
ator activity;G0:0030695 GTPase regulator activity  
004402 histone acetyltransferase activity;G0:0061733 peptide-lysine-N-acetyltransferase activity

;G0:0043492 ATPase activity, coupled to movement of substances;G0:0005548 phospholipid transfer  
binding, bridging;G0:0060090 molecular adaptor activity  
G0:0043138 3'-5' DNA helicase activity;G0:0004003 ATP-dependent DNA helicase activity  
ic activity;G0:0003674 molecular\_function

3676 nucleic acid binding

g;G0:0043167 ion binding  
10 kinase inhibitor activity;G0:0019887 protein kinase regulator activity  
itin-protein transferase activity;G0:0060090 molecular adaptor activity  
regulator activity;G0:0043021 ribonucleoprotein complex binding

16 DNA topoisomerase activity;G0:0016853 isomerase activity

0032550 purine ribonucleoside binding  
ome biogenesis in eukaryotes

ansport; (sce04145)Phagosome  
PRPP + glutamine => IMP; (sce)Inosine monophosphate biosynthesis, PRPP + glutamine => IMP  
13)RNA transport  
fic DNA binding;G0:0046914 transition metal ion binding  
lecular\_function

20)Pyruvate metabolism; (sce01200)Carbon metabolism

ce-specific DNA binding;G0:0000987 proximal promoter sequence-specific DNA binding;G0:000  
8186 RNA-dependent ATPase activity;G0:0003724 RNA helicase activity

0:0035184 histone threonine kinase activity;G0:0035173 histone kinase activity  
712 transcription coregulator activity;G0:0140110 transcription regulator activity

iosynthesis of secondary metabolites; (sce01100)Metabolic pathways  
e01100)Metabolic pathways

40)Spliceosome; (sce03013)RNA transport  
se => UDP-glucose; (sce)Nucleotide sugar biosynthesis, glucose => UDP-glucose; (sce00051)RNA  
RNA methyltransferase activity;G0:0140101 catalytic activity, acting on a tRNA  
y;G0:0004422 hypoxanthine phosphoribosyltransferase activity;G0:0004615 phosphomannomutase

kinase regulator activity;GO:0019887 protein kinase regulator activity;GO:0019207 kinase  
rkinson's disease; (hsa04022)cGMP-PKG signaling pathway

ce04111)Cell cycle - yeast

istance to 5-FU; specifically reduces the incorporation of 5-FU into RNA, without affect  
488 binding;GO:0003674 molecular\_function

8186 RNA-dependent ATPase activity;GO:0003724 RNA helicase activity  
activity;GO:0140097 catalytic activity, acting on DNA

0019787 ubiquitin-like protein transferase activity;GO:0140096 catalytic activity, acting  
lecular\_function  
some

;GO:0043492 ATPase activity, coupled to movement of substances;GO:0005548 phospholipid tr  
ding;GO:0008092 cytoskeletal protein binding

00082)Fatty acid biosynthesis, initiation; (sce00061)Fatty acid biosynthesis  
binding;GO:0060090 molecular adaptor activity

0032550 purine ribonucleoside binding

0019787 ubiquitin-like protein transferase activity;GO:0003682 chromatin binding

lication; (sce03420)Nucleotide excision repair

2-oxoglutarate => oxaloacetate; (M00009)Citrate cycle (TCA cycle, Krebs cycle); (M00011)C

0:0010181 FMN binding;GO:0016655 oxidoreductase activity, acting on NAD(P)H, quinone or s

198 structural molecule activity;GO:0003674 molecular\_function

ein complex binding;GO:0044877 protein-containing complex binding

676 nucleic acid binding

e04070)Phosphatidylinositol signaling system; (sce01100)Metabolic pathways

rophosphatase activity;GO:0047429 nucleoside-triphosphate diphosphatase activity;GO:00301

; (sce)PRPP biosynthesis, ribose 5P => PRPP; (sce00030)Pentose phosphate pathway  
otein deacetylase activity;GO:0019213 deacetylase activity

0:0043169 cation binding

ing;GO:0032266 phosphatidylinositol-3-phosphate binding;GO:0070300 phosphatidic acid bind

; (sce01110)Biosynthesis of secondary metabolites; (sce01100)Metabolic pathways

g;GO:1901363 heterocyclic compound binding

doreductase activity, acting on NAD(P)H;GO:0050662 coenzyme binding

de binding;GO:0030554 adenylyl nucleotide binding

e activity;GO:0036459 thiol-dependent ubiquitinyl hydrolase activity;GO:0004197 cysteine-

674 molecular\_function

0019208 phosphatase regulator activity;GO:0030234 enzyme regulator activity

species; (sce04111)Cell cycle - yeast

0:1901981 phosphatidylinositol phosphate binding;GO:0035091 phosphatidylinositol binding  
membrane transporter activity;GO:0015291 secondary active transmembrane transporter activity  
movement of substances;GO:0043492 ATPase activity, coupled to movement of substances;GO:0

e; (M00074)N-glycan biosynthesis, high-mannose type; (sce00513)Various types of N-glycan  
e regulator activity;GO:0098772 molecular function regulator

porter activity;GO:0015234 thiamine transmembrane transporter activity;GO:1901474 azole t

e-stranded RNA-specific ribonuclease activity;GO:0016891 endoribonuclease activity, produ  
ular function regulator;GO:0003674 molecular\_function

from the whole genome duplication

ce-specific DNA binding;GO:0000976 transcription regulatory region sequence-specific DNA

0 carboxypeptidase activity;GO:0008235 metalloexopeptidase activity

0:0004672 protein kinase activity;GO:0016773 phosphotransferase activity, alcohol group a  
lap endonuclease activity;GO:0016888 endodeoxyribonuclease activity, producing 5'-phospho

Metabolic pathways

activity;GO:0140097 catalytic activity, acting on DNA

factor binding;GO:0033613 activating transcription factor binding;GO:0001085 RNA polymer  
kinase regulator activity;GO:0019887 protein kinase regulator activity;GO:0019207 kinase  
c DNA binding;GO:0043565 sequence-specific DNA binding  
:0005092 GDP-dissociation inhibitor activity;GO:0030695 GTPase regulator activity

ydroxypyruvate reductase activity;GO:0030267 glyoxylate reductase (NADP) activity  
0032550 purine ribonucleoside binding

de binding;GO:0032561 guanyl ribonucleotide binding

r activity;GO:0004012 phospholipid-translocating ATPase activity;GO:0015605 organophospha  
674 molecular\_function

specific);GO:0018024 histone-lysine N-methyltransferase activity;GO:0016279 protein-lysine  
GO:1901363 heterocyclic compound binding

activity;GO:0019107 myristoyltransferase activity;GO:0016410 N-acyltransferase activity  
te => phenylalanine; (sce)Phenylalanine biosynthesis, chorismate => phenylalanine; (sce00

nding;GO:0008092 cytoskeletal protein binding  
RNA polymerase II-specific;GO:0008270 zinc ion binding;GO:0043565 sequence-specific DNA  
712 transcription coregulator activity;GO:0140110 transcription regulator activity  
sce00520)Amino sugar and nucleotide sugar metabolism; (sce01130)Biosynthesis of antibiotics - yeast  
reticulum  
g;GO:0043021 ribonucleoprotein complex binding

epimerase activity;GO:0016854 racemase and epimerase activity  
g;GO:1901363 heterocyclic compound binding

GO:0003674 molecular\_function

ce-specific DNA binding;GO:0000987 proximal promoter sequence-specific DNA binding;GO:000  
=> GDP,GTP; (sce)Adenine ribonucleotide biosynthesis, IMP => ADP,ATP; (M00002)Glycolysis  
activity;GO:0031490 chromatin DNA binding;GO:0016747 transferase activity, transferring ac  
TP-dependent RNA helicase activity;GO:0008186 RNA-dependent ATPase activity

6 iron-sulfur cluster binding;GO:0051540 metal cluster binding

n, oxaloacetate => 2-oxoglutarate; (sce)Citrate cycle, first carbon oxidation, oxaloaceta

ce-specific DNA binding;GO:0000987 proximal promoter sequence-specific DNA binding;GO:000  
:0042123 glucanoyltransferase activity;GO:0016740 transferase activity

-anchor biosynthesis; (sce01100)Metabolic pathways  
etabolic pathways  
reticulum

=> GDP,GTP; (M00050)Guanine ribonucleotide biosynthesis IMP => GDP,GTP; (sce00230)Purine  
e activity;GO:0036459 thiol-dependent ubiquitinyl hydrolase activity;GO:0019783 ubiquitin

ce04111)Cell cycle - yeast; (sce04113)Meiosis - yeast

ding;GO:0008092 cytoskeletal protein binding

;GO:0015151 alpha-glucoside transmembrane transporter activity;GO:0042947 glucoside trans

72)Pancreatic secretion; (hsa04261)Adrenergic signaling in cardiomyocytes

vity;GO:0005088 Ras guanyl-nucleotide exchange factor activity;GO:0017137 Rab GTPase binding  
ubiquitin-like modifier activating enzyme activity;GO:0016877 ligase activity, forming  
19843 rRNA binding;GO:0003723 RNA binding  
tive phase, fructose 6P => ribose 5P; (sce)Pentose phosphate pathway, non-oxidative phase  
RNA polymerase III type 3 promoter sequence-specific DNA binding;GO:0001156 TFIIIC-class  
0008194 UDP-glycosyltransferase activity;GO:0016758 transferase activity, transferring he

5198 structural molecule activity;GO:0003674 molecular\_function

transport; (sce04145)Phagosome  
n corepressor activity;GO:0003712 transcription coregulator activity  
carboxylic ester hydrolase activity;GO:0003735 structural constituent of ribosome  
reticulum; (sce03013)RNA transport

01 catalytic activity, acting on a tRNA;GO:0052689 carboxylic ester hydrolase activity  
tivity;GO:0003674 molecular\_function  
iphosphatase activity;GO:0016462 pyrophosphatase activity  
:0016618 hydroxypyruvate reductase activity;GO:0030267 glyoxylate reductase (NADP) activi

NA binding;GO:0003676 nucleic acid binding

ter activity;GO:0046943 carboxylic acid transmembrane transporter activity;GO:0015293 sym  
0032550 purine ribonucleoside binding  
e-specific DNA binding;GO:0001003 RNA polymerase III type 2 promoter sequence-specific DN  
binding;GO:1901363 heterocyclic compound binding  
ribonucleoprotein complex binding;GO:0044877 protein-containing complex binding  
0019787 ubiquitin-like protein transferase activity;GO:0140096 catalytic activity, acting  
-anchor biosynthesis; (sce01100)Metabolic pathways  
ic compound binding;GO:0097159 organic cyclic compound binding

g;GO:1901363 heterocyclic compound binding  
01130)Biosynthesis of antibiotics; (sce01110)Biosynthesis of secondary metabolites

sis, ethanolamine => PE; (sce00440)Phosphonate and phosphinate metabolism; (M00092)Phosph  
004721 phosphoprotein phosphatase activity;G0:0016791 phosphatase activity  
0:0001094 TFIID-class transcription factor complex binding;G0:0001091 RNA polymerase II b  
0032550 purine ribonucleoside binding

pre-mRNA binding;G0:0003723 RNA binding  
ivity;G0:0005381 iron ion transmembrane transporter activity;G0:0072509 divalent inorgani

5)N-glycan precursor biosynthesis; (sce00510)N-Glycan biosynthesis  
(sce04138)Autophagy - yeast  
; (sce)PRPP biosynthesis, ribose 5P => PRPP; (sce00030)Pentose phosphate pathway

ding;G0:0000149 SNARE binding

omal DNA binding;G0:0031491 nucleosome binding  
3676 nucleic acid binding

se II proximal promoter sequence-specific DNA binding;G0:0000987 proximal promoter sequen  
0008135 translation factor activity, RNA binding;G0:0005085 guanyl-nucleotide exchange fa  
etabolism; (sce01100)Metabolic pathways

ne metabolism; (sce00230)Purine metabolism  
0061630 ubiquitin protein ligase activity;G0:0061659 ubiquitin-like protein ligase activi  
e regulator activity;G0:0060589 nucleoside-triphosphatase regulator activity  
lyoxylate and dicarboxylate metabolism; (sce04213)Longevity regulating pathway - multiple  
used expression analysis, and genome-wide homology searching  
sis - yeast  
embrane transporter activity;G0:0015291 secondary active transmembrane transporter activi  
translation initiation factor activity;G0:0008135 translation factor activity, RNA bindi  
p binding;G0:0030619 U1 snRNA binding

y;G0:0072509 divalent inorganic cation transmembrane transporter activity;G0:0046915 tran  
0032550 purine ribonucleoside binding

ng;G0:0044877 protein-containing complex binding;G0:0005488 binding  
activity;G0:0140097 catalytic activity, acting on DNA

#### 4 molecular\_function

4-hydroxybenzoate => ubiquinone; (sce)Ubiquinone biosynthesis, eukaryotes, 4-hydroxybenz  
0:0080025 phosphatidylinositol-3,5-bisphosphate binding;G0:0070273 phosphatidylinositol-4  
e (isomerizing) activity;G0:0070548 L-glutamine aminotransferase activity;G0:0008483 tran

## molecular\_function

pole body;GO:0000779 condensed chromosome, centromeric region  
e-type endopeptidase activity;GO:0008238 exopeptidase activity  
reticulum  
binding;GO:0005488 binding  
recruiting activity;GO:0001134 transcription regulator recruiting activity;GO:0003713 tra  
ein complex binding;GO:0044877 protein-containing complex binding  
;GO:0015151 alpha-glucoside transmembrane transporter activity;GO:0042947 glucoside trans  
PRPP + glutamine => IMP; (sce)Adenine ribonucleotide biosynthesis, IMP => ADP,ATP; (sce)I

-dependent RNA helicase activity;GO:0016896 exoribonuclease activity, producing 5'-phosph  
g;GO:1901363 heterocyclic compound binding  
ferase activity;GO:0008168 methyltransferase activity;GO:0016741 transferase activity, tr  
prolyl cis-trans isomerase activity;GO:0016859 cis-trans isomerase activity  
ine/threonine kinase activity;GO:0004672 protein kinase activity  
specific);GO:0018024 histone-lysine N-methyltransferase activity;GO:0016279 protein-lysin

ein complex binding;GO:0044877 protein-containing complex binding

de binding;GO:0032561 guanyl ribonucleotide binding  
c DNA binding;GO:0003697 single-stranded DNA binding  
g;GO:1901363 heterocyclic compound binding  
ce04111)Cell cycle - yeast  
043539 protein serine/threonine kinase activator activity;GO:0030295 protein kinase activ  
molecular\_function

;GO:0000403 Y-form DNA binding;GO:0070336 flap-structured DNA binding  
0019843 rRNA binding;GO:0008135 translation factor activity, RNA binding

ansferase activity, transferring amino-acyl groups;GO:0003735 structural constituent of r  
ecretion; (hsa04921)Oxytocin signaling pathway  
5198 structural molecule activity;GO:0003674 molecular\_function

RNA polymerase II-specific;GO:0008270 zinc ion binding;GO:0043565 sequence-specific DNA binding;GO:0005088 Ras guanyl-nucleotide exchange factor activity;GO:0017137 Rab GTPase binding;GO:0004672 protein kinase activity;GO:0016773 phosphotransferase activity, alcohol group addition;GO:0005488 binding

GO:1901363 heterocyclic compound binding

-anchor biosynthesis

hsa04974)Protein digestion and absorption; (hsa04972)Pancreatic secretion  
sequence-specific DNA binding;GO:0000987 proximal promoter sequence-specific DNA binding;GO:000000030 mannosyltransferase activity;GO:0016758 transferase activity, transferring hexose  
RNA polymerase II-specific;GO:0008270 zinc ion binding;GO:0043565 sequence-specific DNA binding;GO:0008168 methyltransferase activity;GO:0016741 transferase activity;GO:1901363 heterocyclic compound binding

GO:0004322 ferroxidase activity;GO:0016724 oxidoreductase activity, oxidizing metal ion  
halide; (M00065)GPI-anchor biosynthesis, core oligosaccharide; (sce00563)Glycosylphosphatidylinositol biosynthesis

; (M00074)N-glycan biosynthesis, high-mannose type; (sce00513)Various types of N-glycan biosynthesis  
metabolic pathways

-oxo-5-alpha-steroid 4-dehydrogenase activity;GO:0033765 steroid dehydrogenase activity,  
(sce03013)RNA transport

GO:0008525 phosphatidylcholine transporter activity;GO:0005548 phospholipid transporter activity  
GO:0005215 transporter activity  
GO:0000978 RNA polymerase II proximal promoter sequence-specific DNA binding;GO:0000987 proximal promoter sequence-specific DNA binding;GO:0008134 transcription factor binding;GO:0043565 sequence-specific DNA binding  
GO:0005488 binding  
198 structural molecule activity;GO:0003674 molecular\_function

2-oxoglutarate => 2-aminoadipate => lysine; (sce)Lysine biosynthesis, AAA pathway, 2-oxoglutarate  
GO:0016783 sulfurtransferase activity;GO:0016782 transferase activity, transferring sulfur-containing group  
198 structural molecule activity;GO:0140110 transcription regulator activity  
GO:0016435 rRNA (guanine) methyltransferase activity;GO:0008649 rRNA methyltransferase activity  
GO:0005543 phospholipid binding;GO:0008289 lipid binding  
RNA polymerase II-specific;GO:0008270 zinc ion binding;GO:0043565 sequence-specific DNA binding

acetyl-CoA; (sce)Pyruvate oxidation, pyruvate => acetyl-CoA; (sce00020)Citrate cycle (TCA cycle)  
(sce01130)Biosynthesis of antibiotics  
sequence-specific DNA binding;GO:0000987 proximal promoter sequence-specific DNA binding;GO:000000030 mannosyltransferase activity;GO:0016758 transferase activity, transferring hexose  
ylation-dependent protein binding;GO:0140030 modification-dependent protein binding



6 iron-sulfur cluster binding;GO:0051540 metal cluster binding  
yase activity;GO:0016835 carbon-oxygen lyase activity  
cle; (sce)Citrate cycle, second carbon oxidation, 2-oxoglutarate => oxaloacetate  
110 transcription regulator activity;GO:0003674 molecular\_function

NA binding;GO:0046872 metal ion binding

0008135 translation factor activity, RNA binding;GO:0003924 GTPase activity  
iphosphatase activity;GO:0016462 pyrophosphatase activity

e04070)Phosphatidylinositol signaling system; (sce01100)Metabolic pathways  
itiation factor activity;GO:0001102 RNA polymerase II activating transcription factor bin

ivity;GO:0140098 catalytic activity, acting on RNA;GO:0003824 catalytic activity  
0019208 phosphatase regulator activity;GO:0030234 enzyme regulator activity  
P => ADP,ATP; (M00049)Adenine ribonucleotide biosynthesis, IMP => ADP,ATP; (sce03008)Ribo

ding;GO:0005525 GTP binding  
ing;GO:1902936 phosphatidylinositol biphosphate binding;GO:1901981 phosphatidylinositol  
44390 ubiquitin-like protein conjugating enzyme binding;GO:0061630 ubiquitin protein liga  
09982 pseudouridine synthase activity;GO:0016866 intramolecular transferase activity  
00)Carbon metabolism; (sce01100)Metabolic pathways

110 transcription regulator activity;GO:0003674 molecular\_function  
5198 structural molecule activity;GO:0003674 molecular\_function

elicase activity;GO:0042623 ATPase activity, coupled  
lism; (sce00240)Pyrimidine metabolism; (sce00230)Purine metabolism

sis - yeast

215 transporter activity;GO:0003674 molecular\_function  
vity;GO:0016434 rRNA (cytosine) methyltransferase activity;GO:0008169 C-methyltransferase

ter activity;GO:0015291 secondary active transmembrane transporter activity;GO:0022804 ac  
doplasmic reticulum; (sce00062)Fatty acid elongation; (sce01040)Biosynthesis of unsaturat  
hagy - yeast  
110 transcription regulator activity;GO:0003674 molecular\_function

UMP => UDP/UTP, CDP/CTP; (M00052)Pyrimidine ribonucleotide biosynthesis, UMP => UDP/UTP, C  
ecular transducer activity;GO:0003674 molecular\_function

y;GO:0042124 1,3-beta-glucanosyltransferase activity;GO:0042123 glucanosyltransferase act  
sis, ethanolamine => PE; (sce00440)Phosphonate and phosphinate metabolism; (M00092)Phosph  
tivity;GO:0030291 protein serine/threonine kinase inhibitor activity;GO:0004860 protein k  
activity;GO:0016788 hydrolase activity, acting on ester bonds

ssing in endoplasmic reticulum

75 RNA polymerase core enzyme binding;GO:0001099 basal RNA polymerase II transcription ma  
crotubule binding;GO:0015631 tubulin binding

18)RNA degradation; (sce03013)RNA transport  
n binding;GO:0005488 binding  
ansport

ribonucleoprotein complex binding;GO:0044877 protein-containing complex binding  
pendent ATPase activity;GO:0042623 ATPase activity, coupled  
0480)Glutathione metabolism

aminopeptidase activity;GO:0008235 metalloexopeptidase activity  
7 site of polarized growth  
0005198 structural molecule activity;GO:0003674 molecular\_function

entation; (hsa05152)Tuberculosis; (hsa05166)HTLV-I infection  
00082)Fatty acid biosynthesis, initiation; (sce00061)Fatty acid biosynthesis

activity;GO:0140097 catalytic activity, acting on DNA

n binding;GO:0005488 binding  
0005198 structural molecule activity;GO:0003674 molecular\_function  
ding;GO:0070717 poly-purine tract binding  
674 molecular\_function

porter activity;GO:0017016 Ras GTPase binding  
ty;GO:0032041 NAD-dependent histone deacetylase activity (H3-K14 specific);GO:0031078 his

5)N-glycan precursor biosynthesis; (sce00510)N-Glycan biosynthesis  
sis - yeast

e regulator activity;GO:0060589 nucleoside-triphosphatase regulator activity

ne metabolism; (sce00230)Purine metabolism  
uent of ribosome;GO:0005198 structural molecule activity

0:0015038 glutathione disulfide oxidoreductase activity;GO:0015037 peptide disulfide oxid  
pendent ATPase activity;GO:0042623 ATPase activity, coupled

e-specific double-stranded DNA binding;GO:0003690 double-stranded DNA binding  
in binding;GO:0005488 binding

sphorylation; (sce01100)Metabolic pathways  
ein complex binding;GO:0051082 unfolded protein binding  
ng;GO:0048037 cofactor binding

hagy - yeast

> CoA; (M00120)Coenzyme A biosynthesis, pantothenate => CoA; (sce00770)Pantothenate and C  
e regulator activity;GO:0031072 heat shock protein binding

disulfide isomerase activity;GO:0016670 oxidoreductase activity, acting on a sulfur group

tidyl)-tetraphosphatases; (GFP)-fusion protein localizes to the vacuole; null mutant is h  
cific DNA binding;GO:0001163 RNA polymerase I regulatory region sequence-specific DNA bin  
:0008047 enzyme activator activity;GO:0003779 actin binding

110 transcription regulator activity;GO:0003674 molecular\_function  
dismutase activity;GO:0016721 oxidoreductase activity, acting on superoxide radicals as a  
itin-like protein transferase activity;GO:0003682 chromatin binding

e regulator activity;GO:0060589 nucleoside-triphosphatase regulator activity

5198 structural molecule activity;GO:0003674 molecular\_function  
signaling pathway - yeast

vity;GO:0016434 rRNA (cytosine) methyltransferase activity;GO:0008169 C-methyltransferase  
; (sce01130)Biosynthesis of antibiotics; (sce01100)Metabolic pathways  
e regulator activity;GO:0008565 protein transporter activity

g;GO:1901363 heterocyclic compound binding

activity, hydrolyzing O-glycosyl compounds;GO:0016798 hydrolase activity, acting on glyco  
ator activity;GO:0030695 GTPase regulator activity

3676 nucleic acid binding

alpha kinase activity;GO:0045182 translation regulator activity;GO:0004674 protein serine  
binding;GO:0005488 binding

g;GO:0043167 ion binding

A binding;GO:0035613 RNA stem-loop binding

cle; (sce00630)Glyoxylate and dicarboxylate metabolism

RNA polymerase II-specific;GO:0008270 zinc ion binding;GO:0043565 sequence-specific DNA  
(H3-K14 specific);GO:0031078 histone deacetylase activity (H3-K14 specific);GO:0017136 N  
inding;GO:0070577 lysine-acetylated histone binding;GO:0001091 RNA polymerase II basal tr

00)Metabolic pathways

)Valine, leucine and isoleucine degradation; (sce00340)Histidine metabolism

5)N-glycan precursor biosynthesis; (sce00510)N-Glycan biosynthesis

lication; (sce03420)Nucleotide excision repair

al ion binding;GO:0046872 metal ion binding

e;GO:0008641 ubiquitin-like modifier activating enzyme activity;GO:0016877 ligase activit  
peroxiredoxin activity;GO:0004601 peroxidase activity

tivity;GO:0003674 molecular\_function

yltransferase activity;GO:0003880 protein C-terminal carboxyl O-methyltransferase activit  
ity;GO:0016780 phosphotransferase activity, for other substituted phosphate groups;GO:000

dase activity, acting on L-amino acid peptides;GO:0008233 peptidase activity

ng;GO:0005488 binding

recruiting activity;GO:0001134 transcription regulator recruiting activity;GO:0035064 met  
ce04111)Cell cycle - yeast; (sce04113)Meiosis - yeast

51 monovalent cation:proton antiporter activity;GO:0015299 solute:proton antiporter activ  
se ion binding;GO:0008238 exopeptidase activity

is

(sce01110)Biosynthesis of secondary metabolites; (sce01100)Metabolic pathways

O:0004672 protein kinase activity;GO:0016773 phosphotransferase activity, alcohol group a

n corepressor activity;GO:0003712 transcription coregulator activity

e activity;GO:0036459 thiol-dependent ubiquitinyl hydrolase activity;GO:0004197 cysteine-

ral constituent of nuclear pore;GO:0005198 structural molecule activity

g;GO:0005515 protein binding;GO:0005488 binding

tes; (sce01100)Metabolic pathways

ty acid degradation; (sce00010)Glycolysis / Gluconeogenesis

g;GO:0043167 ion binding

etalloproteinase activity;GO:0016887 ATPase activity

ein complex binding;GO:0004842 ubiquitin-protein transferase activity

ivity;GO:1904680 peptide transmembrane transporter activity;GO:0042887 amide transmembran

e04070)Phosphatidylinositol signaling system; (sce01100)Metabolic pathways

g;GO:0043167 ion binding

g;GO:1901363 heterocyclic compound binding

GO:0043138 3'-5' DNA helicase activity;GO:0004003 ATP-dependent DNA helicase activity

vity;GO:0071617 lysophospholipid acyltransferase activity;GO:0004806 triglyceride lipase

3676 nucleic acid binding

5198 structural molecule activity;GO:0003674 molecular\_function

-oxobutanoate => isoleucine; (M00570)Isoleucine biosynthesis, threonine => 2-oxobutanoate

ferase activity;GO:0008168 methyltransferase activity;GO:0016741 transferase activity, tr

g;GO:1901363 heterocyclic compound binding

; (sce00514)Other types of O-glycan biosynthesis; (sce01100)Metabolic pathways

44390 ubiquitin-like protein conjugating enzyme binding;GO:0019899 enzyme binding

inding;GO:0031267 small GTPase binding

9 4 iron, 4 sulfur cluster binding;GO:0051536 iron-sulfur cluster binding

ng, bridging;GO:0060090 molecular adaptor activity

sis - yeast

44390 ubiquitin-like protein conjugating enzyme binding;GO:0043130 ubiquitin binding  
ity;GO:0015606 spermidine transmembrane transporter activity;GO:0000095 S-adenosyl-L-meth  
tamine (+ PRPP) => UMP; (M00051)Uridine monophosphate biosynthesis, glutamine (+ PRPP) =>  
0000030 mannosyltransferase activity;GO:0016758 transferase activity, transferring hexosy  
ty;GO:0005351 carbohydrate:proton symporter activity;GO:0015149 hexose transmembrane tran  
e; (sce04141)Protein processing in endoplasmic reticulum  
etallopeptidase activity;GO:0004175 endopeptidase activity  
sce01130)Biosynthesis of antibiotics  
is (ALS)  
etabolic pathways  
y;GO:0008028 monocarboxylic acid transmembrane transporter activity;GO:0046943 carboxylic  
tivity;GO:0033549 MAP kinase phosphatase activity;GO:0004724 magnesium-dependent protein  
e activity;GO:0036459 thiol-dependent ubiquitinyl hydrolase activity;GO:0019783 ubiquitin  
:0042123 glucanosyltransferase activity;GO:0016740 transferase activity  
ne metabolism; (sce00230)Purine metabolism  
ing;GO:0043168 anion binding  
ic activity;GO:0003674 molecular\_function  
helicase activity;GO:0004386 helicase activity  
sphorylation; (sce01100)Metabolic pathways  
lar to C. albicans Worlp transcription factor that regulates white-opaque switching; over  
factor binding;GO:0033613 activating transcription factor binding;GO:0001085 RNA polymer  
er activity;GO:0042626 ATPase activity, coupled to transmembrane movement of substances;G  
inding;GO:0051880 G-quadruplex DNA binding;GO:0001091 RNA polymerase II basal transcripti  
)Metabolic pathways

ity;G0:0008094 DNA-dependent ATPase activity;G0:0004386 helicase activity  
olic pathways

inding;G0:0043169 cation binding

0:0004672 protein kinase activity;G0:0016773 phosphotransferase activity, alcohol group a  
aminopeptidase activity;G0:0008235 metalloexopeptidase activity

ester hydrolase activity;G0:0016788 hydrolase activity, acting on ester bonds

3676 nucleic acid binding

733 peptide-lysine-N-acetyltransferase activity;G0:0034212 peptide N-acetyltransferase ac

01130)Biosynthesis of antibiotics; (sce01110)Biosynthesis of secondary metabolites  
ansport; (sce04138)Autophagy - yeast  
specific);G0:0018024 histone-lysine N-methyltransferase activity;G0:0016279 protein-lysin  
sis - yeast

ce04111)Cell cycle - yeast; (sce04113)Meiosis - yeast  
tivity;G0:0019707 protein-cysteine S-acyltransferase activity;G0:0016417 S-acyltransferas

ribosomal small subunit binding;G0:0043021 ribonucleoprotein complex binding

hway; (hsa04211)Longevity regulating pathway; (hsa04152)AMPK signaling pathway  
92 RNA guanylyltransferase activity;G0:0070568 guanylyltransferase activity  
transmembrane transporter activity;G0:0005347 ATP transmembrane transporter activity

taurine dioxygenase activity;G0:0016706 oxidoreductase activity, acting on paired donors,  
cycle - yeast

binding;G0:0003677 DNA binding  
g;G0:1901363 heterocyclic compound binding  
;G0:0008047 enzyme activator activity;G0:0051020 GTPase binding  
11)Cell cycle - yeast

somerase activity;G0:0003824 catalytic activity  
0019787 ubiquitin-like protein transferase activity;G0:0140096 catalytic activity, acting

nding;G0:0000976 transcription regulatory region sequence-specific DNA binding;G0:1990837  
tophan metabolism; (sce)Citrate cycle, second carbon oxidation, 2-oxoglutarate => oxaloac

Peroxisome

00)Carbon metabolism; (sce01130)Biosynthesis of antibiotics  
processing in endoplasmic reticulum

1 peroxidase activity;G0:0016684 oxidoreductase activity, acting on peroxide as acceptor  
e regulator activity;G0:0060589 nucleoside-triphosphatase regulator activity  
40)Pyrimidine metabolism

ity;GO:0004721 phosphoprotein phosphatase activity;GO:0016791 phosphatase activity

transmembrane transporter activity;GO:0005347 ATP transmembrane transporter activity  
PRPP + glutamine => IMP; (sce)Inosine monophosphate biosynthesis, PRPP + glutamine => IMP

uclease activity;GO:0004518 nuclease activity  
osine/serine/threonine phosphatase activity;GO:0004725 protein tyrosine phosphatase activ

arch and sucrose metabolism; (sce01100)Metabolic pathways

215 transporter activity;GO:0003674 molecular\_function  
ree-carbon compounds; (sce)Glycolysis, core module involving three-carbon compounds; (M00  
674 molecular\_function

nsporter activity;GO:0015301 anion:anion antiporter activity;GO:0015116 sulfate transmemb

de binding;GO:0032561 guanyl ribonucleotide binding  
ivity;GO:0016279 protein-lysine N-methyltransferase activity;GO:0016278 lysine N-methyltr

activity;GO:0052689 carboxylic ester hydrolase activity  
d DNA binding;GO:0046914 transition metal ion binding  
e-phosphate deaminase activity;GO:0016814 hydrolase activity, acting on carbon-nitrogen (  
amaged DNA binding;GO:0004386 helicase activity  
3676 nucleic acid binding

sce00590)Arachidonic acid metabolism; (sce)Acylglycerol degradation

0 uracil transmembrane transporter activity;GO:0015391 nucleobase:cation symporter activi

hreonine biosynthesis, aspartate => homoserine => threonine; (sce)Threonine biosynthesis,

on metabolism  
e; (sce04141)Protein processing in endoplasmic reticulum  
ity;GO:0008251 tRNA-specific adenosine deaminase activity;GO:0004000 adenosine deaminase

141)Protein processing in endoplasmic reticulum



0016891 endoribonuclease activity, producing 5'-phosphomonoesters;G0:0016893 endonuclease  
ome biogenesis in eukaryotes

G0:0015036 disulfide oxidoreductase activity;G0:0016667 oxidoreductase activity, acting o  
198 structural molecule activity;G0:0003674 molecular\_function  
PRPP + glutamine => IMP; (sce)Inosine monophosphate biosynthesis, PRPP + glutamine => IMP

ivity;G0:0008276 protein methyltransferase activity;G0:0008168 methyltransferase activity

;G0:0042895 antibiotic transmembrane transporter activity;G0:0008028 monocarboxylic acid  
lism; (sce00240)Pyrimidine metabolism  
> THF; (sce)Tetrahydrofolate biosynthesis, GTP => THF; (sce00790)Folate biosynthesis

ty, RNA polymerase II-specific;G0:0000978 RNA polymerase II proximal promoter sequence-sp  
3676 nucleic acid binding

etabolic pathways

se activity;G0:0004518 nuclease activity  
410)Base excision repair; (sce03030)DNA replication  
ce04111)Cell cycle - yeast

species; (sce04011)MAPK signaling pathway - yeast  
rotein localizes to mitochondria; YLR281C is not an essential gene

kinase regulator activity;G0:0019887 protein kinase regulator activity;G0:0019207 kinase  
ne metabolism; (sce00230)Purine metabolism

3676 nucleic acid binding  
se ion binding;G0:0008238 exopeptidase activity  
0003723 RNA binding  
0000030 mannosyltransferase activity;G0:0016758 transferase activity, transferring hexosy  
(sce01110)Biosynthesis of secondary metabolites; (sce01100)Metabolic pathways  
ein complex binding;G0:0008233 peptidase activity

ein complex binding;G0:0008289 lipid binding

y;G0:0015174 basic amino acid transmembrane transporter activity;G0:0015171 amino acid tr

cific DNA binding;G0:0001179 RNA polymerase I transcription factor binding;G0:0001163 RNA  
ing;G0:0015631 tubulin binding

215 transporter activity;GO:0003674 molecular\_function  
sm; (sce01110)Biosynthesis of secondary metabolites; (sce01100)Metabolic pathways  
-N(6))-dimethyltransferase activity;GO:0008988 rRNA (adenine-N6-)-methyltransferase activ  
itin-like protein transferase activity;GO:0008270 zinc ion binding  
elial cells  
ivity;GO:0140098 catalytic activity, acting on RNA;GO:0003824 catalytic activity  
3676 nucleic acid binding  
=> GDP,GTP; (M00050)Guanine ribonucleotide biosynthesis IMP => GDP,GTP; (sce00230)Purine  
n binding;GO:0005488 binding

-anchor biosynthesis; (sce01100)Metabolic pathways  
activity;GO:0052855 ADP-dependent NAD(P)H-hydrate dehydratase activity;GO:0016836 hydro-l  
ctivity;GO:0120108 DNA-3'-diphospho-5'-guanosine diphosphatase;GO:0035312 5'-3' exodeoxyr

sm; (sce01110)Biosynthesis of secondary metabolites; (sce01100)Metabolic pathways  
Glycerolipid metabolism; (sce00564)Glycerophospholipid metabolism  
inding;GO:0031267 small GTPase binding

iphosphatase activity;GO:0016462 pyrophosphatase activity

RNA polymerase II-specific;GO:0008270 zinc ion binding;GO:0046914 transition metal ion b  
ansporter activity;GO:0046872 metal ion binding

tivity;GO:0015562 efflux transmembrane transporter activity;GO:0008519 ammonium transmemb  
ein complex binding;GO:0044877 protein-containing complex binding

plus-end-directed;GO:1990939 ATP-dependent microtubule motor activity;GO:0003777 microtub  
lism; (sce04213)Longevity regulating pathway - multiple species; (sce01100)Metabolic path  
n binding;GO:0005488 binding

0008553 proton-exporting ATPase activity, phosphorylative mechanism;GO:0005388 calcium-tr

3 ATPase activity, coupled;GO:0051082 unfolded protein binding

vity;GO:0015038 glutathione disulfide oxidoreductase activity;GO:0016672 oxidoreductase a  
sphorylation; (sce01100)Metabolic pathways  
e biogenesis in eukaryotes  
GO:0005261 cation channel activity;GO:0022839 ion gated channel activity

42623 ATPase activity, coupled;G0:0016887 ATPase activity

sterol => cholate/chenodeoxycholate; (hsa)Bile acid biosynthesis, cholesterol => cholate/  
ein complex binding;G0:0003924 GTPase activity

75 RNA polymerase core enzyme binding;G0:0001099 basal RNA polymerase II transcription ma  
non-tagged protein is detected in highly purified mitochondria in high-throughput studies

g;G0:0051082 unfolded protein binding;G0:0015631 tubulin binding

87 DNA-directed DNA polymerase activity;G0:0034061 DNA polymerase activity

. of an alternative ER targeting pathway that has partial functional redundancy with the G  
0:0003676 nucleic acid binding  
70)Aminoacyl-tRNA biosynthesis

sis - yeast

ithine => putrescine; (M00134)Polyamine biosynthesis, arginine => ornithine => putrescine  
e-specific DNA binding;G0:0001003 RNA polymerase III type 2 promoter sequence-specific DN

central plaque of spindle pole body;G0:0005816 spindle pole body

pendent ATPase activity;G0:0042623 ATPase activity, coupled

tamine (+ PRPP) => UMP; (M00051)Uridine monophosphate biosynthesis, glutamine (+ PRPP) =>

0:0005488 binding

ty, RNA polymerase II-specific;G0:0001228 DNA-binding transcription activator activity, R

; (sce00514)Other types of O-glycan biosynthesis; (sce01100)Metabolic pathways  
008270 zinc ion binding;G0:0046914 transition metal ion binding  
ctivity;G0:0016788 hydrolase activity, acting on ester bonds

5198 structural molecule activity;G0:0003674 molecular\_function

g;G0:0005488 binding

;G0:0003913 DNA photolyase activity;G0:0016830 carbon-carbon lyase activity

g;G0:0019843 rRNA binding

sis - yeast

ion coactivator activity;GO:0003712 transcription coregulator activity

A binding;GO:0004004 ATP-dependent RNA helicase activity

ne metabolism; (sce00230)Purine metabolism

inding;GO:0031267 small GTPase binding

00)Metabolic pathways

ing;GO:0005488 binding

ylation-dependent protein binding;GO:0140030 modification-dependent protein binding

leosome binding;GO:0003697 single-stranded DNA binding

ctivity;GO:0004222 metalloendopeptidase activity;GO:0008237 metallopeptidase activity

vity;GO:0005085 guanyl-nucleotide exchange factor activity;GO:0017016 Ras GTPase binding

uent of ribosome;GO:0005198 structural molecule activity

110 transcription regulator activity;GO:0003674 molecular\_function

sis - yeast

GO:0003723 RNA binding

9 ubiquitin-like protein ligase binding;GO:0019899 enzyme binding

ansport

ity;GO:0015230 FAD transmembrane transporter activity;GO:0005310 dicarboxylic acid transm

tivity;GO:0055106 ubiquitin-protein transferase regulator activity;GO:0043495 protein mem

etallopeptidase activity;GO:0004175 endopeptidase activity

ithine => putrescine; (M00134)Polyamine biosynthesis, arginine => ornithine => putrescine

7108 5'-flap endonuclease activity;GO:0048256 flap endonuclease activity

09982 pseudouridine synthase activity;GO:0016866 intramolecular transferase activity

r activity;GO:0004012 phospholipid-translocating ATPase activity;GO:0015605 organophospha

movement of substances;GO:0043492 ATPase activity, coupled to movement of substances;GO:00016278 lysine N-methyltransferase activity;GO:0008276 protein methyltransferase activities  
(sce04111)Cell cycle - yeast; (sce04113)Meiosis - yeast

protein phosphatase regulator activity;GO:0043022 ribosome binding  
molecular adaptor activity;GO:0005515 protein binding

purine metabolism; (sce00230)Purine metabolism

8 single base insertion or deletion binding;GO:0032137 guanine/thymine mispair binding

transferase activity;GO:0008168 methyltransferase activity;GO:0016741 transferase activity, transmembrane anchor biosynthesis; (sce01100)Metabolic pathways  
activity;GO:0005085 guanyl-nucleotide exchange factor activity;GO:0017016 Ras GTPase binding

(sce04070)Phosphatidylinositol signaling system; (sce01100)Metabolic pathways

; (sce)PRPP biosynthesis, ribose 5P => PRPP; (sce00030)Pentose phosphate pathway  
nucleic acid binding;GO:0003677 DNA binding  
phosphatase activity;GO:0052689 carboxylic ester hydrolase activity  
acetyl-CoA; (sce)Pyruvate oxidation, pyruvate => acetyl-CoA; (sce00640)Propanoate metabolism  
glycan precursor trimming; (sce00510)N-Glycan biosynthesis

binding;GO:0044877 protein-containing complex binding

GO:004721 phosphoprotein phosphatase activity;GO:0016791 phosphatase activity  
motor activity;GO:0051015 actin filament binding  
GO:003676 nucleic acid binding

;GO:0005488 binding

GO:0015215 nucleotide transmembrane transporter activity;GO:0051184 cofactor transmembrane transporter activity

microtubule binding;GO:0015631 tubulin binding  
pre-mRNA binding;GO:0003723 RNA binding

binding;GO:0008094 DNA-dependent ATPase activity

(sce)Autophagy - yeast; (sce01100)Metabolic pathways

(sce)Metabolic pathways

GO:0015440 peptide-transporting ATPase activity;GO:0033220 amide-transporting ATPase activity

GO:005198 structural molecule activity;GO:0003674 molecular\_function

kinase regulator activity;GO:0019887 protein kinase regulator activity;GO:0019207 kinase  
ctase activity, acting on a sulfur group of donors;GO:0016209 antioxidant activity

kinase activator activity;GO:0016538 cyclin-dependent protein serine/threonine kinase reg  
transmembrane transporter activity;GO:0005347 ATP transmembrane transporter activity  
ornithine; (sce)Ornithine biosynthesis, glutamate => ornithine; (sce00220)Arginine biosyn  
ansport; (sce04138)Autophagy - yeast  
lism; (sce04213)Longevity regulating pathway - multiple species; (sce01100)Metabolic path  
ein complex binding;GO:0016810 hydrolase activity, acting on carbon-nitrogen (but not pep

0:0017150 tRNA dihydrouridine synthase activity;GO:0016627 oxidoreductase activity, actin  
1630 ubiquitin protein ligase activity;GO:0061659 ubiquitin-like protein ligase activity  
ein complex binding;GO:0044877 protein-containing complex binding

6791 phosphatase activity;GO:0042578 phosphoric ester hydrolase activity  
ding;GO:0070717 poly-purine tract binding  
5)N-glycan precursor biosynthesis; (sce00510)N-Glycan biosynthesis  
0:0004672 protein kinase activity;GO:0016773 phosphotransferase activity, alcohol group a

crotochord binding;GO:0015631 tubulin binding  
protein localizes to the endoplasmic reticulum; YDL121C is not an essential protein

activity;GO:0003729 mRNA binding

791 phosphatase activity;GO:0042578 phosphoric ester hydrolase activity  
itor activity;GO:0004857 enzyme inhibitor activity;GO:0030234 enzyme regulator activity  
19 lipid transporter activity;GO:0005215 transporter activity  
ein complex binding;GO:0044877 protein-containing complex binding

0:0004672 protein kinase activity;GO:0016773 phosphotransferase activity, alcohol group a

;GO:0051020 GTPase binding;GO:0098772 molecular function regulator

arch and sucrose metabolism; (sce01100)Metabolic pathways

hionine salvage pathway; (sce00270)Cysteine and methionine metabolism  
etabolic pathways  
ide excision repair

ansport

ne metabolism; (sce00230)Purine metabolism

RNA polymerase II-specific;GO:0008270 zinc ion binding;GO:0043565 sequence-specific DNA  
y;GO:0016278 lysine N-methyltransferase activity;GO:0008276 protein methyltransferase act

n binding;GO:0005488 binding

5198 structural molecule activity;GO:0003674 molecular\_function  
13)RNA transport

cle - yeast; (sce04113)Meiosis - yeast

tiation factor activity;GO:0000182 rDNA binding;GO:0140223 general transcription initiati

sporter activity;GO:0017016 Ras GTPase binding  
binding;GO:0033218 amide binding  
mbrane transporter activity;GO:0008320 protein transmembrane transporter activity;GO:1904  
688 preribosome, small subunit precursor  
ce-specific DNA binding;GO:0000987 proximal promoter sequence-specific DNA binding;GO:000  
ne metabolism; (sce00230)Purine metabolism

some  
sce00561)Glycerolipid metabolism; (sce00680)Methane metabolism

:0070004 cysteine-type exopeptidase activity;GO:1990380 Lys48-specific deubiquitinase act  
ic activity;GO:0003674 molecular\_function  
3676 nucleic acid binding

pendent ATPase activity;GO:0042623 ATPase activity, coupled  
ding, bending;GO:1990837 sequence-specific double-stranded DNA binding

sis - yeast

70)Aminoacyl-tRNA biosynthesis

e-specific DNA binding;GO:0001003 RNA polymerase III type 2 promoter sequence-specific DN  
ce-specific DNA binding;GO:0000987 proximal promoter sequence-specific DNA binding;GO:000

198 structural molecule activity;GO:0003674 molecular\_function  
92 endoribonuclease activity, producing 3'-phosphomonoesters;GO:0004549 tRNA-specific rib  
pase activity;GO:0052689 carboxylic ester hydrolase activity  
pendent ATPase activity;GO:0031490 chromatin DNA binding

ethane metabolism; (sce00620)Pyruvate metabolism  
holipase activity;GO:0016298 lipase activity

oups;GO:0016740 transferase activity;GO:0003824 catalytic activity

ize to the cell periphery  
ty, RNA polymerase II-specific;GO:0000987 proximal promoter sequence-specific DNA binding

-acetylated histone binding;GO:0140033 acetylation-dependent protein binding  
glycan precursor trimming; (sce)N-glycan biosynthesis, high-mannose type  
y;GO:0070567 cytidyltransferase activity;GO:0016779 nucleotidyltransferase activity  
sm

0:0015450 P-P-bond-hydrolysis-driven protein transmembrane transporter activity;GO:000832  
)Metabolic pathways  
PRPP + glutamine => IMP; (sce)Inosine monophosphate biosynthesis, PRPP + glutamine => IMP  
GO:0000293 ferric-chelate reductase activity;GO:0016723 oxidoreductase activity, oxidizin

itor activity;GO:0004864 protein phosphatase inhibitor activity;GO:0019212 phosphatase in  
GO:0016972 thiol oxidase activity;GO:0016670 oxidoreductase activity, acting on a sulfur

ity;GO:0046943 carboxylic acid transmembrane transporter activity;GO:0008514 organic anio  
674 molecular\_function  
sphorylation; (sce01100)Metabolic pathways  
;GO:0003755 peptidyl-prolyl cis-trans isomerase activity

vity;GO:0005085 guanyl-nucleotide exchange factor activity;GO:0051020 GTPase binding



0019212 phosphatase inhibitor activity;GO:0019888 protein phosphatase regulator activity

ity;GO:0022857 transmembrane transporter activity;GO:0005215 transporter activity

01 catalytic activity, acting on a tRNA;GO:0052689 carboxylic ester hydrolase activity  
n binding;GO:0005488 binding

; (sce00514)Other types of O-glycan biosynthesis; (sce01100)Metabolic pathways

pendent ATPase activity;GO:0042623 ATPase activity, coupled

binding;GO:0033218 amide binding  
de binding;GO:0032561 guanyl ribonucleotide binding

-anchor biosynthesis; (sce00510)N-Glycan biosynthesis; (sce01100)Metabolic pathways

n binding;GO:0008092 cytoskeletal protein binding  
activity, hydrolyzing O-glycosyl compounds;GO:0016798 hydrolase activity, acting on glyco  
e-specific double-stranded DNA binding;GO:0003690 double-stranded DNA binding  
sporter activity;GO:0017016 Ras GTPase binding  
6788 hydrolase activity, acting on ester bonds;GO:0016787 hydrolase activity  
ce04111)Cell cycle - yeast

:0022857 transmembrane transporter activity;GO:0005215 transporter activity

vity;GO:0005085 guanyl-nucleotide exchange factor activity;GO:0051020 GTPase binding  
(FP)-fusion protein localizes to mitochondria and is induced in response to the DNA-damagi

ein complex binding;GO:0044877 protein-containing complex binding

)Metabolic pathways

g;GO:1901363 heterocyclic compound binding

lecular\_function

;GO:0016758 transferase activity, transferring hexosyl groups;GO:0016757 transferase acti  
:0017111 nucleoside-triphosphatase activity

serine; (sce)Serine biosynthesis, glycerate-3P => serine; (sce00680)Methane metabolism  
sferase activity, transferring acyl groups other than amino-acyl groups;GO:0016746 transf  
(sce03013)RNA transport  
ic activity;GO:0003674 molecular\_function  
GO:1901265 nucleoside phosphate binding

g;GO:1901363 heterocyclic compound binding

ornithine; (sce)Ornithine biosynthesis, glutamate => ornithine; (sce00220)Arginine biosyn  
nsporter activity;GO:0015301 anion:anion antiporter activity;GO:0015116 sulfate transmemb

5198 structural molecule activity;GO:0003674 molecular\_function

te + erythrose-4P => chorismate; (sce)Shikimate pathway, phosphoenolpyruvate + erythrose-  
005048 signal sequence binding;GO:0017056 structural constituent of nuclear pore  
ivity;GO:0004672 protein kinase activity;GO:0016773 phosphotransferase activity, alcohol

reticulum

rase activity;GO:0016274 protein-arginine N-methyltransferase activity;GO:0016273 arginin  
rsions; (sce00561)Glycerolipid metabolism; (sce00010)Glycolysis / Gluconeogenesis

0019787 ubiquitin-like protein transferase activity;GO:0140096 catalytic activity, acting  
de binding;GO:0032561 guanyl ribonucleotide binding  
e protein binding;GO:0005515 protein binding  
ng;GO:0005488 binding

dase activity, acting on L-amino acid peptides;GO:0008233 peptidase activity

09 kinase activator activity;GO:0019887 protein kinase regulator activity

e; (sce04141)Protein processing in endoplasmic reticulum

reticulum

; (sce00514)Other types of O-glycan biosynthesis; (sce01100)Metabolic pathways  
molecular\_function

0:0015238 drug transmembrane transporter activity;GO:0022857 transmembrane transporter ac  
A replication; (sce03420)Nucleotide excision repair  
20)Pyruvate metabolism; (sce01200)Carbon metabolism

0:0008175 tRNA methyltransferase activity;GO:0008173 RNA methyltransferase activity

:0008536 Ran GTPase binding;GO:0140142 nucleocytoplasmic carrier activity  
ce03013)RNA transport  
hagy - yeast; (sce04113)Meiosis - yeast  
osphatase activity;GO:0016462 pyrophosphatase activity  
me kinetochore;GO:0000780 condensed nuclear chromosome, centromeric region

(sce03013)RNA transport

: endoplasmic reticulum; diploid deletion strain has high budding index

in binding;GO:0005488 binding  
in processing in endoplasmic reticulum  
n binding;GO:0005488 binding  
e biogenesis in eukaryotes  
lism; (sce00230)Purine metabolism; (sce01100)Metabolic pathways

5'-UTR binding;GO:0036002 pre-mRNA binding

tein localizes to mitochondria

;GO:0008252 nucleotidase activity;GO:0016791 phosphatase activity  
0:0004672 protein kinase activity;GO:0016773 phosphotransferase activity, alcohol group a

ity;GO:0004721 phosphoprotein phosphatase activity;GO:0016791 phosphatase activity  
; (sce00460)Cyanoamino acid metabolism; (sce00480)Glutathione metabolism  
004721 phosphoprotein phosphatase activity;GO:0016791 phosphatase activity

tivity;GO:0003824 catalytic activity

phase, glucose 6P => ribulose 5P; (sce)Pentose phosphate pathway, oxidative phase, gluco  
emase and epimerase activity, acting on carbohydrates and derivatives;GO:0016854 racemase

ne metabolism; (sce00230)Purine metabolism  
27)GABA (gamma-Aminobutyrate) shunt; (sce00650)Butanoate metabolism  
oserine binding;GO:0099122 RNA polymerase II C-terminal domain binding;GO:0050815 phospho  
rsions; (sce00051)Fructose and mannose metabolism; (sce01100)Metabolic pathways  
:0022857 transmembrane transporter activity;GO:0005215 transporter activity  
e regulator activity;GO:0031072 heat shock protein binding  
16864 intramolecular oxidoreductase activity, transposing S-S bonds;GO:0015035 protein di  
g;GO:1901363 heterocyclic compound binding  
ecular transducer activity;GO:0003674 molecular\_function

itin-like protein transferase activity;GO:0140096 catalytic activity, acting on a protein  
0:0004672 protein kinase activity;GO:0016773 phosphotransferase activity, alcohol group a  
ein complex binding;GO:0003924 GTPase activity  
ansporter activity;GO:0003674 molecular\_function

005048 signal sequence binding;GO:0008565 protein transporter activity  
yl-CoA; (sce)Pyruvate oxidation, pyruvate => acetyl-CoA; (sce00640)Propanoate metabolism

binding;GO:0003677 DNA binding

03674 molecular\_function

488 binding;GO:0003674 molecular\_function  
anded DNA binding;GO:0140097 catalytic activity, acting on DNA  
ce04111)Cell cycle - yeast; (sce04113)Meiosis - yeast  
3676 nucleic acid binding  
A replication; (sce03420)Nucleotide excision repair  
nding;GO:0044877 protein-containing complex binding

vity;GO:0004467 long-chain fatty acid-CoA ligase activity;GO:0015645 fatty acid ligase ac

3285 monocarboxylic acid-transporting ATPase activity;GO:0033284 carboxylic acid-transporting

0000049 tRNA binding;GO:0008135 translation factor activity, RNA binding  
e activity;GO:0036459 thiol-dependent ubiquitinyl hydrolase activity;GO:0043022 ribosome  
pendent ATPase activity;GO:0042623 ATPase activity, coupled

sis - yeast

sm

y;GO:0016278 lysine N-methyltransferase activity;GO:0008276 protein methyltransferase act  
g;GO:0043167 ion binding

amin B6 binding;GO:0019842 vitamin binding

ce04111)Cell cycle - yeast; (sce04113)Meiosis - yeast

rotein localizes to the vacuole

1630 ubiquitin protein ligase activity;GO:0061659 ubiquitin-like protein ligase activity  
etabolism; (sce01100)Metabolic pathways

uctase activity, acting on peroxide as acceptor;GO:0016209 antioxidant activity

ce-specific DNA binding;GO:0000976 transcription regulatory region sequence-specific DNA

ne metabolism; (sce00230)Purine metabolism

0:0022857 transmembrane transporter activity;GO:0005215 transporter activity

0:0015038 glutathione disulfide oxidoreductase activity;GO:0015037 peptide disulfide oxid  
abolic pathways

215 transporter activity;GO:0003674 molecular\_function

ydroxyl-kinase activity;GO:0046403 polynucleotide 3'-phosphatase activity;GO:0051733 poly  
ce03040)Spliceosome

atory element binding;GO:0030371 translation repressor activity;GO:0090079 translation re  
;GO:0051020 GTPase binding;GO:0098772 molecular function regulator

8186 RNA-dependent ATPase activity;GO:0003724 RNA helicase activity

g;GO:0043167 ion binding

y;GO:0016278 lysine N-methyltransferase activity;GO:0008276 protein methyltransferase act

RNA polymerase II transcription factor binding;GO:0003713 transcription coactivator activ  
n binding;GO:0005488 binding

0:1901981 phosphatidylinositol phosphate binding;GO:0008565 protein transporter activity

733 peptide-lysine-N-acetyltransferase activity;GO:0034212 peptide N-acetyltransferase ac

amin B6 binding;GO:0019842 vitamin binding

:0048037 cofactor binding

osphatase activity;GO:0016462 pyrophosphatase activity

ce-specific DNA binding;GO:0000987 proximal promoter sequence-specific DNA binding;GO:000

etallopeptidase activity;GO:0004175 endopeptidase activity

0022843 voltage-gated cation channel activity;GO:0005262 calcium channel activity

ity;GO:0008094 DNA-dependent ATPase activity;GO:0042623 ATPase activity, coupled

e => UDP-galactose; (M00554)Nucleotide sugar biosynthesis, galactose => UDP-galactose; (s  
ular adaptor activity;GO:0005515 protein binding

:0042123 glucanosyltransferase activity;GO:0016740 transferase activity

ine metabolism; (sce00230)Purine metabolism

some

e; (sce04141)Protein processing in endoplasmic reticulum

00)Metabolic pathways

0008017 microtubule binding;GO:0015631 tubulin binding

sphorylation; (sce01100)Metabolic pathways

etic complications; (sce04144)Endocytosis; (sce04011)MAPK signaling pathway - yeast

0480)Glutathione metabolism

ce01100)Metabolic pathways

nologous recombination; (sce03430)Mismatch repair

movement of ions, phosphorylative mechanism;GO:0042625 ATPase coupled ion transmembrane t

0120013 intermembrane lipid transfer activity;GO:0015248 sterol transporter activity

e regulator activity;GO:0060589 nucleoside-triphosphatase regulator activity

6788 hydrolase activity, acting on ester bonds;GO:0016787 hydrolase activity

specific DNA binding;GO:0003677 DNA binding

ce-specific DNA binding;GO:0000987 proximal promoter sequence-specific DNA binding;GO:000

pendent ATPase activity;GO:0000978 RNA polymerase II proximal promoter sequence-specific  
2-oxoglutarate => oxaloacetate; (M00009)Citrate cycle (TCA cycle, Krebs cycle); (M00011)

pase activity;GO:0052689 carboxylic ester hydrolase activity

inding;GO:0008092 cytoskeletal protein binding

g;GO:1901363 heterocyclic compound binding

0019787 ubiquitin-like protein transferase activity;GO:0140096 catalytic activity, acting  
rsions; (sce00051)Fructose and mannose metabolism; (sce01100)Metabolic pathways

prolyl cis-trans isomerase activity;GO:0016859 cis-trans isomerase activity

prolyl cis-trans isomerase activity;GO:0016859 cis-trans isomerase activity

sis - yeast

otein deacetylase activity;GO:0019213 deacetylase activity

e activity;GO:0036459 thiol-dependent ubiquitinyl hydrolase activity;GO:0004197 cysteine-  
e01100)Metabolic pathways

0008135 translation factor activity, RNA binding;GO:0003723 RNA binding

e04070)Phosphatidylinositol signaling system; (sce01100)Metabolic pathways

e activity;GO:0016773 phosphotransferase activity, alcohol group as acceptor

orter activity;GO:0015291 secondary active transmembrane transporter activity

ein complex binding;GO:0031267 small GTPase binding

ate => H<sub>2</sub>S; (sce)Assimilatory sulfate reduction, sulfate => H<sub>2</sub>S; (sce00920)Sulfur metabol

674 molecular\_function

nding;GO:0046914 transition metal ion binding

ce04111)Cell cycle - yeast; (sce04113)Meiosis - yeast

ce-specific DNA binding;GO:0000987 proximal promoter sequence-specific DNA binding;GO:000  
ator activity;GO:0030695 GTPase regulator activity

y;GO:0008324 cation transmembrane transporter activity;GO:0015075 ion transmembrane trans

59 ubiquitin-like protein ligase activity;GO:0004842 ubiquitin-protein transferase activi

ed DNA binding;GO:0019787 ubiquitin-like protein transferase activity

itin-like protein transferase activity;GO:0140096 catalytic activity, acting on a protein

Sm-like protein family complex;GO:0005681 spliceosomal complex  
 > CoA; (M00120)Coenzyme A biosynthesis, pantothenate => CoA; (sce00770)Pantothenate and C

phosphatase activity;GO:0043175 RNA polymerase core enzyme binding;GO:0004722 protein ser  
 binding;GO:0030246 carbohydrate binding  
 ce04111)Cell cycle - yeast; (sce04113)Meiosis - yeast  
 pecific DNA binding;GO:0001046 core promoter sequence-specific DNA binding;GO:0001047 cor

histone kinase activity;GO:0004674 protein serine/threonine kinase activity  
 minus-end-directed;GO:0008574 ATP-dependent microtubule motor activity, plus-end-directed

nthesis of antibiotics; (sce01110)Biosynthesis of secondary metabolites

otein deacetylase activity;GO:0019213 deacetylase activity

ospholipid binding;GO:0008289 lipid binding  
 :0008139 nuclear localization sequence binding;GO:0140142 nucleocytoplasmic carrier activ

;GO:0034212 peptide N-acetyltransferase activity;GO:0008080 N-acetyltransferase activity  
 rotubule binding;GO:0015631 tubulin binding

ce04111)Cell cycle - yeast

0003688 DNA replication origin binding;GO:0008301 DNA binding, bending  
 3676 nucleic acid binding

se => UDP-glucose; (sce)Nucleotide sugar biosynthesis, glucose => UDP-glucose; (sce00040)

hosphatase activity;GO:0016462 pyrophosphatase activity  
 sphorylation; (sce01100)Metabolic pathways  
 olic pathways

0016410 N-acyltransferase activity;GO:0016747 transferase activity, transferring acyl gro

GO:0034458 3'-5' RNA helicase activity;GO:0004004 ATP-dependent RNA helicase activity

09982 pseudouridine synthase activity;GO:0016866 intramolecular transferase activity

e transporter activity;GO:0015191 L-methionine transmembrane transporter activity;GO:1901  
vity;GO:0005088 Ras guanyl-nucleotide exchange factor activity;GO:0017137 Rab GTPase bind  
0019787 ubiquitin-like protein transferase activity;GO:0140096 catalytic activity, acting  
A replication; (sce03420)Nucleotide excision repair

GO:0016811 hydrolase activity, acting on carbon-nitrogen (but not peptide) bonds, in line  
ne metabolism; (sce00230)Purine metabolism

ine metabolism; (sce00230)Purine metabolism  
GO:0016747 transferase activity, transferring acyl groups other than amino-acyl groups;GO  
id transporter activity;GO:0005215 transporter activity  
O:0004672 protein kinase activity;GO:0016773 phosphotransferase activity, alcohol group a  
etabolic pathways  
g;GO:0003723 RNA binding

ivity;GO:0005302 L-tyrosine transmembrane transporter activity;GO:0015186 L-glutamine tra  
0019787 ubiquitin-like protein transferase activity;GO:0140096 catalytic activity, acting  
activity;GO:0015171 amino acid transmembrane transporter activity;GO:0046943 carboxylic

ng;GO:0032559 adenylyl ribonucleotide binding  
de binding;GO:0032561 guanylyl ribonucleotide binding

uence-specific DNA binding;GO:0003677 DNA binding  
g;GO:1901363 heterocyclic compound binding  
sporter activity;GO:0017016 Ras GTPase binding

lap endonuclease activity;GO:0016888 endodeoxyribonuclease activity, producing 5'-phospho

e01100)Metabolic pathways

; data; partially overlaps dubious ORF YBR056C-B; YBR056W-A has a paralog, YDR034W-B, that

ein complex binding;GO:0044877 protein-containing complex binding

ular adaptor activity;GO:0005515 protein binding  
urine metabolism

olic pathways  
activity;GO:0008514 organic anion transmembrane transporter activity;GO:0005342 organic a  
te => phenylalanine; (sce)Phenylalanine biosynthesis, chorismate => phenylalanine; (sce00



hagy - yeast; (sce04011)MAPK signaling pathway - yeast

ce04141)Protein processing in endoplasmic reticulum

0101 catalytic activity, acting on a tRNA;G0:0140098 catalytic activity, acting on RNA

00230)Purine metabolism

5'-exoribonuclease activity;G0:0016896 exoribonuclease activity, producing 5'-phosphomono

ity;G0:0015606 spermidine transmembrane transporter activity;G0:0015204 urea transmembran  
pendent ATPase activity;G0:0042623 ATPase activity, coupled

olic pathways

sis - yeast

g;G0:1901363 heterocyclic compound binding

00)Metabolic pathways

embrane;G0:0044232 organelle membrane contact site

ng pathway

ne metabolism; (sce00230)Purine metabolism

RNA polymerase II-specific;G0:0008270 zinc ion binding;G0:0043565 sequence-specific DNA

;G0:1901682 sulfur compound transmembrane transporter activity;G0:0015103 inorganic anion

hosphatase activity;G0:0016462 pyrophosphatase activity

ty;G0:0016755 transferase activity, transferring amino-acyl groups;G0:0016746 transferase

g;G0:1901363 heterocyclic compound binding

tivity;G0:0046873 metal ion transmembrane transporter activity;G0:0022890 inorganic catio

ferring) activity;G0:0016624 oxidoreductase activity, acting on the aldehyde or oxo group

ty, RNA polymerase II-specific;G0:0000978 RNA polymerase II proximal promoter sequence-sp

vity;G0:0005313 L-glutamate transmembrane transporter activity;G0:0015292 uniporter activ

ansporter activity;G0:0003674 molecular\_function

6788 hydrolase activity, acting on ester bonds;G0:0016787 hydrolase activity

hiamine metabolism; (sce04111)Cell cycle - yeast  
activity;GO:0140097 catalytic activity, acting on DNA

PRPP + glutamine => IMP; (sce)Inosine monophosphate biosynthesis, PRPP + glutamine => IMP  
specific);GO:0018024 histone-lysine N-methyltransferase activity;GO:0016279 protein-lysin  
;GO:0015175 neutral amino acid transmembrane transporter activity;GO:0015179 L-amino acid  
ity;GO:0052690 trichloro-p-hydroquinone reductive dehalogenase activity;GO:0003959 NADPH  
promoter binding;GO:0003714 transcription corepressor activity  
440)Homologous recombination

ic compound binding;GO:0097159 organic cyclic compound binding

5)N-glycan precursor biosynthesis; (sce00510)N-Glycan biosynthesis

ubiquitin-protein transferase activity;GO:0019787 ubiquitin-like protein transferase acti  
reabsorption; (hsa04722)Neurotrophin signaling pathway

hiamine metabolism; (sce01100)Metabolic pathways  
tivity;GO:0005385 zinc ion transmembrane transporter activity;GO:0072509 divalent inorgan  
kinase regulator activity;GO:0019887 protein kinase regulator activity;GO:0019207 kinase  
NA end binding;GO:0032135 DNA insertion or deletion binding

helicase activity;GO:0004386 helicase activity

iphosphatase activity;GO:0016462 pyrophosphatase activity

0:0004672 protein kinase activity;GO:0016773 phosphotransferase activity, alcohol group a  
;GO:0004559 alpha-mannosidase activity;GO:0015923 mannosidase activity

reticulum

lism; (sce01100)Metabolic pathways  
GO:0043140 ATP-dependent 3'-5' DNA helicase activity;GO:0043139 5'-3' DNA helicase activi  
ansport

098847 sequence-specific single stranded DNA binding;GO:0042162 telomeric DNA binding  
0032550 purine ribonucleoside binding  
9 ubiquitin-like protein ligase binding;GO:0019899 enzyme binding

733 peptide-lysine-N-acetyltransferase activity;GO:0034212 peptide N-acetyltransferase ac  
ce01100)Metabolic pathways

sis - yeast

0:0070273 phosphatidylinositol-4-phosphate binding;GO:1901981 phosphatidylinositol phosphorylation; (sce01100)Metabolic pathways

, <i>Ashbya gossypii</i> and other related yeasts; SWAT-GFP and mCherry fusion proteins lc  
0008135 translation factor activity, RNA binding;GO:0005085 guanyl-nucleotide exchange fa  
n; (hsa02010)ABC transporters; (hsa04976)Bile secretion

e regulator activity;GO:0098772 molecular function regulator  
ity;GO:0046943 carboxylic acid transmembrane transporter activity;GO:0008514 organic anio  
se => UDP-glucose; (sce)Nucleotide sugar biosynthesis, glucose => UDP-glucose; (sce00051)l

042578 phosphoric ester hydrolase activity;GO:0016788 hydrolase activity, acting on ester  
etabolic pathways

198 structural molecule activity;GO:0003674 molecular\_function  
sitol-4,5-bisphosphate binding;GO:1902936 phosphatidylinositol bisphosphate binding  
e04011)MAPK signaling pathway - yeast

ase activity;GO:1990189 peptide-serine-N-acetyltransferase activity;GO:0004596 peptide al  
ic activity;GO:0003674 molecular\_function

hosphatase activity;GO:0016462 pyrophosphatase activity

ular adaptor activity;GO:0005515 protein binding  
e regulator activity;GO:0098772 molecular function regulator  
198 structural molecule activity;GO:0003674 molecular\_function

etabolic pathways  
itin-protein transferase activity;GO:0060090 molecular adaptor activity  
e regulator activity;GO:0098772 molecular function regulator  
cle - yeast; (sce04113)Meiosis - yeast

e activity;GO:0036459 thiol-dependent ubiquitinyl hydrolase activity;GO:0004197 cysteine-

acyltransferase activity;GO:0016407 acetyltransferase activity

PRPP + glutamine => IMP; (sce)Inosine monophosphate biosynthesis, PRPP + glutamine => IMP  
RNA polymerase II-specific;GO:0043565 sequence-specific DNA binding;GO:0003700 DNA-bindi

ty;GO:0015175 neutral amino acid transmembrane transporter activity;GO:0015179 L-amino ac

some



8186 RNA-dependent ATPase activity;GO:0003724 RNA helicase activity

y;GO:0072509 divalent inorganic cation transmembrane transporter activity;GO:0046915 tran

8186 RNA-dependent ATPase activity;GO:0003724 RNA helicase activity  
;GO:0005488 binding

5198 structural molecule activity;GO:0003674 molecular\_function

ing, bridging;GO:0060090 molecular adaptor activity

olic pathways

03674 molecular\_function

03674 molecular\_function

de binding;GO:0032561 guanyl ribonucleotide binding

otein deacetylase activity;GO:0019213 deacetylase activity

smatch repair; (sce03030)DNA replication

tipole species; (sce04138)Autophagy - yeast; (sce04113)Meiosis - yeast

0019787 ubiquitin-like protein transferase activity;GO:0140096 catalytic activity, acting  
on profiling and mass spectrometry

0:0004672 protein kinase activity;GO:0016773 phosphotransferase activity, alcohol group a

00)Metabolic pathways

g;GO:0043167 ion binding

translation initiation factor activity;GO:0008135 translation factor activity, RNA bindi

3420)Nucleotide excision repair

ce-specific DNA binding;GO:0000987 proximal promoter sequence-specific DNA binding;GO:000  
733 peptide-lysine-N-acetyltransferase activity;GO:0034212 peptide N-acetyltransferase ac

is; (sce00513)Various types of N-glycan biosynthesis; (sce01100)Metabolic pathways  
;GO:1904680 peptide transmembrane transporter activity;GO:0022884 macromolecule transmemb  
e-specific DNA binding;GO:0001003 RNA polymerase III type 2 promoter sequence-specific DN  
0:0016833 oxo-acid-lyase activity;GO:0010181 FMN binding

hagy - yeast

ed DNA binding;GO:0003723 RNA binding  
9 ubiquitin-like protein ligase binding;GO:0019899 enzyme binding  
nding;GO:0000977 RNA polymerase II regulatory region sequence-specific DNA binding;GO:000  
Glycerophospholipid metabolism; (sce01100)Metabolic pathways

homoserine => threonine; (sce)Threonine biosynthesis, aspartate => homoserine => threonine  
intramolecular transferase activity;GO:0016853 isomerase activity  
n binding;GO:0005488 binding

3676 nucleic acid binding  
lecular\_function

ce-specific DNA binding;GO:0000987 proximal promoter sequence-specific DNA binding;GO:000  
signaling pathway - yeast

ity;GO:0005385 zinc ion transmembrane transporter activity;GO:0072509 divalent inorganic

0:0004672 protein kinase activity;GO:0016773 phosphotransferase activity, alcohol group a

e-specific DNA binding;GO:0001003 RNA polymerase III type 2 promoter sequence-specific DN

ne metabolism; (sce00230)Purine metabolism  
rotein localizes to the mitochondrion  
0138 ubiquitin-like protein-specific isopeptidase activity;GO:0016929 SUMO-specific prote  
1100)Metabolic pathways  
sferase activity, transferring one-carbon groups;GO:0016740 transferase activity  
n corepressor activity;GO:0003712 transcription coregulator activity  
molecular\_function  
sis - yeast  
specific DNA binding;GO:0003677 DNA binding  
ular adaptor activity;GO:0005515 protein binding

A binding;GO:0035613 RNA stem-loop binding

676 nucleic acid binding

ing;GO:0070273 phosphatidylinositol-4-phosphate binding;GO:0032266 phosphatidylinositol-3  
4 molecular\_function  
ular adaptor activity;GO:0005515 protein binding  
19843 rRNA binding;GO:0003735 structural constituent of ribosome  
sce01110)Biosynthesis of secondary metabolites

prolyl cis-trans isomerase activity;GO:0016859 cis-trans isomerase activity

e pole body;GO:0044450 microtubule organizing center part  
tivity;GO:0003674 molecular\_function

RNA polymerase II-specific;GO:0044212 transcription regulatory region DNA binding;GO:000  
92 RNA guanylyltransferase activity;GO:0070568 guanylyltransferase activity  
008536 Ran GTPase binding;GO:0005048 signal sequence binding  
ein complex binding;GO:0000981 DNA-binding transcription factor activity, RNA polymerase  
ome binding;GO:0031490 chromatin DNA binding  
ansport; (sce04138)Autophagy - yeast

0044877 protein-containing complex binding;GO:0005488 binding  
19843 rRNA binding;GO:0043021 ribonucleoprotein complex binding  
008253 5'-nucleotidase activity;GO:0008252 nucleotidase activity

n; (sce)Valine/isoleucine biosynthesis, pyruvate => valine / 2-oxobutanoate => isoleucine  
sphorylation; (sce01100)Metabolic pathways  
mRNA binding;GO:0003723 RNA binding  
NA binding;GO:0003676 nucleic acid binding

tor activity;GO:0019208 phosphatase regulator activity

reticulum  
ine metabolism; (sce00230)Purine metabolism

inding;GO:0031267 small GTPase binding  
2-oxoglutarate => oxaloacetate; (M00009)Citrate cycle (TCA cycle, Krebs cycle); (M00011)C  
01130)Biosynthesis of antibiotics; (sce01110)Biosynthesis of secondary metabolites

0032550 purine ribonucleoside binding  
hosphodiesterase I activity;GO:0047429 nucleoside-triphosphate diphosphatase activity

ular function regulator;GO:0003674 molecular\_function

ce04111)Cell cycle - yeast; (sce04113)Meiosis - yeast  
00)Metabolic pathways

;GO:1904680 peptide transmembrane transporter activity;GO:0022884 macromolecule transmemb  
5249 voltage-gated potassium channel activity;GO:0022840 leak channel activity

ular adaptor activity;GO:0005515 protein binding  
;GO:0003682 chromatin binding  
674 molecular\_function

GO:0005272 sodium channel activity;GO:0005262 calcium channel activity  
ty;GO:0015238 drug transmembrane transporter activity;GO:0022857 transmembrane transporte

lycerol degradation; (sce00561)Glycerolipid metabolism  
peroxiredoxin activity;GO:0004601 peroxidase activity

activity, hydrolyzing O-glycosyl compounds;GO:0016798 hydrolase activity, acting on glyco

13)Meiosis - yeast

r hydrolase activity;GO:0016801 hydrolase activity, acting on ether bonds

(sce03013)RNA transport  
ic activity;GO:0003674 molecular\_function  
is (ALS)  
activity;GO:0008948 oxaloacetate decarboxylase activity;GO:0016833 oxo-acid-lyase activi

nding;GO:0032559 adenylyl ribonucleotide binding  
3676 nucleic acid binding  
rt  
ne metabolism; (sce00230)Purine metabolism

tivity;GO:0046915 transition metal ion transmembrane transporter activity;GO:0015085 calc  
82 copper-transporting ATPase activity;GO:0015086 cadmium ion transmembrane transporter a  
733 peptide-lysine-N-acetyltransferase activity;GO:0034212 peptide N-acetyltransferase ac

on in cancer

fic DNA binding;GO:0046914 transition metal ion binding  
sis - yeast

bolism; (sce01230)Biosynthesis of amino acids; (sce01130)Biosynthesis of antibiotics  
ase activity;GO:0016887 ATPase activity

;GO:0060590 ATPase regulator activity;GO:0017056 structural constituent of nuclear pore

y;GO:0004322 ferroxidase activity;GO:0016724 oxidoreductase activity, oxidizing metal ion

4 molecular\_function



tein binding;GO:0043022 ribosome binding  
sphorylation; (sce01100)Metabolic pathways  
in binding;GO:0030234 enzyme regulator activity  
ce04111)Cell cycle - yeast  
pase activity;GO:0052689 carboxylic ester hydrolase activity

iphosphatase activity;GO:0016462 pyrophosphatase activity  
0005543 phospholipid binding;GO:0008289 lipid binding  
is - yeast  
e regulator activity;GO:0098772 molecular function regulator

ding, bending;GO:1990837 sequence-specific double-stranded DNA binding  
reticulum  
0005402 carbohydrate:cation symporter activity;GO:0015295 solute:proton symporter activit  
0)Tyrosine metabolism; (sce00220)Arginine biosynthesis

cle - yeast; (sce04113)Meiosis - yeast

GO:0003674 molecular\_function

pendent ATPase activity;GO:0042623 ATPase activity, coupled  
e activity;GO:0036459 thiol-dependent ubiquitinyl hydrolase activity;GO:0004197 cysteine-  
0:0003676 nucleic acid binding  
ic activity;GO:0003674 molecular\_function  
GO:0043021 ribonucleoprotein complex binding

0015138 fumarate transmembrane transporter activity;GO:0015141 succinate transmembrane tr  
e activity;GO:0036459 thiol-dependent ubiquitinyl hydrolase activity;GO:0019783 ubiquitin  
-directed 5'-3' RNA polymerase activity;GO:0034062 5'-3' RNA polymerase activity

:0017111 nucleoside-triphosphatase activity  
ty;GO:0015297 antiporter activity;GO:0015291 secondary active transmembrane transporter a  
roline; (sce)Proline biosynthesis, glutamate => proline; (sce00330)Arginine and proline m

674 molecular\_function

ansporter activity;GO:0003674 molecular\_function

translation activator activity;GO:0090079 translation regulator activity, nucleic acid bi

ansferase activity, transferring hexosyl groups;GO:0016757 transferase activity, transfer  
0)Mismatch repair; (sce03030)DNA replication  
pendent ATPase activity;GO:0042623 ATPase activity, coupled

e04011)MAPK signaling pathway - yeast  
e regulator activity;GO:0060589 nucleoside-triphosphatase regulator activity

e; (M00074)N-glycan biosynthesis, high-mannose type; (sce00513)Various types of N-glycan  
tein-containing complex binding;GO:0003723 RNA binding  
ity;GO:0016423 tRNA (guanine) methyltransferase activity;GO:0008175 tRNA methyltransferas  
ity;GO:0071077 adenosine 3',5'-bisphosphate transmembrane transporter activity;GO:0000295

5198 structural molecule activity;GO:0003674 molecular\_function

phorylation; (sce01100)Metabolic pathways

236 serine-type peptidase activity;GO:0017171 serine hydrolase activity

s spectrometry  
kinase regulator activity;GO:0019887 protein kinase regulator activity;GO:0019207 kinase  
inding;GO:0043169 cation binding

sis - yeast  
sm; (sce01110)Biosynthesis of secondary metabolites; (sce01100)Metabolic pathways  
0)Tryptophan metabolism; (sce00330)Arginine and proline metabolism  
40)Spliceosome; (sce03013)RNA transport  
nsporter activity;GO:0015301 anion:anion antiporter activity;GO:0015116 sulfate transmemb

nsferase; (sce)N-glycosylation by oligosaccharyltransferase; (sce00510)N-Glycan biosynthe  
ing;GO:0048037 cofactor binding

factor binding;GO:0070491 repressing transcription factor binding;GO:0001085 RNA polymer  
in-DNA loading ATPase activity;GO:0008094 DNA-dependent ATPase activity  
ansport

se => UDP-glucose; (sce)Nucleotide sugar biosynthesis, glucose => UDP-glucose; (sce00040)1  
0019787 ubiquitin-like protein transferase activity;GO:0140096 catalytic activity, acting  
cle - yeast; (sce04113)Meiosis - yeast

lism; (sce04213)Longevity regulating pathway - multiple species; (sce01100)Metabolic path  
n binding;GO:0005488 binding  
g;GO:0051787 misfolded protein binding;GO:0031072 heat shock protein binding  
e activity;GO:0036459 thiol-dependent ubiquitinyl hydrolase activity;GO:0004197 cysteine-

mary transcript binding;GO:0034513 box H/ACA snoRNA binding  
 oserine binding;GO:0099122 RNA polymerase II C-terminal domain binding;GO:0050815 phospho  
 porter activity;GO:0051185 coenzyme transmembrane transporter activity;GO:0051184 cofact  
  
 ane transporter activity;GO:0015142 tricarboxylic acid transmembrane transporter activity  
 rotubule binding;GO:0015631 tubulin binding  
 vity regulating pathway - multiple species; (sce04139)Mitophagy - yeast  
 nsferase; (sce)N-glycosylation by oligosaccharyltransferase; (sce00510)N-Glycan biosynthe  
  
  
 y;GO:0016278 lysine N-methyltransferase activity;GO:0008276 protein methyltransferase act  
 ty;GO:0005516 calmodulin binding;GO:0004674 protein serine/threonine kinase activity  
  
 olymerase activity;GO:0034061 DNA polymerase activity  
  
  
 de binding;GO:0030554 adenylyl nucleotide binding  
  
 0003697 single-stranded DNA binding;GO:0005543 phospholipid binding  
  
  
 :0008308 voltage-gated anion channel activity;GO:0015299 solute:proton antiporter activit  
 e protein binding;GO:0005198 structural molecule activity  
  
 198 structural molecule activity;GO:0003674 molecular\_function  
  
 ity;GO:0046915 transition metal ion transmembrane transporter activity;GO:0046873 metal i  
 0005402 carbohydrate:cation symporter activity;GO:0015295 solute:proton symporter activit  
  
  
  
  
 na R-mediated phagocytosis; (hsa04360)Axon guidance  
 ansport  
  
  
  
 > CoA; (M00120)Coenzyme A biosynthesis, pantothenate => CoA; (sce00770)Pantothenate and C  
  
 vity;GO:0016462 pyrophosphatase activity;GO:0016818 hydrolase activity, acting on acid an  
 5198 structural molecule activity;GO:0003674 molecular\_function  
 binding;GO:0005488 binding  
 ptidase regulator activity;GO:0004857 enzyme inhibitor activity  
 ty, RNA polymerase II-specific;GO:0000981 DNA-binding transcription factor activity, RNA  
 0:0008175 tRNA methyltransferase activity;GO:0016706 oxidoreductase activity, acting on p  
 signaling pathway - yeast



0043022 ribosome binding;GO:0008135 translation factor activity, RNA binding  
 4 molecular\_function  
 02010)ABC transporters; (hsa04976)Bile secretion  
 lism; (sce01100)Metabolic pathways  
 species

rosclerosis; (hsa04621)NOD-like receptor signaling pathway  
 3676 nucleic acid binding  
 ;GO:1904680 peptide transmembrane transporter activity;GO:0022884 macromolecule transmembr  
 vity;GO:1990189 peptide-serine-N-acetyltransferase activity;GO:0004596 peptide alpha-N-ac  
 0003714 transcription corepressor activity;GO:0003712 transcription coregulator activity

061650 ubiquitin-like protein conjugating enzyme activity;GO:0016874 ligase activity

34061 DNA polymerase activity;GO:0003684 damaged DNA binding  
 04497 monooxygenase activity;GO:0016705 oxidoreductase activity, acting on paired donors,

;GO:0015214 pyrimidine nucleoside transmembrane transporter activity;GO:0005337 nucleosid  
 n binding;GO:0008092 cytoskeletal protein binding

6616 oxidoreductase activity, acting on the CH-OH group of donors, NAD or NADP as accepto  
 activity;GO:0003674 molecular\_function

13)RNA transport  
 ty;GO:0003924 GTPase activity;GO:0005525 GTP binding

20)Sulfur metabolism; (sce00270)Cysteine and methionine metabolism

lycerol degradation; (sce00561)Glycerolipid metabolism

e => UDP-galactose; (M00554)Nucleotide sugar biosynthesis, galactose => UDP-galactose; (s

um ion binding;GO:0030234 enzyme regulator activity  
 holipase activity;GO:0016298 lipase activity  
 vity;GO:0005088 Ras guanyl-nucleotide exchange factor activity;GO:0017137 Rab GTPase bind

nologous recombination; (sce03430)Mismatch repair  
 phosphatase regulator activity;GO:0030346 protein phosphatase 2B binding;GO:0019888 prot  
 gnaling adaptor activity;GO:0032947 protein-containing complex scaffold activity  
 e regulator activity;GO:0060589 nucleoside-triphosphatase regulator activity

sis - ganglio series; (hsa01100)Metabolic pathways

;GO:0005488 binding  
nding;GO:0032559 adenylyl ribonucleotide binding  
ein complex binding;GO:0044877 protein-containing complex binding  
;GO:1904680 peptide transmembrane transporter activity;GO:0022884 macromolecule transmembrane => cysteine; (M00338)Cysteine biosynthesis, homocysteine + serine => cysteine; (sce

kinase regulator activity;GO:0015248 sterol transporter activity;GO:0019887 protein kinas

ity;GO:0015037 peptide disulfide oxidoreductase activity;GO:0015035 protein disulfide oxidase activity;GO:0004112 cyclic-nucleotide phosphodiesterase activity;GO:0008081 phosphoric acid;GO:0015175 neutral amino acid transmembrane transporter activity;GO:0015179 L-amino acid

ty;GO:0022857 transmembrane transporter activity;GO:0005215 transporter activity  
rase complex;GO:0043189 H4/H2A histone acetyltransferase complex













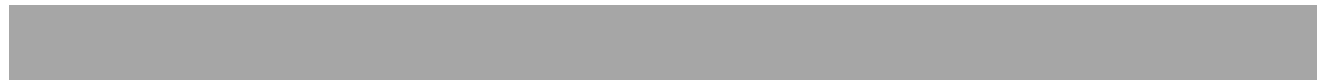

porter activity

er activity

r transmembrane transporter activity

onors, with incorporation or reduction of molecular oxygen, NAD(P)H as one donor, and inc

cycle)

ivity;G0:1901474 azole transmembrane transporter activity

inding

0016491 oxidoreductase activity

on transmembrane transporter activity

inding

coupled to transmembrane movement of ions, phosphorylative mechanism  
s acceptor

mbrane transporter activity

s, oxygen as acceptor

se 6P => ribulose 5P; (M00004)Pentose phosphate pathway (Pentose phosphate cycle)

embrane transporter activity

metabolism

mbrane transporter activity

g metal ions, NAD or NADP as acceptor

y

Fructose and mannose metabolism

1; computational analysis of large-scale protein-protein interaction data suggests a role

id transmembrane transporter activity

, fructose 6P => ribose 5P; (M00004)Pentose phosphate pathway (Pentose phosphate cycle)  
015405 P-P-bond-hydrolysis-driven transmembrane transporter activity

orporation or reduction of molecular oxygen

ine-dependent methyltransferase activity

015405 P-P-bond-hydrolysis-driven transmembrane transporter activity

transmembrane transporter activity

membrane transporter activity

UMP; (sce00240)Pyrimidine metabolism

omatic amino acid transmembrane transporter activity

003)Gluconeogenesis, oxaloacetate => fructose-6P

holipid metabolism

er binding

acceptor;G0:0016614 oxidoreductase activity, acting on CH-OH group of donors

species

bone biosynthesis

1228 DNA-binding transcription activator activity, RNA polymerase II-specific  
lism

sporter activity

acid transmembrane transporter activity

16701 oxidoreductase activity, acting on single donors with incorporation of molecular ox

bone biosynthesis

ase II transcription factor binding

ed fatty acids  
te => 2-oxoglutarate; (M00012)Glyoxylate cycle  
of antibiotics

TCA cycle, Krebs cycle)

bone biosynthesis

ansporter activity

g metal ions, NAD or NADP as acceptor

brane transporter activity

043022 ribosome binding

ransporter activity

acceptor;G0:0016614 oxidoreductase activity, acting on CH-OH group of donors  
activity, transferring glycosyl groups

the aldehyde or oxo group of donors, NAD or NADP as acceptor  
lism

G0:0008556 potassium-transporting ATPase activity

003)Gluconeogenesis, oxaloacetate => fructose-6P

binding

id transmembrane transporter activity

inase activity

syl bonds



, fructose 6P => ribose 5P; (M00004)Pentose phosphate pathway (Pentose phosphate cycle)  
vity, acting on the CH-OH group of donors, NAD or NADP as acceptor

s acceptor

factor binding

ty

Autophagy - yeast

ne transporter activity

s acceptor  
activity  
TCA cycle, Krebs cycle)

organic cation transmembrane transporter activity

P as acceptor;GO:0016903 oxidoreductase activity, acting on the aldehyde or oxo group of

s acceptor

0977 RNA polymerase II regulatory region sequence-specific DNA binding

polymerase II proximal promoter sequence-specific DNA binding

e

s acceptor

bone biosynthesis

P as acceptor;GO:0016903 oxidoreductase activity, acting on the aldehyde or oxo group of

10 transcription regulator activity

oreductase activity

or activity

use from a single-locus duplication

003)Gluconeogenesis, oxaloacetate => fructose-6P

ific DNA-binding transcription factor binding;GO:0001085 RNA polymerase II transcription

on metal ion transmembrane transporter activity  
type endopeptidase activity

tarate => 2-aminoadipate => lysine; (sce00300)Lysine biosynthesis

biotics  
;GO:0016655 oxidoreductase activity, acting on NAD(P)H, quinone or similar compound as ac  
ase II transcription factor binding  
cceptor;GO:0016649 oxidoreductase activity, acting on the CH-NH group of donors, quinone

Fructose and mannose metabolism  
s acceptor

acceptor;GO:0016614 oxidoreductase activity, acting on CH-OH group of donors

polymerase II-specific;GO:0043565 sequence-specific DNA binding

070491 repressing transcription factor binding  
ivity  
reases in response to DNA replication stress  
inorganic cation transmembrane transporter activity  
ty;GO:0015205 nucleobase transmembrane transporter activity

ways

activity

s acceptor

Galactose metabolism

binding  
-like protein-specific protease activity

biosynthesis

transcription factor binding

003)Gluconeogenesis, oxaloacetate => fructose-6P

tivity, coupled to transmembrane movement of substances

003)Gluconeogenesis, oxaloacetate => fructose-6P

polymerase II-specific;G0:0008270 zinc ion binding

porter activity

e activity

ctivity, acting on a sulfur group of donors, quinone or similar compound as acceptor  
ysis (Embden-Meyerhof pathway), glucose => pyruvate  
compounds

015405 P-P-bond-hydrolysis-driven transmembrane transporter activity

s acceptor

ivity

te => 2-oxoglutarate; (M00012)Glyoxylate cycle

1228 DNA-binding transcription activator activity, RNA polymerase II-specific

, core module involving three-carbon compounds

binding

003)Gluconeogenesis, oxaloacetate => fructose-6P

ctivity

in-specific protease activity

tivator activity

.evated by sulfur limitation; YIL166C is a non-essential gene

brane transporter activity

on a protein

tivity

d transmembrane transporter activity

id transmembrane transporter activity

se 6P => ribulose 5P; (M00004)Pentose phosphate pathway (Pentose phosphate cycle)

tabolism

ng transcription factor activity

se 6P => ribulose 5P; (M00004)Pentose phosphate pathway (Pentose phosphate cycle)

-phosphate binding

city to 4-(N-(S-glutathionylacetyl)amino) phenylarsenoxide (GSA0)

bone biosynthesis

ansporter activity;G0:0005337 nucleoside transmembrane transporter activity

ontaining groups

ase II transcription factor binding

biosynthesis, AAA pathway, 2-oxoglutarate => 2-aminoadipate => lysine

acceptor;G0:0016614 oxidoreductase activity, acting on CH-OH group of donors

; (M00019)Valine/isoleucine biosynthesis, pyruvate => valine / 2-oxobutanoate => isoleuci

activity  
olism

onuclease activity

holipid metabolism

ity

tive transmembrane transporter activity

binding



ate => valine / 2-oxobutanoate => isoleucine; (sce)Isoleucine biosynthesis, threonine =>  
015405 P-P-bond-hydrolysis-driven transmembrane transporter activity  
oate => ubiquinone; (sce00130)Ubiquinone and other terpenoid-quinone biosynthesis

06018 phosphatidylinositol-3,5-bisphosphate phosphatase activity

: transcriptional regulator Ume6p; YIR014W is a non-essential gene

ivity  
1228 DNA-binding transcription activator activity, RNA polymerase II-specific  
binding

Fructose and mannose metabolism

ctivity

pyruvate  
UMP; (sce00250)Alanine, aspartate and glutamate metabolism

e

ne; (sce00750)Vitamin B6 metabolism  
GO:0008556 potassium-transporting ATPase activity

id transmembrane transporter activity

ivity

ransporter activity

4P => chorismate; (sce00400)Phenylalanine, tyrosine and tryptophan biosynthesis

yltransferase activity

oreductase activity

rane transporter activity

1228 DNA-binding transcription activator activity, RNA polymerase II-specific

on a protein

zing metal ions, NAD or NADP as acceptor

te => 2-oxoglutarate; (M00012)Glyoxylate cycle

ay

ransporter activity

and epimerase activity

m

rane transporter activity

te => 2-oxoglutarate; (M00009)Citrate cycle (TCA cycle, Krebs cycle)

ways

se metabolism

ansferring one-carbon groups

y, forming carbon-sulfur bonds

nding

0977 RNA polymerase II regulatory region sequence-specific DNA binding

acid transmembrane transporter activity

l groups

-CH group of donors, NAD or NADP as acceptor  
biosynthesis, AAA pathway, 2-oxoglutarate => 2-aminoadipate => lysine

ds;G0:0016798 hydrolase activity, acting on glycosyl bonds

e activity

polymerase II-specific;GO:0043565 sequence-specific DNA binding  
;GO:0000981 DNA-binding transcription factor activity, RNA polymerase II-specific

(NADP+) activity

bone biosynthesis

binding

y

e degradation

rased activity

transmembrane transporter activity

ansmembrane transporter activity

ty

erol 0-acyltransferase activity

y;G0:0051998 protein carboxyl 0-methyltransferase activity

activity, transferring glycosyl groups

UMP; (sce00250)Alanine, aspartate and glutamate metabolism

anine, tyrosine and tryptophan biosynthesis  
rine/threonine kinase activity

ecific DNA binding;G0:0000987 proximal promoter sequence-specific DNA binding

se metabolism

sulfur compound transmembrane transporter activity

oate => ubiquinone; (sce00130)Ubiquinone and other terpenoid-quinone biosynthesis

Galactose metabolism

ing

rane transporter activity  
sferase activity

s acceptor

ivity  
tivity  
0016491 oxidoreductase activity

s acceptor

D activity;G0:0004620 phospholipase activity

hate 1-kinase activity

leotide-sugar transmembrane transporter activity

0977 RNA polymerase II regulatory region sequence-specific DNA binding  
s acceptor  
ivity  
nthesis

polymerase II repressing transcription factor binding

(sce00260)Glycine, serine and threonine metabolism  
ption factor recruiting activity;G0:0001030 RNA polymerase III type 1 promoter DNA bindi

4P => chorismate; (sce00400)Phenylalanine, tyrosine and tryptophan biosynthesis  
y

polymerase II-specific;G0:0043565 sequence-specific DNA binding

biosynthesis, AAA pathway, 2-oxoglutarate => 2-aminoadipate => lysine

ive with either ribo- or deoxyribonucleic acids and producing 3'-phosphomonoesters  
ctivity  
e activity

id transmembrane transporter activity

ng transcription factor activity



1228 DNA-binding transcription activator activity, RNA polymerase II-specific

rane transporter activity

ism

anine, tyrosine and tryptophan biosynthesis

ctivity, active with either ribo- or deoxyribonucleic acids and producing 5'-phosphomonoester  
transmembrane transporter activity

ide-methionine (S)-S-oxide reductase activity

activity, RNA polymerase II-specific

transmembrane transporter activity

/threonine kinase activity

type endopeptidase activity

ase activity

ate tetrakisphosphate diphosphatase activity

se 6P => ribulose 5P; (M00004)Pentose phosphate pathway (Pentose phosphate cycle)

brane transporter activity;GO:0035673 oligopeptide transmembrane transporter activity  
oA biosynthesis

metabolism

o acid transmembrane transporter activity

group of donors, oxygen as acceptor  
DP/CTP; (sce00240)Pyrimidine metabolism

ase II transcription factor binding

ylate transmembrane transporter activity

ing;G0:0001134 transcription regulator recruiting activity

s

e activity  
sis

or;G0:0016614 oxidoreductase activity, acting on CH-OH group of donors

ty

e activity, producing 5'-phosphomonoesters

yruvate

icrotubule motor activity

te => 2-oxoglutarate; (M00009)Citrate cycle (TCA cycle, Krebs cycle)

(sce04070)Phosphatidylinositol signaling system

003)Gluconeogenesis, oxaloacetate => fructose-6P

dehydrogenase activity

acid transmembrane transporter activity

;G0:0046943 carboxylic acid transmembrane transporter activity

stituted reducing group;G0:0042973 glucan endo-1,3-beta-D-glucosidase activity

Citrate cycle, second carbon oxidation, 2-oxoglutarate => oxaloacetate

bitor activity

5 organophosphate ester transmembrane transporter activity

nscription coregulator activity

ng transcription factor activity

chinery binding

ity

ase activity

1 RNA polymerase II basal transcription factor binding  
rane transporter activity

onuclease activity

ransporter activity

e transporter activity

ransferase activity

DP/CTP; (sce)Guanine ribonucleotide biosynthesis IMP => GDP, GTP  
brane transporter activity  
g metal ions, NAD or NADP as acceptor  
453 histone demethylase activity (H3-K4 specific)

ptidase activity

er binding

binding

ctivity

.tochondria in high-throughput studies; protein abundance increases in response to DNA rep

;GO:0000976 transcription regulatory region sequence-specific DNA binding

ase activity

porter activity

AD-dependent histone deacetylase activity

binding, bending

UMP; (sce00240)Pyrimidine metabolism

rogen bonds

id transmembrane transporter activity

ransmembrane transporter activity

A methyltransferase activity

y

ine (PC) biosynthesis, choline => PC

n transmembrane transporter activity

(sce00290)Valine, leucine and isoleucine biosynthesis  
nthesis, 2-oxoisovalerate => 2-oxoisocaproate

ransporter activity;G0:0042626 ATPase activity, coupled to transmembrane movement of subs  
g transmembrane transporter activity

transferase activity

ivity

n transmembrane transporter activity

tivity

demethylase activity

amma-subunit complex binding

g metal ions, NAD or NADP as acceptor

polymerase II proximal promoter sequence-specific DNA binding

003)Gluconeogenesis, oxaloacetate => fructose-6P

phosphate ester transmembrane transporter activity

phosphatase activity

l spore wall permeability and sensitivity to beta-glucanase digestion  
se activity

0977 RNA polymerase II regulatory region sequence-specific DNA binding

adenine nucleotide transmembrane transporter activity

ase III general transcription initiation factor activity

id transmembrane transporter activity

sferase activity

ity

A

ed fatty acids  
erring acyl groups

on the CH-CH group of donors



eme-copper terminal oxidase activity

doreductase activity  
ring glycosyl groups  
ctivity

binding

sequence-specific double-stranded DNA binding

UMP; (sce00240)Pyrimidine metabolism

73 metal ion transmembrane transporter activity

ing  
eric DNA binding

symporter activity

sequence-specific double-stranded DNA binding  
, fructose 6P => ribose 5P; (M00004)Pentose phosphate pathway (Pentose phosphate cycle)  
00260)Glycine, serine and threonine metabolism

1228 DNA-binding transcription activator activity, RNA polymerase II-specific

ity

ivity

sition metal ion transmembrane transporter activity

brane transporter activity

ation; expression induced by calcium shortage; YJL147W is a non-essential gene

s acceptor

membrane transporter activity

e activity

, fructose 6P => ribose 5P; (M00004)Pentose phosphate pathway (Pentose phosphate cycle)  
, fructose 6P => ribose 5P; (M00004)Pentose phosphate pathway (Pentose phosphate cycle)

oate => ubiquinone; (sce00130)Ubiquinone and other terpenoid-quinone biosynthesis

imilar compound as acceptor

symporter activity

ty, RNA polymerase II-specific

binding

ansferring one-carbon groups

binding

ate binding

oate => ubiquinone; (sce00130)Ubiquinone and other terpenoid-quinone biosynthesis

transmembrane transporter activity

003)Gluconeogenesis, oxaloacetate => fructose-6P

s acceptor

in-dependent protein kinase activity

0977 RNA polymerase II regulatory region sequence-specific DNA binding

1 groups

Citrate cycle, second carbon oxidation, 2-oxoglutarate => oxaloacetate

y;G0:0005338 nucleotide-sugar transmembrane transporter activity

ific DNA-binding transcription factor binding;G0:0001085 RNA polymerase II transcription  
ity;G0:0004722 protein serine/threonine phosphatase activity

oenzyme complex

transmembrane transporter activity

Citrate cycle, second carbon oxidation, 2-oxoglutarate => oxaloacetate

osphatase activity

y

serine/threonine phosphatase activity  
inase inhibitor activity

tivity

DP/CTP; (sce00240)Pyrimidine metabolism

ds

id transmembrane transporter activity

on a protein  
n a sulfur group of donors

dary metabolites

tidase activity

on transmembrane transporter activity  
ng transcription factor activity

tinyl hydrolase activity

e activity

eptide transmembrane transporter activity

ctor activity

chinery binding  
organophosphate ester transmembrane transporter activity

r;GO:0071949 FAD binding

type endopeptidase activity

transferase activity

tivity;G0:0030696 tRNA (m5U54) methyltransferase activity

phosphate binding

biosynthesis

binding

s acceptor

0977 RNA polymerase II regulatory region sequence-specific DNA binding

tivity

acid transmembrane transporter activity

0977 RNA polymerase II regulatory region sequence-specific DNA binding

0016896 exoribonuclease activity, producing 5'-phosphomonoesters

e activity

987 proximal promoter sequence-specific DNA binding  
bule motor activity

but not peptide) bonds, in cyclic amidines  
t

lfur cluster binding

ce-specific DNA binding

n transmembrane transporter activity

osome

binding

ctivity

acceptor;G0:0016614 oxidoreductase activity, acting on CH-OH group of donors

CS



ase II transcription factor binding

0977 RNA polymerase II regulatory region sequence-specific DNA binding

ds

003)Gluconeogenesis, oxaloacetate => fructose-6P

rane transporter activity

1 RNA polymerase II basal transcription factor binding

regulator activity

rane transporter activity

e activity

sis

on the CH-CH group of donors

sis

ivity

ransporter activity

activity

GO:0034595 phosphatidylinositol phosphate 5-phosphatase activity

binding

GO:0008138 protein tyrosine/serine/threonine phosphatase activity  
se activity

ption initiation factor activity  
biosynthesis

transmembrane transporter activity

ed fatty acids

:0016879 ligase activity, forming carbon-nitrogen bonds

erol O-acyltransferase activity

se activity

ty

anine, tyrosine and tryptophan biosynthesis

ore promoter sequence-specific DNA binding

ase II transcription factor binding

(sce00564)Glycerophospholipid metabolism

DNA binding

lycerophospholipid metabolism

ansferring one-carbon groups  
transmembrane transporter activity

R093C-A, that arose from the whole genome duplication

embrane transporter activity  
e activity  
2 groups;G0:0016491 oxidoreductase activity

n transmembrane transporter activity

ding;G0:0001013 RNA polymerase I regulatory region DNA binding

tivity

organophosphate ester transmembrane transporter activity

ansferase activity

anic anion transmembrane transporter activity  
bolites

g metal ions, NAD or NADP as acceptor

Autophagy – yeast

; (sce00250) Alanine, aspartate and glutamate metabolism

ism  
se activity, acting on carbon–nitrogen (but not peptide) bonds

inase activity

monoesters

ansmembrane transporter activity  
g

ing;G0:0001134 transcription regulator recruiting activity

003) Gluconeogenesis, oxaloacetate => fructose-6P

romatic amino acid transmembrane transporter activity

tivator activity

605 organophosphate ester transmembrane transporter activity  
cleotide transmembrane transporter activity

binding

tivity

ol signaling system

IMP => ADP, ATP

r;G0:0010181 FMN binding

idylinositol (GPI)-anchor biosynthesis

se 6P => ribulose 5P; (M00004)Pentose phosphate pathway (Pentose phosphate cycle)

ctivity

s acceptor  
or activity



1228 DNA-binding transcription activator activity, RNA polymerase II-specific  
ing

oreductase activity  
tivity

e activity

nsmembrane transporter activity

osensitive ion channel activity

clease activity

annosidase activity  
s acceptor

sis  
1228 DNA-binding transcription activator activity, RNA polymerase II-specific

sferase activity

ne; (sce00300)Lysine biosynthesis

epressor activity

1228 DNA-binding transcription activator activity, RNA polymerase II-specific  
1228 DNA-binding transcription activator activity, RNA polymerase II-specific

biosynthesis, AAA pathway, 2-oxoglutarate => 2-aminoadipate => lysine

nsferase activity

as acceptor;GO:0016667 oxidoreductase activity, acting on a sulfur group of donors

ne transporter activity

e activity

te => 2-oxoglutarate; (M00009)Citrate cycle (TCA cycle, Krebs cycle)

porter activity

vity

tivity;G0:0005290 L-histidine transmembrane transporter activity

ADP as acceptor;G0:0016903 oxidoreductase activity, acting on the aldehyde or oxo group o  
phosphate binding

; (sce00230)Purine metabolism

0977 RNA polymerase II regulatory region sequence-specific DNA binding  
idylinositol (GPI)-anchor biosynthesis

ivity

serine residue binding

ganic cation transmembrane transporter activity

g on the CH-CH group of donors, quinone or related compound as acceptor

erase activity, transferring acyl groups

ption initiation factor activity

ansmembrane transporter activity

0977 RNA polymerase II regulatory region sequence-specific DNA binding

n a sulfur group of donors

l groups

to the mitochondria

ific DNA binding;GO:0001181 RNA polymerase I general transcription initiation factor acti

tivity

on factor activity  
) methyltransferase activity

DNA binding

c cation transmembrane transporter activity

ity

merase II-specific

m

porter activity

1228 DNA-binding transcription activator activity, RNA polymerase II-specific

vity

ransferase activity

4P => chorismate; (sce00400)Phenylalanine, tyrosine and tryptophan biosynthesis

ansporter activity

acid transmembrane transporter activity

acid transmembrane transporter activity  
ed fatty acids

binding;G0:0001012 RNA polymerase II regulatory region DNA binding

olymerase II transcription cofactor binding

ase II transcription regulator recruiting activity

ine/threonine phosphatase activity

lecular oxidoreductase activity

ivity

idylinositol (GPI)-anchor biosynthesis

cing 5'-phosphomonoesters

a; YKL133C has a paralog, MGR3, that arose from the whole genome duplication

te => 2-oxoglutarate; (M00009)Citrate cycle (TCA cycle, Krebs cycle)

or;G0:0016879 ligase activity, forming carbon-nitrogen bonds

r;G0:0010181 FMN binding

lin-dependent protein serine/threonine kinase regulator activity

003)Gluconeogenesis, oxaloacetate => fructose-6P

3' exodeoxyribonuclease activity

ism

ivity

ate => valine / 2-oxobutanoate => isoleucine; (sce)Isoleucine biosynthesis, threonine =>



ce)Galactose degradation, Leloir pathway, galactose => alpha-D-glucose-1P

A

l bonds

n transmembrane transporter activity

polymerase II-specific;G0:0008270 zinc ion binding

inding

ing

CH-CH group of donors, NAD or NADP as acceptor  
s acceptor

symporter activity

003)Gluconeogenesis, oxaloacetate => fructose-6P

on a protein

(sce00290)Valine, leucine and isoleucine biosynthesis

tarate => 2-aminoadipate => lysine; (sce00300)Lysine biosynthesis

e activity

AD-dependent histone deacetylase activity

s acceptor

0 protein transmembrane transporter activity

se 6P => ribulose 5P; (M00004)Pentose phosphate pathway (Pentose phosphate cycle)

n a sulfur group of donors

1228 DNA-binding transcription activator activity, RNA polymerase II-specific

n the CH-NH<sub>2</sub> group of donors;GO:0016491 oxidoreductase activity  
e activity

ganic cation transmembrane transporter activity

transmembrane transporter activity

sition metal ion transmembrane transporter activity

nsmembrane transporter activity  
phosphomonoesters

binding

doreductase activity  
syl bonds

as acceptor  
s acceptor

ne transporter activity

activity, alcohol group as acceptor  
ity, alcohol group as acceptor

Citrate cycle, second carbon oxidation, 2-oxoglutarate => oxaloacetate

l oxidoreductase activity, acting on NAD(P)H

ty

binding

metabolism  
oA biosynthesis

(sce00290)Valine, leucine and isoleucine biosynthesis

te transmembrane transporter activity  
brane transporter activity

ed fatty acids

inase binding

.trogen limitation in a GLN3, GAT1-independent manner

1228 DNA-binding transcription activator activity, RNA polymerase II-specific  
1228 DNA-binding transcription activator activity, RNA polymerase II-specific

1228 DNA-binding transcription activator activity, RNA polymerase II-specific

on the CH-CH group of donors

s acceptor

1228 DNA-binding transcription activator activity, RNA polymerase II-specific

binding

saminase activity

ty

te => H<sub>2</sub>S

on a protein

s acceptor

sferase activity

097472 cyclin-dependent protein kinase activity

0:0004860 protein kinase inhibitor activity

binding

73 metal ion transmembrane transporter activity

g transcription factor binding

ine, aspartate and glutamate metabolism

ity

sferase activity

metabolites

oreductase activity, oxidizing metal ions

ctivity;G0:0000295 adenine nucleotide transmembrane transporter activity

acid transmembrane transporter activity

097472 cyclin-dependent protein kinase activity

tidase activity

-phosphate binding

ule motor activity

vity, transferring glycosyl groups

003)Gluconeogenesis, oxaloacetate => fructose-6P

anine, tyrosine and tryptophan biosynthesis

Galactose metabolism

ase activity

h incorporation or reduction of molecular oxygen, NAD(P)H as one donor, and incorporation

=> isoleucine; (sce00290)Valine, leucine and isoleucine biosynthesis

le)

idylinositol (GPI)-anchor biosynthesis

polymerase II-specific;G0:0043565 sequence-specific DNA binding



ce-specific DNA binding

nscription factor binding  
idylinositol (GPI)-anchor biosynthesis  
s

transmembrane transporter activity

tivity

biosynthesis

ing  
ng  
acceptor;G0:0016614 oxidoreductase activity, acting on CH-OH group of donors

n transmembrane transporter activity

1228 DNA-binding transcription activator activity, RNA polymerase II-specific

UMP; (sce00250)Alanine, aspartate and glutamate metabolism

:0016695 oxidoreductase activity, acting on hydrogen as donor

tivity, coupled to transmembrane movement of substances

400)Phenylalanine, tyrosine and tryptophan biosynthesis

biosynthesis

ng transcription factor activity

0977 RNA polymerase II regulatory region sequence-specific DNA binding

ism

rane transporter activity

ity

1228 DNA-binding transcription activator activity, RNA polymerase II-specific

ate => valine / 2-oxobutanoate => isoleucine; (sce)Isoleucine biosynthesis, threonine =>

idylinositol (GPI)-anchor biosynthesis

g metal ions, NAD or NADP as acceptor

ry metabolites

s acceptor

ET pathway; preference for substrates with downstream transmembrane domains; interacts with

ygous diploid mutant shows an increase in glycogen accumulation

1228 DNA-binding transcription activator activity, RNA polymerase II-specific  
tivity

ing

groups

ltransferase activity

tic activity, acting on a tRNA  
e N-methyltransferase activity

bonuclease activity, producing 5'-phosphomonoesters  
sis

ring glycosyl groups

r;G0:0010181 FMN binding

n transmembrane transporter activity

e) methyltransferase activity

tivity

tion initiation factor activity  
anine, tyrosine and tryptophan biosynthesis

tivity, active with either ribo- or deoxyribonucleic acids and producing 5'-phosphomonoes

biosynthesis, AAA pathway, 2-oxoglutarate => 2-aminoadipate => lysine

e N-methyltransferase activity

lyase activity

phosphoprotein phosphatase activity

t rRNA binding

ding

phosphate binding

er activity

A binding;GO:0001030 RNA polymerase III type 1 promoter DNA binding

21 phosphoprotein phosphatase activity

- yeast

ansmembrane transporter activity

0 protein transmembrane transporter activity

regulator activity

ity

=> alpha-D-glucose-1P; (sce00052)Galactose metabolism

leotide-sugar transmembrane transporter activity

=> PE; (sce00564)Glycerophospholipid metabolism  
sis

ynucleotide kinase activity

binding

e activity

ate => valine / 2-oxobutanoate => isoleucine; (sce)Isoleucine biosynthesis, threonine =>

tivity

le)

ule motor activity  
bule motor activity

de transmembrane transporter activity

idylinositol (GPI)-anchor biosynthesis

ransporter activity

, producing 5'-phosphomonoesters

0:0016740 transferase activity

acid transmembrane transporter activity

tive transmembrane transporter activity

ransporter activity  
e transporter activity

cleotide-sugar transmembrane transporter activity

lease activity, producing 3'-phosphomonoesters



porter activity

activity;G0:0042625 ATPase coupled ion transmembrane transporter activity

n transmembrane transporter activity

(sce00564)Glycerophospholipid metabolism

arginine N-methyltransferase activity

IMP => ADP, ATP

ty

athways

II repressing transcription factor binding  
drolase activity, acting on carbon-nitrogen (but not peptide) bonds, in linear amides

thyltransferase activity

ing

e activity

ways

ity, alcohol group as acceptor

-CH group of donors, NAD or NADP as acceptor

894 endonuclease activity, active with either ribo- or deoxyribonucleic acids and produci  
ity;G0:0035312 5'-3' exodeoxyribonuclease activity

74 ligase activity

ntesis

sis

ctivity

ansporter activity

; (sce00670)One carbon pool by folate

0977 RNA polymerase II regulatory region sequence-specific DNA binding

Fructose and mannose metabolism

e activity

regulator activity

ing uptake or incorporation of uracil into RNA; proposed to be involved in the metabolism

on a protein

ansporter activity

Citrate cycle, second carbon oxidation, 2-oxoglutarate => oxaloacetate

imilar compound as acceptor

45 manganese ion binding

ing

type endopeptidase activity

ty  
015405 P-P-bond-hydrolysis-driven transmembrane transporter activity  
biosynthesis

ransmembrane transporter activity  
cing 5'-phosphomonoesters

binding;GO:0001012 RNA polymerase II regulatory region DNA binding

s acceptor  
monoesters

ase II transcription factor binding  
regulator activity

te ester transmembrane transporter activity

e N-methyltransferase activity

400)Phenylalanine, tyrosine and tryptophan biosynthesis

binding

cs

0977 RNA polymerase II regulatory region sequence-specific DNA binding  
, core module involving three-carbon compounds  
yl groups other than amino-acyl groups

te => 2-oxoglutarate; (M00009)Citrate cycle (TCA cycle, Krebs cycle)

0977 RNA polymerase II regulatory region sequence-specific DNA binding

metabolism  
-like protein-specific protease activity

membrane transporter activity

ing

carbon-sulfur bonds

, fructose 6P => ribose 5P; (sce00040)Pentose and glucuronate interconversions  
transcription factor complex binding

xosyl groups

ty

porter activity

A binding;G0:0001030 RNA polymerase III type 1 promoter DNA binding

on a protein



atidylethanolamine (PE) biosynthesis, ethanolamine => PE

asal transcription factor binding

c cation transmembrane transporter activity

ce-specific DNA binding

ctor activity

ty

species

ty

ng

sition metal ion transmembrane transporter activity

oate => ubiquinone; (sce00130)Ubiquinone and other terpenoid-quinone biosynthesis

-phosphate binding

saminase activity

transcription coactivator activity

membrane transporter activity

inosine monophosphate biosynthesis, PRPP + glutamine => IMP

monoesters

transferring one-carbon groups

de N-methyltransferase activity

ator activity

ribosome

binding  
ing  
s acceptor

1228 DNA-binding transcription activator activity, RNA polymerase II-specific  
l groups  
binding  
ase activity, transferring one-carbon groups

s, oxygen as acceptor  
idylinositol (GPI)-anchor biosynthesis

biosynthesis

acting on the CH-CH group of donors

ctivity

oximal promoter sequence-specific DNA binding

tarate => 2-aminoadipate => lysine; (sce00300)Lysine biosynthesis  
ontaining groups

e activity

binding

le)

0977 RNA polymerase II regulatory region sequence-specific DNA binding

ding;G0:0140223 general transcription initiation factor activity

some biogenesis in eukaryotes

phosphate binding  
se activity

activity

tive transmembrane transporter activity

ed fatty acids

DP/CTP; (sce00240)Pyrimidine metabolism

ivity

atidylethanolamine (PE) biosynthesis, ethanolamine => PE

inase inhibitor activity

chinery binding

tone deacetylase activity (H3-K14 specific)

oreductase activity

oA biosynthesis

of donors, oxygen as acceptor

highly sensitive to azaserine and resistant to sodium-0-vandate  
ding;G0:0001013 RNA polymerase I regulatory region DNA binding

cceptor

activity

syl bonds

/threonine kinase activity

binding

AD-dependent histone deacetylase activity

anscription factor binding

y, forming carbon-sulfur bonds

y;G0:0051998 protein carboxyl O-methyltransferase activity  
0287 magnesium ion binding

hylated histone binding

ity

s acceptor

type endopeptidase activity

e transporter activity

activity

=> isoleucine; (sce00290)Valine, leucine and isoleucine biosynthesis  
ansferring one-carbon groups



ionine transmembrane transporter activity

UMP; (sce00240)Pyrimidine metabolism  
l groups  
sporter activity

acid transmembrane transporter activity  
serine/threonine phosphatase activity

-like protein-specific protease activity

expression causes a cell cycle delay or arrest  
ase II transcription factor binding  
0:0043492 ATPase activity, coupled to movement of substances  
on factor binding

s acceptor

tivity

e N-methyltransferase activity

e activity

with incorporation or reduction of molecular oxygen, 2-oxoglutarate as one donor, and in

on a protein

sequence-specific double-stranded DNA binding  
etate

; (sce00670)One carbon pool by folate

ity

003)Gluconeogenesis, oxaloacetate => fructose-6P

rane transporter activity

ansferase activity

but not peptide) bonds, in cyclic amidines

ty

aspartate => homoserine => threonine

activity

activity, active with either ribo- or deoxyribonucleic acids and producing 5'-phosphomono-

thiolate from a sulfur group of donors

; (sce00230)Purine metabolism

transmembrane transporter activity

sequence-specific DNA binding;GO:0000987 proximal promoter sequence-specific DNA binding

regulator activity

thiol groups

transmembrane transporter activity

polymerase I regulatory region sequence-specific DNA binding

ity;G0:0000179 rRNA (adenine-N6,N6-)-dimethyltransferase activity

metabolism

yase activity  
ibonuclease activity

inding

rane transporter activity

ule motor activity  
ways

ansporting ATPase activity

ctivity, acting on a sulfur group of donors, quinone or similar compound as acceptor

chenodeoxycholate; (hsa00120)Primary bile acid biosynthesis

chinery binding

ET pathway; preference for substrates with downstream transmembrane domains; interacts wi

; (sce00220)Arginine biosynthesis

A binding;G0:0001030 RNA polymerase III type 1 promoter DNA binding

UMP; (sce00240)Pyrimidine metabolism

NA polymerase II-specific;G0:0000981 DNA-binding transcription factor activity, RNA polym

embrane transporter activity

brane anchor

; (sce00330)Arginine and proline metabolism

te ester transmembrane transporter activity

015405 P-P-bond-hydrolysis-driven transmembrane transporter activity  
ivity

ansferring one-carbon groups

ransporter activity

vity



regulator activity

ulator activity;G0:0030295 protein kinase activator activity

nthesis

ways

tide) bonds

g on the CH-CH group of donors

s acceptor

s acceptor

binding  
ivity

on factor activity

680 peptide transmembrane transporter activity

1228 DNA-binding transcription activator activity, RNA polymerase II-specific

ivity

A binding;GO:0001030 RNA polymerase III type 1 promoter DNA binding

1228 DNA-binding transcription activator activity, RNA polymerase II-specific

onuclease activity

;GO:0000976 transcription regulatory region sequence-specific DNA binding

0 protein transmembrane transporter activity

; (sce00230)Purine metabolism

g metal ions, NAD or NADP as acceptor

hibitor activity

group of donors, oxygen as acceptor

n transmembrane transporter activity

syl bonds

.ng agent MMS

vity, transferring glycosyl groups

erase activity, transferring acyl groups

nthesis  
rane transporter activity

4P => chorismate; (sce00400) Phenylalanine, tyrosine and tryptophan biosynthesis  
group as acceptor

e N-methyltransferase activity

on a protein

tivity

s acceptor

se 6P => ribulose 5P; (M00004)Pentose phosphate pathway (Pentose phosphate cycle)  
and epimerase activity

serine residue binding

sulfide oxidoreductase activity

s acceptor

tivity

ting ATPase activity

binding

ivity

binding;G0:0001012 RNA polymerase II regulatory region DNA binding

oreductase activity

deoxyribonucleotide kinase activity

gulator activity, nucleic acid binding

ivity

ity

tivity

1228 DNA-binding transcription activator activity, RNA polymerase II-specific

ce)Galactose degradation, Leloir pathway, galactose => alpha-D-glucose-1P

ransporter activity;G0:0042626 ATPase activity, coupled to transmembrane movement of subs



1228 DNA-binding transcription activator activity, RNA polymerase II-specific

DNA binding

Citrate cycle, second carbon oxidation, 2-oxoglutarate => oxaloacetate

on a protein

type endopeptidase activity

ism

0977 RNA polymerase II regulatory region sequence-specific DNA binding

porter activity

ty

oA biosynthesis

ine/threonine phosphatase activity

e promoter binding

;GO:1990939 ATP-dependent microtubule motor activity

ity

Pentose and glucuronate interconversions

ups other than amino-acyl groups

680 sulfur-containing amino acid secondary active transmembrane transporter activity  
ing  
on a protein

ar amides;G0:0016810 hydrolase activity, acting on carbon-nitrogen (but not peptide) bond

:0016746 transferase activity, transferring acyl groups

s acceptor

nsmembrane transporter activity  
on a protein  
acid transmembrane transporter activity

monoesters

; arose from the whole genome duplication

cid transmembrane transporter activity  
130)Ubiquinone and other terpenoid-quinone biosynthesis

esters

e transporter activity

binding

transmembrane transporter activity

activity, transferring acyl groups

n transmembrane transporter activity

of donors, disulfide as acceptor;G0:0016903 oxidoreductase activity, acting on the aldehydes;G0:0000987 proximal promoter sequence-specific DNA binding activity

; (sce00670)One carbon pool by folate

e N-methyltransferase activity

transmembrane transporter activity  
dehydrogenase activity

vity

ic cation transmembrane transporter activity  
regulator activity

s acceptor

ty

tivity

ate binding

ocalize to the vacuole, while SWAT-GFP fusion also localizes to the endoplasmic reticulum  
ctor activity

n transmembrane transporter activity  
Fructose and mannose metabolism

bonds

pha-N-acetyltransferase activity

type endopeptidase activity

; (sce00230)Purine metabolism  
ng transcription factor activity

id transmembrane transporter activity

te ester transmembrane transporter activity

ing

097472 cyclin-dependent protein kinase activity  
transferase activity

aspartate => homoserine => threonine

Citrate cycle, second carbon oxidation, 2-oxoglutarate => oxaloacetate

e activity

activity

onuclease activity

e activity

sition metal ion transmembrane transporter activity

on a protein

s acceptor

ng

0977 RNA polymerase II regulatory region sequence-specific DNA binding  
tivity

rane transporter activity

A binding;G0:0001030 RNA polymerase III type 1 promoter DNA binding



0976 transcription regulatory region sequence-specific DNA binding

ne; (sce00260)Glycine, serine and threonine metabolism

1228 DNA-binding transcription activator activity, RNA polymerase II-specific

cation transmembrane transporter activity

s acceptor

A binding;GO:0001030 RNA polymerase III type 1 promoter DNA binding

ase activity

-phosphate binding

8270 zinc ion binding

II-specific

; (M00019)Valine/isoleucine biosynthesis, pyruvate => valine / 2-oxobutanoate => isoleuci

Citrate cycle, second carbon oxidation, 2-oxoglutarate => oxaloacetate

rane transporter activity

r activity

syl bonds

ty

ium ion transmembrane transporter activity  
ctivity  
tivity

s, oxygen as acceptor

y

type endopeptidase activity

ansporter activity  
-like protein-specific protease activity

ctivity

etabolism

nding

ring glycosyl groups

biosynthesis

e activity

adenine nucleotide transmembrane transporter activity

regulator activity

rane transporter activity

sis

ase II transcription factor binding

Pentose and glucuronate interconversions  
on a protein

ways

type endopeptidase activity

serine residue binding  
or transmembrane transporter activity

;GO:0046943 carboxylic acid transmembrane transporter activity

sis

ivity

y

on transmembrane transporter activity  
y

oA biosynthesis

hydrides, in phosphorus-containing anhydrides

polymerase II-specific;GO:0043565 sequence-specific DNA binding  
aired donors, with incorporation or reduction of molecular oxygen, 2-oxoglutarate as one

se activity

tivity  
te => 2-oxoglutarate; (M00012)Glyoxylate cycle

stituted reducing group;G0:0042973 glucan endo-1,3-beta-D-glucosidase activity

ific DNA binding;G0:0001181 RNA polymerase I general transcription initiation factor acti

brane transporter activity

activity;G0:0042625 ATPase coupled ion transmembrane transporter activity

ctivity

rane transporter activity  
ethyltransferase activity

with incorporation or reduction of molecular oxygen

e transmembrane transporter activity

r;G0:0016614 oxidoreductase activity, acting on CH-OH group of donors

ce)Galactose degradation, Leloir pathway, galactose => alpha-D-glucose-1P

ing

ein phosphatase regulator activity



rane transporter activity  
00450) Selenocompound metabolism

e regulator activity

doreductase activity  
diester hydrolase activity  
transmembrane transporter activity











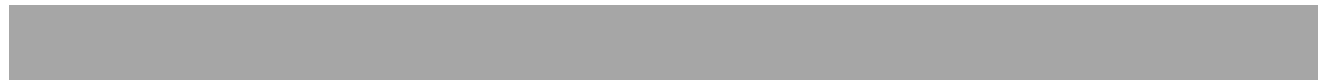

orporation of two atoms of oxygen into one donor

in ATP/ADP exchange





ygen;G0:0051213 dioxygenase activity





donors

donors

factor binding

ceptor

or similar compound as acceptor











ne

2-oxobutanoate  $\Rightarrow$  isoleucine















ng

sters







sters



plication stress

tances









factor binding

































f donors



vity







2-oxobutanoate => isoleucine

















of one atom of oxygen



2-oxobutanoate  $\Rightarrow$  isoleucine

.th Snd1p, Env10p/Snd2p, and Sec61p-translocon subunits; can compensate for loss of SRP; r



ters





2-oxobutanoate  $\Rightarrow$  isoleucine







ng 3'-phosphomonoesters



1 of purine and pyrimidine base analogues; deletion mutants are sensitive to HAP and AHA





























corporation of one atom each of oxygen into both donors



oesters





with Snd1p, Pho88p/Snd3p, and Sec61p-translocon subunits; can compensate for loss of SRP; r

erase II-specific





















tances







yde or oxo group of donors













ne









donor, and incorporation of one atom each of oxygen into both donors

vity

















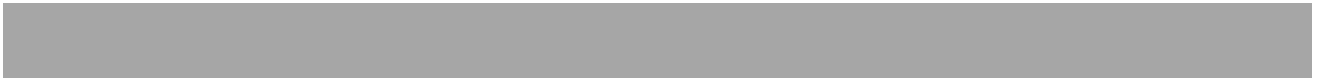













































































































































role in phosphate transport, interacting with pho88, and in the maturation of secretory pr



























































role in the late endosome-vacuole interface; putative role in secretory protein quality cc









































































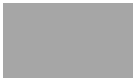













































































































































roteins



























































ontrol
